# Supplementary material for: Transcriptome Dynamics of Brassica juncea Leaves in Response to Omnivorous Beet Armyworm (Spodoptera exigua, Hübner)
Source: MDPI journal article supplement (doi:10.3390/ijms242316690), 2023-11-24
Supplement: s1 [file s1]

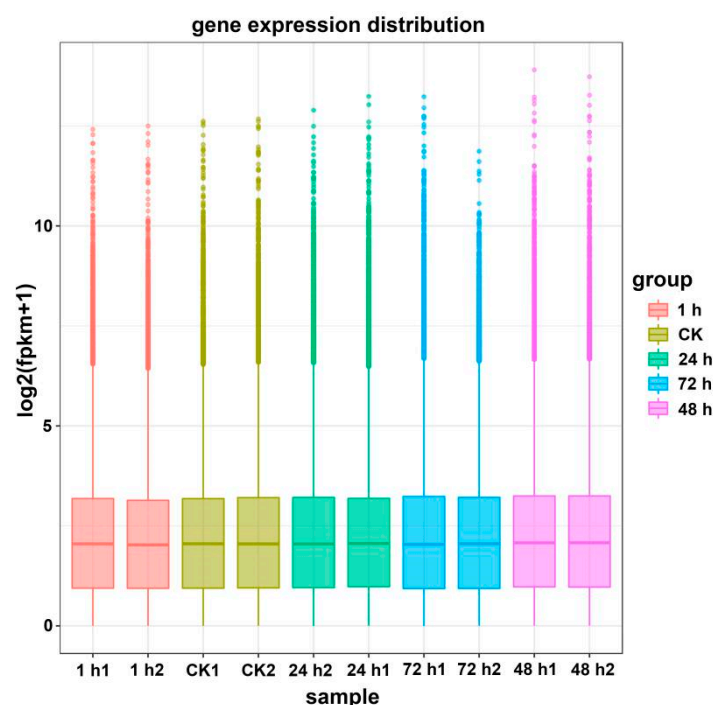

**Figure S1.** Box diagram of the gene expression distribution of each sample after feeding on mustard leaves by beet armyworm larvae. The X-axis represents sample name. The Y-axis represents  $\log_2(\text{fpkm} + 1)$ . Fpkm (expected number of Fragments Per Kilobase of transcript sequence per Millions base pairs sequenced) refers to the number of fragments per Kilobase length from a gene in per million fragments.

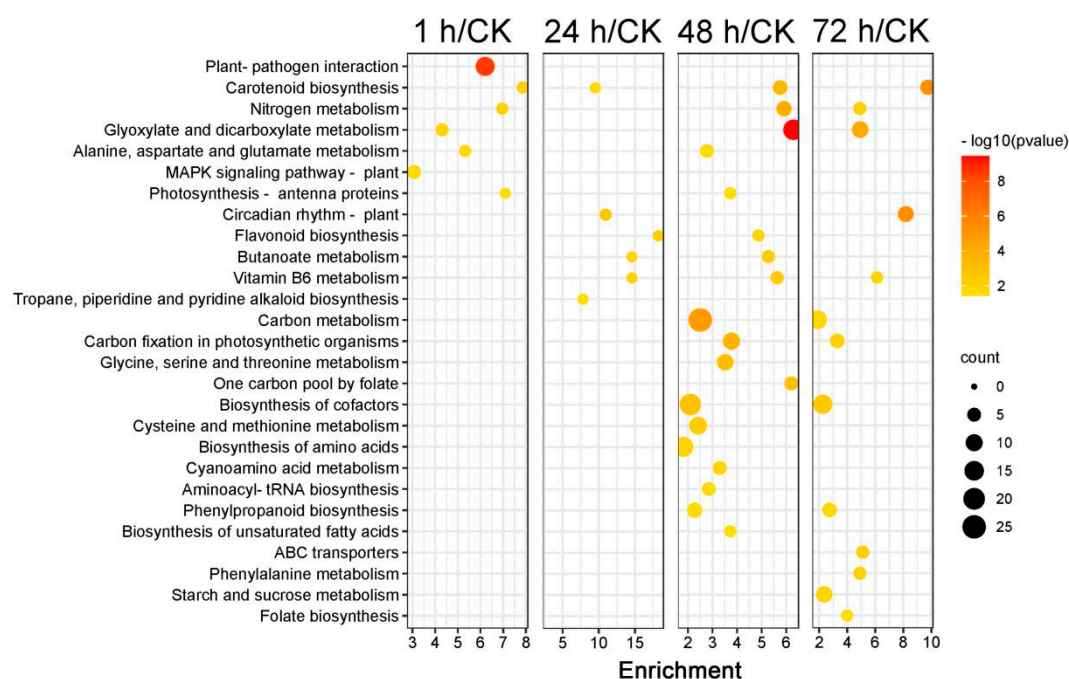

**Figure S2.** KEGG classification of the down-regulated DEGs. The X-axis represents the enrichment, which is the ratio of the number of differentially expressed genes to the total number of genes in a certain pathway. The color and size of the dots represent the range of the  $-\log_{10}(\text{pvalue})$  and the number of DEGs mapped to the indicated pathways, respectively.

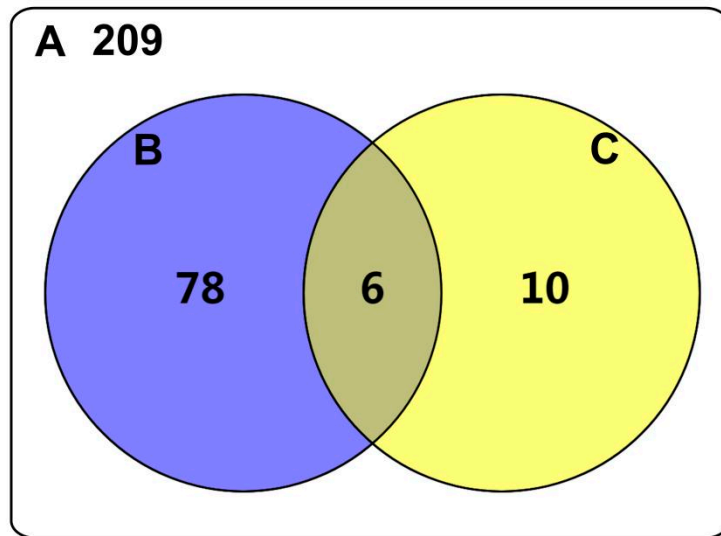

**Figure S3.** The number of DEGs involved in GSL biosynthesis and sulfur assimilation which have a different expression pattern after beet armyworm larvae chewing in *B. juncea*. **(A)** The total number of genes related to GSL biosynthesis and sulfur assimilation in *B. juncea*. **(B)** The DEGs which have been up-regulated at least at one time point after beet armyworm chewing in *B. juncea*. **(C)** The DEGs which have been down-regulated at least at one time point after beet armyworm chewing in *B. juncea*.
