# Supplementary material for: Transcriptome Dynamics of Brassica juncea Leaves in Response to Omnivorous Beet Armyworm (Spodoptera exigua, Hübner)
Source: MDPI journal article supplement (doi:10.3390/ijms242316690), 2023-11-24
Supplement: s1 [file s1]

**Table S1.** Glucosinolate content and constituent in the leaves of *Brassica juncea* after beet armyworm larvae chewing.

|      | Progoitrin                | Sinigrin       | Glucoraphanin  | Gluconapin    | 4-OH-Glucobr<br>assicin | Glucobrassicin | 4-Methoxy-Glu<br>cobrassicin | 1-Methoxy-Glu<br>cobrassicin |
|------|---------------------------|----------------|----------------|---------------|-------------------------|----------------|------------------------------|------------------------------|
| CK   | 0.125±0.015b <sup>1</sup> | 49.474±9.741bc | 0.198±0.013a   | 0.228±0.042bc | 0.334±0.032b            | 0.157±0.004d   | 0.463±0.044ab                | 0.078±0.003a                 |
| 1 h  | 0.097±0.011b              | 41.893±2.927c  | 0.175±0.001ad  | 0.211±0.051c  | 0.397±0.036ab           | 0.175±0.011d   | 0.333±0.059ab                | 0.074±0.004a                 |
| 24 h | 0.190±0.002a              | 51.360±2.186bc | 0.180±0.020ab  | 0.248±0.002bc | 0.376±0.004ab           | 0.218±0.008c   | 0.292±0.052b                 | 0.076±0.021a                 |
| 48 h | 0.170±0.008a              | 63.648±6.774ab | 0.177±0.013ac  | 0.315±0.033ab | 0.429±0.049a            | 0.326±0.019b   | 0.417±0.034ab                | 0.090±0.005a                 |
| 72 h | 0.179±0.024a              | 70.891±0.141a  | 0.148±0.007bcd | 0.376±0.020a  | 0.358±0.026ab           | 0.560±0.024a   | 0.495±0.124a                 | 0.097±0.020a                 |

<sup>1</sup>Data are means ± SD. Data unit is µM/g DW. DW: dry weight. Means followed by different letters in each row are significantly different (P < 0.05).

**Table S2.** Overview of the mustard transcriptome sequencing analysis and assembly.

| Samples | Clean reads | Clean bases | GC Content | %≥Q30  | total_map          | unique_map         |
|---------|-------------|-------------|------------|--------|--------------------|--------------------|
| CK1     | 43,317,162  | 6.50 G      | 47.61%     | 90.95% | 39,530,337(91.26%) | 37,738,395(87.12%) |
| CK2     | 41,852,788  | 6.28 G      | 47.68%     | 91.39% | 38,198,174(91.27%) | 36,414,338(87.01%) |
| 1 h1    | 44,926,432  | 6.74 G      | 47.48%     | 90.56% | 40,766,116(90.74%) | 38,940,895(86.68%) |
| 1 h2    | 42,881,498  | 6.43 G      | 47.20%     | 90.99% | 39,100,055(91.18%) | 37,412,924(87.25%) |
| 24 h1   | 45,196,916  | 6.78 G      | 47.88%     | 91.17% | 41,479,437(91.77%) | 39,522,455(87.45%) |
| 24 h2   | 38,645,702  | 5.80 G      | 47.79%     | 90.82% | 35,016,474(90.61%) | 33,247,082(86.03%) |
| 48 h1   | 47,150,356  | 7.07 G      | 47.91%     | 91.19% | 43,264,370(91.76%) | 41,477,546(87.97%) |
| 48 h2   | 46,659,404  | 7.00 G      | 47.94%     | 90.67% | 42,214,323(90.47%) | 40,126,611(86.0%)  |
| 72 h1   | 45,956,978  | 6.89 G      | 48.26%     | 91.44% | 41,993,518(91.38%) | 39,861,785(86.74%) |
| 72 h2   | 45,807,882  | 6.87 G      | 47.01%     | 91.26% | 41,361,695(90.29%) | 39,245,744(85.67%) |

Note: Clean reads: the number of reads after raw data filtering; Clean bases: the number of bases after raw data filtering(clean base = clean reads \* 150bp); GC content: the percentage of GC-content in clean data; %≥Q30 : Q-score of clean data ≥30; Total\_map: the number of reads mapped to the reference genome and the percentage in clean reads; Unique\_map: the number of reads mapped to the unique location of the reference genome and the percentage in clean reads.

**Table S6.** KEGG enrichment analysis of up-regulated DEGs was compared among comparison pairs.

| Pathway                                                | 1 h/CK_up   | 24 h/CK_up  | 48 h/CK_up  | 72 h/CK_up  |
|--------------------------------------------------------|-------------|-------------|-------------|-------------|
| Ribosome                                               | 1.30576E-07 | -           | -           | -           |
| Protein processing in endoplasmic reticulum            | 5.74261E-05 | -           | -           | -           |
| Ribosome biogenesis in eukaryotes                      | 0.001118647 | -           | -           | -           |
| Glucosinolate biosynthesis                             | 0.016075141 | 4.1023E-07  | 0.008730686 | 5.22626E-05 |
| Sulfur metabolism                                      | 0.020575896 | -           | -           | -           |
| alpha-Linolenic acid metabolism                        | -           | 5.88148E-07 | 6.88526E-07 | 4.04523E-06 |
| 2-Oxocarboxylic acid metabolism                        | -           | 6.69894E-05 | 0.018802359 | 0.002335593 |
| Tryptophan metabolism                                  | -           | 0.008622389 | 0.017087506 | 0.01123207  |
| Monobactam biosynthesis                                | -           | 0.021032176 | 0.019560299 | -           |
| Valine, leucine and isoleucine biosynthesis            | -           | 0.032251211 | -           | -           |
| Photosynthesis - antenna proteins                      | -           | -           | 9.05652E-06 | -           |
| Plant hormone signal transduction                      | -           | -           | 0.000374367 | -           |
| Phenylpropanoid biosynthesis                           | -           | -           | 0.004623033 | -           |
| Cysteine and methionine metabolism                     | -           | -           | 0.007895114 | 0.000737719 |
| Tyrosine metabolism                                    | -           | -           | 0.013390588 | 0.006475569 |
| Tropane, piperidine and pyridine alkaloid biosynthesis | -           | -           | 0.013390588 | 0.006475569 |
| Zeatin biosynthesis                                    | -           | -           | 0.03396591  | 0.002644423 |
| Nitrogen metabolism                                    | -           | -           | 0.03396591  | -           |
| Phenylalanine metabolism                               | -           | -           | 0.038618567 | -           |
| Phenylalanine, tyrosine and tryptophan biosynthesis    | -           | -           | -           | 0.000257525 |
| Biosynthesis of nucleotide sugars                      | -           | -           | -           | 0.00577754  |
| Glycine, serine and threonine metabolism               | -           | -           | -           | 0.008316362 |
| Biosynthesis of various plant secondary metabolites    | -           | -           | -           | 0.008752632 |
| Glutathione metabolism                                 | -           | -           | -           | 0.019279552 |
| Amino sugar and nucleotide sugar metabolism            | -           | -           | -           | 0.02745209  |
| Isoquinoline alkaloid biosynthesis                     | -           | -           | -           | 0.030102974 |

**Table S6. Cont.**

| Pathway                           | 1 h/CK_up | 24 h/CK_up | 48 h/CK_up | 72 h/CK_up  |
|-----------------------------------|-----------|------------|------------|-------------|
| Biosynthesis of amino acids       | -         | -          | -          | 0.034518718 |
| Ascorbate and aldarate metabolism | -         | -          | -          | 0.040972603 |
| Other glycan degradation          | -         | -          | -          | 0.047364498 |

The value in the table is pvalue<0.05.

**Table S7.** KEGG enrichment analysis of down-regulated DEGs was compared among comparison pairs.

| pathway                                                | 1 h/CK_down | 24 h/CK_down | 48 h/CK_down | 72 h/CK_down |
|--------------------------------------------------------|-------------|--------------|--------------|--------------|
| Plant-pathogen interaction                             | 2.19296E-08 | -            | -            | -            |
| Carotenoid biosynthesis                                | 0.00606882  | 0.018160529  | 0.00040858   | 3.71884E-06  |
| Nitrogen metabolism                                    | 0.008601466 | -            | 0.000109903  | 0.007994668  |
| Glyoxylate and dicarboxylate metabolism                | 0.013210045 | -            | 3.63488E-10  | 6.37487E-05  |
| Alanine, aspartate and glutamate metabolism            | 0.018029031 | -            | 0.03174976   | -            |
| MAPK signaling pathway - plant                         | 0.022166105 | -            | -            | -            |
| Photosynthesis - antenna proteins                      | 0.031379025 | -            | 0.043502909  | -            |
| Circadian rhythm - plant                               | -           | 0.00238042   | -            | 3.22446E-06  |
| Flavonoid biosynthesis                                 | -           | 0.005043319  | 0.02101101   | -            |
| Butanoate metabolism                                   | -           | 0.007887468  | 0.005646499  | -            |
| Vitamin B6 metabolism                                  | -           | 0.007887468  | 0.004395014  | 0.011546659  |
| Tropane, piperidine and pyridine alkaloid biosynthesis | -           | 0.026375777  | -            | -            |
| Carbon metabolism                                      | -           | -            | 1.25883E-05  | 0.018531519  |

**Table S7. Cont.**

| <b>pathway</b>                              | <b>1 h/CK_down</b> | <b>24 h/CK_down</b> | <b>48 h/CK_down</b> | <b>72 h/CK_down</b> |
|---------------------------------------------|--------------------|---------------------|---------------------|---------------------|
| Carbon fixation in photosynthetic organisms | -                  | -                   | 0.000232675         | 0.009069978         |
| Glycine, serine and threonine metabolism    | -                  | -                   | 0.000815045         | -                   |
| One carbon pool by folate                   | -                  | -                   | 0.000873027         | -                   |
| Biosynthesis of cofactors                   | -                  | -                   | 0.001420707         | 0.003090147         |
| Cysteine and methionine metabolism          | -                  | -                   | 0.005118296         | -                   |
| Biosynthesis of amino acids                 | -                  | -                   | 0.014275364         | -                   |
| Cyanoamino acid metabolism                  | -                  | -                   | 0.015985815         | -                   |
| Aminoacyl-tRNA biosynthesis                 | -                  | -                   | 0.028632371         | -                   |
| Phenylpropanoid biosynthesis                | -                  | -                   | 0.032426124         | 0.020883098         |
| Biosynthesis of unsaturated fatty acids     | -                  | -                   | 0.043502909         | -                   |
| ABC transporters                            | -                  | -                   | -                   | 0.006885969         |
| Phenylalanine metabolism                    | -                  | -                   | -                   | 0.007994668         |
| Starch and sucrose metabolism               | -                  | -                   | -                   | 0.013142711         |
| Folate biosynthesis                         | -                  | -                   | -                   | 0.037219264         |

The value in the table is pvalue<0.05.
