# Supplementary material for: Transcriptome Dynamics of Brassica juncea Leaves in Response to Omnivorous Beet Armyworm (Spodoptera exigua, Hübner)
Source: Int J Mol Sci. 2023 Nov 24;24(23):16690. doi: 10.3390/ijms242316690 (PMC10706706; doi:10.3390/ijms242316690)
Supplement: Supplementary file 1 [file ijms-24-16690-s001.zip]

Archive with 11 entries (11 files):
- Figure S1-S3.pdf
- Table S1-S2, S6-S7.pdf
- Table S10.xlsx
- Table S11.xlsx
- Table S12.xlsx
- Table S13.xlsx
- Table S3.xlsx
- Table S4.xlsx
- Table S5.xlsx
- Table S8.xlsx
- Table S9.xlsx
