# Supplementary material for: Transcriptome Dynamics of Brassica juncea Leaves in Response to Omnivorous Beet Armyworm (Spodoptera exigua, Hübner)
Source: Int J Mol Sci. 2023 Nov 24;24(23):16690. doi: 10.3390/ijms242316690 (PMC10706706; doi:10.3390/ijms242316690)
Supplement: Supplementary file 1 [file ijms-24-16690-s001.zip › Table S3.xlsx]

## Sheet: DEGs
Table S3. Differentially expressed genes (DEGs) in mustard at four time points after chewed by beet armyworm larvae.
gene_id	1 h/CK Log2FC	24 h/CK Log2FC	48 h/CK Log2FC	72 h/CK Log2FC	Gene description	tf_family
BjuVA01G42210	4.0848	-	-2.6609	-	Q9LHA8|HS704_ARATH Heat shock 70 kDa protein 4 OS=Arabidopsis thaliana OX=3702 GN=HSP70-4 PE=1 SV=1 PF00012:Hsp70 protein	HSP70
BjuVB07G05310	4.36971	-	-1.13968	-	Q9LHA8|HS704_ARATH Heat shock 70 kDa protein 4 OS=Arabidopsis thaliana OX=3702 GN=HSP70-4 PE=1 SV=1 PF00012:Hsp70 protein	HSP70
BjuVB07G32200	3.71346	-	-1.19256	-	Q9LHA8|HS704_ARATH Heat shock 70 kDa protein 4 OS=Arabidopsis thaliana OX=3702 GN=HSP70-4 PE=1 SV=1 PF00012:Hsp70 protein	HSP70
BjuVA03G36940	3.98941	-	-1.97554	-	Q9LHA8|HS704_ARATH Heat shock 70 kDa protein 4 OS=Arabidopsis thaliana OX=3702 GN=HSP70-4 PE=1 SV=1 PF00012:Hsp70 protein	HSP70
BjuVA02G14170	3.67311	-	-	-	P55737|HS902_ARATH Heat shock protein 90-2 OS=Arabidopsis thaliana OX=3702 GN=HSP90-2 PE=1 SV=1 PF00183:Hsp90 protein|PF02518:Histidine kinase-, DNA gyrase B-, and HSP90-like ATPase	HATPase_c
BjuVA02G14230	3.4163	-	-	-	P55737|HS902_ARATH Heat shock protein 90-2 OS=Arabidopsis thaliana OX=3702 GN=HSP90-2 PE=1 SV=1 PF00183:Hsp90 protein|PF02518:Histidine kinase-, DNA gyrase B-, and HSP90-like ATPase	HATPase_c
BjuVB06G18920	3.36469	-	-1.97958	-2.06762	Q9ZW31|HS17B_ARATH 17.6 kDa class I heat shock protein 2 OS=Arabidopsis thaliana OX=3702 GN=HSP17.6B PE=2 SV=1 PF00011:Hsp20/alpha crystallin family	-
BjuVA10G33700	2.48562	-	-	-	P22954|HS702_ARATH Heat shock 70 kDa protein 2 OS=Arabidopsis thaliana OX=3702 GN=HSP70-2 PE=1 SV=2 PF00012:Hsp70 protein	HSP70
BjuVB01G44500	4.26687	-	-	-	PF04632:Fusaric acid resistance protein family	-
BjuVA03G20180	2.68563	-	-	-	Q39043|BIP2_ARATH Heat shock 70 kDa protein BIP2 OS=Arabidopsis thaliana OX=3702 GN=BIP2 PE=1 SV=2 PF00012:Hsp70 protein	HSP70
BjuVB02G30680	2.81499	-	-	-	Q8LPL3|ASO_ARATH L-ascorbate oxidase OS=Arabidopsis thaliana OX=3702 GN=AAO PE=1 SV=1 PF07731:Multicopper oxidase|PF07732:Multicopper oxidase|PF00394:Multicopper oxidase	-
BjuVB04G11450	-4.01034	-	-	-3.46904	Q9FH76|ABAH3_ARATH Abscisic acid 8'-hydroxylase 3 OS=Arabidopsis thaliana OX=3702 GN=CYP707A3 PE=1 SV=1 PF00067:Cytochrome P450	p450
BjuVA03G17020	2.52031	-	-	-	Q39043|BIP2_ARATH Heat shock 70 kDa protein BIP2 OS=Arabidopsis thaliana OX=3702 GN=BIP2 PE=1 SV=2 PF00012:Hsp70 protein	HSP70
BjuVB04G15310	-3.9569	-	-	-1.29542	Q9FH76|ABAH3_ARATH Abscisic acid 8'-hydroxylase 3 OS=Arabidopsis thaliana OX=3702 GN=CYP707A3 PE=1 SV=1 PF00067:Cytochrome P450	p450
BjuVA03G44670	-3.53267	-	-2.77374	-	Q9ZNS4|PRB1_ARATH Pathogenesis-related protein 1 OS=Arabidopsis thaliana OX=3702 GN=PRB1 PE=2 SV=1 PF00188:Cysteine-rich secretory protein family	SCP
BjuVA05G15460	3.50204	-	-1.64935	-	Q9ZW31|HS17B_ARATH 17.6 kDa class I heat shock protein 2 OS=Arabidopsis thaliana OX=3702 GN=HSP17.6B PE=2 SV=1 PF00011:Hsp20/alpha crystallin family	-
BjuVB06G16490	-2.60594	-	-	-	Q9FKW4|CDPKS_ARATH Calcium-dependent protein kinase 28 OS=Arabidopsis thaliana OX=3702 GN=CPK28 PE=1 SV=1 PF00069:Protein kinase domain	Pkinase
BjuVB05G32230	3.41557	-	-1.8062	-	P55737|HS902_ARATH Heat shock protein 90-2 OS=Arabidopsis thaliana OX=3702 GN=HSP90-2 PE=1 SV=1 PF02518:Histidine kinase-, DNA gyrase B-, and HSP90-like ATPase|PF00183:Hsp90 protein	HATPase_c
BjuVB02G56260	3.67532	-	-	-	Q9FJL3|FKB65_ARATH Peptidyl-prolyl cis-trans isomerase FKBP65 OS=Arabidopsis thaliana OX=3702 GN=FKBP65 PE=1 SV=1 PF00254:FKBP-type peptidyl-prolyl cis-trans isomerase	FKBP_C
BjuVA02G34620	-3.5273	-	-	-4.23338	Q9FH76|ABAH3_ARATH Abscisic acid 8'-hydroxylase 3 OS=Arabidopsis thaliana OX=3702 GN=CYP707A3 PE=1 SV=1 PF00067:Cytochrome P450	p450
BjuVA09G07260	2.39237	-	-	-	P29402|CALX1_ARATH Calnexin homolog 1 OS=Arabidopsis thaliana OX=3702 GN=CNX1 PE=1 SV=1 PF00262:Calreticulin family	-
BjuVB04G19870	-3.38615	-	1.10628	-	F4I594|RLM1A_ARATH Disease resistance protein RML1A OS=Arabidopsis thaliana OX=3702 GN=RLM1A PE=3 SV=1 PF01582:TIR domain|PF13499:EF-hand domain pair	TIR
BjuVB06G55410	-4.86688	-	-	-2.41782	Q9LY00|WRK70_ARATH Probable WRKY transcription factor 70 OS=Arabidopsis thaliana OX=3702 GN=WRKY70 PE=1 SV=1 PF03106:WRKY DNA -binding domain	WRKY
BjuVB05G46130	3.55994	-	-	-	Q9STH1|HSOP3_ARATH Hsp70-Hsp90 organizing protein 3 OS=Arabidopsis thaliana OX=3702 GN=HOP3 PE=2 SV=1 PF17830:STI1 domain|PF00515:Tetratricopeptide repeat|PF13414:TPR repeat	TPR_1
BjuVB06G34180	-2.43103	-	1.33457	-	Q7PC86|AB35G_ARATH ABC transporter G family member 35 OS=Arabidopsis thaliana OX=3702 GN=ABCG35 PE=2 SV=1 PF08370:Plant PDR ABC transporter associated|PF14510:ABC-transporter N-terminal|PF19055:ABC-2 type transporter|PF00005:ABC transporter|PF01061:ABC-2 type transporter	ABC2_membrane
BjuVB08G28590	-3.28386	-	1.42634	-1.33225	Q9ZPE7|EXO_ARATH Protein EXORDIUM OS=Arabidopsis thaliana OX=3702 GN=EXO PE=2 SV=1 PF04674:Phosphate-induced protein 1 conserved region	-
BjuVA07G11000	3.71698	-	-	-	Q9C7N4|GDL15_ARATH GDSL esterase/lipase At1g29670 OS=Arabidopsis thaliana OX=3702 GN=At1g29670 PE=2 SV=1 PF00657:GDSL-like Lipase/Acylhydrolase	Lipase_GDSL
BjuVB02G46700	2.35343	-	-2.34453	-	P22953|HS701_ARATH Heat shock 70 kDa protein 1 OS=Arabidopsis thaliana OX=3702 GN=HSP70-1 PE=1 SV=3 PF00012:Hsp70 protein	HSP70
BjuVB01G05810	3.50708	1.74019	1.61683	-	Q42641|NLTPA_BRAOT Non-specific lipid-transfer protein A OS=Brassica oleracea var. italica OX=36774 GN=WAX9A PE=3 SV=1 PF00234:Protease inhibitor/seed storage/LTP family	-
BjuVB04G35850	-2.97835	-	-	-1.12896	PF04601:Domain of unknown function (DUF569)	-
BjuVB05G29460	3.33923	-	1.28955	3.82493	Q04980|LTI65_ARATH Low-temperature-induced 65 kDa protein OS=Arabidopsis thaliana OX=3702 GN=LTI65 PE=2 SV=2 -	-
BjuVB04G11750	2.092	-	-	-	P22953|HS701_ARATH Heat shock 70 kDa protein 1 OS=Arabidopsis thaliana OX=3702 GN=HSP70-1 PE=1 SV=3 PF00012:Hsp70 protein	HSP70
BjuVB06G01150	-3.78308	-	-1.12044	-3.28985	Q9SKD9|WRK46_ARATH Probable WRKY transcription factor 46 OS=Arabidopsis thaliana OX=3702 GN=WRKY46 PE=1 SV=1 PF03106:WRKY DNA -binding domain	WRKY
BjuVA04G03850	-4.47841	-	-	-3.88498	Q9LDH1|SIB1_ARATH Sigma factor binding protein 1, chloroplastic OS=Arabidopsis thaliana OX=3702 GN=SIB1 PE=1 SV=1 PF05678:VQ motif	-
BjuVA05G44670	-2.59868	-	-	-	Q9SRH6|HIR3_ARATH Hypersensitive-induced response protein 3 OS=Arabidopsis thaliana OX=3702 GN=HIR3 PE=1 SV=1 PF01145:SPFH domain / Band 7 family	-
BjuVB08G14460	4.84689	4.8913	4.82419	3.35445	Q9LLR6|NLTP4_ARATH Non-specific lipid-transfer protein 4 OS=Arabidopsis thaliana OX=3702 GN=LTP4 PE=3 SV=1 PF00234:Protease inhibitor/seed storage/LTP family	-
BjuVA09G46860	-2.7425	-	-	-2.10544	Q6NLQ6|CDPKW_ARATH Calcium-dependent protein kinase 32 OS=Arabidopsis thaliana OX=3702 GN=CPK32 PE=1 SV=1 PF13499:EF-hand domain pair|PF00069:Protein kinase domain	Pkinase
BjuVA01G05290	-2.3438	-1.29961	-	-	Q39119|VPEG_ARATH Vacuolar-processing enzyme gamma-isozyme OS=Arabidopsis thaliana OX=3702 GN=At4g32940 PE=1 SV=2 PF01650:Peptidase C13 family	-
BjuVA07G17530	-2.94749	-	-	-1.58124	Q9LVR5|MCU3_ARATH Calcium uniporter protein 3, mitochondrial OS=Arabidopsis thaliana OX=3702 GN=At5g66650 PE=2 SV=1 PF04678:Mitochondrial calcium uniporter	-
BjuVA04G04090	-5.15838	-	-	-2.77817	Q9LY00|WRK70_ARATH Probable WRKY transcription factor 70 OS=Arabidopsis thaliana OX=3702 GN=WRKY70 PE=1 SV=1 PF03106:WRKY DNA -binding domain	WRKY
BjuVB08G15700	2.09321	-	-	-	Q39043|BIP2_ARATH Heat shock 70 kDa protein BIP2 OS=Arabidopsis thaliana OX=3702 GN=BIP2 PE=1 SV=2 PF00012:Hsp70 protein	HSP70
BjuVA07G07970	2.3586	-	-	-	Q39043|BIP2_ARATH Heat shock 70 kDa protein BIP2 OS=Arabidopsis thaliana OX=3702 GN=BIP2 PE=1 SV=2 PF00012:Hsp70 protein	HSP70
BjuVB05G04050	-2.76125	-	-	-	Q25AG5|ERG3_ORYSI Elicitor-responsive protein 3 OS=Oryza sativa subsp. indica OX=39946 GN=ERG3 PE=2 SV=1 PF01585:G-patch domain|PF00168:C2 domain	C2
BjuVA06G10890	-2.1338	-	-	-	Q7PC86|AB35G_ARATH ABC transporter G family member 35 OS=Arabidopsis thaliana OX=3702 GN=ABCG35 PE=2 SV=1 PF08370:Plant PDR ABC transporter associated|PF19055:ABC-2 type transporter|PF14510:ABC-transporter N-terminal|PF00005:ABC transporter|PF01061:ABC-2 type transporter	ABC2_membrane
BjuVA05G39630	3.30391	-	-	-	PF04632:Fusaric acid resistance protein family	-
BjuVB02G39050	-2.52276	-	-	-	Q8S9J6|ASPA_ARATH Aspartyl protease family protein At5g10770 OS=Arabidopsis thaliana OX=3702 GN=At5g10770 PE=2 SV=1 PF00026:Eukaryotic aspartyl protease	Asp
BjuVA10G33690	2.00548	-	-1.02333	-	P22954|HS702_ARATH Heat shock 70 kDa protein 2 OS=Arabidopsis thaliana OX=3702 GN=HSP70-2 PE=1 SV=2 PF00012:Hsp70 protein	HSP70
BjuVA03G29600	-3.39063	-	-	-2.03544	Q9S9T6|FB220_ARATH F-box protein At4g05010 OS=Arabidopsis thaliana OX=3702 GN=At4g05010 PE=2 SV=1 -	-
BjuVA07G23170	-3.10957	-	-	-1.67819	Q9LY00|WRK70_ARATH Probable WRKY transcription factor 70 OS=Arabidopsis thaliana OX=3702 GN=WRKY70 PE=1 SV=1 PF03106:WRKY DNA -binding domain	WRKY
BjuVA03G02500	-2.68879	-	-	-1.93877	Q9FNH6|NHL3_ARATH NDR1/HIN1-like protein 3 OS=Arabidopsis thaliana OX=3702 GN=NHL3 PE=1 SV=1 PF03168:Late embryogenesis abundant protein	-
BjuVA09G42360	-2.80281	-	-	-	Q8GWK5|GASA9_ARATH Gibberellin-regulated protein 9 OS=Arabidopsis thaliana OX=3702 GN=GASA9 PE=3 SV=1 PF02704:Gibberellin regulated protein	-
BjuVB07G15330	2.31035	-	-1.581	-	P22953|HS701_ARATH Heat shock 70 kDa protein 1 OS=Arabidopsis thaliana OX=3702 GN=HSP70-1 PE=1 SV=3 PF00012:Hsp70 protein	HSP70
BjuVB01G14700	-3.31175	-	-	-	Q9ZVD2|NHL13_ARATH NDR1/HIN1-like protein 13 OS=Arabidopsis thaliana OX=3702 GN=NHL13 PE=2 SV=1 PF03168:Late embryogenesis abundant protein	-
BjuVA09G07310	2.1007	-	-1.42097	-	P22954|HS702_ARATH Heat shock 70 kDa protein 2 OS=Arabidopsis thaliana OX=3702 GN=HSP70-2 PE=1 SV=2 PF00012:Hsp70 protein	HSP70
BjuVA03G25670	3.06881	-	-	1.94879	P46421|GSTU5_ARATH Glutathione S-transferase U5 OS=Arabidopsis thaliana OX=3702 GN=GSTU5 PE=2 SV=1 PF02798:Glutathione S-transferase, N-terminal domain	GST_N
BjuVB08G35910	-2.21669	-	-	1.3266	Q9M126|NAC69_ARATH NAC domain-containing protein 69 OS=Arabidopsis thaliana OX=3702 GN=NAC69 PE=1 SV=1 PF02365:No apical meristem (NAM) protein	NAM
BjuVA09G05850	-3.72305	-	-	-	PF04862:Protein of unknown function (DUF642)	-
BjuVB07G19850	2.1545	-	-1.30032	-2.38991	O65727|ERG11_BRANA Squalene monooxygenase 1,1 OS=Brassica napus OX=3708 GN=SQP1,1 PE=2 SV=1 PF08491:Squalene epoxidase|PF13450:NAD(P)-binding Rossmann-like domain	-
BjuVA09G40600	2.18411	-	-2.0686	-	Q9LDR9|EXP10_ARATH Expansin-A10 OS=Arabidopsis thaliana OX=3702 GN=EXPA10 PE=2 SV=1 PF03330:Lytic transglycolase|PF01357:Expansin C-terminal domain	-
BjuVB04G17530	1.99814	-	-	-	O04151|CALR1_ARATH Calreticulin-1 OS=Arabidopsis thaliana OX=3702 GN=CRT1 PE=1 SV=1 PF00262:Calreticulin family	-
BjuVB04G11860	1.98127	-	-	-	P22953|HS701_ARATH Heat shock 70 kDa protein 1 OS=Arabidopsis thaliana OX=3702 GN=HSP70-1 PE=1 SV=3 PF00012:Hsp70 protein	HSP70
BjuVB04G02450	2.13253	-	-	-	P29402|CALX1_ARATH Calnexin homolog 1 OS=Arabidopsis thaliana OX=3702 GN=CNX1 PE=1 SV=1 PF00262:Calreticulin family	-
BjuVA05G14680	2.22696	-	-	-	P92994|TCMO_ARATH Trans-cinnamate 4-monooxygenase OS=Arabidopsis thaliana OX=3702 GN=CYP73A5 PE=1 SV=1 PF00067:Cytochrome P450	p450
BjuVB01G29010	2.62978	-	-	-	Q39043|BIP2_ARATH Heat shock 70 kDa protein BIP2 OS=Arabidopsis thaliana OX=3702 GN=BIP2 PE=1 SV=2 PF00012:Hsp70 protein	HSP70
BjuVB06G32930	-2.84523	-	-1.7717	-2.40129	Q6R8G7|PHO13_ARATH Phosphate transporter PHO1 homolog 3 OS=Arabidopsis thaliana OX=3702 GN=PHO1;H3 PE=2 SV=2 PF03105:SPX domain|PF03124:EXS family	SPX
BjuVA10G34110	-2.41405	-	-	-	Q9LFC6|FRB1_ARATH Protein FRIABLE 1 OS=Arabidopsis thaliana OX=3702 GN=FRB1 PE=2 SV=1 PF10250:GDP-fucose protein O-fucosyltransferase	-
BjuVA01G16500	-3.14824	-	1.14893	-2.49606	Q9SB52|PUMP4_ARATH Mitochondrial uncoupling protein 4 OS=Arabidopsis thaliana OX=3702 GN=PUMP4 PE=2 SV=1 PF00153:Mitochondrial carrier protein	Mito_carr
BjuVB05G05040	-2.27207	-1.1361	-	-	Q39119|VPEG_ARATH Vacuolar-processing enzyme gamma-isozyme OS=Arabidopsis thaliana OX=3702 GN=At4g32940 PE=1 SV=2 PF01650:Peptidase C13 family	-
BjuVA09G40880	-2.63086	-	-	-1.73884	PF04601:Domain of unknown function (DUF569)	-
BjuVB05G53440	-2.63777	-	-	-	Q9CAR7|HIR2_ARATH Hypersensitive-induced response protein 2 OS=Arabidopsis thaliana OX=3702 GN=HIR2 PE=1 SV=1 PF01145:SPFH domain / Band 7 family	-
BjuVB05G11850	3.49823	-	-	-	Q96331|HS23M_ARATH 23.6 kDa heat shock protein, mitochondrial OS=Arabidopsis thaliana OX=3702 GN=HSP23.6 PE=2 SV=1 PF00011:Hsp20/alpha crystallin family	-
BjuVB08G11860	1.84431	-	-	-	P55737|HS902_ARATH Heat shock protein 90-2 OS=Arabidopsis thaliana OX=3702 GN=HSP90-2 PE=1 SV=1 PF02518:Histidine kinase-, DNA gyrase B-, and HSP90-like ATPase|PF00183:Hsp90 protein	HATPase_c
BjuVA09G19190	2.0749	-	-	-	O04151|CALR1_ARATH Calreticulin-1 OS=Arabidopsis thaliana OX=3702 GN=CRT1 PE=1 SV=1 PF00262:Calreticulin family	-
BjuVB04G23780	2.54042	-	1.45095	1.7821	Q8RWT0|LUP2_ARATH Amyrin synthase LUP2 OS=Arabidopsis thaliana OX=3702 GN=LUP2 PE=1 SV=1 PF13249:Squalene-hopene cyclase N-terminal domain|PF13243:Squalene-hopene cyclase C-terminal domain	-
BjuVB07G15980	-1.91105	-	-	-	Q9FKW4|CDPKS_ARATH Calcium-dependent protein kinase 28 OS=Arabidopsis thaliana OX=3702 GN=CPK28 PE=1 SV=1 PF13499:EF-hand domain pair|PF00069:Protein kinase domain	Pkinase
BjuVB04G19310	-3.23507	-	-	-2.34104	Q9CAK1|RLM1B_ARATH Disease resistance protein RML1B OS=Arabidopsis thaliana OX=3702 GN=RLM1B PE=2 SV=1 PF13499:EF-hand domain pair|PF01582:TIR domain	TIR
BjuVB03G47080	-2.72112	-	-	-	Q9CAK4|ROH1_ARATH Protein ROH1 OS=Arabidopsis thaliana OX=3702 GN=ROH1 PE=1 SV=1 PF05633:Protein BYPASS1-related	-
BjuVA03G00970	3.43864	-	-	-	-	-
BjuVB05G12890	2.0168	-	-	-	Q9STX5|ENPL_ARATH Endoplasmin homolog OS=Arabidopsis thaliana OX=3702 GN=HSP90-7 PE=1 SV=1 PF02518:Histidine kinase-, DNA gyrase B-, and HSP90-like ATPase|PF00183:Hsp90 protein	HATPase_c
BjuVB08G17220	-2.64263	-	-	-1.79508	PF12043:Domain of unknown function (DUF3527)	-
BjuVB08G19360	2.07886	-	-	-	Q39043|BIP2_ARATH Heat shock 70 kDa protein BIP2 OS=Arabidopsis thaliana OX=3702 GN=BIP2 PE=1 SV=2 PF00012:Hsp70 protein	HSP70
BjuVB06G44180	2.42016	4.24477	4.51741	4.96554	P38418|LOX2_ARATH Lipoxygenase 2, chloroplastic OS=Arabidopsis thaliana OX=3702 GN=LOX2 PE=1 SV=1 PF00305:Lipoxygenase	Lipoxygenase
BjuVA09G10080	-1.86229	-	-	-	Q9FKW4|CDPKS_ARATH Calcium-dependent protein kinase 28 OS=Arabidopsis thaliana OX=3702 GN=CPK28 PE=1 SV=1 PF00069:Protein kinase domain|PF13499:EF-hand domain pair	Pkinase
BjuVB04G27060	2.0289	-	-	1.39768	Q9FUS8|GSTUH_ARATH Glutathione S-transferase U17 OS=Arabidopsis thaliana OX=3702 GN=GSTU17 PE=2 SV=1 PF02798:Glutathione S-transferase, N-terminal domain|PF00043:Glutathione S-transferase, C-terminal domain	GST_N
BjuVA04G29320	3.8369	3.82753	3.48121	-	Q42642|NLTPB_BRAOT Non-specific lipid-transfer protein B OS=Brassica oleracea var. italica OX=36774 GN=WAX9B PE=3 SV=1 PF00234:Protease inhibitor/seed storage/LTP family	-
BjuVB02G15770	-2.43018	-	-	-	Q8S8Q6|TET8_ARATH Tetraspanin-8 OS=Arabidopsis thaliana OX=3702 GN=TET8 PE=2 SV=1 PF00335:Tetraspanin family	Tetraspannin
BjuVB02G64600	2.77531	-	-	-	Q08298|RD22_ARATH BURP domain protein RD22 OS=Arabidopsis thaliana OX=3702 GN=RD22 PE=2 SV=1 PF03181:BURP domain	-
BjuVA03G11770	3.38072	-	-3.01907	-	Q9LLR7|NLTP3_ARATH Non-specific lipid-transfer protein 3 OS=Arabidopsis thaliana OX=3702 GN=LTP3 PE=3 SV=1 PF00234:Protease inhibitor/seed storage/LTP family	-
BjuVA07G36750	-2.47887	-	-	-	O04536|GATL9_ARATH Probable galacturonosyltransferase-like 9 OS=Arabidopsis thaliana OX=3702 GN=GATL9 PE=2 SV=1 PF01501:Glycosyl transferase family 8	Glyco_transf_8
BjuVB06G13320	-2.16686	-	-1.12145	-1.51163	-	-
BjuVA09G23280	-3.17546	-	-	-2.0533	-	-
BjuVB01G04250	-3.15993	-	-	-	Q93WU8|WRK54_ARATH Probable WRKY transcription factor 54 OS=Arabidopsis thaliana OX=3702 GN=WRKY54 PE=1 SV=2 PF03106:WRKY DNA -binding domain	WRKY
BjuVA01G38670	-2.66615	-	-	-	Q9LIB6|COBL8_ARATH COBRA-like protein 8 OS=Arabidopsis thaliana OX=3702 GN=COBL8 PE=2 SV=1 PF04833:COBRA-like protein	-
BjuVB06G17120	-1.8008	-	-	-	PF03107:C1 domain	-
BjuVB03G03020	2.72051	-	1.32808	-	PF04398:Protein of unknown function, DUF538	-
BjuVA05G36590	1.77046	-	-	-1.21865	Q9LK62|AB7C_ARATH ABC transporter C family member 7 OS=Arabidopsis thaliana OX=3702 GN=ABCC7 PE=1 SV=1 PF06426:Serine acetyltransferase, N-terminal|PF00132:Bacterial transferase hexapeptide (six repeats)|PF00664:ABC transporter transmembrane region|PF00005:ABC transporter	ABC_tran
BjuVB01G18330	-2.37653	-	-	-1.4212	Q9SJY5|PUMP5_ARATH Mitochondrial uncoupling protein 5 OS=Arabidopsis thaliana OX=3702 GN=PUMP5 PE=2 SV=1 PF00153:Mitochondrial carrier protein	Mito_carr
BjuVB08G25760	2.05537	-	-1.34069	-	P46421|GSTU5_ARATH Glutathione S-transferase U5 OS=Arabidopsis thaliana OX=3702 GN=GSTU5 PE=2 SV=1 PF13417:Glutathione S-transferase, N-terminal domain	-
BjuVA09G62210	2.361	-	-	-	Q9M9S6|UTR3_ARATH UDP-galactose/UDP-glucose transporter 3 OS=Arabidopsis thaliana OX=3702 GN=UTR3 PE=1 SV=1 PF08449:UAA transporter family	-
BjuVB02G64730	-2.60223	-	-	-2.24161	P47735|RLK5_ARATH Receptor-like protein kinase 5 OS=Arabidopsis thaliana OX=3702 GN=RLK5 PE=1 SV=1 PF08263:Leucine rich repeat N-terminal domain|PF13855:Leucine rich repeat|PF00069:Protein kinase domain	Pkinase
BjuVA03G27750	-3.34614	-	2.28074	-	Q9ZPE7|EXO_ARATH Protein EXORDIUM OS=Arabidopsis thaliana OX=3702 GN=EXO PE=2 SV=1 PF04674:Phosphate-induced protein 1 conserved region	-
BjuVB08G55260	-2.2937	-	1.01575	-1.56729	Q9LY00|WRK70_ARATH Probable WRKY transcription factor 70 OS=Arabidopsis thaliana OX=3702 GN=WRKY70 PE=1 SV=1 PF03106:WRKY DNA -binding domain	WRKY
BjuVB08G24960	-5.73102	-	-	-2.98696	Q9SKD9|WRK46_ARATH Probable WRKY transcription factor 46 OS=Arabidopsis thaliana OX=3702 GN=WRKY46 PE=1 SV=1 PF03106:WRKY DNA -binding domain	WRKY
BjuVB02G34800	-1.74382	-	-	-	Q93V51|PSE1_ARATH Protein LEAD-SENSITIVE 1 OS=Arabidopsis thaliana OX=3702 GN=PSE1 PE=2 SV=1 PF04970:Lecithin retinol acyltransferase	-
BjuVB04G01270	-2.78766	-	-	-1.39692	-	-
BjuVB01G04040	-2.96017	-	-	-2.69657	O80683|CAB25_ARATH Calmodulin-binding protein 25 OS=Arabidopsis thaliana OX=3702 GN=CAMBP25 PE=1 SV=1 PF05678:VQ motif	-
BjuVB02G59650	1.81631	-	-	-	F4JMJ1|HSP7R_ARATH Heat shock 70 kDa protein 17 OS=Arabidopsis thaliana OX=3702 GN=HSP70-17 PE=2 SV=1 PF00012:Hsp70 protein	HSP70
BjuVB04G05990	-1.89381	-	1.09621	-	Q9FIJ0|RBOHD_ARATH Respiratory burst oxidase homolog protein D OS=Arabidopsis thaliana OX=3702 GN=RBOHD PE=1 SV=1 PF08414:Respiratory burst NADPH oxidase|PF01794:Ferric reductase like transmembrane component|PF08030:Ferric reductase NAD binding domain|PF08022:FAD-binding domain	FAD_binding_8
BjuVB07G23310	-3.39751	-	-	-1.91502	Q9LHD2|GATLA_ARATH Probable galacturonosyltransferase-like 10 OS=Arabidopsis thaliana OX=3702 GN=GATL10 PE=2 SV=1 PF01501:Glycosyl transferase family 8	Glyco_transf_8
BjuVA04G08700	1.6669	-	-	1.24339	O23255|SAHH1_ARATH Adenosylhomocysteinase 1 OS=Arabidopsis thaliana OX=3702 GN=SAHH1 PE=1 SV=1 PF05221:S-adenosyl-L-homocysteine hydrolase|PF00670:S-adenosyl-L-homocysteine hydrolase, NAD binding domain	-
BjuVA07G17890	-2.24652	-	-	-	Q9FKW4|CDPKS_ARATH Calcium-dependent protein kinase 28 OS=Arabidopsis thaliana OX=3702 GN=CPK28 PE=1 SV=1 PF13499:EF-hand domain pair|PF00069:Protein kinase domain	Pkinase
BjuVA04G28090	1.94531	-	-	-	Q9SJL8|METK3_ARATH S-adenosylmethionine synthase 3 OS=Arabidopsis thaliana OX=3702 GN=METK3 PE=1 SV=1 PF02773:S-adenosylmethionine synthetase, C-terminal domain|PF02772:S-adenosylmethionine synthetase, central domain|PF00438:S-adenosylmethionine synthetase, N-terminal domain	-
BjuVB08G55500	-2.841	-	-	-	Q9LDH1|SIB1_ARATH Sigma factor binding protein 1, chloroplastic OS=Arabidopsis thaliana OX=3702 GN=SIB1 PE=1 SV=1 PF05678:VQ motif	-
BjuVB07G18830	1.84801	-	-	-	P29402|CALX1_ARATH Calnexin homolog 1 OS=Arabidopsis thaliana OX=3702 GN=CNX1 PE=1 SV=1 PF00262:Calreticulin family	-
BjuVA08G21410	-2.35066	-	1.26218	1.51787	F4JTB3|DTX35_ARATH Protein DETOXIFICATION 35 OS=Arabidopsis thaliana OX=3702 GN=DTX35 PE=1 SV=1 PF01554:MatE	MatE
BjuVB08G15430	2.35032	-	-	-	P92994|TCMO_ARATH Trans-cinnamate 4-monooxygenase OS=Arabidopsis thaliana OX=3702 GN=CYP73A5 PE=1 SV=1 PF00067:Cytochrome P450	p450
BjuVA03G43420	1.8433	-	-	-	Q38931|FKB62_ARATH Peptidyl-prolyl cis-trans isomerase FKBP62 OS=Arabidopsis thaliana OX=3702 GN=FKBP62 PE=1 SV=2 PF00515:Tetratricopeptide repeat|PF00254:FKBP-type peptidyl-prolyl cis-trans isomerase	FKBP_C
BjuVA03G63340	-2.68185	-	1.32186	1.84533	F4JNX2|SDEH4_ARATH Senescence/dehydration-associated protein At4g35985, chloroplastic OS=Arabidopsis thaliana OX=3702 GN=P85 PE=2 SV=1 PF06911:Senescence-associated protein	-
BjuVB04G23100	-1.86937	-	-1.85667	-2.51284	PF03107:C1 domain	-
BjuVB08G45700	-2.04446	-	-	-	Q39023|MPK3_ARATH Mitogen-activated protein kinase 3 OS=Arabidopsis thaliana OX=3702 GN=MPK3 PE=1 SV=2 PF00069:Protein kinase domain	Pkinase
BjuV_Contig00683G00490	2.41782	-	1.37832	1.555	Q9FT51|AB27G_ARATH ABC transporter G family member 27 OS=Arabidopsis thaliana OX=3702 GN=ABCG27 PE=2 SV=1 PF19055:ABC-2 type transporter|PF01061:ABC-2 type transporter|PF00005:ABC transporter	ABC2_membrane
BjuVA04G31040	-2.83084	-	-	-	Q93WU8|WRK54_ARATH Probable WRKY transcription factor 54 OS=Arabidopsis thaliana OX=3702 GN=WRKY54 PE=1 SV=2 PF03106:WRKY DNA -binding domain	WRKY
BjuVB02G07010	2.16404	-	-	-	Q9M9S6|UTR3_ARATH UDP-galactose/UDP-glucose transporter 3 OS=Arabidopsis thaliana OX=3702 GN=UTR3 PE=1 SV=1 PF08449:UAA transporter family	-
BjuVB06G07050	1.59601	-	-	-	Q43304|NLTPD_BRAOT Non-specific lipid-transfer protein D OS=Brassica oleracea var. italica OX=36774 GN=WAX9D PE=3 SV=1 PF00234:Protease inhibitor/seed storage/LTP family	-
BjuVB02G40360	2.94433	2.46816	-	5.97535	-	-
BjuVB02G73020	-2.57983	-	-	-2.91968	Q25AG5|ERG3_ORYSI Elicitor-responsive protein 3 OS=Oryza sativa subsp. indica OX=39946 GN=ERG3 PE=2 SV=1 PF00168:C2 domain	C2
BjuVB04G05820	-1.63189	-	-	-1.40709	Q9C699|RLP7_ARATH Receptor-like protein 7 OS=Arabidopsis thaliana OX=3702 GN=RLP7 PE=3 SV=2 PF08263:Leucine rich repeat N-terminal domain|PF13855:Leucine rich repeat	LRRNT_2
BjuVA09G59580	-2.73412	-	-	-	Q9CAK4|ROH1_ARATH Protein ROH1 OS=Arabidopsis thaliana OX=3702 GN=ROH1 PE=1 SV=1 PF05633:Protein BYPASS1-related	-
BjuVA09G05860	-2.43383	-	-	-	Q9SII6|PIX13_ARATH Probable serine/threonine-protein kinase PIX13 OS=Arabidopsis thaliana OX=3702 GN=PIX13 PE=1 SV=2 PF07714:Protein tyrosine and serine/threonine kinase	Pkinase_Tyr
BjuVA02G10250	-2.89077	-	-	-1.65498	Q9FMS6|CAF1K_ARATH Probable CCR4-associated factor 1 homolog 11 OS=Arabidopsis thaliana OX=3702 GN=CAF1-11 PE=2 SV=1 PF04857:CAF1 family ribonuclease	CAF1
BjuVB03G30870	2.00774	-	-1.8269	-	Q9C7N4|GDL15_ARATH GDSL esterase/lipase At1g29670 OS=Arabidopsis thaliana OX=3702 GN=At1g29670 PE=2 SV=1 PF00657:GDSL-like Lipase/Acylhydrolase	Lipase_GDSL
BjuVA02G33530	-2.37172	-	-	-1.32475	Q9FG87|KCS20_ARATH 3-ketoacyl-CoA synthase 20 OS=Arabidopsis thaliana OX=3702 GN=KCS20 PE=2 SV=1 PF08541:3-Oxoacyl-[acyl-carrier-protein (ACP)] synthase III C terminal|PF08392:FAE1/Type III polyketide synthase-like protein	-
BjuVA09G02830	-2.83714	-	-	-	Q9LSD8|MUB4_ARATH Membrane-anchored ubiquitin-fold protein 4 OS=Arabidopsis thaliana OX=3702 GN=MUB4 PE=1 SV=1 PF13881:Ubiquitin-2 like Rad60 SUMO-like	-
BjuVA04G28910	-2.10026	-	-	-	Q9SH93|IPCS2_ARATH Phosphatidylinositol:ceramide inositolphosphotransferase 2 OS=Arabidopsis thaliana OX=3702 GN=IPCS2 PE=1 SV=1 PF14360:PAP2 superfamily C-terminal	-
BjuVA06G43050	-2.51639	-	-	-	Q9ZU50|BAT1_ARATH Amino-acid permease BAT1 OS=Arabidopsis thaliana OX=3702 GN=BAT1 PE=2 SV=2 PF13520:Amino acid permease	-
BjuVA09G40420	2.127	-	-	-	P22953|HS701_ARATH Heat shock 70 kDa protein 1 OS=Arabidopsis thaliana OX=3702 GN=HSP70-1 PE=1 SV=3 PF00012:Hsp70 protein	HSP70
BjuVA09G57350	-1.9827	-	-	-1.48126	Q9SJY5|PUMP5_ARATH Mitochondrial uncoupling protein 5 OS=Arabidopsis thaliana OX=3702 GN=PUMP5 PE=2 SV=1 PF00153:Mitochondrial carrier protein	Mito_carr
BjuVB06G16080	-2.9202	-	1.05212	-2.54645	B3H4P1|PP450_ARATH Pentatricopeptide repeat-containing protein At5g66631 OS=Arabidopsis thaliana OX=3702 GN=At5g66631 PE=2 SV=1 PF13041:PPR repeat family|PF04678:Mitochondrial calcium uniporter	-
BjuVA06G21190	-1.81966	-	1.12981	-	Q39023|MPK3_ARATH Mitogen-activated protein kinase 3 OS=Arabidopsis thaliana OX=3702 GN=MPK3 PE=1 SV=2 PF00069:Protein kinase domain	Pkinase
BjuVB01G45350	2.19999	-	-1.35268	-	F4JFN3|HS906_ARATH Heat shock protein 90-6, mitochondrial OS=Arabidopsis thaliana OX=3702 GN=HSP90-6 PE=1 SV=1 PF02518:Histidine kinase-, DNA gyrase B-, and HSP90-like ATPase|PF00183:Hsp90 protein	HATPase_c
BjuVA03G16780	2.4	-	-	-	P92994|TCMO_ARATH Trans-cinnamate 4-monooxygenase OS=Arabidopsis thaliana OX=3702 GN=CYP73A5 PE=1 SV=1 PF00067:Cytochrome P450	p450
BjuVB04G34310	-2.27333	-	-1.8171	-	Q8GWK5|GASA9_ARATH Gibberellin-regulated protein 9 OS=Arabidopsis thaliana OX=3702 GN=GASA9 PE=3 SV=1 PF02704:Gibberellin regulated protein	-
BjuVA07G44760	-1.88104	-	-	-	Q9SAH7|WRK40_ARATH Probable WRKY transcription factor 40 OS=Arabidopsis thaliana OX=3702 GN=WRKY40 PE=1 SV=1 PF03106:WRKY DNA -binding domain	WRKY
BjuVA02G02270	1.9592	-	1.29242	-1.41316	Q93YS4|AB22G_ARATH ABC transporter G family member 22 OS=Arabidopsis thaliana OX=3702 GN=ABCG22 PE=1 SV=1 PF00005:ABC transporter|PF01061:ABC-2 type transporter	ABC2_membrane
BjuVA03G13500	1.64664	-	-	-	P55737|HS902_ARATH Heat shock protein 90-2 OS=Arabidopsis thaliana OX=3702 GN=HSP90-2 PE=1 SV=1 PF00183:Hsp90 protein|PF02518:Histidine kinase-, DNA gyrase B-, and HSP90-like ATPase	HATPase_c
BjuVB04G30020	-1.87442	-	-	-	Q9LE22|CML27_ARATH Probable calcium-binding protein CML27 OS=Arabidopsis thaliana OX=3702 GN=CML27 PE=1 SV=1 PF13499:EF-hand domain pair	-
BjuVB02G03140	-2.30781	-	-	-	O04023|SRC2_ARATH Protein SRC2 homolog OS=Arabidopsis thaliana OX=3702 GN=SRC2 PE=1 SV=1 PF00168:C2 domain	C2
BjuVB01G09560	-2.05946	-	-	-1.71915	O22808|LYK5_ARATH Protein LYK5 OS=Arabidopsis thaliana OX=3702 GN=LYK5 PE=2 SV=1 PF00069:Protein kinase domain	Pkinase
BjuV_Contig00683G00560	-2.36241	-	-	-	Q9S745|PAD4_ARATH Lipase-like PAD4 OS=Arabidopsis thaliana OX=3702 GN=PAD4 PE=1 SV=1 PF01764:Lipase (class 3)|PF18117:Enhanced disease susceptibility 1 protein EP domain	Lipase_3
BjuVA03G20080	2.28742	2.44283	2.64468	2.90119	P43287|PIP22_ARATH Aquaporin PIP2-2 OS=Arabidopsis thaliana OX=3702 GN=PIP2-2 PE=1 SV=2 PF00230:Major intrinsic protein	-
BjuVB06G47130	-2.58701	-	-	-	-	-
BjuVA03G06140	1.80678	-	1.95159	-	PF06813:Nodulin-like	-
BjuVB02G50910	-2.17453	-	-	-2.03516	Q9ZU49|LPP1_ARATH Lipid phosphate phosphatase 1 OS=Arabidopsis thaliana OX=3702 GN=LPP1 PE=2 SV=2 PF01569:PAP2 superfamily	-
BjuVA01G16080	1.67869	-	-	-	Q9STX5|ENPL_ARATH Endoplasmin homolog OS=Arabidopsis thaliana OX=3702 GN=HSP90-7 PE=1 SV=1 PF02518:Histidine kinase-, DNA gyrase B-, and HSP90-like ATPase|PF00183:Hsp90 protein	HATPase_c
BjuVB03G08830	2.10396	-	-	-	Q8L9J7|SWET1_ARATH Bidirectional sugar transporter SWEET1 OS=Arabidopsis thaliana OX=3702 GN=SWEET1 PE=1 SV=1 PF03083:Sugar efflux transporter for intercellular exchange	-
BjuVB05G10030	-2.3712	-	-	-2.56364	O81831|CARP1_ARATH Calcium-binding protein KRP1 OS=Arabidopsis thaliana OX=3702 GN=KRP1 PE=2 SV=1 PF13833:EF-hand domain pair	-
BjuVA09G39220	-2.77319	-	-	-	-	-
BjuVA10G19220	2.68694	-	-	3.55008	Q8LPL3|ASO_ARATH L-ascorbate oxidase OS=Arabidopsis thaliana OX=3702 GN=AAO PE=1 SV=1 PF00394:Multicopper oxidase|PF07732:Multicopper oxidase|PF07731:Multicopper oxidase	-
BjuVB06G48030	-3.19298	-	-	-	Q9LY00|WRK70_ARATH Probable WRKY transcription factor 70 OS=Arabidopsis thaliana OX=3702 GN=WRKY70 PE=1 SV=1 PF03106:WRKY DNA -binding domain	WRKY
BjuVA02G46900	1.72284	-	-	-	P29402|CALX1_ARATH Calnexin homolog 1 OS=Arabidopsis thaliana OX=3702 GN=CNX1 PE=1 SV=1 PF00262:Calreticulin family	-
BjuVA04G03730	-2.42682	-	-	-2.04632	O80683|CAB25_ARATH Calmodulin-binding protein 25 OS=Arabidopsis thaliana OX=3702 GN=CAMBP25 PE=1 SV=1 PF05678:VQ motif	-
BjuVB08G35270	-2.6996	-	-	-1.69323	O04609|WRK22_ARATH WRKY transcription factor 22 OS=Arabidopsis thaliana OX=3702 GN=WRKY22 PE=2 SV=1 PF03106:WRKY DNA -binding domain	WRKY
BjuVA06G28280	-1.78283	-	-	-	C0SVV6|CB60A_ARATH Calmodulin-binding protein 60 A OS=Arabidopsis thaliana OX=3702 GN=CBP60A PE=2 SV=1 PF07887:Calmodulin binding protein-like	-
BjuVB07G14710	-2.04301	-	-	-1.56546	Q9XIE0|FH7_ARATH Formin-like protein 7 OS=Arabidopsis thaliana OX=3702 GN=FH7 PE=2 SV=1 PF02181:Formin Homology 2 Domain	FH2
BjuVB07G15550	1.64888	-	-	-	O04151|CALR1_ARATH Calreticulin-1 OS=Arabidopsis thaliana OX=3702 GN=CRT1 PE=1 SV=1 PF00262:Calreticulin family	-
BjuVB05G33440	-2.66098	-	1.40447	-	Q38857|XTH22_ARATH Xyloglucan endotransglucosylase/hydrolase protein 22 OS=Arabidopsis thaliana OX=3702 GN=XTH22 PE=1 SV=1 PF06955:Xyloglucan endo-transglycosylase (XET) C-terminus|PF00722:Glycosyl hydrolases family 16	-
BjuV_Contig00875G00030	-2.401	-	-	-2.52122	Q9SR87|LRK61_ARATH Probable L-type lectin-domain containing receptor kinase VI.1 OS=Arabidopsis thaliana OX=3702 GN=LECRK61 PE=2 SV=1 PF00139:Legume lectin domain|PF00069:Protein kinase domain	Pkinase
BjuVB06G07100	-2.85024	-	-	-2.40638	Q8S8P5|WRK33_ARATH Probable WRKY transcription factor 33 OS=Arabidopsis thaliana OX=3702 GN=WRKY33 PE=1 SV=2 PF03106:WRKY DNA -binding domain	WRKY
BjuVA07G30390	-1.64383	-	-2.50397	-1.52738	P46271|GLP1_BRANA Germin-like protein 1 OS=Brassica napus OX=3708 GN=GER1 PE=2 SV=1 PF00190:Cupin	-
BjuVA09G54480	1.81579	-	-	-	Q9LZK5|DNJ19_ARATH DnaJ protein ERDJ3B OS=Arabidopsis thaliana OX=3702 GN=ERDJ3B PE=1 SV=1 PF01556:DnaJ C terminal domain|PF00226:DnaJ domain	DnaJ_C
BjuVB03G01900	-2.24427	-	-	-	-	-
BjuVA03G26070	-2.37458	-	-	-	Q9ZQG9|E1314_ARATH Glucan endo-1,3-beta-glucosidase 14 OS=Arabidopsis thaliana OX=3702 GN=At2g27500 PE=2 SV=2 PF00332:Glycosyl hydrolases family 17	Glyco_hydro_17
BjuVA03G13230	1.53044	-	-1.01597	-	P55737|HS902_ARATH Heat shock protein 90-2 OS=Arabidopsis thaliana OX=3702 GN=HSP90-2 PE=1 SV=1 PF02518:Histidine kinase-, DNA gyrase B-, and HSP90-like ATPase|PF00183:Hsp90 protein	HATPase_c
BjuVA06G34200	2.11124	2.22825	-	2.86127	Q8LEV7|6PGL5_ARATH Probable 6-phosphogluconolactonase 5 OS=Arabidopsis thaliana OX=3702 GN=PGL5 PE=2 SV=2 PF01182:Glucosamine-6-phosphate isomerases/6-phosphogluconolactonase	-
BjuVB04G13150	-2.71304	-	-	-2.34145	Q9LI84|CML16_ARATH Probable calcium-binding protein CML16 OS=Arabidopsis thaliana OX=3702 GN=CML16 PE=2 SV=2 PF13499:EF-hand domain pair	-
BjuVB02G34030	2.47014	-3.63158	-4.32158	-3.93683	F4KGY6|RVE1_ARATH Protein REVEILLE 1 OS=Arabidopsis thaliana OX=3702 GN=RVE1 PE=1 SV=1 PF00249:Myb-like DNA-binding domain	Myb_DNA-binding
BjuVA02G04510	-3.08455	1.02461	1.08377	-	-	-
BjuVA05G02340	-2.77856	-	-	-2.16375	Q9SS43|MUC21_ARATH Xylan glycosyltransferase MUCI21 OS=Arabidopsis thaliana OX=3702 GN=MUCI21 PE=1 SV=1 PF04577:Protein of unknown function (DUF563)	-
BjuVA04G12100	-2.34355	-	-	-	Q9FID8|Y5900_ARATH Putative receptor-like protein kinase At5g39000 OS=Arabidopsis thaliana OX=3702 GN=At5g39000 PE=3 SV=1 PF07714:Protein tyrosine and serine/threonine kinase|PF12819:Malectin-like domain	Pkinase_Tyr
BjuVB03G43280	-2.26771	-	-	-1.68091	C0LGH3|Y5614_ARATH Probable LRR receptor-like serine/threonine-protein kinase At1g56140 OS=Arabidopsis thaliana OX=3702 GN=At1g56140 PE=2 SV=2 PF07714:Protein tyrosine and serine/threonine kinase	Pkinase_Tyr
BjuVA03G22040	-2.14073	-	-	-2.39664	O04203|HSPR2_ARATH Nematode resistance protein-like HSPRO2 OS=Arabidopsis thaliana OX=3702 GN=HSPRO2 PE=1 SV=1 PF07014:Hs1pro-1 protein C-terminus|PF07231:Hs1pro-1 N-terminus	-
BjuVB02G67440	1.71587	-	-	-	Q9STX5|ENPL_ARATH Endoplasmin homolog OS=Arabidopsis thaliana OX=3702 GN=HSP90-7 PE=1 SV=1 PF00183:Hsp90 protein|PF02518:Histidine kinase-, DNA gyrase B-, and HSP90-like ATPase	HATPase_c
BjuVB08G35550	1.9219	-	-1.32055	-	Q9ZPJ8|AMT12_ARATH Ammonium transporter 1 member 2 OS=Arabidopsis thaliana OX=3702 GN=AMT1-2 PE=1 SV=1 PF00909:Ammonium Transporter Family	Ammonium_transp
BjuVB06G48570	2.68405	-	-	-	Q8VX13|PDI13_ARATH Protein disulfide isomerase-like 1-3 OS=Arabidopsis thaliana OX=3702 GN=PDIL1-3 PE=2 SV=1 PF13848:Thioredoxin-like domain|PF00085:Thioredoxin	-
BjuVA03G13550	1.55776	-	-	-	P55737|HS902_ARATH Heat shock protein 90-2 OS=Arabidopsis thaliana OX=3702 GN=HSP90-2 PE=1 SV=1 PF02518:Histidine kinase-, DNA gyrase B-, and HSP90-like ATPase|PF00183:Hsp90 protein	HATPase_c
BjuVB08G21380	-2.17632	-	-	-2.45927	O04203|HSPR2_ARATH Nematode resistance protein-like HSPRO2 OS=Arabidopsis thaliana OX=3702 GN=HSPRO2 PE=1 SV=1 PF07231:Hs1pro-1 N-terminus|PF07014:Hs1pro-1 protein C-terminus	-
BjuVA07G36590	-1.84453	-	-	-	Q6NMS0|GSTUC_ARATH Glutathione S-transferase U12 OS=Arabidopsis thaliana OX=3702 GN=GSTU12 PE=2 SV=2 PF13417:Glutathione S-transferase, N-terminal domain	-
BjuVB06G06020	-2.18839	-	-	-1.34955	O04203|HSPR2_ARATH Nematode resistance protein-like HSPRO2 OS=Arabidopsis thaliana OX=3702 GN=HSPRO2 PE=1 SV=1 PF07014:Hs1pro-1 protein C-terminus|PF07231:Hs1pro-1 N-terminus	-
BjuV_Contig00580_ERROPOS930405+G00310	-2.21801	-	-	-	PF05050:Methyltransferase FkbM domain	-
BjuVB02G45740	-2.55829	-	-	-	Q9LFC6|FRB1_ARATH Protein FRIABLE 1 OS=Arabidopsis thaliana OX=3702 GN=FRB1 PE=2 SV=1 PF10250:GDP-fucose protein O-fucosyltransferase	-
BjuVB03G01890	-2.88869	-	-	-1.52738	-	-
BjuVA07G07930	-2.04893	-	-	-	Q9LV48|PERK1_ARATH Proline-rich receptor-like protein kinase PERK1 OS=Arabidopsis thaliana OX=3702 GN=PERK1 PE=1 SV=1 PF07714:Protein tyrosine and serine/threonine kinase	Pkinase_Tyr
BjuVA03G49450	1.56556	-	-	-	F4JMJ1|HSP7R_ARATH Heat shock 70 kDa protein 17 OS=Arabidopsis thaliana OX=3702 GN=HSP70-17 PE=2 SV=1 PF00012:Hsp70 protein	HSP70
BjuVB06G55190	-1.76103	-	-	-1.47541	O80683|CAB25_ARATH Calmodulin-binding protein 25 OS=Arabidopsis thaliana OX=3702 GN=CAMBP25 PE=1 SV=1 PF05678:VQ motif	-
BjuVB08G56360	-1.96806	-	-	-	Q6NLQ6|CDPKW_ARATH Calcium-dependent protein kinase 32 OS=Arabidopsis thaliana OX=3702 GN=CPK32 PE=1 SV=1 PF13499:EF-hand domain pair|PF00069:Protein kinase domain	Pkinase
BjuVA06G15770	-2.00029	-	-	-	-	-
BjuVB08G02120	-2.04819	-	-	-1.744	Q9FTA2|TCP21_ARATH Transcription factor TCP21 OS=Arabidopsis thaliana OX=3702 GN=TCP21 PE=1 SV=1 PF03634:TCP family transcription factor	TCP
BjuVA03G61520	-2.57501	-	1.08856	-	O81760|P2C63_ARATH Probable protein phosphatase 2C 63 OS=Arabidopsis thaliana OX=3702 GN=At4g33920 PE=2 SV=1 PF00481:Protein phosphatase 2C	PP2C
BjuVA01G04340	-2.08267	-	-	-	Q25AG5|ERG3_ORYSI Elicitor-responsive protein 3 OS=Oryza sativa subsp. indica OX=39946 GN=ERG3 PE=2 SV=1 PF00168:C2 domain|PF01585:G-patch domain|PF17780:OCRE domain	C2
BjuVB03G16760	1.77159	-	-	-	Q9C7F7|LTPG1_ARATH Non-specific lipid transfer protein GPI-anchored 1 OS=Arabidopsis thaliana OX=3702 GN=LTPG1 PE=2 SV=1 PF14368:Probable lipid transfer	-
BjuVA02G21300	-2.40446	-	1.41789	-	Q9CAR7|HIR2_ARATH Hypersensitive-induced response protein 2 OS=Arabidopsis thaliana OX=3702 GN=HIR2 PE=1 SV=1 PF01145:SPFH domain / Band 7 family	-
BjuVA05G04540	-2.96864	-	1.70487	-	A0A0B5GR44|OFT20_BRANA O-fucosyltransferase 20 OS=Brassica napus OX=3708 GN=OFUT20 PE=2 SV=2 PF10250:GDP-fucose protein O-fucosyltransferase	-
BjuVA10G12250	-2.72064	-	-	-2.78883	O81831|CARP1_ARATH Calcium-binding protein KRP1 OS=Arabidopsis thaliana OX=3702 GN=KRP1 PE=2 SV=1 PF13833:EF-hand domain pair	-
BjuVA04G02980	-2.17001	-	-	-	-	-
BjuVA06G35220	1.81847	-	-	-	Q08298|RD22_ARATH BURP domain protein RD22 OS=Arabidopsis thaliana OX=3702 GN=RD22 PE=2 SV=1 PF03181:BURP domain	-
BjuVB02G72900	-2.4672	-	-	-	O81760|P2C63_ARATH Probable protein phosphatase 2C 63 OS=Arabidopsis thaliana OX=3702 GN=At4g33920 PE=2 SV=1 PF00481:Protein phosphatase 2C	PP2C
BjuVA10G02710	-2.49571	-	-1.07303	-	P93824|ACCH6_ARATH 1-aminocyclopropane-1-carboxylate oxidase homolog 6 OS=Arabidopsis thaliana OX=3702 GN=At1g04350 PE=2 SV=1 PF14226:non-haem dioxygenase in morphine synthesis N-terminal|PF03171:2OG-Fe(II) oxygenase superfamily	2OG-FeII_Oxy
BjuVA06G13230	-2.24317	-	-	-2.90085	Q9FZ59|PEPR2_ARATH Leucine-rich repeat receptor-like protein kinase PEPR2 OS=Arabidopsis thaliana OX=3702 GN=PEPR2 PE=1 SV=1 PF00069:Protein kinase domain|PF08263:Leucine rich repeat N-terminal domain|PF13855:Leucine rich repeat	Pkinase
BjuVB01G06180	-1.81574	1.11282	1.21047	1.3138	Q9SH93|IPCS2_ARATH Phosphatidylinositol:ceramide inositolphosphotransferase 2 OS=Arabidopsis thaliana OX=3702 GN=IPCS2 PE=1 SV=1 PF14360:PAP2 superfamily C-terminal	-
BjuVA02G45160	2.40905	-	-	-	Q08298|RD22_ARATH BURP domain protein RD22 OS=Arabidopsis thaliana OX=3702 GN=RD22 PE=2 SV=1 PF03181:BURP domain	-
BjuVB02G45340	1.5583	-	-	-	P22954|HS702_ARATH Heat shock 70 kDa protein 2 OS=Arabidopsis thaliana OX=3702 GN=HSP70-2 PE=1 SV=2 PF00012:Hsp70 protein	HSP70
BjuVB02G13280	-3.46025	-	1.56581	2.04094	Q8GYX8|DNJ10_ARATH Chaperone protein dnaJ 10 OS=Arabidopsis thaliana OX=3702 GN=ATJ10 PE=2 SV=2 PF14308:X-domain of DnaJ-containing|PF00226:DnaJ domain	DnaJ
BjuVB08G05030	-1.5452	-	-	1.13947	Q4F883|SG101_ARATH Senescence-associated carboxylesterase 101 OS=Arabidopsis thaliana OX=3702 GN=SAG101 PE=1 SV=1 PF01764:Lipase (class 3)|PF18117:Enhanced disease susceptibility 1 protein EP domain	Lipase_3
BjuVA03G40980	-1.56084	-	-	-	Q38868|CDPK9_ARATH Calcium-dependent protein kinase 9 OS=Arabidopsis thaliana OX=3702 GN=CPK9 PE=1 SV=1 PF13499:EF-hand domain pair|PF00069:Protein kinase domain	Pkinase
BjuVB07G04830	-4.12375	-	-	1.62141	Q9SF24|LOR10_ARATH Protein LURP-one-related 10 OS=Arabidopsis thaliana OX=3702 GN=At3g11740 PE=2 SV=2 PF04525:LURP-one-related	-
BjuVB08G22830	2.44076	-	-	-	Q42512|CR15A_ARATH Protein COLD-REGULATED 15A, chloroplastic OS=Arabidopsis thaliana OX=3702 GN=COR15A PE=1 SV=1 -	-
BjuVB06G26580	3.86482	5.06079	5.50834	5.84489	Q9SE50|BGL18_ARATH Beta-D-glucopyranosyl abscisate beta-glucosidase OS=Arabidopsis thaliana OX=3702 GN=BGLU18 PE=1 SV=2 PF00232:Glycosyl hydrolase family 1	Glyco_hydro_1
BjuVB02G55460	-3.92632	-	-	1.48652	Q9LIA8|UGDH2_ARATH UDP-glucose 6-dehydrogenase 2 OS=Arabidopsis thaliana OX=3702 GN=UGD2 PE=1 SV=1 PF00984:UDP-glucose/GDP-mannose dehydrogenase family, central domain|PF03720:UDP-glucose/GDP-mannose dehydrogenase family, UDP binding domain|PF03721:UDP-glucose/GDP-mannose dehydrogenase family, NAD binding domain	-
BjuVA10G22360	2.30356	-4.20061	-5.48532	-7.03986	F4KGY6|RVE1_ARATH Protein REVEILLE 1 OS=Arabidopsis thaliana OX=3702 GN=RVE1 PE=1 SV=1 PF00249:Myb-like DNA-binding domain	Myb_DNA-binding
BjuVB06G10110	2.27922	2.27408	3.48344	4.50021	O64745|BBE16_ARATH Berberine bridge enzyme-like 16 OS=Arabidopsis thaliana OX=3702 GN=At2g34810 PE=2 SV=1 PF08031:Berberine and berberine like|PF01565:FAD binding domain	FAD_binding_4
BjuVA03G26780	-2.33973	-	-	-1.18558	Q8S8Q6|TET8_ARATH Tetraspanin-8 OS=Arabidopsis thaliana OX=3702 GN=TET8 PE=2 SV=1 PF00335:Tetraspanin family	Tetraspannin
BjuVB02G04460	-1.66971	-	-	-	Q9SXB6|MLO2_ARATH MLO-like protein 2 OS=Arabidopsis thaliana OX=3702 GN=MLO2 PE=1 SV=1 PF03094:Mlo family	-
BjuVB03G46020	1.7334	1.49594	1.87225	1.19804	Q9FX28|KTI3_ARATH Kunitz trypsin inhibitor 3 OS=Arabidopsis thaliana OX=3702 GN=KTI3 PE=2 SV=1 PF00197:Trypsin and protease inhibitor	-
BjuVB01G32700	1.76796	-1.3424	-	-1.71088	Q9LVE0|PTR33_ARATH Protein NRT1/ PTR FAMILY 6.4 OS=Arabidopsis thaliana OX=3702 GN=NPF6.4 PE=1 SV=1 PF00854:POT family	-
BjuVB02G44950	2.12059	-	-	-	Q9LYW9|DNJ36_ARATH DnaJ protein P58IPK homolog OS=Arabidopsis thaliana OX=3702 GN=P58IPK PE=1 SV=1 PF00226:DnaJ domain	DnaJ
BjuVB02G42440	-1.8713	-	-	-	Q9FNH6|NHL3_ARATH NDR1/HIN1-like protein 3 OS=Arabidopsis thaliana OX=3702 GN=NHL3 PE=1 SV=1 PF03168:Late embryogenesis abundant protein	-
BjuVA05G29850	-2.37613	-	-	-1.72924	Q9SSW2|AZF2_ARATH Zinc finger protein AZF2 OS=Arabidopsis thaliana OX=3702 GN=AZF2 PE=2 SV=1 PF13912:C2H2-type zinc finger	-
BjuVA01G02570	1.80096	-	-2.18411	-2.18663	Q42600|C84A1_ARATH Cytochrome P450 84A1 OS=Arabidopsis thaliana OX=3702 GN=CYP84A1 PE=1 SV=1 PF00067:Cytochrome P450	p450
BjuVB04G07250	-2.60002	-	-	-	Q9LK32|Y3721_ARATH Uncharacterized protein At3g27210 OS=Arabidopsis thaliana OX=3702 GN=Y-2 PE=1 SV=1 -	-
BjuVB06G49380	3.33129	-	-	-	P45724|PAL2_ARATH Phenylalanine ammonia-lyase 2 OS=Arabidopsis thaliana OX=3702 GN=PAL2 PE=1 SV=2 PF00221:Aromatic amino acid lyase	-
BjuVB06G32410	-1.89366	1.33996	1.32124	2.76469	O82567|AAPT1_ARATH Choline/ethanolaminephosphotransferase 1 OS=Arabidopsis thaliana OX=3702 GN=AAPT1 PE=1 SV=1 PF01066:CDP-alcohol phosphatidyltransferase	CDP-OH_P_transf
BjuVA09G42630	1.64465	-	-	-	P27608|AROF_TOBAC Phospho-2-dehydro-3-deoxyheptonate aldolase 1, chloroplastic OS=Nicotiana tabacum OX=4097 GN=DHAPS-1 PE=2 SV=1 PF01474:Class-II DAHP synthetase family	-
BjuVA03G65090	2.1334	1.98174	1.98774	2.40827	O49196|APK2_ARATH Adenylyl-sulfate kinase 2, chloroplastic OS=Arabidopsis thaliana OX=3702 GN=APK2 PE=1 SV=1 PF01583:Adenylylsulphate kinase	-
BjuVA09G64240	-1.61342	1.17085	1.29009	-	Q9SXB6|MLO2_ARATH MLO-like protein 2 OS=Arabidopsis thaliana OX=3702 GN=MLO2 PE=1 SV=1 PF03094:Mlo family	-
BjuVA01G15450	2.68887	2.80718	4.74257	4.76605	Q9SUR6|CORI3_ARATH Cystine lyase CORI3 OS=Arabidopsis thaliana OX=3702 GN=CORI3 PE=1 SV=1 PF00155:Aminotransferase class I and II	Aminotran_1_2
BjuVB08G54240	-1.77755	-	1.19119	-	P52409|E13B_WHEAT Glucan endo-1,3-beta-glucosidase OS=Triticum aestivum OX=4565 GN=GLC1 PE=2 SV=1 PF00332:Glycosyl hydrolases family 17|PF07983:X8 domain	Glyco_hydro_17
BjuVA09G23230	-2.04181	-	-	-	Q9ZU49|LPP1_ARATH Lipid phosphate phosphatase 1 OS=Arabidopsis thaliana OX=3702 GN=LPP1 PE=2 SV=2 PF01569:PAP2 superfamily	-
BjuVB02G74880	2.18085	-	1.41816	-	Q9SZE8|LBD39_ARATH LOB domain-containing protein 39 OS=Arabidopsis thaliana OX=3702 GN=LBD39 PE=2 SV=1 PF03195:Lateral organ boundaries (LOB) domain	-
BjuVA06G27160	1.56904	-	-	-	P29402|CALX1_ARATH Calnexin homolog 1 OS=Arabidopsis thaliana OX=3702 GN=CNX1 PE=1 SV=1 PF00262:Calreticulin family	-
BjuVB03G16800	-1.56355	-	-	-	Q37145|ACA1_ARATH Calcium-transporting ATPase 1 OS=Arabidopsis thaliana OX=3702 GN=ACA1 PE=1 SV=3 PF00122:E1-E2 ATPase|PF12515:Ca2+-ATPase N terminal autoinhibitory domain|PF13246:Cation transport ATPase (P-type)|PF00690:Cation transporter/ATPase, N-terminus	E1-E2_ATPase
BjuVB02G14270	-2.08919	-	-	-1.66413	Q9SJY5|PUMP5_ARATH Mitochondrial uncoupling protein 5 OS=Arabidopsis thaliana OX=3702 GN=PUMP5 PE=2 SV=1 PF00153:Mitochondrial carrier protein	Mito_carr
BjuVA03G45860	-2.30387	-	-	-	-	-
BjuVA06G05540	1.54981	-	-	-	Q38858|CALR2_ARATH Calreticulin-2 OS=Arabidopsis thaliana OX=3702 GN=CRT2 PE=1 SV=3 PF00262:Calreticulin family	-
BjuVA07G42920	1.53849	-	-	-	Q9SRG3|PDI12_ARATH Protein disulfide isomerase-like 1-2 OS=Arabidopsis thaliana OX=3702 GN=PDIL1-2 PE=2 SV=1 PF00085:Thioredoxin|PF13848:Thioredoxin-like domain	-
BjuVA02G10560	1.66023	1.30914	-	1.37477	Q56WH4|HDT2_ARATH Histone deacetylase HDT2 OS=Arabidopsis thaliana OX=3702 GN=HDT2 PE=1 SV=2 PF17800:Nucleoplasmin-like domain	-
BjuVB08G27290	-2.27332	-	-	-1.64455	Q8S8Q6|TET8_ARATH Tetraspanin-8 OS=Arabidopsis thaliana OX=3702 GN=TET8 PE=2 SV=1 PF00335:Tetraspanin family	Tetraspannin
BjuVA07G36600	-2.29997	-	-	-	Q9CAS6|GSTUB_ARATH Glutathione S-transferase U11 OS=Arabidopsis thaliana OX=3702 GN=GSTU11 PE=2 SV=1 PF13417:Glutathione S-transferase, N-terminal domain	-
BjuVA04G25850	-1.53825	-	-	-	O22808|LYK5_ARATH Protein LYK5 OS=Arabidopsis thaliana OX=3702 GN=LYK5 PE=2 SV=1 PF00069:Protein kinase domain	Pkinase
BjuVA06G21990	-2.04964	-	-	-3.41801	Q9LXM2|CAF1I_ARATH Probable CCR4-associated factor 1 homolog 9 OS=Arabidopsis thaliana OX=3702 GN=CAF1-9 PE=2 SV=1 PF04857:CAF1 family ribonuclease	CAF1
BjuVB03G19400	1.4685	-	-	-	O49499|CAMT4_ARATH Caffeoyl-CoA O-methyltransferase 1 OS=Arabidopsis thaliana OX=3702 GN=CCOAOMT1 PE=1 SV=1 PF01596:O-methyltransferase	-
BjuVA05G34830	2.11775	-	-1.80518	-1.74943	Q9LH79|SWET2_ARATH Bidirectional sugar transporter SWEET2 OS=Arabidopsis thaliana OX=3702 GN=SWEET2 PE=1 SV=1 PF03083:Sugar efflux transporter for intercellular exchange	-
BjuVB08G12840	3.05351	-	1.67009	2.23244	-	-
BjuVB07G12400	2.67307	-	-	-	-	-
BjuVA09G27370	-1.93047	-	-	-2.52137	Q9SAR0|1A16_ARATH 1-aminocyclopropane-1-carboxylate synthase 6 OS=Arabidopsis thaliana OX=3702 GN=ACS6 PE=1 SV=2 PF00155:Aminotransferase class I and II	Aminotran_1_2
BjuVA09G65410	-1.84836	-	-	-	O04023|SRC2_ARATH Protein SRC2 homolog OS=Arabidopsis thaliana OX=3702 GN=SRC2 PE=1 SV=1 PF00168:C2 domain	C2
BjuVB02G74550	-1.82767	-1.01281	-1.37929	-1.23061	P26320|PSBO_SOLTU Oxygen-evolving enhancer protein 1, chloroplastic OS=Solanum tuberosum OX=4113 GN=PSBO PE=2 SV=1 PF01716:Manganese-stabilising protein / photosystem II polypeptide	-
BjuVB01G07250	2.09235	-	-	-	Q9SJQ9|ALFC6_ARATH Fructose-bisphosphate aldolase 6, cytosolic OS=Arabidopsis thaliana OX=3702 GN=FBA6 PE=1 SV=1 PF00274:Fructose-bisphosphate aldolase class-I	-
BjuVA02G07070	-1.45229	-	-2.21423	-	Q9FMD9|GLN14_ARATH Glutamine synthetase cytosolic isozyme 1-4 OS=Arabidopsis thaliana OX=3702 GN=GLN1-4 PE=1 SV=1 PF00120:Glutamine synthetase, catalytic domain|PF03951:Glutamine synthetase, beta-Grasp domain	-
BjuVA04G07390	2.15689	-	1.28835	-	Q9FT51|AB27G_ARATH ABC transporter G family member 27 OS=Arabidopsis thaliana OX=3702 GN=ABCG27 PE=2 SV=1 PF19055:ABC-2 type transporter|PF00005:ABC transporter|PF01061:ABC-2 type transporter	ABC2_membrane
BjuVA01G14900	-1.38737	-	-	-	Q8GYA4|CRK10_ARATH Cysteine-rich receptor-like protein kinase 10 OS=Arabidopsis thaliana OX=3702 GN=CRK10 PE=1 SV=3 PF01657:Salt stress response/antifungal|PF07714:Protein tyrosine and serine/threonine kinase	Pkinase_Tyr
BjuVB03G50750	1.88308	-	-	-	Q9Y7K5|YGI3_SCHPO Uncharacterized WD repeat-containing protein C2A9.03 OS=Schizosaccharomyces pombe (strain 972 / ATCC 24843) OX=284812 GN=SPBC2A9.03 PE=4 SV=2 PF00400:WD domain, G-beta repeat	WD40
BjuVB02G07630	1.63026	-	-	-	Q38931|FKB62_ARATH Peptidyl-prolyl cis-trans isomerase FKBP62 OS=Arabidopsis thaliana OX=3702 GN=FKBP62 PE=1 SV=2 PF00254:FKBP-type peptidyl-prolyl cis-trans isomerase|PF00515:Tetratricopeptide repeat	FKBP_C
BjuVA09G37360	-3.44633	-	-	-	Q9LMM6|BPS1_ARATH Protein BPS1, chloroplastic OS=Arabidopsis thaliana OX=3702 GN=BPS1 PE=2 SV=1 -	-
BjuVB08G44720	-2.24638	-	-	-2.92428	Q9LXM2|CAF1I_ARATH Probable CCR4-associated factor 1 homolog 9 OS=Arabidopsis thaliana OX=3702 GN=CAF1-9 PE=2 SV=1 PF04857:CAF1 family ribonuclease	CAF1
BjuV_Contig00458G00090	1.79102	-	-	-	Q9LZK5|DNJ19_ARATH DnaJ protein ERDJ3B OS=Arabidopsis thaliana OX=3702 GN=ERDJ3B PE=1 SV=1 PF01556:DnaJ C terminal domain|PF00226:DnaJ domain	DnaJ_C
BjuVA03G18320	-2.69302	-	-	-	PF12043:Domain of unknown function (DUF3527)	-
BjuVA09G51230	-1.77778	-	-	-	Q9SJM6|SAP4_ARATH Zinc finger A20 and AN1 domain-containing stress-associated protein 4 OS=Arabidopsis thaliana OX=3702 GN=SAP4 PE=1 SV=1 PF01754:A20-like zinc finger|PF01428:AN1-like Zinc finger	zf-AN1
BjuVA03G23850	2.52966	-	-	-	O22841|CHI62_ARATH Endochitinase At2g43620 OS=Arabidopsis thaliana OX=3702 GN=At2g43620 PE=3 SV=1 PF00187:Chitin recognition protein|PF00182:Chitinase class I	-
BjuVB01G24500	-1.48991	-	-	-	Q8VYG0|LRL13_ARATH LEAF RUST 10 DISEASE-RESISTANCE LOCUS RECEPTOR-LIKE PROTEIN KINASE-like 1.3 OS=Arabidopsis thaliana OX=3702 GN=LRK10L-1.3 PE=2 SV=1 PF13947:Wall-associated receptor kinase galacturonan-binding|PF07714:Protein tyrosine and serine/threonine kinase|PF14380:Wall-associated receptor kinase C-terminal	Pkinase_Tyr
BjuVB07G35010	-1.6334	-	-	-1.16282	Q9M0M5|SCL13_ARATH Scarecrow-like protein 13 OS=Arabidopsis thaliana OX=3702 GN=SCL13 PE=2 SV=2 PF03514:GRAS domain family	GRAS
BjuVB05G59980	-2.1362	-	-	-	Q9SAH7|WRK40_ARATH Probable WRKY transcription factor 40 OS=Arabidopsis thaliana OX=3702 GN=WRKY40 PE=1 SV=1 PF03106:WRKY DNA -binding domain	WRKY
BjuVB06G51510	-1.80667	-	1.13536	-	Q9FPH0|XB34_ARATH Putative E3 ubiquitin-protein ligase XBAT34 OS=Arabidopsis thaliana OX=3702 GN=XBAT34 PE=2 SV=1 PF13920:Zinc finger, C3HC4 type (RING finger)	-
BjuVB06G13270	-1.84144	-	1.52041	1.27905	Q9FE06|EXOL2_ARATH Protein EXORDIUM-like 2 OS=Arabidopsis thaliana OX=3702 GN=EXL2 PE=2 SV=1 PF04674:Phosphate-induced protein 1 conserved region	-
BjuVA03G39630	-1.50953	-	-	-	Q9LD37|CNG20_ARATH Probable cyclic nucleotide-gated ion channel 20, chloroplastic OS=Arabidopsis thaliana OX=3702 GN=CNGC20 PE=2 SV=1 PF00520:Ion transport protein	Ion_trans
BjuVA01G29220	2.49362	1.94972	2.77457	2.09626	Q9S762|HIS1A_ARATH ATP phosphoribosyltransferase 1, chloroplastic OS=Arabidopsis thaliana OX=3702 GN=HISN1A PE=1 SV=1 PF08029:HisG, C-terminal domain|PF01634:ATP phosphoribosyltransferase	-
BjuVA03G36560	-1.74323	-	-	-	Q9ZSD4|SY121_ARATH Syntaxin-121 OS=Arabidopsis thaliana OX=3702 GN=SYP121 PE=1 SV=1 PF00804:Syntaxin|PF05739:SNARE domain	SNARE
BjuVA07G37950	-2.00242	-	-	-	Q9M9H6|CK1_ARATH Probable choline kinase 1 OS=Arabidopsis thaliana OX=3702 GN=CK1 PE=2 SV=1 PF01633:Choline/ethanolamine kinase	Choline_kinase
BjuVB07G40770	1.91806	-	-	-	Q5M7D4|CNPY1_XENLA Protein canopy homolog 1 OS=Xenopus laevis OX=8355 GN=cnpy1 PE=2 SV=1 PF11938:TLR4 regulator and MIR-interacting MSAP	-
BjuVB04G40090	1.76261	-	-	-	Q6AYK6|CYBP_RAT Calcyclin-binding protein OS=Rattus norvegicus OX=10116 GN=Cacybp PE=1 SV=1 PF09032:Siah interacting protein, N terminal|PF04969:CS domain	-
BjuVA05G36910	-2.97706	-	-	-	P05100|3MG1_ECOLI DNA-3-methyladenine glycosylase 1 OS=Escherichia coli (strain K12) OX=83333 GN=tag PE=1 SV=1 PF03352:Methyladenine glycosylase	-
BjuVA09G56600	-2.1236	-	-	-1.52974	Q8S8Q6|TET8_ARATH Tetraspanin-8 OS=Arabidopsis thaliana OX=3702 GN=TET8 PE=2 SV=1 PF00335:Tetraspanin family	Tetraspannin
BjuVA07G37300	-2.45874	-	-	-	Q9C5S9|CRK6_ARATH Cysteine-rich receptor-like protein kinase 6 OS=Arabidopsis thaliana OX=3702 GN=CRK6 PE=1 SV=1 PF07714:Protein tyrosine and serine/threonine kinase	Pkinase_Tyr
BjuVB05G07260	2.66002	-	-	-	-	-
BjuVB06G55240	-4.21971	-	-	-	Q9LDH1|SIB1_ARATH Sigma factor binding protein 1, chloroplastic OS=Arabidopsis thaliana OX=3702 GN=SIB1 PE=1 SV=1 PF05678:VQ motif	-
BjuVA03G02190	5.03529	5.87306	6.79356	8.63206	Q9FFF6|JOX2_ARATH Jasmonate-induced oxygenase 2 OS=Arabidopsis thaliana OX=3702 GN=JOX2 PE=1 SV=1 PF03171:2OG-Fe(II) oxygenase superfamily|PF14226:non-haem dioxygenase in morphine synthesis N-terminal	2OG-FeII_Oxy
BjuVB04G35290	-1.8791	-	-	-2.35377	PF07816:Protein of unknown function (DUF1645)	-
BjuVB07G32560	-1.82193	-	-	-	Q9ZSD4|SY121_ARATH Syntaxin-121 OS=Arabidopsis thaliana OX=3702 GN=SYP121 PE=1 SV=1 PF00804:Syntaxin|PF05739:SNARE domain	SNARE
BjuVB01G41400	1.42654	-	-1.03976	-	Q9LK62|AB7C_ARATH ABC transporter C family member 7 OS=Arabidopsis thaliana OX=3702 GN=ABCC7 PE=1 SV=1 PF00132:Bacterial transferase hexapeptide (six repeats)|PF06426:Serine acetyltransferase, N-terminal|PF00005:ABC transporter|PF00664:ABC transporter transmembrane region	ABC_tran
BjuVA06G20080	1.85941	-	-	-	Q9C5L3|GLPT1_ARATH Putative glycerol-3-phosphate transporter 1 OS=Arabidopsis thaliana OX=3702 GN=At3g47420 PE=2 SV=1 PF07690:Major Facilitator Superfamily	MFS_1
BjuVA10G01090	-2.9479	-	-	-	Q9FZ21|G2OX6_ARATH Gibberellin 2-beta-dioxygenase 6 OS=Arabidopsis thaliana OX=3702 GN=GA2OX6 PE=2 SV=1 PF03171:2OG-Fe(II) oxygenase superfamily|PF14226:non-haem dioxygenase in morphine synthesis N-terminal	2OG-FeII_Oxy
BjuVB08G00610	3.81684	-	-	-	-	-
BjuVB05G14760	1.7043	-	-1.99245	-	P92980|APR3_ARATH 5'-adenylylsulfate reductase 3, chloroplastic OS=Arabidopsis thaliana OX=3702 GN=APR3 PE=2 SV=2 PF00085:Thioredoxin|PF01507:Phosphoadenosine phosphosulfate reductase family	-
BjuVA06G13830	-2.46423	-	-	-2.1793	Q9LE73|NUDT4_ARATH Nudix hydrolase 4 OS=Arabidopsis thaliana OX=3702 GN=NUDT4 PE=1 SV=1 PF00293:NUDIX domain	NUDIX
BjuVB01G44830	3.05744	-	-	-	Q9SR96|DNJ63_ARATH DnaJ protein ERDJ3A OS=Arabidopsis thaliana OX=3702 GN=ERDJ3A PE=1 SV=1 PF13848:Thioredoxin-like domain|PF00226:DnaJ domain	DnaJ
BjuVB08G30970	-1.6467	-	-	-1.54186	Q9SYS3|CRK40_ARATH Cysteine-rich receptor-like protein kinase 40 OS=Arabidopsis thaliana OX=3702 GN=CRK40 PE=2 SV=1 PF00069:Protein kinase domain|PF01657:Salt stress response/antifungal	Pkinase
BjuVB04G36110	1.76184	-	-3.32275	-	Q9LDR9|EXP10_ARATH Expansin-A10 OS=Arabidopsis thaliana OX=3702 GN=EXPA10 PE=2 SV=1 PF03330:Lytic transglycolase|PF01357:Expansin C-terminal domain	-
BjuVA07G18500	-1.66944	-	-	-	PF03107:C1 domain	-
BjuVB03G02950	1.68391	-	-	-	Q38858|CALR2_ARATH Calreticulin-2 OS=Arabidopsis thaliana OX=3702 GN=CRT2 PE=1 SV=3 PF00262:Calreticulin family	-
BjuVB04G36270	1.91645	-	-	-	P22953|HS701_ARATH Heat shock 70 kDa protein 1 OS=Arabidopsis thaliana OX=3702 GN=HSP70-1 PE=1 SV=3 PF00012:Hsp70 protein	HSP70
BjuVA03G31560	-2.13509	-	-	-1.65952	Q9SGI8|CML40_ARATH Probable calcium-binding protein CML40 OS=Arabidopsis thaliana OX=3702 GN=CML40 PE=2 SV=1 PF13833:EF-hand domain pair	-
BjuVB08G13030	1.73239	-	-	-	Q9FK25|OMT1_ARATH Flavone 3'-O-methyltransferase 1 OS=Arabidopsis thaliana OX=3702 GN=OMT1 PE=1 SV=1 PF00891:O-methyltransferase domain|PF08100:Dimerisation domain	-
BjuVB01G28980	2.30709	-	-	-	Q9LV58|MBF1C_ARATH Multiprotein-bridging factor 1c OS=Arabidopsis thaliana OX=3702 GN=MBF1C PE=1 SV=1 PF08523:Multiprotein bridging factor 1|PF01381:Helix-turn-helix	HTH_3
BjuVB01G26270	-1.89065	1.66958	1.48708	1.25321	Q9FKH6|B561P_ARATH Cytochrome b561 and DOMON domain-containing protein At5g35735 OS=Arabidopsis thaliana OX=3702 GN=At5g35735 PE=2 SV=1 PF03188:Eukaryotic cytochrome b561|PF04526:Protein of unknown function (DUF568)	Cytochrom_B561
BjuVB06G47380	-2.05918	-	1.36806	-	Q6NLQ6|CDPKW_ARATH Calcium-dependent protein kinase 32 OS=Arabidopsis thaliana OX=3702 GN=CPK32 PE=1 SV=1 PF00069:Protein kinase domain|PF13499:EF-hand domain pair	Pkinase
BjuVB07G35880	-1.94346	-	-	-	Q944H0|PEAM2_ARATH Phosphomethylethanolamine N-methyltransferase OS=Arabidopsis thaliana OX=3702 GN=NMT2 PE=1 SV=2 -	-
BjuVB05G42790	-1.57438	-	-	1.4238	Q9SU72|EDS1C_ARATH Protein EDS1 OS=Arabidopsis thaliana OX=3702 GN=EDS1 PE=1 SV=1 PF01764:Lipase (class 3)|PF18117:Enhanced disease susceptibility 1 protein EP domain	Lipase_3
BjuVB02G62780	-2.08148	-	-	-	-	-
BjuVB04G07790	-1.57118	-	-	-	Q9LTM1|C71BM_ARATH Cytochrome P450 71B22 OS=Arabidopsis thaliana OX=3702 GN=CYP71B22 PE=2 SV=1 PF00067:Cytochrome P450	p450
BjuVB04G01780	-1.61721	-	-	-	Q9FGW5|CDKG1_ARATH Cyclin-dependent kinase G1 OS=Arabidopsis thaliana OX=3702 GN=CDKG1 PE=1 SV=1 PF00069:Protein kinase domain	Pkinase
BjuVB01G33410	-2.54777	-	-	-3.47542	Q9LJB7|BBX32_ARATH B-box zinc finger protein 32 OS=Arabidopsis thaliana OX=3702 GN=BBX32 PE=1 SV=1 -	-
BjuVB06G02030	-2.94608	-	-	-	Q9SS43|MUC21_ARATH Xylan glycosyltransferase MUCI21 OS=Arabidopsis thaliana OX=3702 GN=MUCI21 PE=1 SV=1 PF04577:Protein of unknown function (DUF563)	-
BjuVA01G13820	1.53731	1.55707	-	-	P92980|APR3_ARATH 5'-adenylylsulfate reductase 3, chloroplastic OS=Arabidopsis thaliana OX=3702 GN=APR3 PE=2 SV=2 PF00085:Thioredoxin|PF01507:Phosphoadenosine phosphosulfate reductase family	-
BjuVA05G08660	1.75394	-	-1.30785	-1.59571	P35510|PAL1_ARATH Phenylalanine ammonia-lyase 1 OS=Arabidopsis thaliana OX=3702 GN=PAL1 PE=1 SV=3 PF00221:Aromatic amino acid lyase	-
BjuVB08G12110	1.42909	-	-	-	P55737|HS902_ARATH Heat shock protein 90-2 OS=Arabidopsis thaliana OX=3702 GN=HSP90-2 PE=1 SV=1 PF02518:Histidine kinase-, DNA gyrase B-, and HSP90-like ATPase|PF00183:Hsp90 protein	HATPase_c
BjuVB06G01220	-1.69566	-	-	-	O82337|AGP16_ARATH Arabinogalactan protein 16 OS=Arabidopsis thaliana OX=3702 GN=AGP16 PE=1 SV=1 PF06376:Arabinogalactan peptide	-
BjuVA02G30440	2.26411	-	-	-	Q9STH1|HSOP3_ARATH Hsp70-Hsp90 organizing protein 3 OS=Arabidopsis thaliana OX=3702 GN=HOP3 PE=2 SV=1 PF00515:Tetratricopeptide repeat|PF17830:STI1 domain|PF13414:TPR repeat	TPR_1
BjuVA09G58040	-3.26632	-	-	-	Q8GYX8|DNJ10_ARATH Chaperone protein dnaJ 10 OS=Arabidopsis thaliana OX=3702 GN=ATJ10 PE=2 SV=2 PF00226:DnaJ domain|PF14308:X-domain of DnaJ-containing	DnaJ
BjuVB02G55860	-1.56486	-	-	-	Q9FIJ0|RBOHD_ARATH Respiratory burst oxidase homolog protein D OS=Arabidopsis thaliana OX=3702 GN=RBOHD PE=1 SV=1 PF08022:FAD-binding domain|PF08030:Ferric reductase NAD binding domain|PF01794:Ferric reductase like transmembrane component|PF08414:Respiratory burst NADPH oxidase	FAD_binding_8
BjuVA02G15110	-3.3465	-	-	-2.25936	Q9LSQ6|PBP1_ARATH Calcium-binding protein PBP1 OS=Arabidopsis thaliana OX=3702 GN=PBP1 PE=1 SV=1 PF13833:EF-hand domain pair	-
BjuVB08G31310	-2.6561	-	-	-1.74774	Q9S9T6|FB220_ARATH F-box protein At4g05010 OS=Arabidopsis thaliana OX=3702 GN=At4g05010 PE=2 SV=1 -	-
BjuVA01G29990	-1.7646	-	-	-	Q9XIE0|FH7_ARATH Formin-like protein 7 OS=Arabidopsis thaliana OX=3702 GN=FH7 PE=2 SV=1 PF02181:Formin Homology 2 Domain	FH2
BjuVB03G17180	1.96181	-	-	-	PF06624:Ribosome associated membrane protein RAMP4	-
BjuVB05G11290	-2.66036	-	-	-	Q38910|XTH23_ARATH Probable xyloglucan endotransglucosylase/hydrolase protein 23 OS=Arabidopsis thaliana OX=3702 GN=XTH23 PE=2 SV=1 PF06955:Xyloglucan endo-transglycosylase (XET) C-terminus|PF00722:Glycosyl hydrolases family 16	-
BjuVA07G01220	-2.09157	-	-	-2.02275	P53990|IST1_HUMAN IST1 homolog OS=Homo sapiens OX=9606 GN=IST1 PE=1 SV=1 PF03398:Regulator of Vps4 activity in the MVB pathway	-
BjuVA03G42760	1.64683	-	-	-	P29197|CH60A_ARATH Chaperonin CPN60, mitochondrial OS=Arabidopsis thaliana OX=3702 GN=CPN60 PE=1 SV=2 PF00118:TCP-1/cpn60 chaperonin family	-
BjuVB01G12500	-1.93053	-	-	-	O80871|P2C25_ARATH Probable protein phosphatase 2C 25 OS=Arabidopsis thaliana OX=3702 GN=At2g30020 PE=1 SV=1 PF00481:Protein phosphatase 2C	PP2C
BjuVA06G01850	-1.7224	-	-	-	-	-
BjuVB03G19170	-4.03225	-	-	-3.51564	Q9SFE4|ERF12_ARATH Ethylene-responsive transcription factor ERF012 OS=Arabidopsis thaliana OX=3702 GN=ERF012 PE=2 SV=1 PF00847:AP2 domain	AP2
BjuVA10G30570	-1.94104	-	-	-	Q9FNH6|NHL3_ARATH NDR1/HIN1-like protein 3 OS=Arabidopsis thaliana OX=3702 GN=NHL3 PE=1 SV=1 PF03168:Late embryogenesis abundant protein	-
BjuVB02G55710	-1.65085	-	-2.59145	-	P92983|PROD1_ARATH Proline dehydrogenase 1, mitochondrial OS=Arabidopsis thaliana OX=3702 GN=POX1 PE=1 SV=2 PF01619:Proline dehydrogenase	-
BjuVA01G17800	-1.59996	1.14724	-	1.35706	Q40784|AAPC_CENCI Putative glucose-6-phosphate 1-epimerase OS=Cenchrus ciliaris OX=35872 PE=2 SV=1 PF01263:Aldose 1-epimerase	Aldose_epim
BjuVA05G08600	1.5787	-	-	-	P43287|PIP22_ARATH Aquaporin PIP2-2 OS=Arabidopsis thaliana OX=3702 GN=PIP2-2 PE=1 SV=2 PF00230:Major intrinsic protein	-
BjuVB08G01170	3.10771	3.70184	4.75378	6.33691	Q9FFF6|JOX2_ARATH Jasmonate-induced oxygenase 2 OS=Arabidopsis thaliana OX=3702 GN=JOX2 PE=1 SV=1 PF14226:non-haem dioxygenase in morphine synthesis N-terminal|PF03171:2OG-Fe(II) oxygenase superfamily	2OG-FeII_Oxy
BjuVB03G38830	-1.54973	1.2339	-	1.21446	Q9S972|SD16_ARATH Receptor-like serine/threonine-protein kinase SD1-6 OS=Arabidopsis thaliana OX=3702 GN=SD16 PE=1 SV=2 PF07714:Protein tyrosine and serine/threonine kinase|PF00954:S-locus glycoprotein domain|PF01453:D-mannose binding lectin|PF12398:Receptor serine/threonine kinase|PF11883:Domain of unknown function (DUF3403)|PF08276:PAN-like domain	Pkinase_Tyr
BjuVA09G49470	-1.80646	-	-	-	Q9SV30|GATA8_ARATH GATA transcription factor 8 OS=Arabidopsis thaliana OX=3702 GN=GATA8 PE=1 SV=1 PF00320:GATA zinc finger	GATA
BjuVB03G34110	-2.97719	-	1.46487	1.42851	Q9FZ21|G2OX6_ARATH Gibberellin 2-beta-dioxygenase 6 OS=Arabidopsis thaliana OX=3702 GN=GA2OX6 PE=2 SV=1 PF03171:2OG-Fe(II) oxygenase superfamily|PF14226:non-haem dioxygenase in morphine synthesis N-terminal	2OG-FeII_Oxy
BjuVB08G20450	2.38705	2.65847	2.874	2.98652	Q9ZVJ6|ANXD4_ARATH Annexin D4 OS=Arabidopsis thaliana OX=3702 GN=ANN4 PE=1 SV=1 PF00191:Annexin	-
BjuVA02G21850	1.87761	3.50701	3.6473	4.4632	Q8W4J8|TIF7_ARATH Protein TIFY 7 OS=Arabidopsis thaliana OX=3702 GN=TIFY7 PE=1 SV=2 PF09425:Jas motif|PF06200:tify domain	Zim
BjuVA09G21280	1.7392	-	-	-	P39207|NDK1_ARATH Nucleoside diphosphate kinase 1 OS=Arabidopsis thaliana OX=3702 GN=NDK1 PE=1 SV=1 PF00334:Nucleoside diphosphate kinase	NDK
BjuVA08G37420	2.44731	-	-	-	Q940Q1|PLY1_ARATH Probable pectate lyase 1 OS=Arabidopsis thaliana OX=3702 GN=At1g04680 PE=2 SV=2 PF00544:Pectate lyase	-
BjuVA09G48240	-1.78351	-	-	-3.8561	Q93ZS9|C3H47_ARATH Zinc finger CCCH domain-containing protein 47 OS=Arabidopsis thaliana OX=3702 GN=At3g55980 PE=2 SV=1 -	-
BjuVB04G32680	-1.78219	-	1.13472	-	Q9LPU8|IGMT4_ARATH Indole glucosinolate O-methyltransferase 4 OS=Arabidopsis thaliana OX=3702 GN=IGMT4 PE=1 SV=1 PF00891:O-methyltransferase domain|PF08100:Dimerisation domain	-
BjuVB02G39060	-1.49884	-	-1.15573	-1.43617	Q8S9J6|ASPA_ARATH Aspartyl protease family protein At5g10770 OS=Arabidopsis thaliana OX=3702 GN=At5g10770 PE=2 SV=1 PF14541:Xylanase inhibitor C-terminal|PF14543:Xylanase inhibitor N-terminal	-
BjuVA06G35480	-1.54416	-	1.07734	-	P42043|HEMH1_ARATH Ferrochelatase-1, chloroplastic/mitochondrial OS=Arabidopsis thaliana OX=3702 GN=FC1 PE=2 SV=1 PF00762:Ferrochelatase	-
BjuVB03G25190	-2.01483	-	-	-	Q9SA25|WAKLG_ARATH Wall-associated receptor kinase-like 8 OS=Arabidopsis thaliana OX=3702 GN=WAKL8 PE=2 SV=1 PF08488:Wall-associated kinase|PF07714:Protein tyrosine and serine/threonine kinase	Pkinase_Tyr
BjuVA05G19140	1.54576	-	-	-	Q42524|4CL1_ARATH 4-coumarate--CoA ligase 1 OS=Arabidopsis thaliana OX=3702 GN=4CL1 PE=1 SV=1 PF13193:AMP-binding enzyme C-terminal domain|PF00501:AMP-binding enzyme	AMP-binding
BjuVB01G36510	1.81197	-	-	1.35164	P82353|NLTP2_PRUAR Non-specific lipid-transfer protein 2 OS=Prunus armeniaca OX=36596 PE=1 SV=1 -	-
BjuVA08G16140	-1.78976	-	-	-	Q9ZP16|CRK11_ARATH Cysteine-rich receptor-like protein kinase 11 OS=Arabidopsis thaliana OX=3702 GN=CRK11 PE=2 SV=2 PF01657:Salt stress response/antifungal|PF07714:Protein tyrosine and serine/threonine kinase	Pkinase_Tyr
BjuVB08G48870	-1.80778	-	-	-1.97923	Q9SCK6|NAC62_ARATH NAC domain-containing protein 62 OS=Arabidopsis thaliana OX=3702 GN=NAC062 PE=1 SV=1 PF02365:No apical meristem (NAM) protein	NAM
BjuVA07G21570	-1.71824	-	-	-	Q9SJM6|SAP4_ARATH Zinc finger A20 and AN1 domain-containing stress-associated protein 4 OS=Arabidopsis thaliana OX=3702 GN=SAP4 PE=1 SV=1 PF01428:AN1-like Zinc finger|PF01754:A20-like zinc finger	zf-AN1
BjuVB02G72990	1.83877	-	-	-	O49499|CAMT4_ARATH Caffeoyl-CoA O-methyltransferase 1 OS=Arabidopsis thaliana OX=3702 GN=CCOAOMT1 PE=1 SV=1 PF01596:O-methyltransferase	-
BjuVB01G15690	1.5835	-	-	-	Q93ZE8|SDF2_ARATH Stromal cell-derived factor 2-like protein OS=Arabidopsis thaliana OX=3702 GN=SDF2 PE=1 SV=1 PF02815:MIR domain	-
BjuVA03G09830	-1.65665	-	-	-	F4J339|RPP1_ARATH Probable disease resistance protein RPP1 OS=Arabidopsis thaliana OX=3702 GN=RPP1 PE=1 SV=1 PF01582:TIR domain|PF07725:Leucine Rich Repeat|PF00931:NB-ARC domain	TIR
BjuVB04G31740	-2.34153	-	-	-1.57375	-	-
BjuVB04G16210	-2.43099	-	-	-1.80883	-	-
BjuVA04G07330	-1.96047	-	-	-	Q9SVC2|SY122_ARATH Syntaxin-122 OS=Arabidopsis thaliana OX=3702 GN=SYP122 PE=1 SV=1 PF05739:SNARE domain|PF00804:Syntaxin	SNARE
BjuVB06G55210	-1.4277	-	-	2.10724	P0DH97|CALM2_ARATH Calmodulin-2 OS=Arabidopsis thaliana OX=3702 GN=CAM2 PE=1 SV=1 PF13499:EF-hand domain pair	-
BjuVA09G10500	1.6169	1.70012	-	1.65865	Q43295|APK1_ARATH Adenylyl-sulfate kinase 1, chloroplastic OS=Arabidopsis thaliana OX=3702 GN=APK1 PE=1 SV=1 PF01583:Adenylylsulphate kinase	-
BjuVB05G35130	-2.1753	-	-	-2.20907	Q940T5|RDUF2_ARATH E3 ubiquitin-protein ligase RDUF2 OS=Arabidopsis thaliana OX=3702 GN=DURF2 PE=1 SV=1 PF13639:Ring finger domain|PF06547:Protein of unknown function (DUF1117)|PF14369:zinc-ribbon	-
BjuVA03G42600	1.60172	1.3272	1.33353	3.79962	Q9LK36|SAHH2_ARATH Adenosylhomocysteinase 2 OS=Arabidopsis thaliana OX=3702 GN=SAHH2 PE=2 SV=1 PF00670:S-adenosyl-L-homocysteine hydrolase, NAD binding domain|PF05221:S-adenosyl-L-homocysteine hydrolase	-
BjuVA03G47080	-2.47158	-	1.16741	-	Q9SN12|MYB77_ARATH Transcription factor MYB77 OS=Arabidopsis thaliana OX=3702 GN=MYB77 PE=1 SV=1 PF00249:Myb-like DNA-binding domain	Myb_DNA-binding
BjuVB03G26280	-1.99724	-	-	-	Q9CAK4|ROH1_ARATH Protein ROH1 OS=Arabidopsis thaliana OX=3702 GN=ROH1 PE=1 SV=1 PF05633:Protein BYPASS1-related	-
BjuVB01G05350	-2.23462	1.08633	1.53551	1.48528	Q9C942|CSE_ARATH Caffeoylshikimate esterase OS=Arabidopsis thaliana OX=3702 GN=CSE PE=1 SV=1 PF12146:Serine aminopeptidase, S33	-
BjuVB07G03840	-1.40569	-	-	-	Q8W4L0|CML49_ARATH Probable calcium-binding protein CML49 OS=Arabidopsis thaliana OX=3702 GN=CML49 PE=2 SV=1 PF13405:EF-hand domain	-
BjuVB02G38840	-1.39338	-	-	-	-	-
BjuVA10G16940	-2.07684	-	-	-2.11614	Q9SNB6|RDUF1_ARATH E3 ubiquitin-protein ligase RDUF1 OS=Arabidopsis thaliana OX=3702 GN=RDUF1 PE=1 SV=1 PF06547:Protein of unknown function (DUF1117)|PF13639:Ring finger domain|PF14369:zinc-ribbon	-
BjuVA03G42650	2.22947	-	-	-	O94808|GFPT2_HUMAN Glutamine--fructose-6-phosphate aminotransferase [isomerizing] 2 OS=Homo sapiens OX=9606 GN=GFPT2 PE=1 SV=3 PF13522:Glutamine amidotransferase domain|PF01380:SIS domain	SIS
BjuVA05G15050	-2.13679	-	-	-1.35348	O80871|P2C25_ARATH Probable protein phosphatase 2C 25 OS=Arabidopsis thaliana OX=3702 GN=At2g30020 PE=1 SV=1 PF00481:Protein phosphatase 2C	PP2C
BjuVB03G19330	-1.84835	-	-	-	O81760|P2C63_ARATH Probable protein phosphatase 2C 63 OS=Arabidopsis thaliana OX=3702 GN=At4g33920 PE=2 SV=1 PF00481:Protein phosphatase 2C	PP2C
BjuVA02G22350	2.8214	-	-	-	Q9C9H5|GUN9_ARATH Endoglucanase 9 OS=Arabidopsis thaliana OX=3702 GN=CEL3 PE=1 SV=1 PF00759:Glycosyl hydrolase family 9	-
BjuVB03G42180	1.79756	-	-	1.9632	Q9C6H3|SINL2_ARATH E3 ubiquitin-protein ligase SINA-like 2 OS=Arabidopsis thaliana OX=3702 GN=At1g66620 PE=2 SV=1 PF03145:Seven in absentia protein family	-
BjuVB02G26440	-2.45885	-	1.20874	-	Q38857|XTH22_ARATH Xyloglucan endotransglucosylase/hydrolase protein 22 OS=Arabidopsis thaliana OX=3702 GN=XTH22 PE=1 SV=1 PF00722:Glycosyl hydrolases family 16|PF06955:Xyloglucan endo-transglycosylase (XET) C-terminus	-
BjuVA06G13760	-1.63117	-	-	-	Q9LE22|CML27_ARATH Probable calcium-binding protein CML27 OS=Arabidopsis thaliana OX=3702 GN=CML27 PE=1 SV=1 PF13499:EF-hand domain pair	-
BjuVA07G15550	-1.56857	-	1.05727	-	Q9LPU7|IGMT2_ARATH Indole glucosinolate O-methyltransferase 2 OS=Arabidopsis thaliana OX=3702 GN=IGMT2 PE=2 SV=1 PF00891:O-methyltransferase domain|PF08100:Dimerisation domain	-
BjuVB06G56680	1.55935	-	-	-	P45724|PAL2_ARATH Phenylalanine ammonia-lyase 2 OS=Arabidopsis thaliana OX=3702 GN=PAL2 PE=1 SV=2 PF00221:Aromatic amino acid lyase	-
BjuVB04G13920	-2.19332	-	-	-	PF00564:PB1 domain	-
BjuVA06G18100	-1.57547	-	-	-1.84696	Q9SCK6|NAC62_ARATH NAC domain-containing protein 62 OS=Arabidopsis thaliana OX=3702 GN=NAC062 PE=1 SV=1 PF02365:No apical meristem (NAM) protein	NAM
BjuVB05G06480	-1.41043	-	-	1.46275	-	-
BjuVB02G59130	-2.25178	-	-	-	O81445|CNBL1_ARATH Calcineurin B-like protein 1 OS=Arabidopsis thaliana OX=3702 GN=CBL1 PE=1 SV=3 PF13202:EF hand	-
BjuVB04G33080	1.81168	-	-	-	Q9LPK6|AEE9_ARATH Probable acyl-activating enzyme 9 OS=Arabidopsis thaliana OX=3702 GN=AEE9 PE=2 SV=1 PF00501:AMP-binding enzyme|PF13193:AMP-binding enzyme C-terminal domain	AMP-binding
BjuVB06G38880	1.55266	-	-	-	Q9MAU6|PDI22_ARATH Protein disulfide-isomerase like 2-2 OS=Arabidopsis thaliana OX=3702 GN=PDIL2-2 PE=2 SV=2 PF00085:Thioredoxin	-
BjuVA07G36800	-2.26289	-	-	-	O04532|FH8_ARATH Formin-like protein 8 OS=Arabidopsis thaliana OX=3702 GN=FH8 PE=1 SV=1 PF02181:Formin Homology 2 Domain	FH2
BjuVA07G20150	-1.95381	-	1.28758	-	Q9FPH0|XB34_ARATH Putative E3 ubiquitin-protein ligase XBAT34 OS=Arabidopsis thaliana OX=3702 GN=XBAT34 PE=2 SV=1 PF13920:Zinc finger, C3HC4 type (RING finger)|PF12796:Ankyrin repeats (3 copies)	-
BjuVB04G23380	-1.93378	-	-	-	O64477|Y2913_ARATH G-type lectin S-receptor-like serine/threonine-protein kinase At2g19130 OS=Arabidopsis thaliana OX=3702 GN=At2g19130 PE=2 SV=1 PF00954:S-locus glycoprotein domain|PF08276:PAN-like domain|PF01453:D-mannose binding lectin	B_lectin
BjuVB06G52720	1.52775	-	-	-	Q9LZK5|DNJ19_ARATH DnaJ protein ERDJ3B OS=Arabidopsis thaliana OX=3702 GN=ERDJ3B PE=1 SV=1 PF00226:DnaJ domain|PF01556:DnaJ C terminal domain	DnaJ_C
BjuVB07G20340	-1.5971	-	-	-	Q8GYF5|WAKLR_ARATH Wall-associated receptor kinase-like 21 OS=Arabidopsis thaliana OX=3702 GN=WAKL21 PE=2 SV=2 PF07714:Protein tyrosine and serine/threonine kinase	Pkinase_Tyr
BjuVA02G46690	-1.76876	1.15762	1.00456	1.7973	Q9S7P9|SNP33_ARATH SNAP25 homologous protein SNAP33 OS=Arabidopsis thaliana OX=3702 GN=SNAP33 PE=1 SV=1 -	-
BjuVB04G34090	1.58091	-	-	-	P27608|AROF_TOBAC Phospho-2-dehydro-3-deoxyheptonate aldolase 1, chloroplastic OS=Nicotiana tabacum OX=4097 GN=DHAPS-1 PE=2 SV=1 PF01474:Class-II DAHP synthetase family	-
BjuVA08G26440	-1.46401	-	-	-	Q37145|ACA1_ARATH Calcium-transporting ATPase 1 OS=Arabidopsis thaliana OX=3702 GN=ACA1 PE=1 SV=3 PF00689:Cation transporting ATPase, C-terminus|PF12515:Ca2+-ATPase N terminal autoinhibitory domain|PF00122:E1-E2 ATPase|PF00690:Cation transporter/ATPase, N-terminus|PF13246:Cation transport ATPase (P-type)	Cation_ATPase_C
BjuVB03G49540	-2.33528	-	-	-2.04915	Q9SRE6|CML38_ARATH Calcium-binding protein CML38 OS=Arabidopsis thaliana OX=3702 GN=CML38 PE=1 SV=1 PF13833:EF-hand domain pair|PF13499:EF-hand domain pair	-
BjuVB03G07210	-2.01072	-	-	-1.46269	Q9LE73|NUDT4_ARATH Nudix hydrolase 4 OS=Arabidopsis thaliana OX=3702 GN=NUDT4 PE=1 SV=1 PF00293:NUDIX domain	NUDIX
BjuVB03G19630	-1.69229	-	1.10794	-	C6KIE6|XLG2_ARATH Extra-large guanine nucleotide-binding protein 2 OS=Arabidopsis thaliana OX=3702 GN=XLG2 PE=1 SV=1 PF00503:G-protein alpha subunit	G-alpha
BjuVB03G46730	1.92631	1.6085	1.321	3.10773	Q9C9D0|SOT16_ARATH Cytosolic sulfotransferase 16 OS=Arabidopsis thaliana OX=3702 GN=SOT16 PE=1 SV=1 PF00685:Sulfotransferase domain	Sulfotransfer_1
BjuVA07G30030	-2.05703	-1.38046	-2.55599	-	Q9C6B9|PEAM3_ARATH Phosphoethanolamine N-methyltransferase 3 OS=Arabidopsis thaliana OX=3702 GN=NMT3 PE=2 SV=2 PF13847:Methyltransferase domain|PF08241:Methyltransferase domain	Methyltransf_11
BjuVB08G19290	2.14227	2.82736	3.48172	4.12229	P43287|PIP22_ARATH Aquaporin PIP2-2 OS=Arabidopsis thaliana OX=3702 GN=PIP2-2 PE=1 SV=2 PF00230:Major intrinsic protein	-
BjuVA09G42780	-1.77001	-	-	-2.11244	Q9LM15|RA213_ARATH Ethylene-responsive transcription factor RAP2-13 OS=Arabidopsis thaliana OX=3702 GN=RAP2-13 PE=1 SV=1 PF00847:AP2 domain	AP2
BjuVB08G54780	-1.67168	-	-	-3.5103	Q93ZS9|C3H47_ARATH Zinc finger CCCH domain-containing protein 47 OS=Arabidopsis thaliana OX=3702 GN=At3g55980 PE=2 SV=1 -	-
BjuVA09G47460	-1.68855	-	-	-	O80683|CAB25_ARATH Calmodulin-binding protein 25 OS=Arabidopsis thaliana OX=3702 GN=CAMBP25 PE=1 SV=1 PF05678:VQ motif	-
BjuVA01G19160	-2.75877	-	1.39835	-2.33789	O81831|CARP1_ARATH Calcium-binding protein KRP1 OS=Arabidopsis thaliana OX=3702 GN=KRP1 PE=2 SV=1 PF13833:EF-hand domain pair|PF03358:NADPH-dependent FMN reductase	FMN_red
BjuVB05G24700	-1.70567	-	-	-	-	-
BjuVA06G34340	-1.42783	-	-	-	Q9LKG8|NAC91_ARATH NAC domain-containing protein 91 OS=Arabidopsis thaliana OX=3702 GN=NAC091 PE=1 SV=1 PF02365:No apical meristem (NAM) protein	NAM
BjuVA05G27320	1.51346	-	-1.78719	-2.52746	Q9LVF0|U84A2_ARATH UDP-glycosyltransferase 84A2 OS=Arabidopsis thaliana OX=3702 GN=UGT84A2 PE=1 SV=1 PF00201:UDP-glucoronosyl and UDP-glucosyl transferase	UDPGT
BjuVB02G09790	3.42012	3.52303	4.39882	6.39549	PF06813:Nodulin-like	-
BjuVB03G08640	-1.70784	-	1.20137	-	Q9LPU5|IGMT1_ARATH Indole glucosinolate O-methyltransferase 1 OS=Arabidopsis thaliana OX=3702 GN=IGMT1 PE=1 SV=1 PF08100:Dimerisation domain|PF00891:O-methyltransferase domain	-
BjuVB02G25760	-3.48217	-	-	-	Q058N0|IQM5_ARATH IQ domain-containing protein IQM5 OS=Arabidopsis thaliana OX=3702 GN=IQM5 PE=2 SV=1 -	-
BjuVB05G46910	1.54356	1.14424	-	-	Q9LD90|CBF5_ARATH H/ACA ribonucleoprotein complex subunit 4 OS=Arabidopsis thaliana OX=3702 GN=CBF5 PE=1 SV=1 PF01509:TruB family pseudouridylate synthase (N terminal domain)|PF08068:DKCLD (NUC011) domain|PF01472:PUA domain|PF16198:tRNA pseudouridylate synthase B C-terminal domain	-
BjuVB06G14930	1.71687	-	-	-	Q9FEB4|PSK5_ARATH Phytosulfokines 5 OS=Arabidopsis thaliana OX=3702 GN=PSK5 PE=2 SV=1 -	-
BjuVB08G53620	3.66524	-	-	-	Q9SV31|PIP25_ARATH Probable aquaporin PIP2-5 OS=Arabidopsis thaliana OX=3702 GN=PIP2-5 PE=1 SV=1 PF00230:Major intrinsic protein	-
BjuVB07G16520	-1.54786	-	-	-	P29162|ASOL_TOBAC L-ascorbate oxidase homolog OS=Nicotiana tabacum OX=4097 PE=2 SV=1 PF00394:Multicopper oxidase|PF07731:Multicopper oxidase|PF07732:Multicopper oxidase	-
BjuVA02G40980	-2.02241	-	-	-	Q9LK32|Y3721_ARATH Uncharacterized protein At3g27210 OS=Arabidopsis thaliana OX=3702 GN=Y-2 PE=1 SV=1 -	-
BjuVA08G02200	-2.00826	-	-	-	A3KPF5|PDI15_ARATH Protein disulfide isomerase-like 1-5 OS=Arabidopsis thaliana OX=3702 GN=PDIL1-5 PE=2 SV=1 PF13848:Thioredoxin-like domain|PF00085:Thioredoxin	-
BjuVB08G53610	-1.82224	-	1.05618	-	Q9SV30|GATA8_ARATH GATA transcription factor 8 OS=Arabidopsis thaliana OX=3702 GN=GATA8 PE=1 SV=1 PF00320:GATA zinc finger	GATA
BjuVA09G65730	-2.24335	-	-1.00386	-	PF02298:Plastocyanin-like domain	Cu_bind_like
BjuVA03G11900	2.04965	-	-	-	Q9SP02|CP20A_ARATH Peptidyl-prolyl cis-trans isomerase CYP20-1 OS=Arabidopsis thaliana OX=3702 GN=CYP20-1 PE=1 SV=1 PF00160:Cyclophilin type peptidyl-prolyl cis-trans isomerase/CLD	Pro_isomerase
BjuVA10G17250	-2.95818	-	-	-1.73995	Q42410|ZAT12_ARATH Zinc finger protein ZAT12 OS=Arabidopsis thaliana OX=3702 GN=ZAT12 PE=2 SV=1 PF13912:C2H2-type zinc finger	-
BjuVB02G46670	2.3783	-	-	-	Q9C523|DIR19_ARATH Dirigent protein 19 OS=Arabidopsis thaliana OX=3702 GN=DIR19 PE=2 SV=1 PF03018:Dirigent-like protein	-
BjuVA05G06300	-1.91037	-	-	-2.78569	O04203|HSPR2_ARATH Nematode resistance protein-like HSPRO2 OS=Arabidopsis thaliana OX=3702 GN=HSPRO2 PE=1 SV=1 PF07231:Hs1pro-1 N-terminus|PF07014:Hs1pro-1 protein C-terminus	-
BjuVA04G15010	-1.32202	-	-	-	F4I594|RLM1A_ARATH Disease resistance protein RML1A OS=Arabidopsis thaliana OX=3702 GN=RLM1A PE=3 SV=1 PF00931:NB-ARC domain|PF01582:TIR domain	TIR
BjuVB06G04220	-1.96623	-	1.39139	-	A0A0B5GR44|OFT20_BRANA O-fucosyltransferase 20 OS=Brassica napus OX=3708 GN=OFUT20 PE=2 SV=2 PF10250:GDP-fucose protein O-fucosyltransferase	-
BjuVA07G42260	-3.35184	-	-	-	Q9SRE6|CML38_ARATH Calcium-binding protein CML38 OS=Arabidopsis thaliana OX=3702 GN=CML38 PE=1 SV=1 PF13499:EF-hand domain pair|PF13833:EF-hand domain pair	-
BjuVA02G48290	-2.15934	1.25255	2.41243	1.75098	Q9FE06|EXOL2_ARATH Protein EXORDIUM-like 2 OS=Arabidopsis thaliana OX=3702 GN=EXL2 PE=2 SV=1 PF04674:Phosphate-induced protein 1 conserved region	-
BjuVA10G22300	-2.41488	-	-	-3.64339	PF14009:Domain of unknown function (DUF4228)	-
BjuVA08G19920	2.10908	-	-	-	-	-
BjuVA09G09320	1.46037	-	-	1.67672	O65351|SBT17_ARATH Subtilisin-like protease SBT1.7 OS=Arabidopsis thaliana OX=3702 GN=SBT1.7 PE=1 SV=1 PF02225:PA domain|PF00082:Subtilase family|PF05922:Peptidase inhibitor I9|PF17766:Fibronectin type-III domain	Peptidase_S8
BjuVA08G30950	-1.51598	-	-	-	Q9LE22|CML27_ARATH Probable calcium-binding protein CML27 OS=Arabidopsis thaliana OX=3702 GN=CML27 PE=1 SV=1 PF13499:EF-hand domain pair	-
BjuVA10G22870	-1.74588	-	-2.11782	-	Q9FMD9|GLN14_ARATH Glutamine synthetase cytosolic isozyme 1-4 OS=Arabidopsis thaliana OX=3702 GN=GLN1-4 PE=1 SV=1 PF00120:Glutamine synthetase, catalytic domain|PF03951:Glutamine synthetase, beta-Grasp domain	-
BjuVA06G38600	-1.81487	-	-4.60475	-	P92983|PROD1_ARATH Proline dehydrogenase 1, mitochondrial OS=Arabidopsis thaliana OX=3702 GN=POX1 PE=1 SV=2 PF01619:Proline dehydrogenase	-
BjuVA02G00180	-1.71203	-	-	1.65153	Q9LZX1|LOR15_ARATH Protein LURP-one-related 15 OS=Arabidopsis thaliana OX=3702 GN=At5g01750 PE=1 SV=1 PF04525:LURP-one-related	-
BjuVB04G33840	-1.53049	-	-	-1.15185	Q9LM15|RA213_ARATH Ethylene-responsive transcription factor RAP2-13 OS=Arabidopsis thaliana OX=3702 GN=RAP2-13 PE=1 SV=1 PF00847:AP2 domain	AP2
BjuVB08G04190	1.56017	-	-	-	Q8GZ29|GH315_ARATH Indole-3-acetic acid-amido synthetase GH3.15 OS=Arabidopsis thaliana OX=3702 GN=GH3.15 PE=1 SV=1 PF03321:GH3 auxin-responsive promoter	-
BjuVB02G28390	-1.97056	-	-	-1.48559	Q940T5|RDUF2_ARATH E3 ubiquitin-protein ligase RDUF2 OS=Arabidopsis thaliana OX=3702 GN=DURF2 PE=1 SV=1 PF06547:Protein of unknown function (DUF1117)|PF13639:Ring finger domain|PF14369:zinc-ribbon	-
BjuVA05G38520	-2.32168	-	-	-3.21347	-	-
BjuVB08G22200	-1.58285	-	-	1.42539	P0DH97|CALM2_ARATH Calmodulin-2 OS=Arabidopsis thaliana OX=3702 GN=CAM2 PE=1 SV=1 PF13499:EF-hand domain pair	-
BjuVA09G11100	-1.66308	-	-1.26737	-	I1LPE9|NAC6_SOYBN NAC domain-containing protein 6 OS=Glycine max OX=3847 GN=NAC6 PE=2 SV=1 PF02365:No apical meristem (NAM) protein	NAM
BjuVA01G26980	-1.52537	-	-	-1.56048	Q9SNB8|SCL30_ARATH Scarecrow-like protein 30 OS=Arabidopsis thaliana OX=3702 GN=SCL30 PE=1 SV=1 PF03514:GRAS domain family	GRAS
BjuVA06G38000	2.17185	-	-	-	Q9FJL3|FKB65_ARATH Peptidyl-prolyl cis-trans isomerase FKBP65 OS=Arabidopsis thaliana OX=3702 GN=FKBP65 PE=1 SV=1 PF00254:FKBP-type peptidyl-prolyl cis-trans isomerase	FKBP_C
BjuVA09G20700	-2.38703	-	-	-	-	-
BjuVA04G24670	-1.34642	-	-	-	Q9SKB2|SBIR1_ARATH Leucine-rich repeat receptor-like serine/threonine/tyrosine-protein kinase SOBIR1 OS=Arabidopsis thaliana OX=3702 GN=SOBIR1 PE=1 SV=1 PF13855:Leucine rich repeat|PF00069:Protein kinase domain	Pkinase
BjuVB04G12370	-1.43793	-	-	-	Q9FG87|KCS20_ARATH 3-ketoacyl-CoA synthase 20 OS=Arabidopsis thaliana OX=3702 GN=KCS20 PE=2 SV=1 PF08541:3-Oxoacyl-[acyl-carrier-protein (ACP)] synthase III C terminal|PF08392:FAE1/Type III polyketide synthase-like protein	-
BjuVA08G17290	1.40318	-	-	-	O49499|CAMT4_ARATH Caffeoyl-CoA O-methyltransferase 1 OS=Arabidopsis thaliana OX=3702 GN=CCOAOMT1 PE=1 SV=1 PF01596:O-methyltransferase	-
BjuVA01G18630	-1.6799	-	-	-	Q9SZ11|GPDL3_ARATH Glycerophosphodiester phosphodiesterase GDPDL3 OS=Arabidopsis thaliana OX=3702 GN=GDPDL3 PE=2 SV=3 PF03009:Glycerophosphoryl diester phosphodiesterase family	-
BjuVB03G44030	-2.74245	-	-	-4.41305	Q9C9I2|ERF21_ARATH Ethylene-responsive transcription factor ERF021 OS=Arabidopsis thaliana OX=3702 GN=ERF021 PE=2 SV=1 PF00847:AP2 domain	AP2
BjuVA07G23700	-1.87464	-	1.02937	-	Q6NLQ6|CDPKW_ARATH Calcium-dependent protein kinase 32 OS=Arabidopsis thaliana OX=3702 GN=CPK32 PE=1 SV=1 PF13499:EF-hand domain pair|PF00069:Protein kinase domain	Pkinase
BjuVA07G39550	4.98941	5.29988	5.89394	5.76816	PF00917:MATH domain	MATH
BjuVA10G09990	-2.91528	-	-	-1.60398	Q9FJ93|DRE1D_ARATH Dehydration-responsive element-binding protein 1D OS=Arabidopsis thaliana OX=3702 GN=DREB1D PE=2 SV=1 PF00847:AP2 domain	AP2
BjuVB02G03510	-1.69323	-	-	-	P49294|HEM12_ARATH Glutamyl-tRNA reductase 2, chloroplastic OS=Arabidopsis thaliana OX=3702 GN=HEMA2 PE=2 SV=2 PF05201:Glutamyl-tRNAGlu reductase, N-terminal domain|PF01488:Shikimate / quinate 5-dehydrogenase|PF00745:Glutamyl-tRNAGlu reductase, dimerisation domain	-
BjuVA09G59610	-2.51799	1.8691	1.74533	2.07443	Q9LZX1|LOR15_ARATH Protein LURP-one-related 15 OS=Arabidopsis thaliana OX=3702 GN=At5g01750 PE=1 SV=1 PF04525:LURP-one-related	-
BjuVB04G08530	4.7116	-	3.10728	4.83008	P42813|RNS1_ARATH Ribonuclease 1 OS=Arabidopsis thaliana OX=3702 GN=RNS1 PE=1 SV=1 PF00445:Ribonuclease T2 family	Ribonuclease_T2
BjuVA03G34620	-1.53109	1.28473	1.20231	1.12273	Q94BT2|AIR12_ARATH Auxin-induced in root cultures protein 12 OS=Arabidopsis thaliana OX=3702 GN=AIR12 PE=1 SV=3 PF04526:Protein of unknown function (DUF568)	-
BjuVA02G45610	-1.45213	-	-	1.48344	B9DGY1|AB1K7_ARATH Protein ACTIVITY OF BC1 COMPLEX KINASE 7, chloroplastic OS=Arabidopsis thaliana OX=3702 GN=ABC1K7 PE=1 SV=1 PF03109:ABC1 family|PF00144:Beta-lactamase	Beta-lactamase
BjuVB06G47620	1.68219	1.44917	-	-	Q9LD90|CBF5_ARATH H/ACA ribonucleoprotein complex subunit 4 OS=Arabidopsis thaliana OX=3702 GN=CBF5 PE=1 SV=1 PF16198:tRNA pseudouridylate synthase B C-terminal domain|PF01509:TruB family pseudouridylate synthase (N terminal domain)|PF08068:DKCLD (NUC011) domain|PF01472:PUA domain	-
BjuV_Contig00578G00040	-1.96391	-	-	1.75394	Q9M325|IPCS1_ARATH Phosphatidylinositol:ceramide inositolphosphotransferase 1 OS=Arabidopsis thaliana OX=3702 GN=IPCS1 PE=2 SV=1 PF14360:PAP2 superfamily C-terminal	-
BjuVB06G44170	-1.61871	1.44168	1.87572	1.3376	Q9XIE2|AB36G_ARATH ABC transporter G family member 36 OS=Arabidopsis thaliana OX=3702 GN=ABCG36 PE=1 SV=1 PF19055:ABC-2 type transporter|PF01061:ABC-2 type transporter|PF00005:ABC transporter|PF08370:Plant PDR ABC transporter associated|PF14510:ABC-transporter N-terminal	ABC2_membrane
BjuVB06G09260	-3.62238	-	-	-	Q8VZP6|GUX8_ARATH Putative glucuronosyltransferase PGSIP8 OS=Arabidopsis thaliana OX=3702 GN=PGSIP8 PE=2 SV=1 -	-
BjuVA05G18070	-1.46862	-	1.03737	1.57344	Q8L636|NCL_ARATH Sodium/calcium exchanger NCL OS=Arabidopsis thaliana OX=3702 GN=NCL PE=2 SV=1 PF13499:EF-hand domain pair|PF01699:Sodium/calcium exchanger protein	Na_Ca_ex
BjuVB06G19720	1.7019	-	-	-	P92994|TCMO_ARATH Trans-cinnamate 4-monooxygenase OS=Arabidopsis thaliana OX=3702 GN=CYP73A5 PE=1 SV=1 PF00067:Cytochrome P450	p450
BjuVA03G00160	-1.59785	-	-	-	PF05050:Methyltransferase FkbM domain	-
BjuVA10G33300	1.5647	-	-	-	Q9LYW9|DNJ36_ARATH DnaJ protein P58IPK homolog OS=Arabidopsis thaliana OX=3702 GN=P58IPK PE=1 SV=1 PF00226:DnaJ domain	DnaJ
BjuVA01G03310	-1.29702	-	-	-	Q38871|CDPK5_ARATH Calcium-dependent protein kinase 5 OS=Arabidopsis thaliana OX=3702 GN=CPK5 PE=2 SV=1 PF00069:Protein kinase domain|PF13499:EF-hand domain pair	Pkinase
BjuVB06G20440	-1.5336	-	-	-	Q04088|POF21_ARATH Probable transcription factor PosF21 OS=Arabidopsis thaliana OX=3702 GN=POSF21 PE=2 SV=1 PF00170:bZIP transcription factor	bZIP_1
BjuVA10G10470	-2.06007	-	-	-1.49171	Q9LTE2|HIP13_ARATH Heavy metal-associated isoprenylated plant protein 13 OS=Arabidopsis thaliana OX=3702 GN=HIPP13 PE=2 SV=1 -	-
BjuVB05G15950	-1.30039	-	-	-	Q9SVG4|RETOL_ARATH Berberine bridge enzyme-like 19 OS=Arabidopsis thaliana OX=3702 GN=At4g20830 PE=1 SV=2 PF01565:FAD binding domain|PF08031:Berberine and berberine like	FAD_binding_4
BjuVB08G16430	1.81471	-	-	-	-	-
BjuVB06G27310	1.29888	-	-	-	Q42524|4CL1_ARATH 4-coumarate--CoA ligase 1 OS=Arabidopsis thaliana OX=3702 GN=4CL1 PE=1 SV=1 PF00501:AMP-binding enzyme|PF13193:AMP-binding enzyme C-terminal domain	AMP-binding
BjuVB08G24820	-1.85851	-	-	-	Q9LQ92|PUB54_ARATH U-box domain-containing protein 54 OS=Arabidopsis thaliana OX=3702 GN=PUB54 PE=2 SV=1 PF04564:U-box domain	U-box
BjuVA04G05930	-1.76906	-	-	1.84851	Q9M325|IPCS1_ARATH Phosphatidylinositol:ceramide inositolphosphotransferase 1 OS=Arabidopsis thaliana OX=3702 GN=IPCS1 PE=2 SV=1 PF14360:PAP2 superfamily C-terminal	-
BjuVB03G36540	-2.24315	-	-	-	P0DH86|SRK_ARATH G-type lectin S-receptor-like serine/threonine-protein kinase SRK OS=Arabidopsis thaliana OX=3702 GN=SRK PE=2 SV=1 PF07714:Protein tyrosine and serine/threonine kinase	Pkinase_Tyr
BjuVB05G13740	-2.00479	-	1.47594	-	O65476|CRK16_ARATH Putative cysteine-rich receptor-like protein kinase 16 OS=Arabidopsis thaliana OX=3702 GN=CRK16 PE=3 SV=2 PF07714:Protein tyrosine and serine/threonine kinase|PF01657:Salt stress response/antifungal	Pkinase_Tyr
BjuVB08G56650	-1.68429	-	-	-	-	-
BjuVB07G29680	-2.8159	-	-	-2.19634	Q8L9T5|ATL2_ARATH RING-H2 finger protein ATL2 OS=Arabidopsis thaliana OX=3702 GN=ATL2 PE=2 SV=2 PF13639:Ring finger domain	-
BjuVB05G42770	-1.62988	-	-	-1.68776	Q9SB04|ARR5_ARATH Two-component response regulator ARR5 OS=Arabidopsis thaliana OX=3702 GN=ARR5 PE=1 SV=2 PF00072:Response regulator receiver domain	Response_reg
BjuVB01G40550	-1.72849	-	-	-	Q94AM9|CID4_ARATH Polyadenylate-binding protein-interacting protein 4 OS=Arabidopsis thaliana OX=3702 GN=CID4 PE=2 SV=1 PF14438:Ataxin 2 SM domain	-
BjuVA09G09350	1.9492	1.83928	-	3.36875	O65351|SBT17_ARATH Subtilisin-like protease SBT1.7 OS=Arabidopsis thaliana OX=3702 GN=SBT1.7 PE=1 SV=1 PF00082:Subtilase family|PF17766:Fibronectin type-III domain|PF02225:PA domain|PF05922:Peptidase inhibitor I9	Peptidase_S8
BjuVA02G39200	1.32371	-	-	-	Q8RV79|SOT11_ARATH Cytosolic sulfotransferase 11 OS=Arabidopsis thaliana OX=3702 GN=SOT11 PE=2 SV=1 PF00685:Sulfotransferase domain	Sulfotransfer_1
BjuVB01G07090	1.40957	-	-	-	Q9SJL8|METK3_ARATH S-adenosylmethionine synthase 3 OS=Arabidopsis thaliana OX=3702 GN=METK3 PE=1 SV=1 PF02773:S-adenosylmethionine synthetase, C-terminal domain|PF00438:S-adenosylmethionine synthetase, N-terminal domain|PF02772:S-adenosylmethionine synthetase, central domain	-
BjuVA06G17900	2.91639	4.1096	5.26004	5.0558	Q8H113|DIN11_ARATH Probable 2-oxoglutarate-dependent dioxygenase DIN11 OS=Arabidopsis thaliana OX=3702 GN=DIN11 PE=2 SV=1 PF14226:non-haem dioxygenase in morphine synthesis N-terminal	-
BjuVB04G00320	-1.68382	-	1.4525	-	Q9FDW1|MYB44_ARATH Transcription factor MYB44 OS=Arabidopsis thaliana OX=3702 GN=MYB44 PE=1 SV=1 PF00249:Myb-like DNA-binding domain	Myb_DNA-binding
BjuVB04G05810	-1.27734	-	-	-	Q9ASS4|Y5838_ARATH Probably inactive leucine-rich repeat receptor-like protein kinase At5g48380 OS=Arabidopsis thaliana OX=3702 GN=At5g48380 PE=1 SV=1 PF07714:Protein tyrosine and serine/threonine kinase	Pkinase_Tyr
BjuVB08G52010	-1.37597	-	-	-	Q9SJM6|SAP4_ARATH Zinc finger A20 and AN1 domain-containing stress-associated protein 4 OS=Arabidopsis thaliana OX=3702 GN=SAP4 PE=1 SV=1 PF01428:AN1-like Zinc finger|PF01754:A20-like zinc finger	zf-AN1
BjuVB02G37990	1.89161	-	-	-	Q84WM9|EF1B1_ARATH Elongation factor 1-beta 1 OS=Arabidopsis thaliana OX=3702 GN=At5g12110 PE=2 SV=2 PF00736:EF-1 guanine nucleotide exchange domain	-
BjuVB04G31360	1.75526	2.63621	3.09952	3.98174	P52577|IFRH_ARATH Isoflavone reductase homolog P3 OS=Arabidopsis thaliana OX=3702 GN=At1g75280 PE=2 SV=1 PF05368:NmrA-like family	NmrA
BjuVA09G37860	-1.45889	-	-	-	Q9SGN6|NSL1_ARATH MACPF domain-containing protein NSL1 OS=Arabidopsis thaliana OX=3702 GN=NSL1 PE=2 SV=1 PF01823:MAC/Perforin domain	-
BjuVB01G16620	1.35427	-	-1.04036	-	Q7TMR0|PCP_MOUSE Lysosomal Pro-X carboxypeptidase OS=Mus musculus OX=10090 GN=Prcp PE=1 SV=2 PF05577:Serine carboxypeptidase S28	Peptidase_S28
BjuVA03G13210	1.7975	-	-	-	C0Z361|CPNB3_ARATH Chaperonin 60 subunit beta 3, chloroplastic OS=Arabidopsis thaliana OX=3702 GN=CPN60B3 PE=1 SV=1 PF00118:TCP-1/cpn60 chaperonin family	-
BjuVB05G18460	-2.52991	-	-	-	O81445|CNBL1_ARATH Calcineurin B-like protein 1 OS=Arabidopsis thaliana OX=3702 GN=CBL1 PE=1 SV=3 PF13202:EF hand	-
BjuVA04G23340	1.75466	-	-2.00244	-2.8161	P92994|TCMO_ARATH Trans-cinnamate 4-monooxygenase OS=Arabidopsis thaliana OX=3702 GN=CYP73A5 PE=1 SV=1 PF00067:Cytochrome P450	p450
BjuVB06G13510	1.85907	-	-	-	-	-
BjuVA09G65480	-1.91808	1.30893	1.58513	1.59651	O04036|ERD6_ARATH Sugar transporter ERD6 OS=Arabidopsis thaliana OX=3702 GN=ERD6 PE=1 SV=3 PF00083:Sugar (and other) transporter	Sugar_tr
BjuVA03G50890	-1.42584	-	-	-	O49403|HFA4A_ARATH Heat stress transcription factor A-4a OS=Arabidopsis thaliana OX=3702 GN=HSFA4A PE=1 SV=1 PF00447:HSF-type DNA-binding	HSF_DNA-bind
BjuVB07G04400	-4.07016	-	-	-	-	-
BjuVA06G01650	1.3456	2.43829	3.01169	3.12162	Q9M5W9|JAL6L_ARATH Myrosinase-binding protein 2 OS=Arabidopsis thaliana OX=3702 GN=MBP2 PE=2 SV=1 PF01419:Jacalin-like lectin domain	-
BjuVB07G16510	-1.6697	-	-	-	Q9FKZ1|DRL42_ARATH Probable disease resistance protein At5g66900 OS=Arabidopsis thaliana OX=3702 GN=At5g66900 PE=3 SV=1 PF13855:Leucine rich repeat|PF00931:NB-ARC domain|PF05659:Arabidopsis broad-spectrum mildew resistance protein RPW8	NB-ARC
BjuVB05G00560	1.56589	-2.97674	-3.72541	-3.60612	Q96348|INO1_BRANA Inositol-3-phosphate synthase OS=Brassica napus OX=3708 PE=2 SV=2 PF07994:Myo-inositol-1-phosphate synthase|PF01658:Myo-inositol-1-phosphate synthase	-
BjuVB06G48680	-2.04279	-	1.27764	-	Q9SV30|GATA8_ARATH GATA transcription factor 8 OS=Arabidopsis thaliana OX=3702 GN=GATA8 PE=1 SV=1 PF00320:GATA zinc finger	GATA
BjuVB03G37520	-1.64969	-	-	-	Q9SX31|PERK9_ARATH Proline-rich receptor-like protein kinase PERK9 OS=Arabidopsis thaliana OX=3702 GN=PERK9 PE=1 SV=1 PF00069:Protein kinase domain	Pkinase
BjuVA02G21350	-1.84015	-	-	-	PF04601:Domain of unknown function (DUF569)	-
BjuVA02G47740	1.22071	-	-	-	Q9FMK7|BT1_ARATH BTB/POZ and TAZ domain-containing protein 1 OS=Arabidopsis thaliana OX=3702 GN=BT1 PE=1 SV=1 PF02135:TAZ zinc finger|PF00651:BTB/POZ domain	BTB
BjuVA05G02880	-1.64312	-	-	-1.75077	F4IN23|BZP34_ARATH Basic leucine zipper 34 OS=Arabidopsis thaliana OX=3702 GN=BZIP34 PE=1 SV=1 PF00170:bZIP transcription factor	bZIP_1
BjuVB03G42790	-1.89886	-	-	-1.80767	O04529|2MMP_ARATH Metalloendoproteinase 2-MMP OS=Arabidopsis thaliana OX=3702 GN=2MMP PE=1 SV=1 PF01471:Putative peptidoglycan binding domain|PF00413:Matrixin	PG_binding_1
BjuVB08G26980	2.72341	-	-	-	O80982|HSFA2_ARATH Heat stress transcription factor A-2 OS=Arabidopsis thaliana OX=3702 GN=HSFA2 PE=1 SV=1 PF00447:HSF-type DNA-binding	HSF_DNA-bind
BjuVA01G17130	3.50158	-	-	-	Q96331|HS23M_ARATH 23.6 kDa heat shock protein, mitochondrial OS=Arabidopsis thaliana OX=3702 GN=HSP23.6 PE=2 SV=1 PF00011:Hsp20/alpha crystallin family	-
BjuVA08G17010	-1.63946	-	-	-	C6KIE6|XLG2_ARATH Extra-large guanine nucleotide-binding protein 2 OS=Arabidopsis thaliana OX=3702 GN=XLG2 PE=1 SV=1 PF00503:G-protein alpha subunit	G-alpha
BjuVA07G10160	-2.22934	-	-	-	O23461|ARAK_ARATH L-arabinokinase OS=Arabidopsis thaliana OX=3702 GN=ARA1 PE=1 SV=1 -	-
BjuVB04G47370	1.30131	1.73785	2.45405	2.79882	Q9M5W9|JAL6L_ARATH Myrosinase-binding protein 2 OS=Arabidopsis thaliana OX=3702 GN=MBP2 PE=2 SV=1 PF01419:Jacalin-like lectin domain	-
BjuVA09G16080	1.28553	-	-	-	Q5XEP2|HSOP2_ARATH Hsp70-Hsp90 organizing protein 2 OS=Arabidopsis thaliana OX=3702 GN=HOP2 PE=1 SV=1 PF13414:TPR repeat|PF00515:Tetratricopeptide repeat|PF17830:STI1 domain	TPR_1
BjuVA09G47830	-1.7474	-	-	-2.78696	Q9LY00|WRK70_ARATH Probable WRKY transcription factor 70 OS=Arabidopsis thaliana OX=3702 GN=WRKY70 PE=1 SV=1 PF03106:WRKY DNA -binding domain	WRKY
BjuVB05G32730	1.74593	-	-	-1.68991	-	-
BjuVA01G31980	-1.47715	-	-	-1.16432	O80695|DTX37_ARATH Protein DETOXIFICATION 37 OS=Arabidopsis thaliana OX=3702 GN=DTX37 PE=2 SV=1 PF01554:MatE	MatE
BjuVA05G39010	1.68994	-	-	-1.59545	Q9SS45|PAL4_ARATH Phenylalanine ammonia-lyase 4 OS=Arabidopsis thaliana OX=3702 GN=PAL4 PE=1 SV=1 PF00221:Aromatic amino acid lyase	-
BjuVA07G36560	-2.76847	-	-	-	PF04601:Domain of unknown function (DUF569)	-
BjuVB07G09950	-1.84425	-	-	-2.14518	Q9SSW2|AZF2_ARATH Zinc finger protein AZF2 OS=Arabidopsis thaliana OX=3702 GN=AZF2 PE=2 SV=1 PF13912:C2H2-type zinc finger	-
BjuVA06G05520	1.47549	-	-	-	O80488|PPR23_ARATH Pentatricopeptide repeat-containing protein At1g09190 OS=Arabidopsis thaliana OX=3702 GN=PCMP-E70 PE=2 SV=1 PF12854:PPR repeat|PF13041:PPR repeat family|PF00025:ADP-ribosylation factor family	Arf
BjuVB02G66430	-2.92773	-	-	-	Q42798|C93A1_SOYBN 3,9-dihydroxypterocarpan 6A-monooxygenase OS=Glycine max OX=3847 GN=CYP93A1 PE=1 SV=1 PF00067:Cytochrome P450	p450
BjuVB06G33290	2.33002	-	-	-	Q9M9S6|UTR3_ARATH UDP-galactose/UDP-glucose transporter 3 OS=Arabidopsis thaliana OX=3702 GN=UTR3 PE=1 SV=1 PF08449:UAA transporter family	-
BjuVA09G51970	1.88839	-	-	-	Q4P7F2|FES1_USTMA Hsp70 nucleotide exchange factor FES1 OS=Ustilago maydis (strain 521 / FGSC 9021) OX=237631 GN=FES1 PE=3 SV=2 PF08609:Nucleotide exchange factor Fes1	-
BjuVB03G24060	1.35062	-	-	-	P29197|CH60A_ARATH Chaperonin CPN60, mitochondrial OS=Arabidopsis thaliana OX=3702 GN=CPN60 PE=1 SV=2 PF00118:TCP-1/cpn60 chaperonin family	-
BjuVB08G49450	-1.73741	-	1.13496	-	Q9SN12|MYB77_ARATH Transcription factor MYB77 OS=Arabidopsis thaliana OX=3702 GN=MYB77 PE=1 SV=1 PF00249:Myb-like DNA-binding domain	Myb_DNA-binding
BjuVB07G28630	-1.80562	-	-2.39971	-1.4724	-	-
BjuVA04G09350	1.84956	-	-	-	Q8W4G6|CRK15_ARATH Cysteine-rich receptor-like protein kinase 15 OS=Arabidopsis thaliana OX=3702 GN=CRK15 PE=2 SV=2 PF01657:Salt stress response/antifungal	-
BjuVA05G40560	1.9876	-	-	-	F4JFN3|HS906_ARATH Heat shock protein 90-6, mitochondrial OS=Arabidopsis thaliana OX=3702 GN=HSP90-6 PE=1 SV=1 PF02518:Histidine kinase-, DNA gyrase B-, and HSP90-like ATPase|PF00183:Hsp90 protein	HATPase_c
BjuVB04G06060	-2.08308	-	-	-	P92983|PROD1_ARATH Proline dehydrogenase 1, mitochondrial OS=Arabidopsis thaliana OX=3702 GN=POX1 PE=1 SV=2 PF01619:Proline dehydrogenase	-
BjuVB02G38280	-1.7222	-	-	-	-	-
BjuVB08G07800	1.63681	-	-	-2.07497	Q8LBH4|SPX1_ARATH SPX domain-containing protein 1 OS=Arabidopsis thaliana OX=3702 GN=SPX1 PE=1 SV=2 PF03105:SPX domain	SPX
BjuVB02G61180	-1.31088	1.02062	-	-	P93031|GMD2_ARATH GDP-mannose 4,6 dehydratase 2 OS=Arabidopsis thaliana OX=3702 GN=MUR1 PE=1 SV=3 PF16363:GDP-mannose 4,6 dehydratase	-
BjuVB03G18050	-1.71322	-	1.3034	-	Q6R8G2|PHO18_ARATH Phosphate transporter PHO1 homolog 8 OS=Arabidopsis thaliana OX=3702 GN=PHO1-H8 PE=2 SV=1 PF03105:SPX domain|PF03124:EXS family	SPX
BjuVB05G13960	-1.34575	-	-	-	Q9ZP16|CRK11_ARATH Cysteine-rich receptor-like protein kinase 11 OS=Arabidopsis thaliana OX=3702 GN=CRK11 PE=2 SV=2 PF01657:Salt stress response/antifungal|PF07714:Protein tyrosine and serine/threonine kinase	Pkinase_Tyr
BjuVB08G35380	-1.18139	-	-	-1.18978	O80462|XLG1_ARATH Extra-large guanine nucleotide-binding protein 1 OS=Arabidopsis thaliana OX=3702 GN=XLG1 PE=1 SV=2 PF11331:Probable zinc-ribbon domain	-
BjuVA03G52750	-1.71809	-	-	-2.04509	Q42798|C93A1_SOYBN 3,9-dihydroxypterocarpan 6A-monooxygenase OS=Glycine max OX=3847 GN=CYP93A1 PE=1 SV=1 PF00067:Cytochrome P450	p450
BjuVA04G11560	-1.37713	-	-	-	Q8VYG0|LRL13_ARATH LEAF RUST 10 DISEASE-RESISTANCE LOCUS RECEPTOR-LIKE PROTEIN KINASE-like 1.3 OS=Arabidopsis thaliana OX=3702 GN=LRK10L-1.3 PE=2 SV=1 PF07714:Protein tyrosine and serine/threonine kinase|PF13947:Wall-associated receptor kinase galacturonan-binding|PF14380:Wall-associated receptor kinase C-terminal	Pkinase_Tyr
BjuV_Contig00581G00220	3.01733	2.67032	4.58109	-	PF04720:PDDEXK-like family of unknown function	-
BjuVA01G04350	-1.23716	-	-	-	Q8VZE9|U73B1_ARATH UDP-glycosyltransferase 73B1 OS=Arabidopsis thaliana OX=3702 GN=UGT73B1 PE=2 SV=1 PF00201:UDP-glucoronosyl and UDP-glucosyl transferase	UDPGT
BjuVB01G04900	-1.43177	-	-	-1.86203	O04203|HSPR2_ARATH Nematode resistance protein-like HSPRO2 OS=Arabidopsis thaliana OX=3702 GN=HSPRO2 PE=1 SV=1 PF07231:Hs1pro-1 N-terminus|PF07014:Hs1pro-1 protein C-terminus	-
BjuVA02G25480	-1.44173	-	1.37255	-	Q9SII6|PIX13_ARATH Probable serine/threonine-protein kinase PIX13 OS=Arabidopsis thaliana OX=3702 GN=PIX13 PE=1 SV=2 PF07714:Protein tyrosine and serine/threonine kinase	Pkinase_Tyr
BjuVB04G07740	2.47942	2.88158	3.09124	3.6109	Q9LIP3|C71BY_ARATH Cytochrome P450 71B37 OS=Arabidopsis thaliana OX=3702 GN=CYP71B37 PE=3 SV=2 PF00067:Cytochrome P450	p450
BjuVA07G38500	2.97088	6.71103	7.03848	7.86219	Q9C7S6|KTI2_ARATH Kunitz trypsin inhibitor 2 OS=Arabidopsis thaliana OX=3702 GN=KTI2 PE=1 SV=1 PF00197:Trypsin and protease inhibitor	-
BjuVB01G39840	1.7916	-1.87184	-	-	Q9LH79|SWET2_ARATH Bidirectional sugar transporter SWEET2 OS=Arabidopsis thaliana OX=3702 GN=SWEET2 PE=1 SV=1 PF03083:Sugar efflux transporter for intercellular exchange	-
BjuVA09G38530	1.22537	-	-	-	Q9C7F7|LTPG1_ARATH Non-specific lipid transfer protein GPI-anchored 1 OS=Arabidopsis thaliana OX=3702 GN=LTPG1 PE=2 SV=1 PF14368:Probable lipid transfer	-
BjuVA09G54580	-2.59585	-	-	-1.8633	Q9LZJ3|XXT1_ARATH Xyloglucan 6-xylosyltransferase 1 OS=Arabidopsis thaliana OX=3702 GN=XXT1 PE=1 SV=1 PF05637:galactosyl transferase GMA12/MNN10 family	-
BjuVA07G26530	-1.59069	1.13635	1.50344	-	Q9XIE2|AB36G_ARATH ABC transporter G family member 36 OS=Arabidopsis thaliana OX=3702 GN=ABCG36 PE=1 SV=1 PF01061:ABC-2 type transporter|PF19055:ABC-2 type transporter|PF08370:Plant PDR ABC transporter associated|PF00005:ABC transporter|PF14510:ABC-transporter N-terminal	ABC2_membrane
BjuVB01G20240	-1.5577	-	-	-	Q8RXN8|NRP_ARATH DCD domain-containing protein NRP OS=Arabidopsis thaliana OX=3702 GN=NRP PE=1 SV=1 PF10539:Development and cell death domain	-
BjuVB03G11130	2.19466	1.55368	2.99873	1.93692	P27061|PPA1_SOLLC Acid phosphatase 1 OS=Solanum lycopersicum OX=4081 GN=APS1 PE=2 SV=1 PF03767:HAD superfamily, subfamily IIIB (Acid phosphatase)	-
BjuVB06G47870	-2.69788	-	-	-1.84784	Q9LDH1|SIB1_ARATH Sigma factor binding protein 1, chloroplastic OS=Arabidopsis thaliana OX=3702 GN=SIB1 PE=1 SV=1 PF05678:VQ motif	-
BjuVA10G23730	-1.32516	-	-	-	Q9LF33|UGDH3_ARATH UDP-glucose 6-dehydrogenase 3 OS=Arabidopsis thaliana OX=3702 GN=UGD3 PE=1 SV=1 PF03721:UDP-glucose/GDP-mannose dehydrogenase family, NAD binding domain|PF03720:UDP-glucose/GDP-mannose dehydrogenase family, UDP binding domain|PF00984:UDP-glucose/GDP-mannose dehydrogenase family, central domain	-
BjuVB02G39450	-1.6241	-	-	-	Q9LX93|ATL55_ARATH E3 ubiquitin-protein ligase RING1 OS=Arabidopsis thaliana OX=3702 GN=ATL55 PE=1 SV=1 PF13639:Ring finger domain	-
BjuVA09G40240	-2.10488	-	-1.42367	-	Q93Z75|UPS5_ARATH Ureide permease 5 OS=Arabidopsis thaliana OX=3702 GN=UPS5 PE=1 SV=1 PF07168:Ureide permease	-
BjuVA02G19990	-1.65427	-	-	-	Q9M9C6|P2C15_ARATH Probable protein phosphatase 2C 15 OS=Arabidopsis thaliana OX=3702 GN=At1g68410 PE=2 SV=1 PF00481:Protein phosphatase 2C	PP2C
BjuV_Contig00907G00010	3.09252	-	-	-	F4HVY0|CER1_ARATH Very-long-chain aldehyde decarbonylase CER1 OS=Arabidopsis thaliana OX=3702 GN=CER1 PE=1 SV=1 PF12076:WAX2 C-terminal domain|PF04116:Fatty acid hydroxylase superfamily	-
BjuVB03G58260	-1.90296	-	-	-1.60086	P53990|IST1_HUMAN IST1 homolog OS=Homo sapiens OX=9606 GN=IST1 PE=1 SV=1 PF03398:Regulator of Vps4 activity in the MVB pathway	-
BjuVA02G08590	-1.24348	-	-	-	P24805|TSJT1_TOBAC Stem-specific protein TSJT1 OS=Nicotiana tabacum OX=4097 GN=TSJT1 PE=2 SV=1 PF12481:Aluminium induced protein	-
BjuVB06G56530	4.10412	3.76293	5.65021	7.11983	Q9LQ31|JAL4_ARATH Jacalin-related lectin 4 OS=Arabidopsis thaliana OX=3702 GN=JAL4 PE=2 SV=1 PF01419:Jacalin-like lectin domain	-
BjuVA08G29300	1.74468	-	-	-2.43355	Q8L9J7|SWET1_ARATH Bidirectional sugar transporter SWEET1 OS=Arabidopsis thaliana OX=3702 GN=SWEET1 PE=1 SV=1 PF03083:Sugar efflux transporter for intercellular exchange	-
BjuVA06G30240	1.98941	-	-	-	-	-
BjuVA05G08530	-1.21623	-	-	-	Q9ZUU2|PXL2C_ARATH Thioredoxin-like protein AAED1, chloroplastic OS=Arabidopsis thaliana OX=3702 GN=At2g37240 PE=1 SV=2 PF13911:AhpC/TSA antioxidant enzyme	-
BjuVA01G06260	-1.57188	-	-	-	-	-
BjuVA06G32100	-1.18225	-	-	-	-	-
BjuVA08G15540	2.2023	-	-	-	Q8VZ96|DER21_ARATH Derlin-2.1 OS=Arabidopsis thaliana OX=3702 GN=DER2.1 PE=2 SV=3 PF04511:Der1-like family	-
BjuVB04G36850	1.29251	-	-1.5246	-	Q9XF43|KCS6_ARATH 3-ketoacyl-CoA synthase 6 OS=Arabidopsis thaliana OX=3702 GN=CUT1 PE=1 SV=1 PF08392:FAE1/Type III polyketide synthase-like protein|PF08541:3-Oxoacyl-[acyl-carrier-protein (ACP)] synthase III C terminal	-
BjuVA08G21430	1.53415	-	-	-	Q94AH9|FBRL2_ARATH rRNA 2'-O-methyltransferase fibrillarin 2 OS=Arabidopsis thaliana OX=3702 GN=FIB2 PE=1 SV=2 PF01269:Fibrillarin	-
BjuVA02G21600	-1.35431	-	-	-	Q94CE4|BCA4_ARATH Beta carbonic anhydrase 4 OS=Arabidopsis thaliana OX=3702 GN=BCA4 PE=1 SV=1 PF00484:Carbonic anhydrase	-
BjuVA05G41290	-1.36135	-	-	-	Q9M8Z8|PLY8_ARATH Probable pectate lyase 8 OS=Arabidopsis thaliana OX=3702 GN=At3g07010 PE=2 SV=1 PF00544:Pectate lyase	-
BjuVA09G24450	1.43094	1.32575	-	-	Q9SIF2|HS905_ARATH Heat shock protein 90-5, chloroplastic OS=Arabidopsis thaliana OX=3702 GN=HSP90-5 PE=1 SV=1 PF02518:Histidine kinase-, DNA gyrase B-, and HSP90-like ATPase|PF00183:Hsp90 protein	HATPase_c
BjuVB06G00350	1.361	-	-	-	O22898|LACS1_ARATH Long chain acyl-CoA synthetase 1 OS=Arabidopsis thaliana OX=3702 GN=LACS1 PE=2 SV=1 PF00501:AMP-binding enzyme	AMP-binding
BjuVA02G38830	8.39249	-	-	6.96035	P42813|RNS1_ARATH Ribonuclease 1 OS=Arabidopsis thaliana OX=3702 GN=RNS1 PE=1 SV=1 PF00445:Ribonuclease T2 family	Ribonuclease_T2
BjuVB05G19920	1.3393	-	-	-	O23461|ARAK_ARATH L-arabinokinase OS=Arabidopsis thaliana OX=3702 GN=ARA1 PE=1 SV=1 PF10509:Galactokinase galactose-binding signature|PF00288:GHMP kinases N terminal domain	GHMP_kinases
BjuVA02G31460	1.2671	-	-	-	Q9SZX9|RL92_ARATH 60S ribosomal protein L9-2 OS=Arabidopsis thaliana OX=3702 GN=RPL9D PE=2 SV=1 PF00347:Ribosomal protein L6	-
BjuVA03G31110	1.99185	-	-	-	Q9M156|U72B1_ARATH UDP-glycosyltransferase 72B1 OS=Arabidopsis thaliana OX=3702 GN=UGT72B1 PE=1 SV=1 PF00201:UDP-glucoronosyl and UDP-glucosyl transferase	UDPGT
BjuVB08G52360	1.40873	-	-	-	P45724|PAL2_ARATH Phenylalanine ammonia-lyase 2 OS=Arabidopsis thaliana OX=3702 GN=PAL2 PE=1 SV=2 PF00221:Aromatic amino acid lyase	-
BjuVA08G17380	-1.83896	-	-	-	O81760|P2C63_ARATH Probable protein phosphatase 2C 63 OS=Arabidopsis thaliana OX=3702 GN=At4g33920 PE=2 SV=1 PF00481:Protein phosphatase 2C	PP2C
BjuVA01G39280	-1.32316	-	-	-	Q9SUI7|PSAH1_ARATH Photosystem I reaction center subunit VI-1, chloroplastic OS=Arabidopsis thaliana OX=3702 GN=PSAH1 PE=2 SV=1 PF03244:Photosystem I reaction centre subunit VI	-
BjuVA02G48310	-2.01444	-	-	-	-	-
BjuVB02G74090	-2.10219	-	-	1.46068	F4JNX2|SDEH4_ARATH Senescence/dehydration-associated protein At4g35985, chloroplastic OS=Arabidopsis thaliana OX=3702 GN=P85 PE=2 SV=1 PF00071:Ras family|PF06911:Senescence-associated protein	Ras
BjuV_Contig01022G00150	1.52817	1.34819	-	-	F4JFN3|HS906_ARATH Heat shock protein 90-6, mitochondrial OS=Arabidopsis thaliana OX=3702 GN=HSP90-6 PE=1 SV=1 PF00183:Hsp90 protein|PF02518:Histidine kinase-, DNA gyrase B-, and HSP90-like ATPase	HATPase_c
BjuVB06G50100	2.23591	3.34323	3.91165	4.35081	PF00917:MATH domain	MATH
BjuVA07G07370	3.51798	2.88508	3.62888	4.27677	Q67XN2|BGL08_ARATH Beta-glucosidase 8 OS=Arabidopsis thaliana OX=3702 GN=BGLU8 PE=2 SV=1 PF00232:Glycosyl hydrolase family 1	Glyco_hydro_1
BjuVB07G05440	-2.36482	-	-	-	P05100|3MG1_ECOLI DNA-3-methyladenine glycosylase 1 OS=Escherichia coli (strain K12) OX=83333 GN=tag PE=1 SV=1 PF03352:Methyladenine glycosylase	-
BjuVA03G12810	-1.38081	-	-	-	Q9LU76|NSTU1_ARATH Nucleotide-sugar uncharacterized transporter 1 OS=Arabidopsis thaliana OX=3702 GN=At5g57100 PE=2 SV=1 PF03151:Triose-phosphate Transporter family	-
BjuVB03G46470	-1.18937	-	-	-	Q8GYA4|CRK10_ARATH Cysteine-rich receptor-like protein kinase 10 OS=Arabidopsis thaliana OX=3702 GN=CRK10 PE=1 SV=3 PF07714:Protein tyrosine and serine/threonine kinase	Pkinase_Tyr
BjuVA01G40420	-1.92542	-	-	1.78546	Q93XX4|C2D61_ARATH C2 domain-containing protein At1g53590 OS=Arabidopsis thaliana OX=3702 GN=NTMC2T6.1 PE=1 SV=2 PF00168:C2 domain	C2
BjuVA05G29250	-1.78037	-	-	-1.64827	Q2TBP5|TMM53_BOVIN Transmembrane protein 53 OS=Bos taurus OX=9913 GN=TMEM53 PE=2 SV=1 PF05705:Eukaryotic protein of unknown function (DUF829)	-
BjuVB02G56330	-1.88836	1.47764	1.5303	-	-	-
BjuVA04G29830	-2.21433	-	1.77665	1.61687	Q9C942|CSE_ARATH Caffeoylshikimate esterase OS=Arabidopsis thaliana OX=3702 GN=CSE PE=1 SV=1 PF12146:Serine aminopeptidase, S33	-
BjuVB08G28370	-1.52576	-	-	1.26698	-	-
BjuVB08G53060	-1.41441	-	-	-	Q55EX9|Y8948_DICDI Putative methyltransferase DDB_G0268948 OS=Dictyostelium discoideum OX=44689 GN=DDB_G0268948 PE=1 SV=2 PF08241:Methyltransferase domain	Methyltransf_11
BjuVB04G01840	1.44668	-	-2.19277	-	Q9FMK7|BT1_ARATH BTB/POZ and TAZ domain-containing protein 1 OS=Arabidopsis thaliana OX=3702 GN=BT1 PE=1 SV=1 PF02135:TAZ zinc finger|PF00651:BTB/POZ domain	zf-TAZ
BjuVA05G39980	2.57633	-	-	-	Q9SR96|DNJ63_ARATH DnaJ protein ERDJ3A OS=Arabidopsis thaliana OX=3702 GN=ERDJ3A PE=1 SV=1 PF00226:DnaJ domain	DnaJ
BjuVA09G25770	1.76167	2.24594	-	-	P92979|APR1_ARATH 5'-adenylylsulfate reductase 1, chloroplastic OS=Arabidopsis thaliana OX=3702 GN=APR1 PE=1 SV=2 PF00085:Thioredoxin|PF01507:Phosphoadenosine phosphosulfate reductase family	-
BjuVB04G31520	-1.73665	-	-	-	Q9FXH5|PUP14_ARATH Purine permease 14 OS=Arabidopsis thaliana OX=3702 GN=PUP14 PE=1 SV=1 PF16913:Purine nucleobase transmembrane transport	-
BjuVB04G14340	-2.04486	-	-	-	Q9LTC0|PBL19_ARATH Probable serine/threonine-protein kinase PBL19 OS=Arabidopsis thaliana OX=3702 GN=PBL19 PE=1 SV=1 PF07714:Protein tyrosine and serine/threonine kinase	Pkinase_Tyr
BjuVB06G01960	1.65956	-	-	-	P0CD61|GPT_DICDI UDP-N-acetylglucosamine--dolichyl-phosphate N-acetylglucosaminephosphotransferase OS=Dictyostelium discoideum OX=44689 GN=alg7 PE=3 SV=1 PF00953:Glycosyl transferase family 4	Glycos_transf_4
BjuVB02G00190	-2.63256	1.2686	1.91007	1.65235	P0DO21|GIP2_NICBE Probable aspartic proteinase GIP2 OS=Nicotiana benthamiana OX=4100 GN=GIP2 PE=1 SV=1 PF14543:Xylanase inhibitor N-terminal|PF14541:Xylanase inhibitor C-terminal	-
BjuVA08G07650	1.5808	-	-	-	Q5M7D4|CNPY1_XENLA Protein canopy homolog 1 OS=Xenopus laevis OX=8355 GN=cnpy1 PE=2 SV=1 PF11938:TLR4 regulator and MIR-interacting MSAP	-
BjuVB05G29770	-1.59328	-	-	-	Q9LTE1|HIP14_ARATH Heavy metal-associated isoprenylated plant protein 14 OS=Arabidopsis thaliana OX=3702 GN=HIPP14 PE=2 SV=1 PF00403:Heavy-metal-associated domain	HMA
BjuVB01G01110	-1.32633	-	1.27729	2.14049	O80837|REMO_ARATH Remorin OS=Arabidopsis thaliana OX=3702 GN=DBP PE=1 SV=1 PF03766:Remorin, N-terminal region|PF03763:Remorin, C-terminal region	-
BjuVA05G12350	1.40683	-	-	-	O48773|PDI23_ARATH Protein disulfide-isomerase 2-3 OS=Arabidopsis thaliana OX=3702 GN=PDIL2-3 PE=2 SV=1 PF00085:Thioredoxin	-
BjuVA02G00060	-3.05655	-	1.28778	-	Q9LZV6|WRK62_ARATH Probable WRKY transcription factor 62 OS=Arabidopsis thaliana OX=3702 GN=WRKY62 PE=1 SV=2 PF03106:WRKY DNA -binding domain	WRKY
BjuVA06G27020	-1.95538	-	-	-	Q9SCK6|NAC62_ARATH NAC domain-containing protein 62 OS=Arabidopsis thaliana OX=3702 GN=NAC062 PE=1 SV=1 PF02365:No apical meristem (NAM) protein	NAM
BjuVB06G05880	-1.46656	-	-	-2.89843	Q9XEE6|C3H29_ARATH Zinc finger CCCH domain-containing protein 29 OS=Arabidopsis thaliana OX=3702 GN=At2g40140 PE=1 SV=1 PF13637:Ankyrin repeats (many copies)	-
BjuVB05G32280	1.62586	1.35656	-	-	Q9FG73|NOP2A_ARATH 25S rRNA (cytosine-C(5))-methyltransferase NOP2A OS=Arabidopsis thaliana OX=3702 GN=NOP2A PE=1 SV=1 PF17125:N-terminal domain of 16S rRNA methyltransferase RsmF|PF01189:16S rRNA methyltransferase RsmB/F	-
BjuVB05G11650	1.83124	1.82085	-	-	Q93ZG9|FKB53_ARATH Peptidyl-prolyl cis-trans isomerase FKBP53 OS=Arabidopsis thaliana OX=3702 GN=FKBP53 PE=1 SV=1 PF17800:Nucleoplasmin-like domain|PF00254:FKBP-type peptidyl-prolyl cis-trans isomerase	FKBP_C
BjuVB06G55250	-4.62071	-	-	-	Q9LDH1|SIB1_ARATH Sigma factor binding protein 1, chloroplastic OS=Arabidopsis thaliana OX=3702 GN=SIB1 PE=1 SV=1 PF05678:VQ motif	-
BjuVA09G19770	1.19459	-	-	-	P17094|RL31_ARATH 60S ribosomal protein L3-1 OS=Arabidopsis thaliana OX=3702 GN=ARP1 PE=1 SV=5 PF00297:Ribosomal protein L3	-
BjuVB03G36940	-1.66223	-	-	-1.45878	PF04601:Domain of unknown function (DUF569)	-
BjuVB05G17090	-1.40669	-	-	-	PF13369:Transglutaminase-like superfamily	-
BjuVA03G60110	-1.43959	-	-	-	P48002|KNAT5_ARATH Homeobox protein knotted-1-like 5 OS=Arabidopsis thaliana OX=3702 GN=KNAT5 PE=1 SV=2 PF05920:Homeobox KN domain|PF03789:ELK domain|PF03790:KNOX1 domain|PF03791:KNOX2 domain	KNOX2
BjuVA03G23220	2.84103	-	-	-	Q42512|CR15A_ARATH Protein COLD-REGULATED 15A, chloroplastic OS=Arabidopsis thaliana OX=3702 GN=COR15A PE=1 SV=1 -	-
BjuVA09G22480	1.68566	-	-1.6485	-	-	-
BjuVA03G63360	-1.34504	-	-	-	-	-
BjuVA06G02010	-1.24846	-	-	-	Q39195|PST2_ARATH Photosystem II 5 kDa protein, chloroplastic OS=Arabidopsis thaliana OX=3702 GN=PSBT PE=3 SV=2 -	-
BjuVB07G18640	-1.89676	-	-	-	Q24JK1|MYB96_ARATH Transcription factor MYB96 OS=Arabidopsis thaliana OX=3702 GN=MYB96 PE=2 SV=1 PF00249:Myb-like DNA-binding domain	Myb_DNA-binding
BjuVB07G06680	-1.35271	-	-	-	Q9LUL4|SRF7_ARATH Protein STRUBBELIG-RECEPTOR FAMILY 7 OS=Arabidopsis thaliana OX=3702 GN=SRF7 PE=1 SV=1 PF08263:Leucine rich repeat N-terminal domain|PF07714:Protein tyrosine and serine/threonine kinase	Pkinase_Tyr
BjuVA08G03840	-2.12217	-	-	-	O48716|JGB_ARATH Protein JINGUBANG OS=Arabidopsis thaliana OX=3702 GN=JGB PE=1 SV=1 -	-
BjuVA04G08710	1.24811	-	-1.08096	-	O23254|GLYC4_ARATH Serine hydroxymethyltransferase 4 OS=Arabidopsis thaliana OX=3702 GN=SHM4 PE=1 SV=1 PF00464:Serine hydroxymethyltransferase	SHMT
BjuVB01G39740	-1.35842	-	-	1.33144	C0LGN2|Y3148_ARATH Probable leucine-rich repeat receptor-like serine/threonine-protein kinase At3g14840 OS=Arabidopsis thaliana OX=3702 GN=LRR-RLK PE=1 SV=1 PF11721:Malectin domain|PF07714:Protein tyrosine and serine/threonine kinase	Pkinase_Tyr
BjuVA04G30260	-1.23239	-	-	-1.81094	O04203|HSPR2_ARATH Nematode resistance protein-like HSPRO2 OS=Arabidopsis thaliana OX=3702 GN=HSPRO2 PE=1 SV=1 PF07231:Hs1pro-1 N-terminus|PF07014:Hs1pro-1 protein C-terminus	-
BjuVA09G48310	-1.62882	-	-	-	-	-
BjuVA02G03240	3.10131	-	3.51549	5.01006	Q9FY71|EXOL4_ARATH Protein EXORDIUM-like 4 OS=Arabidopsis thaliana OX=3702 GN=EXL4 PE=2 SV=1 PF04674:Phosphate-induced protein 1 conserved region	-
BjuVA07G26520	1.05932	2.69999	2.86456	3.31228	P38418|LOX2_ARATH Lipoxygenase 2, chloroplastic OS=Arabidopsis thaliana OX=3702 GN=LOX2 PE=1 SV=1 PF00305:Lipoxygenase	Lipoxygenase
BjuVA06G38450	-1.41637	-	-	-	Q9FIJ0|RBOHD_ARATH Respiratory burst oxidase homolog protein D OS=Arabidopsis thaliana OX=3702 GN=RBOHD PE=1 SV=1 PF08414:Respiratory burst NADPH oxidase|PF08022:FAD-binding domain|PF08030:Ferric reductase NAD binding domain|PF01794:Ferric reductase like transmembrane component	FAD_binding_8
BjuVB02G01120	-1.45548	-	-	-	F4KHA2|RLP54_ARATH Receptor-like protein 54 OS=Arabidopsis thaliana OX=3702 GN=RLP54 PE=3 SV=1 PF13855:Leucine rich repeat	-
BjuVA07G40280	-1.63563	-	-	-	Q9CA75|XXT5_ARATH Probable xyloglucan 6-xylosyltransferase 5 OS=Arabidopsis thaliana OX=3702 GN=XXT5 PE=1 SV=1 PF05637:galactosyl transferase GMA12/MNN10 family	-
BjuVB07G19630	-1.65853	-	-1.29648	-	O82587|SWT12_ARATH Bidirectional sugar transporter SWEET12 OS=Arabidopsis thaliana OX=3702 GN=SWEET12 PE=1 SV=1 PF03083:Sugar efflux transporter for intercellular exchange	-
BjuVA01G39270	-2.84815	-2.5756	-3.41424	-2.4168	Q8GXG1|ASPGB_ARATH Probable isoaspartyl peptidase/L-asparaginase 2 OS=Arabidopsis thaliana OX=3702 GN=At3g16150 PE=2 SV=2 PF01112:Asparaginase	Asparaginase_2
BjuVB05G11470	1.26997	1.17306	-	-	Q9FEF8|FBRL1_ARATH rRNA 2'-O-methyltransferase fibrillarin 1 OS=Arabidopsis thaliana OX=3702 GN=FIB1 PE=1 SV=1 PF01269:Fibrillarin	-
BjuVB01G35040	-1.69119	-	-	-1.92031	Q9SSW2|AZF2_ARATH Zinc finger protein AZF2 OS=Arabidopsis thaliana OX=3702 GN=AZF2 PE=2 SV=1 PF13912:C2H2-type zinc finger	-
BjuVB06G57920	-1.84707	-	-	-	Q9SAH7|WRK40_ARATH Probable WRKY transcription factor 40 OS=Arabidopsis thaliana OX=3702 GN=WRKY40 PE=1 SV=1 PF03106:WRKY DNA -binding domain	WRKY
BjuVA06G48140	1.32067	-1.19204	-	-	PF13499:EF-hand domain pair	-
BjuVB02G58250	-1.42981	-	-	-1.88254	O49403|HFA4A_ARATH Heat stress transcription factor A-4a OS=Arabidopsis thaliana OX=3702 GN=HSFA4A PE=1 SV=1 PF00447:HSF-type DNA-binding	HSF_DNA-bind
BjuVA01G04230	-1.33393	-	-	-	Q8W033|AL3I1_ARATH Aldehyde dehydrogenase family 3 member I1, chloroplastic OS=Arabidopsis thaliana OX=3702 GN=ALDH3I1 PE=1 SV=2 PF00171:Aldehyde dehydrogenase family	Aldedh
BjuVA03G39210	-2.39558	-	-	-2.30519	Q8L9T5|ATL2_ARATH RING-H2 finger protein ATL2 OS=Arabidopsis thaliana OX=3702 GN=ATL2 PE=2 SV=2 PF13639:Ring finger domain	-
BjuVB05G04060	-1.21707	-	-	-	Q8VZE9|U73B1_ARATH UDP-glycosyltransferase 73B1 OS=Arabidopsis thaliana OX=3702 GN=UGT73B1 PE=2 SV=1 PF00201:UDP-glucoronosyl and UDP-glucosyl transferase	UDPGT
BjuVA05G01400	-2.51633	-	-	-	Q9SKD9|WRK46_ARATH Probable WRKY transcription factor 46 OS=Arabidopsis thaliana OX=3702 GN=WRKY46 PE=1 SV=1 PF03106:WRKY DNA -binding domain	WRKY
BjuVB08G13820	-2.16285	-	1.38122	-	Q9LTE1|HIP14_ARATH Heavy metal-associated isoprenylated plant protein 14 OS=Arabidopsis thaliana OX=3702 GN=HIPP14 PE=2 SV=1 -	-
BjuVB03G24470	1.51619	-	-	-	Q96539|CH10_BRANA 10 kDa chaperonin OS=Brassica napus OX=3708 PE=3 SV=1 -	-
BjuVB07G40400	1.70876	-	-	-	Q84WV0|GLYC7_ARATH Serine hydroxymethyltransferase 7 OS=Arabidopsis thaliana OX=3702 GN=SHM7 PE=2 SV=1 PF00464:Serine hydroxymethyltransferase	SHMT
BjuVB01G43800	1.69518	-	-	-1.7663	Q9SS45|PAL4_ARATH Phenylalanine ammonia-lyase 4 OS=Arabidopsis thaliana OX=3702 GN=PAL4 PE=1 SV=1 PF00221:Aromatic amino acid lyase	-
BjuVB06G07350	-1.34734	-	-	-	Q9M6N7|AMT2_ARATH Ammonium transporter 2 OS=Arabidopsis thaliana OX=3702 GN=AMT2 PE=1 SV=2 PF00909:Ammonium Transporter Family	Ammonium_transp
BjuVB01G33500	-1.99989	1.6001	1.67532	1.76379	Q56YN3|NADK1_ARATH NAD(H) kinase 1 OS=Arabidopsis thaliana OX=3702 GN=NADK1 PE=1 SV=2 PF01513:ATP-NAD kinase	NAD_kinase
BjuVB05G31340	-2.99415	-	1.88188	-2.5126	Q9LSQ6|PBP1_ARATH Calcium-binding protein PBP1 OS=Arabidopsis thaliana OX=3702 GN=PBP1 PE=1 SV=1 PF13833:EF-hand domain pair	-
BjuVB01G45030	-1.71095	-	1.8287	-	Q39030|KPK2_ARATH Serine/threonine-protein kinase AtPK2/AtPK19 OS=Arabidopsis thaliana OX=3702 GN=ATPK2 PE=1 SV=2 PF00069:Protein kinase domain	Pkinase
BjuVB07G32240	5.88636	3.24256	8.2386	8.88373	Q09023|CHI2_BRANA Endochitinase CH25 OS=Brassica napus OX=3708 PE=2 SV=1 PF00182:Chitinase class I|PF00187:Chitin recognition protein	-
BjuVA09G02350	1.80878	-	1.60367	3.37885	Q9ZNS2|GH310_ARATH Indole-3-acetic acid-amido synthetase GH3.10 OS=Arabidopsis thaliana OX=3702 GN=GH3.10 PE=2 SV=1 PF03321:GH3 auxin-responsive promoter	-
BjuVA04G07970	1.6553	-	-	-	PF05514:HR-like lesion-inducing	-
BjuVA09G26270	1.64357	1.48282	-	-	Q5XH16|NH2L1_XENLA NHP2-like protein 1 OS=Xenopus laevis OX=8355 GN=snu13 PE=2 SV=1 PF01248:Ribosomal protein L7Ae/L30e/S12e/Gadd45 family	-
BjuVA07G39760	-1.29736	-	-	-	Q8GYA4|CRK10_ARATH Cysteine-rich receptor-like protein kinase 10 OS=Arabidopsis thaliana OX=3702 GN=CRK10 PE=1 SV=3 PF07714:Protein tyrosine and serine/threonine kinase	Pkinase_Tyr
BjuVB07G19940	-1.37713	-	-	-	Q9FIM9|CAMK4_ARATH CDPK-related kinase 4 OS=Arabidopsis thaliana OX=3702 GN=CRK4 PE=1 SV=1 PF00069:Protein kinase domain	Pkinase
BjuVB06G21820	1.29647	-	-	-	O48773|PDI23_ARATH Protein disulfide-isomerase 2-3 OS=Arabidopsis thaliana OX=3702 GN=PDIL2-3 PE=2 SV=1 PF00085:Thioredoxin	-
BjuVA03G61900	-1.61366	-	-	-1.74326	Q25AG5|ERG3_ORYSI Elicitor-responsive protein 3 OS=Oryza sativa subsp. indica OX=39946 GN=ERG3 PE=2 SV=1 PF00168:C2 domain	C2
BjuVB08G05200	-1.77373	-	-	-	P46690|GASA4_ARATH Gibberellin-regulated protein 4 OS=Arabidopsis thaliana OX=3702 GN=GASA4 PE=1 SV=2 PF02704:Gibberellin regulated protein	-
BjuVB03G34380	-2.14427	-	1.23019	-	PF04398:Protein of unknown function, DUF538	-
BjuVA05G00510	1.2373	-	-	-	O22263|PDI21_ARATH Protein disulfide-isomerase like 2-1 OS=Arabidopsis thaliana OX=3702 GN=PDIL2-1 PE=2 SV=1 PF00085:Thioredoxin|PF07749:Endoplasmic reticulum protein ERp29, C-terminal domain	-
BjuVA01G12590	-1.11898	-	-	-	Q9SVG4|RETOL_ARATH Berberine bridge enzyme-like 19 OS=Arabidopsis thaliana OX=3702 GN=At4g20830 PE=1 SV=2 PF01565:FAD binding domain|PF08031:Berberine and berberine like	FAD_binding_4
BjuVB01G31300	1.14601	-	-	-	Q9LIK9|APS1_ARATH ATP sulfurylase 1, chloroplastic OS=Arabidopsis thaliana OX=3702 GN=APS1 PE=1 SV=1 PF01747:ATP-sulfurylase|PF14306:PUA-like domain	-
BjuVB05G53400	-1.91358	-	1.34544	-	Q5XF79|PBL18_ARATH Probable serine/threonine-protein kinase PBL18 OS=Arabidopsis thaliana OX=3702 GN=PBL18 PE=2 SV=1 PF07714:Protein tyrosine and serine/threonine kinase	Pkinase_Tyr
BjuVA01G02370	-2.30209	-	-	-2.31829	O23225|PUB5_ARATH U-box domain-containing protein 5 OS=Arabidopsis thaliana OX=3702 GN=PUB5 PE=3 SV=3 PF04564:U-box domain	U-box
BjuVB02G20770	-2.50169	-	-	-	Q9FJ93|DRE1D_ARATH Dehydration-responsive element-binding protein 1D OS=Arabidopsis thaliana OX=3702 GN=DREB1D PE=2 SV=1 PF00847:AP2 domain	AP2
BjuVB03G42680	1.30627	-	-	-	Q8H1Y0|ODPA2_ARATH Pyruvate dehydrogenase E1 component subunit alpha-2, mitochondrial OS=Arabidopsis thaliana OX=3702 GN=IAR4 PE=1 SV=2 PF00676:Dehydrogenase E1 component	-
BjuVB02G59140	-3.31065	-	-	-	Q9SYX1|LIL31_ARATH Light-harvesting complex-like protein 3 isotype 1, chloroplastic OS=Arabidopsis thaliana OX=3702 GN=LIL3.1 PE=1 SV=1 -	-
BjuVA02G16460	1.6965	-	-	1.46781	Q9FLX9|NLE1_ARATH Notchless protein homolog OS=Arabidopsis thaliana OX=3702 GN=NLE1 PE=2 SV=1 PF08154:NLE (NUC135) domain|PF00400:WD domain, G-beta repeat	WD40
BjuVA02G28860	3.08716	-	-	-	O23066|C86A2_ARATH Cytochrome P450 86A2 OS=Arabidopsis thaliana OX=3702 GN=CYP86A2 PE=1 SV=1 PF00067:Cytochrome P450	p450
BjuVB03G03130	-1.33105	-	1.15057	1.21055	P94014|GL21_ARATH Germin-like protein subfamily 2 member 1 OS=Arabidopsis thaliana OX=3702 GN=GLP4 PE=2 SV=2 PF00190:Cupin	-
BjuVB06G31820	1.36712	1.35967	-	1.29636	Q43295|APK1_ARATH Adenylyl-sulfate kinase 1, chloroplastic OS=Arabidopsis thaliana OX=3702 GN=APK1 PE=1 SV=1 PF01583:Adenylylsulphate kinase	-
BjuVB01G06880	1.30545	-	-2.04479	-2.75193	P35510|PAL1_ARATH Phenylalanine ammonia-lyase 1 OS=Arabidopsis thaliana OX=3702 GN=PAL1 PE=1 SV=3 PF00221:Aromatic amino acid lyase	-
BjuVA08G01780	-1.53329	-	-	-1.85197	Q9MAI5|ERF79_ARATH Ethylene-responsive transcription factor 8 OS=Arabidopsis thaliana OX=3702 GN=ERF8 PE=1 SV=1 PF00847:AP2 domain	AP2
BjuVA06G25400	-1.53857	-	-	-	Q9M290|NAC61_ARATH Putative NAC domain-containing protein 61 OS=Arabidopsis thaliana OX=3702 GN=NAC061 PE=3 SV=1 PF02365:No apical meristem (NAM) protein	NAM
BjuVB04G26270	-1.73267	-	1.11153	-	PF14364:Domain of unknown function (DUF4408)	-
BjuVB03G06000	3.19555	-	-	-	Q96539|CH10_BRANA 10 kDa chaperonin OS=Brassica napus OX=3708 PE=3 SV=1 -	-
BjuVA09G36620	1.73291	-	-	-	Q6AYK6|CYBP_RAT Calcyclin-binding protein OS=Rattus norvegicus OX=10116 GN=Cacybp PE=1 SV=1 PF09032:Siah interacting protein, N terminal|PF04969:CS domain	-
BjuVB02G72010	-1.449	-	-	-1.40985	-	-
BjuVB05G11200	-1.47219	1.17958	1.21719	1.40848	Q40784|AAPC_CENCI Putative glucose-6-phosphate 1-epimerase OS=Cenchrus ciliaris OX=35872 PE=2 SV=1 PF01263:Aldose 1-epimerase	Aldose_epim
BjuVA09G43020	-2.70614	-	1.15882	-	Q9SFE4|ERF12_ARATH Ethylene-responsive transcription factor ERF012 OS=Arabidopsis thaliana OX=3702 GN=ERF012 PE=2 SV=1 PF00847:AP2 domain	AP2
BjuVA03G02750	8.01948	-	-	-	Q8L5A7|SOT15_ARATH Cytosolic sulfotransferase 15 OS=Arabidopsis thaliana OX=3702 GN=SOT15 PE=1 SV=1 PF00685:Sulfotransferase domain	Sulfotransfer_1
BjuVA01G41110	-2.71468	-	-	-	Q9LIC6|PR1F3_ARATH PRA1 family protein F3 OS=Arabidopsis thaliana OX=3702 GN=PRA1F3 PE=1 SV=1 PF03208:PRA1 family protein	-
BjuVB02G75530	1.25732	-	-	-	P42734|CADH9_ARATH Probable cinnamyl alcohol dehydrogenase 9 OS=Arabidopsis thaliana OX=3702 GN=CAD9 PE=2 SV=2 PF00107:Zinc-binding dehydrogenase|PF08240:Alcohol dehydrogenase GroES-like domain	ADH_N
BjuVB03G23890	1.29554	-	-	2.53638	Q9LIS3|GAE6_ARATH UDP-glucuronate 4-epimerase 6 OS=Arabidopsis thaliana OX=3702 GN=GAE6 PE=1 SV=1 PF16363:GDP-mannose 4,6 dehydratase	-
BjuVA03G02710	1.75499	2.70048	3.36556	2.78811	Q9M5J8|PGIP2_ARATH Polygalacturonase inhibitor 2 OS=Arabidopsis thaliana OX=3702 GN=PGIP2 PE=2 SV=2 PF13855:Leucine rich repeat|PF08263:Leucine rich repeat N-terminal domain	LRRNT_2
BjuVA09G05830	3.6196	-	-	-	Q08298|RD22_ARATH BURP domain protein RD22 OS=Arabidopsis thaliana OX=3702 GN=RD22 PE=2 SV=1 PF03181:BURP domain	-
BjuVB07G47390	-1.3559	-	-	-2.03376	O82155|DOF17_ARATH Dof zinc finger protein DOF1.7 OS=Arabidopsis thaliana OX=3702 GN=DOF1.7 PE=2 SV=1 PF02701:Dof domain, zinc finger	zf-Dof
BjuVB02G57450	2.29277	-	-	2.494	Q84MA5|CAAT1_ARATH Cationic amino acid transporter 1 OS=Arabidopsis thaliana OX=3702 GN=CAT1 PE=1 SV=1 PF13520:Amino acid permease|PF13906:C-terminus of AA_permease	-
BjuVA09G48270	-1.3952	-	-	-	Q9LY50|ACCR3_ARATH Putative serine/threonine-protein kinase-like protein CCR3 OS=Arabidopsis thaliana OX=3702 GN=CCR3 PE=2 SV=1 PF13540:Regulator of chromosome condensation (RCC1) repeat|PF00069:Protein kinase domain	Pkinase
BjuVA06G00570	1.06256	-	-	-	Q9S7C0|HSP7O_ARATH Heat shock 70 kDa protein 14 OS=Arabidopsis thaliana OX=3702 GN=HSP70-14 PE=1 SV=1 PF00012:Hsp70 protein	HSP70
BjuVA08G30920	-1.64388	-	-	-	Q9LE73|NUDT4_ARATH Nudix hydrolase 4 OS=Arabidopsis thaliana OX=3702 GN=NUDT4 PE=1 SV=1 PF00293:NUDIX domain	NUDIX
BjuVA03G49750	1.33724	-	-	-	O23515|RL151_ARATH 60S ribosomal protein L15-1 OS=Arabidopsis thaliana OX=3702 GN=RPL15A PE=2 SV=1 PF00827:Ribosomal L15	-
BjuVB08G48070	1.82039	-	-	-	Q9FFQ7|FACT_ARATH Fatty alcohol:caffeoyl-CoA acyltransferase OS=Arabidopsis thaliana OX=3702 GN=FACT PE=2 SV=1 PF02458:Transferase family	-
BjuVA02G27880	-1.73536	-	1.68157	-	Q9SAH7|WRK40_ARATH Probable WRKY transcription factor 40 OS=Arabidopsis thaliana OX=3702 GN=WRKY40 PE=1 SV=1 PF03106:WRKY DNA -binding domain	WRKY
BjuVA08G32970	-1.49827	-	-	-	PF04724:Glycosyltransferase family 17	-
BjuVA07G40210	2.30998	-	-2.98121	-	P42730|CLPB1_ARATH Chaperone protein ClpB1 OS=Arabidopsis thaliana OX=3702 GN=CLPB1 PE=1 SV=2 PF02861:Clp amino terminal domain, pathogenicity island component|PF07724:AAA domain (Cdc48 subfamily)|PF17871:AAA lid domain|PF10431:C-terminal, D2-small domain, of ClpB protein|PF00004:ATPase family associated with various cellular activities (AAA)	AAA
BjuVA03G26470	-1.66642	-	-	-1.76914	PF07816:Protein of unknown function (DUF1645)	-
BjuVB06G27210	1.83658	1.53218	2.60869	3.37854	O04373|ILL4_ARATH IAA-amino acid hydrolase ILR1-like 4 OS=Arabidopsis thaliana OX=3702 GN=ILL4 PE=1 SV=2 PF01546:Peptidase family M20/M25/M40|PF07687:Peptidase dimerisation domain	Peptidase_M20
BjuVB02G12710	-1.24571	-	-	-	Q9C5E5|DGK5_ARATH Diacylglycerol kinase 5 OS=Arabidopsis thaliana OX=3702 GN=DGK5 PE=2 SV=1 PF00781:Diacylglycerol kinase catalytic domain|PF00609:Diacylglycerol kinase accessory domain	-
BjuVB02G58670	-1.41414	-	-	-	Q2V3H2|PUP7_ARATH Probable purine permease 7 OS=Arabidopsis thaliana OX=3702 GN=PUP7 PE=2 SV=1 PF16913:Purine nucleobase transmembrane transport	-
BjuVA03G60090	-1.42872	-	-	-1.17291	-	-
BjuVA04G15520	-1.33694	-	-	-	Q8RXN8|NRP_ARATH DCD domain-containing protein NRP OS=Arabidopsis thaliana OX=3702 GN=NRP PE=1 SV=1 PF10539:Development and cell death domain	-
BjuVA09G03250	-2.61763	-	-	-2.87065	Q9LHD2|GATLA_ARATH Probable galacturonosyltransferase-like 10 OS=Arabidopsis thaliana OX=3702 GN=GATL10 PE=2 SV=1 PF01501:Glycosyl transferase family 8	Glyco_transf_8
BjuVB06G32370	-2.11092	-	-	-	Q94AU2|SEC22_ARATH 25.3 kDa vesicle transport protein OS=Arabidopsis thaliana OX=3702 GN=SEC22 PE=2 SV=1 PF00957:Synaptobrevin|PF13774:Regulated-SNARE-like domain|PF13041:PPR repeat family|PF13812:Pentatricopeptide repeat domain	-
BjuVB03G42690	-1.3697	-	-	-	O04536|GATL9_ARATH Probable galacturonosyltransferase-like 9 OS=Arabidopsis thaliana OX=3702 GN=GATL9 PE=2 SV=1 PF01501:Glycosyl transferase family 8	Glyco_transf_8
BjuVA01G20850	1.31814	-	-1.70498	-	O23553|BAM3_ARATH Beta-amylase 3, chloroplastic OS=Arabidopsis thaliana OX=3702 GN=BAM3 PE=1 SV=3 PF01373:Glycosyl hydrolase family 14	-
BjuVA04G01070	-1.68046	-	-	-	Q9M373|AGP20_ARATH Arabinogalactan protein 20 OS=Arabidopsis thaliana OX=3702 GN=AGP20 PE=1 SV=1 -	-
BjuVA09G61540	1.79532	-	-	-	Q9ZT50|RHA2A_ARATH E3 ubiquitin-protein ligase RHA2A OS=Arabidopsis thaliana OX=3702 GN=RHA2A PE=1 SV=1 PF13639:Ring finger domain	-
BjuVA07G30860	-1.60884	-	-	-	Q96520|PER12_ARATH Peroxidase 12 OS=Arabidopsis thaliana OX=3702 GN=PER12 PE=1 SV=1 PF00141:Peroxidase	-
BjuVA06G36790	1.4245	1.4538	-	-	O04658|NOP5A_ARATH Probable nucleolar protein 5-1 OS=Arabidopsis thaliana OX=3702 GN=NOP5-1 PE=1 SV=2 PF08156:NOP5NT (NUC127) domain|PF01798:snoRNA binding domain, fibrillarin	-
BjuVA06G12740	-1.51802	-	-	-2.05789	Q1G3U8|VQ1_ARATH VQ motif-containing protein 1 OS=Arabidopsis thaliana OX=3702 GN=VQ1 PE=1 SV=1 PF05678:VQ motif	-
BjuVA05G32870	1.54308	1.61127	-	1.37064	Q9LRZ3|PUM24_ARATH Pumilio homolog 24 OS=Arabidopsis thaliana OX=3702 GN=APUM24 PE=1 SV=1 PF08144:CPL (NUC119) domain	-
BjuVB02G06330	-1.55196	-	-	-	PF06880:Protein of unknown function (DUF1262)|PF05431:Insecticidal Crystal Toxin, P42	-
BjuVB04G01480	1.53299	-	-	-	Q9LRP3|Y3174_ARATH Probable receptor-like protein kinase At3g17420 OS=Arabidopsis thaliana OX=3702 GN=At3g17420 PE=1 SV=1 PF00069:Protein kinase domain|PF00582:Universal stress protein family	Pkinase
BjuVA07G29470	-1.56676	-	-	-	Q9S7H8|ICS1_ARATH Isochorismate synthase 1, chloroplastic OS=Arabidopsis thaliana OX=3702 GN=ICS1 PE=1 SV=2 PF00425:chorismate binding enzyme	-
BjuVB02G70910	-1.86653	1.17317	1.15348	-	O80803|XTH17_ARATH Probable xyloglucan endotransglucosylase/hydrolase protein 17 OS=Arabidopsis thaliana OX=3702 GN=XTH17 PE=1 SV=1 PF06955:Xyloglucan endo-transglycosylase (XET) C-terminus|PF00722:Glycosyl hydrolases family 16	-
BjuVA05G17020	-1.33104	1.3767	1.55538	1.09658	PF08241:Methyltransferase domain	Methyltransf_11
BjuVA02G36560	1.68826	1.51912	2.77444	-	O80338|EF101_ARATH Ethylene-responsive transcription factor 2 OS=Arabidopsis thaliana OX=3702 GN=ERF2 PE=2 SV=1 PF00847:AP2 domain	AP2
BjuVB05G17270	-1.53207	1.083	2.23998	1.80995	F4IS56|ILK1_ARATH Integrin-linked protein kinase 1 OS=Arabidopsis thaliana OX=3702 GN=ILK1 PE=1 SV=1 PF12796:Ankyrin repeats (3 copies)|PF07714:Protein tyrosine and serine/threonine kinase	Pkinase_Tyr
BjuVB02G65760	1.33521	-	-	-	O04658|NOP5A_ARATH Probable nucleolar protein 5-1 OS=Arabidopsis thaliana OX=3702 GN=NOP5-1 PE=1 SV=2 PF08156:NOP5NT (NUC127) domain|PF01798:snoRNA binding domain, fibrillarin	-
BjuVB02G33660	1.76173	-	-	1.59867	Q8L616|DTX25_ARATH Protein DETOXIFICATION 25 OS=Arabidopsis thaliana OX=3702 GN=DTX25 PE=2 SV=1 PF01554:MatE	MatE
BjuVB02G43680	-1.44191	-	-	-	Q06850|CDPK1_ARATH Calcium-dependent protein kinase 1 OS=Arabidopsis thaliana OX=3702 GN=CPK1 PE=1 SV=1 PF00069:Protein kinase domain|PF13499:EF-hand domain pair	Pkinase
BjuVB07G41780	-2.75709	-	-	-	Q6IM91|DVL10_ARATH Small polypeptide DEVIL 10 OS=Arabidopsis thaliana OX=3702 GN=DVL10 PE=3 SV=1 PF08137:DVL family	-
BjuVB08G15090	-1.76549	-	-	-	O80871|P2C25_ARATH Probable protein phosphatase 2C 25 OS=Arabidopsis thaliana OX=3702 GN=At2g30020 PE=1 SV=1 PF00481:Protein phosphatase 2C	PP2C
BjuVB04G08990	-2.26973	-	1.94765	2.70722	Q9ZPS3|DCE4_ARATH Glutamate decarboxylase 4 OS=Arabidopsis thaliana OX=3702 GN=GAD4 PE=1 SV=1 PF00282:Pyridoxal-dependent decarboxylase conserved domain	-
BjuVB05G56940	1.90832	2.19811	2.85305	3.01176	Q9S7M2|TI10B_ARATH Protein TIFY 10B OS=Arabidopsis thaliana OX=3702 GN=TIFY10B PE=1 SV=1 PF06200:tify domain|PF09425:Jas motif	Zim
BjuVA03G34430	1.54959	1.52617	-	-	Q9M8Z5|NSN1_ARATH Guanine nucleotide-binding protein-like NSN1 OS=Arabidopsis thaliana OX=3702 GN=NSN1 PE=1 SV=1 PF01926:50S ribosome-binding GTPase|PF08701:GNL3L/Grn1 putative GTPase	-
BjuVA03G32750	1.49971	-	-	-	Q9SRV5|METE2_ARATH 5-methyltetrahydropteroyltriglutamate--homocysteine methyltransferase 2 OS=Arabidopsis thaliana OX=3702 GN=MS2 PE=1 SV=1 PF01717:Cobalamin-independent synthase, Catalytic domain|PF08267:Cobalamin-independent synthase, N-terminal domain	-
BjuVB06G03490	1.13898	-	-	-	O24603|CHI_ARATH Endochitinase CHI OS=Arabidopsis thaliana OX=3702 GN=CHI PE=2 SV=1 PF00182:Chitinase class I|PF00187:Chitin recognition protein	-
BjuVA03G19550	1.21314	-	-	-	P49636|RL40_NICSY Ubiquitin-60S ribosomal protein L40 OS=Nicotiana sylvestris OX=4096 GN=UBICEP52-7 PE=2 SV=2 PF00240:Ubiquitin family|PF01020:Ribosomal L40e family	ubiquitin
BjuVA03G21200	2.18909	2.99998	3.41584	3.28408	Q9ZVJ6|ANXD4_ARATH Annexin D4 OS=Arabidopsis thaliana OX=3702 GN=ANN4 PE=1 SV=1 PF00191:Annexin	-
BjuVA04G00630	-2.286	-	-	-	Q9LZJ3|XXT1_ARATH Xyloglucan 6-xylosyltransferase 1 OS=Arabidopsis thaliana OX=3702 GN=XXT1 PE=1 SV=1 PF05637:galactosyl transferase GMA12/MNN10 family	-
BjuVB05G21160	-1.49674	-	-	-	Q9SVN2|RLP47_ARATH Receptor-like protein 47 OS=Arabidopsis thaliana OX=3702 GN=RLP47 PE=3 SV=2 PF08263:Leucine rich repeat N-terminal domain	LRRNT_2
BjuVB05G13750	-1.02224	-	-	-	Q8GYA4|CRK10_ARATH Cysteine-rich receptor-like protein kinase 10 OS=Arabidopsis thaliana OX=3702 GN=CRK10 PE=1 SV=3 PF01657:Salt stress response/antifungal|PF07714:Protein tyrosine and serine/threonine kinase	Pkinase_Tyr
BjuVA08G16060	-1.16041	-	-	-	Q42798|C93A1_SOYBN 3,9-dihydroxypterocarpan 6A-monooxygenase OS=Glycine max OX=3847 GN=CYP93A1 PE=1 SV=1 PF00067:Cytochrome P450	p450
BjuVA03G38500	-1.46599	-	-	-1.14567	O80340|ERF78_ARATH Ethylene-responsive transcription factor 4 OS=Arabidopsis thaliana OX=3702 GN=ERF4 PE=1 SV=1 PF00847:AP2 domain	AP2
BjuVB07G03690	-1.33647	-	-	-	Q9SF86|PCRK1_ARATH Serine/threonine-protein kinase PCRK1 OS=Arabidopsis thaliana OX=3702 GN=PCRK1 PE=1 SV=1 PF00069:Protein kinase domain	Pkinase
BjuVB06G49670	-1.34783	-	-	-	Q9SJM6|SAP4_ARATH Zinc finger A20 and AN1 domain-containing stress-associated protein 4 OS=Arabidopsis thaliana OX=3702 GN=SAP4 PE=1 SV=1 PF01754:A20-like zinc finger|PF01428:AN1-like Zinc finger	zf-AN1
BjuVB06G50660	-1.42769	-	-	-	O22799|Y2349_ARATH Uncharacterized protein At2g33490 OS=Arabidopsis thaliana OX=3702 GN=At2g33490 PE=4 SV=2 -	-
BjuVA03G45680	-1.29973	-	-	-1.71646	I1LPE9|NAC6_SOYBN NAC domain-containing protein 6 OS=Glycine max OX=3847 GN=NAC6 PE=2 SV=1 PF02365:No apical meristem (NAM) protein	NAM
BjuVB08G28330	-1.08889	-	-	-	Q9SYS7|CRK39_ARATH Putative cysteine-rich receptor-like protein kinase 39 OS=Arabidopsis thaliana OX=3702 GN=CRK39 PE=3 SV=1 PF00069:Protein kinase domain|PF01657:Salt stress response/antifungal	Pkinase
BjuVA08G25450	-1.32258	-	-	-	Q9C7N2|CAD1_ARATH MACPF domain-containing protein CAD1 OS=Arabidopsis thaliana OX=3702 GN=CAD1 PE=2 SV=1 PF01823:MAC/Perforin domain	-
BjuVA10G27000	-1.1465	-	-	-	-	-
BjuVA07G42350	2.09586	2.48545	3.24788	3.24478	Q9SRD4|IGMT5_ARATH Indole glucosinolate O-methyltransferase 5 OS=Arabidopsis thaliana OX=3702 GN=IGMT5 PE=2 SV=1 PF08100:Dimerisation domain|PF00891:O-methyltransferase domain	-
BjuVA10G05470	1.99297	-	-	3.53332	PF07063:Domain of unknown function (DUF1338)	-
BjuVB01G29930	-2.30001	-	-	2.43353	Q9LIR8|FBK67_ARATH F-box/kelch-repeat protein At3g23880 OS=Arabidopsis thaliana OX=3702 GN=At3g23880 PE=2 SV=1 PF00646:F-box domain|PF07734:F-box associated|PF05653:Magnesium transporter NIPA	DUF803
BjuVB02G34680	-1.14192	-	-3.2672	-1.1284	Q9FMD9|GLN14_ARATH Glutamine synthetase cytosolic isozyme 1-4 OS=Arabidopsis thaliana OX=3702 GN=GLN1-4 PE=1 SV=1 PF00120:Glutamine synthetase, catalytic domain|PF03951:Glutamine synthetase, beta-Grasp domain	-
BjuVB06G48660	1.57911	-	-	-	Q9SV31|PIP25_ARATH Probable aquaporin PIP2-5 OS=Arabidopsis thaliana OX=3702 GN=PIP2-5 PE=1 SV=1 PF00230:Major intrinsic protein	-
BjuVA06G13220	-2.44952	-	-	-2.34401	Q9FZ59|PEPR2_ARATH Leucine-rich repeat receptor-like protein kinase PEPR2 OS=Arabidopsis thaliana OX=3702 GN=PEPR2 PE=1 SV=1 PF00069:Protein kinase domain|PF13855:Leucine rich repeat	Pkinase
BjuVB02G07020	-1.29009	-	-	-	O49839|PBL2_ARATH Probable serine/threonine-protein kinase PBL2 OS=Arabidopsis thaliana OX=3702 GN=PBL2 PE=1 SV=1 PF07714:Protein tyrosine and serine/threonine kinase	Pkinase_Tyr
BjuVA06G30010	-1.33901	1.04107	-	-	-	-
BjuVB02G75890	1.23998	-1.48478	-1.16448	-	PF13499:EF-hand domain pair	-
BjuVB02G61680	-2.60155	-	1.8239	-	Q9SN12|MYB77_ARATH Transcription factor MYB77 OS=Arabidopsis thaliana OX=3702 GN=MYB77 PE=1 SV=1 PF00249:Myb-like DNA-binding domain	Myb_DNA-binding
BjuVB07G03140	1.3011	1.31894	-	1.39158	Q9C9Z2|RER3_ARATH Protein RETICULATA-RELATED 3, chloroplastic OS=Arabidopsis thaliana OX=3702 GN=RER3 PE=1 SV=1 PF11891:Protein RETICULATA-related	-
BjuVB06G56860	1.43041	-	-	-	Q9M353|CHX20_ARATH Cation/H(+) antiporter 20 OS=Arabidopsis thaliana OX=3702 GN=CHX20 PE=2 SV=1 PF00999:Sodium/hydrogen exchanger family	Na_H_Exchanger
BjuVB08G56300	-1.66358	-	-	-2.90564	-	-
BjuVA09G66400	-1.54748	-	-	-1.70101	-	-
BjuVA07G36550	-1.60673	-	-	-	PF04601:Domain of unknown function (DUF569)	-
BjuVB06G04200	-1.29034	-	-	-	O64883|BGL26_ARATH Beta-glucosidase 26, peroxisomal OS=Arabidopsis thaliana OX=3702 GN=BGLU26 PE=1 SV=1 PF00232:Glycosyl hydrolase family 1	Glyco_hydro_1
BjuVA08G13230	-1.53555	-	-1.10824	-	Q9M0M5|SCL13_ARATH Scarecrow-like protein 13 OS=Arabidopsis thaliana OX=3702 GN=SCL13 PE=2 SV=2 PF03514:GRAS domain family	GRAS
BjuVB06G08380	1.05771	-	-1.59215	-1.66777	P43287|PIP22_ARATH Aquaporin PIP2-2 OS=Arabidopsis thaliana OX=3702 GN=PIP2-2 PE=1 SV=2 PF00230:Major intrinsic protein	-
BjuVB04G33480	-2.90202	-	-	-2.8922	Q9SFE4|ERF12_ARATH Ethylene-responsive transcription factor ERF012 OS=Arabidopsis thaliana OX=3702 GN=ERF012 PE=2 SV=1 PF00847:AP2 domain	AP2
BjuVA09G19050	-1.76001	1.4363	-	1.80692	-	-
BjuVB07G23930	-2.04488	-	-	-1.56542	Q9SGI8|CML40_ARATH Probable calcium-binding protein CML40 OS=Arabidopsis thaliana OX=3702 GN=CML40 PE=2 SV=1 PF13833:EF-hand domain pair	-
BjuVA10G27550	-1.53806	-	-	-	Q9LX93|ATL55_ARATH E3 ubiquitin-protein ligase RING1 OS=Arabidopsis thaliana OX=3702 GN=ATL55 PE=1 SV=1 PF13639:Ring finger domain	-
BjuVB07G20040	-1.21263	-	-	-1.09901	Q9LKG8|NAC91_ARATH NAC domain-containing protein 91 OS=Arabidopsis thaliana OX=3702 GN=NAC091 PE=1 SV=1 PF02365:No apical meristem (NAM) protein	NAM
BjuVB03G16060	-1.19433	-	-	-	Q9C7R6|PUB17_ARATH U-box domain-containing protein 17 OS=Arabidopsis thaliana OX=3702 GN=PUB17 PE=2 SV=1 PF04564:U-box domain|PF00514:Armadillo/beta-catenin-like repeat	U-box
BjuVA03G05060	7.76227	-	-	-	P29830|HS176_ARATH 17.6 kDa class II heat shock protein OS=Arabidopsis thaliana OX=3702 GN=HSP17.6 PE=2 SV=1 PF00011:Hsp20/alpha crystallin family	-
BjuVA09G04770	1.10291	-1.00116	-1.01084	-2.26942	F4K5T2|CGL_ARATH Bifunctional cystathionine gamma-lyase/cysteine synthase OS=Arabidopsis thaliana OX=3702 GN=DES1 PE=1 SV=1 PF00291:Pyridoxal-phosphate dependent enzyme	PALP
BjuVA07G36890	-1.22721	-	-	-	C0LGH3|Y5614_ARATH Probable LRR receptor-like serine/threonine-protein kinase At1g56140 OS=Arabidopsis thaliana OX=3702 GN=At1g56140 PE=2 SV=2 PF11721:Malectin domain	-
BjuVA03G58190	-3.72828	-	-	-3.14908	PF13359:DDE superfamily endonuclease	-
BjuVA03G47750	-1.65402	-	1.10303	-	Q9SCZ4|FERON_ARATH Receptor-like protein kinase FERONIA OS=Arabidopsis thaliana OX=3702 GN=FER PE=1 SV=1 PF07714:Protein tyrosine and serine/threonine kinase|PF12819:Malectin-like domain	Pkinase_Tyr
BjuVB08G54020	1.35388	1.9923	1.98063	2.68371	Q9M2V5|AB18G_ARATH ABC transporter G family member 18 OS=Arabidopsis thaliana OX=3702 GN=ABCG18 PE=2 SV=1 PF00005:ABC transporter|PF01061:ABC-2 type transporter	ABC2_membrane
BjuVB05G07970	1.99249	-	-	-	-	-
BjuVB02G57360	-1.97558	-	-	-	Q8S9L6|CRK29_ARATH Cysteine-rich receptor-like protein kinase 29 OS=Arabidopsis thaliana OX=3702 GN=CRK29 PE=2 SV=1 PF00069:Protein kinase domain|PF01657:Salt stress response/antifungal	Pkinase
BjuVB06G01630	-1.40941	-	-	-	Q8RXD9|DPE2_ARATH 4-alpha-glucanotransferase DPE2 OS=Arabidopsis thaliana OX=3702 GN=DPE2 PE=1 SV=1 PF00686:Starch binding domain|PF02446:4-alpha-glucanotransferase	-
BjuVA09G11820	-1.34776	-	-	-	Q9ZPW3|HBI1_ARATH Transcription factor HBI1 OS=Arabidopsis thaliana OX=3702 GN=HBI1 PE=1 SV=3 PF00010:Helix-loop-helix DNA-binding domain	HLH
BjuVA03G37450	1.17219	-	-	1.4517	F4JC97|PSME4_ARATH Proteasome activator subunit 4 OS=Arabidopsis thaliana OX=3702 GN=PA200 PE=2 SV=2 PF16507:Proteasome-substrate-size regulator, mid region|PF11919:Domain of unknown function (DUF3437)	-
BjuVA05G07090	3.11893	-	-	3.02758	Q96303|PHT14_ARATH Inorganic phosphate transporter 1-4 OS=Arabidopsis thaliana OX=3702 GN=PHT1-4 PE=1 SV=1 PF00083:Sugar (and other) transporter	Sugar_tr
BjuVA10G33860	-1.54186	-	-	-	P43293|PBL11_ARATH Probable serine/threonine-protein kinase PBL11 OS=Arabidopsis thaliana OX=3702 GN=PBL11 PE=1 SV=2 PF07714:Protein tyrosine and serine/threonine kinase	Pkinase_Tyr
BjuVB04G29580	-1.47156	-	-	-	PF03168:Late embryogenesis abundant protein	-
BjuVA01G17510	1.20876	-	-	-	Q9FEF8|FBRL1_ARATH rRNA 2'-O-methyltransferase fibrillarin 1 OS=Arabidopsis thaliana OX=3702 GN=FIB1 PE=1 SV=1 PF01269:Fibrillarin	-
BjuVA03G49490	1.33303	-	-	-	O23515|RL151_ARATH 60S ribosomal protein L15-1 OS=Arabidopsis thaliana OX=3702 GN=RPL15A PE=2 SV=1 PF00827:Ribosomal L15	-
BjuVA07G40120	-1.82755	-	-	-	Q9C6A8|RLP15_ARATH Receptor-like protein 15 OS=Arabidopsis thaliana OX=3702 GN=RLP15 PE=3 SV=1 PF13855:Leucine rich repeat|PF08263:Leucine rich repeat N-terminal domain	LRRNT_2
BjuVB08G46870	1.12179	-	-	-	Q9C5L3|GLPT1_ARATH Putative glycerol-3-phosphate transporter 1 OS=Arabidopsis thaliana OX=3702 GN=At3g47420 PE=2 SV=1 PF07690:Major Facilitator Superfamily	MFS_1
BjuVB08G01210	1.27581	1.30665	-	2.54077	P32068|TRPE_ARATH Anthranilate synthase alpha subunit 1, chloroplastic OS=Arabidopsis thaliana OX=3702 GN=ASA1 PE=1 SV=1 PF00425:chorismate binding enzyme|PF04715:Anthranilate synthase component I, N terminal region	-
BjuVA05G05010	2.25938	1.79391	1.42943	-	Q8L7F7|NUP62_ARATH Nuclear pore complex protein NUP62 OS=Arabidopsis thaliana OX=3702 GN=NUP62 PE=1 SV=1 PF13634:Nucleoporin FG repeat region|PF05064:Nsp1-like C-terminal region	-
BjuVB08G38690	-1.1297	-	-	-	Q94AP0|ALN_ARATH Allantoinase OS=Arabidopsis thaliana OX=3702 GN=ALN PE=1 SV=1 PF01979:Amidohydrolase family	Amidohydro_1
BjuVB08G19710	-1.2545	-	-	-1.83853	PF03107:C1 domain	-
BjuVB04G31430	-1.15923	-	-	-	Q93VH2|BBD2_ARATH Bifunctional nuclease 2 OS=Arabidopsis thaliana OX=3702 GN=BBD2 PE=2 SV=1 PF02577:Domain of unknown function (DUF151)	-
BjuVA05G27250	1.27127	-1.68543	-	-2.42512	Q9LVE0|PTR33_ARATH Protein NRT1/ PTR FAMILY 6.4 OS=Arabidopsis thaliana OX=3702 GN=NPF6.4 PE=1 SV=1 PF00854:POT family	-
BjuVB02G64740	-1.65684	-	-2.85365	-3.20197	Q7FZR1|RLP52_ARATH Receptor-like protein 52 OS=Arabidopsis thaliana OX=3702 GN=RLP52 PE=2 SV=1 PF08263:Leucine rich repeat N-terminal domain|PF13855:Leucine rich repeat	LRRNT_2
BjuVB01G07830	2.05085	4.4866	4.49356	5.05229	Q9SND9|Y3028_ARATH Uncharacterized acetyltransferase At3g50280 OS=Arabidopsis thaliana OX=3702 GN=At3g50280 PE=3 SV=1 PF02458:Transferase family	-
BjuVA04G23330	2.40219	-	3.0133	5.23568	P92994|TCMO_ARATH Trans-cinnamate 4-monooxygenase OS=Arabidopsis thaliana OX=3702 GN=CYP73A5 PE=1 SV=1 PF00067:Cytochrome P450	p450
BjuVB07G33860	-1.91012	-	2.67902	-	PF13369:Transglutaminase-like superfamily	-
BjuVA09G15420	1.69701	-	-1.24309	-	O66601|GUAA_AQUAE GMP synthase [glutamine-hydrolyzing] OS=Aquifex aeolicus (strain VF5) OX=224324 GN=guaA PE=3 SV=1 PF00117:Glutamine amidotransferase class-I|PF00958:GMP synthase C terminal domain	GATase
BjuVB04G01150	-1.69038	-	-1.4332	-	-	-
BjuVB02G39430	-1.7061	-	-	-	Q8H0W9|CAP17_ARATH Putative clathrin assembly protein At5g10410 OS=Arabidopsis thaliana OX=3702 GN=At5g10410 PE=2 SV=2 PF07651:ANTH domain	-
BjuVB06G50180	-1.35704	-	-	-	Q8RXN8|NRP_ARATH DCD domain-containing protein NRP OS=Arabidopsis thaliana OX=3702 GN=NRP PE=1 SV=1 PF10539:Development and cell death domain	-
BjuVA10G05440	-1.28159	-	-	-	Q9LMJ4|E70B2_ARATH Exocyst complex component EXO70B2 OS=Arabidopsis thaliana OX=3702 GN=EXO70B2 PE=1 SV=1 PF03081:Exo70 exocyst complex subunit	Exo70
BjuVA03G09680	1.45012	-	-	-2.10453	Q8LBH4|SPX1_ARATH SPX domain-containing protein 1 OS=Arabidopsis thaliana OX=3702 GN=SPX1 PE=1 SV=2 PF03105:SPX domain	SPX
BjuVA05G35580	-1.47687	-	1.90489	-	Q9LVJ3|RSH2C_ARATH Probable GTP diphosphokinase RSH2, chloroplastic OS=Arabidopsis thaliana OX=3702 GN=RSH2 PE=2 SV=1 PF04607:Region found in RelA / SpoT proteins|PF13328:HD domain	-
BjuVB01G29480	1.45942	-	-	-	Q4KMC4|GFPT2_RAT Glutamine--fructose-6-phosphate aminotransferase [isomerizing] 2 OS=Rattus norvegicus OX=10116 GN=Gfpt2 PE=1 SV=3 PF13522:Glutamine amidotransferase domain|PF01380:SIS domain	SIS
BjuVB02G68870	-1.77155	-	-	-	Q9SZ13|VA0E2_ARATH V-type proton ATPase subunit e2 OS=Arabidopsis thaliana OX=3702 GN=VHA-e2 PE=3 SV=1 -	-
BjuVA03G50200	-1.71276	-	-	-	O49696|ALMTC_ARATH Aluminum-activated malate transporter 12 OS=Arabidopsis thaliana OX=3702 GN=ALMT12 PE=2 SV=1 PF11744:Aluminium activated malate transporter	-
BjuVA05G04190	1.20948	-	-1.24097	-	O80585|MTHR2_ARATH Methylenetetrahydrofolate reductase 2 OS=Arabidopsis thaliana OX=3702 GN=MTHFR2 PE=1 SV=2 PF02219:Methylenetetrahydrofolate reductase	-
BjuVA05G09990	-2.53772	-	-	-	Q93ZT5|EDL3_ARATH EID1-like F-box protein 3 OS=Arabidopsis thaliana OX=3702 GN=EDL3 PE=2 SV=1 -	-
BjuVB01G06780	1.31599	-	-	-	P50883|RL121_ARATH 60S ribosomal protein L12-1 OS=Arabidopsis thaliana OX=3702 GN=RPL12A PE=2 SV=2 PF03946:Ribosomal protein L11, N-terminal domain|PF00298:Ribosomal protein L11, RNA binding domain	-
BjuVA09G46750	-2.29851	-	-	-	F4J3G5|CTPA3_ARATH Carboxyl-terminal-processing peptidase 3, chloroplastic OS=Arabidopsis thaliana OX=3702 GN=CTPA3 PE=3 SV=1 PF17820:PDZ domain|PF03572:Peptidase family S41	Peptidase_S41
BjuVA03G32700	-1.00704	-	-	-	-	-
BjuVB02G41640	-1.26987	-	-	-	Q8RX63|RLP31_ARATH Receptor-like protein 31 OS=Arabidopsis thaliana OX=3702 GN=RLP31 PE=2 SV=1 PF08263:Leucine rich repeat N-terminal domain	LRRNT_2
BjuVB05G36790	1.53641	-	-	-	Q39152|FACR1_ARATH Fatty acyl-CoA reductase 1 OS=Arabidopsis thaliana OX=3702 GN=FAR1 PE=1 SV=1 PF03015:Male sterility protein|PF07993:Male sterility protein	NAD_binding_4
BjuVB04G20180	1.17045	-	-	-	Q5XEP2|HSOP2_ARATH Hsp70-Hsp90 organizing protein 2 OS=Arabidopsis thaliana OX=3702 GN=HOP2 PE=1 SV=1 PF00515:Tetratricopeptide repeat|PF13414:TPR repeat|PF17830:STI1 domain	TPR_1
BjuVB04G39060	-4.64601	-	-	-2.40508	Q9LMM6|BPS1_ARATH Protein BPS1, chloroplastic OS=Arabidopsis thaliana OX=3702 GN=BPS1 PE=2 SV=1 -	-
BjuVB04G29570	-1.86485	-	-	-3.15652	A0A290U7C4|ROQ1_NICBE Disease resistance protein Roq1 OS=Nicotiana benthamiana OX=4100 GN=ROQ1 PE=1 SV=1 PF01582:TIR domain	TIR
BjuVB08G00120	2.48852	2.47098	2.44952	-	Q9FYE6|BH101_ARATH Transcription factor bHLH101 OS=Arabidopsis thaliana OX=3702 GN=BHLH101 PE=1 SV=1 PF00010:Helix-loop-helix DNA-binding domain|PF00986:DNA gyrase B subunit, carboxyl terminus	DNA_gyraseB_C
BjuVB02G12100	-2.14287	-	-1.34988	-2.05683	Q42525|HXK1_ARATH Hexokinase-1 OS=Arabidopsis thaliana OX=3702 GN=HXK1 PE=1 SV=2 PF00349:Hexokinase|PF03727:Hexokinase	-
BjuVB08G55630	-1.77904	-	-	-	O80683|CAB25_ARATH Calmodulin-binding protein 25 OS=Arabidopsis thaliana OX=3702 GN=CAMBP25 PE=1 SV=1 PF05678:VQ motif	-
BjuVB03G44140	-1.42376	-	-	1.61594	Q9M9H6|CK1_ARATH Probable choline kinase 1 OS=Arabidopsis thaliana OX=3702 GN=CK1 PE=2 SV=1 PF01633:Choline/ethanolamine kinase	Choline_kinase
BjuVA04G17450	-1.34397	-	1.40897	-	Q9SJY5|PUMP5_ARATH Mitochondrial uncoupling protein 5 OS=Arabidopsis thaliana OX=3702 GN=PUMP5 PE=2 SV=1 PF00153:Mitochondrial carrier protein	Mito_carr
BjuVA03G11400	-1.3653	-	-	-2.6802	Q8VY27|E70H1_ARATH Exocyst complex component EXO70H1 OS=Arabidopsis thaliana OX=3702 GN=EXO70H1 PE=1 SV=1 PF03081:Exo70 exocyst complex subunit	Exo70
BjuVB01G36820	-1.63115	-	-	-	Q9SUC9|UGPI7_ARATH Uncharacterized GPI-anchored protein At4g28100 OS=Arabidopsis thaliana OX=3702 GN=At4g28100 PE=2 SV=1 PF19160:SPARK	-
BjuVB06G25920	-1.50746	-	1.51721	-	C0LGG9|Y5344_ARATH Probable LRR receptor-like serine/threonine-protein kinase At1g53440 OS=Arabidopsis thaliana OX=3702 GN=At1g53440 PE=2 SV=2 PF11721:Malectin domain|PF07714:Protein tyrosine and serine/threonine kinase	Pkinase_Tyr
BjuVB02G39640	-1.69531	-	-	-	F4KFG5|TPPI_ARATH Probable trehalose-phosphate phosphatase I OS=Arabidopsis thaliana OX=3702 GN=TPPI PE=3 SV=1 PF02358:Trehalose-phosphatase	-
BjuVA09G42880	-1.52468	-	-	-	Q39234|TGA3_ARATH Transcription factor TGA3 OS=Arabidopsis thaliana OX=3702 GN=TGA3 PE=1 SV=1 PF14144:Seed dormancy control	-
BjuVA04G15640	-1.5153	-	-	-	P25070|CML24_ARATH Calcium-binding protein CML24 OS=Arabidopsis thaliana OX=3702 GN=CML24 PE=2 SV=2 PF13499:EF-hand domain pair	-
BjuVB04G36860	1.01703	-	-	-	Q8RWD0|COL16_ARATH Zinc finger protein CONSTANS-LIKE 16 OS=Arabidopsis thaliana OX=3702 GN=COL16 PE=1 SV=2 PF00643:B-box zinc finger|PF06203:CCT motif	CCT
BjuVA06G05480	1.54847	-	-	-	Q9XFR5|SR30_ARATH Serine/arginine-rich splicing factor SR30 OS=Arabidopsis thaliana OX=3702 GN=SR30 PE=1 SV=1 PF00076:RNA recognition motif. (a.k.a. RRM, RBD, or RNP domain)	RRM_1
BjuVA09G48330	-1.95171	-	-	-	Q9SVN2|RLP47_ARATH Receptor-like protein 47 OS=Arabidopsis thaliana OX=3702 GN=RLP47 PE=3 SV=2 PF08263:Leucine rich repeat N-terminal domain|PF13855:Leucine rich repeat	LRRNT_2
BjuVB01G08060	-1.51215	-	-	-	Q8VZP6|GUX8_ARATH Putative glucuronosyltransferase PGSIP8 OS=Arabidopsis thaliana OX=3702 GN=PGSIP8 PE=2 SV=1 -	-
BjuVB07G45740	-1.49108	-	-1.59158	-2.95578	O48716|JGB_ARATH Protein JINGUBANG OS=Arabidopsis thaliana OX=3702 GN=JGB PE=1 SV=1 -	-
BjuVB03G18980	1.14788	-	-1.35217	-	Q9LMF0|U85A5_ARATH UDP-glycosyltransferase 85A5 OS=Arabidopsis thaliana OX=3702 GN=UGT85A5 PE=2 SV=1 PF00201:UDP-glucoronosyl and UDP-glucosyl transferase	UDPGT
BjuVB05G21360	-1.40378	-	-	-	Q9SCZ4|FERON_ARATH Receptor-like protein kinase FERONIA OS=Arabidopsis thaliana OX=3702 GN=FER PE=1 SV=1 PF12819:Malectin-like domain|PF07714:Protein tyrosine and serine/threonine kinase	Pkinase_Tyr
BjuVA01G21230	1.32365	-	-	-	O23515|RL151_ARATH 60S ribosomal protein L15-1 OS=Arabidopsis thaliana OX=3702 GN=RPL15A PE=2 SV=1 PF00827:Ribosomal L15	-
BjuVA06G12610	-1.20395	-	1.09651	1.86446	Q9SYM5|RHM1_ARATH Trifunctional UDP-glucose 4,6-dehydratase/UDP-4-keto-6-deoxy-D-glucose 3,5-epimerase/UDP-4-keto-L-rhamnose-reductase RHM1 OS=Arabidopsis thaliana OX=3702 GN=RHM1 PE=1 SV=1 PF16363:GDP-mannose 4,6 dehydratase|PF04321:RmlD substrate binding domain	-
BjuVA02G41610	-1.15079	-	-	-	Q9LSI9|BIR2_ARATH Inactive LRR receptor-like serine/threonine-protein kinase BIR2 OS=Arabidopsis thaliana OX=3702 GN=BIR2 PE=1 SV=1 PF08263:Leucine rich repeat N-terminal domain|PF07714:Protein tyrosine and serine/threonine kinase	Pkinase_Tyr
BjuVB02G02590	-1.18293	-	-	-	Q05431|APX1_ARATH L-ascorbate peroxidase 1, cytosolic OS=Arabidopsis thaliana OX=3702 GN=APX1 PE=1 SV=2 PF00141:Peroxidase	-
BjuVB03G35690	1.12641	-	-	-	Q9ZSR8|RSSA_BRANA 40S ribosomal protein SA OS=Brassica napus OX=3708 GN=LRP PE=2 SV=1 PF00318:Ribosomal protein S2	-
BjuVB05G07100	-1.90956	-	-	-	Q9SUI0|RC24_ARATH UPF0057 membrane protein At4g30660 OS=Arabidopsis thaliana OX=3702 GN=At4g30660 PE=3 SV=1 -	-
BjuVB02G41770	4.57431	-	-	-	Q8L5A7|SOT15_ARATH Cytosolic sulfotransferase 15 OS=Arabidopsis thaliana OX=3702 GN=SOT15 PE=1 SV=1 PF00685:Sulfotransferase domain	Sulfotransfer_1
BjuVB03G20610	-1.06203	-	-	-	Q42798|C93A1_SOYBN 3,9-dihydroxypterocarpan 6A-monooxygenase OS=Glycine max OX=3847 GN=CYP93A1 PE=1 SV=1 PF00067:Cytochrome P450	p450
BjuVB06G54750	2.10271	-	-3.07394	-	PF05553:Cotton fibre expressed protein	-
BjuVA09G38930	1.27149	-	-	-	PF06624:Ribosome associated membrane protein RAMP4	-
BjuVA02G21690	-2.53237	-	-	-	Q9CAL3|CRK2_ARATH Cysteine-rich receptor-like protein kinase 2 OS=Arabidopsis thaliana OX=3702 GN=CRK2 PE=1 SV=1 PF01657:Salt stress response/antifungal|PF00069:Protein kinase domain	Pkinase
BjuVA06G38740	1.50311	-	-	-2.0773	Q940V4|C85A2_ARATH Cytochrome P450 85A2 OS=Arabidopsis thaliana OX=3702 GN=CYP85A2 PE=2 SV=1 PF00067:Cytochrome P450	p450
BjuVB08G50780	1.55565	-	-	-	Q9XFS7|NLTP5_ARATH Non-specific lipid-transfer protein 5 OS=Arabidopsis thaliana OX=3702 GN=LTP5 PE=1 SV=1 PF00234:Protease inhibitor/seed storage/LTP family	-
BjuVA08G38240	-1.5913	-	1.10256	-	F4HXL0|PLIP2_ARATH Phospholipase A1 PLIP2, chloroplastic OS=Arabidopsis thaliana OX=3702 GN=PLIP2 PE=1 SV=1 PF01764:Lipase (class 3)	Lipase_3
BjuVA10G24740	1.64679	1.39661	-	1.55216	Q9FMU5|UTP18_ARATH U3 small nucleolar RNA-associated protein 18 homolog OS=Arabidopsis thaliana OX=3702 GN=At5g14050 PE=1 SV=1 -	-
BjuVB04G01290	-1.28402	1.15594	1.96347	1.97856	Q9FE06|EXOL2_ARATH Protein EXORDIUM-like 2 OS=Arabidopsis thaliana OX=3702 GN=EXL2 PE=2 SV=1 PF04674:Phosphate-induced protein 1 conserved region	-
BjuVA06G30560	-1.04929	-	-	-	Q9FGF6|GLV2_ARATH Protein GOLVEN 2 OS=Arabidopsis thaliana OX=3702 GN=GLV2 PE=1 SV=1 -	-
BjuVA08G32490	1.35323	-	-	1.31644	Q93VT9|RL101_ARATH 60S ribosomal protein L10-1 OS=Arabidopsis thaliana OX=3702 GN=RPL10A PE=1 SV=1 PF00252:Ribosomal protein L16p/L10e	-
BjuVA03G10280	-1.57599	-	-	-1.97295	-	-
BjuVB03G40890	-3.17314	-	1.13732	-	-	-
BjuVA05G12270	-1.56575	-	-	-	-	-
BjuVA04G05570	1.11691	-	-	-	Q42586|UMPS_ARATH Uridine 5'-monophosphate synthase OS=Arabidopsis thaliana OX=3702 GN=PYRE-F PE=2 SV=2 PF00215:Orotidine 5'-phosphate decarboxylase / HUMPS family|PF00156:Phosphoribosyl transferase domain	Pribosyltran
BjuVB02G42080	-1.18345	-	-	-	Q9FG35|TBR_ARATH Protein trichome birefringence OS=Arabidopsis thaliana OX=3702 GN=TBR PE=1 SV=1 PF14416:PMR5 N terminal Domain|PF13839:GDSL/SGNH-like Acyl-Esterase family found in Pmr5 and Cas1p	-
BjuVA04G05270	-1.36623	-	-	-	Q9SV30|GATA8_ARATH GATA transcription factor 8 OS=Arabidopsis thaliana OX=3702 GN=GATA8 PE=1 SV=1 PF00320:GATA zinc finger	GATA
BjuVB03G19210	1.17218	1.12937	-	1.37053	Q9XI01|PDI11_ARATH Protein disulfide isomerase-like 1-1 OS=Arabidopsis thaliana OX=3702 GN=PDIL1-1 PE=1 SV=1 PF13848:Thioredoxin-like domain|PF00085:Thioredoxin	-
BjuVA03G22840	-1.24969	-	-	-	-	-
BjuV_Contig00715G00290	-1.37175	-	-	-	Q9M8T0|Y3288_ARATH Probable inactive receptor kinase At3g02880 OS=Arabidopsis thaliana OX=3702 GN=At3g02880 PE=1 SV=1 PF13855:Leucine rich repeat|PF08263:Leucine rich repeat N-terminal domain|PF00069:Protein kinase domain	Pkinase
BjuVB07G23110	-1.81442	-	-	-	Q9LH89|Y3885_ARATH Uncharacterized protein At3g28850 OS=Arabidopsis thaliana OX=3702 GN=At3g28850 PE=4 SV=1 PF00462:Glutaredoxin	-
BjuVB03G16500	-1.15371	-	-	-	Q9SGN6|NSL1_ARATH MACPF domain-containing protein NSL1 OS=Arabidopsis thaliana OX=3702 GN=NSL1 PE=2 SV=1 PF01823:MAC/Perforin domain	-
BjuVA08G35000	1.20352	-	-	-	Q43291|RL211_ARATH 60S ribosomal protein L21-1 OS=Arabidopsis thaliana OX=3702 GN=RPL21A PE=2 SV=2 PF01157:Ribosomal protein L21e	-
BjuVA05G17760	-1.42482	-	1.00309	-	C0LGG9|Y5344_ARATH Probable LRR receptor-like serine/threonine-protein kinase At1g53440 OS=Arabidopsis thaliana OX=3702 GN=At1g53440 PE=2 SV=2 PF07714:Protein tyrosine and serine/threonine kinase|PF11721:Malectin domain	Pkinase_Tyr
BjuVB04G26140	-1.37769	-	-	-	Q9SXB8|Y1133_ARATH G-type lectin S-receptor-like serine/threonine-protein kinase At1g11330 OS=Arabidopsis thaliana OX=3702 GN=At1g11330 PE=1 SV=3 PF01453:D-mannose binding lectin|PF00954:S-locus glycoprotein domain|PF08276:PAN-like domain|PF07714:Protein tyrosine and serine/threonine kinase	Pkinase_Tyr
BjuVB02G48770	-3.06759	-	-	-2.16219	Q9FH76|ABAH3_ARATH Abscisic acid 8'-hydroxylase 3 OS=Arabidopsis thaliana OX=3702 GN=CYP707A3 PE=1 SV=1 PF00067:Cytochrome P450	p450
BjuVA09G19200	1.53766	-	-1.29409	-	O04267|SAR1B_BRACM GTP-binding protein SAR1B OS=Brassica campestris OX=3711 GN=SAR1B PE=2 SV=1 PF00025:ADP-ribosylation factor family	Arf
BjuVA02G42610	-1.14881	-	-1.02454	-	P92983|PROD1_ARATH Proline dehydrogenase 1, mitochondrial OS=Arabidopsis thaliana OX=3702 GN=POX1 PE=1 SV=2 PF01619:Proline dehydrogenase	-
BjuVA06G39610	-3.03063	-	-	-	Q9LHD2|GATLA_ARATH Probable galacturonosyltransferase-like 10 OS=Arabidopsis thaliana OX=3702 GN=GATL10 PE=2 SV=1 PF01501:Glycosyl transferase family 8	Glyco_transf_8
BjuVB03G03220	1.11451	-	-	-	Q43291|RL211_ARATH 60S ribosomal protein L21-1 OS=Arabidopsis thaliana OX=3702 GN=RPL21A PE=2 SV=2 PF01157:Ribosomal protein L21e	-
BjuVA03G33170	1.10061	-	-	-	Q42262|RS3A2_ARATH 40S ribosomal protein S3a-2 OS=Arabidopsis thaliana OX=3702 GN=RPS3AB PE=2 SV=3 PF01015:Ribosomal S3Ae family	-
BjuVA06G17810	-1.27121	-	-	-	Q9M2Y7|PP274_ARATH Pentatricopeptide repeat-containing protein At3g49710 OS=Arabidopsis thaliana OX=3702 GN=PCMP-H79 PE=2 SV=1 PF14432:DYW family of nucleic acid deaminases|PF13041:PPR repeat family	-
BjuVB03G05730	1.47226	1.38978	-	1.32245	Q93VT9|RL101_ARATH 60S ribosomal protein L10-1 OS=Arabidopsis thaliana OX=3702 GN=RPL10A PE=1 SV=1 PF00252:Ribosomal protein L16p/L10e	-
BjuVA07G36520	-1.10861	-	-	-	Q8RX77|PTR21_ARATH Protein NRT1/ PTR FAMILY 2.13 OS=Arabidopsis thaliana OX=3702 GN=NPF2.13 PE=1 SV=1 PF00854:POT family	-
BjuVA02G11650	-1.79244	-	-	-	Q9FN94|RLK0_ARATH Receptor-like protein kinase At5g59670 OS=Arabidopsis thaliana OX=3702 GN=At5g59670 PE=1 SV=1 PF12819:Malectin-like domain|PF07714:Protein tyrosine and serine/threonine kinase|PF13855:Leucine rich repeat	Pkinase_Tyr
BjuVB08G39530	1.58264	1.38187	-	-	Q5XH16|NH2L1_XENLA NHP2-like protein 1 OS=Xenopus laevis OX=8355 GN=snu13 PE=2 SV=1 PF01248:Ribosomal protein L7Ae/L30e/S12e/Gadd45 family	-
BjuVB06G56220	-1.4166	-	1.03324	-	Q9SV30|GATA8_ARATH GATA transcription factor 8 OS=Arabidopsis thaliana OX=3702 GN=GATA8 PE=1 SV=1 PF00320:GATA zinc finger	GATA
BjuVB05G18880	1.18331	-1.05193	-2.10728	-	O23553|BAM3_ARATH Beta-amylase 3, chloroplastic OS=Arabidopsis thaliana OX=3702 GN=BAM3 PE=1 SV=3 PF01373:Glycosyl hydrolase family 14	-
BjuVA09G51610	-2.07251	-	-	-	Q9SVC6|PUB22_ARATH E3 ubiquitin-protein ligase PUB22 OS=Arabidopsis thaliana OX=3702 GN=PUB22 PE=1 SV=1 PF04564:U-box domain	U-box
BjuVB08G26370	-1.85122	-	1.43165	3.36933	Q9ZQG9|E1314_ARATH Glucan endo-1,3-beta-glucosidase 14 OS=Arabidopsis thaliana OX=3702 GN=At2g27500 PE=2 SV=2 PF00332:Glycosyl hydrolases family 17	Glyco_hydro_17
BjuVA09G11800	-1.18304	-1.64947	-2.96563	-2.47176	P21216|IPYR2_ARATH Soluble inorganic pyrophosphatase 2 OS=Arabidopsis thaliana OX=3702 GN=PPA2 PE=2 SV=2 PF00719:Inorganic pyrophosphatase	Pyrophosphatase
BjuVB04G19850	-1.37889	-2.40931	-3.33255	-3.03194	F4JWM0|DSC2_ARATH Disease resistance-like protein DSC2 OS=Arabidopsis thaliana OX=3702 GN=DSC2 PE=1 SV=1 PF01582:TIR domain|PF13499:EF-hand domain pair	TIR
BjuVA03G25090	2.21744	-	-	5.12479	Q9SKE2|JAR1_ARATH Jasmonoyl--L-amino acid synthetase JAR1 OS=Arabidopsis thaliana OX=3702 GN=JAR1 PE=1 SV=2 PF03321:GH3 auxin-responsive promoter	-
BjuVA01G14400	-1.14925	-	-	-	Q42798|C93A1_SOYBN 3,9-dihydroxypterocarpan 6A-monooxygenase OS=Glycine max OX=3847 GN=CYP93A1 PE=1 SV=1 PF00067:Cytochrome P450	p450
BjuV_Contig00791G00040	-2.13269	-	-	-	Q9SN12|MYB77_ARATH Transcription factor MYB77 OS=Arabidopsis thaliana OX=3702 GN=MYB77 PE=1 SV=1 PF00249:Myb-like DNA-binding domain	Myb_DNA-binding
BjuVA05G34880	-1.34869	-	-	1.3555	Q9LUC8|C7A13_ARATH Cytochrome P450 72A13 OS=Arabidopsis thaliana OX=3702 GN=CYP72A13 PE=2 SV=1 PF00067:Cytochrome P450	p450
BjuVB07G20290	1.5329	-	1.63698	2.56824	Q708Y0|EBF2_ARATH EIN3-binding F-box protein 2 OS=Arabidopsis thaliana OX=3702 GN=EBF2 PE=1 SV=1 PF00646:F-box domain	F-box
BjuVB03G31070	1.34066	1.17654	-	-	F4I366|NRPA2_ARATH DNA-directed RNA polymerase I subunit 2 OS=Arabidopsis thaliana OX=3702 GN=NRPA2 PE=2 SV=1 PF04563:RNA polymerase beta subunit|PF04561:RNA polymerase Rpb2, domain 2|PF00562:RNA polymerase Rpb2, domain 6|PF06883:RNA polymerase I, Rpa2 specific domain|PF04565:RNA polymerase Rpb2, domain 3|PF04560:RNA polymerase Rpb2, domain 7	RNA_pol_Rpb2_6
BjuVB02G66970	-2.4806	-	-1.28112	-	Q9CAK4|ROH1_ARATH Protein ROH1 OS=Arabidopsis thaliana OX=3702 GN=ROH1 PE=1 SV=1 PF05633:Protein BYPASS1-related	-
BjuVA09G06670	-2.00237	-	1.60589	1.34883	-	-
BjuVB04G03140	-1.6135	-	-	-	O65404|ERG11_ARATH Squalene epoxidase 5 OS=Arabidopsis thaliana OX=3702 GN=SQE5 PE=2 SV=2 PF13450:NAD(P)-binding Rossmann-like domain|PF08491:Squalene epoxidase	-
BjuVB02G68300	-1.50312	-	-1.38709	-	Q9SRE5|Y1666_ARATH Uncharacterized protein At1g76660 OS=Arabidopsis thaliana OX=3702 GN=At1g76660 PE=2 SV=1 -	-
BjuVB08G10410	1.43242	-	-1.60758	-	Q9SP02|CP20A_ARATH Peptidyl-prolyl cis-trans isomerase CYP20-1 OS=Arabidopsis thaliana OX=3702 GN=CYP20-1 PE=1 SV=1 PF00160:Cyclophilin type peptidyl-prolyl cis-trans isomerase/CLD	Pro_isomerase
BjuVA07G32140	-1.72233	-	-	-	Q9SX20|PTR18_ARATH Protein NRT1/ PTR FAMILY 3.1 OS=Arabidopsis thaliana OX=3702 GN=NPF3.1 PE=2 SV=1 PF00854:POT family	-
BjuVB05G29910	2.04546	-	-	-	Q84JK8|MAKR6_ARATH Probable membrane-associated kinase regulator 6 OS=Arabidopsis thaliana OX=3702 GN=MAKR6 PE=2 SV=1 -	-
BjuVB03G05160	-1.55848	-	-	-	PF04724:Glycosyltransferase family 17	-
BjuVA08G26700	4.21931	3.55765	-	-	Q93VI3|RL171_ARATH 60S ribosomal protein L17-1 OS=Arabidopsis thaliana OX=3702 GN=RPL17A PE=2 SV=1 PF00237:Ribosomal protein L22p/L17e	-
BjuVA03G49600	-2.77843	-	-2.67817	-1.98003	Q8GXV5|UGHY_ARATH (S)-ureidoglycine aminohydrolase OS=Arabidopsis thaliana OX=3702 GN=UGLYAH PE=1 SV=1 PF07883:Cupin domain	Cupin_2
BjuV_Contig01033G00120	1.78648	-	-	-	Q9M9W8|PLDZ2_ARATH Phospholipase D zeta 2 OS=Arabidopsis thaliana OX=3702 GN=PLPZETA2 PE=1 SV=2 PF00614:Phospholipase D Active site motif|PF13091:PLD-like domain	-
BjuVB05G50040	-1.00574	-	-	1.15194	Q05431|APX1_ARATH L-ascorbate peroxidase 1, cytosolic OS=Arabidopsis thaliana OX=3702 GN=APX1 PE=1 SV=2 PF00141:Peroxidase	-
BjuVB02G64790	-1.18431	-	1.1454	-	P42043|HEMH1_ARATH Ferrochelatase-1, chloroplastic/mitochondrial OS=Arabidopsis thaliana OX=3702 GN=FC1 PE=2 SV=1 PF00762:Ferrochelatase	-
BjuVA03G43320	-1.69022	-	-	-1.87664	Q9C9H7|RLP12_ARATH Receptor-like protein 12 OS=Arabidopsis thaliana OX=3702 GN=RLP12 PE=2 SV=2 PF13855:Leucine rich repeat|PF08263:Leucine rich repeat N-terminal domain	LRRNT_2
BjuVA09G41120	-1.75128	-	-	-1.5728	Q5XF51|3MMP_ARATH Metalloendoproteinase 3-MMP OS=Arabidopsis thaliana OX=3702 GN=3MMP PE=1 SV=1 PF00413:Matrixin|PF01471:Putative peptidoglycan binding domain	PG_binding_1
BjuVA07G11560	-1.16919	-	-1.41368	-	Q9FXJ1|GDL6_ARATH GDSL esterase/lipase At1g28570 OS=Arabidopsis thaliana OX=3702 GN=At1g28570 PE=3 SV=1 PF00657:GDSL-like Lipase/Acylhydrolase	Lipase_GDSL
BjuVA09G22520	1.28245	-	-1.79436	-2.73883	Q93XM7|MCAT_ARATH Mitochondrial carnitine/acylcarnitine carrier-like protein OS=Arabidopsis thaliana OX=3702 GN=BOU PE=1 SV=1 PF00153:Mitochondrial carrier protein	Mito_carr
BjuVB02G35500	-1.03023	1.05467	-	1.06596	Q9LF33|UGDH3_ARATH UDP-glucose 6-dehydrogenase 3 OS=Arabidopsis thaliana OX=3702 GN=UGD3 PE=1 SV=1 PF03721:UDP-glucose/GDP-mannose dehydrogenase family, NAD binding domain|PF03720:UDP-glucose/GDP-mannose dehydrogenase family, UDP binding domain|PF00984:UDP-glucose/GDP-mannose dehydrogenase family, central domain	-
BjuVB06G53040	-1.74599	-	-	-2.56582	Q9M373|AGP20_ARATH Arabinogalactan protein 20 OS=Arabidopsis thaliana OX=3702 GN=AGP20 PE=1 SV=1 PF06376:Arabinogalactan peptide	-
BjuVB08G12610	-1.05806	-	-1.93665	-	Q9FIA1|GDL87_ARATH GDSL esterase/lipase At5g55050 OS=Arabidopsis thaliana OX=3702 GN=At5g55050 PE=2 SV=1 PF00657:GDSL-like Lipase/Acylhydrolase	Lipase_GDSL
BjuVA02G08330	1.81709	-	3.18489	-	Q8L8Z8|GRXS2_ARATH Monothiol glutaredoxin-S2 OS=Arabidopsis thaliana OX=3702 GN=GRXS2 PE=3 SV=1 PF00462:Glutaredoxin	-
BjuVA10G19910	1.03545	-	-	-	Q93VG5|RS81_ARATH 40S ribosomal protein S8-1 OS=Arabidopsis thaliana OX=3702 GN=RPS8A PE=1 SV=1 PF01201:Ribosomal protein S8e	-
BjuVA08G36430	-2.03519	-	-	-	-	-
BjuVA06G30640	-1.20415	-	-	-	-	-
BjuVA07G31540	-1.53245	-	-	-	PF04601:Domain of unknown function (DUF569)	-
BjuVA07G03510	-2.23589	-	-	-	-	-
BjuVB05G52610	-2.00061	-	-	-	P82280|RAV2_ARATH AP2/ERF and B3 domain-containing transcription repressor RAV2 OS=Arabidopsis thaliana OX=3702 GN=RAV2 PE=1 SV=1 PF02362:B3 DNA binding domain|PF00847:AP2 domain	B3
BjuVB03G43250	1.20283	2.56323	2.69197	3.67405	Q8W4J8|TIF7_ARATH Protein TIFY 7 OS=Arabidopsis thaliana OX=3702 GN=TIFY7 PE=1 SV=2 PF09425:Jas motif|PF06200:tify domain	Zim
BjuVB06G05530	1.03442	-	-	-	Q06611|PIP12_ARATH Aquaporin PIP1-2 OS=Arabidopsis thaliana OX=3702 GN=PIP1-2 PE=1 SV=1 PF00230:Major intrinsic protein	-
BjuVA01G29190	2.08178	-	-2.87233	-	P22953|HS701_ARATH Heat shock 70 kDa protein 1 OS=Arabidopsis thaliana OX=3702 GN=HSP70-1 PE=1 SV=3 PF00012:Hsp70 protein	HSP70
BjuVB06G36150	-1.5909	-	-	1.79045	Q0WL81|RNL_ARATH tRNA ligase 1 OS=Arabidopsis thaliana OX=3702 GN=RNL PE=1 SV=1 PF08302:Fungal tRNA ligase phosphodiesterase domain	-
BjuVA06G36170	-1.4022	-	-	-1.82153	F4K2R6|CB60G_ARATH Calmodulin-binding protein 60 G OS=Arabidopsis thaliana OX=3702 GN=CBP60G PE=1 SV=1 PF07887:Calmodulin binding protein-like	-
BjuVB08G44640	-1.31264	-	-	-	Q6GLW8|FSP1_XENLA Ferroptosis suppressor protein 1 OS=Xenopus laevis OX=8355 GN=aifm2 PE=2 SV=1 PF07992:Pyridine nucleotide-disulphide oxidoreductase	Pyr_redox_2
BjuVA09G60360	1.99341	2.89555	2.22587	3.32979	Q9SHH7|GSTUP_ARATH Glutathione S-transferase U25 OS=Arabidopsis thaliana OX=3702 GN=GSTU25 PE=1 SV=1 PF13410:Glutathione S-transferase, C-terminal domain|PF02798:Glutathione S-transferase, N-terminal domain	GST_N
BjuVB08G49100	-1.28147	-	-	-	Q9M2Y7|PP274_ARATH Pentatricopeptide repeat-containing protein At3g49710 OS=Arabidopsis thaliana OX=3702 GN=PCMP-H79 PE=2 SV=1 PF14432:DYW family of nucleic acid deaminases|PF13041:PPR repeat family	-
BjuVA06G37840	1.06001	-	-	-	Q9FKC0|R13A4_ARATH 60S ribosomal protein L13a-4 OS=Arabidopsis thaliana OX=3702 GN=RPL13AD PE=2 SV=1 PF00572:Ribosomal protein L13	-
BjuVA06G41770	-1.17184	-	-	-	Q9LI83|ALA10_ARATH Phospholipid-transporting ATPase 10 OS=Arabidopsis thaliana OX=3702 GN=ALA10 PE=3 SV=1 PF16209:Phospholipid-translocating ATPase N-terminal|PF16212:Phospholipid-translocating P-type ATPase C-terminal|PF13246:Cation transport ATPase (P-type)	-
BjuVA03G16860	1.6447	-	-	-	O04341|GRXS9_ARATH Monothiol glutaredoxin-S9 OS=Arabidopsis thaliana OX=3702 GN=GRXS9 PE=1 SV=1 PF00462:Glutaredoxin	-
BjuV_Contig00265G00090	1.09471	-	-	-	P49396|RS3A_BRACM 40S ribosomal protein S3a OS=Brassica campestris OX=3711 GN=RPS3A PE=2 SV=2 PF01015:Ribosomal S3Ae family	-
BjuVA10G31870	-1.32503	-	-	-	Q06850|CDPK1_ARATH Calcium-dependent protein kinase 1 OS=Arabidopsis thaliana OX=3702 GN=CPK1 PE=1 SV=1 PF00069:Protein kinase domain|PF13499:EF-hand domain pair	Pkinase
BjuVA03G02770	1.20649	-	-	-	Q93VH9|RS41_ARATH 40S ribosomal protein S4-1 OS=Arabidopsis thaliana OX=3702 GN=RPS4A PE=2 SV=1 PF00467:KOW motif|PF01479:S4 domain|PF08071:RS4NT (NUC023) domain|PF00900:Ribosomal family S4e|PF16121:40S ribosomal protein S4 C-terminus	Ribosomal_S4e
BjuVA10G21400	1.27727	-	-	-	Q42340|RS163_ARATH 40S ribosomal protein S16-3 OS=Arabidopsis thaliana OX=3702 GN=RPS16C PE=2 SV=1 PF00380:Ribosomal protein S9/S16	-
BjuVB04G35830	-1.44161	1.1447	1.52478	1.95537	Q9FUS6|GSTUD_ARATH Glutathione S-transferase U13 OS=Arabidopsis thaliana OX=3702 GN=GSTU13 PE=2 SV=1 PF02798:Glutathione S-transferase, N-terminal domain	GST_N
BjuVB04G14440	-1.3075	-	-	-	Q336N8|JM706_ORYSJ Lysine-specific demethylase JMJ706 OS=Oryza sativa subsp. japonica OX=39947 GN=JMJ706 PE=2 SV=1 PF02928:C5HC2 zinc finger|PF02373:JmjC domain, hydroxylase|PF02375:jmjN domain	JmjC
BjuVB06G42440	1.61794	-	-	-	P39868|NIA2_BRANA Nitrate reductase [NADH], clone PBNBR1412 OS=Brassica napus OX=3708 GN=NIA2 PE=2 SV=1 PF00174:Oxidoreductase molybdopterin binding domain|PF00173:Cytochrome b5-like Heme/Steroid binding domain|PF00175:Oxidoreductase NAD-binding domain|PF03404:Mo-co oxidoreductase dimerisation domain|PF00970:Oxidoreductase FAD-binding domain	FAD_binding_6
BjuVA06G44310	2.3708	2.14147	3.37972	1.91297	O80338|EF101_ARATH Ethylene-responsive transcription factor 2 OS=Arabidopsis thaliana OX=3702 GN=ERF2 PE=2 SV=1 PF00847:AP2 domain	AP2
BjuVA06G30790	1.05809	-	-	-	Q9LV77|ASNS2_ARATH Asparagine synthetase [glutamine-hydrolyzing] 2 OS=Arabidopsis thaliana OX=3702 GN=ASN2 PE=2 SV=1 PF00733:Asparagine synthase|PF13537:Glutamine amidotransferase domain	-
BjuVB07G16240	-1.65188	-1.38386	-1.15316	-	Q9FJX8|DAR6_ARATH Protein DA1-related 6 OS=Arabidopsis thaliana OX=3702 GN=DAR6 PE=2 SV=1 PF00412:LIM domain|PF12315:Protein DA1	LIM
BjuVB02G21420	-1.69596	-	-	-2.54755	Q9LTE2|HIP13_ARATH Heavy metal-associated isoprenylated plant protein 13 OS=Arabidopsis thaliana OX=3702 GN=HIPP13 PE=2 SV=1 -	-
BjuVB07G04320	1.48732	-	-	-	O94514|NOP56_SCHPO Nucleolar protein 56 OS=Schizosaccharomyces pombe (strain 972 / ATCC 24843) OX=284812 GN=nop56 PE=3 SV=1 PF08156:NOP5NT (NUC127) domain|PF01798:snoRNA binding domain, fibrillarin	-
BjuVA08G20920	1.14206	-	-	-	Q9T043|RL142_ARATH 60S ribosomal protein L14-2 OS=Arabidopsis thaliana OX=3702 GN=RPL14B PE=1 SV=1 PF01929:Ribosomal protein L14	-
BjuVA04G31490	-1.17122	-	-	-	Q39096|ERD15_ARATH Protein EARLY RESPONSIVE TO DEHYDRATION 15 OS=Arabidopsis thaliana OX=3702 GN=ERD15 PE=1 SV=1 -	-
BjuVB02G60260	-1.37322	-	-	-	Q8L9P8|RLF33_ARATH Protein RALF-like 33 OS=Arabidopsis thaliana OX=3702 GN=RALFL33 PE=2 SV=1 PF05498:Rapid ALkalinization Factor (RALF)	-
BjuVB02G73190	-1.27534	-	-	-	C6KIE6|XLG2_ARATH Extra-large guanine nucleotide-binding protein 2 OS=Arabidopsis thaliana OX=3702 GN=XLG2 PE=1 SV=1 PF00503:G-protein alpha subunit	G-alpha
BjuVA09G18360	1.94597	-	-	-	-	-
BjuVA02G02890	1.68287	-	-	-	Q9LEY9|NHP2_ARATH H/ACA ribonucleoprotein complex subunit 2-like protein OS=Arabidopsis thaliana OX=3702 GN=At5g08180 PE=1 SV=1 PF01248:Ribosomal protein L7Ae/L30e/S12e/Gadd45 family	-
BjuVB04G14260	-1.62783	-	-	-	Q9LVU1|VAP21_ARATH Vesicle-associated protein 2-1 OS=Arabidopsis thaliana OX=3702 GN=PVA21 PE=1 SV=1 PF00635:MSP (Major sperm protein) domain	Motile_Sperm
BjuVB05G46000	-1.08389	-	-	-	Q8H1H9|AMO_ARATH Primary amine oxidase OS=Arabidopsis thaliana OX=3702 GN=At1g62810 PE=2 SV=1 PF01179:Copper amine oxidase, enzyme domain|PF02727:Copper amine oxidase, N2 domain|PF02728:Copper amine oxidase, N3 domain	-
BjuVB01G14960	-1.26203	-	-	-1.61221	O64851|IQM4_ARATH IQ domain-containing protein IQM4 OS=Arabidopsis thaliana OX=3702 GN=IQM4 PE=2 SV=1 -	-
BjuVA10G23910	1.13811	-	-	-	Q9LXG1|RS91_ARATH 40S ribosomal protein S9-1 OS=Arabidopsis thaliana OX=3702 GN=RPS9B PE=1 SV=1 PF00163:Ribosomal protein S4/S9 N-terminal domain|PF01479:S4 domain	S4
BjuVA07G37280	1.13507	2.27524	2.89106	3.10912	Q8W4J8|TIF7_ARATH Protein TIFY 7 OS=Arabidopsis thaliana OX=3702 GN=TIFY7 PE=1 SV=2 PF06200:tify domain|PF09425:Jas motif	Zim
BjuVB06G33970	2.05016	-	-	-	Q96539|CH10_BRANA 10 kDa chaperonin OS=Brassica napus OX=3708 PE=3 SV=1 -	-
BjuVB04G06760	-1.11617	-	-	-	Q9LSI9|BIR2_ARATH Inactive LRR receptor-like serine/threonine-protein kinase BIR2 OS=Arabidopsis thaliana OX=3702 GN=BIR2 PE=1 SV=1 PF07714:Protein tyrosine and serine/threonine kinase|PF08263:Leucine rich repeat N-terminal domain	Pkinase_Tyr
BjuVB04G16290	-1.24732	-	-	-	Q9FI14|TAO1_ARATH Disease resistance protein TAO1 OS=Arabidopsis thaliana OX=3702 GN=TAO1 PE=3 SV=1 PF07725:Leucine Rich Repeat|PF00931:NB-ARC domain|PF01582:TIR domain	TIR
BjuVB06G51870	1.26734	-	-3.74373	-2.65324	F4K5X6|RVE2_ARATH Protein REVEILLE 2 OS=Arabidopsis thaliana OX=3702 GN=RVE2 PE=1 SV=1 PF00249:Myb-like DNA-binding domain	Myb_DNA-binding
BjuVA04G34350	1.40724	1.81319	1.1973	2.0774	Q9ZNV4|CYB5C_ARATH Cytochrome B5 isoform C OS=Arabidopsis thaliana OX=3702 GN=CYTB5-C PE=1 SV=1 PF00173:Cytochrome b5-like Heme/Steroid binding domain	-
BjuVA09G53430	1.51159	-	-	-	Q9XF92|BRH1_ARATH Brassinosteroid-responsive RING protein 1 OS=Arabidopsis thaliana OX=3702 GN=BRH1 PE=2 SV=1 PF13639:Ring finger domain	-
BjuVA03G20950	-1.31265	-	-	-2.92812	Q8S8P5|WRK33_ARATH Probable WRKY transcription factor 33 OS=Arabidopsis thaliana OX=3702 GN=WRKY33 PE=1 SV=2 PF03106:WRKY DNA -binding domain	WRKY
BjuVB01G05850	-1.40671	-	-	-2.86541	Q8S8P5|WRK33_ARATH Probable WRKY transcription factor 33 OS=Arabidopsis thaliana OX=3702 GN=WRKY33 PE=1 SV=2 PF03106:WRKY DNA -binding domain	WRKY
BjuVB08G47310	-2.07664	1.44855	1.02073	2.10201	Q9STT5|AB7A_ARATH ABC transporter A family member 7 OS=Arabidopsis thaliana OX=3702 GN=ABCA7 PE=3 SV=2 PF00005:ABC transporter|PF12698:ABC-2 family transporter protein	ABC_tran
BjuVB07G15070	1.16137	-	-	-	Q8L8Y0|RS21_ARATH 40S ribosomal protein S2-1 OS=Arabidopsis thaliana OX=3702 GN=RPS2A PE=2 SV=2 PF03719:Ribosomal protein S5, C-terminal domain|PF00333:Ribosomal protein S5, N-terminal domain	-
BjuVB06G32120	-1.3968	-	-	-	Q39176|ERLI1_ARATH Lipid transfer protein EARLI 1 OS=Arabidopsis thaliana OX=3702 GN=EARLI1 PE=1 SV=1 PF14547:Hydrophobic seed protein	-
BjuVA05G43150	1.18244	1.19802	-	-	Q42262|RS3A2_ARATH 40S ribosomal protein S3a-2 OS=Arabidopsis thaliana OX=3702 GN=RPS3AB PE=2 SV=3 PF01015:Ribosomal S3Ae family	-
BjuVB03G50800	1.25475	-	-	-	Q9C9S2|AUF1_ARATH F-box protein AUF1 OS=Arabidopsis thaliana OX=3702 GN=AUF1 PE=1 SV=1 -	-
BjuVB07G03170	1.23565	-	-	-	P35134|UBC11_ARATH Ubiquitin-conjugating enzyme E2 11 OS=Arabidopsis thaliana OX=3702 GN=UBC11 PE=1 SV=2 PF00179:Ubiquitin-conjugating enzyme	UQ_con
BjuVB04G22330	-1.75635	-	-	-	Q9SRE5|Y1666_ARATH Uncharacterized protein At1g76660 OS=Arabidopsis thaliana OX=3702 GN=At1g76660 PE=2 SV=1 -	-
BjuVB07G24400	-2.22949	-	-	-	Q93WU7|WRK58_ARATH Probable WRKY transcription factor 58 OS=Arabidopsis thaliana OX=3702 GN=WRKY58 PE=2 SV=2 PF03106:WRKY DNA -binding domain	WRKY
BjuVB06G54760	-1.58976	-	-	-1.44975	-	-
BjuVB08G35670	1.12508	-	-	-	O23095|RLA12_ARATH 60S acidic ribosomal protein P1-2 OS=Arabidopsis thaliana OX=3702 GN=RPP1B PE=1 SV=2 PF00428:60s Acidic ribosomal protein	-
BjuVA10G02640	1.10708	-	-	-	Q08112|RS151_ARATH 40S ribosomal protein S15-1 OS=Arabidopsis thaliana OX=3702 GN=RPS15A PE=2 SV=1 PF00203:Ribosomal protein S19	-
BjuVA09G42810	-1.93702	-1.80993	-4.14714	-2.23074	Q8VY80|FLZ5_ARATH FCS-Like Zinc finger 5 OS=Arabidopsis thaliana OX=3702 GN=FLZ5 PE=1 SV=1 PF04570:zinc-finger of the FCS-type, C2-C2	-
BjuVB06G57480	-1.94613	-	1.09901	2.20728	A0A290U7C4|ROQ1_NICBE Disease resistance protein Roq1 OS=Nicotiana benthamiana OX=4100 GN=ROQ1 PE=1 SV=1 PF00931:NB-ARC domain|PF01582:TIR domain	TIR
BjuVA06G45870	-3.86638	-	-	-	Q9FH76|ABAH3_ARATH Abscisic acid 8'-hydroxylase 3 OS=Arabidopsis thaliana OX=3702 GN=CYP707A3 PE=1 SV=1 PF00067:Cytochrome P450	p450
BjuVA02G46890	1.17919	-	-	1.81168	Q9FLT0|TSN2_ARATH Ribonuclease TUDOR 2 OS=Arabidopsis thaliana OX=3702 GN=TSN2 PE=1 SV=1 PF00565:Staphylococcal nuclease homologue|PF00567:Tudor domain	-
BjuVA06G41670	5.9947	-	4.84241	7.70034	Q9LS02|AOC2_ARATH Allene oxide cyclase 2, chloroplastic OS=Arabidopsis thaliana OX=3702 GN=AOC2 PE=1 SV=1 PF06351:Allene oxide cyclase	-
BjuVB04G34340	2.03082	-	-	-	Q9FR62|P23A_BRANA Co-chaperone protein p23-1 OS=Brassica napus OX=3708 GN=P23-1 PE=1 SV=1 PF04969:CS domain	-
BjuVA03G59720	-1.25867	-	-	-	Q9SV15|WRK11_ARATH Probable WRKY transcription factor 11 OS=Arabidopsis thaliana OX=3702 GN=WRKY11 PE=2 SV=2 PF10533:Plant zinc cluster domain|PF03106:WRKY DNA -binding domain	WRKY
BjuVB04G17610	-1.5321	1.8634	1.52576	2.74432	F4JGB6|RLP46_ARATH Receptor-like protein 46 OS=Arabidopsis thaliana OX=3702 GN=RLP46 PE=3 SV=1 PF13855:Leucine rich repeat|PF08263:Leucine rich repeat N-terminal domain	LRRNT_2
BjuVB03G11730	-2.07133	-	-	-	-	-
BjuVA09G58740	1.90498	-	-	-	Q9SIL5|PP165_ARATH Pentatricopeptide repeat-containing protein At2g20540 OS=Arabidopsis thaliana OX=3702 GN=PCMP-E78 PE=2 SV=1 PF13041:PPR repeat family|PF00226:DnaJ domain|PF01556:DnaJ C terminal domain	DnaJ_C
BjuVA03G13450	-1.57931	-	-	-	Q9FKT1|LLG1_ARATH GPI-anchored protein LLG1 OS=Arabidopsis thaliana OX=3702 GN=LLG1 PE=1 SV=1 -	-
BjuVA09G08930	-1.78405	-	-	-	-	-
BjuVB06G50810	1.39695	-	1.21112	-	P92941|CLCA_ARATH Chloride channel protein CLC-a OS=Arabidopsis thaliana OX=3702 GN=CLC-A PE=1 SV=2 PF00654:Voltage gated chloride channel	Voltage_CLC
BjuVB05G18590	-2.58554	-	-	-2.90967	Q8VZ91|EF103_ARATH Ethylene-responsive transcription factor 6 OS=Arabidopsis thaliana OX=3702 GN=ERF6 PE=1 SV=2 PF00847:AP2 domain	AP2
BjuVA04G33550	1.51737	-	-1.47018	-	O80506|FLZ3_ARATH FCS-Like Zinc finger 3 OS=Arabidopsis thaliana OX=3702 GN=FLZ3 PE=1 SV=1 -	-
BjuVB08G11790	1.72579	-	-	-	-	-
BjuVB05G11380	1.0826	-2.55086	-2.2227	-2.76228	Q9SZZ8|BCH1_ARATH Beta-carotene 3-hydroxylase 1, chloroplastic OS=Arabidopsis thaliana OX=3702 GN=BETA-OHASE 1 PE=1 SV=1 PF04116:Fatty acid hydroxylase superfamily	-
BjuVA05G03520	1.42231	1.33367	-	-	PF04554:Extensin-like region	-
BjuVB08G52480	1.04466	-1.63893	-1.70833	-1.4008	P43286|PIP21_ARATH Aquaporin PIP2-1 OS=Arabidopsis thaliana OX=3702 GN=PIP2-1 PE=1 SV=1 PF00230:Major intrinsic protein	-
BjuVA02G06360	-1.29458	-	1.03048	-	P46690|GASA4_ARATH Gibberellin-regulated protein 4 OS=Arabidopsis thaliana OX=3702 GN=GASA4 PE=1 SV=2 PF02704:Gibberellin regulated protein	-
BjuVB08G04990	-2.54252	-	-	-1.96044	F4I594|RLM1A_ARATH Disease resistance protein RML1A OS=Arabidopsis thaliana OX=3702 GN=RLM1A PE=3 SV=1 PF01582:TIR domain	TIR
BjuVB05G54600	-1.17586	-	-	-	Q9C9H6|RLP11_ARATH Receptor-like protein 11 OS=Arabidopsis thaliana OX=3702 GN=RLP11 PE=3 SV=1 PF13855:Leucine rich repeat|PF08263:Leucine rich repeat N-terminal domain	LRRNT_2
BjuVA02G09900	1.94502	-	1.34336	2.02804	Q8LPL3|ASO_ARATH L-ascorbate oxidase OS=Arabidopsis thaliana OX=3702 GN=AAO PE=1 SV=1 PF00394:Multicopper oxidase|PF07732:Multicopper oxidase|PF07731:Multicopper oxidase	-
BjuVB05G53490	-1.45428	-	1.29347	-	PF04601:Domain of unknown function (DUF569)	-
BjuVA09G21200	-1.72904	-	-	1.54574	Q9CYW4|HDHD3_MOUSE Haloacid dehalogenase-like hydrolase domain-containing protein 3 OS=Mus musculus OX=10090 GN=Hdhd3 PE=1 SV=1 PF00702:haloacid dehalogenase-like hydrolase	Hydrolase
BjuVA02G24650	-1.11923	-	-	-	Q9FWS6|BBD1_ARATH Bifunctional nuclease 1 OS=Arabidopsis thaliana OX=3702 GN=BBD1 PE=2 SV=1 PF02577:Domain of unknown function (DUF151)	-
BjuVB01G20130	-1.3064	-	-	-	P25070|CML24_ARATH Calcium-binding protein CML24 OS=Arabidopsis thaliana OX=3702 GN=CML24 PE=2 SV=2 PF13499:EF-hand domain pair	-
BjuVA05G01200	-1.49035	-	1.57337	1.32852	F4IJ77|AATP4_ARATH AAA-ATPase At2g46620 OS=Arabidopsis thaliana OX=3702 GN=At2g46620 PE=2 SV=1 PF00004:ATPase family associated with various cellular activities (AAA)|PF14363:Domain associated at C-terminal with AAA	AAA
BjuVB01G13820	2.73142	-	-	-	Q681X4|ZAT5_ARATH Zinc finger protein ZAT5 OS=Arabidopsis thaliana OX=3702 GN=ZAT5 PE=2 SV=1 PF13912:C2H2-type zinc finger	-
BjuVB02G71670	-1.13824	-	-	-1.20999	Q9SV15|WRK11_ARATH Probable WRKY transcription factor 11 OS=Arabidopsis thaliana OX=3702 GN=WRKY11 PE=2 SV=2 PF10533:Plant zinc cluster domain|PF03106:WRKY DNA -binding domain	WRKY
BjuVB01G24580	1.65354	3.5983	3.9857	5.10113	-	-
BjuVB06G01080	-1.56154	-	-	-	-	-
BjuVA09G00640	-1.05324	-	-	-	O80462|XLG1_ARATH Extra-large guanine nucleotide-binding protein 1 OS=Arabidopsis thaliana OX=3702 GN=XLG1 PE=1 SV=2 PF11331:Probable zinc-ribbon domain	-
BjuVA06G35740	-1.59402	-	1.5611	1.77413	Q94AZ2|STP13_ARATH Sugar transport protein 13 OS=Arabidopsis thaliana OX=3702 GN=STP13 PE=1 SV=2 PF00083:Sugar (and other) transporter	Sugar_tr
BjuVA05G06590	1.20571	-1.92426	-2.10442	-3.2825	P10896|RCA_ARATH Ribulose bisphosphate carboxylase/oxygenase activase, chloroplastic OS=Arabidopsis thaliana OX=3702 GN=RCA PE=1 SV=2 PF00004:ATPase family associated with various cellular activities (AAA)	AAA
BjuVB05G55850	-1.18263	-	-	-	Q8LE58|CHM1A_ARATH ESCRT-related protein CHMP1A OS=Arabidopsis thaliana OX=3702 GN=CHMP1A PE=1 SV=1 PF03357:Snf7	ESCRT-III
BjuV_Contig00876G00030	1.14009	1.14531	-	-	Q9C9Z2|RER3_ARATH Protein RETICULATA-RELATED 3, chloroplastic OS=Arabidopsis thaliana OX=3702 GN=RER3 PE=1 SV=1 PF11891:Protein RETICULATA-related	-
BjuVB05G19240	1.05784	-	-	-	O23515|RL151_ARATH 60S ribosomal protein L15-1 OS=Arabidopsis thaliana OX=3702 GN=RPL15A PE=2 SV=1 PF00827:Ribosomal L15	-
BjuVA02G12380	-1.77853	-	-	-	Q9FGH9|E70B1_ARATH Exocyst complex component EXO70B1 OS=Arabidopsis thaliana OX=3702 GN=EXO70B1 PE=1 SV=1 PF03081:Exo70 exocyst complex subunit	Exo70
BjuVB04G16370	-1.24109	-	-	-2.58298	P33077|IAA4_ARATH Auxin-responsive protein IAA4 OS=Arabidopsis thaliana OX=3702 GN=IAA4 PE=1 SV=2 PF02309:AUX/IAA family	-
BjuVB08G25490	1.07205	-	-	-	O22263|PDI21_ARATH Protein disulfide-isomerase like 2-1 OS=Arabidopsis thaliana OX=3702 GN=PDIL2-1 PE=2 SV=1 PF00085:Thioredoxin|PF07749:Endoplasmic reticulum protein ERp29, C-terminal domain	-
BjuVA06G15410	-1.22082	-	-	-	Q93VH2|BBD2_ARATH Bifunctional nuclease 2 OS=Arabidopsis thaliana OX=3702 GN=BBD2 PE=2 SV=1 PF02577:Domain of unknown function (DUF151)	-
BjuVA02G09350	1.02686	-	-	-	Q93VG5|RS81_ARATH 40S ribosomal protein S8-1 OS=Arabidopsis thaliana OX=3702 GN=RPS8A PE=1 SV=1 PF01201:Ribosomal protein S8e	-
BjuVB08G17750	1.24302	-	-	-	P51418|R18A2_ARATH 60S ribosomal protein L18a-2 OS=Arabidopsis thaliana OX=3702 GN=RPL18AB PE=1 SV=2 PF01775:Ribosomal proteins 50S-L18Ae/60S-L20/60S-L18A	-
BjuVA03G38250	-1.31136	-	-	-	C0LGN2|Y3148_ARATH Probable leucine-rich repeat receptor-like serine/threonine-protein kinase At3g14840 OS=Arabidopsis thaliana OX=3702 GN=LRR-RLK PE=1 SV=1 PF07714:Protein tyrosine and serine/threonine kinase|PF11721:Malectin domain	Pkinase_Tyr
BjuVA05G25420	1.26691	-	-	-	Q9FVQ6|PILR1_ARATH Pinoresinol reductase 1 OS=Arabidopsis thaliana OX=3702 GN=PRR1 PE=1 SV=1 PF05368:NmrA-like family	NmrA
BjuVB03G02840	-1.34946	-	-	-	O04023|SRC2_ARATH Protein SRC2 homolog OS=Arabidopsis thaliana OX=3702 GN=SRC2 PE=1 SV=1 PF00168:C2 domain	C2
BjuVB08G34890	1.08866	-	-1.90014	-1.63702	Q39196|PIP14_ARATH Probable aquaporin PIP1-4 OS=Arabidopsis thaliana OX=3702 GN=PIP1.4 PE=1 SV=1 PF00230:Major intrinsic protein	-
BjuVB04G37380	-2.2487	-	-	-	-	-
BjuVB06G22150	1.50699	-	-	-	Q8L7B5|CH60B_ARATH Chaperonin CPN60-like 1, mitochondrial OS=Arabidopsis thaliana OX=3702 GN=At2g33210 PE=1 SV=1 PF00118:TCP-1/cpn60 chaperonin family	-
BjuVA01G36460	-1.5847	-	-	-1.27927	Q9SSW2|AZF2_ARATH Zinc finger protein AZF2 OS=Arabidopsis thaliana OX=3702 GN=AZF2 PE=2 SV=1 PF13912:C2H2-type zinc finger	-
BjuVA03G22130	-1.82274	1.59433	-1.85489	-	O04211|ELF4_ARATH Protein EARLY FLOWERING 4 OS=Arabidopsis thaliana OX=3702 GN=ELF4 PE=1 SV=1 PF07011:Early Flowering 4 domain	-
BjuVA02G46780	-2.12511	-	-	-3.74023	Q9FKG1|EF104_ARATH Ethylene-responsive transcription factor ERF104 OS=Arabidopsis thaliana OX=3702 GN=ERF104 PE=1 SV=1 PF00847:AP2 domain	AP2
BjuVB05G05980	-1.13485	-	-	-	-	-
BjuVB05G33610	1.29819	-	-1.12397	-	Q8H1Z0|CER3_ARATH Very-long-chain aldehyde decarbonylase CER3 OS=Arabidopsis thaliana OX=3702 GN=CER3 PE=1 SV=1 PF12076:WAX2 C-terminal domain|PF04116:Fatty acid hydroxylase superfamily	-
BjuVA09G68970	-1.06666	-	-1.08058	-	Q9MAM1|CIPK9_ARATH CBL-interacting serine/threonine-protein kinase 9 OS=Arabidopsis thaliana OX=3702 GN=CIPK9 PE=1 SV=2 PF03822:NAF domain|PF00069:Protein kinase domain	Pkinase
BjuVA05G08210	1.09882	-	-	-	O80929|RL361_ARATH 60S ribosomal protein L36-1 OS=Arabidopsis thaliana OX=3702 GN=RPL36A PE=3 SV=1 PF01158:Ribosomal protein L36e	-
BjuV_Contig00457G00070	-1.23566	-	-	-	Q9LME4|P2C09_ARATH Probable protein phosphatase 2C 9 OS=Arabidopsis thaliana OX=3702 GN=At1g22280 PE=1 SV=1 PF00481:Protein phosphatase 2C	PP2C
BjuVA09G47310	1.87622	-	1.89763	2.83885	Q9M1J6|SSL9_ARATH Protein STRICTOSIDINE SYNTHASE-LIKE 9 OS=Arabidopsis thaliana OX=3702 GN=SSL9 PE=2 SV=1 PF03088:Strictosidine synthase	Str_synth
BjuVA09G37170	-1.54021	-	-	-	Q9C7R6|PUB17_ARATH U-box domain-containing protein 17 OS=Arabidopsis thaliana OX=3702 GN=PUB17 PE=2 SV=1 PF00514:Armadillo/beta-catenin-like repeat|PF04564:U-box domain	U-box
BjuVB05G50280	-1.41745	-	-	-	Q9C8Y3|RGL1_ARATH DELLA protein RGL1 OS=Arabidopsis thaliana OX=3702 GN=RGL1 PE=1 SV=1 PF12041:Transcriptional regulator DELLA protein N terminal|PF03514:GRAS domain family	GRAS
BjuVA08G20030	2.16755	4.7291	6.29463	6.33039	P27061|PPA1_SOLLC Acid phosphatase 1 OS=Solanum lycopersicum OX=4081 GN=APS1 PE=2 SV=1 PF03767:HAD superfamily, subfamily IIIB (Acid phosphatase)	-
BjuVA02G47490	-1.32944	-	-	-	Q24JK1|MYB96_ARATH Transcription factor MYB96 OS=Arabidopsis thaliana OX=3702 GN=MYB96 PE=2 SV=1 PF00249:Myb-like DNA-binding domain	Myb_DNA-binding
BjuVA04G11220	-1.41053	-	-1.44382	-	Q56WN1|GLN11_ARATH Glutamine synthetase cytosolic isozyme 1-1 OS=Arabidopsis thaliana OX=3702 GN=GLN1-1 PE=1 SV=2 PF03951:Glutamine synthetase, beta-Grasp domain|PF00120:Glutamine synthetase, catalytic domain	-
BjuVA01G40560	-1.55492	-	-	-	Q9LUL4|SRF7_ARATH Protein STRUBBELIG-RECEPTOR FAMILY 7 OS=Arabidopsis thaliana OX=3702 GN=SRF7 PE=1 SV=1 PF08263:Leucine rich repeat N-terminal domain|PF07714:Protein tyrosine and serine/threonine kinase	Pkinase_Tyr
BjuVA03G16950	1.05455	1.2532	-	-	O80852|GSTF9_ARATH Glutathione S-transferase F9 OS=Arabidopsis thaliana OX=3702 GN=GSTF9 PE=1 SV=1 PF02798:Glutathione S-transferase, N-terminal domain|PF00043:Glutathione S-transferase, C-terminal domain	GST_C
BjuVA04G31780	1.60884	1.84742	-	-	P48421|C83A1_ARATH Cytochrome P450 83A1 OS=Arabidopsis thaliana OX=3702 GN=CYP83A1 PE=1 SV=2 PF14223:gag-polypeptide of LTR copia-type|PF13961:Domain of unknown function (DUF4219)|PF00067:Cytochrome P450	p450
BjuVA05G08490	-1.30813	-	-	-	Q9ZUT8|AB33G_ARATH ABC transporter G family member 33 OS=Arabidopsis thaliana OX=3702 GN=ABCG33 PE=2 SV=1 PF00005:ABC transporter|PF19055:ABC-2 type transporter|PF14510:ABC-transporter N-terminal|PF01061:ABC-2 type transporter|PF08370:Plant PDR ABC transporter associated	ABC2_membrane
BjuVA03G01500	2.18015	-	-	-	Q9FYE6|BH101_ARATH Transcription factor bHLH101 OS=Arabidopsis thaliana OX=3702 GN=BHLH101 PE=1 SV=1 PF00010:Helix-loop-helix DNA-binding domain	HLH
BjuVB04G28550	2.48673	-	2.65082	-	Q94KE0|ESL1_ARATH Sugar transporter ESL1 OS=Arabidopsis thaliana OX=3702 GN=ESL1 PE=1 SV=1 PF00083:Sugar (and other) transporter	Sugar_tr
BjuVB03G17520	-1.07381	-	-	-	-	-
BjuVB06G39450	1.1697	-	-	-	P49690|RL23_ARATH 60S ribosomal protein L23 OS=Arabidopsis thaliana OX=3702 GN=RPL23A PE=2 SV=3 PF00238:Ribosomal protein L14p/L23e	-
BjuVA03G18720	1.30054	-	-	-	Q5ZKD5|RRP12_CHICK RRP12-like protein OS=Gallus gallus OX=9031 GN=RRP12 PE=2 SV=1 PF08161:NUC173 domain	NUC173
BjuVB08G13100	1.41325	-1.97199	-	-4.30368	Q9FN28|U79B9_ARATH UDP-glycosyltransferase 79B9 OS=Arabidopsis thaliana OX=3702 GN=UGT79B9 PE=2 SV=1 PF00201:UDP-glucoronosyl and UDP-glucosyl transferase	UDPGT
BjuVA08G12160	1.80639	-	-	-	Q8L8Z1|CSPLO_ARATH CASP-like protein 1E1 OS=Arabidopsis thaliana OX=3702 GN=At4g15630 PE=1 SV=2 PF04535:Domain of unknown function (DUF588)	-
BjuVB05G07270	2.65827	2.8839	3.48961	3.57454	-	-
BjuVA07G18700	-1.23711	-	-	-	P56941|NPC1_PIG NPC intracellular cholesterol transporter 1 OS=Sus scrofa OX=9823 GN=NPC1 PE=2 SV=1 PF02460:Patched family|PF16414:Niemann-Pick C1 N terminus	-
BjuVA09G25390	-1.17755	-1.0146	-1.16327	-1.42491	Q94AP0|ALN_ARATH Allantoinase OS=Arabidopsis thaliana OX=3702 GN=ALN PE=1 SV=1 PF01979:Amidohydrolase family	Amidohydro_1
BjuVB07G21440	-2.28319	-	1.40511	-	Q8LGA5|ATL31_ARATH E3 ubiquitin-protein ligase ATL31 OS=Arabidopsis thaliana OX=3702 GN=ATL31 PE=1 SV=2 PF13639:Ring finger domain	-
BjuVB03G30970	-1.05943	-	-	-	Q9ASQ6|Y1972_ARATH Probable LRR receptor-like serine/threonine-protein kinase At1g29720 OS=Arabidopsis thaliana OX=3702 GN=RFK1 PE=2 SV=3 PF07714:Protein tyrosine and serine/threonine kinase|PF13855:Leucine rich repeat|PF11721:Malectin domain	Pkinase_Tyr
BjuVA09G41160	1.31258	1.30975	-	1.54685	O48676|U74B1_ARATH UDP-glycosyltransferase 74B1 OS=Arabidopsis thaliana OX=3702 GN=UGT74B1 PE=1 SV=1 PF00201:UDP-glucoronosyl and UDP-glucosyl transferase	UDPGT
BjuVB03G55550	-1.91096	-	-	-	-	-
BjuVA03G17360	1.32123	-	1.01652	1.285	O04922|GPX2_ARATH Probable glutathione peroxidase 2 OS=Arabidopsis thaliana OX=3702 GN=GPX2 PE=1 SV=1 PF00255:Glutathione peroxidase	GSHPx
BjuV_Contig00792G00060	-3.11217	-	-	-	Q9SFE4|ERF12_ARATH Ethylene-responsive transcription factor ERF012 OS=Arabidopsis thaliana OX=3702 GN=ERF012 PE=2 SV=1 PF00847:AP2 domain	AP2
BjuVA05G07360	-1.4712	-	-	-1.63974	Q8S8P5|WRK33_ARATH Probable WRKY transcription factor 33 OS=Arabidopsis thaliana OX=3702 GN=WRKY33 PE=1 SV=2 PF03106:WRKY DNA -binding domain	WRKY
BjuVA10G28540	1.14354	-1.33222	-3.16588	-3.25241	Q96330|FLS1_ARATH Flavonol synthase/flavanone 3-hydroxylase OS=Arabidopsis thaliana OX=3702 GN=FLS1 PE=1 SV=1 PF14226:non-haem dioxygenase in morphine synthesis N-terminal|PF03171:2OG-Fe(II) oxygenase superfamily	2OG-FeII_Oxy
BjuVB03G22100	1.19865	-	-	-	Q9SF53|RL351_ARATH 60S ribosomal protein L35-1 OS=Arabidopsis thaliana OX=3702 GN=RPL35A PE=2 SV=1 PF00831:Ribosomal L29 protein	-
BjuVB06G08610	1.75311	-	-	-	Q9SJL9|XTH32_ARATH Probable xyloglucan endotransglucosylase/hydrolase protein 32 OS=Arabidopsis thaliana OX=3702 GN=XTH32 PE=2 SV=1 PF00722:Glycosyl hydrolases family 16|PF06955:Xyloglucan endo-transglycosylase (XET) C-terminus	-
BjuVB06G26380	-1.45732	-	-	-	-	-
BjuVA07G33620	-1.36581	-	-	1.57586	Q94EH8|THO4C_ARATH THO complex subunit 4C OS=Arabidopsis thaliana OX=3702 GN=ALY3 PE=1 SV=1 PF00076:RNA recognition motif. (a.k.a. RRM, RBD, or RNP domain)|PF13865:C-terminal duplication domain of Friend of PRMT1	RRM_1
BjuVA01G03430	-2.45064	-	-2.24807	-	Q84WE9|LHTL7_ARATH Lysine histidine transporter-like 7 OS=Arabidopsis thaliana OX=3702 GN=At4g35180 PE=2 SV=2 PF01490:Transmembrane amino acid transporter protein	Aa_trans
BjuVB08G15580	1.06764	-	-	-	O80852|GSTF9_ARATH Glutathione S-transferase F9 OS=Arabidopsis thaliana OX=3702 GN=GSTF9 PE=1 SV=1 PF02798:Glutathione S-transferase, N-terminal domain|PF00043:Glutathione S-transferase, C-terminal domain	GST_N
BjuVB06G55440	1.25527	-	-	-	-	-
BjuVA06G09840	-1.88956	-	-	-	Q6R8G7|PHO13_ARATH Phosphate transporter PHO1 homolog 3 OS=Arabidopsis thaliana OX=3702 GN=PHO1;H3 PE=2 SV=2 PF03105:SPX domain|PF03124:EXS family	SPX
BjuVB01G40840	1.0398	-	1.03531	-	Q9SCW1|BGAL1_ARATH Beta-galactosidase 1 OS=Arabidopsis thaliana OX=3702 GN=BGAL1 PE=2 SV=1 PF01301:Glycosyl hydrolases family 35|PF17834:Beta-sandwich domain in beta galactosidase|PF02140:Galactose binding lectin domain	-
BjuVA08G00120	1.29404	1.44876	-	-	O94514|NOP56_SCHPO Nucleolar protein 56 OS=Schizosaccharomyces pombe (strain 972 / ATCC 24843) OX=284812 GN=nop56 PE=3 SV=1 PF01798:snoRNA binding domain, fibrillarin|PF08156:NOP5NT (NUC127) domain	-
BjuVA05G12660	-1.58627	-	-	-1.40411	-	-
BjuVA02G05700	1.52269	1.95318	-	1.5828	Q9FMT1|LEU31_ARATH 3-isopropylmalate dehydrogenase 1, chloroplastic OS=Arabidopsis thaliana OX=3702 GN=IMDH1 PE=1 SV=1 PF00180:Isocitrate/isopropylmalate dehydrogenase	-
BjuVA10G21970	1.4464	-	-	-	Q8L616|DTX25_ARATH Protein DETOXIFICATION 25 OS=Arabidopsis thaliana OX=3702 GN=DTX25 PE=2 SV=1 PF01554:MatE	MatE
BjuVA07G35240	3.11492	-	-	3.58567	-	-
BjuVA09G45330	1.88544	-	-	2.29	Q5ZK33|LETM1_CHICK Mitochondrial proton/calcium exchanger protein OS=Gallus gallus OX=9031 GN=LETM1 PE=2 SV=1 PF07766:LETM1-like protein	-
BjuVB04G00720	-1.65531	-	-	-	PF05340:Protein of unknown function (DUF740)	-
BjuVA07G09870	-1.3412	-	-	-	Q9SHE8|PSAF_ARATH Photosystem I reaction center subunit III, chloroplastic OS=Arabidopsis thaliana OX=3702 GN=PSAF PE=1 SV=1 PF02507:Photosystem I reaction centre subunit III	-
BjuVA06G05100	1.14488	-	-1.17011	-	O64654|TRL11_ARATH Thioredoxin-like 1-1, chloroplastic OS=Arabidopsis thaliana OX=3702 GN=At1g08570 PE=2 SV=1 PF00085:Thioredoxin	-
BjuVA02G33320	1.28078	-	-	-	P49209|RL91_ARATH 60S ribosomal protein L9-1 OS=Arabidopsis thaliana OX=3702 GN=RPL9B PE=1 SV=3 PF00347:Ribosomal protein L6	-
BjuVA02G27140	-1.39962	-	-	1.28886	Q9LJE5|ECT2_ARATH YTH domain-containing protein ECT2 OS=Arabidopsis thaliana OX=3702 GN=ECT2 PE=1 SV=1 PF04146:YT521-B-like domain	YTH
BjuVA08G14430	-1.1433	-	-	-	-	-
BjuVA05G05660	-1.14249	-	-1.26021	-	O80842|CFTSY_ARATH Cell division protein FtsY homolog, chloroplastic OS=Arabidopsis thaliana OX=3702 GN=CPFTSY PE=1 SV=2 PF00448:SRP54-type protein, GTPase domain|PF02881:SRP54-type protein, helical bundle domain	-
BjuVB07G08620	1.86245	1.62096	-	1.72865	Q9LRN8|RK3B_ARATH 50S ribosomal protein L3-2, mitochondrial OS=Arabidopsis thaliana OX=3702 GN=RPL3B PE=1 SV=1 PF00297:Ribosomal protein L3	-
BjuVB07G25240	1.41431	-	-	-	Q9SRV5|METE2_ARATH 5-methyltetrahydropteroyltriglutamate--homocysteine methyltransferase 2 OS=Arabidopsis thaliana OX=3702 GN=MS2 PE=1 SV=1 PF01717:Cobalamin-independent synthase, Catalytic domain|PF08267:Cobalamin-independent synthase, N-terminal domain	-
BjuVA06G46950	-1.21987	-	-	-	Q8VXY9|UAH_ARATH Ureidoglycolate hydrolase OS=Arabidopsis thaliana OX=3702 GN=UAH PE=1 SV=1 PF01546:Peptidase family M20/M25/M40	Peptidase_M20
BjuVB06G00150	1.22829	-	-	-	O22263|PDI21_ARATH Protein disulfide-isomerase like 2-1 OS=Arabidopsis thaliana OX=3702 GN=PDIL2-1 PE=2 SV=1 PF00085:Thioredoxin|PF07749:Endoplasmic reticulum protein ERp29, C-terminal domain	-
BjuVB07G15320	-2.38878	1.22346	2.38129	-	Q9C508|PUP18_ARATH Probable purine permease 18 OS=Arabidopsis thaliana OX=3702 GN=PUP18 PE=1 SV=1 PF16913:Purine nucleobase transmembrane transport	-
BjuVA08G35100	-1.66716	-	1.46222	-	P94014|GL21_ARATH Germin-like protein subfamily 2 member 1 OS=Arabidopsis thaliana OX=3702 GN=GLP4 PE=2 SV=2 PF00190:Cupin	-
BjuVB07G49220	-1.31876	-	-1.66095	-	Q9C891|DIR20_ARATH Dirigent protein 20 OS=Arabidopsis thaliana OX=3702 GN=DIR20 PE=2 SV=1 PF03018:Dirigent-like protein	-
BjuVB05G26640	1.37713	-	-	-	Q9LEY9|NHP2_ARATH H/ACA ribonucleoprotein complex subunit 2-like protein OS=Arabidopsis thaliana OX=3702 GN=At5g08180 PE=1 SV=1 PF01248:Ribosomal protein L7Ae/L30e/S12e/Gadd45 family	-
BjuVB04G17510	1.5462	-	-	-	O04267|SAR1B_BRACM GTP-binding protein SAR1B OS=Brassica campestris OX=3711 GN=SAR1B PE=2 SV=1 PF00025:ADP-ribosylation factor family	Arf
BjuVB04G15590	1.06265	-	-	-	P39207|NDK1_ARATH Nucleoside diphosphate kinase 1 OS=Arabidopsis thaliana OX=3702 GN=NDK1 PE=1 SV=1 PF00334:Nucleoside diphosphate kinase	NDK
BjuVA09G61280	-1.36799	-	-	-	Q9M9E0|LRKS1_ARATH L-type lectin-domain containing receptor kinase S.1 OS=Arabidopsis thaliana OX=3702 GN=LECRKS1 PE=1 SV=1 PF00139:Legume lectin domain|PF00069:Protein kinase domain	Pkinase
BjuVB08G47060	-1.11972	-	-	-	C0LGP4|Y3475_ARATH Probable LRR receptor-like serine/threonine-protein kinase At3g47570 OS=Arabidopsis thaliana OX=3702 GN=At3g47570 PE=2 SV=1 PF00069:Protein kinase domain|PF08263:Leucine rich repeat N-terminal domain	Pkinase
BjuVA05G20650	1.27325	1.92895	-	1.86631	Q9FVQ1|NUCL1_ARATH Nucleolin 1 OS=Arabidopsis thaliana OX=3702 GN=NUCL1 PE=1 SV=1 PF00076:RNA recognition motif. (a.k.a. RRM, RBD, or RNP domain)	RRM_1
BjuVB05G36730	-1.05654	-	-	-	Q9FNJ8|AROD5_ARATH Arogenate dehydratase 5, chloroplastic OS=Arabidopsis thaliana OX=3702 GN=ADT5 PE=1 SV=1 PF00800:Prephenate dehydratase	-
BjuVB02G28710	1.26531	-	-	-	Q9LX88|R15A4_ARATH 40S ribosomal protein S15a-4 OS=Arabidopsis thaliana OX=3702 GN=RPS15AD PE=2 SV=3 PF00410:Ribosomal protein S8	-
BjuVB05G52030	-2.20901	-	-	-	PF07797:Protein of unknown function (DUF1639)	-
BjuVB04G15060	1.19734	-	-	-	P42795|RL111_ARATH 60S ribosomal protein L11-1 OS=Arabidopsis thaliana OX=3702 GN=RPL11A PE=2 SV=2 PF00281:Ribosomal protein L5|PF00673:ribosomal L5P family C-terminus	-
BjuVB05G10380	1.0218	-1.89055	-2.33634	-3.06639	Q8RWE8|GGAP1_ARATH GDP-L-galactose phosphorylase 1 OS=Arabidopsis thaliana OX=3702 GN=VTC2 PE=1 SV=1 -	-
BjuVB08G49970	-2.06017	-	-	-3.66884	PF14009:Domain of unknown function (DUF4228)	-
BjuVB02G40840	1.774	-	-	-	Q9LEY9|NHP2_ARATH H/ACA ribonucleoprotein complex subunit 2-like protein OS=Arabidopsis thaliana OX=3702 GN=At5g08180 PE=1 SV=1 PF01248:Ribosomal protein L7Ae/L30e/S12e/Gadd45 family	-
BjuVB08G33670	-1.61861	-	-	-	PF11331:Probable zinc-ribbon domain	-
BjuVB04G28300	1.10897	-	-	-	Q38858|CALR2_ARATH Calreticulin-2 OS=Arabidopsis thaliana OX=3702 GN=CRT2 PE=1 SV=3 PF00262:Calreticulin family	-
BjuVB07G25880	1.13773	-	-	-	Q42262|RS3A2_ARATH 40S ribosomal protein S3a-2 OS=Arabidopsis thaliana OX=3702 GN=RPS3AB PE=2 SV=3 PF01015:Ribosomal S3Ae family	-
BjuVB06G08790	1.08648	-	-	-	P38666|RL242_ARATH 60S ribosomal protein L24-2 OS=Arabidopsis thaliana OX=3702 GN=RPL24B PE=1 SV=2 PF01246:Ribosomal protein L24e	-
BjuVB01G46040	-1.12442	-	-	-	Q9M8Z8|PLY8_ARATH Probable pectate lyase 8 OS=Arabidopsis thaliana OX=3702 GN=At3g07010 PE=2 SV=1 PF00544:Pectate lyase	-
BjuVB08G15440	-1.31859	-	-	-	Q84VY2|NET4B_ARATH Protein NETWORKED 4B OS=Arabidopsis thaliana OX=3702 GN=NET4B PE=2 SV=1 PF07765:KIP1-like protein	-
BjuVA10G21780	1.34036	1.17573	-	1.85497	Q02166|TRPD_ARATH Anthranilate phosphoribosyltransferase, chloroplastic OS=Arabidopsis thaliana OX=3702 GN=PAT1 PE=2 SV=1 PF02885:Glycosyl transferase family, helical bundle domain|PF00591:Glycosyl transferase family, a/b domain	Glycos_trans_3N
BjuVA09G50630	1.03494	-2.01541	-1.62434	-2.23861	P43286|PIP21_ARATH Aquaporin PIP2-1 OS=Arabidopsis thaliana OX=3702 GN=PIP2-1 PE=1 SV=1 PF00230:Major intrinsic protein	-
BjuVA09G03240	-1.33859	-	-	-	Q9LHA7|PER31_ARATH Peroxidase 31 OS=Arabidopsis thaliana OX=3702 GN=PER31 PE=2 SV=1 PF00141:Peroxidase	-
BjuVB07G45330	-1.86919	-	-	-2.2163	PF00582:Universal stress protein family	Usp
BjuVA07G40990	-1.52213	1.04153	1.36183	1.245	Q9FWS1|AUL1_ARATH Auxilin-like protein 1 OS=Arabidopsis thaliana OX=3702 GN=AUL1 PE=2 SV=2 -	-
BjuVA03G00240	-1.14857	-	-	-	Q96540|FRI1_BRANA Ferritin-1, chloroplastic OS=Brassica napus OX=3708 GN=LSC30 PE=2 SV=1 PF00210:Ferritin-like domain	Ferritin
BjuVA02G17440	-1.60487	-	-	-	-	-
BjuVA05G30880	1.77002	-	-	-	Q9LS99|ATL77_ARATH RING-H2 finger protein ATL77 OS=Arabidopsis thaliana OX=3702 GN=ATL77 PE=2 SV=1 PF13639:Ring finger domain	-
BjuVA04G27930	1.28756	-	-	-	Q9SJQ9|ALFC6_ARATH Fructose-bisphosphate aldolase 6, cytosolic OS=Arabidopsis thaliana OX=3702 GN=FBA6 PE=1 SV=1 PF00274:Fructose-bisphosphate aldolase class-I	-
BjuVA02G05090	-1.50312	-	-	-	Q9LYV6|GEML5_ARATH GEM-like protein 5 OS=Arabidopsis thaliana OX=3702 GN=At5g13200 PE=1 SV=1 PF02893:GRAM domain	GRAM
BjuVB04G05500	1.09447	-	-	-	Q9FKC0|R13A4_ARATH 60S ribosomal protein L13a-4 OS=Arabidopsis thaliana OX=3702 GN=RPL13AD PE=2 SV=1 PF00572:Ribosomal protein L13	-
BjuVA09G08800	-1.01387	-	-	-	-	-
BjuVA09G59890	1.0406	-	-	-	Q39336|GBLP_BRANA Guanine nucleotide-binding protein subunit beta-like protein OS=Brassica napus OX=3708 GN=GB1 PE=2 SV=1 PF00400:WD domain, G-beta repeat	WD40
BjuVA05G03510	1.70623	1.56133	-	-	-	-
BjuVA08G38370	1.78501	-3.45862	-2.90677	-3.82228	Q6R0H1|LHY_ARATH Protein LHY OS=Arabidopsis thaliana OX=3702 GN=LHY PE=1 SV=2 PF00249:Myb-like DNA-binding domain	Myb_DNA-binding
BjuVB04G35640	-2.29103	-	-	-	Q5XF51|3MMP_ARATH Metalloendoproteinase 3-MMP OS=Arabidopsis thaliana OX=3702 GN=3MMP PE=1 SV=1 PF00413:Matrixin|PF01471:Putative peptidoglycan binding domain	PG_binding_1
BjuVA03G03850	1.10828	-	-	-	Q9LDZ0|HSP7J_ARATH Heat shock 70 kDa protein 10, mitochondrial OS=Arabidopsis thaliana OX=3702 GN=HSP70-10 PE=1 SV=1 PF00012:Hsp70 protein	HSP70
BjuVB03G13350	1.22946	-	-	-	Q70E96|AL3F1_ARATH Aldehyde dehydrogenase family 3 member F1 OS=Arabidopsis thaliana OX=3702 GN=ALDH3F1 PE=2 SV=2 PF00171:Aldehyde dehydrogenase family	Aldedh
BjuVB06G03970	-4.12692	-	-2.52054	-	PF14365:Neprosin activation peptide|PF03080:Neprosin	-
BjuVB05G02560	-1.73001	-	-	-	Q84JK2|FD_ARATH Protein FD OS=Arabidopsis thaliana OX=3702 GN=FD PE=1 SV=1 -	-
BjuVB03G36100	2.05317	2.02486	-	-	Q7YR70|AAMP_CANLF Angio-associated migratory cell protein OS=Canis lupus familiaris OX=9615 GN=AAMP PE=3 SV=1 PF00400:WD domain, G-beta repeat	WD40
BjuVB02G73680	-1.27176	1.14724	1.68663	-	Q38871|CDPK5_ARATH Calcium-dependent protein kinase 5 OS=Arabidopsis thaliana OX=3702 GN=CPK5 PE=2 SV=1 PF13499:EF-hand domain pair|PF00069:Protein kinase domain	Pkinase
BjuVA09G55810	1.24115	-	-	-	Q8VYJ7|CLPB4_ARATH Chaperone protein ClpB4, mitochondrial OS=Arabidopsis thaliana OX=3702 GN=CLPB4 PE=2 SV=1 PF07724:AAA domain (Cdc48 subfamily)|PF02861:Clp amino terminal domain, pathogenicity island component|PF00004:ATPase family associated with various cellular activities (AAA)|PF17871:AAA lid domain|PF10431:C-terminal, D2-small domain, of ClpB protein	AAA
BjuVB05G10500	-1.18874	-	-	-	Q9SZ11|GPDL3_ARATH Glycerophosphodiester phosphodiesterase GDPDL3 OS=Arabidopsis thaliana OX=3702 GN=GDPDL3 PE=2 SV=3 PF03009:Glycerophosphoryl diester phosphodiesterase family	-
BjuVB03G11070	1.84582	-	-	-	-	-
BjuVB02G74110	-1.18556	-	-	-	-	-
BjuVB05G17040	-1.12235	-	-	-	-	-
BjuVA06G10050	1.14048	-	-	-	Q93VT9|RL101_ARATH 60S ribosomal protein L10-1 OS=Arabidopsis thaliana OX=3702 GN=RPL10A PE=1 SV=1 PF00252:Ribosomal protein L16p/L10e	-
BjuVA08G25420	-1.00177	-	-	1.41808	Q9ASQ6|Y1972_ARATH Probable LRR receptor-like serine/threonine-protein kinase At1g29720 OS=Arabidopsis thaliana OX=3702 GN=RFK1 PE=2 SV=3 PF00069:Protein kinase domain|PF11721:Malectin domain	Pkinase
BjuVB06G42560	-1.02665	-	-	-	Q8H1E4|RAP24_ARATH Ethylene-responsive transcription factor RAP2-4 OS=Arabidopsis thaliana OX=3702 GN=RAP2-4 PE=1 SV=1 PF00847:AP2 domain	AP2
BjuVA06G44230	1.32432	-	2.0318	-	P46601|HAT2_ARATH Homeobox-leucine zipper protein HAT2 OS=Arabidopsis thaliana OX=3702 GN=HAT2 PE=1 SV=2 PF04618:HD-ZIP protein N terminus|PF00046:Homeodomain|PF02183:Homeobox associated leucine zipper	HD-ZIP_N
BjuVB02G36020	1.26222	-	-2.24758	-2.03852	Q94AY1|NADB_ARATH L-aspartate oxidase, chloroplastic OS=Arabidopsis thaliana OX=3702 GN=AO PE=1 SV=1 PF00890:FAD binding domain|PF02910:Fumarate reductase flavoprotein C-term	-
BjuVB02G38890	-1.22189	-	-	-	PF05910:Plant protein of unknown function (DUF868)	-
BjuVA10G27060	-1.23524	-	-	-	PF05910:Plant protein of unknown function (DUF868)	-
BjuVA08G23390	1.11789	1.21516	-	1.44219	Q8GUM2|HSP7I_ARATH Heat shock 70 kDa protein 9, mitochondrial OS=Arabidopsis thaliana OX=3702 GN=HSP70-9 PE=1 SV=1 PF00012:Hsp70 protein	HSP70
BjuVB04G47630	1.12946	-	-	-	Q43292|RL372_ARATH 60S ribosomal protein L37-2 OS=Arabidopsis thaliana OX=3702 GN=RPL37B PE=3 SV=2 -	-
BjuVB01G05820	4.10509	-	4.27574	-	Q42642|NLTPB_BRAOT Non-specific lipid-transfer protein B OS=Brassica oleracea var. italica OX=36774 GN=WAX9B PE=3 SV=1 PF00234:Protease inhibitor/seed storage/LTP family	-
BjuVB03G11660	1.75992	-	-	-	Q944H5|MTM1_ARATH Mitochondrial carrier protein MTM1 OS=Arabidopsis thaliana OX=3702 GN=MTM1 PE=2 SV=1 PF00153:Mitochondrial carrier protein	Mito_carr
BjuVA09G21880	1.37532	-	-	-	P42795|RL111_ARATH 60S ribosomal protein L11-1 OS=Arabidopsis thaliana OX=3702 GN=RPL11A PE=2 SV=2 PF00673:ribosomal L5P family C-terminus|PF00281:Ribosomal protein L5	-
BjuVA08G06490	1.0338	-	-1.18362	-	O23254|GLYC4_ARATH Serine hydroxymethyltransferase 4 OS=Arabidopsis thaliana OX=3702 GN=SHM4 PE=1 SV=1 PF00464:Serine hydroxymethyltransferase	SHMT
BjuVB04G17120	-2.95983	-	-	-	Q9FIH9|CML37_ARATH Calcium-binding protein CML37 OS=Arabidopsis thaliana OX=3702 GN=CML37 PE=1 SV=1 PF13833:EF-hand domain pair|PF13499:EF-hand domain pair	-
BjuVA10G00320	-2.8515	-	-	-	Q9LMM1|C86A4_ARATH Cytochrome P450 86A4 OS=Arabidopsis thaliana OX=3702 GN=CYP86A4 PE=1 SV=1 PF00067:Cytochrome P450	p450
BjuVA08G13770	-1.59581	-	-	-	O49726|PUP21_ARATH Purine permease 21 OS=Arabidopsis thaliana OX=3702 GN=PUP21 PE=2 SV=2 PF16913:Purine nucleobase transmembrane transport	-
BjuVA05G40210	-1.1389	-	1.84299	-	P42818|KPK1_ARATH Serine/threonine-protein kinase AtPK1/AtPK6 OS=Arabidopsis thaliana OX=3702 GN=ATPK1 PE=1 SV=1 PF00069:Protein kinase domain	Pkinase
BjuVB04G25630	-1.48118	-	1.35105	1.46663	Q9ZWM9|RAV1_ARATH AP2/ERF and B3 domain-containing transcription factor RAV1 OS=Arabidopsis thaliana OX=3702 GN=RAV1 PE=1 SV=1 PF00847:AP2 domain|PF02362:B3 DNA binding domain	B3
BjuVB06G20970	-1.62595	-	1.63961	-1.79432	Q9ZT94|POLR2_ARATH Retrovirus-related Pol polyprotein from transposon RE2 OS=Arabidopsis thaliana OX=3702 GN=RE2 PE=4 SV=1 PF14244:gag-polypeptide of LTR copia-type|PF14223:gag-polypeptide of LTR copia-type	-
BjuVB05G12480	-3.0834	-	-	-2.70641	Q9SB52|PUMP4_ARATH Mitochondrial uncoupling protein 4 OS=Arabidopsis thaliana OX=3702 GN=PUMP4 PE=2 SV=1 PF00153:Mitochondrial carrier protein	Mito_carr
BjuVA02G00210	-1.50171	-	-	-	Q9M020|LRK63_ARATH Lectin-domain containing receptor kinase VI.3 OS=Arabidopsis thaliana OX=3702 GN=LECRK63 PE=2 SV=1 PF00069:Protein kinase domain|PF00139:Legume lectin domain	Pkinase
BjuVA01G11490	-1.37286	-	-	-	-	-
BjuVB02G69020	1.25212	-	-	-	Q9T043|RL142_ARATH 60S ribosomal protein L14-2 OS=Arabidopsis thaliana OX=3702 GN=RPL14B PE=1 SV=1 PF01929:Ribosomal protein L14	-
BjuVB06G12290	-1.46936	-	-1.97486	-2.53183	PF00564:PB1 domain	-
BjuVB06G06260	1.10404	-1.20705	-1.70777	-2.80693	P10896|RCA_ARATH Ribulose bisphosphate carboxylase/oxygenase activase, chloroplastic OS=Arabidopsis thaliana OX=3702 GN=RCA PE=1 SV=2 PF00004:ATPase family associated with various cellular activities (AAA)	AAA
BjuVA01G23960	-1.40972	-	-	-	Q9SCZ4|FERON_ARATH Receptor-like protein kinase FERONIA OS=Arabidopsis thaliana OX=3702 GN=FER PE=1 SV=1 PF07714:Protein tyrosine and serine/threonine kinase|PF12819:Malectin-like domain	Pkinase_Tyr
BjuVB04G21800	-1.57759	-	-1.81767	-2.52166	-	-
BjuVA01G40800	-1.76426	-	-	-	P0C1S9|DGLB_RAT Diacylglycerol lipase-beta OS=Rattus norvegicus OX=10116 GN=Daglb PE=1 SV=1 PF03893:Lipase 3 N-terminal region|PF01764:Lipase (class 3)	Lipase_3
BjuVA03G33510	1.39416	-	-	-	P42791|RL182_ARATH 60S ribosomal protein L18-2 OS=Arabidopsis thaliana OX=3702 GN=RPL18B PE=1 SV=2 PF17135:Ribosomal protein 60S L18 and 50S L18e	-
BjuVB03G06880	-2.00278	-	-	-	-	-
BjuVB04G02060	-1.32064	-	-	-	Q24JK1|MYB96_ARATH Transcription factor MYB96 OS=Arabidopsis thaliana OX=3702 GN=MYB96 PE=2 SV=1 PF00249:Myb-like DNA-binding domain	Myb_DNA-binding
BjuVB05G21880	-1.6471	-	1.13656	-	Q9LFL0|CSLD2_ARATH Cellulose synthase-like protein D2 OS=Arabidopsis thaliana OX=3702 GN=CSLD2 PE=3 SV=1 PF03552:Cellulose synthase|PF14570:RING/Ubox like zinc-binding domain	-
BjuVA02G11850	2.97862	-	2.92047	-	Q9LLR7|NLTP3_ARATH Non-specific lipid-transfer protein 3 OS=Arabidopsis thaliana OX=3702 GN=LTP3 PE=3 SV=1 PF00234:Protease inhibitor/seed storage/LTP family	-
BjuVB07G21580	1.34707	-	-	-	O04658|NOP5A_ARATH Probable nucleolar protein 5-1 OS=Arabidopsis thaliana OX=3702 GN=NOP5-1 PE=1 SV=2 PF08156:NOP5NT (NUC127) domain|PF01798:snoRNA binding domain, fibrillarin	-
BjuVA04G02620	2.22025	-	-	-	Q9UT32|RL1DB_SCHPO Putative ribosome biogenesis protein C8F11.04 OS=Schizosaccharomyces pombe (strain 972 / ATCC 24843) OX=284812 GN=SPAC8F11.04 PE=3 SV=1 PF00687:Ribosomal protein L1p/L10e family	-
BjuVB02G68630	-7.37537	-	-	-	Q9STQ3|AGP13_ARATH Arabinogalactan protein 13 OS=Arabidopsis thaliana OX=3702 GN=AGP13 PE=1 SV=1 -	-
BjuVB04G53670	3.47643	3.36053	4.74017	7.2767	Q8VYX0|ILL6_ARATH IAA-amino acid hydrolase ILR1-like 6 OS=Arabidopsis thaliana OX=3702 GN=ILL6 PE=1 SV=2 PF01546:Peptidase family M20/M25/M40	Peptidase_M20
BjuVB03G22750	-1.06239	1.17294	1.06306	1.17092	Q94BT2|AIR12_ARATH Auxin-induced in root cultures protein 12 OS=Arabidopsis thaliana OX=3702 GN=AIR12 PE=1 SV=3 PF04526:Protein of unknown function (DUF568)	-
BjuVB06G20800	1.29274	1.11523	-	-	Q9SKC1|U74C1_ARATH UDP-glycosyltransferase 74C1 OS=Arabidopsis thaliana OX=3702 GN=UGT74C1 PE=2 SV=1 PF00201:UDP-glucoronosyl and UDP-glucosyl transferase	UDPGT
BjuVB03G13870	2.17339	-	-	-	Q42381|HLS1_ARATH Probable N-acetyltransferase HLS1 OS=Arabidopsis thaliana OX=3702 GN=HLS1 PE=1 SV=1 PF00583:Acetyltransferase (GNAT) family	Acetyltransf_1
BjuVB02G02150	-2.81504	-	-	-1.15756	-	-
BjuVB01G42300	1.2499	-	-	-	F4J8K6|RRP5_ARATH rRNA biogenesis protein RRP5 OS=Arabidopsis thaliana OX=3702 GN=RRP5 PE=2 SV=2 PF00575:S1 RNA binding domain|PF05843:Suppressor of forked protein (Suf)	S1
BjuVB03G15610	3.9757	-	-	-	-	-
BjuVB08G04700	1.26877	-	1.07915	-	PF06813:Nodulin-like	-
BjuVA03G12990	-1.38134	-1.14162	2.07148	-	Q9SCV8|BGAL4_ARATH Beta-galactosidase 4 OS=Arabidopsis thaliana OX=3702 GN=BGAL4 PE=1 SV=1 PF17834:Beta-sandwich domain in beta galactosidase|PF01301:Glycosyl hydrolases family 35	-
BjuVB06G17150	1.00167	-	-	-	Q9SLF7|RLA22_ARATH 60S acidic ribosomal protein P2-2 OS=Arabidopsis thaliana OX=3702 GN=RPP2B PE=1 SV=1 PF00428:60s Acidic ribosomal protein	-
BjuVB04G47150	3.14417	-	4.67618	5.70083	O04373|ILL4_ARATH IAA-amino acid hydrolase ILR1-like 4 OS=Arabidopsis thaliana OX=3702 GN=ILL4 PE=1 SV=2 PF01546:Peptidase family M20/M25/M40|PF07687:Peptidase dimerisation domain	Peptidase_M20
BjuVB05G10010	-1.43261	-	-	-	O81833|SD11_ARATH G-type lectin S-receptor-like serine/threonine-protein kinase SD1-1 OS=Arabidopsis thaliana OX=3702 GN=SD11 PE=1 SV=1 PF00954:S-locus glycoprotein domain|PF01453:D-mannose binding lectin|PF07714:Protein tyrosine and serine/threonine kinase|PF11883:Domain of unknown function (DUF3403)|PF08276:PAN-like domain	Pkinase_Tyr
BjuVA08G06800	-1.87033	-	1.14109	-	Q6IM91|DVL10_ARATH Small polypeptide DEVIL 10 OS=Arabidopsis thaliana OX=3702 GN=DVL10 PE=3 SV=1 PF08137:DVL family	-
BjuVA09G09620	-1.22176	-	-	-1.67172	P29162|ASOL_TOBAC L-ascorbate oxidase homolog OS=Nicotiana tabacum OX=4097 PE=2 SV=1 PF00394:Multicopper oxidase|PF07732:Multicopper oxidase|PF07731:Multicopper oxidase	-
BjuVA07G10990	-1.42915	-	-	-	Q9C7N2|CAD1_ARATH MACPF domain-containing protein CAD1 OS=Arabidopsis thaliana OX=3702 GN=CAD1 PE=2 SV=1 PF01823:MAC/Perforin domain	-
BjuVB08G21560	-1.37789	-	-	-	Q9XEE6|C3H29_ARATH Zinc finger CCCH domain-containing protein 29 OS=Arabidopsis thaliana OX=3702 GN=At2g40140 PE=1 SV=1 PF13637:Ankyrin repeats (many copies)	-
BjuVA03G56300	1.04645	-	-	1.8132	Q9T076|ENL2_ARATH Early nodulin-like protein 2 OS=Arabidopsis thaliana OX=3702 GN=At4g27520 PE=1 SV=1 PF02298:Plastocyanin-like domain	Cu_bind_like
BjuVB06G54330	-1.12349	-	-	-	Q9LYT5|PME35_ARATH Probable pectinesterase/pectinesterase inhibitor 35 OS=Arabidopsis thaliana OX=3702 GN=PME35 PE=2 SV=1 PF04043:Plant invertase/pectin methylesterase inhibitor|PF01095:Pectinesterase	-
BjuVB03G08740	-2.03041	-	1.12121	-	Q9LMN7|WAK5_ARATH Wall-associated receptor kinase 5 OS=Arabidopsis thaliana OX=3702 GN=WAK5 PE=2 SV=1 PF13947:Wall-associated receptor kinase galacturonan-binding|PF07645:Calcium-binding EGF domain|PF07714:Protein tyrosine and serine/threonine kinase	Pkinase_Tyr
BjuVB05G44460	-1.32936	-	-	-1.9692	Q9SNB8|SCL30_ARATH Scarecrow-like protein 30 OS=Arabidopsis thaliana OX=3702 GN=SCL30 PE=1 SV=1 PF03514:GRAS domain family	GRAS
BjuVA05G15780	1.14844	-	-4.39578	-3.23231	F4K5X6|RVE2_ARATH Protein REVEILLE 2 OS=Arabidopsis thaliana OX=3702 GN=RVE2 PE=1 SV=1 PF00249:Myb-like DNA-binding domain	Myb_DNA-binding
BjuVB05G05970	-1.25629	-	-	-	-	-
BjuVB01G42530	-1.1258	-	-	-	Q93W32|FLA18_ARATH Fasciclin-like arabinogalactan protein 18 OS=Arabidopsis thaliana OX=3702 GN=FLA18 PE=2 SV=1 PF02469:Fasciclin domain	-
BjuVB04G04670	-1.19142	-	1.15664	-	Q94CI6|EDL18_ARATH Sugar transporter ERD6-like 18 OS=Arabidopsis thaliana OX=3702 GN=SFP2 PE=2 SV=1 PF00083:Sugar (and other) transporter	Sugar_tr
BjuVB08G35930	1.26662	-	-	-	Q8AVP1|RPF1_XENLA Ribosome production factor 1 OS=Xenopus laevis OX=8355 GN=rpf1 PE=2 SV=1 PF04427:Brix domain	-
BjuVB08G39000	1.17102	-	-2.07981	-	P92979|APR1_ARATH 5'-adenylylsulfate reductase 1, chloroplastic OS=Arabidopsis thaliana OX=3702 GN=APR1 PE=1 SV=2 PF00085:Thioredoxin|PF01507:Phosphoadenosine phosphosulfate reductase family	-
BjuVA09G04810	1.24583	-	-	-	O04658|NOP5A_ARATH Probable nucleolar protein 5-1 OS=Arabidopsis thaliana OX=3702 GN=NOP5-1 PE=1 SV=2 PF08156:NOP5NT (NUC127) domain|PF01798:snoRNA binding domain, fibrillarin	-
BjuVA07G25700	-1.03448	-	-	-	Q9C6W4|BGA15_ARATH Beta-galactosidase 15 OS=Arabidopsis thaliana OX=3702 GN=BGAL15 PE=2 SV=1 PF02140:Galactose binding lectin domain|PF17834:Beta-sandwich domain in beta galactosidase|PF00504:Chlorophyll A-B binding protein|PF01301:Glycosyl hydrolases family 35	-
BjuVB08G08140	1.58655	-2.07692	-1.83051	-4.64685	-	-
BjuVB02G28150	-1.46222	-	-	-	Q39065|COPT1_ARATH Copper transporter 1 OS=Arabidopsis thaliana OX=3702 GN=COPT1 PE=2 SV=2 PF04145:Ctr copper transporter family	-
BjuVA09G23270	1.01983	-	-	-	P60040|RL72_ARATH 60S ribosomal protein L7-2 OS=Arabidopsis thaliana OX=3702 GN=RPL7B PE=1 SV=1 PF00327:Ribosomal protein L30p/L7e|PF08079:Ribosomal L30 N-terminal domain	-
BjuVA01G28430	1.00995	-	-	-	O04151|CALR1_ARATH Calreticulin-1 OS=Arabidopsis thaliana OX=3702 GN=CRT1 PE=1 SV=1 PF00262:Calreticulin family	-
BjuVB05G03940	-1.20067	-	-	-	Q8L7W8|FUCO2_ARATH Alpha-L-fucosidase 2 OS=Arabidopsis thaliana OX=3702 GN=FUC95A PE=1 SV=1 PF14498:Glycosyl hydrolase family 65, N-terminal domain	-
BjuVA09G07730	-4.77397	-	-	-	PF03108:MuDR family transposase|PF04434:SWIM zinc finger|PF10551:MULE transposase domain	MuDR
BjuVA03G26650	4.56924	-	-	-	O80982|HSFA2_ARATH Heat stress transcription factor A-2 OS=Arabidopsis thaliana OX=3702 GN=HSFA2 PE=1 SV=1 PF00447:HSF-type DNA-binding	HSF_DNA-bind
BjuVA06G14130	1.39377	1.87773	1.13922	-	Q9FZ80|SOT17_ARATH Cytosolic sulfotransferase 17 OS=Arabidopsis thaliana OX=3702 GN=SOT17 PE=1 SV=1 PF00685:Sulfotransferase domain	Sulfotransfer_1
BjuVA01G01190	-1.01716	-	-	-	Q9T074|PCKA1_ARATH Phosphoenolpyruvate carboxykinase (ATP) 1 OS=Arabidopsis thaliana OX=3702 GN=PCK1 PE=1 SV=1 PF01293:Phosphoenolpyruvate carboxykinase	-
BjuVB02G49270	1.7561	-	-	-	P17094|RL31_ARATH 60S ribosomal protein L3-1 OS=Arabidopsis thaliana OX=3702 GN=ARP1 PE=1 SV=5 PF00297:Ribosomal protein L3	-
BjuVA03G09220	-1.24499	-	-	-	P24805|TSJT1_TOBAC Stem-specific protein TSJT1 OS=Nicotiana tabacum OX=4097 GN=TSJT1 PE=2 SV=1 PF12481:Aluminium induced protein	-
BjuVB03G09910	-2.45318	1.38832	1.87937	-	Q9C5T4|WRK18_ARATH WRKY transcription factor 18 OS=Arabidopsis thaliana OX=3702 GN=WRKY18 PE=1 SV=2 PF03106:WRKY DNA -binding domain	WRKY
BjuVB06G08440	1.0625	-	-1.74076	-2.4185	P35510|PAL1_ARATH Phenylalanine ammonia-lyase 1 OS=Arabidopsis thaliana OX=3702 GN=PAL1 PE=1 SV=3 PF00221:Aromatic amino acid lyase	-
BjuVA05G32100	2.95633	-	-	-	Q9SCX8|PPA17_ARATH Purple acid phosphatase 17 OS=Arabidopsis thaliana OX=3702 GN=PAP17 PE=2 SV=1 PF00149:Calcineurin-like phosphoesterase	Metallophos
BjuVB05G01280	1.87348	-	1.65836	-	Q9SZE8|LBD39_ARATH LOB domain-containing protein 39 OS=Arabidopsis thaliana OX=3702 GN=LBD39 PE=2 SV=1 PF03195:Lateral organ boundaries (LOB) domain	-
BjuVA02G44770	-1.23477	1.31192	-	1.69047	Q9FPT1|UBP12_ARATH Ubiquitin C-terminal hydrolase 12 OS=Arabidopsis thaliana OX=3702 GN=UBP12 PE=1 SV=2 PF00917:MATH domain	MATH
BjuVA05G02260	1.44004	-	-	-	P0CD61|GPT_DICDI UDP-N-acetylglucosamine--dolichyl-phosphate N-acetylglucosaminephosphotransferase OS=Dictyostelium discoideum OX=44689 GN=alg7 PE=3 SV=1 PF00953:Glycosyl transferase family 4	Glycos_transf_4
BjuVB03G34980	-1.22086	-1.24639	-2.29503	-	Q9C6B9|PEAM3_ARATH Phosphoethanolamine N-methyltransferase 3 OS=Arabidopsis thaliana OX=3702 GN=NMT3 PE=2 SV=2 PF13847:Methyltransferase domain|PF08241:Methyltransferase domain	Methyltransf_11
BjuVA10G11490	-1.55319	-	-	-	Q9ZUZ3|SAU32_ARATH Auxin-responsive protein SAUR32 OS=Arabidopsis thaliana OX=3702 GN=SAUR32 PE=2 SV=1 PF02519:Auxin responsive protein	Auxin_inducible
BjuVA10G29700	-1.184	-	-	-	Q9LY23|IPMKA_ARATH Inositol polyphosphate multikinase alpha OS=Arabidopsis thaliana OX=3702 GN=IPK2a PE=1 SV=1 PF03770:Inositol polyphosphate kinase	-
BjuVB02G51070	-1.03151	-	-	-	Q84M93|MPK17_ARATH Mitogen-activated protein kinase 17 OS=Arabidopsis thaliana OX=3702 GN=MPK17 PE=2 SV=1 PF00069:Protein kinase domain	Pkinase
BjuVA10G17290	1.25764	-	-	-	Q00332|RS15A_BRANA 40S ribosomal protein S15a OS=Brassica napus OX=3708 GN=RPS15A PE=2 SV=3 PF00410:Ribosomal protein S8	-
BjuVB04G49050	-2.31306	-	-	-	Q9LZD8|U89A2_ARATH UDP-glycosyltransferase 89A2 OS=Arabidopsis thaliana OX=3702 GN=UGT89A2 PE=2 SV=1 PF00201:UDP-glucoronosyl and UDP-glucosyl transferase	UDPGT
BjuVB06G14400	-4.24537	-	-	1.92519	-	-
BjuVB02G10800	-1.07755	-	-	-	Q8VYV9|APF1_ARATH Aspartyl protease family protein 1 OS=Arabidopsis thaliana OX=3702 GN=APF1 PE=2 SV=1 PF14541:Xylanase inhibitor C-terminal|PF14543:Xylanase inhibitor N-terminal	-
BjuVB03G08730	-1.0619	-	1.09688	1.22708	Q9LMN7|WAK5_ARATH Wall-associated receptor kinase 5 OS=Arabidopsis thaliana OX=3702 GN=WAK5 PE=2 SV=1 PF13947:Wall-associated receptor kinase galacturonan-binding|PF07645:Calcium-binding EGF domain|PF07714:Protein tyrosine and serine/threonine kinase	Pkinase_Tyr
BjuVA05G37710	-1.3325	-	-	-	Q9ZSD4|SY121_ARATH Syntaxin-121 OS=Arabidopsis thaliana OX=3702 GN=SYP121 PE=1 SV=1 PF00804:Syntaxin|PF05739:SNARE domain	SNARE
BjuVA02G07480	2.44016	-	-	-	F4KGY6|RVE1_ARATH Protein REVEILLE 1 OS=Arabidopsis thaliana OX=3702 GN=RVE1 PE=1 SV=1 PF00249:Myb-like DNA-binding domain	Myb_DNA-binding
BjuVB03G10550	-1.1055	-	-2.59418	-1.22277	Q949Q7|SCP29_ARATH Serine carboxypeptidase-like 29 OS=Arabidopsis thaliana OX=3702 GN=SCPL29 PE=2 SV=1 PF00450:Serine carboxypeptidase	Peptidase_S10
BjuVA10G02610	3.1796	-	-	-	Q5XEP9|KCS2_ARATH 3-ketoacyl-CoA synthase 2 OS=Arabidopsis thaliana OX=3702 GN=KCS2 PE=2 SV=2 PF08392:FAE1/Type III polyketide synthase-like protein|PF08541:3-Oxoacyl-[acyl-carrier-protein (ACP)] synthase III C terminal	-
BjuV_Contig00937G00180	-1.41037	-	1.47084	-	F4HXL0|PLIP2_ARATH Phospholipase A1 PLIP2, chloroplastic OS=Arabidopsis thaliana OX=3702 GN=PLIP2 PE=1 SV=1 PF01764:Lipase (class 3)	Lipase_3
BjuVB08G09670	1.1679	-	-	-	P42798|R15A1_ARATH 40S ribosomal protein S15a-1 OS=Arabidopsis thaliana OX=3702 GN=RPS15AA PE=2 SV=2 PF00410:Ribosomal protein S8	-
BjuVA08G28720	-1.64927	1.92769	2.49778	2.54725	Q9SK96|PTR10_ARATH Protein NRT1/ PTR FAMILY 5.16 OS=Arabidopsis thaliana OX=3702 GN=NPF5.16 PE=2 SV=1 PF00854:POT family	-
BjuVB04G15980	-1.32743	-	1.69305	1.2669	Q9ZVM9|Y1461_ARATH Probable serine/threonine-protein kinase At1g54610 OS=Arabidopsis thaliana OX=3702 GN=At1g54610 PE=1 SV=1 PF00069:Protein kinase domain	Pkinase
BjuVA08G12050	1.50046	1.24039	-	2.74371	P25853|BAM5_ARATH Beta-amylase 5 OS=Arabidopsis thaliana OX=3702 GN=BAM5 PE=2 SV=1 PF01373:Glycosyl hydrolase family 14	-
BjuVB05G26100	1.07746	-	-	-	Q9LDZ0|HSP7J_ARATH Heat shock 70 kDa protein 10, mitochondrial OS=Arabidopsis thaliana OX=3702 GN=HSP70-10 PE=1 SV=1 PF00012:Hsp70 protein	HSP70
BjuVA08G29140	1.14475	1.10484	-	1.42275	Q9XI01|PDI11_ARATH Protein disulfide isomerase-like 1-1 OS=Arabidopsis thaliana OX=3702 GN=PDIL1-1 PE=1 SV=1 PF13848:Thioredoxin-like domain|PF00085:Thioredoxin	-
BjuVA07G21480	-1.10664	-	-	-	Q8RXN8|NRP_ARATH DCD domain-containing protein NRP OS=Arabidopsis thaliana OX=3702 GN=NRP PE=1 SV=1 PF10539:Development and cell death domain	-
BjuV_Contig00683G00170	1.53511	-	-	-	PF05514:HR-like lesion-inducing	-
BjuVB04G16300	-1.02842	-	-	-	PF12552:Protein of unknown function (DUF3741)|PF14309:Domain of unknown function (DUF4378)	-
BjuV_Contig00909G00060	-1.06867	-	-	1.25865	Q9MAM1|CIPK9_ARATH CBL-interacting serine/threonine-protein kinase 9 OS=Arabidopsis thaliana OX=3702 GN=CIPK9 PE=1 SV=2 PF03822:NAF domain|PF00069:Protein kinase domain	Pkinase
BjuVA03G39160	-1.85164	-	-	-	O04133|SRC2_SOYBN Protein SRC2 OS=Glycine max OX=3847 GN=SRC2 PE=2 SV=1 -	-
BjuVB06G13680	-1.4049	-	-	-	Q9FLF4|PUB27_ARATH U-box domain-containing protein 27 OS=Arabidopsis thaliana OX=3702 GN=PUB27 PE=2 SV=1 PF04564:U-box domain	U-box
BjuVB07G17810	-1.30948	-	-	-	Q9FT92|Y5843_ARATH Uncharacterized protein At5g08430 OS=Arabidopsis thaliana OX=3702 GN=At5g08430 PE=1 SV=2 PF02201:SWIB/MDM2 domain	-
BjuVB07G03240	-1.22807	-	-	-1.18619	Q9SR87|LRK61_ARATH Probable L-type lectin-domain containing receptor kinase VI.1 OS=Arabidopsis thaliana OX=3702 GN=LECRK61 PE=2 SV=1 PF00139:Legume lectin domain|PF00069:Protein kinase domain	Pkinase
BjuVB04G41230	-2.18441	-	-	-2.16604	Q0MW30|NEU1B_MOUSE E3 ubiquitin-protein ligase NEURL1B OS=Mus musculus OX=10090 GN=Neurl1b PE=1 SV=1 PF13920:Zinc finger, C3HC4 type (RING finger)	-
BjuVB08G09690	-2.87817	-	1.56621	-	Q42410|ZAT12_ARATH Zinc finger protein ZAT12 OS=Arabidopsis thaliana OX=3702 GN=ZAT12 PE=2 SV=1 PF13912:C2H2-type zinc finger	-
BjuVA07G37460	1.2857	-	-	-	Q9S7Z8|PIN3_ARATH Auxin efflux carrier component 3 OS=Arabidopsis thaliana OX=3702 GN=PIN3 PE=1 SV=1 PF03547:Membrane transport protein	-
BjuVA03G23240	1.59237	-	-1.56207	-	Q9SIN5|CR15B_ARATH Protein COLD-REGULATED 15B, chloroplastic OS=Arabidopsis thaliana OX=3702 GN=COR15B PE=1 SV=1 -	-
BjuVB07G24970	-2.47027	-	-	-	Q5PNY6|PUB21_ARATH U-box domain-containing protein 21 OS=Arabidopsis thaliana OX=3702 GN=PUB21 PE=2 SV=1 -	-
BjuVB07G00790	-1.5061	-	2.11357	-	-	-
BjuVA03G03450	-1.7329	-	1.65877	-	Q9FTA2|TCP21_ARATH Transcription factor TCP21 OS=Arabidopsis thaliana OX=3702 GN=TCP21 PE=1 SV=1 PF03634:TCP family transcription factor	TCP
BjuVA08G29310	1.33228	-	-	-	Q9LPL4|SKP2A_ARATH F-box protein SKP2A OS=Arabidopsis thaliana OX=3702 GN=SKP2A PE=1 SV=1 PF00646:F-box domain	F-box
BjuVA02G16400	1.72421	-	-	-	Q84JK8|MAKR6_ARATH Probable membrane-associated kinase regulator 6 OS=Arabidopsis thaliana OX=3702 GN=MAKR6 PE=2 SV=1 -	-
BjuVB01G07940	1.16714	-	-	-	E4MWF4|CSPL1_EUTHA CASP-like protein 2B1 OS=Eutrema halophilum OX=98038 PE=2 SV=1 PF04535:Domain of unknown function (DUF588)	-
BjuVB07G12600	-1.04865	-	-	-	Q9F234|AGL2_BACTQ Alpha-glucosidase 2 OS=Bacillus thermoamyloliquefaciens OX=1425 PE=3 SV=1 PF17137:Domain of unknown function (DUF5110)|PF01055:Glycosyl hydrolases family 31|PF13802:Galactose mutarotase-like	Glyco_hydro_31
BjuVB05G22850	-2.29149	-	-	-	-	-
BjuVB01G00710	1.45344	-	-	-	-	-
BjuVB06G29400	1.69173	-	1.44645	-	-	-
BjuVA09G16290	1.29663	-1.36873	-	-2.79421	PF02536:mTERF	-
BjuVB03G42510	-1.47303	-	-	-	PF04601:Domain of unknown function (DUF569)	-
BjuVB02G25190	1.21167	-	-1.05831	-	C0Z361|CPNB3_ARATH Chaperonin 60 subunit beta 3, chloroplastic OS=Arabidopsis thaliana OX=3702 GN=CPN60B3 PE=1 SV=1 PF00118:TCP-1/cpn60 chaperonin family	-
BjuVB06G21900	-1.3891	-	-	-	-	-
BjuVA02G24770	-1.23723	-	-	-	Q94AP3|WAT1_ARATH Protein WALLS ARE THIN 1 OS=Arabidopsis thaliana OX=3702 GN=WAT1 PE=1 SV=1 PF00892:EamA-like transporter family	DUF6
BjuVB03G55010	1.04514	-	-2.11403	-	Q9ZVX4|U90A1_ARATH UDP-glycosyltransferase 90A1 OS=Arabidopsis thaliana OX=3702 GN=UGT90A1 PE=2 SV=1 PF00201:UDP-glucoronosyl and UDP-glucosyl transferase	UDPGT
BjuVB03G08820	1.52455	-	-	-1.74333	Q9LPL4|SKP2A_ARATH F-box protein SKP2A OS=Arabidopsis thaliana OX=3702 GN=SKP2A PE=1 SV=1 PF00646:F-box domain	F-box
BjuVB01G25520	-1.09594	-	-	-	Q8GYB4|CAAT3_ARATH Cationic amino acid transporter 3, mitochondrial OS=Arabidopsis thaliana OX=3702 GN=CAT3 PE=2 SV=1 PF13520:Amino acid permease|PF13906:C-terminus of AA_permease	-
BjuVB05G08980	-1.27624	-	-	-	Q93YW5|P2C58_ARATH Probable protein phosphatase 2C 58 OS=Arabidopsis thaliana OX=3702 GN=At4g28400 PE=2 SV=1 PF00481:Protein phosphatase 2C	PP2C
BjuVA01G17300	1.9328	1.87646	-	-	Q93ZG9|FKB53_ARATH Peptidyl-prolyl cis-trans isomerase FKBP53 OS=Arabidopsis thaliana OX=3702 GN=FKBP53 PE=1 SV=1 PF17800:Nucleoplasmin-like domain|PF00254:FKBP-type peptidyl-prolyl cis-trans isomerase	FKBP_C
BjuVB08G51920	-1.72523	-	-	-	-	-
BjuVA03G51740	-2.03754	-	-	-	-	-
BjuVB06G24280	-1.44548	-	-	-	Q9M290|NAC61_ARATH Putative NAC domain-containing protein 61 OS=Arabidopsis thaliana OX=3702 GN=NAC061 PE=3 SV=1 PF02365:No apical meristem (NAM) protein	NAM
BjuVA04G29580	-3.18384	-	-2.37581	-	Q8GW10|BAH1L_ARATH Probable E3 ubiquitin-protein ligase BAH1-like OS=Arabidopsis thaliana OX=3702 GN=RF178 PE=2 SV=1 PF00069:Protein kinase domain|PF13445:RING-type zinc-finger	Pkinase
BjuVA07G33210	-1.19424	-	-	-	Q9S972|SD16_ARATH Receptor-like serine/threonine-protein kinase SD1-6 OS=Arabidopsis thaliana OX=3702 GN=SD16 PE=1 SV=2 PF07714:Protein tyrosine and serine/threonine kinase|PF08276:PAN-like domain|PF12398:Receptor serine/threonine kinase|PF00954:S-locus glycoprotein domain|PF11883:Domain of unknown function (DUF3403)|PF01453:D-mannose binding lectin	Pkinase_Tyr
BjuVA06G30270	-1.1351	-	-1.04122	-	-	-
BjuVB03G44980	3.34241	6.0217	7.38668	7.38073	Q9C7S6|KTI2_ARATH Kunitz trypsin inhibitor 2 OS=Arabidopsis thaliana OX=3702 GN=KTI2 PE=1 SV=1 PF00197:Trypsin and protease inhibitor	-
BjuV_Contig00875G00110	1.06116	-	-	-	P35134|UBC11_ARATH Ubiquitin-conjugating enzyme E2 11 OS=Arabidopsis thaliana OX=3702 GN=UBC11 PE=1 SV=2 PF00179:Ubiquitin-conjugating enzyme	UQ_con
BjuVB08G30900	-1.04762	-	1.00319	1.75894	Q9XEA1|CSCL5_ARATH Protein OSCA1 OS=Arabidopsis thaliana OX=3702 GN=OSCA1 PE=1 SV=1 PF13967:Late exocytosis, associated with Golgi transport|PF02714:Calcium-dependent channel, 7TM region, putative phosphate|PF14703:Cytosolic domain of 10TM putative phosphate transporter	-
BjuVB03G15930	-1.1117	-	-	-	Q9C7N2|CAD1_ARATH MACPF domain-containing protein CAD1 OS=Arabidopsis thaliana OX=3702 GN=CAD1 PE=2 SV=1 PF01823:MAC/Perforin domain	-
BjuVB03G58280	1.0307	-	-	-	O82204|RL281_ARATH 60S ribosomal protein L28-1 OS=Arabidopsis thaliana OX=3702 GN=RPL28A PE=1 SV=1 PF01778:Ribosomal L28e protein family	-
BjuVA01G05150	-1.86422	-	-	-	O82645|IQM1_ARATH IQ domain-containing protein IQM1 OS=Arabidopsis thaliana OX=3702 GN=IQM1 PE=1 SV=1 -	-
BjuVA06G18840	1.73265	-	-	-	Q9FFQ7|FACT_ARATH Fatty alcohol:caffeoyl-CoA acyltransferase OS=Arabidopsis thaliana OX=3702 GN=FACT PE=2 SV=1 PF02458:Transferase family	-
BjuVA07G32150	-1.16045	1.3078	1.09807	-	Q9S7Y7|XYL1_ARATH Alpha-xylosidase 1 OS=Arabidopsis thaliana OX=3702 GN=XYL1 PE=1 SV=1 PF13802:Galactose mutarotase-like|PF01055:Glycosyl hydrolases family 31|PF16863:N-terminal barrel of NtMGAM and CtMGAM, maltase-glucoamylase	Glyco_hydro_31
BjuVA09G18100	-1.44523	-	1.47466	-	Q9QYJ3|DNJB1_MOUSE DnaJ homolog subfamily B member 1 OS=Mus musculus OX=10090 GN=Dnajb1 PE=1 SV=3 PF01556:DnaJ C terminal domain|PF00226:DnaJ domain	DnaJ_C
BjuVB02G49220	-1.3605	-	-	-	Q336N8|JM706_ORYSJ Lysine-specific demethylase JMJ706 OS=Oryza sativa subsp. japonica OX=39947 GN=JMJ706 PE=2 SV=1 PF02375:jmjN domain|PF02928:C5HC2 zinc finger|PF02373:JmjC domain, hydroxylase	JmjC
BjuVB05G10980	1.56589	-	-	-	Q9SZI6|GAT22_ARATH Putative GATA transcription factor 22 OS=Arabidopsis thaliana OX=3702 GN=GATA22 PE=1 SV=1 PF00320:GATA zinc finger	GATA
BjuVA03G50410	-1.20169	-	-	-1.38771	Q8RY74|PUP22_ARATH Probable purine permease 22 OS=Arabidopsis thaliana OX=3702 GN=PUP22 PE=2 SV=1 PF16913:Purine nucleobase transmembrane transport	-
BjuVA07G29350	-4.33098	-	-	-5.39319	Q9S7L5|ERF18_ARATH Ethylene-responsive transcription factor ERF018 OS=Arabidopsis thaliana OX=3702 GN=ERF018 PE=2 SV=1 PF00847:AP2 domain	AP2
BjuVA02G39620	-1.25414	-	-	-	Q9LI83|ALA10_ARATH Phospholipid-transporting ATPase 10 OS=Arabidopsis thaliana OX=3702 GN=ALA10 PE=3 SV=1 PF16212:Phospholipid-translocating P-type ATPase C-terminal|PF16209:Phospholipid-translocating ATPase N-terminal|PF13246:Cation transport ATPase (P-type)	-
BjuVA07G44390	-1.37165	-	-	-	Q9SAL0|RGLG4_ARATH E3 ubiquitin-protein ligase RGLG4 OS=Arabidopsis thaliana OX=3702 GN=RGLG4 PE=1 SV=1 PF13920:Zinc finger, C3HC4 type (RING finger)|PF07002:Copine	-
BjuVB02G68180	-1.88419	-	-	-	P93835|DRE1B_ARATH Dehydration-responsive element-binding protein 1B OS=Arabidopsis thaliana OX=3702 GN=DREB1B PE=1 SV=2 PF00847:AP2 domain	AP2
BjuVB02G38710	1.68263	-	-2.10535	-	O24646|HY5_ARATH Transcription factor HY5 OS=Arabidopsis thaliana OX=3702 GN=HY5 PE=1 SV=1 PF00170:bZIP transcription factor	bZIP_1
BjuVB08G40660	-1.12814	-	-	-2.14057	Q9SAR0|1A16_ARATH 1-aminocyclopropane-1-carboxylate synthase 6 OS=Arabidopsis thaliana OX=3702 GN=ACS6 PE=1 SV=2 PF00155:Aminotransferase class I and II	Aminotran_1_2
BjuVA09G35770	-1.66492	-	-	-	Q9SA88|BBE11_ARATH Berberine bridge enzyme-like 11 OS=Arabidopsis thaliana OX=3702 GN=At1g30730 PE=2 SV=1 PF08031:Berberine and berberine like|PF01565:FAD binding domain	FAD_binding_4
BjuVB04G33470	1.08463	-	-	-	Q8RWM6|P24D5_ARATH Transmembrane emp24 domain-containing protein p24delta5 OS=Arabidopsis thaliana OX=3702 GN=At1g21900 PE=1 SV=1 PF01105:emp24/gp25L/p24 family/GOLD	-
BjuVA06G37920	-1.82439	-	1.32298	-	-	-
BjuVB05G07410	-4.57785	-	3.0171	-	Q9M0D2|XTH18_ARATH Probable xyloglucan endotransglucosylase/hydrolase protein 18 OS=Arabidopsis thaliana OX=3702 GN=XTH18 PE=2 SV=1 PF00722:Glycosyl hydrolases family 16|PF06955:Xyloglucan endo-transglycosylase (XET) C-terminus	-
BjuVA05G28580	2.82821	-	-	-	Q9LTP5|GRP5_ARATH Glycine-rich protein 5 OS=Arabidopsis thaliana OX=3702 GN=GRP5 PE=2 SV=1 -	-
BjuVB06G00870	-1.17252	-	1.09392	-	Q8GYY5|RGAP3_ARATH Rho GTPase-activating protein 3 OS=Arabidopsis thaliana OX=3702 GN=ROPGAP3 PE=2 SV=1 PF00620:RhoGAP domain	RhoGAP
BjuVA03G35340	1.10233	-	-	-	Q9SF53|RL351_ARATH 60S ribosomal protein L35-1 OS=Arabidopsis thaliana OX=3702 GN=RPL35A PE=2 SV=1 PF00831:Ribosomal L29 protein	-
BjuVA06G16890	1.55123	-	-	-	O22227|MIZ1_ARATH Protein MIZU-KUSSEI 1 OS=Arabidopsis thaliana OX=3702 GN=MIZ1 PE=1 SV=1 PF04759:Protein of unknown function, DUF617	-
BjuVB01G43240	-1.5141	-	-	-2.78428	-	-
BjuVA06G10540	-1.23675	-	-	-	Q9LQV2|RDR1_ARATH RNA-dependent RNA polymerase 1 OS=Arabidopsis thaliana OX=3702 GN=RDR1 PE=2 SV=1 PF05183:RNA dependent RNA polymerase	-
BjuVA02G25580	-1.67739	-	-	-	PF14009:Domain of unknown function (DUF4228)	-
BjuVA04G13800	1.47787	-	-1.33231	-	Q9FND9|RFS5_ARATH Probable galactinol--sucrose galactosyltransferase 5 OS=Arabidopsis thaliana OX=3702 GN=RFS5 PE=1 SV=1 PF05691:Raffinose synthase or seed imbibition protein Sip1	-
BjuVA09G54290	-1.14975	-	-	-	Q3EAF9|P2C49_ARATH Probable protein phosphatase 2C 49 OS=Arabidopsis thaliana OX=3702 GN=At3g62260 PE=2 SV=1 PF00481:Protein phosphatase 2C	PP2C
BjuVB01G32770	1.03645	-	-3.62011	-3.92404	Q9LVF0|U84A2_ARATH UDP-glycosyltransferase 84A2 OS=Arabidopsis thaliana OX=3702 GN=UGT84A2 PE=1 SV=1 PF00201:UDP-glucoronosyl and UDP-glucosyl transferase	UDPGT
BjuVA05G05360	1.82157	-	-	-	Q9FVC8|DAPA2_ARATH 4-hydroxy-tetrahydrodipicolinate synthase 2, chloroplastic OS=Arabidopsis thaliana OX=3702 GN=DHDPS2 PE=1 SV=2 PF00701:Dihydrodipicolinate synthetase family	-
BjuVB05G19640	1.42996	1.8009	2.48945	2.4777	O23487|BH003_ARATH Transcription factor bHLH3 OS=Arabidopsis thaliana OX=3702 GN=BHLH3 PE=1 SV=1 PF00010:Helix-loop-helix DNA-binding domain|PF14215:bHLH-MYC and R2R3-MYB transcription factors N-terminal	HLH
BjuVB02G40080	1.09325	-	-	2.32669	PF00564:PB1 domain	-
BjuVB08G51870	1.11368	-	-	-	P49636|RL40_NICSY Ubiquitin-60S ribosomal protein L40 OS=Nicotiana sylvestris OX=4096 GN=UBICEP52-7 PE=2 SV=2 PF00240:Ubiquitin family|PF01020:Ribosomal L40e family	ubiquitin
BjuVB05G52940	1.40096	-	-	-	Q9VEJ2|NOP14_DROME Nucleolar protein 14 homolog OS=Drosophila melanogaster OX=7227 GN=l(3)07882 PE=2 SV=2 PF04147:Nop14-like family	-
BjuVA03G56040	1.03285	-	-	-	Q9T043|RL142_ARATH 60S ribosomal protein L14-2 OS=Arabidopsis thaliana OX=3702 GN=RPL14B PE=1 SV=1 PF01929:Ribosomal protein L14	-
BjuVB02G17230	1.04903	-	-	-1.30429	Q8VYJ7|CLPB4_ARATH Chaperone protein ClpB4, mitochondrial OS=Arabidopsis thaliana OX=3702 GN=CLPB4 PE=2 SV=1 PF07724:AAA domain (Cdc48 subfamily)|PF02861:Clp amino terminal domain, pathogenicity island component|PF00004:ATPase family associated with various cellular activities (AAA)|PF17871:AAA lid domain|PF10431:C-terminal, D2-small domain, of ClpB protein	AAA
BjuVB05G48830	-1.46013	-	-	-	-	-
BjuVA09G07070	-1.30776	1.7565	-	2.04288	Q9LKL2|APRR1_ARATH Two-component response regulator-like APRR1 OS=Arabidopsis thaliana OX=3702 GN=APRR1 PE=1 SV=1 PF00072:Response regulator receiver domain|PF06203:CCT motif	Response_reg
BjuVB08G57310	-1.94631	-	-	-1.86742	C7SFP6|ARGOS_BRARP Protein AUXIN-REGULATED GENE INVOLVED IN ORGAN SIZE OS=Brassica rapa subsp. pekinensis OX=51351 GN=ARGOS PE=2 SV=2 -	-
BjuVB04G10730	-1.2509	-	-	-	P0DKH6|RPS6R_ARATH Disease resistance protein RPS6 OS=Arabidopsis thaliana OX=3702 GN=RPS6 PE=1 SV=1 PF07725:Leucine Rich Repeat|PF00931:NB-ARC domain|PF01582:TIR domain	TIR
BjuVB08G13090	1.26064	-	-1.89263	-	Q9FN26|U79B6_ARATH UDP-glycosyltransferase 79B6 OS=Arabidopsis thaliana OX=3702 GN=UGT79B6 PE=2 SV=1 PF00201:UDP-glucoronosyl and UDP-glucosyl transferase	UDPGT
BjuVB07G07100	-1.37091	-	-	-	O80340|ERF78_ARATH Ethylene-responsive transcription factor 4 OS=Arabidopsis thaliana OX=3702 GN=ERF4 PE=1 SV=1 PF00847:AP2 domain	AP2
BjuVB05G45930	-1.21868	-	-	-	-	-
BjuVB03G17480	1.1692	1.26744	1.01195	2.47226	Q42565|ASB1_ARATH Anthranilate synthase beta subunit 1, chloroplastic OS=Arabidopsis thaliana OX=3702 GN=ASB1 PE=1 SV=1 PF00117:Glutamine amidotransferase class-I	GATase
BjuVA06G35660	-2.36512	-	-	-	Q9FID5|Y5393_ARATH Probable receptor-like protein kinase At5g39030 OS=Arabidopsis thaliana OX=3702 GN=At5g39030 PE=2 SV=1 PF07714:Protein tyrosine and serine/threonine kinase|PF12819:Malectin-like domain	Pkinase_Tyr
BjuVA01G23110	1.08783	-	-	-	P51419|RL273_ARATH 60S ribosomal protein L27-3 OS=Arabidopsis thaliana OX=3702 GN=RPL27C PE=2 SV=2 PF01777:Ribosomal L27e protein family	-
BjuVB01G29200	1.05389	-	-	-	Q9SZU7|KAI2_ARATH Probable esterase KAI2 OS=Arabidopsis thaliana OX=3702 GN=KAI2 PE=1 SV=1 PF12697:Alpha/beta hydrolase family	-
BjuVA08G01520	-1.63786	-	-	-	Q9C7X0|ADR2_ARATH Disease resistance protein ADR2 OS=Arabidopsis thaliana OX=3702 GN=ADR2 PE=2 SV=1 PF01582:TIR domain	TIR
BjuVA01G37080	1.12384	-	-	-	Q9C8F7|RL301_ARATH Putative 60S ribosomal protein L30-1 OS=Arabidopsis thaliana OX=3702 GN=RPL30A PE=3 SV=1 PF01248:Ribosomal protein L7Ae/L30e/S12e/Gadd45 family	-
BjuVA01G08920	-1.09336	-	1.37862	-	Q9M0G2|C3H49_ARATH Zinc finger CCCH domain-containing protein 49 OS=Arabidopsis thaliana OX=3702 GN=At4g29190 PE=2 SV=1 -	-
BjuVB03G23800	-1.06599	-	-	-	Q9FF29|PR5K_ARATH PR5-like receptor kinase OS=Arabidopsis thaliana OX=3702 GN=PR5K PE=1 SV=1 PF00069:Protein kinase domain|PF00314:Thaumatin family	Thaumatin
BjuVB02G10750	-2.27425	-2.44755	-	-	-	-
BjuVB05G37120	-1.21354	-	-	-	Q9ZT42|RHF2A_ARATH E3 ubiquitin-protein ligase RHF2A OS=Arabidopsis thaliana OX=3702 GN=RHF2A PE=2 SV=1 PF13639:Ring finger domain	-
BjuVA04G30120	-1.34099	-	-	-	O22287|GMPP1_ARATH Mannose-1-phosphate guanylyltransferase 1 OS=Arabidopsis thaliana OX=3702 GN=CYT1 PE=1 SV=1 PF00132:Bacterial transferase hexapeptide (six repeats)|PF00483:Nucleotidyl transferase	Hexapep
BjuVB06G40360	-5.18355	-	-2.62682	-	Q43383|ACCH5_ARATH 1-aminocyclopropane-1-carboxylate oxidase homolog 5 OS=Arabidopsis thaliana OX=3702 GN=2A6 PE=2 SV=2 PF14226:non-haem dioxygenase in morphine synthesis N-terminal|PF03171:2OG-Fe(II) oxygenase superfamily	2OG-FeII_Oxy
BjuVB05G35440	-3.23861	-	-	-	Q42410|ZAT12_ARATH Zinc finger protein ZAT12 OS=Arabidopsis thaliana OX=3702 GN=ZAT12 PE=2 SV=1 PF13912:C2H2-type zinc finger	-
BjuVB05G51270	1.04569	-	-	-	P51413|RL172_ARATH 60S ribosomal protein L17-2 OS=Arabidopsis thaliana OX=3702 GN=RPL17B PE=2 SV=2 PF00237:Ribosomal protein L22p/L17e	-
BjuVA07G34010	-2.2328	-	-	-2.3974	P83506|NLTP2_MAIZE Probable non-specific lipid-transfer protein 2 OS=Zea mays OX=4577 PE=1 SV=1 -	-
BjuVA02G16770	4.24776	-	-	4.90474	Q04980|LTI65_ARATH Low-temperature-induced 65 kDa protein OS=Arabidopsis thaliana OX=3702 GN=LTI65 PE=2 SV=2 -	-
BjuVB08G27310	-1.27985	-	-	1.08768	O22187|Y2232_ARATH Probable receptor-like protein kinase At2g23200 OS=Arabidopsis thaliana OX=3702 GN=At2g23200 PE=3 SV=1 PF07714:Protein tyrosine and serine/threonine kinase|PF12819:Malectin-like domain	Pkinase_Tyr
BjuVA02G17410	2.91358	8.30578	9.37644	9.21732	P38418|LOX2_ARATH Lipoxygenase 2, chloroplastic OS=Arabidopsis thaliana OX=3702 GN=LOX2 PE=1 SV=1 PF00305:Lipoxygenase|PF01477:PLAT/LH2 domain	Lipoxygenase
BjuV_Contig00580_ERROPOS930405+G00230	-1.26859	-	-1.03971	-	Q96540|FRI1_BRANA Ferritin-1, chloroplastic OS=Brassica napus OX=3708 GN=LSC30 PE=2 SV=1 PF00210:Ferritin-like domain	Ferritin
BjuVB04G24370	-1.23416	-	-1.06762	-	I1LPE9|NAC6_SOYBN NAC domain-containing protein 6 OS=Glycine max OX=3847 GN=NAC6 PE=2 SV=1 PF02365:No apical meristem (NAM) protein	NAM
BjuVA03G15240	1.16734	-	-	-	Q84JK8|MAKR6_ARATH Probable membrane-associated kinase regulator 6 OS=Arabidopsis thaliana OX=3702 GN=MAKR6 PE=2 SV=1 -	-
BjuVA03G54060	1.66978	-	-	-	PF04398:Protein of unknown function, DUF538	-
BjuVA07G22570	-1.49327	-	1.64438	-	Q9SV30|GATA8_ARATH GATA transcription factor 8 OS=Arabidopsis thaliana OX=3702 GN=GATA8 PE=1 SV=1 PF00320:GATA zinc finger	GATA
BjuVB05G52180	-1.30452	-	-	-	Q9M9C6|P2C15_ARATH Probable protein phosphatase 2C 15 OS=Arabidopsis thaliana OX=3702 GN=At1g68410 PE=2 SV=1 PF00481:Protein phosphatase 2C	PP2C
BjuVA03G15940	3.83183	5.74396	5.35639	4.90962	Q9LLR7|NLTP3_ARATH Non-specific lipid-transfer protein 3 OS=Arabidopsis thaliana OX=3702 GN=LTP3 PE=3 SV=1 PF00234:Protease inhibitor/seed storage/LTP family	-
BjuVB08G54930	1.33861	-	-	-	Q38867|CP19C_ARATH Peptidyl-prolyl cis-trans isomerase CYP19-3 OS=Arabidopsis thaliana OX=3702 GN=CYP19-3 PE=2 SV=2 PF00160:Cyclophilin type peptidyl-prolyl cis-trans isomerase/CLD	Pro_isomerase
BjuVB08G23590	1.34206	-	-	-	O22841|CHI62_ARATH Endochitinase At2g43620 OS=Arabidopsis thaliana OX=3702 GN=At2g43620 PE=3 SV=1 PF00187:Chitin recognition protein|PF00182:Chitinase class I	-
BjuVA06G00700	-1.15131	1.38107	1.43219	2.2661	A5PHT0|Y1448_ARATH Uncharacterized protein At1g24485 OS=Arabidopsis thaliana OX=3702 GN=RWK1 PE=2 SV=2 PF12819:Malectin-like domain	-
BjuVA09G37940	-1.03194	-	1.57019	-	B9DGG8|DRM1_ARATH Dormancy-associated protein 1 OS=Arabidopsis thaliana OX=3702 GN=DRM1 PE=1 SV=1 PF05564:Dormancy/auxin associated protein	-
BjuVA10G01420	1.37773	-	-	1.39453	PF09420:Ribosome biogenesis protein Nop16	-
BjuVA01G30270	-2.01009	-	-	-	O80742|PUB19_ARATH U-box domain-containing protein 19 OS=Arabidopsis thaliana OX=3702 GN=PUB19 PE=2 SV=1 PF00514:Armadillo/beta-catenin-like repeat|PF04564:U-box domain	U-box
BjuVB03G46710	1.15987	-	-	-	Q9C9C9|SOT18_ARATH Cytosolic sulfotransferase 18 OS=Arabidopsis thaliana OX=3702 GN=SOT18 PE=1 SV=1 PF00685:Sulfotransferase domain	Sulfotransfer_1
BjuVB08G55050	1.23755	-	-	-	Q9LYM2|AVT6C_ARATH Amino acid transporter AVT6C OS=Arabidopsis thaliana OX=3702 GN=AVT6C PE=2 SV=1 PF01490:Transmembrane amino acid transporter protein	Aa_trans
BjuVA02G01680	1.1475	-	-	-	Q9LZ17|RS174_ARATH 40S ribosomal protein S17-4 OS=Arabidopsis thaliana OX=3702 GN=RPS17D PE=2 SV=3 PF00833:Ribosomal S17	-
BjuVA07G10870	-1.14071	-	-	-	Q9ASQ6|Y1972_ARATH Probable LRR receptor-like serine/threonine-protein kinase At1g29720 OS=Arabidopsis thaliana OX=3702 GN=RFK1 PE=2 SV=3 PF11721:Malectin domain|PF07714:Protein tyrosine and serine/threonine kinase|PF13855:Leucine rich repeat	Pkinase_Tyr
BjuVB06G36680	-1.18524	-	-1.22454	-1.63983	P0DKI3|TRNH1_ARATH Tropinone reductase homolog At1g07440 OS=Arabidopsis thaliana OX=3702 GN=At1g07440 PE=1 SV=1 PF13561:Enoyl-(Acyl carrier protein) reductase	-
BjuVA07G34020	-1.43525	-	-	-2.32321	-	-
BjuVB05G02260	1.01208	-	-1.13446	-	Q9SCV9|BGAL3_ARATH Beta-galactosidase 3 OS=Arabidopsis thaliana OX=3702 GN=BGAL3 PE=2 SV=1 PF01301:Glycosyl hydrolases family 35|PF17834:Beta-sandwich domain in beta galactosidase	-
BjuV_Contig01041G00380	3.8279	-	-	-	F4HVY0|CER1_ARATH Very-long-chain aldehyde decarbonylase CER1 OS=Arabidopsis thaliana OX=3702 GN=CER1 PE=1 SV=1 PF04116:Fatty acid hydroxylase superfamily|PF12076:WAX2 C-terminal domain	-
BjuVB06G29660	2.12353	-	-	2.25284	Q9FVQ1|NUCL1_ARATH Nucleolin 1 OS=Arabidopsis thaliana OX=3702 GN=NUCL1 PE=1 SV=1 PF00076:RNA recognition motif. (a.k.a. RRM, RBD, or RNP domain)	RRM_1
BjuVA06G26390	1.98146	-	-	-	Q9STM6|GDL57_ARATH GDSL esterase/lipase At3g48460 OS=Arabidopsis thaliana OX=3702 GN=At3g48460 PE=2 SV=1 PF00657:GDSL-like Lipase/Acylhydrolase	Lipase_GDSL
BjuVB02G32980	-1.33765	-	-	-	F4JWM0|DSC2_ARATH Disease resistance-like protein DSC2 OS=Arabidopsis thaliana OX=3702 GN=DSC2 PE=1 SV=1 PF01582:TIR domain|PF00931:NB-ARC domain	TIR
BjuVB02G35520	1.00654	-	-	-	Q9LF37|CLPB3_ARATH Chaperone protein ClpB3, chloroplastic OS=Arabidopsis thaliana OX=3702 GN=CLPB3 PE=1 SV=1 PF07724:AAA domain (Cdc48 subfamily)|PF02861:Clp amino terminal domain, pathogenicity island component|PF10431:C-terminal, D2-small domain, of ClpB protein|PF00004:ATPase family associated with various cellular activities (AAA)|PF17871:AAA lid domain	Clp_N
BjuVB04G49780	-1.02287	-	-	-	O80339|ERF82_ARATH Ethylene-responsive transcription factor 3 OS=Arabidopsis thaliana OX=3702 GN=ERF3 PE=1 SV=1 PF00847:AP2 domain	AP2
BjuVB01G27180	-1.30397	-	-	-	Q9SJ41|C3H18_ARATH Zinc finger CCCH domain-containing protein 18 OS=Arabidopsis thaliana OX=3702 GN=At2g05160 PE=2 SV=1 PF00076:RNA recognition motif. (a.k.a. RRM, RBD, or RNP domain)|PF12872:OST-HTH/LOTUS domain	RRM_1
BjuVB01G07120	1.20114	-1.30597	-2.66781	-3.03396	P25818|TIP11_ARATH Aquaporin TIP1-1 OS=Arabidopsis thaliana OX=3702 GN=TIP1-1 PE=1 SV=1 PF00230:Major intrinsic protein	-
BjuVA07G36580	-1.71758	-	1.16889	-	Q6NMS0|GSTUC_ARATH Glutathione S-transferase U12 OS=Arabidopsis thaliana OX=3702 GN=GSTU12 PE=2 SV=2 PF02798:Glutathione S-transferase, N-terminal domain	GST_N
BjuVA08G09470	-2.25458	-	-	-2.67553	-	-
BjuVB01G13780	1.10037	-	-	-	Q8RUN2|LOG1_ARATH Cytokinin riboside 5'-monophosphate phosphoribohydrolase LOG1 OS=Arabidopsis thaliana OX=3702 GN=LOG1 PE=1 SV=1 PF03641:Possible lysine decarboxylase	-
BjuVB06G37280	1.1755	-	-	-	Q14692|BMS1_HUMAN Ribosome biogenesis protein BMS1 homolog OS=Homo sapiens OX=9606 GN=BMS1 PE=1 SV=1 PF08142:AARP2CN (NUC121) domain|PF04950:40S ribosome biogenesis protein Tsr1 and BMS1 C-terminal	-
BjuVA06G45490	1.2818	-	-	-	P42794|RL112_ARATH 60S ribosomal protein L11-2 OS=Arabidopsis thaliana OX=3702 GN=RPL11B PE=2 SV=2 PF00281:Ribosomal protein L5|PF00673:ribosomal L5P family C-terminus	-
BjuVA01G07360	1.35476	2.36946	1.36109	3.88375	Q9M095|RC23_ARATH UPF0057 membrane protein At4g30650 OS=Arabidopsis thaliana OX=3702 GN=At4g30650 PE=3 SV=1 -	-
BjuVA09G20920	-1.86037	-	2.34186	1.90703	Q9ZVM9|Y1461_ARATH Probable serine/threonine-protein kinase At1g54610 OS=Arabidopsis thaliana OX=3702 GN=At1g54610 PE=1 SV=1 PF00069:Protein kinase domain	Pkinase
BjuVA05G09420	1.09446	-	-	-	P49636|RL40_NICSY Ubiquitin-60S ribosomal protein L40 OS=Nicotiana sylvestris OX=4096 GN=UBICEP52-7 PE=2 SV=2 PF00240:Ubiquitin family|PF01020:Ribosomal L40e family	ubiquitin
BjuVB05G12990	-1.50505	-	-	-1.4444	-	-
BjuVA01G37660	1.00982	-	-	-	Q9LV28|GPLPC_ARATH Receptor for activated C kinase 1C OS=Arabidopsis thaliana OX=3702 GN=RACK1C PE=1 SV=1 PF00400:WD domain, G-beta repeat	WD40
BjuVA02G33200	1.03996	-	-1.11548	-	C0LGH3|Y5614_ARATH Probable LRR receptor-like serine/threonine-protein kinase At1g56140 OS=Arabidopsis thaliana OX=3702 GN=At1g56140 PE=2 SV=2 PF11721:Malectin domain|PF07714:Protein tyrosine and serine/threonine kinase	Pkinase_Tyr
BjuVB03G39220	-2.49594	-	-	-	Q9FIX8|PCFS5_ARATH Polyadenylation and cleavage factor homolog 5 OS=Arabidopsis thaliana OX=3702 GN=PCFS5 PE=1 SV=1 -	-
BjuVA06G34290	1.14587	-	-1.53325	-	Q9FLV0|DMR6_ARATH Protein DOWNY MILDEW RESISTANCE 6 OS=Arabidopsis thaliana OX=3702 GN=DMR6 PE=1 SV=1 PF14226:non-haem dioxygenase in morphine synthesis N-terminal|PF03171:2OG-Fe(II) oxygenase superfamily	2OG-FeII_Oxy
BjuVB04G08610	1.23408	-	-	-	O64503|UTR1_ARATH UDP-galactose/UDP-glucose transporter 1 OS=Arabidopsis thaliana OX=3702 GN=UTR1 PE=1 SV=1 PF08449:UAA transporter family	-
BjuVA09G56740	2.12032	-	-	-	O80467|SDT_ARATH Spermidine sinapoyl-CoA acyltransferase OS=Arabidopsis thaliana OX=3702 GN=SDT PE=1 SV=1 PF02458:Transferase family	-
BjuVB07G30460	-1.28531	-	-	-1.24173	O80340|ERF78_ARATH Ethylene-responsive transcription factor 4 OS=Arabidopsis thaliana OX=3702 GN=ERF4 PE=1 SV=1 PF00847:AP2 domain	AP2
BjuVA02G19750	-1.1743	-	-	-	C0LGH2|Y1561_ARATH Probable LRR receptor-like serine/threonine-protein kinase At1g56130 OS=Arabidopsis thaliana OX=3702 GN=At1g56130 PE=2 SV=2 PF07714:Protein tyrosine and serine/threonine kinase|PF11721:Malectin domain	Pkinase_Tyr
BjuVA10G09800	-1.59461	-1.89268	-3.20915	-3.17067	Q9FLI7|NEET_ARATH CDGSH iron-sulfur domain-containing protein NEET OS=Arabidopsis thaliana OX=3702 GN=NEET PE=1 SV=1 PF09360:Iron-binding zinc finger CDGSH type	-
BjuVB04G49000	-2.85067	-	1.33451	-	F4KHI3|VICTR_ARATH Protein VARIATION IN COMPOUND TRIGGERED ROOT growth response OS=Arabidopsis thaliana OX=3702 GN=VICTR PE=1 SV=1 PF07725:Leucine Rich Repeat|PF00931:NB-ARC domain|PF01582:TIR domain	TIR
BjuVA09G39760	1.04213	-	-1.44786	-	Q9XF43|KCS6_ARATH 3-ketoacyl-CoA synthase 6 OS=Arabidopsis thaliana OX=3702 GN=CUT1 PE=1 SV=1 PF08541:3-Oxoacyl-[acyl-carrier-protein (ACP)] synthase III C terminal|PF08392:FAE1/Type III polyketide synthase-like protein	-
BjuVA03G46710	-1.75913	-	-	-3.17193	Q9FKG1|EF104_ARATH Ethylene-responsive transcription factor ERF104 OS=Arabidopsis thaliana OX=3702 GN=ERF104 PE=1 SV=1 PF00847:AP2 domain	AP2
BjuVA02G10050	1.13497	-	1.16525	-	-	-
BjuVA10G32010	1.02633	-	-	-	Q9LZ17|RS174_ARATH 40S ribosomal protein S17-4 OS=Arabidopsis thaliana OX=3702 GN=RPS17D PE=2 SV=3 PF00833:Ribosomal S17	-
BjuVA08G10500	1.20149	-	-	-	P53303|ZPR1_YEAST Zinc finger protein ZPR1 OS=Saccharomyces cerevisiae (strain ATCC 204508 / S288c) OX=559292 GN=ZPR1 PE=1 SV=1 PF03367:ZPR1 zinc-finger domain	-
BjuVA09G40990	-1.20037	-	-	-	Q94K98|Y1720_ARATH Glycosyltransferase family 92 protein At1g27200 OS=Arabidopsis thaliana OX=3702 GN=At1g27200 PE=2 SV=2 PF01697:Glycosyltransferase family 92	-
BjuVA10G28180	1.00095	-	-	1.85365	PF00564:PB1 domain	-
BjuVA10G00660	-1.30661	-	-	1.50917	Q9MAM1|CIPK9_ARATH CBL-interacting serine/threonine-protein kinase 9 OS=Arabidopsis thaliana OX=3702 GN=CIPK9 PE=1 SV=2 PF00069:Protein kinase domain|PF03822:NAF domain	Pkinase
BjuVB07G26220	1.05687	-	-	-	P42791|RL182_ARATH 60S ribosomal protein L18-2 OS=Arabidopsis thaliana OX=3702 GN=RPL18B PE=1 SV=2 PF17135:Ribosomal protein 60S L18 and 50S L18e	-
BjuVA01G19230	2.14758	-	-	-	PF06764:Protein of unknown function (DUF1223)	-
BjuVA05G25840	1.12787	-	-	-	P49678|IAA2_ARATH Auxin-responsive protein IAA2 OS=Arabidopsis thaliana OX=3702 GN=IAA2 PE=1 SV=3 PF02309:AUX/IAA family	-
BjuVB03G15140	1.36256	-	-	-	Q9SZP1|MYB4_ARATH Transcription repressor MYB4 OS=Arabidopsis thaliana OX=3702 GN=MYB4 PE=1 SV=1 PF00249:Myb-like DNA-binding domain	Myb_DNA-binding
BjuVB01G31840	1.4794	2.54127	-	3.74438	Q9LUW6|RH9_ARATH DEAD-box ATP-dependent RNA helicase 9, mitochondrial OS=Arabidopsis thaliana OX=3702 GN=RH9 PE=1 SV=1 PF00271:Helicase conserved C-terminal domain|PF00270:DEAD/DEAH box helicase	DEAD
BjuVA09G50800	1.28866	-	-1.91416	-1.41112	P45724|PAL2_ARATH Phenylalanine ammonia-lyase 2 OS=Arabidopsis thaliana OX=3702 GN=PAL2 PE=1 SV=2 PF00221:Aromatic amino acid lyase	-
BjuVA03G42430	-1.40437	-	-	-1.88338	Q6NN02|Y4445_ARATH Uncharacterized protein At4g14450, chloroplastic OS=Arabidopsis thaliana OX=3702 GN=At4g14450 PE=2 SV=1 -	-
BjuVB05G32670	1.91361	-	-	-	Q9FM82|GGLO4_ARATH Probable L-gulonolactone oxidase 4 OS=Arabidopsis thaliana OX=3702 GN=GULLO4 PE=2 SV=1 PF04030:D-arabinono-1,4-lactone oxidase|PF01565:FAD binding domain	FAD_binding_4
BjuVA06G10240	-1.87354	-	-	-2.17669	Q8GYH5|BAD1_ARATH Ankyrin repeat-containing protein BDA1 OS=Arabidopsis thaliana OX=3702 GN=BAD1 PE=1 SV=1 PF12796:Ankyrin repeats (3 copies)	-
BjuVA02G11470	-2.7494	-	-	-	Q42410|ZAT12_ARATH Zinc finger protein ZAT12 OS=Arabidopsis thaliana OX=3702 GN=ZAT12 PE=2 SV=1 PF13912:C2H2-type zinc finger	-
BjuVB06G36910	-1.15708	-	-	-2.4333	Q8RX37|P2C02_ARATH Probable protein phosphatase 2C 2 OS=Arabidopsis thaliana OX=3702 GN=At1g07160 PE=2 SV=1 PF00481:Protein phosphatase 2C	PP2C
BjuVA01G18430	-1.02768	-	-	-	O65583|UKL4_ARATH Uridine kinase-like protein 4 OS=Arabidopsis thaliana OX=3702 GN=UKL4 PE=2 SV=2 PF00485:Phosphoribulokinase / Uridine kinase family|PF14681:Uracil phosphoribosyltransferase|PF00274:Fructose-bisphosphate aldolase class-I	-
BjuVB08G45110	1.37816	1.58657	-	-	Q9FVE6|HDT1_ARATH Histone deacetylase HDT1 OS=Arabidopsis thaliana OX=3702 GN=HDT1 PE=1 SV=1 PF17800:Nucleoplasmin-like domain	-
BjuVA03G41150	-1.73893	-	-	-	Q945M9|NFYA9_ARATH Nuclear transcription factor Y subunit A-9 OS=Arabidopsis thaliana OX=3702 GN=NFYA9 PE=1 SV=1 PF02045:CCAAT-binding transcription factor (CBF-B/NF-YA) subunit B	CBFB_NFYA
BjuVA06G08780	-1.9667	-	-3.80828	-	Q9LE33|HPR3_ARATH Glyoxylate/hydroxypyruvate reductase HPR3 OS=Arabidopsis thaliana OX=3702 GN=HPR3 PE=2 SV=1 PF02826:D-isomer specific 2-hydroxyacid dehydrogenase, NAD binding domain|PF00389:D-isomer specific 2-hydroxyacid dehydrogenase, catalytic domain	2-Hacid_dh_C
BjuVA07G21450	-1.25836	-	-	-	O60136|YNS5_SCHPO Uncharacterized WD repeat-containing protein C18H10.05 OS=Schizosaccharomyces pombe (strain 972 / ATCC 24843) OX=284812 GN=SPBC18H10.05 PE=4 SV=1 PF00400:WD domain, G-beta repeat	WD40
BjuVA01G03490	1.67687	-	1.14101	-	P25819|CATA2_ARATH Catalase-2 OS=Arabidopsis thaliana OX=3702 GN=CAT2 PE=1 SV=3 PF00199:Catalase|PF06628:Catalase-related immune-responsive	Catalase
BjuVB03G06890	1.8959	-	-	1.76718	B6JX19|UTP25_SCHJY U3 small nucleolar RNA-associated protein 25 OS=Schizosaccharomyces japonicus (strain yFS275 / FY16936) OX=402676 GN=utp25 PE=3 SV=1 PF06862:Utp25, U3 small nucleolar RNA-associated SSU processome protein 25	-
BjuVA03G06500	-1.11113	-	-	-	Q4F883|SG101_ARATH Senescence-associated carboxylesterase 101 OS=Arabidopsis thaliana OX=3702 GN=SAG101 PE=1 SV=1 PF18117:Enhanced disease susceptibility 1 protein EP domain|PF01764:Lipase (class 3)	Lipase_3
BjuVA10G25460	-1.18436	-	-	-	Q94CD4|GILP_ARATH GSH-induced LITAF domain protein OS=Arabidopsis thaliana OX=3702 GN=GILP PE=1 SV=1 PF10601:LITAF-like zinc ribbon domain	-
BjuVB01G33750	-1.59177	2.42441	-2.50878	1.9959	Q8RWR1|JMJ30_ARATH Lysine-specific demethylase JMJ30 OS=Arabidopsis thaliana OX=3702 GN=JMJ30 PE=1 SV=1 PF13621:Cupin-like domain	-
BjuVA06G04420	-1.21259	-	-	-	Q9LQP8|KCS3_ARATH 3-ketoacyl-CoA synthase 3 OS=Arabidopsis thaliana OX=3702 GN=KCS3 PE=2 SV=3 PF08392:FAE1/Type III polyketide synthase-like protein|PF08541:3-Oxoacyl-[acyl-carrier-protein (ACP)] synthase III C terminal	-
BjuVA03G61850	1.19809	-	-	-	O49499|CAMT4_ARATH Caffeoyl-CoA O-methyltransferase 1 OS=Arabidopsis thaliana OX=3702 GN=CCOAOMT1 PE=1 SV=1 PF01596:O-methyltransferase	-
BjuVB08G05620	1.05689	-	-	-	Q8LD03|RS73_ARATH 40S ribosomal protein S7-3 OS=Arabidopsis thaliana OX=3702 GN=RPS7C PE=1 SV=2 PF01251:Ribosomal protein S7e	-
BjuVB03G49800	-1.17759	-	-	-	-	-
BjuVB03G30110	-1.07022	-	-	-1.84768	Q9SGN6|NSL1_ARATH MACPF domain-containing protein NSL1 OS=Arabidopsis thaliana OX=3702 GN=NSL1 PE=2 SV=1 PF01823:MAC/Perforin domain	-
BjuVB02G32970	1.09488	-	-	-	Q42340|RS163_ARATH 40S ribosomal protein S16-3 OS=Arabidopsis thaliana OX=3702 GN=RPS16C PE=2 SV=1 PF00380:Ribosomal protein S9/S16	-
BjuVB01G20310	-1.23669	-	-	-1.73277	Q9FJ24|BDG2_ARATH Probable lysophospholipase BODYGUARD 2 OS=Arabidopsis thaliana OX=3702 GN=BDG2 PE=2 SV=1 PF00561:alpha/beta hydrolase fold	Abhydrolase_1
BjuVA03G29550	1.22974	2.38723	-	1.80194	Q9ZS91|MSRB5_ARATH Peptide methionine sulfoxide reductase B5 OS=Arabidopsis thaliana OX=3702 GN=MSRB5 PE=1 SV=1 PF01641:SelR domain	-
BjuVB03G44990	3.03595	5.96298	6.91355	7.27098	Q9C7S6|KTI2_ARATH Kunitz trypsin inhibitor 2 OS=Arabidopsis thaliana OX=3702 GN=KTI2 PE=1 SV=1 PF00197:Trypsin and protease inhibitor	-
BjuVA02G44730	1.77412	-	-	-	Q8GYE8|NSUN5_ARATH 25S rRNA (cytosine-C(5))-methyltransferase NSUN5 OS=Arabidopsis thaliana OX=3702 GN=NSUN5 PE=1 SV=1 PF01189:16S rRNA methyltransferase RsmB/F	-
BjuVB08G56040	2.45875	-	-	-	-	-
BjuVB04G35810	-1.39523	1.4895	-	2.17153	-	-
BjuVB02G34450	1.58268	-	-	-	Q2KJJ5|TBL3_BOVIN Transducin beta-like protein 3 OS=Bos taurus OX=9913 GN=TBL3 PE=2 SV=1 PF00400:WD domain, G-beta repeat|PF08625:Utp13 specific WD40 associated domain	WD40
BjuVA03G20400	1.00837	-	-	-	O80929|RL361_ARATH 60S ribosomal protein L36-1 OS=Arabidopsis thaliana OX=3702 GN=RPL36A PE=3 SV=1 PF01158:Ribosomal protein L36e	-
BjuVA03G52180	-2.57287	-	-	-	Q9SVS1|BGL47_ARATH Beta-glucosidase 47 OS=Arabidopsis thaliana OX=3702 GN=BGLU47 PE=3 SV=2 PF00232:Glycosyl hydrolase family 1	Glyco_hydro_1
BjuVB03G21990	-1.06937	-	-	1.38066	P0C8Q2|PP323_ARATH Pentatricopeptide repeat-containing protein At4g19191, mitochondrial OS=Arabidopsis thaliana OX=3702 GN=PCMP-E1 PE=2 SV=1 -	-
BjuVB08G56470	1.18467	-	-	-	Q9SVY0|NRPA1_ARATH DNA-directed RNA polymerase I subunit 1 OS=Arabidopsis thaliana OX=3702 GN=NRPA1 PE=3 SV=1 PF05000:RNA polymerase Rpb1, domain 4|PF04983:RNA polymerase Rpb1, domain 3|PF00623:RNA polymerase Rpb1, domain 2|PF04998:RNA polymerase Rpb1, domain 5|PF04997:RNA polymerase Rpb1, domain 1	-
BjuVA06G34060	-1.26966	-	-	-	O60136|YNS5_SCHPO Uncharacterized WD repeat-containing protein C18H10.05 OS=Schizosaccharomyces pombe (strain 972 / ATCC 24843) OX=284812 GN=SPBC18H10.05 PE=4 SV=1 PF00400:WD domain, G-beta repeat	WD40
BjuVA03G40110	1.11598	-	-	-	Q9C8F7|RL301_ARATH Putative 60S ribosomal protein L30-1 OS=Arabidopsis thaliana OX=3702 GN=RPL30A PE=3 SV=1 PF01248:Ribosomal protein L7Ae/L30e/S12e/Gadd45 family	-
BjuVB05G22460	-1.35527	1.39572	1.23978	1.99449	D4AZ24|ENG1_ARTBC Probable endo-1,3(4)-beta-glucanase ARB_01444 OS=Arthroderma benhamiae (strain ATCC MYA-4681 / CBS 112371) OX=663331 GN=ARB_01444 PE=1 SV=1 PF17652:Glycosyl hydrolase family 81 C-terminal domain|PF03639:Glycosyl hydrolase family 81 N-terminal domain	-
BjuVB08G50230	-1.08066	-	-	-	Q38834|R13L4_ARATH Disease resistance RPP13-like protein 4 OS=Arabidopsis thaliana OX=3702 GN=RPP13L4 PE=1 SV=2 PF00931:NB-ARC domain|PF00004:ATPase family associated with various cellular activities (AAA)|PF14363:Domain associated at C-terminal with AAA|PF18052:Rx N-terminal domain	NB-ARC
BjuVB03G46140	6.24277	-	5.5302	-	PF12146:Serine aminopeptidase, S33	-
BjuVA01G41060	1.37092	-	-	-	Q43866|INV1_ARATH Beta-fructofuranosidase, insoluble isoenzyme CWINV1 OS=Arabidopsis thaliana OX=3702 GN=CWINV1 PE=1 SV=1 PF08244:Glycosyl hydrolases family 32 C terminal|PF00251:Glycosyl hydrolases family 32 N-terminal domain	-
BjuVA08G12940	1.24532	-	-	-	Q9ZRZ8|RH28_ARATH DEAD-box ATP-dependent RNA helicase 28 OS=Arabidopsis thaliana OX=3702 GN=RH28 PE=2 SV=1 PF00270:DEAD/DEAH box helicase|PF00271:Helicase conserved C-terminal domain	DEAD
BjuVA09G64610	-1.76767	-	1.05534	-1.58507	O04086|Y1105_ARATH Probable receptor-like protein kinase At1g11050 OS=Arabidopsis thaliana OX=3702 GN=At1g11050 PE=2 SV=1 PF19160:SPARK|PF00069:Protein kinase domain	Pkinase
BjuV_Contig00458G00310	-1.0884	-	-	-	Q3EAF9|P2C49_ARATH Probable protein phosphatase 2C 49 OS=Arabidopsis thaliana OX=3702 GN=At3g62260 PE=2 SV=1 PF00481:Protein phosphatase 2C	PP2C
BjuVA07G38490	2.37213	-	-	2.13567	Q9C7S7|ERO1_ARATH Endoplasmic reticulum oxidoreductin-1 OS=Arabidopsis thaliana OX=3702 GN=AERO1 PE=1 SV=1 PF04137:Endoplasmic Reticulum Oxidoreductin 1 (ERO1)	-
BjuVA05G27740	-1.85319	-	-	-3.17178	Q9LJB7|BBX32_ARATH B-box zinc finger protein 32 OS=Arabidopsis thaliana OX=3702 GN=BBX32 PE=1 SV=1 -	-
BjuVB08G54710	-1.64155	-	1.01951	1.58801	-	-
BjuVB02G72030	-1.1425	-	-	-	P48002|KNAT5_ARATH Homeobox protein knotted-1-like 5 OS=Arabidopsis thaliana OX=3702 GN=KNAT5 PE=1 SV=2 PF03790:KNOX1 domain|PF03789:ELK domain|PF05920:Homeobox KN domain|PF03791:KNOX2 domain	KNOX2
BjuVB06G41860	-2.33346	-	1.87247	1.59709	Q9SII6|PIX13_ARATH Probable serine/threonine-protein kinase PIX13 OS=Arabidopsis thaliana OX=3702 GN=PIX13 PE=1 SV=2 PF07714:Protein tyrosine and serine/threonine kinase	Pkinase_Tyr
BjuVA02G20090	3.03715	-	-	-	-	-
BjuVA03G68780	-1.46741	-	-	-	Q9LQ02|NRPD1_ARATH DNA-directed RNA polymerase IV subunit 1 OS=Arabidopsis thaliana OX=3702 GN=NRPD1 PE=1 SV=1 PF04997:RNA polymerase Rpb1, domain 1|PF11523:Protein of unknown function (DUF3223)|PF05000:RNA polymerase Rpb1, domain 4|PF00623:RNA polymerase Rpb1, domain 2|PF04983:RNA polymerase Rpb1, domain 3	-
BjuVB07G17700	1.10642	1.34645	-	1.37579	Q42546|DPNP1_ARATH SAL1 phosphatase OS=Arabidopsis thaliana OX=3702 GN=SAL1 PE=1 SV=1 PF00459:Inositol monophosphatase family	-
BjuVB04G08700	-1.24324	-	-	-	Q9ZVP8|NAC35_ARATH NAC domain-containing protein 35 OS=Arabidopsis thaliana OX=3702 GN=NAC035 PE=1 SV=2 PF02365:No apical meristem (NAM) protein	NAM
BjuVB06G07040	4.98292	-	-	-	Q42641|NLTPA_BRAOT Non-specific lipid-transfer protein A OS=Brassica oleracea var. italica OX=36774 GN=WAX9A PE=3 SV=1 PF00234:Protease inhibitor/seed storage/LTP family	-
BjuVA03G28650	-1.00212	-	-	1.28577	-	-
BjuVB07G25210	-1.02868	-	-1.52114	-	-	-
BjuVA01G43530	1.30155	1.24348	-	-	Q9P4X3|UTP7_SCHPO Probable U3 small nucleolar RNA-associated protein 7 OS=Schizosaccharomyces pombe (strain 972 / ATCC 24843) OX=284812 GN=utp7 PE=3 SV=1 PF08149:BING4CT (NUC141) domain|PF00400:WD domain, G-beta repeat	WD40
BjuVA03G07920	1.58279	-2.18806	-2.42941	-4.71824	F4KGY6|RVE1_ARATH Protein REVEILLE 1 OS=Arabidopsis thaliana OX=3702 GN=RVE1 PE=1 SV=1 PF00249:Myb-like DNA-binding domain	Myb_DNA-binding
BjuVA03G63530	1.41373	-	-	-	Q70E96|AL3F1_ARATH Aldehyde dehydrogenase family 3 member F1 OS=Arabidopsis thaliana OX=3702 GN=ALDH3F1 PE=2 SV=2 PF00171:Aldehyde dehydrogenase family	Aldedh
BjuVB06G04150	1.04478	1.52207	1.54098	2.73949	O64879|BGL15_ARATH Beta-glucosidase 15 OS=Arabidopsis thaliana OX=3702 GN=BGLU15 PE=1 SV=1 PF00232:Glycosyl hydrolase family 1	Glyco_hydro_1
BjuVA06G06460	1.37109	-	-	-2.70264	Q9SA16|P2A09_ARATH Protein PHLOEM PROTEIN 2-LIKE A9 OS=Arabidopsis thaliana OX=3702 GN=PP2A9 PE=2 SV=1 PF14299:Phloem protein 2	-
BjuVA04G29290	-1.28617	-	-	-3.09172	Q8S8P5|WRK33_ARATH Probable WRKY transcription factor 33 OS=Arabidopsis thaliana OX=3702 GN=WRKY33 PE=1 SV=2 PF03106:WRKY DNA -binding domain	WRKY
BjuVA01G08350	-3.78891	-	-	-3.24732	PF13359:DDE superfamily endonuclease	-
BjuVB07G05700	1.12261	-	-1.00604	-2.10554	PF01852:START domain	START
BjuVA09G25450	-2.88603	-	-	-	-	-
BjuVA07G04200	1.23048	-	-	-	PF01190:Pollen protein Ole e 1 like	-
BjuVB02G29450	1.42269	-	-	-	Q9FF52|RL123_ARATH 60S ribosomal protein L12-3 OS=Arabidopsis thaliana OX=3702 GN=RPL12C PE=2 SV=1 PF03946:Ribosomal protein L11, N-terminal domain|PF00298:Ribosomal protein L11, RNA binding domain	-
BjuVB01G30270	1.36838	-	-	-	Q9LUG5|RPF2_ARATH Ribosome production factor 2 homolog OS=Arabidopsis thaliana OX=3702 GN=At3g23620 PE=2 SV=1 PF04427:Brix domain	-
BjuVA08G35060	1.10101	-	-	-	Q43291|RL211_ARATH 60S ribosomal protein L21-1 OS=Arabidopsis thaliana OX=3702 GN=RPL21A PE=2 SV=2 PF01157:Ribosomal protein L21e	-
BjuVB04G15920	-2.01923	-	-	-	-	-
BjuVA07G37400	-1.01141	-	-	-	Q88BD4|ALGC_PSESM Phosphomannomutase/phosphoglucomutase OS=Pseudomonas syringae pv. tomato (strain ATCC BAA-871 / DC3000) OX=223283 GN=algC PE=3 SV=1 PF02878:Phosphoglucomutase/phosphomannomutase, alpha/beta/alpha domain I|PF02880:Phosphoglucomutase/phosphomannomutase, alpha/beta/alpha domain III|PF02879:Phosphoglucomutase/phosphomannomutase, alpha/beta/alpha domain II	PGM_PMM_II
BjuVB06G37320	1.3792	1.32252	-	-	F4IDQ6|NIH_ARATH DExH-box ATP-dependent RNA helicase DExH2 OS=Arabidopsis thaliana OX=3702 GN=NIH PE=1 SV=1 PF04408:Helicase associated domain (HA2)|PF01424:R3H domain|PF00271:Helicase conserved C-terminal domain|PF00270:DEAD/DEAH box helicase	HA2
BjuVA09G42690	-1.14586	-	-	-	Q9LME4|P2C09_ARATH Probable protein phosphatase 2C 9 OS=Arabidopsis thaliana OX=3702 GN=At1g22280 PE=1 SV=1 PF00481:Protein phosphatase 2C	PP2C
BjuVA09G06180	-1.18829	-	-	-	Q9FIM9|CAMK4_ARATH CDPK-related kinase 4 OS=Arabidopsis thaliana OX=3702 GN=CRK4 PE=1 SV=1 PF00069:Protein kinase domain	Pkinase
BjuVA07G32130	-1.23093	-	-	-	F4I8W1|DUF2_ARATH DUF724 domain-containing protein 2 OS=Arabidopsis thaliana OX=3702 GN=DUF2 PE=2 SV=1 PF05641:Agenet domain|PF01426:BAH domain	Agenet
BjuVA05G09890	2.60767	2.78126	2.65589	-	PF04909:Amidohydrolase	Amidohydro_2
BjuVB06G03440	-2.0665	-	-	-	O22864|NLP8_ARATH Protein NLP8 OS=Arabidopsis thaliana OX=3702 GN=NLP8 PE=2 SV=1 PF02042:RWP-RK domain|PF00564:PB1 domain	RWP-RK
BjuVB03G57890	1.09556	-	-	-	Q8W4P9|TT9_ARATH Protein TRANSPARENT TESTA 9 OS=Arabidopsis thaliana OX=3702 GN=TT9 PE=2 SV=1 PF09758:Uncharacterised conserved protein	-
BjuVB04G04930	-1.69015	-	-1.28752	-2.72851	-	-
BjuVA02G23170	-1.05118	-	-	-	Q9SGG3|ALA5_ARATH Probable phospholipid-transporting ATPase 5 OS=Arabidopsis thaliana OX=3702 GN=ALA5 PE=3 SV=1 PF16209:Phospholipid-translocating ATPase N-terminal|PF16212:Phospholipid-translocating P-type ATPase C-terminal|PF13246:Cation transport ATPase (P-type)	-
BjuVB03G59170	1.126	1.42273	-	1.57027	Q9SIV0|SUR1_ARATH S-alkyl-thiohydroximate lyase SUR1 OS=Arabidopsis thaliana OX=3702 GN=SUR1 PE=1 SV=1 PF00155:Aminotransferase class I and II	Aminotran_1_2
BjuVB08G08850	1.06545	1.42162	-	-	Q56WH4|HDT2_ARATH Histone deacetylase HDT2 OS=Arabidopsis thaliana OX=3702 GN=HDT2 PE=1 SV=2 PF17800:Nucleoplasmin-like domain	-
BjuVB06G17930	1.00974	-	-	1.85836	Q9SK03|RAP27_ARATH Ethylene-responsive transcription factor RAP2-7 OS=Arabidopsis thaliana OX=3702 GN=RAP2-7 PE=2 SV=2 PF00847:AP2 domain	AP2
BjuVA07G27940	-1.06957	-	-	-	Q8H1E4|RAP24_ARATH Ethylene-responsive transcription factor RAP2-4 OS=Arabidopsis thaliana OX=3702 GN=RAP2-4 PE=1 SV=1 PF00847:AP2 domain	AP2
BjuVB02G63930	1.38087	1.70802	-	-	Q9FIR9|LSU2_ARATH Protein RESPONSE TO LOW SULFUR 2 OS=Arabidopsis thaliana OX=3702 GN=LSU2 PE=1 SV=1 -	-
BjuVB06G09630	-2.1298	-	-	-	Q93ZT5|EDL3_ARATH EID1-like F-box protein 3 OS=Arabidopsis thaliana OX=3702 GN=EDL3 PE=2 SV=1 -	-
BjuVA07G32060	-1.15621	-	-	-	Q9SX31|PERK9_ARATH Proline-rich receptor-like protein kinase PERK9 OS=Arabidopsis thaliana OX=3702 GN=PERK9 PE=1 SV=1 PF00069:Protein kinase domain	Pkinase
BjuVB01G01060	-1.42319	-	-	-2.34411	PF14309:Domain of unknown function (DUF4378)	-
BjuVB07G29730	-1.9045	-	-	-	O04133|SRC2_SOYBN Protein SRC2 OS=Glycine max OX=3847 GN=SRC2 PE=2 SV=1 -	-
BjuVB04G40710	-1.21862	-	-	-	Q9SA77|ARAE1_ARATH UDP-arabinose 4-epimerase 1 OS=Arabidopsis thaliana OX=3702 GN=MUR4 PE=1 SV=1 PF16363:GDP-mannose 4,6 dehydratase	-
BjuVB04G37630	1.12747	-	-	-	-	-
BjuVB02G63790	-1.29978	-	-	-	-	-
BjuVB03G19260	1.18953	-	-1.59218	-	Q93ZB9|FACR3_ARATH Fatty acyl-CoA reductase 3 OS=Arabidopsis thaliana OX=3702 GN=FAR3 PE=1 SV=1 PF03015:Male sterility protein|PF07993:Male sterility protein	NAD_binding_4
BjuVA03G51690	-1.32099	-	-	-	Q9SVG9|CML42_ARATH Calcium-binding protein CML42 OS=Arabidopsis thaliana OX=3702 GN=CML42 PE=1 SV=1 PF13405:EF-hand domain|PF13499:EF-hand domain pair	-
BjuVB04G13930	-2.50752	-	-	-	Q9ZU49|LPP1_ARATH Lipid phosphate phosphatase 1 OS=Arabidopsis thaliana OX=3702 GN=LPP1 PE=2 SV=2 PF01569:PAP2 superfamily	-
BjuVA10G26210	2.42468	-	-	-	P29830|HS176_ARATH 17.6 kDa class II heat shock protein OS=Arabidopsis thaliana OX=3702 GN=HSP17.6 PE=2 SV=1 PF00011:Hsp20/alpha crystallin family	-
BjuVB07G17200	-2.08203	-	-	-	-	-
BjuVB01G22230	-1.20131	-	-	-	Q945L4|WTR40_ARATH WAT1-related protein At5g40210 OS=Arabidopsis thaliana OX=3702 GN=At5g40210 PE=2 SV=1 PF00892:EamA-like transporter family	DUF6
BjuVB05G10590	1.33924	-	-	-	Q8VYM6|NOP2B_ARATH 26S rRNA (cytosine-C(5))-methyltransferase NOP2B OS=Arabidopsis thaliana OX=3702 GN=NOP2B PE=1 SV=1 PF01189:16S rRNA methyltransferase RsmB/F|PF17125:N-terminal domain of 16S rRNA methyltransferase RsmF	-
BjuVB02G09040	1.18755	-	-	-	Q43295|APK1_ARATH Adenylyl-sulfate kinase 1, chloroplastic OS=Arabidopsis thaliana OX=3702 GN=APK1 PE=1 SV=1 PF01583:Adenylylsulphate kinase	-
BjuVB06G15160	-1.62252	-	-	-	Q9SSW1|AZF1_ARATH Zinc finger protein AZF1 OS=Arabidopsis thaliana OX=3702 GN=AZF1 PE=2 SV=1 PF13912:C2H2-type zinc finger	-
BjuVB02G60400	-2.03612	-	-	-	O23406|U75D1_ARATH UDP-glycosyltransferase 75D1 OS=Arabidopsis thaliana OX=3702 GN=UGT75D1 PE=2 SV=2 PF00201:UDP-glucoronosyl and UDP-glucosyl transferase	UDPGT
BjuVB07G15010	-2.58546	-	-	-	-	-
BjuVB03G49900	1.02823	1.63105	2.03437	-	O49290|CPPM_ARATH Carboxyvinyl-carboxyphosphonate phosphorylmutase, chloroplastic OS=Arabidopsis thaliana OX=3702 GN=At1g77060 PE=1 SV=2 PF13714:Phosphoenolpyruvate phosphomutase	-
BjuVB04G17600	-5.5334	-	-	-	Q9FXB2|GOLS2_ARATH Galactinol synthase 2 OS=Arabidopsis thaliana OX=3702 GN=GOLS2 PE=1 SV=1 PF01501:Glycosyl transferase family 8	Glyco_transf_8
BjuVA01G40270	-1.26079	-	1.23948	1.93083	C0LGN2|Y3148_ARATH Probable leucine-rich repeat receptor-like serine/threonine-protein kinase At3g14840 OS=Arabidopsis thaliana OX=3702 GN=LRR-RLK PE=1 SV=1 PF11721:Malectin domain|PF07714:Protein tyrosine and serine/threonine kinase	Pkinase_Tyr
BjuVA03G17240	1.39206	1.67881	-	1.47057	Q9SIC9|PP178_ARATH Pentatricopeptide repeat-containing protein At2g31400, chloroplastic OS=Arabidopsis thaliana OX=3702 GN=At2g31400 PE=2 SV=1 -	-
BjuVA02G00810	1.47708	-	-2.25204	-1.94516	PF02458:Transferase family	-
BjuVA05G36200	1.00188	-	-2.05723	-3.11609	Q9LJE4|CPNB2_ARATH Chaperonin 60 subunit beta 2, chloroplastic OS=Arabidopsis thaliana OX=3702 GN=CPN60B2 PE=1 SV=1 PF00118:TCP-1/cpn60 chaperonin family	-
BjuVB05G56210	-2.40715	-	-	-	Q8VY81|NUD21_ARATH Nudix hydrolase 21, chloroplastic OS=Arabidopsis thaliana OX=3702 GN=NUDT21 PE=2 SV=1 PF00293:NUDIX domain	NUDIX
BjuVB06G01190	1.07813	-	-	2.66484	Q9SKE2|JAR1_ARATH Jasmonoyl--L-amino acid synthetase JAR1 OS=Arabidopsis thaliana OX=3702 GN=JAR1 PE=1 SV=2 PF03321:GH3 auxin-responsive promoter	-
BjuVA09G60550	1.44739	-	-	2.5534	-	-
BjuVB05G27170	1.02787	-	-	-	Q93VH9|RS41_ARATH 40S ribosomal protein S4-1 OS=Arabidopsis thaliana OX=3702 GN=RPS4A PE=2 SV=1 PF00900:Ribosomal family S4e|PF00467:KOW motif|PF08071:RS4NT (NUC023) domain|PF16121:40S ribosomal protein S4 C-terminus|PF01479:S4 domain	Ribosomal_S4e
BjuVA08G35430	-1.2593	-	-	-	O04023|SRC2_ARATH Protein SRC2 homolog OS=Arabidopsis thaliana OX=3702 GN=SRC2 PE=1 SV=1 PF00168:C2 domain	C2
BjuVB02G40710	-1.66482	-	1.55333	-	Q9FTA2|TCP21_ARATH Transcription factor TCP21 OS=Arabidopsis thaliana OX=3702 GN=TCP21 PE=1 SV=1 PF03634:TCP family transcription factor	TCP
BjuVA05G09070	1.13033	-	-	-	Q42347|RL241_ARATH 60S ribosomal protein L24-1 OS=Arabidopsis thaliana OX=3702 GN=RPL24A PE=1 SV=2 PF01246:Ribosomal protein L24e	-
BjuVA01G06620	-1.06494	-	-	-	Q9SV15|WRK11_ARATH Probable WRKY transcription factor 11 OS=Arabidopsis thaliana OX=3702 GN=WRKY11 PE=2 SV=2 PF03106:WRKY DNA -binding domain|PF10533:Plant zinc cluster domain	WRKY
BjuVA06G17350	1.06894	-	-	-	Q8L9J7|SWET1_ARATH Bidirectional sugar transporter SWEET1 OS=Arabidopsis thaliana OX=3702 GN=SWEET1 PE=1 SV=1 PF03083:Sugar efflux transporter for intercellular exchange	-
BjuVB01G42760	1.1531	-	-	-	Q9CAX6|RS142_ARATH 40S ribosomal protein S14-2 OS=Arabidopsis thaliana OX=3702 GN=RPS14B PE=1 SV=1 PF00411:Ribosomal protein S11	-
BjuVA08G04320	1.74266	-	-	-	P82353|NLTP2_PRUAR Non-specific lipid-transfer protein 2 OS=Prunus armeniaca OX=36596 PE=1 SV=1 PF14368:Probable lipid transfer	-
BjuVA04G03250	-1.92693	-	-	-	-	-
BjuVB06G26110	-1.0293	-	-	2.0044	Q8L636|NCL_ARATH Sodium/calcium exchanger NCL OS=Arabidopsis thaliana OX=3702 GN=NCL PE=2 SV=1 PF13499:EF-hand domain pair|PF01699:Sodium/calcium exchanger protein	Na_Ca_ex
BjuVA08G07980	1.06926	-	-	-	Q84WV0|GLYC7_ARATH Serine hydroxymethyltransferase 7 OS=Arabidopsis thaliana OX=3702 GN=SHM7 PE=2 SV=1 PF00464:Serine hydroxymethyltransferase	SHMT
BjuVA01G25820	1.01605	-	-	-	P42733|RS113_ARATH 40S ribosomal protein S11-3 OS=Arabidopsis thaliana OX=3702 GN=RPS11C PE=2 SV=2 PF16205:Ribosomal_S17 N-terminal|PF00366:Ribosomal protein S17	-
BjuVB06G36290	-1.01625	-	-	-	Q9LQP8|KCS3_ARATH 3-ketoacyl-CoA synthase 3 OS=Arabidopsis thaliana OX=3702 GN=KCS3 PE=2 SV=3 PF08541:3-Oxoacyl-[acyl-carrier-protein (ACP)] synthase III C terminal|PF08392:FAE1/Type III polyketide synthase-like protein	-
BjuVB02G32810	-1.42422	-	-	-	Q8L8Z8|GRXS2_ARATH Monothiol glutaredoxin-S2 OS=Arabidopsis thaliana OX=3702 GN=GRXS2 PE=3 SV=1 PF00462:Glutaredoxin	-
BjuVB06G47690	3.06431	2.88877	5.71701	4.7755	Q9M1J6|SSL9_ARATH Protein STRICTOSIDINE SYNTHASE-LIKE 9 OS=Arabidopsis thaliana OX=3702 GN=SSL9 PE=2 SV=1 PF03088:Strictosidine synthase	Str_synth
BjuVA08G34500	1.29608	1.37745	-	-	Q9XIK4|NT101_ARATH RNA cytidine acetyltransferase 1 OS=Arabidopsis thaliana OX=3702 GN=At1g10490 PE=2 SV=2 PF08351:Domain of unknown function (DUF1726)|PF13718:GNAT acetyltransferase 2|PF13725:Possible tRNA binding domain|PF05127:Helicase	-
BjuVA09G49450	2.19229	-	-	-	Q9SV31|PIP25_ARATH Probable aquaporin PIP2-5 OS=Arabidopsis thaliana OX=3702 GN=PIP2-5 PE=1 SV=1 PF00230:Major intrinsic protein	-
BjuVB04G44520	-1.01827	-	-	-	B8M9K0|TROPI_TALSN Hydrolase tropI OS=Talaromyces stipitatus (strain ATCC 10500 / CBS 375.48 / QM 6759 / NRRL 1006) OX=441959 GN=tropI PE=3 SV=1 PF01738:Dienelactone hydrolase family	-
BjuVA04G16070	-1.42017	-	1.59774	-	F4JK59|WTR33_ARATH WAT1-related protein At4g15540 OS=Arabidopsis thaliana OX=3702 GN=At4g15540 PE=2 SV=1 PF00892:EamA-like transporter family	DUF6
BjuVA10G31470	2.24914	2.58996	-	-	-	-
BjuVA02G39760	-1.25487	-	-	-1.41325	Q9LS06|RAVL4_ARATH AP2/ERF and B3 domain-containing transcription factor ARF14 OS=Arabidopsis thaliana OX=3702 GN=ARF14 PE=2 SV=1 PF00847:AP2 domain|PF02362:B3 DNA binding domain	B3
BjuVB05G57850	-1.04155	-	-	-	P42763|ERD14_ARATH Dehydrin ERD14 OS=Arabidopsis thaliana OX=3702 GN=ERD14 PE=1 SV=1 PF00257:Dehydrin	-
BjuVB04G29220	-1.71481	-	-	-2.00693	Q1G3U8|VQ1_ARATH VQ motif-containing protein 1 OS=Arabidopsis thaliana OX=3702 GN=VQ1 PE=1 SV=1 PF05678:VQ motif	-
BjuVB05G17450	1.06438	-	-	-	P42794|RL112_ARATH 60S ribosomal protein L11-2 OS=Arabidopsis thaliana OX=3702 GN=RPL11B PE=2 SV=2 PF00281:Ribosomal protein L5|PF00673:ribosomal L5P family C-terminus	-
BjuVA03G63400	-2.39272	-	1.33355	-	Q8W2F2|BH011_ARATH Transcription factor bHLH11 OS=Arabidopsis thaliana OX=3702 GN=BHLH11 PE=2 SV=2 PF00010:Helix-loop-helix DNA-binding domain	HLH
BjuVA02G28760	1.1138	-	-	-	A7ZFZ5|RS5_CAMC1 30S ribosomal protein S5 OS=Campylobacter concisus (strain 13826) OX=360104 GN=rpsE PE=3 SV=1 PF00333:Ribosomal protein S5, N-terminal domain|PF03719:Ribosomal protein S5, C-terminal domain	-
BjuVB05G58660	2.4589	-	-	2.75286	Q9LPU5|IGMT1_ARATH Indole glucosinolate O-methyltransferase 1 OS=Arabidopsis thaliana OX=3702 GN=IGMT1 PE=1 SV=1 PF08100:Dimerisation domain|PF00891:O-methyltransferase domain	-
BjuVA09G62980	-1.17278	-	1.88261	1.38958	Q9SAF5|ALA11_ARATH Probable phospholipid-transporting ATPase 11 OS=Arabidopsis thaliana OX=3702 GN=ALA11 PE=2 SV=1 PF13246:Cation transport ATPase (P-type)|PF00122:E1-E2 ATPase|PF16212:Phospholipid-translocating P-type ATPase C-terminal|PF16209:Phospholipid-translocating ATPase N-terminal	E1-E2_ATPase
BjuVA07G14920	-1.22977	-	-	-	Q9LME4|P2C09_ARATH Probable protein phosphatase 2C 9 OS=Arabidopsis thaliana OX=3702 GN=At1g22280 PE=1 SV=1 PF00481:Protein phosphatase 2C	PP2C
BjuVB06G51310	-1.18222	-	-	-	Q9FKA5|Y5957_ARATH Uncharacterized protein At5g39570 OS=Arabidopsis thaliana OX=3702 GN=At5g39570 PE=1 SV=1 -	-
BjuVA03G29230	1.23974	-	-	-	Q5XH16|NH2L1_XENLA NHP2-like protein 1 OS=Xenopus laevis OX=8355 GN=snu13 PE=2 SV=1 PF01248:Ribosomal protein L7Ae/L30e/S12e/Gadd45 family	-
BjuVA09G13720	-1.7488	-	-	-	F4I594|RLM1A_ARATH Disease resistance protein RML1A OS=Arabidopsis thaliana OX=3702 GN=RLM1A PE=3 SV=1 PF01582:TIR domain	TIR
BjuVB04G04750	1.00917	-	-	-	Q9SS17|RS241_ARATH 40S ribosomal protein S24-1 OS=Arabidopsis thaliana OX=3702 GN=RPS24A PE=2 SV=1 PF01282:Ribosomal protein S24e	Ribosomal_S24e
BjuVA09G43320	-1.79863	-	2.08203	-	Q9SN12|MYB77_ARATH Transcription factor MYB77 OS=Arabidopsis thaliana OX=3702 GN=MYB77 PE=1 SV=1 PF00249:Myb-like DNA-binding domain	Myb_DNA-binding
BjuVB01G21910	1.22142	-	-1.53594	-	Q9FND9|RFS5_ARATH Probable galactinol--sucrose galactosyltransferase 5 OS=Arabidopsis thaliana OX=3702 GN=RFS5 PE=1 SV=1 PF05691:Raffinose synthase or seed imbibition protein Sip1	-
BjuVA05G42540	-2.61435	-	1.29955	-	Q9MA62|RLF22_ARATH Protein RALF-like 22 OS=Arabidopsis thaliana OX=3702 GN=RALFL22 PE=3 SV=1 PF05498:Rapid ALkalinization Factor (RALF)	-
BjuVA03G68510	-1.24363	-	1.11871	-	O64784|Y1136_ARATH G-type lectin S-receptor-like serine/threonine-protein kinase At1g61360 OS=Arabidopsis thaliana OX=3702 GN=At1g61360 PE=2 SV=1 PF08276:PAN-like domain|PF07714:Protein tyrosine and serine/threonine kinase|PF01453:D-mannose binding lectin|PF00954:S-locus glycoprotein domain	Pkinase_Tyr
BjuVA01G23650	-1.2943	-	-1.67961	-	F4JTU7|RLP48_ARATH Receptor-like protein 48 OS=Arabidopsis thaliana OX=3702 GN=RLP48 PE=3 SV=2 PF08263:Leucine rich repeat N-terminal domain|PF13855:Leucine rich repeat	LRRNT_2
BjuVA08G34100	-2.41539	-	-	-	O64784|Y1136_ARATH G-type lectin S-receptor-like serine/threonine-protein kinase At1g61360 OS=Arabidopsis thaliana OX=3702 GN=At1g61360 PE=2 SV=1 PF07714:Protein tyrosine and serine/threonine kinase|PF01453:D-mannose binding lectin|PF00954:S-locus glycoprotein domain|PF08276:PAN-like domain	Pkinase_Tyr
BjuVA07G33740	-2.24361	-	-	-	Q9C710|PCFS1_ARATH Polyadenylation and cleavage factor homolog 1 OS=Arabidopsis thaliana OX=3702 GN=PCFS1 PE=1 SV=1 -	-
BjuVA03G11300	1.06602	-	-	-	Q00332|RS15A_BRANA 40S ribosomal protein S15a OS=Brassica napus OX=3708 GN=RPS15A PE=2 SV=3 PF00076:RNA recognition motif. (a.k.a. RRM, RBD, or RNP domain)|PF00410:Ribosomal protein S8	RRM_1
BjuVB04G25700	-1.19742	-	-	-	-	-
BjuVA10G13460	1.05286	1.06012	-	-	Q9FG73|NOP2A_ARATH 25S rRNA (cytosine-C(5))-methyltransferase NOP2A OS=Arabidopsis thaliana OX=3702 GN=NOP2A PE=1 SV=1 PF01189:16S rRNA methyltransferase RsmB/F|PF17125:N-terminal domain of 16S rRNA methyltransferase RsmF	-
BjuVB06G08030	-1.10179	-	-	-	-	-
BjuVA01G17700	-2.68337	-	-	-	Q38910|XTH23_ARATH Probable xyloglucan endotransglucosylase/hydrolase protein 23 OS=Arabidopsis thaliana OX=3702 GN=XTH23 PE=2 SV=1 PF06955:Xyloglucan endo-transglycosylase (XET) C-terminus|PF00722:Glycosyl hydrolases family 16	-
BjuVB01G34920	1.0194	1.80168	1.86099	2.38148	Q9LE06|BCAT4_ARATH Methionine aminotransferase BCAT4 OS=Arabidopsis thaliana OX=3702 GN=BCAT4 PE=1 SV=1 PF01063:Amino-transferase class IV	-
BjuVA07G11770	-3.2196	-	-	-3.14882	Q9C5I3|ERF76_ARATH Ethylene-responsive transcription factor 11 OS=Arabidopsis thaliana OX=3702 GN=ERF11 PE=1 SV=1 PF00847:AP2 domain	AP2
BjuVA10G05250	1.06879	1.24187	-	-	Q14692|BMS1_HUMAN Ribosome biogenesis protein BMS1 homolog OS=Homo sapiens OX=9606 GN=BMS1 PE=1 SV=1 PF08142:AARP2CN (NUC121) domain|PF04950:40S ribosome biogenesis protein Tsr1 and BMS1 C-terminal	-
BjuVA09G18910	1.35234	-	-	-	Q9FDZ9|RL212_ARATH 60S ribosomal protein L21-2 OS=Arabidopsis thaliana OX=3702 GN=RPL21E PE=2 SV=1 PF01157:Ribosomal protein L21e	-
BjuVB02G28100	-1.4599	-1.49753	-1.79373	-	-	-
BjuVA04G31460	-1.4647	-	-	-	Q55EX9|Y8948_DICDI Putative methyltransferase DDB_G0268948 OS=Dictyostelium discoideum OX=44689 GN=DDB_G0268948 PE=1 SV=2 PF08241:Methyltransferase domain	Methyltransf_11
BjuVB02G16680	1.33388	-2.22094	-	-3.21326	Q8LAW2|AFR_ARATH F-box protein AFR OS=Arabidopsis thaliana OX=3702 GN=AFR PE=1 SV=2 PF01344:Kelch motif	Kelch_1
BjuVA10G21120	1.28866	-2.18409	-	-	Q8VYW2|BAM9_ARATH Inactive beta-amylase 9 OS=Arabidopsis thaliana OX=3702 GN=BAM9 PE=2 SV=1 PF01373:Glycosyl hydrolase family 14	-
BjuVA08G30140	-3.21251	-	1.23533	-2.89948	Q9FXH5|PUP14_ARATH Purine permease 14 OS=Arabidopsis thaliana OX=3702 GN=PUP14 PE=1 SV=1 PF16913:Purine nucleobase transmembrane transport	-
BjuVA08G27190	-1.07218	-	-	-	-	-
BjuVA09G47160	2.63989	-	-	-	-	-
BjuVA09G26150	-1.03065	-	-	-	Q9FZ45|Y1686_ARATH Uncharacterized membrane protein At1g16860 OS=Arabidopsis thaliana OX=3702 GN=At1g16860 PE=1 SV=1 -	-
BjuVB04G12520	1.04556	-	-	-	P49209|RL91_ARATH 60S ribosomal protein L9-1 OS=Arabidopsis thaliana OX=3702 GN=RPL9B PE=1 SV=3 PF00347:Ribosomal protein L6	-
BjuVB03G39480	-1.46801	-	-	-	Q9C9M8|DTX9_ARATH Protein DETOXIFICATION 9 OS=Arabidopsis thaliana OX=3702 GN=DTX9 PE=2 SV=1 PF01554:MatE	MatE
BjuVA01G10610	-1.50773	-	1.05373	-	-	-
BjuVA06G17460	1.64975	-	-	-	Q9LPK6|AEE9_ARATH Probable acyl-activating enzyme 9 OS=Arabidopsis thaliana OX=3702 GN=AEE9 PE=2 SV=1 PF00501:AMP-binding enzyme|PF13193:AMP-binding enzyme C-terminal domain	AMP-binding
BjuVB05G20090	1.44415	-	-	-	A4QND5|NIP7_XENTR 60S ribosome subunit biogenesis protein NIP7 homolog OS=Xenopus tropicalis OX=8364 GN=nip7 PE=2 SV=1 PF03657:UPF0113 PUA domain|PF17833:UPF0113 Pre-PUA domain	-
BjuVB02G44560	1.10175	-	-	-	Q9LZR5|HDT3_ARATH Histone deacetylase HDT3 OS=Arabidopsis thaliana OX=3702 GN=HDT3 PE=1 SV=2 PF17800:Nucleoplasmin-like domain	-
BjuVB07G25360	1.00909	-	-	-	Q42340|RS163_ARATH 40S ribosomal protein S16-3 OS=Arabidopsis thaliana OX=3702 GN=RPS16C PE=2 SV=1 PF00380:Ribosomal protein S9/S16	-
BjuVB04G22240	-1.65167	-	-	-	Q9XF92|BRH1_ARATH Brassinosteroid-responsive RING protein 1 OS=Arabidopsis thaliana OX=3702 GN=BRH1 PE=2 SV=1 PF13639:Ring finger domain	-
BjuV_Contig01043G00150	2.21263	-	-	2.00492	Q9SRM5|CPR49_ARATH GDSL esterase/lipase CPRD49 OS=Arabidopsis thaliana OX=3702 GN=CPRD49 PE=2 SV=1 PF13472:GDSL-like Lipase/Acylhydrolase family	-
BjuVA09G36820	1.10668	1.99599	2.14272	3.01854	Q00326|MYRO_BRANA Myrosinase OS=Brassica napus OX=3708 PE=2 SV=1 PF00232:Glycosyl hydrolase family 1	Glyco_hydro_1
BjuVA09G65210	1.09552	-	-	-	F4I114|Y1960_ARATH Probable serine/threonine-protein kinase At1g09600 OS=Arabidopsis thaliana OX=3702 GN=At1g09600 PE=3 SV=1 PF00069:Protein kinase domain|PF01157:Ribosomal protein L21e	Pkinase
BjuVB06G40940	-1.20241	-	-	-	Q9S7H8|ICS1_ARATH Isochorismate synthase 1, chloroplastic OS=Arabidopsis thaliana OX=3702 GN=ICS1 PE=1 SV=2 PF00425:chorismate binding enzyme	-
BjuVA03G10580	-2.11024	1.68283	-	-	Q9FMR3|NAC90_ARATH NAC domain-containing protein 90 OS=Arabidopsis thaliana OX=3702 GN=NAC090 PE=1 SV=1 PF02365:No apical meristem (NAM) protein	NAM
BjuVA08G30640	1.02868	-	-	-	Q8LC68|NRP2_ARATH NAP1-related protein 2 OS=Arabidopsis thaliana OX=3702 GN=NRP2 PE=1 SV=2 PF00956:Nucleosome assembly protein (NAP)	-
BjuVA02G46000	-1.92669	-	-	-	O65404|ERG11_ARATH Squalene epoxidase 5 OS=Arabidopsis thaliana OX=3702 GN=SQE5 PE=2 SV=2 PF08491:Squalene epoxidase	-
BjuVA02G16530	-1.56761	-	-	-1.88553	Q9LTE2|HIP13_ARATH Heavy metal-associated isoprenylated plant protein 13 OS=Arabidopsis thaliana OX=3702 GN=HIPP13 PE=2 SV=1 -	-
BjuVB03G29360	1.84938	-	-2.30725	-3.20877	O48700|PUB6_ARATH U-box domain-containing protein 6 OS=Arabidopsis thaliana OX=3702 GN=PUB6 PE=2 SV=2 PF04564:U-box domain	U-box
BjuVB08G01090	1.32139	-	1.62863	2.46076	F4JZC2|ENAS1_ARATH Cytosolic endo-beta-N-acetylglucosaminidase 1 OS=Arabidopsis thaliana OX=3702 GN=ENGASE1 PE=1 SV=1 PF03644:Glycosyl hydrolase family 85	-
BjuVA09G07980	1.15988	-	-	-	Q9FMK9|PPA29_ARATH Probable inactive purple acid phosphatase 29 OS=Arabidopsis thaliana OX=3702 GN=PAP29 PE=2 SV=1 PF00149:Calcineurin-like phosphoesterase	Metallophos
BjuVB07G06810	-2.27341	-	-	2.72931	Q93XX4|C2D61_ARATH C2 domain-containing protein At1g53590 OS=Arabidopsis thaliana OX=3702 GN=NTMC2T6.1 PE=1 SV=2 PF00168:C2 domain	C2
BjuVA02G11730	-3.01292	-	-	-2.49116	Q940T5|RDUF2_ARATH E3 ubiquitin-protein ligase RDUF2 OS=Arabidopsis thaliana OX=3702 GN=DURF2 PE=1 SV=1 PF13639:Ring finger domain|PF06547:Protein of unknown function (DUF1117)|PF14369:zinc-ribbon	-
BjuVA01G42930	-1.26037	-	-	-	Q93W32|FLA18_ARATH Fasciclin-like arabinogalactan protein 18 OS=Arabidopsis thaliana OX=3702 GN=FLA18 PE=2 SV=1 PF02469:Fasciclin domain	-
BjuVB06G39210	1.10154	-	-	-	Q9C6I8|NOG1_ARATH Nucleolar GTP-binding protein 1 OS=Arabidopsis thaliana OX=3702 GN=At1g50920 PE=2 SV=1 PF06858:Nucleolar GTP-binding protein 1 (NOG1)|PF08155:NOGCT (NUC087) domain|PF17835:NOG1 N-terminal helical domain	-
BjuVB03G44350	2.2443	2.51879	-	-	Q9ZUZ6|WTF9_ARATH Protein WHAT'S THIS FACTOR 9, mitochondrial OS=Arabidopsis thaliana OX=3702 GN=WTF9 PE=4 SV=1 PF11955:Plant organelle RNA recognition domain	-
BjuVA10G30330	-1.08725	-	-1.73479	-	Q9FG13|CXE15_ARATH Probable carboxylesterase 15 OS=Arabidopsis thaliana OX=3702 GN=CXE15 PE=2 SV=1 PF07859:alpha/beta hydrolase fold	Abhydrolase_3
BjuVB06G04770	1.12694	1.10788	-	-	F4IH25|BOP1_ARATH Ribosome biogenesis protein BOP1 homolog OS=Arabidopsis thaliana OX=3702 GN=BOP1 PE=1 SV=1 PF08145:BOP1NT (NUC169) domain|PF00400:WD domain, G-beta repeat	WD40
BjuVA06G32720	-1.31212	-	-	-	-	-
BjuVA08G31020	1.03695	-	-	-	Q39336|GBLP_BRANA Guanine nucleotide-binding protein subunit beta-like protein OS=Brassica napus OX=3708 GN=GB1 PE=2 SV=1 PF00400:WD domain, G-beta repeat	WD40
BjuVB01G37730	1.86761	-	-	-	P27483|GRP1_ARATH Glycine-rich cell wall structural protein OS=Arabidopsis thaliana OX=3702 GN=At3g17050 PE=3 SV=2 -	-
BjuVA06G01390	-1.20092	-	-	-	Q9C826|ABA2_ARATH Xanthoxin dehydrogenase OS=Arabidopsis thaliana OX=3702 GN=ABA2 PE=1 SV=1 PF13561:Enoyl-(Acyl carrier protein) reductase	-
BjuVB03G07490	1.2501	1.32127	-	-	Q8LC68|NRP2_ARATH NAP1-related protein 2 OS=Arabidopsis thaliana OX=3702 GN=NRP2 PE=1 SV=2 PF00956:Nucleosome assembly protein (NAP)	-
BjuVB08G06430	1.24462	-	-	-	Q9ZNT1|NB5R1_ARATH NADH--cytochrome b5 reductase 1 OS=Arabidopsis thaliana OX=3702 GN=CBR1 PE=1 SV=1 PF00175:Oxidoreductase NAD-binding domain|PF00970:Oxidoreductase FAD-binding domain	FAD_binding_6
BjuVB05G09100	1.27979	-	-	-	-	-
BjuV_Contig01019_ERROPOS2684367G00270	1.0245	-	-	-	Q93VT9|RL101_ARATH 60S ribosomal protein L10-1 OS=Arabidopsis thaliana OX=3702 GN=RPL10A PE=1 SV=1 PF00252:Ribosomal protein L16p/L10e	-
BjuVB02G73250	-1.21807	-	-	-	-	-
BjuVB08G02390	-1.43921	-	-	-	Q38967|AAP2_ARATH Amino acid permease 2 OS=Arabidopsis thaliana OX=3702 GN=AAP2 PE=1 SV=1 PF01490:Transmembrane amino acid transporter protein	Aa_trans
BjuVB06G19770	1.05656	-	-	-	O04341|GRXS9_ARATH Monothiol glutaredoxin-S9 OS=Arabidopsis thaliana OX=3702 GN=GRXS9 PE=1 SV=1 PF00462:Glutaredoxin	-
BjuVA02G11920	-1.52556	-1.37766	-	-	-	-
BjuVA10G09160	3.28836	-	-	-	Q9LU47|PUB53_ARATH Putative U-box domain-containing protein 53 OS=Arabidopsis thaliana OX=3702 GN=PUB53 PE=3 SV=1 PF00582:Universal stress protein family|PF00069:Protein kinase domain|PF04564:U-box domain	Pkinase
BjuVA07G44630	-1.32338	-	-	-	Q8VYA3|WAKLJ_ARATH Wall-associated receptor kinase-like 10 OS=Arabidopsis thaliana OX=3702 GN=WAKL10 PE=2 SV=1 PF00069:Protein kinase domain|PF08488:Wall-associated kinase	Pkinase
BjuVB02G05940	-1.80221	-	-	-	Q9SAE3|C71BS_ARATH Cytochrome P450 71B28 OS=Arabidopsis thaliana OX=3702 GN=CYP71B28 PE=2 SV=1 PF00067:Cytochrome P450	p450
BjuVB01G37130	-1.03805	-	1.10863	1.69014	PF05529:Bap31/Bap29 transmembrane region	-
BjuVA03G32600	-1.21856	-1.88798	-	-1.53232	Q9SRQ1|C89A9_ARATH Cytochrome P450 89A9 OS=Arabidopsis thaliana OX=3702 GN=CYP89A9 PE=2 SV=1 PF00067:Cytochrome P450	p450
BjuVA05G29820	-3.36308	-	-	-3.76583	F4JCB2|CPL5_ARATH RNA polymerase II C-terminal domain phosphatase-like 5 OS=Arabidopsis thaliana OX=3702 GN=CPL5 PE=1 SV=2 PF03031:NLI interacting factor-like phosphatase	NIF
BjuVA09G51460	1.00537	-	-	-	P51423|RL40_BRARP Ubiquitin-60S ribosomal protein L40 OS=Brassica rapa subsp. pekinensis OX=51351 PE=2 SV=2 PF01020:Ribosomal L40e family|PF00240:Ubiquitin family	ubiquitin
BjuVA10G23270	-1.49941	-	1.20349	-	-	-
BjuVA06G48180	2.10479	-	-	-	Q9SZP1|MYB4_ARATH Transcription repressor MYB4 OS=Arabidopsis thaliana OX=3702 GN=MYB4 PE=1 SV=1 PF00249:Myb-like DNA-binding domain	Myb_DNA-binding
BjuVA03G49870	-1.84214	-	-	-	O81445|CNBL1_ARATH Calcineurin B-like protein 1 OS=Arabidopsis thaliana OX=3702 GN=CBL1 PE=1 SV=3 PF13202:EF hand	-
BjuVB04G52320	-1.20172	-	-	1.45117	Q9S7T8|SPZX_ARATH Serpin-ZX OS=Arabidopsis thaliana OX=3702 GN=At1g47710 PE=1 SV=1 PF00079:Serpin (serine protease inhibitor)	Serpin
BjuVB03G08450	-1.01118	-	-	-	Q9LM76|PUB44_ARATH U-box domain-containing protein 44 OS=Arabidopsis thaliana OX=3702 GN=PUB44 PE=1 SV=1 PF04564:U-box domain	U-box
BjuVB08G57460	1.38384	-	-	1.56332	Q5ZK33|LETM1_CHICK Mitochondrial proton/calcium exchanger protein OS=Gallus gallus OX=9031 GN=LETM1 PE=2 SV=1 PF07766:LETM1-like protein	-
BjuVA10G02840	1.03149	-	-	-	P49690|RL23_ARATH 60S ribosomal protein L23 OS=Arabidopsis thaliana OX=3702 GN=RPL23A PE=2 SV=3 PF00238:Ribosomal protein L14p/L23e	-
BjuV_Contig00485G00040	1.12971	-	-	-	O94514|NOP56_SCHPO Nucleolar protein 56 OS=Schizosaccharomyces pombe (strain 972 / ATCC 24843) OX=284812 GN=nop56 PE=3 SV=1 PF01798:snoRNA binding domain, fibrillarin|PF08156:NOP5NT (NUC127) domain	-
BjuVA10G27520	2.74213	4.38771	5.25607	5.05438	Q9FNC1|DTX28_ARATH Protein DETOXIFICATION 28 OS=Arabidopsis thaliana OX=3702 GN=DTX28 PE=3 SV=1 PF01554:MatE	MatE
BjuVB07G30060	-1.48049	-	-	-	Q9LVZ3|ADS32_ARATH Probable lipid desaturase ADS3.2, chloroplastic OS=Arabidopsis thaliana OX=3702 GN=ADS3.2 PE=2 SV=3 PF00487:Fatty acid desaturase	-
BjuVA09G18830	1.40696	-	-	1.58493	Q9FVS9|C96AF_ARATH Alkane hydroxylase MAH1 OS=Arabidopsis thaliana OX=3702 GN=CYP96A15 PE=2 SV=1 PF00067:Cytochrome P450	p450
BjuVA03G13080	1.14251	-	-	-	P51420|RL313_ARATH 60S ribosomal protein L31-3 OS=Arabidopsis thaliana OX=3702 GN=RPL31C PE=3 SV=2 PF01198:Ribosomal protein L31e	Ribosomal_L31e
BjuV_Contig00272G00170	1.06482	1.12873	-	-	Q9C8Z4|HEAT1_ARATH Uncharacterized protein At3g06530 OS=Arabidopsis thaliana OX=3702 GN=At3g06530 PE=1 SV=3 PF08146:BP28CT (NUC211) domain|PF12397:U3 small nucleolar RNA-associated protein 10	-
BjuVB02G73760	-1.112	-	-	-	Q9ZT49|ATL45_ARATH Probable E3 ubiquitin-protein ligase ATL45 OS=Arabidopsis thaliana OX=3702 GN=ATL45 PE=1 SV=1 PF13639:Ring finger domain	-
BjuVB03G48440	-1.0499	-	-	-	O24332|DEF3_RAPSA Defensin-like protein 3 OS=Raphanus sativus OX=3726 GN=AFP3 PE=3 SV=1 -	-
BjuVB02G43300	1.77554	1.81185	-	-	-	-
BjuVB06G57560	-1.71885	-	-	1.41078	Q9SAL0|RGLG4_ARATH E3 ubiquitin-protein ligase RGLG4 OS=Arabidopsis thaliana OX=3702 GN=RGLG4 PE=1 SV=1 PF07002:Copine|PF13920:Zinc finger, C3HC4 type (RING finger)	-
BjuVA05G35870	1.26741	-	-	2.15149	Q9LIC6|PR1F3_ARATH PRA1 family protein F3 OS=Arabidopsis thaliana OX=3702 GN=PRA1F3 PE=1 SV=1 PF03208:PRA1 family protein	-
BjuVA01G00780	2.5503	-5.4529	-5.54469	-4.46511	Q96348|INO1_BRANA Inositol-3-phosphate synthase OS=Brassica napus OX=3708 PE=2 SV=2 PF07994:Myo-inositol-1-phosphate synthase|PF01658:Myo-inositol-1-phosphate synthase	-
BjuVB05G51840	-1.95432	1.86164	1.92692	2.12025	Q9LMM5|MPK11_ARATH Mitogen-activated protein kinase 11 OS=Arabidopsis thaliana OX=3702 GN=MPK11 PE=1 SV=1 PF00069:Protein kinase domain	Pkinase
BjuVB01G18500	1.28793	-	-	-	Q501D8|C79B3_ARATH Tryptophan N-monooxygenase 2 OS=Arabidopsis thaliana OX=3702 GN=CYP79B3 PE=1 SV=1 PF00067:Cytochrome P450	p450
BjuVA06G22620	-1.10719	-	-	-	-	-
BjuVB07G36830	1.09269	-	-	-	PF05514:HR-like lesion-inducing	-
BjuVB08G06710	1.43735	-	-	-	Q8VZT0|NLAL1_ARATH Putative H/ACA ribonucleoprotein complex subunit 1-like protein 1 OS=Arabidopsis thaliana OX=3702 GN=At3g03920 PE=2 SV=1 PF04410:Gar1/Naf1 RNA binding region	-
BjuVB07G27250	-1.36499	-	-1.50277	-	Q9SNQ6|HD3B_ORYSJ Protein HEADING DATE 3B OS=Oryza sativa subsp. japonica OX=39947 GN=HD3B PE=2 SV=1 -	-
BjuVA07G29610	-1.24867	-	-	-1.70517	Q9CA71|FUT3_ARATH Fucosyltransferase 3 OS=Arabidopsis thaliana OX=3702 GN=FUT3 PE=2 SV=3 PF03254:Xyloglucan fucosyltransferase	-
BjuVA07G22610	-1.08388	-	-	-	Q01667|CAB6_ARATH Chlorophyll a-b binding protein 6, chloroplastic OS=Arabidopsis thaliana OX=3702 GN=LHCA1 PE=1 SV=1 PF00504:Chlorophyll A-B binding protein	-
BjuVB06G25010	-1.02104	1.17616	1.54529	1.43864	PF08241:Methyltransferase domain	Methyltransf_11
BjuVB02G70570	-3.99775	-	-	-2.57983	PF13359:DDE superfamily endonuclease	-
BjuVB03G11100	1.06107	-	-	-	Q9M0E2|RL282_ARATH 60S ribosomal protein L28-2 OS=Arabidopsis thaliana OX=3702 GN=RPL28C PE=2 SV=1 PF01778:Ribosomal L28e protein family	-
BjuVB05G36980	-2.6109	-	-	-1.57114	Q9FMS6|CAF1K_ARATH Probable CCR4-associated factor 1 homolog 11 OS=Arabidopsis thaliana OX=3702 GN=CAF1-11 PE=2 SV=1 PF04857:CAF1 family ribonuclease	CAF1
BjuVB07G21010	-1.13109	1.01173	1.48962	1.47068	F4K2R6|CB60G_ARATH Calmodulin-binding protein 60 G OS=Arabidopsis thaliana OX=3702 GN=CBP60G PE=1 SV=1 PF07887:Calmodulin binding protein-like	-
BjuVB03G33600	-1.12382	-	-	1.95284	Q9MAM1|CIPK9_ARATH CBL-interacting serine/threonine-protein kinase 9 OS=Arabidopsis thaliana OX=3702 GN=CIPK9 PE=1 SV=2 PF00069:Protein kinase domain|PF03822:NAF domain	Pkinase
BjuVA05G12120	-3.75631	-	-	-	O49325|RLP28_ARATH Receptor like protein 28 OS=Arabidopsis thaliana OX=3702 GN=RLP28 PE=2 SV=2 PF13855:Leucine rich repeat	-
BjuVA10G10460	-1.33264	-	-	-1.47514	-	-
BjuVA09G50350	-1.13561	-	-	-	F4JBM4|RBL4_ARATH RHOMBOID-like protein 4 OS=Arabidopsis thaliana OX=3702 GN=RBL4 PE=2 SV=1 PF01694:Rhomboid family	Rhomboid
BjuVA05G13440	1.09165	1.08948	-	-	Q9SKC1|U74C1_ARATH UDP-glycosyltransferase 74C1 OS=Arabidopsis thaliana OX=3702 GN=UGT74C1 PE=2 SV=1 PF00201:UDP-glucoronosyl and UDP-glucosyl transferase	UDPGT
BjuVA10G26890	1.0611	-	-	-	Q56XG6|RH15_ARATH DEAD-box ATP-dependent RNA helicase 15 OS=Arabidopsis thaliana OX=3702 GN=RH15 PE=1 SV=3 PF00271:Helicase conserved C-terminal domain|PF00270:DEAD/DEAH box helicase	DEAD
BjuVB05G07840	-4.06629	-	-	-2.9324	PF13359:DDE superfamily endonuclease	-
BjuVB03G34100	1.2151	-	-	-	Q9FZ22|GPAT2_ARATH Probable glycerol-3-phosphate acyltransferase 2 OS=Arabidopsis thaliana OX=3702 GN=GPAT2 PE=2 SV=1 PF01553:Acyltransferase	Acyltransferase
BjuVA09G27470	-2.28624	-	-	-2.39141	Q9FHE1|GSTT3_ARATH Glutathione S-transferase T3 OS=Arabidopsis thaliana OX=3702 GN=GSTT3 PE=2 SV=1 -	-
BjuVA07G03690	-1.32898	-	-	-	Q9SII6|PIX13_ARATH Probable serine/threonine-protein kinase PIX13 OS=Arabidopsis thaliana OX=3702 GN=PIX13 PE=1 SV=2 PF07714:Protein tyrosine and serine/threonine kinase	Pkinase_Tyr
BjuVA07G31190	-1.48195	-	-	-	P0DH86|SRK_ARATH G-type lectin S-receptor-like serine/threonine-protein kinase SRK OS=Arabidopsis thaliana OX=3702 GN=SRK PE=2 SV=1 PF07714:Protein tyrosine and serine/threonine kinase	Pkinase_Tyr
BjuV_Contig00578G00060	-1.55914	-	1.66584	-	-	-
BjuVA03G62960	-1.36431	-	1.04737	-	Q9ZT49|ATL45_ARATH Probable E3 ubiquitin-protein ligase ATL45 OS=Arabidopsis thaliana OX=3702 GN=ATL45 PE=1 SV=1 PF13639:Ring finger domain	-
BjuVA03G44710	1.30087	-	-	-	Q43295|APK1_ARATH Adenylyl-sulfate kinase 1, chloroplastic OS=Arabidopsis thaliana OX=3702 GN=APK1 PE=1 SV=1 PF01583:Adenylylsulphate kinase	-
BjuVA04G01100	-1.53444	-	-	-	Q9ZRP7|SLD1_ARATH Delta(8)-fatty-acid desaturase 1 OS=Arabidopsis thaliana OX=3702 GN=SLD1 PE=1 SV=1 PF00487:Fatty acid desaturase|PF00173:Cytochrome b5-like Heme/Steroid binding domain	-
BjuVB03G57460	1.32737	1.45763	-	-	O13878|UTP17_SCHPO U3 small nucleolar RNA-associated protein 17 OS=Schizosaccharomyces pombe (strain 972 / ATCC 24843) OX=284812 GN=utp17 PE=3 SV=3 -	-
BjuVA08G27150	1.12946	-	-	1.96506	Q42565|ASB1_ARATH Anthranilate synthase beta subunit 1, chloroplastic OS=Arabidopsis thaliana OX=3702 GN=ASB1 PE=1 SV=1 PF00117:Glutamine amidotransferase class-I	GATase
BjuVB07G06730	-1.09507	-	-	-	Q9LRR7|NCED3_ARATH 9-cis-epoxycarotenoid dioxygenase NCED3, chloroplastic OS=Arabidopsis thaliana OX=3702 GN=NCED3 PE=1 SV=1 PF03055:Retinal pigment epithelial membrane protein	RPE65
BjuVB08G13760	1.16822	-	-	-	Q84JK8|MAKR6_ARATH Probable membrane-associated kinase regulator 6 OS=Arabidopsis thaliana OX=3702 GN=MAKR6 PE=2 SV=1 -	-
BjuVA04G23920	1.25633	1.32163	-	1.68604	O25225|BIPA_HELPY 50S ribosomal subunit assembly factor BipA OS=Helicobacter pylori (strain ATCC 700392 / 26695) OX=85962 GN=bipA PE=3 SV=1 PF03144:Elongation factor Tu domain 2|PF00679:Elongation factor G C-terminus|PF00009:Elongation factor Tu GTP binding domain	GTP_EFTU
BjuVA06G37110	1.02178	-	-	-	B9DGI8|BZP63_ARATH Basic leucine zipper 63 OS=Arabidopsis thaliana OX=3702 GN=BZIP63 PE=1 SV=1 PF00170:bZIP transcription factor|PF12498:Basic leucine-zipper C terminal	bZIP_1
BjuVB01G00700	1.16487	1.71521	1.21442	1.79259	Q9ZNV4|CYB5C_ARATH Cytochrome B5 isoform C OS=Arabidopsis thaliana OX=3702 GN=CYTB5-C PE=1 SV=1 PF00173:Cytochrome b5-like Heme/Steroid binding domain	-
BjuVA04G02380	-1.35696	-	1.05286	-	B9DFG5|PTI13_ARATH PTI1-like tyrosine-protein kinase 3 OS=Arabidopsis thaliana OX=3702 GN=PTI13 PE=1 SV=1 PF07714:Protein tyrosine and serine/threonine kinase	Pkinase_Tyr
BjuVB03G19080	-1.62145	-	-	-	Q39234|TGA3_ARATH Transcription factor TGA3 OS=Arabidopsis thaliana OX=3702 GN=TGA3 PE=1 SV=1 PF00170:bZIP transcription factor|PF14144:Seed dormancy control	bZIP_1
BjuVA01G39840	-1.39234	-	-	-1.67712	P82869|CYP37_ARATH Peptidyl-prolyl cis-trans isomerase CYP37, chloroplastic OS=Arabidopsis thaliana OX=3702 GN=CYP37 PE=1 SV=3 PF08241:Methyltransferase domain	Methyltransf_11
BjuVA06G32280	-1.06716	-	-	-	Q9ZPW3|HBI1_ARATH Transcription factor HBI1 OS=Arabidopsis thaliana OX=3702 GN=HBI1 PE=1 SV=3 -	-
BjuVA07G34810	-1.07262	-	-	-	Q9S7U5|HSFA8_ARATH Heat stress transcription factor A-8 OS=Arabidopsis thaliana OX=3702 GN=HSFA8 PE=2 SV=1 PF00447:HSF-type DNA-binding	HSF_DNA-bind
BjuVA05G05970	-1.56606	-	-	-	-	-
BjuVA08G12820	-1.46961	2.4253	2.87144	3.11755	Q84WT8|CYT4_ARATH Cysteine proteinase inhibitor 4 OS=Arabidopsis thaliana OX=3702 GN=CYS4 PE=3 SV=2 PF16845:Aspartic acid proteinase inhibitor	-
BjuVA02G19210	1.04265	-	-	-	P51413|RL172_ARATH 60S ribosomal protein L17-2 OS=Arabidopsis thaliana OX=3702 GN=RPL17B PE=2 SV=2 PF00237:Ribosomal protein L22p/L17e	-
BjuVA05G10870	3.5862	-	-	-	P51418|R18A2_ARATH 60S ribosomal protein L18a-2 OS=Arabidopsis thaliana OX=3702 GN=RPL18AB PE=1 SV=2 PF01176:Translation initiation factor 1A / IF-1	-
BjuVB08G11650	1.2201	-	-	-	P51420|RL313_ARATH 60S ribosomal protein L31-3 OS=Arabidopsis thaliana OX=3702 GN=RPL31C PE=3 SV=2 PF01198:Ribosomal protein L31e	Ribosomal_L31e
BjuVA06G46330	-1.041	-	-	-2.76373	Q9FI17|ARAE4_ARATH Putative UDP-arabinose 4-epimerase 4 OS=Arabidopsis thaliana OX=3702 GN=At5g44480 PE=3 SV=1 PF16363:GDP-mannose 4,6 dehydratase	-
BjuVA05G41610	1.07606	1.42819	-	-	Q9C8Z4|HEAT1_ARATH Uncharacterized protein At3g06530 OS=Arabidopsis thaliana OX=3702 GN=At3g06530 PE=1 SV=3 PF12397:U3 small nucleolar RNA-associated protein 10|PF08146:BP28CT (NUC211) domain	-
BjuVA09G43920	-1.92193	-	-	-2.91727	PF14009:Domain of unknown function (DUF4228)	-
BjuVB05G19300	1.36687	-	-	-	F4JMJ1|HSP7R_ARATH Heat shock 70 kDa protein 17 OS=Arabidopsis thaliana OX=3702 GN=HSP70-17 PE=2 SV=1 PF00012:Hsp70 protein	HSP70
BjuVA02G42430	2.46086	-	2.52142	-	Q940V4|C85A2_ARATH Cytochrome P450 85A2 OS=Arabidopsis thaliana OX=3702 GN=CYP85A2 PE=2 SV=1 PF00067:Cytochrome P450	p450
BjuVA04G27680	1.51979	-	-	-	Q9CAX6|RS142_ARATH 40S ribosomal protein S14-2 OS=Arabidopsis thaliana OX=3702 GN=RPS14B PE=1 SV=1 PF01020:Ribosomal L40e family|PF00411:Ribosomal protein S11|PF00240:Ubiquitin family	ubiquitin
BjuVA03G17670	1.03233	-	-	-	Q9SKZ3|RS122_ARATH 40S ribosomal protein S12-2 OS=Arabidopsis thaliana OX=3702 GN=RPS12C PE=1 SV=1 PF01248:Ribosomal protein L7Ae/L30e/S12e/Gadd45 family	-
BjuVA08G11000	-2.23416	-	-	-	-	-
BjuVB04G33760	-1.10941	-	-	-	Q39234|TGA3_ARATH Transcription factor TGA3 OS=Arabidopsis thaliana OX=3702 GN=TGA3 PE=1 SV=1 PF14144:Seed dormancy control	-
BjuVB03G08670	-1.82823	-	1.16601	2.57146	G0S8G9|IF2P_CHATD Eukaryotic translation initiation factor 5B OS=Chaetomium thermophilum (strain DSM 1495 / CBS 144.50 / IMI 039719) OX=759272 GN=CTHT_0029840 PE=1 SV=2 PF00009:Elongation factor Tu GTP binding domain|PF03144:Elongation factor Tu domain 2|PF11987:Translation-initiation factor 2	GTP_EFTU
BjuVA09G62440	-1.66581	-	-	-	Q9XI80|FUT6_ARATH Fucosyltransferase 6 OS=Arabidopsis thaliana OX=3702 GN=FUT6 PE=2 SV=1 PF03254:Xyloglucan fucosyltransferase	-
BjuVB04G30410	1.4827	1.60099	-	-	Q9FZ80|SOT17_ARATH Cytosolic sulfotransferase 17 OS=Arabidopsis thaliana OX=3702 GN=SOT17 PE=1 SV=1 PF00685:Sulfotransferase domain	Sulfotransfer_1
BjuVB07G39010	-3.12514	-	-	-2.00588	-	-
BjuVB02G37960	-1.08589	-	-	-	Q945Q1|CYT1_ARATH Cysteine proteinase inhibitor 1 OS=Arabidopsis thaliana OX=3702 GN=CYS1 PE=1 SV=2 PF16845:Aspartic acid proteinase inhibitor	-
BjuVA06G38280	1.18634	1.30998	2.3545	3.67108	Q93XW5|NSP5_ARATH Nitrile-specifier protein 5 OS=Arabidopsis thaliana OX=3702 GN=NSP5 PE=2 SV=1 PF13964:Kelch motif|PF13418:Galactose oxidase, central domain|PF01344:Kelch motif	Kelch_1
BjuVA09G35150	1.0895	-	-	-	Q9SHF3|AGO2_ARATH Protein argonaute 2 OS=Arabidopsis thaliana OX=3702 GN=AGO2 PE=1 SV=1 PF16488:Argonaute linker 2 domain|PF08699:Argonaute linker 1 domain|PF02170:PAZ domain|PF02171:Piwi domain|PF16486:N-terminal domain of argonaute	Piwi
BjuVB06G11730	-1.10563	-	-	-	Q9LV16|B3GTJ_ARATH Hydroxyproline O-galactosyltransferase GALT6 OS=Arabidopsis thaliana OX=3702 GN=GALT6 PE=2 SV=2 PF00337:Galactoside-binding lectin|PF01762:Galactosyltransferase	Galactosyl_T
BjuVB07G11990	1.52317	-	-	-	-	-
BjuVB07G26310	-1.04568	-	-1.05976	-	F4JWM0|DSC2_ARATH Disease resistance-like protein DSC2 OS=Arabidopsis thaliana OX=3702 GN=DSC2 PE=1 SV=1 PF00931:NB-ARC domain|PF01582:TIR domain	TIR
BjuVB02G38940	-3.3856	-	-	-6.21565	Q9LEU7|CIPK5_ARATH CBL-interacting serine/threonine-protein kinase 5 OS=Arabidopsis thaliana OX=3702 GN=CIPK5 PE=1 SV=1 PF00069:Protein kinase domain|PF03822:NAF domain	Pkinase
BjuVB07G12010	1.10146	-	-	-	Q9LIK0|PKP1_ARATH Plastidial pyruvate kinase 1, chloroplastic OS=Arabidopsis thaliana OX=3702 GN=PKP1 PE=1 SV=1 PF02887:Pyruvate kinase, alpha/beta domain|PF00224:Pyruvate kinase, barrel domain	PK
BjuVB02G62350	-1.03396	-	-	1.10929	Q9S7P9|SNP33_ARATH SNAP25 homologous protein SNAP33 OS=Arabidopsis thaliana OX=3702 GN=SNAP33 PE=1 SV=1 -	-
BjuVA03G21800	-1.38017	-	-	-	PF04720:PDDEXK-like family of unknown function	-
BjuVB07G19500	-1.65102	-	-	1.72795	-	-
BjuVB05G02850	-2.44588	-	-2.23001	-	Q84WE9|LHTL7_ARATH Lysine histidine transporter-like 7 OS=Arabidopsis thaliana OX=3702 GN=At4g35180 PE=2 SV=2 PF01490:Transmembrane amino acid transporter protein	Aa_trans
BjuVB02G23310	-1.163	-	-	-	Q9FIU5|CRLK1_ARATH Calcium/calmodulin-regulated receptor-like kinase 1 OS=Arabidopsis thaliana OX=3702 GN=CRLK1 PE=1 SV=1 PF07714:Protein tyrosine and serine/threonine kinase	Pkinase_Tyr
BjuVA04G31250	-1.9221	-	-	-	O80683|CAB25_ARATH Calmodulin-binding protein 25 OS=Arabidopsis thaliana OX=3702 GN=CAMBP25 PE=1 SV=1 PF05678:VQ motif	-
BjuVA06G47400	1.2379	-2.2656	-4.92322	-4.83358	A1T3J8|Y910_MYCVP Putative S-adenosyl-L-methionine-dependent methyltransferase Mvan_0910 OS=Mycolicibacterium vanbaalenii (strain DSM 7251 / JCM 13017 / BCRC 16820 / KCTC 9966 / NRRL B-24157 / PYR-1) OX=350058 GN=Mvan_0910 PE=3 SV=1 PF04072:Leucine carboxyl methyltransferase	-
BjuVA07G03220	-1.10665	-	-	-	-	-
BjuVA03G19540	1.26493	-	-	-	Q9CAX6|RS142_ARATH 40S ribosomal protein S14-2 OS=Arabidopsis thaliana OX=3702 GN=RPS14B PE=1 SV=1 PF00411:Ribosomal protein S11	-
BjuVB01G42450	-1.33716	-	-	-	Q9ZSD4|SY121_ARATH Syntaxin-121 OS=Arabidopsis thaliana OX=3702 GN=SYP121 PE=1 SV=1 PF05739:SNARE domain|PF00804:Syntaxin	SNARE
BjuVA02G07130	1.16825	1.18523	-	-	Q9CAU1|SCP3_ARATH Serine carboxypeptidase-like 3 OS=Arabidopsis thaliana OX=3702 GN=SCPL3 PE=2 SV=1 PF00450:Serine carboxypeptidase	Peptidase_S10
BjuVB03G40280	1.11716	-	-	-	Q8L9C4|KCR1_ARATH Very-long-chain 3-oxoacyl-CoA reductase 1 OS=Arabidopsis thaliana OX=3702 GN=KCR1 PE=1 SV=1 PF00106:short chain dehydrogenase	adh_short
BjuVB02G56810	1.4002	-	-2.13449	-2.17521	Q9FJ07|MY111_ARATH Transcription factor MYB111 OS=Arabidopsis thaliana OX=3702 GN=MYB111 PE=1 SV=1 PF00249:Myb-like DNA-binding domain	Myb_DNA-binding
BjuV_Contig00683G00550	-1.57581	1.47865	1.00844	-	Q9SVC2|SY122_ARATH Syntaxin-122 OS=Arabidopsis thaliana OX=3702 GN=SYP122 PE=1 SV=1 PF05739:SNARE domain|PF00804:Syntaxin	SNARE
BjuVB05G28730	2.08412	-	2.15349	-	-	-
BjuVA03G58320	1.4027	-	-1.54031	-2.0412	-	-
BjuVA03G20860	-1.29614	-	-	-	O80915|PR1B4_ARATH PRA1 family protein B4 OS=Arabidopsis thaliana OX=3702 GN=PRA1B4 PE=1 SV=1 PF03208:PRA1 family protein	-
BjuVB08G56500	-1.28039	-	-1.19667	-	F4J3G5|CTPA3_ARATH Carboxyl-terminal-processing peptidase 3, chloroplastic OS=Arabidopsis thaliana OX=3702 GN=CTPA3 PE=3 SV=1 PF03572:Peptidase family S41|PF17820:PDZ domain	Peptidase_S41
BjuVB02G12140	1.28508	-	-	-	B6IRQ7|RL4_RHOCS 50S ribosomal protein L4 OS=Rhodospirillum centenum (strain ATCC 51521 / SW) OX=414684 GN=rplD PE=3 SV=1 PF00573:Ribosomal protein L4/L1 family	-
BjuVA04G19800	1.0856	-	-	-	Q93ZE8|SDF2_ARATH Stromal cell-derived factor 2-like protein OS=Arabidopsis thaliana OX=3702 GN=SDF2 PE=1 SV=1 PF02815:MIR domain	-
BjuVB07G34580	1.00372	-	-	-	P49211|RL321_ARATH 60S ribosomal protein L32-1 OS=Arabidopsis thaliana OX=3702 GN=RPL32A PE=2 SV=2 PF01655:Ribosomal protein L32	-
BjuVA07G35100	-2.63224	-	-	-	PF07797:Protein of unknown function (DUF1639)	-
BjuVB03G35310	-1.24512	1.50539	-	-	Q9SSL9|PEPR1_ARATH Leucine-rich repeat receptor-like protein kinase PEPR1 OS=Arabidopsis thaliana OX=3702 GN=PEPR1 PE=1 SV=1 PF08263:Leucine rich repeat N-terminal domain|PF13855:Leucine rich repeat|PF00069:Protein kinase domain	Pkinase
BjuVB03G14240	1.3881	-	-	-	Q940J1|ATB16_ARATH Homeobox-leucine zipper protein ATHB-16 OS=Arabidopsis thaliana OX=3702 GN=ATHB-16 PE=2 SV=2 PF00046:Homeodomain|PF02183:Homeobox associated leucine zipper	HALZ
BjuVA04G25370	2.02798	-	-4.08788	-6.66782	Q84MD6|DSP2_ARATH Tyrosine-protein phosphatase DSP2 OS=Arabidopsis thaliana OX=3702 GN=DSP2 PE=1 SV=1 PF03162:Tyrosine phosphatase family	-
BjuVB04G28310	1.09463	-	-	-	O80488|PPR23_ARATH Pentatricopeptide repeat-containing protein At1g09190 OS=Arabidopsis thaliana OX=3702 GN=PCMP-E70 PE=2 SV=1 PF12854:PPR repeat|PF13041:PPR repeat family|PF00025:ADP-ribosylation factor family	Arf
BjuVB03G46950	1.3976	-	-	-	P42730|CLPB1_ARATH Chaperone protein ClpB1 OS=Arabidopsis thaliana OX=3702 GN=CLPB1 PE=1 SV=2 PF07724:AAA domain (Cdc48 subfamily)|PF00004:ATPase family associated with various cellular activities (AAA)|PF02861:Clp amino terminal domain, pathogenicity island component|PF17871:AAA lid domain|PF10431:C-terminal, D2-small domain, of ClpB protein	AAA
BjuVB06G49790	1.00601	-	-	-	P49636|RL40_NICSY Ubiquitin-60S ribosomal protein L40 OS=Nicotiana sylvestris OX=4096 GN=UBICEP52-7 PE=2 SV=2 PF00240:Ubiquitin family|PF01020:Ribosomal L40e family	ubiquitin
BjuVB02G04120	-1.03007	1.15251	-	-	Q9SAC6|GWD1_ARATH Alpha-glucan water dikinase 1, chloroplastic OS=Arabidopsis thaliana OX=3702 GN=GWD1 PE=1 SV=2 PF01326:Pyruvate phosphate dikinase, AMP/ATP-binding domain	-
BjuVA01G29200	-1.18256	-	-	-	Q9C508|PUP18_ARATH Probable purine permease 18 OS=Arabidopsis thaliana OX=3702 GN=PUP18 PE=1 SV=1 PF16913:Purine nucleobase transmembrane transport	-
BjuVB08G11310	-1.11413	-	-	-	Q9LU76|NSTU1_ARATH Nucleotide-sugar uncharacterized transporter 1 OS=Arabidopsis thaliana OX=3702 GN=At5g57100 PE=2 SV=1 PF03151:Triose-phosphate Transporter family	-
BjuVB01G31530	1.26922	-	-	-	Q9LUJ5|EBP2_ARATH Probable rRNA-processing protein EBP2 homolog OS=Arabidopsis thaliana OX=3702 GN=EBP2 PE=1 SV=1 PF05890:Eukaryotic rRNA processing protein EBP2	-
BjuV_Contig00683G00780	-1.21029	-	-	-	Q9SJM6|SAP4_ARATH Zinc finger A20 and AN1 domain-containing stress-associated protein 4 OS=Arabidopsis thaliana OX=3702 GN=SAP4 PE=1 SV=1 PF01754:A20-like zinc finger|PF01428:AN1-like Zinc finger	zf-AN1
BjuVB06G10940	-2.63952	-	-	-	Q9SCK6|NAC62_ARATH NAC domain-containing protein 62 OS=Arabidopsis thaliana OX=3702 GN=NAC062 PE=1 SV=1 PF02365:No apical meristem (NAM) protein	NAM
BjuVB02G72950	-1.87759	3.33537	-	3.47114	Q8L983|COR28_ARATH Cold-regulated protein 28 OS=Arabidopsis thaliana OX=3702 GN=COR28 PE=1 SV=1 -	-
BjuVB03G12360	1.85964	-	-	-	Q94AH9|FBRL2_ARATH rRNA 2'-O-methyltransferase fibrillarin 2 OS=Arabidopsis thaliana OX=3702 GN=FIB2 PE=1 SV=2 PF01269:Fibrillarin	-
BjuVA08G20670	1.337	-2.06197	-2.53228	-2.45433	Q944H5|MTM1_ARATH Mitochondrial carrier protein MTM1 OS=Arabidopsis thaliana OX=3702 GN=MTM1 PE=2 SV=1 PF00153:Mitochondrial carrier protein	Mito_carr
BjuVB04G27910	1.03769	-	-	-	Q43291|RL211_ARATH 60S ribosomal protein L21-1 OS=Arabidopsis thaliana OX=3702 GN=RPL21A PE=2 SV=2 PF01157:Ribosomal protein L21e	-
BjuVB05G19800	3.03884	3.11728	-	-	P27483|GRP1_ARATH Glycine-rich cell wall structural protein OS=Arabidopsis thaliana OX=3702 GN=At3g17050 PE=3 SV=2 -	-
BjuVB02G66510	-1.13288	-	-	-	Q8LJW1|ACR7_ARATH ACT domain-containing protein ACR7 OS=Arabidopsis thaliana OX=3702 GN=ACR7 PE=2 SV=1 PF01842:ACT domain	ACT
BjuVB02G52720	-2.07802	-	-	-	Q9LI84|CML16_ARATH Probable calcium-binding protein CML16 OS=Arabidopsis thaliana OX=3702 GN=CML16 PE=2 SV=2 PF13499:EF-hand domain pair	-
BjuVA03G52850	-1.21608	-	-	-	Q8LJW1|ACR7_ARATH ACT domain-containing protein ACR7 OS=Arabidopsis thaliana OX=3702 GN=ACR7 PE=2 SV=1 PF01842:ACT domain	ACT
BjuVB06G44700	-1.0699	-	1.33853	-	Q9M1Q9|AB21B_ARATH ABC transporter B family member 21 OS=Arabidopsis thaliana OX=3702 GN=ABCB21 PE=1 SV=2 PF00005:ABC transporter|PF00664:ABC transporter transmembrane region	ABC_membrane
BjuVA04G08770	1.27706	-	-	-1.82375	Q9SVM9|CER26_ARATH Protein ECERIFERUM 26 OS=Arabidopsis thaliana OX=3702 GN=CER26 PE=2 SV=1 PF02458:Transferase family	-
BjuVA07G17210	-1.06884	-	-	-	Q39193|SRK2I_ARATH Serine/threonine-protein kinase SRK2I OS=Arabidopsis thaliana OX=3702 GN=SRK2I PE=1 SV=1 PF00069:Protein kinase domain	Pkinase
BjuVA03G07990	-1.79772	-	-	-3.68035	PF14009:Domain of unknown function (DUF4228)	-
BjuVB02G57560	-2.13366	-	-	-2.1886	-	-
BjuVA07G13130	-1.40335	-	1.22475	-2.46029	-	-
BjuVA05G15690	-2.28596	-	-	-	Q9C5V5|GLR28_ARATH Glutamate receptor 2.8 OS=Arabidopsis thaliana OX=3702 GN=GLR2.8 PE=2 SV=2 PF00497:Bacterial extracellular solute-binding proteins, family 3|PF01094:Receptor family ligand binding region|PF00060:Ligand-gated ion channel	ANF_receptor
BjuVB04G28400	-2.53049	-	-	2.30788	O04023|SRC2_ARATH Protein SRC2 homolog OS=Arabidopsis thaliana OX=3702 GN=SRC2 PE=1 SV=1 PF00168:C2 domain	C2
BjuVA06G13210	-1.87151	-	-	-	Q9FZ59|PEPR2_ARATH Leucine-rich repeat receptor-like protein kinase PEPR2 OS=Arabidopsis thaliana OX=3702 GN=PEPR2 PE=1 SV=1 PF13855:Leucine rich repeat|PF00069:Protein kinase domain	Pkinase
BjuVB05G32790	1.00931	-	-	-	P51420|RL313_ARATH 60S ribosomal protein L31-3 OS=Arabidopsis thaliana OX=3702 GN=RPL31C PE=3 SV=2 PF01198:Ribosomal protein L31e	Ribosomal_L31e
BjuV_Contig01033G00100	1.37452	-	-	-	P42791|RL182_ARATH 60S ribosomal protein L18-2 OS=Arabidopsis thaliana OX=3702 GN=RPL18B PE=1 SV=2 PF17135:Ribosomal protein 60S L18 and 50S L18e	-
BjuVB02G63650	-1.13377	-	-	-	O60136|YNS5_SCHPO Uncharacterized WD repeat-containing protein C18H10.05 OS=Schizosaccharomyces pombe (strain 972 / ATCC 24843) OX=284812 GN=SPBC18H10.05 PE=4 SV=1 PF00400:WD domain, G-beta repeat	WD40
BjuVB08G18470	-1.73894	2.28073	2.94348	2.32563	Q84TG3|PUB23_ARATH E3 ubiquitin-protein ligase PUB23 OS=Arabidopsis thaliana OX=3702 GN=PUB23 PE=1 SV=1 PF04564:U-box domain	U-box
BjuVB05G37220	1.2932	-	1.44422	-	-	-
BjuVA09G37870	-2.8077	-	-	-	Q9C5I3|ERF76_ARATH Ethylene-responsive transcription factor 11 OS=Arabidopsis thaliana OX=3702 GN=ERF11 PE=1 SV=1 PF00847:AP2 domain	AP2
BjuVA09G50000	-1.5073	-	1.06312	-	PF08241:Methyltransferase domain	Methyltransf_11
BjuVB08G17050	-1.08628	-	-	-	-	-
BjuVB05G35210	-1.13137	-	-	1.42541	Q9FN94|RLK0_ARATH Receptor-like protein kinase At5g59670 OS=Arabidopsis thaliana OX=3702 GN=At5g59670 PE=1 SV=1 PF12819:Malectin-like domain|PF00069:Protein kinase domain|PF13855:Leucine rich repeat	Pkinase
BjuVA02G21610	-1.75877	-	-	-	PF07816:Protein of unknown function (DUF1645)	-
BjuVA05G44270	-1.6363	-	-	-	Q93ZR8|RRT2_ARATH Rhamnogalacturonan I rhamnosyltransferase 1 OS=Arabidopsis thaliana OX=3702 GN=RRT2 PE=1 SV=1 PF10250:GDP-fucose protein O-fucosyltransferase	-
BjuVA01G37880	1.24759	-	-	-	Q9SCX8|PPA17_ARATH Purple acid phosphatase 17 OS=Arabidopsis thaliana OX=3702 GN=PAP17 PE=2 SV=1 PF00149:Calcineurin-like phosphoesterase	Metallophos
BjuVA06G06730	1.22452	-	-	-	PF07059:Protein of unknown function (DUF1336)	-
BjuVA06G42860	1.20544	-	-	-	Q9ZUL7|DEF01_ARATH Defensin-like protein 1 OS=Arabidopsis thaliana OX=3702 GN=PDF2.3 PE=2 SV=1 PF00304:Gamma-thionin family	-
BjuVB06G44570	1.26573	-	-	-	Q9LZK5|DNJ19_ARATH DnaJ protein ERDJ3B OS=Arabidopsis thaliana OX=3702 GN=ERDJ3B PE=1 SV=1 PF00226:DnaJ domain|PF01556:DnaJ C terminal domain	DnaJ_C
BjuVA02G11840	1.27905	-	1.81753	1.94385	Q9LLR6|NLTP4_ARATH Non-specific lipid-transfer protein 4 OS=Arabidopsis thaliana OX=3702 GN=LTP4 PE=3 SV=1 PF00234:Protease inhibitor/seed storage/LTP family	-
BjuVA07G36840	-1.48783	-	-1.63804	-	O04529|2MMP_ARATH Metalloendoproteinase 2-MMP OS=Arabidopsis thaliana OX=3702 GN=2MMP PE=1 SV=1 PF00413:Matrixin|PF01471:Putative peptidoglycan binding domain	PG_binding_1
BjuV_Contig00830G00180	-1.69861	-	-	-	Q84TD6|NAC47_ARATH NAC transcription factor 47 OS=Arabidopsis thaliana OX=3702 GN=NAC047 PE=2 SV=1 PF02365:No apical meristem (NAM) protein	NAM
BjuVA08G16190	-1.25613	-	-	-	-	-
BjuVB04G53070	-1.61468	-	-	-	Q0WR66|ASY3_ARATH Meiosis-specific protein ASY3 OS=Arabidopsis thaliana OX=3702 GN=ASY3 PE=1 SV=1 -	-
BjuVA10G29940	2.92626	-	-	4.22169	Q9FLR1|MYB29_ARATH Transcription factor MYB29 OS=Arabidopsis thaliana OX=3702 GN=MYB29 PE=1 SV=1 PF00249:Myb-like DNA-binding domain	Myb_DNA-binding
BjuVB06G13440	1.08038	-	-	-	PF04931:DNA polymerase phi	-
BjuVA09G05900	1.08616	-	1.78393	2.47467	Q708Y0|EBF2_ARATH EIN3-binding F-box protein 2 OS=Arabidopsis thaliana OX=3702 GN=EBF2 PE=1 SV=1 PF00646:F-box domain	F-box
BjuVB03G03150	1.06858	-	-	-	Q43291|RL211_ARATH 60S ribosomal protein L21-1 OS=Arabidopsis thaliana OX=3702 GN=RPL21A PE=2 SV=2 PF01157:Ribosomal protein L21e	-
BjuVA01G23530	1.07269	1.49751	1.47868	-	O23324|APS3_ARATH ATP-sulfurylase 3, chloroplastic OS=Arabidopsis thaliana OX=3702 GN=APS3 PE=1 SV=1 PF14306:PUA-like domain|PF01747:ATP-sulfurylase	-
BjuVA03G08940	1.18458	-	-	-	Q8VYW2|BAM9_ARATH Inactive beta-amylase 9 OS=Arabidopsis thaliana OX=3702 GN=BAM9 PE=2 SV=1 PF01373:Glycosyl hydrolase family 14	-
BjuVB02G61530	-1.29814	-	1.25332	-	Q39192|SRK2D_ARATH Serine/threonine-protein kinase SRK2D OS=Arabidopsis thaliana OX=3702 GN=SRK2D PE=1 SV=1 PF00069:Protein kinase domain	Pkinase
BjuVB03G24550	1.36873	-	-	-	Q9ZT50|RHA2A_ARATH E3 ubiquitin-protein ligase RHA2A OS=Arabidopsis thaliana OX=3702 GN=RHA2A PE=1 SV=1 PF13639:Ring finger domain	-
BjuVB07G05400	1.71103	-	-	-	Q54V77|PYRG_DICDI CTP synthase OS=Dictyostelium discoideum OX=44689 GN=ctps PE=3 SV=1 PF00117:Glutamine amidotransferase class-I|PF06418:CTP synthase N-terminus	CTP_synth_N
BjuVA03G10640	1.34647	1.7686	-	-	Q56WH4|HDT2_ARATH Histone deacetylase HDT2 OS=Arabidopsis thaliana OX=3702 GN=HDT2 PE=1 SV=2 PF17800:Nucleoplasmin-like domain	-
BjuVB07G08860	1.17895	-	2.20652	2.53906	Q9LVI4|TIF6B_ARATH Protein TIFY 6B OS=Arabidopsis thaliana OX=3702 GN=TIFY6B PE=1 SV=1 PF09425:Jas motif|PF06200:tify domain	Zim
BjuVB04G46530	4.9946	7.74848	10.0781	10.6205	Q9C5N8|GDL20_ARATH GDSL esterase/lipase At1g54020 OS=Arabidopsis thaliana OX=3702 GN=At1g54020 PE=2 SV=1 PF00657:GDSL-like Lipase/Acylhydrolase	Lipase_GDSL
BjuVA01G42130	1.38668	-	-	-	Q54V77|PYRG_DICDI CTP synthase OS=Dictyostelium discoideum OX=44689 GN=ctps PE=3 SV=1 PF00117:Glutamine amidotransferase class-I|PF06418:CTP synthase N-terminus	CTP_synth_N
BjuVA09G23570	2.49625	-	-	-	Q9ZUA2|PP141_ARATH Pentatricopeptide repeat-containing protein At2g01740 OS=Arabidopsis thaliana OX=3702 GN=At2g01740 PE=3 SV=1 PF12854:PPR repeat|PF13041:PPR repeat family|PF17177:Pentacotripeptide-repeat region of PRORP	-
BjuVB05G41740	1.15416	-	-	-	Q9M3A8|PP273_ARATH Pentatricopeptide repeat-containing protein At3g49240, mitochondrial OS=Arabidopsis thaliana OX=3702 GN=EMB1796 PE=1 SV=1 PF13041:PPR repeat family|PF01535:PPR repeat	PPR
BjuVA03G58870	1.74516	-	-	-	-	-
BjuVA01G10120	1.71548	-	-	-	O49687|MYC4_ARATH Transcription factor MYC4 OS=Arabidopsis thaliana OX=3702 GN=MYC4 PE=1 SV=1 PF00010:Helix-loop-helix DNA-binding domain|PF14215:bHLH-MYC and R2R3-MYB transcription factors N-terminal	HLH
BjuVB06G46010	1.38894	-	-	-	-	-
BjuVB03G23920	1.10969	-	-	-	O94808|GFPT2_HUMAN Glutamine--fructose-6-phosphate aminotransferase [isomerizing] 2 OS=Homo sapiens OX=9606 GN=GFPT2 PE=1 SV=3 PF13522:Glutamine amidotransferase domain|PF01380:SIS domain	SIS
BjuVB02G71330	-1.84398	-	-	-	Q84N34|HHP2_ARATH Heptahelical transmembrane protein 2 OS=Arabidopsis thaliana OX=3702 GN=HHP2 PE=2 SV=1 PF03006:Haemolysin-III related	-
BjuVB08G02400	-3.2036	-	-	-	Q84JL2|ODBA2_ARATH 2-oxoisovalerate dehydrogenase subunit alpha 2, mitochondrial OS=Arabidopsis thaliana OX=3702 GN=At5g09300 PE=1 SV=1 PF00676:Dehydrogenase E1 component	-
BjuVB05G54190	1.06143	2.13004	2.22802	2.76532	Q8W4J8|TIF7_ARATH Protein TIFY 7 OS=Arabidopsis thaliana OX=3702 GN=TIFY7 PE=1 SV=2 PF06200:tify domain|PF09425:Jas motif	Zim
BjuVA02G15190	1.62164	-	-	-	Q9MAT5|ANM10_ARATH Protein arginine N-methyltransferase PRMT10 OS=Arabidopsis thaliana OX=3702 GN=PRMT10 PE=1 SV=1 PF06325:Ribosomal protein L11 methyltransferase (PrmA)	-
BjuVB03G37600	-1.28933	-	-	-	Q9SX20|PTR18_ARATH Protein NRT1/ PTR FAMILY 3.1 OS=Arabidopsis thaliana OX=3702 GN=NPF3.1 PE=2 SV=1 PF00854:POT family	-
BjuVB05G18050	1.08889	-	-	-	P49211|RL321_ARATH 60S ribosomal protein L32-1 OS=Arabidopsis thaliana OX=3702 GN=RPL32A PE=2 SV=2 PF01655:Ribosomal protein L32	-
BjuVA06G01170	1.05232	-	-	-	Q9C942|CSE_ARATH Caffeoylshikimate esterase OS=Arabidopsis thaliana OX=3702 GN=CSE PE=1 SV=1 PF12146:Serine aminopeptidase, S33	-
BjuVB05G31420	1.53791	-	-	-	-	-
BjuVA07G37800	-1.12351	-	-	-	Q9C9H6|RLP11_ARATH Receptor-like protein 11 OS=Arabidopsis thaliana OX=3702 GN=RLP11 PE=3 SV=1 PF08263:Leucine rich repeat N-terminal domain|PF13855:Leucine rich repeat	LRRNT_2
BjuVB04G11050	-1.76571	-	1.26281	-	Q9FJ40|GDL86_ARATH GDSL esterase/lipase At5g45960 OS=Arabidopsis thaliana OX=3702 GN=At5g45960 PE=2 SV=1 PF00657:GDSL-like Lipase/Acylhydrolase	Lipase_GDSL
BjuVB02G50890	-1.32276	-	-1.07198	-	Q9ZU51|RHA2B_ARATH E3 ubiquitin-protein ligase RHA2B OS=Arabidopsis thaliana OX=3702 GN=RHA2B PE=1 SV=2 PF13639:Ring finger domain	-
BjuVA05G18710	1.07504	-	-	-	Q43292|RL372_ARATH 60S ribosomal protein L37-2 OS=Arabidopsis thaliana OX=3702 GN=RPL37B PE=3 SV=2 PF01907:Ribosomal protein L37e	-
BjuVB07G42240	1.0712	1.75367	1.1532	1.67091	Q9SVM8|RBG2_ARATH Glycine-rich RNA-binding protein 2, mitochondrial OS=Arabidopsis thaliana OX=3702 GN=RBG2 PE=1 SV=1 PF00076:RNA recognition motif. (a.k.a. RRM, RBD, or RNP domain)	RRM_1
BjuVA04G05560	1.3812	-	-	-	Q94FT2|SKIP5_ARATH F-box protein SKIP5 OS=Arabidopsis thaliana OX=3702 GN=SKIP5 PE=1 SV=1 PF12937:F-box-like	-
BjuVB03G33080	-1.10563	-	-	-	P93733|PLDB1_ARATH Phospholipase D beta 1 OS=Arabidopsis thaliana OX=3702 GN=PLDBETA1 PE=1 SV=4 PF12357:Phospholipase D C terminal|PF00168:C2 domain|PF00614:Phospholipase D Active site motif	C2
BjuVB08G19820	1.30006	-	-	-	Q9SH88|RRS1_ARATH Ribosome biogenesis regulatory protein homolog OS=Arabidopsis thaliana OX=3702 GN=At2g37990 PE=2 SV=2 PF04939:Ribosome biogenesis regulatory protein (RRS1)	-
BjuVB04G37990	1.64634	-	-2.92117	-	Q9C7F2|AB14B_ARATH ABC transporter B family member 14 OS=Arabidopsis thaliana OX=3702 GN=ABCB14 PE=3 SV=1 PF00005:ABC transporter|PF00664:ABC transporter transmembrane region	ABC_membrane
BjuVB07G18660	1.33933	-	-	-	Q9STY6|RS202_ARATH 40S ribosomal protein S20-2 OS=Arabidopsis thaliana OX=3702 GN=RPS20B PE=2 SV=1 PF00338:Ribosomal protein S10p/S20e	Ribosomal_S10
BjuVA09G19180	1.29064	-	-	-	-	-
BjuVA06G36500	2.13226	-	-	-	Q3E6S8|DGP14_ARATH Putative protease Do-like 14 OS=Arabidopsis thaliana OX=3702 GN=DEGP14 PE=3 SV=2 PF17820:PDZ domain|PF13365:Trypsin-like peptidase domain	-
BjuVB02G23660	1.20329	1.31245	-	-	Q9FFT9|RH32_ARATH DEAD-box ATP-dependent RNA helicase 32 OS=Arabidopsis thaliana OX=3702 GN=RH32 PE=2 SV=1 PF00271:Helicase conserved C-terminal domain|PF00270:DEAD/DEAH box helicase|PF13959:Domain of unknown function (DUF4217)	DEAD
BjuVB03G26490	2.644	3.35842	6.4242	6.27197	Q9LMA8|TI10A_ARATH Protein TIFY 10A OS=Arabidopsis thaliana OX=3702 GN=TIFY10A PE=1 SV=1 PF06200:tify domain|PF09425:Jas motif	Zim
BjuVB01G06720	1.05289	-	-	-	Q9ZUT9|RS51_ARATH 40S ribosomal protein S5-1 OS=Arabidopsis thaliana OX=3702 GN=RPS5A PE=1 SV=1 PF00177:Ribosomal protein S7p/S5e	-
BjuVA10G22710	1.25852	-	-	-	Q2KJJ5|TBL3_BOVIN Transducin beta-like protein 3 OS=Bos taurus OX=9913 GN=TBL3 PE=2 SV=1 PF00400:WD domain, G-beta repeat|PF08625:Utp13 specific WD40 associated domain	WD40
BjuVB03G07960	3.19807	-	-	-	Q9SBK6|JMT_BRARP Jasmonate O-methyltransferase OS=Brassica rapa subsp. pekinensis OX=51351 GN=JMT PE=1 SV=1 PF03492:SAM dependent carboxyl methyltransferase	-
BjuVA10G06210	-1.06658	-	-	1.86696	Q9S7T8|SPZX_ARATH Serpin-ZX OS=Arabidopsis thaliana OX=3702 GN=At1g47710 PE=1 SV=1 PF00079:Serpin (serine protease inhibitor)	Serpin
BjuVB01G35030	-2.87707	-	-	-3.81835	F4JCB2|CPL5_ARATH RNA polymerase II C-terminal domain phosphatase-like 5 OS=Arabidopsis thaliana OX=3702 GN=CPL5 PE=1 SV=2 PF03031:NLI interacting factor-like phosphatase	NIF
BjuVB06G02640	-1.19358	-	-1.30741	-2.01354	F4IN23|BZP34_ARATH Basic leucine zipper 34 OS=Arabidopsis thaliana OX=3702 GN=BZIP34 PE=1 SV=1 PF07716:Basic region leucine zipper	bZIP_2
BjuVB03G17120	1.41854	-	-	-	Q93VI3|RL171_ARATH 60S ribosomal protein L17-1 OS=Arabidopsis thaliana OX=3702 GN=RPL17A PE=2 SV=1 PF00237:Ribosomal protein L22p/L17e	-
BjuVB04G06790	-1.47961	-	1.19003	-	Q9LJP4|CSLC4_ARATH Xyloglucan glycosyltransferase 4 OS=Arabidopsis thaliana OX=3702 GN=CSLC4 PE=1 SV=1 PF13632:Glycosyl transferase family group 2	-
BjuVA08G30260	-1.13218	-	-	-	PF06708:Protein of unknown function (DUF1195)	-
BjuVB01G37420	1.86999	1.93303	-	2.20334	Q9LRN8|RK3B_ARATH 50S ribosomal protein L3-2, mitochondrial OS=Arabidopsis thaliana OX=3702 GN=RPL3B PE=1 SV=1 PF00297:Ribosomal protein L3	-
BjuVA05G20430	2.23704	-	4.06289	-	-	-
BjuVB06G11700	-1.0108	-	-	-	C0SVV6|CB60A_ARATH Calmodulin-binding protein 60 A OS=Arabidopsis thaliana OX=3702 GN=CBP60A PE=2 SV=1 PF07887:Calmodulin binding protein-like	-
BjuVA05G06400	1.05313	-1.74021	-1.42796	-	P92961|PROT1_ARATH Proline transporter 1 OS=Arabidopsis thaliana OX=3702 GN=PROT1 PE=1 SV=1 PF01490:Transmembrane amino acid transporter protein	Aa_trans
BjuVA09G41080	-1.02883	-	-	-	O48684|GATL8_ARATH Probable galacturonosyltransferase-like 8 OS=Arabidopsis thaliana OX=3702 GN=GATL8 PE=2 SV=1 PF01501:Glycosyl transferase family 8	Glyco_transf_8
BjuVA09G53110	1.02673	-	-	-	Q9M2F1|RS272_ARATH 40S ribosomal protein S27-2 OS=Arabidopsis thaliana OX=3702 GN=RPS27B PE=2 SV=2 PF01667:Ribosomal protein S27	-
BjuVB07G16810	1.35296	-	-	-	Q9FN11|LBD37_ARATH LOB domain-containing protein 37 OS=Arabidopsis thaliana OX=3702 GN=LBD37 PE=2 SV=1 PF03195:Lateral organ boundaries (LOB) domain	-
BjuVB01G02460	-1.56865	-	-	-	O22869|DF197_ARATH Defensin-like protein 197 OS=Arabidopsis thaliana OX=3702 GN=ATTI6 PE=3 SV=1 PF00537:Scorpion toxin-like domain	-
BjuVA09G13870	-1.32327	-	-	-	Q9SRE5|Y1666_ARATH Uncharacterized protein At1g76660 OS=Arabidopsis thaliana OX=3702 GN=At1g76660 PE=2 SV=1 -	-
BjuVB04G36720	-1.19304	-	1.39807	1.50724	Q9C6M5|RAVL1_ARATH AP2/ERF and B3 domain-containing transcription repressor TEM1 OS=Arabidopsis thaliana OX=3702 GN=TEM1 PE=1 SV=1 PF02362:B3 DNA binding domain|PF00847:AP2 domain	B3
BjuVA07G15990	-1.61932	-	-	-	Q9SGS5|Y1607_ARATH Uncharacterized protein At1g76070 OS=Arabidopsis thaliana OX=3702 GN=At1g76070 PE=1 SV=1 -	-
BjuVB01G04360	-1.18173	-	-1.24487	-	O22874|EXPA8_ARATH Expansin-A8 OS=Arabidopsis thaliana OX=3702 GN=EXPA8 PE=2 SV=1 PF01661:Macro domain|PF01357:Expansin C-terminal domain|PF03330:Lytic transglycolase	A1pp
BjuVA05G01930	-1.01294	-	-	-	Q8RXD9|DPE2_ARATH 4-alpha-glucanotransferase DPE2 OS=Arabidopsis thaliana OX=3702 GN=DPE2 PE=1 SV=1 PF00686:Starch binding domain|PF02446:4-alpha-glucanotransferase	-
BjuVA05G43570	-1.27954	-	1.87454	-	-	-
BjuVA07G16610	-1.45341	-	-	-	Q65XS5|BC10_ORYSJ Glycosyltransferase BC10 OS=Oryza sativa subsp. japonica OX=39947 GN=BC10 PE=1 SV=1 PF02485:Core-2/I-Branching enzyme	-
BjuVB08G33980	-1.1731	-	1.49563	-	Q9M2R0|FTIP3_ARATH FT-interacting protein 3 OS=Arabidopsis thaliana OX=3702 GN=FTIP3 PE=1 SV=1 PF08372:Plant phosphoribosyltransferase C-terminal|PF00168:C2 domain	C2
BjuVB04G04660	-2.13627	-	-	-	Q8LGA5|ATL31_ARATH E3 ubiquitin-protein ligase ATL31 OS=Arabidopsis thaliana OX=3702 GN=ATL31 PE=1 SV=2 PF13639:Ring finger domain	-
BjuVB04G09460	-2.49032	-	-	-	-	-
BjuVA02G25290	1.16346	-	-	-	P42763|ERD14_ARATH Dehydrin ERD14 OS=Arabidopsis thaliana OX=3702 GN=ERD14 PE=1 SV=1 -	-
BjuVB07G11920	1.09369	-	-2.82741	-	P93735|ELIP1_ARATH Early light-induced protein 1, chloroplastic OS=Arabidopsis thaliana OX=3702 GN=ELIP1 PE=1 SV=1 -	-
BjuVA02G45630	2.69538	6.05813	8.43415	7.97736	O82122|VSP2_ARATH Vegetative storage protein 2 OS=Arabidopsis thaliana OX=3702 GN=VSP2 PE=2 SV=1 PF03767:HAD superfamily, subfamily IIIB (Acid phosphatase)	-
BjuVA02G28730	1.11903	-	-	-	F4K1Z0|ECT3_ARATH YTH domain-containing protein ECT3 OS=Arabidopsis thaliana OX=3702 GN=ECT3 PE=1 SV=1 PF04146:YT521-B-like domain	YTH
BjuVA04G20880	-2.72535	-	-	-	Q9ZVD2|NHL13_ARATH NDR1/HIN1-like protein 13 OS=Arabidopsis thaliana OX=3702 GN=NHL13 PE=2 SV=1 PF03168:Late embryogenesis abundant protein	-
BjuVB04G00390	-1.32328	-	-	-	Q9SSW1|AZF1_ARATH Zinc finger protein AZF1 OS=Arabidopsis thaliana OX=3702 GN=AZF1 PE=2 SV=1 PF13912:C2H2-type zinc finger	-
BjuVB02G71840	-1.21744	1.39509	1.42247	2.32115	Q9C5T4|WRK18_ARATH WRKY transcription factor 18 OS=Arabidopsis thaliana OX=3702 GN=WRKY18 PE=1 SV=2 PF03106:WRKY DNA -binding domain	WRKY
BjuVA06G14950	2.17974	-	1.96118	-	P28493|PR5_ARATH Pathogenesis-related protein 5 OS=Arabidopsis thaliana OX=3702 GN=At1g75040 PE=1 SV=1 PF00314:Thaumatin family	Thaumatin
BjuVA02G35460	-1.58614	-	-	-	F4KHI3|VICTR_ARATH Protein VARIATION IN COMPOUND TRIGGERED ROOT growth response OS=Arabidopsis thaliana OX=3702 GN=VICTR PE=1 SV=1 PF01582:TIR domain|PF07725:Leucine Rich Repeat	TIR
BjuVA04G10780	-1.1716	-	-	-	Q8GYB4|CAAT3_ARATH Cationic amino acid transporter 3, mitochondrial OS=Arabidopsis thaliana OX=3702 GN=CAT3 PE=2 SV=1 PF13520:Amino acid permease|PF13906:C-terminus of AA_permease	-
BjuVA06G35000	1.10626	-	1.92958	2.62642	Q708Y0|EBF2_ARATH EIN3-binding F-box protein 2 OS=Arabidopsis thaliana OX=3702 GN=EBF2 PE=1 SV=1 PF00646:F-box domain	F-box
BjuVB03G13470	1.56143	1.70126	-	-	Q6NRY2|NOL6_XENLA Nucleolar protein 6 OS=Xenopus laevis OX=8355 GN=nol6 PE=2 SV=2 PF17405:Nrap protein nucleotidyltransferase domain 4|PF17407:Nrap protein domain 6|PF17404:Nrap protein domain 3|PF03813:Nrap protein domain 1|PF17406:Nrap protein PAP/OAS1-like domain 5|PF17403:Nrap protein PAP/OAS-like domain	-
BjuVA03G53020	-1.28302	-2.49455	-3.23511	-3.06621	PF00149:Calcineurin-like phosphoesterase	Metallophos
BjuVB02G35210	1.24105	-	-4.06864	-	Q39057|CONS_ARATH Zinc finger protein CONSTANS OS=Arabidopsis thaliana OX=3702 GN=CO PE=1 SV=1 PF00643:B-box zinc finger|PF06203:CCT motif	CCT
BjuVB08G32090	-1.44719	-	1.48485	1.33609	PF00702:haloacid dehalogenase-like hydrolase	Hydrolase
BjuVA09G52810	1.2868	-	-	-	P59224|RS132_ARATH 40S ribosomal protein S13-2 OS=Arabidopsis thaliana OX=3702 GN=RPS13B PE=2 SV=1 PF00312:Ribosomal protein S15|PF08069:Ribosomal S13/S15 N-terminal domain	-
BjuVB07G46220	-1.32323	-	-	-	Q852U6|RHY1A_ARATH Probable E3 ubiquitin-protein ligase RHY1A OS=Arabidopsis thaliana OX=3702 GN=RHY1A PE=1 SV=1 PF13639:Ring finger domain	-
BjuVB06G16240	2.30983	-	-	-	O00566|MPP10_HUMAN U3 small nucleolar ribonucleoprotein protein MPP10 OS=Homo sapiens OX=9606 GN=MPHOSPH10 PE=1 SV=2 PF04006:Mpp10 protein	-
BjuVB05G39070	1.23174	-	-	-	I1JNS6|GIP1_SOYBN Probable aspartic proteinase GIP1 OS=Glycine max OX=3847 GN=GIP1 PE=1 SV=2 PF14541:Xylanase inhibitor C-terminal|PF14543:Xylanase inhibitor N-terminal	-
BjuVB07G08180	-1.64262	-	-	-	Q9LIB6|COBL8_ARATH COBRA-like protein 8 OS=Arabidopsis thaliana OX=3702 GN=COBL8 PE=2 SV=1 PF04833:COBRA-like protein	-
BjuVA03G59270	-1.84069	-	-	-	Q84N34|HHP2_ARATH Heptahelical transmembrane protein 2 OS=Arabidopsis thaliana OX=3702 GN=HHP2 PE=2 SV=1 PF03006:Haemolysin-III related	-
BjuVB05G40530	4.07423	-	-	-	Q8LC79|GAT18_ARATH GATA transcription factor 18 OS=Arabidopsis thaliana OX=3702 GN=GATA18 PE=1 SV=2 PF00320:GATA zinc finger	GATA
BjuVA05G07500	-1.18834	-	-	-	Q9M015|Y5161_ARATH Uncharacterized protein At5g01610 OS=Arabidopsis thaliana OX=3702 GN=At5g01610 PE=1 SV=1 PF04398:Protein of unknown function, DUF538	-
BjuVA01G26500	-1.05777	-	-	-	Q9SU71|EDSBC_ARATH Protein EDS1B OS=Arabidopsis thaliana OX=3702 GN=EDS1B PE=1 SV=1 PF01764:Lipase (class 3)|PF18117:Enhanced disease susceptibility 1 protein EP domain	Lipase_3
BjuVB02G56100	1.091	-	-	-	P49227|RL52_ARATH 60S ribosomal protein L5-2 OS=Arabidopsis thaliana OX=3702 GN=RPL5B PE=2 SV=3 PF17144:Ribosomal large subunit proteins 60S L5, and 50S L18|PF14204:Ribosomal L18 C-terminal region	-
BjuVB08G14400	1.31174	-	-	-	P49200|RS201_ARATH 40S ribosomal protein S20-1 OS=Arabidopsis thaliana OX=3702 GN=RPS20A PE=2 SV=2 PF00338:Ribosomal protein S10p/S20e	Ribosomal_S10
BjuVB07G13480	-1.01148	-	-	-	Q94KB7|MLO6_ARATH MLO-like protein 6 OS=Arabidopsis thaliana OX=3702 GN=MLO6 PE=2 SV=2 PF03094:Mlo family	-
BjuVB04G14350	-1.06292	-	-1.24113	-	Q9FGQ9|FLZ1_ARATH FCS-Like Zinc finger 1 OS=Arabidopsis thaliana OX=3702 GN=FLZ1 PE=1 SV=1 PF04570:zinc-finger of the FCS-type, C2-C2	-
BjuVB08G03590	2.6794	-	-	-	P29830|HS176_ARATH 17.6 kDa class II heat shock protein OS=Arabidopsis thaliana OX=3702 GN=HSP17.6 PE=2 SV=1 PF00011:Hsp20/alpha crystallin family	-
BjuVA02G16540	-1.44357	-	-	-	Q9LTE1|HIP14_ARATH Heavy metal-associated isoprenylated plant protein 14 OS=Arabidopsis thaliana OX=3702 GN=HIPP14 PE=2 SV=1 PF00403:Heavy-metal-associated domain	HMA
BjuVA04G03570	2.1944	2.80583	4.17679	5.10618	Q9M1J7|SSL8_ARATH Protein STRICTOSIDINE SYNTHASE-LIKE 8 OS=Arabidopsis thaliana OX=3702 GN=SSL8 PE=2 SV=1 PF03088:Strictosidine synthase	Str_synth
BjuVA10G31310	-1.62145	1.26006	1.02325	-	O82132|DRE2A_ARATH Dehydration-responsive element-binding protein 2A OS=Arabidopsis thaliana OX=3702 GN=DREB2A PE=1 SV=1 PF00847:AP2 domain	AP2
BjuVB08G51700	-1.50295	-	-	-	Q9SVC6|PUB22_ARATH E3 ubiquitin-protein ligase PUB22 OS=Arabidopsis thaliana OX=3702 GN=PUB22 PE=1 SV=1 PF04564:U-box domain	U-box
BjuVA02G25560	-1.00154	-	-	-	Q9C9K1|CB7_ARATH Chlorophyll a-b binding protein 7, chloroplastic OS=Arabidopsis thaliana OX=3702 GN=LHCB7 PE=2 SV=1 PF00504:Chlorophyll A-B binding protein	-
BjuVA03G60100	-1.08237	-	-	-	-	-
BjuVA02G06730	-1.58311	-	-	-	D4AZ24|ENG1_ARTBC Probable endo-1,3(4)-beta-glucanase ARB_01444 OS=Arthroderma benhamiae (strain ATCC MYA-4681 / CBS 112371) OX=663331 GN=ARB_01444 PE=1 SV=1 PF17652:Glycosyl hydrolase family 81 C-terminal domain|PF03639:Glycosyl hydrolase family 81 N-terminal domain	-
BjuVA04G04120	1.11809	-	-	-1.55519	-	-
BjuVB05G18090	-1.17358	-	1.30905	-	Q9FUR2|IP5P2_ARATH Type I inositol polyphosphate 5-phosphatase 2 OS=Arabidopsis thaliana OX=3702 GN=IP5P2 PE=1 SV=2 -	-
BjuVB01G08660	-3.14207	1.93032	2.71502	-	O64682|PID_ARATH Protein kinase PINOID OS=Arabidopsis thaliana OX=3702 GN=PID PE=1 SV=1 PF00069:Protein kinase domain	Pkinase
BjuVA03G14580	1.15072	-	-2.16128	-1.93131	Q9FN26|U79B6_ARATH UDP-glycosyltransferase 79B6 OS=Arabidopsis thaliana OX=3702 GN=UGT79B6 PE=2 SV=1 PF00201:UDP-glucoronosyl and UDP-glucosyl transferase	UDPGT
BjuVB04G21640	-1.18883	-	-	-	Q9XSC3|WDR44_BOVIN WD repeat-containing protein 44 OS=Bos taurus OX=9913 GN=WDR44 PE=1 SV=1 PF00400:WD domain, G-beta repeat	WD40
BjuVB03G00880	1.04688	-	-	-	Q9C6I8|NOG1_ARATH Nucleolar GTP-binding protein 1 OS=Arabidopsis thaliana OX=3702 GN=At1g50920 PE=2 SV=1 PF06858:Nucleolar GTP-binding protein 1 (NOG1)|PF17835:NOG1 N-terminal helical domain|PF08155:NOGCT (NUC087) domain	-
BjuVB04G01210	-1.50503	-	1.55097	1.90483	Q9FME8|OPT4_ARATH Oligopeptide transporter 4 OS=Arabidopsis thaliana OX=3702 GN=OPT4 PE=1 SV=1 PF03169:OPT oligopeptide transporter protein	OPT
BjuVA05G36120	-2.39084	-	-	-	PF03080:Neprosin|PF14365:Neprosin activation peptide	-
BjuVA01G08100	1.06507	-	-	-	Q80XQ2|TBCD5_MOUSE TBC1 domain family member 5 OS=Mus musculus OX=10090 GN=Tbc1d5 PE=1 SV=2 PF00566:Rab-GTPase-TBC domain	TBC
BjuVB03G46230	5.90054	6.59155	8.1451	7.42867	PF00917:MATH domain	MATH
BjuVA08G29640	-1.04025	-	-	-	Q9LM76|PUB44_ARATH U-box domain-containing protein 44 OS=Arabidopsis thaliana OX=3702 GN=PUB44 PE=1 SV=1 PF04564:U-box domain	U-box
BjuVA05G05030	1.07662	1.3628	-	1.60192	F4IW10|EFGM2_ARATH Elongation factor G-2, mitochondrial OS=Arabidopsis thaliana OX=3702 GN=MEFG2 PE=1 SV=1 PF03764:Elongation factor G, domain IV|PF14492:Elongation Factor G, domain III|PF03144:Elongation factor Tu domain 2|PF00679:Elongation factor G C-terminus|PF00009:Elongation factor Tu GTP binding domain	GTP_EFTU
BjuVA10G22390	1.35087	-	-	-	Q8CD92|TTC27_MOUSE Tetratricopeptide repeat protein 27 OS=Mus musculus OX=10090 GN=Ttc27 PE=1 SV=2 -	-
BjuVA08G24210	1.99859	-	2.43965	-	-	-
BjuVB04G15700	-1.20931	-	-	1.55286	Q9CYW4|HDHD3_MOUSE Haloacid dehalogenase-like hydrolase domain-containing protein 3 OS=Mus musculus OX=10090 GN=Hdhd3 PE=1 SV=1 PF00702:haloacid dehalogenase-like hydrolase	Hydrolase
BjuVA09G61690	-1.07741	-	-	-	Q9LQU5|NUD18_ARATH Nudix hydrolase 18, mitochondrial OS=Arabidopsis thaliana OX=3702 GN=NUDT18 PE=2 SV=1 PF00293:NUDIX domain	NUDIX
BjuVA03G63090	-1.081	1.05251	1.66986	-	P27450|CST_ARATH Probable serine/threonine-protein kinase CST OS=Arabidopsis thaliana OX=3702 GN=CST PE=1 SV=2 PF07714:Protein tyrosine and serine/threonine kinase	Pkinase_Tyr
BjuVA07G18550	1.20674	1.40078	-	-	Q9SLF7|RLA22_ARATH 60S acidic ribosomal protein P2-2 OS=Arabidopsis thaliana OX=3702 GN=RPP2B PE=1 SV=1 PF00428:60s Acidic ribosomal protein	-
BjuVA09G09910	1.08504	-	-	1.23013	O00566|MPP10_HUMAN U3 small nucleolar ribonucleoprotein protein MPP10 OS=Homo sapiens OX=9606 GN=MPHOSPH10 PE=1 SV=2 PF04006:Mpp10 protein	-
BjuVA01G20190	-2.59635	-	-2.28717	-	Q9M0J3|ERF54_ARATH Ethylene-responsive transcription factor ERF054 OS=Arabidopsis thaliana OX=3702 GN=ERF054 PE=2 SV=1 PF00847:AP2 domain	AP2
BjuVB06G19400	-2.50818	-	-	-2.08521	O80871|P2C25_ARATH Probable protein phosphatase 2C 25 OS=Arabidopsis thaliana OX=3702 GN=At2g30020 PE=1 SV=1 PF00481:Protein phosphatase 2C	PP2C
BjuVB02G00180	-1.01015	-	-	-	-	-
BjuVA07G01040	-1.10135	-	-	-	O82199|C3H20_ARATH Zinc finger CCCH domain-containing protein 20 OS=Arabidopsis thaliana OX=3702 GN=At2g19810 PE=2 SV=1 -	-
BjuVB03G43030	1.78553	2.12	-	1.9352	Q9LRQ8|PMAT2_ARATH Phenolic glucoside malonyltransferase 2 OS=Arabidopsis thaliana OX=3702 GN=PMAT2 PE=1 SV=1 PF02458:Transferase family	-
BjuVB08G49670	-1.39877	-	-	-	Q9SCS7|HR3_ARATH RPW8-like protein 3 OS=Arabidopsis thaliana OX=3702 GN=HR3 PE=2 SV=1 PF05659:Arabidopsis broad-spectrum mildew resistance protein RPW8	-
BjuVB02G25900	1.1007	-	-	-	P41777|NOLC1_RAT Nucleolar and coiled-body phosphoprotein 1 OS=Rattus norvegicus OX=10116 GN=Nolc1 PE=1 SV=2 PF05022:SRP40, C-terminal domain	-
BjuV_Contig00711G00020	-3.11774	-	-	-5.0449	Q9C7C4|EML1_ARATH Protein EMSY-LIKE 1 OS=Arabidopsis thaliana OX=3702 GN=EML1 PE=1 SV=1 PF03735:ENT domain	-
BjuVA08G06850	-1.84165	-	-	-	A1Z713|VPS13_DROME Vacuolar protein sorting-associated protein 13 OS=Drosophila melanogaster OX=7227 GN=Vps13 PE=1 SV=2 -	-
BjuVA09G24950	1.3755	-	-	2.10086	P0CG85|UBI1P_NICSY Polyubiquitin OS=Nicotiana sylvestris OX=4096 GN=UBI11 PE=2 SV=1 PF00240:Ubiquitin family	ubiquitin
BjuVA02G13550	-1.37604	-	-	-	F4K956|A70_ARATH Pathogen-associated molecular patterns-induced protein A70 OS=Arabidopsis thaliana OX=3702 GN=A70 PE=1 SV=1 PF14364:Domain of unknown function (DUF4408)|PF05553:Cotton fibre expressed protein	-
BjuVA08G28920	-2.60254	-	-	-	Q39234|TGA3_ARATH Transcription factor TGA3 OS=Arabidopsis thaliana OX=3702 GN=TGA3 PE=1 SV=1 PF00170:bZIP transcription factor|PF14144:Seed dormancy control	bZIP_1
BjuVB07G16480	-6.00206	-	-	-	Q9FKZ2|DRL41_ARATH Probable disease resistance protein At5g66890 OS=Arabidopsis thaliana OX=3702 GN=At5g66890 PE=3 SV=1 -	-
BjuVA03G02690	-1.74121	1.54276	1.27568	-	Q9M5J9|PGIP1_ARATH Polygalacturonase inhibitor 1 OS=Arabidopsis thaliana OX=3702 GN=PGIP1 PE=1 SV=1 PF13855:Leucine rich repeat	-
BjuVB02G32310	-1.07883	-	1.07016	-	P24805|TSJT1_TOBAC Stem-specific protein TSJT1 OS=Nicotiana tabacum OX=4097 GN=TSJT1 PE=2 SV=1 PF12481:Aluminium induced protein	-
BjuVB01G26860	-1.14994	-	-	-	Q9ZUF4|RIPK_ARATH Serine/threonine-protein kinase RIPK OS=Arabidopsis thaliana OX=3702 GN=RIPK PE=1 SV=1 PF07714:Protein tyrosine and serine/threonine kinase	Pkinase_Tyr
BjuVB08G16990	1.11837	-	-	-	O48773|PDI23_ARATH Protein disulfide-isomerase 2-3 OS=Arabidopsis thaliana OX=3702 GN=PDIL2-3 PE=2 SV=1 PF00085:Thioredoxin	-
BjuVB07G17660	1.6762	-	-	-	P34789|RS282_ARATH 40S ribosomal protein S28-2 OS=Arabidopsis thaliana OX=3702 GN=RPS28C PE=3 SV=1 -	-
BjuVB06G24050	1.0866	-	-	-	Q9SLF7|RLA22_ARATH 60S acidic ribosomal protein P2-2 OS=Arabidopsis thaliana OX=3702 GN=RPP2B PE=1 SV=1 PF00428:60s Acidic ribosomal protein	-
BjuVB01G41590	1.63024	-	-	-	O94514|NOP56_SCHPO Nucleolar protein 56 OS=Schizosaccharomyces pombe (strain 972 / ATCC 24843) OX=284812 GN=nop56 PE=3 SV=1 PF01798:snoRNA binding domain, fibrillarin|PF08156:NOP5NT (NUC127) domain	-
BjuVA01G03050	-1.23095	-	-	-	P27450|CST_ARATH Probable serine/threonine-protein kinase CST OS=Arabidopsis thaliana OX=3702 GN=CST PE=1 SV=2 PF07714:Protein tyrosine and serine/threonine kinase	Pkinase_Tyr
BjuVA05G12330	-1.0931	-	-	-	O48772|C3H26_ARATH Zinc finger CCCH domain-containing protein 26 OS=Arabidopsis thaliana OX=3702 GN=ZFN2 PE=1 SV=1 PF00642:Zinc finger C-x8-C-x5-C-x3-H type (and similar)	zf-CCCH
BjuVA09G52400	3.79022	-	-	-	O80506|FLZ3_ARATH FCS-Like Zinc finger 3 OS=Arabidopsis thaliana OX=3702 GN=FLZ3 PE=1 SV=1 -	-
BjuVA05G21720	-1.15519	-	-	-	Q94C40|CIPKH_ARATH CBL-interacting serine/threonine-protein kinase 17 OS=Arabidopsis thaliana OX=3702 GN=CIPK17 PE=1 SV=1 PF00069:Protein kinase domain|PF03822:NAF domain	Pkinase
BjuVB02G64060	1.24771	-	-1.85357	-2.01934	Q84KJ5|CRYD_ARATH Cryptochrome DASH, chloroplastic/mitochondrial OS=Arabidopsis thaliana OX=3702 GN=CRYD PE=1 SV=2 PF00875:DNA photolyase|PF03441:FAD binding domain of DNA photolyase	-
BjuVA07G15840	-1.00539	-	1.2615	-	Q96528|CATA1_ARATH Catalase-1 OS=Arabidopsis thaliana OX=3702 GN=CAT1 PE=1 SV=3 PF00199:Catalase|PF06628:Catalase-related immune-responsive	Catalase
BjuVA09G23720	-1.09403	-	-	-	Q8GYC1|IDD4_ARATH Protein indeterminate-domain 4, chloroplastic OS=Arabidopsis thaliana OX=3702 GN=IDD4 PE=1 SV=1 -	-
BjuVB02G61030	-1.09681	-	-	1.21769	Q9SCZ4|FERON_ARATH Receptor-like protein kinase FERONIA OS=Arabidopsis thaliana OX=3702 GN=FER PE=1 SV=1 PF12819:Malectin-like domain|PF07714:Protein tyrosine and serine/threonine kinase	Pkinase_Tyr
BjuVA04G04130	1.34655	-	-	-	Q9LYK9|RS263_ARATH 40S ribosomal protein S26-3 OS=Arabidopsis thaliana OX=3702 GN=RPS26C PE=2 SV=1 PF01283:Ribosomal protein S26e	-
BjuVB02G29590	-1.35395	-	1.08275	-	Q9FJH5|HIP3_ARATH Heavy metal-associated isoprenylated plant protein 3 OS=Arabidopsis thaliana OX=3702 GN=HIPP03 PE=1 SV=1 PF00403:Heavy-metal-associated domain	HMA
BjuVA07G28790	1.45011	-	1.3754	-	P42763|ERD14_ARATH Dehydrin ERD14 OS=Arabidopsis thaliana OX=3702 GN=ERD14 PE=1 SV=1 PF00257:Dehydrin	-
BjuVA03G40020	1.09455	-	-	-	Q9LIH9|RH51_ARATH DEAD-box ATP-dependent RNA helicase 51 OS=Arabidopsis thaliana OX=3702 GN=RH51 PE=2 SV=1 PF00271:Helicase conserved C-terminal domain|PF00270:DEAD/DEAH box helicase|PF13959:Domain of unknown function (DUF4217)	DEAD
BjuVA05G26620	1.12332	-	-	-	P51419|RL273_ARATH 60S ribosomal protein L27-3 OS=Arabidopsis thaliana OX=3702 GN=RPL27C PE=2 SV=2 PF01777:Ribosomal L27e protein family	-
BjuVA08G31250	-1.97586	-	-	-	-	-
BjuVB04G53360	-2.06377	-	-	-	Q99JW2|ACY1_MOUSE Aminoacylase-1 OS=Mus musculus OX=10090 GN=Acy1 PE=1 SV=1 PF01546:Peptidase family M20/M25/M40	Peptidase_M20
BjuVB08G36740	-1.24438	-	-	-2.75825	O81291|LRK44_ARATH L-type lectin-domain containing receptor kinase IV.4 OS=Arabidopsis thaliana OX=3702 GN=LECRK44 PE=3 SV=1 PF00069:Protein kinase domain|PF00139:Legume lectin domain	Pkinase
BjuVA01G07280	-1.0873	-	-	-	-	-
BjuVB06G39680	1.49049	-	-	-	Q38822|IAA3_ARATH Auxin-responsive protein IAA3 OS=Arabidopsis thaliana OX=3702 GN=IAA3 PE=1 SV=1 PF02309:AUX/IAA family	-
BjuVA05G31730	-1.11182	-	-	-	Q9SUC9|UGPI7_ARATH Uncharacterized GPI-anchored protein At4g28100 OS=Arabidopsis thaliana OX=3702 GN=At4g28100 PE=2 SV=1 PF19160:SPARK	-
BjuVA09G56350	-1.03012	-	-	-	Q9ZUH1|Y2424_ARATH BTB/POZ domain-containing protein At2g24240 OS=Arabidopsis thaliana OX=3702 GN=At2g24240 PE=2 SV=1 PF02214:BTB/POZ domain	K_tetra
BjuVA05G01180	1.16667	-	-	-	-	-
BjuVA02G30580	-1.08426	-	-	-	Q8H1H9|AMO_ARATH Primary amine oxidase OS=Arabidopsis thaliana OX=3702 GN=At1g62810 PE=2 SV=1 PF01179:Copper amine oxidase, enzyme domain|PF02728:Copper amine oxidase, N3 domain|PF02727:Copper amine oxidase, N2 domain	-
BjuVA08G13670	1.03748	-	-	-	P49211|RL321_ARATH 60S ribosomal protein L32-1 OS=Arabidopsis thaliana OX=3702 GN=RPL32A PE=2 SV=2 PF01655:Ribosomal protein L32	-
BjuVA06G34760	2.35086	-	-	-	Q8VZF6|EDR2L_ARATH Protein ENHANCED DISEASE RESISTANCE 2-like OS=Arabidopsis thaliana OX=3702 GN=EDR2L PE=2 SV=1 PF07059:Protein of unknown function (DUF1336)	-
BjuVA09G07490	-1.09979	-	-1.15687	-1.40649	Q24JK1|MYB96_ARATH Transcription factor MYB96 OS=Arabidopsis thaliana OX=3702 GN=MYB96 PE=2 SV=1 PF00249:Myb-like DNA-binding domain	Myb_DNA-binding
BjuVA06G00440	1.08432	-	-	-	Q9LHP2|SL30A_ARATH Serine/arginine-rich SC35-like splicing factor SCL30A OS=Arabidopsis thaliana OX=3702 GN=SCL30A PE=1 SV=1 PF00076:RNA recognition motif. (a.k.a. RRM, RBD, or RNP domain)	RRM_1
BjuVA02G20220	1.0226	-	-	-	Q9SX25|CXE6_ARATH Probable carboxylesterase 6 OS=Arabidopsis thaliana OX=3702 GN=CXE6 PE=2 SV=1 PF07859:alpha/beta hydrolase fold	Abhydrolase_3
BjuVB05G02290	1.0121	-	-	-	Q70E96|AL3F1_ARATH Aldehyde dehydrogenase family 3 member F1 OS=Arabidopsis thaliana OX=3702 GN=ALDH3F1 PE=2 SV=2 PF00171:Aldehyde dehydrogenase family	Aldedh
BjuVA03G11600	1.15539	-	-1.54108	-2.80351	Q9LLR7|NLTP3_ARATH Non-specific lipid-transfer protein 3 OS=Arabidopsis thaliana OX=3702 GN=LTP3 PE=3 SV=1 -	-
BjuVA10G32090	1.09517	-	-	-	O74978|YQL5_SCHPO Uncharacterized RNA-binding protein C1827.05c OS=Schizosaccharomyces pombe (strain 972 / ATCC 24843) OX=284812 GN=SPCC1827.05c PE=4 SV=1 PF00076:RNA recognition motif. (a.k.a. RRM, RBD, or RNP domain)|PF01564:Spermine/spermidine synthase domain	RRM_1
BjuVB01G10390	-1.18372	-	-	-	Q9LJS0|RLP42_ARATH Receptor-like protein 42 OS=Arabidopsis thaliana OX=3702 GN=RLP42 PE=1 SV=1 PF13855:Leucine rich repeat	-
BjuVA06G02370	-1.2806	1.18814	-	-	Q9C6T7|FAX5_ARATH Protein FATTY ACID EXPORT 5 OS=Arabidopsis thaliana OX=3702 GN=FAX5 PE=3 SV=1 PF03647:Transmembrane proteins 14C	-
BjuVA07G31780	-1.52992	-	-	-	Q9FI14|TAO1_ARATH Disease resistance protein TAO1 OS=Arabidopsis thaliana OX=3702 GN=TAO1 PE=3 SV=1 PF01582:TIR domain|PF07725:Leucine Rich Repeat|PF00931:NB-ARC domain	TIR
BjuVB02G75210	1.08735	1.57838	1.30088	1.56084	O49196|APK2_ARATH Adenylyl-sulfate kinase 2, chloroplastic OS=Arabidopsis thaliana OX=3702 GN=APK2 PE=1 SV=1 PF01583:Adenylylsulphate kinase	-
BjuVB06G13170	1.18608	-	-	-	Q9SR73|RS281_ARATH 40S ribosomal protein S28-1 OS=Arabidopsis thaliana OX=3702 GN=RPS28A PE=3 SV=1 PF01200:Ribosomal protein S28e	-
BjuVB05G13680	-1.65186	-	1.80122	1.90922	O65479|CRK20_ARATH Putative cysteine-rich receptor-like protein kinase 20 OS=Arabidopsis thaliana OX=3702 GN=CRK20 PE=2 SV=2 PF01657:Salt stress response/antifungal|PF07714:Protein tyrosine and serine/threonine kinase|PF07727:Reverse transcriptase (RNA-dependent DNA polymerase)	RVT_2
BjuVA02G06800	-1.08447	-	1.58816	-	-	-
BjuVB01G44590	1.19612	-	-	-	O43030|FES1_SCHPO Hsp70 nucleotide exchange factor fes1 OS=Schizosaccharomyces pombe (strain 972 / ATCC 24843) OX=284812 GN=fes1 PE=1 SV=1 PF08609:Nucleotide exchange factor Fes1	-
BjuVA02G27110	-1.10109	-	-	-	-	-
BjuVA02G26340	2.31222	-	-	-	P39868|NIA2_BRANA Nitrate reductase [NADH], clone PBNBR1412 OS=Brassica napus OX=3708 GN=NIA2 PE=2 SV=1 PF03404:Mo-co oxidoreductase dimerisation domain|PF00970:Oxidoreductase FAD-binding domain|PF00174:Oxidoreductase molybdopterin binding domain|PF00175:Oxidoreductase NAD-binding domain|PF00173:Cytochrome b5-like Heme/Steroid binding domain	FAD_binding_6
BjuVA09G47930	1.02756	-2.66394	-2.66126	-4.86838	-	-
BjuVB03G13530	1.30869	-	-	-	Q9M065|PP352_ARATH Pentatricopeptide repeat-containing protein At4g36680, mitochondrial OS=Arabidopsis thaliana OX=3702 GN=At4g36680 PE=1 SV=1 PF13041:PPR repeat family	-
BjuVA03G53510	-1.94163	-	-	-	Q9CAK4|ROH1_ARATH Protein ROH1 OS=Arabidopsis thaliana OX=3702 GN=ROH1 PE=1 SV=1 PF05633:Protein BYPASS1-related	-
BjuVA02G20640	1.23597	1.40286	-	-	Q9VEJ2|NOP14_DROME Nucleolar protein 14 homolog OS=Drosophila melanogaster OX=7227 GN=l(3)07882 PE=2 SV=2 PF04147:Nop14-like family	-
BjuVA01G19180	-1.20555	-	-	-	O81833|SD11_ARATH G-type lectin S-receptor-like serine/threonine-protein kinase SD1-1 OS=Arabidopsis thaliana OX=3702 GN=SD11 PE=1 SV=1 PF00954:S-locus glycoprotein domain|PF07714:Protein tyrosine and serine/threonine kinase|PF01453:D-mannose binding lectin|PF08276:PAN-like domain|PF11883:Domain of unknown function (DUF3403)	Pkinase_Tyr
BjuVB02G57640	-1.20051	-	-	-	P94077|LSD1_ARATH Protein LSD1 OS=Arabidopsis thaliana OX=3702 GN=LSD1 PE=1 SV=1 PF06943:LSD1 zinc finger	zf-LSD1
BjuVA09G58100	1.00991	-	-	-	Q8CGC6|RBM28_MOUSE RNA-binding protein 28 OS=Mus musculus OX=10090 GN=Rbm28 PE=1 SV=4 PF00076:RNA recognition motif. (a.k.a. RRM, RBD, or RNP domain)	RRM_1
BjuVA01G04060	-2.31484	2.47848	2.87412	1.88402	Q9SZ06|EF109_ARATH Ethylene-responsive transcription factor ERF109 OS=Arabidopsis thaliana OX=3702 GN=ERF109 PE=1 SV=1 PF00847:AP2 domain	AP2
BjuVA02G11430	1.19073	-	-	-	Q00332|RS15A_BRANA 40S ribosomal protein S15a OS=Brassica napus OX=3708 GN=RPS15A PE=2 SV=3 PF00410:Ribosomal protein S8	-
BjuVB02G45270	1.88244	2.23647	-	-	Q9LZ41|RL354_ARATH 60S ribosomal protein L35-4 OS=Arabidopsis thaliana OX=3702 GN=RPL35D PE=2 SV=1 PF00831:Ribosomal L29 protein	-
BjuVA10G24980	1.57447	-	-2.99621	-	Q94BZ1|ZIFL1_ARATH Protein ZINC INDUCED FACILITATOR-LIKE 1 OS=Arabidopsis thaliana OX=3702 GN=ZIFL1 PE=2 SV=1 PF07690:Major Facilitator Superfamily	MFS_1
BjuVB07G28970	-1.5829	-	-	-	Q9SUC9|UGPI7_ARATH Uncharacterized GPI-anchored protein At4g28100 OS=Arabidopsis thaliana OX=3702 GN=At4g28100 PE=2 SV=1 PF19160:SPARK	-
BjuVA07G40310	-1.15583	-	1.0938	-	Q9LE63|MY106_ARATH Transcription factor MYB106 OS=Arabidopsis thaliana OX=3702 GN=MYB106 PE=2 SV=1 PF00249:Myb-like DNA-binding domain	Myb_DNA-binding
BjuVA02G10360	-1.31593	-	-	-	Q9FMR3|NAC90_ARATH NAC domain-containing protein 90 OS=Arabidopsis thaliana OX=3702 GN=NAC090 PE=1 SV=1 PF02365:No apical meristem (NAM) protein	NAM
BjuVA10G33250	-1.39938	-	-	-1.39742	PF04520:Senescence regulator	-
BjuVA03G12880	-1.05331	1.58885	1.19665	2.0634	Q8VYK9|CKL12_ARATH Casein kinase 1-like protein 12 OS=Arabidopsis thaliana OX=3702 GN=CKL12 PE=2 SV=1 PF00069:Protein kinase domain	Pkinase
BjuVA07G39460	1.09406	-	-	-	-	-
BjuVA04G07140	-1.77567	-	-	-1.84971	-	-
BjuVA07G38370	-1.06716	-	1.0714	-	Q56WK6|PATL1_ARATH Patellin-1 OS=Arabidopsis thaliana OX=3702 GN=PATL1 PE=1 SV=2 PF00650:CRAL/TRIO domain|PF03765:CRAL/TRIO, N-terminal domain	CRAL_TRIO_N
BjuVA03G63690	-1.20284	-	-	-2.51845	-	-
BjuVB02G70410	1.33081	-	-	-	Q9M0E2|RL282_ARATH 60S ribosomal protein L28-2 OS=Arabidopsis thaliana OX=3702 GN=RPL28C PE=2 SV=1 PF01778:Ribosomal L28e protein family	-
BjuVA03G20640	1.13199	-	-	-	Q9SH88|RRS1_ARATH Ribosome biogenesis regulatory protein homolog OS=Arabidopsis thaliana OX=3702 GN=At2g37990 PE=2 SV=2 PF04939:Ribosome biogenesis regulatory protein (RRS1)	-
BjuVA01G07570	1.79242	-	-	-	-	-
BjuVA05G19070	1.08376	-	1.78892	2.90867	O04373|ILL4_ARATH IAA-amino acid hydrolase ILR1-like 4 OS=Arabidopsis thaliana OX=3702 GN=ILL4 PE=1 SV=2 PF01546:Peptidase family M20/M25/M40|PF07687:Peptidase dimerisation domain	Peptidase_M20
BjuVA03G15290	-1.31714	-	-	-	Q9LTE1|HIP14_ARATH Heavy metal-associated isoprenylated plant protein 14 OS=Arabidopsis thaliana OX=3702 GN=HIPP14 PE=2 SV=1 -	-
BjuVB03G33300	-2.73074	-	-	-1.46196	Q9LMM1|C86A4_ARATH Cytochrome P450 86A4 OS=Arabidopsis thaliana OX=3702 GN=CYP86A4 PE=1 SV=1 PF00067:Cytochrome P450	p450
BjuVA03G34130	1.13082	-	-	-	Q9C8Z4|HEAT1_ARATH Uncharacterized protein At3g06530 OS=Arabidopsis thaliana OX=3702 GN=At3g06530 PE=1 SV=3 PF08146:BP28CT (NUC211) domain|PF12397:U3 small nucleolar RNA-associated protein 10	-
BjuVA07G28430	-1.79512	-	-2.37241	-	-	-
BjuVB02G45660	1.1742	-	-	-	Q9LZM4|WAKLQ_ARATH Wall-associated receptor kinase-like 20 OS=Arabidopsis thaliana OX=3702 GN=WAKL20 PE=2 SV=1 PF02330:Mitochondrial glycoprotein|PF00069:Protein kinase domain	Pkinase
BjuVA06G04360	1.09904	-	-	-	Q00332|RS15A_BRANA 40S ribosomal protein S15a OS=Brassica napus OX=3708 GN=RPS15A PE=2 SV=3 PF00410:Ribosomal protein S8	-
BjuVB05G58070	1.62471	-	-	-	Q8LC69|ATL8_ARATH RING-H2 finger protein ATL8 OS=Arabidopsis thaliana OX=3702 GN=ATL8 PE=2 SV=2 PF13639:Ring finger domain	-
BjuVA09G67490	-1.3211	-	-	-	F4KHA2|RLP54_ARATH Receptor-like protein 54 OS=Arabidopsis thaliana OX=3702 GN=RLP54 PE=3 SV=1 PF13855:Leucine rich repeat	-
BjuVA07G01470	-1.11592	-	-	-	Q9SLD2|DGAT1_ARATH Diacylglycerol O-acyltransferase 1 OS=Arabidopsis thaliana OX=3702 GN=DGAT1 PE=1 SV=2 PF03062:MBOAT, membrane-bound O-acyltransferase family	MBOAT
BjuVA04G31370	1.05013	-1.71108	-	-3.16622	Q4FPT7|GPH_PSYA2 Phosphoglycolate phosphatase OS=Psychrobacter arcticus (strain DSM 17307 / VKM B-2377 / 273-4) OX=259536 GN=Psyc_2124 PE=3 SV=1 PF13419:Haloacid dehalogenase-like hydrolase	-
BjuVA04G31730	-2.8672	-	-	-	Q8VZ42|SAP11_ARATH Zinc finger AN1 and C2H2 domain-containing stress-associated protein 11 OS=Arabidopsis thaliana OX=3702 GN=SAP11 PE=2 SV=1 PF01428:AN1-like Zinc finger	zf-AN1
BjuVB07G08810	1.12287	-	-	-	Q9SCX8|PPA17_ARATH Purple acid phosphatase 17 OS=Arabidopsis thaliana OX=3702 GN=PAP17 PE=2 SV=1 PF00149:Calcineurin-like phosphoesterase	Metallophos
BjuVB04G19360	-1.39486	-	-	-	PF14364:Domain of unknown function (DUF4408)|PF05553:Cotton fibre expressed protein	-
BjuVB04G08490	1.12953	-	-	-	O81062|SIP_ARATH Signal peptide peptidase OS=Arabidopsis thaliana OX=3702 GN=SPP PE=2 SV=1 PF04258:Signal peptide peptidase	-
BjuVB03G17240	4.05521	-	-	-	Q8L743|G6PD3_ARATH Glucose-6-phosphate 1-dehydrogenase 3, chloroplastic OS=Arabidopsis thaliana OX=3702 GN=G6PD3 PE=1 SV=2 PF02781:Glucose-6-phosphate dehydrogenase, C-terminal domain|PF00479:Glucose-6-phosphate dehydrogenase, NAD binding domain	G6PD_C
BjuVA07G32500	-1.12664	-	-	-1.36656	PF04724:Glycosyltransferase family 17	-
BjuVA01G12000	-2.18135	-	-	3.25878	O49423|POT9_ARATH Potassium transporter 9 OS=Arabidopsis thaliana OX=3702 GN=POT9 PE=2 SV=2 PF02705:K+ potassium transporter	K_trans
BjuVA07G00890	-1.95032	-	-	-	O82188|RDR5_ARATH Probable RNA-dependent RNA polymerase 5 OS=Arabidopsis thaliana OX=3702 GN=RDR5 PE=2 SV=2 PF05183:RNA dependent RNA polymerase	-
BjuVB06G13000	-1.14826	-	-	1.74907	Q8GY63|DPNP3_ARATH Probable SAL3 phosphatase OS=Arabidopsis thaliana OX=3702 GN=SAL3 PE=2 SV=1 PF00459:Inositol monophosphatase family	-
BjuVB02G70800	-1.83029	-	-	-	P0CW78|HMA3B_ARATH Cadmium/zinc-transporting ATPase HMA3 OS=Arabidopsis thaliana OX=3702 GN=HMA3 PE=1 SV=1 PF00122:E1-E2 ATPase|PF00702:haloacid dehalogenase-like hydrolase	E1-E2_ATPase
BjuVB04G46020	-1.14261	-	-	-	Q9LJD9|AGP12_ARATH Arabinogalactan protein 12 OS=Arabidopsis thaliana OX=3702 GN=AGP12 PE=1 SV=1 -	-
BjuVB04G53470	1.10636	-	-	-	PF00582:Universal stress protein family	Usp
BjuVB03G07990	-3.26318	-	1.49403	-2.01356	Q9FXH5|PUP14_ARATH Purine permease 14 OS=Arabidopsis thaliana OX=3702 GN=PUP14 PE=1 SV=1 PF16913:Purine nucleobase transmembrane transport	-
BjuVB06G46600	1.18509	-	-	-	O76021|RL1D1_HUMAN Ribosomal L1 domain-containing protein 1 OS=Homo sapiens OX=9606 GN=RSL1D1 PE=1 SV=3 PF00687:Ribosomal protein L1p/L10e family	-
BjuVA06G41280	-1.99588	-	3.3921	1.5193	Q9LTM1|C71BM_ARATH Cytochrome P450 71B22 OS=Arabidopsis thaliana OX=3702 GN=CYP71B22 PE=2 SV=1 PF00067:Cytochrome P450	p450
BjuVB07G00680	-1.23631	-	-	-	Q9SQR3|D14_ARATH Strigolactone esterase D14 OS=Arabidopsis thaliana OX=3702 GN=D14 PE=1 SV=1 PF12697:Alpha/beta hydrolase family	-
BjuVA01G33150	1.91584	-	-	-	Q4FE47|XB35_ARATH Putative E3 ubiquitin-protein ligase XBAT35 OS=Arabidopsis thaliana OX=3702 GN=XBAT35 PE=2 SV=1 PF13920:Zinc finger, C3HC4 type (RING finger)|PF13857:Ankyrin repeats (many copies)	-
BjuVB03G20220	-3.32514	-	-	-	Q5BH69|SYF1_EMENI Pre-mRNA-splicing factor syf1 OS=Emericella nidulans (strain FGSC A4 / ATCC 38163 / CBS 112.46 / NRRL 194 / M139) OX=227321 GN=syf1 PE=3 SV=1 -	-
BjuVA05G30070	-1.49731	-	-	-	C0LGP4|Y3475_ARATH Probable LRR receptor-like serine/threonine-protein kinase At3g47570 OS=Arabidopsis thaliana OX=3702 GN=At3g47570 PE=2 SV=1 PF08263:Leucine rich repeat N-terminal domain|PF00069:Protein kinase domain	Pkinase
BjuVA09G03220	-1.14197	-	1.36893	-	Q9LJP4|CSLC4_ARATH Xyloglucan glycosyltransferase 4 OS=Arabidopsis thaliana OX=3702 GN=CSLC4 PE=1 SV=1 PF13632:Glycosyl transferase family group 2	-
BjuVB03G59120	-1.53889	-	-	-	O82275|TAX1_ARATH Signaling peptide TAXIMIN 1 OS=Arabidopsis thaliana OX=3702 GN=TAX1 PE=2 SV=2 -	-
BjuVB02G49080	1.00297	-	-	-	P42795|RL111_ARATH 60S ribosomal protein L11-1 OS=Arabidopsis thaliana OX=3702 GN=RPL11A PE=2 SV=2 PF00673:ribosomal L5P family C-terminus|PF00281:Ribosomal protein L5	-
BjuVA06G39160	-2.20606	-	-	-	Q93Z27|CML46_ARATH Probable calcium-binding protein CML46 OS=Arabidopsis thaliana OX=3702 GN=CML46 PE=1 SV=1 PF13499:EF-hand domain pair	-
BjuVA05G07160	-1.48271	-	-	-	-	-
BjuVB04G08550	1.14408	-	-	-	Q9SWI1|PKS1_ARATH Protein PHYTOCHROME KINASE SUBSTRATE 1 OS=Arabidopsis thaliana OX=3702 GN=PKS1 PE=1 SV=2 -	-
BjuVA07G34700	-1.23547	-	-	-	Q8LB88|RGLG5_ARATH E3 ubiquitin-protein ligase RGLG5 OS=Arabidopsis thaliana OX=3702 GN=RGLG5 PE=1 SV=1 PF07002:Copine|PF13920:Zinc finger, C3HC4 type (RING finger)	-
BjuVA02G49480	-2.20508	-	-3.04216	-2.98279	Q9LVR5|MCU3_ARATH Calcium uniporter protein 3, mitochondrial OS=Arabidopsis thaliana OX=3702 GN=At5g66650 PE=2 SV=1 PF04678:Mitochondrial calcium uniporter	-
BjuVA03G59310	-1.31266	-	-	-	O65554|CIPK6_ARATH CBL-interacting serine/threonine-protein kinase 6 OS=Arabidopsis thaliana OX=3702 GN=CIPK6 PE=1 SV=1 PF00069:Protein kinase domain|PF03822:NAF domain	Pkinase
BjuVA07G40060	1.46437	1.76489	2.61783	3.54266	Q9C9D0|SOT16_ARATH Cytosolic sulfotransferase 16 OS=Arabidopsis thaliana OX=3702 GN=SOT16 PE=1 SV=1 PF00685:Sulfotransferase domain	Sulfotransfer_1
BjuVB05G18190	1.06396	-	-1.81258	-1.66111	O49687|MYC4_ARATH Transcription factor MYC4 OS=Arabidopsis thaliana OX=3702 GN=MYC4 PE=1 SV=1 PF14215:bHLH-MYC and R2R3-MYB transcription factors N-terminal|PF00010:Helix-loop-helix DNA-binding domain	HLH
BjuVB06G45880	-5.80033	-	-	-	Q9M1X9|ASHH4_ARATH Putative histone-lysine N-methyltransferase ASHH4 OS=Arabidopsis thaliana OX=3702 GN=ASHH4 PE=3 SV=1 PF00856:SET domain	SET
[truncated: 6,944 more rows]

## Sheet: Sheet1
-	&&	sp|	Q9LHA8|HS704_ARATH Heat shock 70 kDa protein 4 OS=Arabidopsis thaliana OX=3702 GN=HSP70-4 PE=1 SV=1 && PF00012:Hsp70 protein
-	&&	sp|	Q9LHA8|HS704_ARATH Heat shock 70 kDa protein 4 OS=Arabidopsis thaliana OX=3702 GN=HSP70-4 PE=1 SV=1 && PF00012:Hsp70 protein
-	&&	sp|	Q9LHA8|HS704_ARATH Heat shock 70 kDa protein 4 OS=Arabidopsis thaliana OX=3702 GN=HSP70-4 PE=1 SV=1 && PF00012:Hsp70 protein
-	&&	sp|	Q9LHA8|HS704_ARATH Heat shock 70 kDa protein 4 OS=Arabidopsis thaliana OX=3702 GN=HSP70-4 PE=1 SV=1 && PF00012:Hsp70 protein
-	&&	sp|	P55737|HS902_ARATH Heat shock protein 90-2 OS=Arabidopsis thaliana OX=3702 GN=HSP90-2 PE=1 SV=1 && PF00183:Hsp90 protein|PF02518:Histidine kinase-, DNA gyrase B-, and HSP90-like ATPase
-	&&	sp|	P55737|HS902_ARATH Heat shock protein 90-2 OS=Arabidopsis thaliana OX=3702 GN=HSP90-2 PE=1 SV=1 && PF00183:Hsp90 protein|PF02518:Histidine kinase-, DNA gyrase B-, and HSP90-like ATPase
-	&&	sp|	Q9ZW31|HS17B_ARATH 17.6 kDa class I heat shock protein 2 OS=Arabidopsis thaliana OX=3702 GN=HSP17.6B PE=2 SV=1 && PF00011:Hsp20/alpha crystallin family
-	&&	sp|	P22954|HS702_ARATH Heat shock 70 kDa protein 2 OS=Arabidopsis thaliana OX=3702 GN=HSP70-2 PE=1 SV=2 && PF00012:Hsp70 protein
-	&&	- &	& PF04632:Fusaric acid resistance protein family
-	&&	sp|	Q39043|BIP2_ARATH Heat shock 70 kDa protein BIP2 OS=Arabidopsis thaliana OX=3702 GN=BIP2 PE=1 SV=2 && PF00012:Hsp70 protein
-	&&	sp|	Q8LPL3|ASO_ARATH L-ascorbate oxidase OS=Arabidopsis thaliana OX=3702 GN=AAO PE=1 SV=1 && PF07731:Multicopper oxidase|PF07732:Multicopper oxidase|PF00394:Multicopper oxidase
-	&&	sp|	Q9FH76|ABAH3_ARATH Abscisic acid 8'-hydroxylase 3 OS=Arabidopsis thaliana OX=3702 GN=CYP707A3 PE=1 SV=1 && PF00067:Cytochrome P450
-	&&	sp|	Q39043|BIP2_ARATH Heat shock 70 kDa protein BIP2 OS=Arabidopsis thaliana OX=3702 GN=BIP2 PE=1 SV=2 && PF00012:Hsp70 protein
-	&&	sp|	Q9FH76|ABAH3_ARATH Abscisic acid 8'-hydroxylase 3 OS=Arabidopsis thaliana OX=3702 GN=CYP707A3 PE=1 SV=1 && PF00067:Cytochrome P450
-	&&	sp|	Q9ZNS4|PRB1_ARATH Pathogenesis-related protein 1 OS=Arabidopsis thaliana OX=3702 GN=PRB1 PE=2 SV=1 && PF00188:Cysteine-rich secretory protein family
-	&&	sp|	Q9ZW31|HS17B_ARATH 17.6 kDa class I heat shock protein 2 OS=Arabidopsis thaliana OX=3702 GN=HSP17.6B PE=2 SV=1 && PF00011:Hsp20/alpha crystallin family
-	&&	sp|	Q9FKW4|CDPKS_ARATH Calcium-dependent protein kinase 28 OS=Arabidopsis thaliana OX=3702 GN=CPK28 PE=1 SV=1 && PF00069:Protein kinase domain
-	&&	sp|	P55737|HS902_ARATH Heat shock protein 90-2 OS=Arabidopsis thaliana OX=3702 GN=HSP90-2 PE=1 SV=1 && PF02518:Histidine kinase-, DNA gyrase B-, and HSP90-like ATPase|PF00183:Hsp90 protein
-	&&	sp|	Q9FJL3|FKB65_ARATH Peptidyl-prolyl cis-trans isomerase FKBP65 OS=Arabidopsis thaliana OX=3702 GN=FKBP65 PE=1 SV=1 && PF00254:FKBP-type peptidyl-prolyl cis-trans isomerase
-	&&	sp|	Q9FH76|ABAH3_ARATH Abscisic acid 8'-hydroxylase 3 OS=Arabidopsis thaliana OX=3702 GN=CYP707A3 PE=1 SV=1 && PF00067:Cytochrome P450
-	&&	sp|	P29402|CALX1_ARATH Calnexin homolog 1 OS=Arabidopsis thaliana OX=3702 GN=CNX1 PE=1 SV=1 && PF00262:Calreticulin family
-	&&	sp|	F4I594|RLM1A_ARATH Disease resistance protein RML1A OS=Arabidopsis thaliana OX=3702 GN=RLM1A PE=3 SV=1 && PF01582:TIR domain|PF13499:EF-hand domain pair
-	&&	sp|	Q9LY00|WRK70_ARATH Probable WRKY transcription factor 70 OS=Arabidopsis thaliana OX=3702 GN=WRKY70 PE=1 SV=1 && PF03106:WRKY DNA -binding domain
-	&&	sp|	Q9STH1|HSOP3_ARATH Hsp70-Hsp90 organizing protein 3 OS=Arabidopsis thaliana OX=3702 GN=HOP3 PE=2 SV=1 && PF17830:STI1 domain|PF00515:Tetratricopeptide repeat|PF13414:TPR repeat
-	&&	sp|	Q7PC86|AB35G_ARATH ABC transporter G family member 35 OS=Arabidopsis thaliana OX=3702 GN=ABCG35 PE=2 SV=1 && PF08370:Plant PDR ABC transporter associated|PF14510:ABC-transporter N-terminal|PF19055:ABC-2 type transporter|PF00005:ABC transporter|PF01061:ABC-2 type transporter
-	&&	sp|	Q9ZPE7|EXO_ARATH Protein EXORDIUM OS=Arabidopsis thaliana OX=3702 GN=EXO PE=2 SV=1 && PF04674:Phosphate-induced protein 1 conserved region
-	&&	sp|	Q9C7N4|GDL15_ARATH GDSL esterase/lipase At1g29670 OS=Arabidopsis thaliana OX=3702 GN=At1g29670 PE=2 SV=1 && PF00657:GDSL-like Lipase/Acylhydrolase
-	&&	sp|	P22953|HS701_ARATH Heat shock 70 kDa protein 1 OS=Arabidopsis thaliana OX=3702 GN=HSP70-1 PE=1 SV=3 && PF00012:Hsp70 protein
-	&&	sp|	Q42641|NLTPA_BRAOT Non-specific lipid-transfer protein A OS=Brassica oleracea var. italica OX=36774 GN=WAX9A PE=3 SV=1 && PF00234:Protease inhibitor/seed storage/LTP family
-	&&	- &	& PF04601:Domain of unknown function (DUF569)
-	&&	sp|	Q04980|LTI65_ARATH Low-temperature-induced 65 kDa protein OS=Arabidopsis thaliana OX=3702 GN=LTI65 PE=2 SV=2 && -
-	&&	sp|	P22953|HS701_ARATH Heat shock 70 kDa protein 1 OS=Arabidopsis thaliana OX=3702 GN=HSP70-1 PE=1 SV=3 && PF00012:Hsp70 protein
-	&&	sp|	Q9SKD9|WRK46_ARATH Probable WRKY transcription factor 46 OS=Arabidopsis thaliana OX=3702 GN=WRKY46 PE=1 SV=1 && PF03106:WRKY DNA -binding domain
-	&&	sp|	Q9LDH1|SIB1_ARATH Sigma factor binding protein 1, chloroplastic OS=Arabidopsis thaliana OX=3702 GN=SIB1 PE=1 SV=1 && PF05678:VQ motif
-	&&	sp|	Q9SRH6|HIR3_ARATH Hypersensitive-induced response protein 3 OS=Arabidopsis thaliana OX=3702 GN=HIR3 PE=1 SV=1 && PF01145:SPFH domain / Band 7 family
-	&&	sp|	Q9LLR6|NLTP4_ARATH Non-specific lipid-transfer protein 4 OS=Arabidopsis thaliana OX=3702 GN=LTP4 PE=3 SV=1 && PF00234:Protease inhibitor/seed storage/LTP family
-	&&	sp|	Q6NLQ6|CDPKW_ARATH Calcium-dependent protein kinase 32 OS=Arabidopsis thaliana OX=3702 GN=CPK32 PE=1 SV=1 && PF13499:EF-hand domain pair|PF00069:Protein kinase domain
-	&&	sp|	Q39119|VPEG_ARATH Vacuolar-processing enzyme gamma-isozyme OS=Arabidopsis thaliana OX=3702 GN=At4g32940 PE=1 SV=2 && PF01650:Peptidase C13 family
-	&&	sp|	Q9LVR5|MCU3_ARATH Calcium uniporter protein 3, mitochondrial OS=Arabidopsis thaliana OX=3702 GN=At5g66650 PE=2 SV=1 && PF04678:Mitochondrial calcium uniporter
-	&&	sp|	Q9LY00|WRK70_ARATH Probable WRKY transcription factor 70 OS=Arabidopsis thaliana OX=3702 GN=WRKY70 PE=1 SV=1 && PF03106:WRKY DNA -binding domain
-	&&	sp|	Q39043|BIP2_ARATH Heat shock 70 kDa protein BIP2 OS=Arabidopsis thaliana OX=3702 GN=BIP2 PE=1 SV=2 && PF00012:Hsp70 protein
-	&&	sp|	Q39043|BIP2_ARATH Heat shock 70 kDa protein BIP2 OS=Arabidopsis thaliana OX=3702 GN=BIP2 PE=1 SV=2 && PF00012:Hsp70 protein
-	&&	sp|	Q25AG5|ERG3_ORYSI Elicitor-responsive protein 3 OS=Oryza sativa subsp. indica OX=39946 GN=ERG3 PE=2 SV=1 && PF01585:G-patch domain|PF00168:C2 domain
-	&&	sp|	Q7PC86|AB35G_ARATH ABC transporter G family member 35 OS=Arabidopsis thaliana OX=3702 GN=ABCG35 PE=2 SV=1 && PF08370:Plant PDR ABC transporter associated|PF19055:ABC-2 type transporter|PF14510:ABC-transporter N-terminal|PF00005:ABC transporter|PF01061:ABC-2 type transporter
-	&&	- &	& PF04632:Fusaric acid resistance protein family
-	&&	sp|	Q8S9J6|ASPA_ARATH Aspartyl protease family protein At5g10770 OS=Arabidopsis thaliana OX=3702 GN=At5g10770 PE=2 SV=1 && PF00026:Eukaryotic aspartyl protease
-	&&	sp|	P22954|HS702_ARATH Heat shock 70 kDa protein 2 OS=Arabidopsis thaliana OX=3702 GN=HSP70-2 PE=1 SV=2 && PF00012:Hsp70 protein
-	&&	sp|	Q9S9T6|FB220_ARATH F-box protein At4g05010 OS=Arabidopsis thaliana OX=3702 GN=At4g05010 PE=2 SV=1 && -
-	&&	sp|	Q9LY00|WRK70_ARATH Probable WRKY transcription factor 70 OS=Arabidopsis thaliana OX=3702 GN=WRKY70 PE=1 SV=1 && PF03106:WRKY DNA -binding domain
-	&&	sp|	Q9FNH6|NHL3_ARATH NDR1/HIN1-like protein 3 OS=Arabidopsis thaliana OX=3702 GN=NHL3 PE=1 SV=1 && PF03168:Late embryogenesis abundant protein
-	&&	sp|	Q8GWK5|GASA9_ARATH Gibberellin-regulated protein 9 OS=Arabidopsis thaliana OX=3702 GN=GASA9 PE=3 SV=1 && PF02704:Gibberellin regulated protein
-	&&	sp|	P22953|HS701_ARATH Heat shock 70 kDa protein 1 OS=Arabidopsis thaliana OX=3702 GN=HSP70-1 PE=1 SV=3 && PF00012:Hsp70 protein
-	&&	sp|	Q9ZVD2|NHL13_ARATH NDR1/HIN1-like protein 13 OS=Arabidopsis thaliana OX=3702 GN=NHL13 PE=2 SV=1 && PF03168:Late embryogenesis abundant protein
-	&&	sp|	P22954|HS702_ARATH Heat shock 70 kDa protein 2 OS=Arabidopsis thaliana OX=3702 GN=HSP70-2 PE=1 SV=2 && PF00012:Hsp70 protein
-	&&	sp|	P46421|GSTU5_ARATH Glutathione S-transferase U5 OS=Arabidopsis thaliana OX=3702 GN=GSTU5 PE=2 SV=1 && PF02798:Glutathione S-transferase, N-terminal domain
-	&&	sp|	Q9M126|NAC69_ARATH NAC domain-containing protein 69 OS=Arabidopsis thaliana OX=3702 GN=NAC69 PE=1 SV=1 && PF02365:No apical meristem (NAM) protein
-	&&	- &	& PF04862:Protein of unknown function (DUF642)
-	&&	sp|	O65727|ERG11_BRANA Squalene monooxygenase 1,1 OS=Brassica napus OX=3708 GN=SQP1,1 PE=2 SV=1 && PF08491:Squalene epoxidase|PF13450:NAD(P)-binding Rossmann-like domain
-	&&	sp|	Q9LDR9|EXP10_ARATH Expansin-A10 OS=Arabidopsis thaliana OX=3702 GN=EXPA10 PE=2 SV=1 && PF03330:Lytic transglycolase|PF01357:Expansin C-terminal domain
-	&&	sp|	O04151|CALR1_ARATH Calreticulin-1 OS=Arabidopsis thaliana OX=3702 GN=CRT1 PE=1 SV=1 && PF00262:Calreticulin family
-	&&	sp|	P22953|HS701_ARATH Heat shock 70 kDa protein 1 OS=Arabidopsis thaliana OX=3702 GN=HSP70-1 PE=1 SV=3 && PF00012:Hsp70 protein
-	&&	sp|	P29402|CALX1_ARATH Calnexin homolog 1 OS=Arabidopsis thaliana OX=3702 GN=CNX1 PE=1 SV=1 && PF00262:Calreticulin family
-	&&	sp|	P92994|TCMO_ARATH Trans-cinnamate 4-monooxygenase OS=Arabidopsis thaliana OX=3702 GN=CYP73A5 PE=1 SV=1 && PF00067:Cytochrome P450
-	&&	sp|	Q39043|BIP2_ARATH Heat shock 70 kDa protein BIP2 OS=Arabidopsis thaliana OX=3702 GN=BIP2 PE=1 SV=2 && PF00012:Hsp70 protein
-	&&	sp|	Q6R8G7|PHO13_ARATH Phosphate transporter PHO1 homolog 3 OS=Arabidopsis thaliana OX=3702 GN=PHO1;H3 PE=2 SV=2 && PF03105:SPX domain|PF03124:EXS family
-	&&	sp|	Q9LFC6|FRB1_ARATH Protein FRIABLE 1 OS=Arabidopsis thaliana OX=3702 GN=FRB1 PE=2 SV=1 && PF10250:GDP-fucose protein O-fucosyltransferase
-	&&	sp|	Q9SB52|PUMP4_ARATH Mitochondrial uncoupling protein 4 OS=Arabidopsis thaliana OX=3702 GN=PUMP4 PE=2 SV=1 && PF00153:Mitochondrial carrier protein
-	&&	sp|	Q39119|VPEG_ARATH Vacuolar-processing enzyme gamma-isozyme OS=Arabidopsis thaliana OX=3702 GN=At4g32940 PE=1 SV=2 && PF01650:Peptidase C13 family
-	&&	- &	& PF04601:Domain of unknown function (DUF569)
-	&&	sp|	Q9CAR7|HIR2_ARATH Hypersensitive-induced response protein 2 OS=Arabidopsis thaliana OX=3702 GN=HIR2 PE=1 SV=1 && PF01145:SPFH domain / Band 7 family
-	&&	sp|	Q96331|HS23M_ARATH 23.6 kDa heat shock protein, mitochondrial OS=Arabidopsis thaliana OX=3702 GN=HSP23.6 PE=2 SV=1 && PF00011:Hsp20/alpha crystallin family
-	&&	sp|	P55737|HS902_ARATH Heat shock protein 90-2 OS=Arabidopsis thaliana OX=3702 GN=HSP90-2 PE=1 SV=1 && PF02518:Histidine kinase-, DNA gyrase B-, and HSP90-like ATPase|PF00183:Hsp90 protein
-	&&	sp|	O04151|CALR1_ARATH Calreticulin-1 OS=Arabidopsis thaliana OX=3702 GN=CRT1 PE=1 SV=1 && PF00262:Calreticulin family
-	&&	sp|	Q8RWT0|LUP2_ARATH Amyrin synthase LUP2 OS=Arabidopsis thaliana OX=3702 GN=LUP2 PE=1 SV=1 && PF13249:Squalene-hopene cyclase N-terminal domain|PF13243:Squalene-hopene cyclase C-terminal domain
-	&&	sp|	Q9FKW4|CDPKS_ARATH Calcium-dependent protein kinase 28 OS=Arabidopsis thaliana OX=3702 GN=CPK28 PE=1 SV=1 && PF13499:EF-hand domain pair|PF00069:Protein kinase domain
-	&&	sp|	Q9CAK1|RLM1B_ARATH Disease resistance protein RML1B OS=Arabidopsis thaliana OX=3702 GN=RLM1B PE=2 SV=1 && PF13499:EF-hand domain pair|PF01582:TIR domain
-	&&	sp|	Q9CAK4|ROH1_ARATH Protein ROH1 OS=Arabidopsis thaliana OX=3702 GN=ROH1 PE=1 SV=1 && PF05633:Protein BYPASS1-related
-	&&	- &	& -
-	&&	sp|	Q9STX5|ENPL_ARATH Endoplasmin homolog OS=Arabidopsis thaliana OX=3702 GN=HSP90-7 PE=1 SV=1 && PF02518:Histidine kinase-, DNA gyrase B-, and HSP90-like ATPase|PF00183:Hsp90 protein
-	&&	- &	& PF12043:Domain of unknown function (DUF3527)
-	&&	sp|	Q39043|BIP2_ARATH Heat shock 70 kDa protein BIP2 OS=Arabidopsis thaliana OX=3702 GN=BIP2 PE=1 SV=2 && PF00012:Hsp70 protein
-	&&	sp|	P38418|LOX2_ARATH Lipoxygenase 2, chloroplastic OS=Arabidopsis thaliana OX=3702 GN=LOX2 PE=1 SV=1 && PF00305:Lipoxygenase
-	&&	sp|	Q9FKW4|CDPKS_ARATH Calcium-dependent protein kinase 28 OS=Arabidopsis thaliana OX=3702 GN=CPK28 PE=1 SV=1 && PF00069:Protein kinase domain|PF13499:EF-hand domain pair
-	&&	sp|	Q9FUS8|GSTUH_ARATH Glutathione S-transferase U17 OS=Arabidopsis thaliana OX=3702 GN=GSTU17 PE=2 SV=1 && PF02798:Glutathione S-transferase, N-terminal domain|PF00043:Glutathione S-transferase, C-terminal domain
-	&&	sp|	Q42642|NLTPB_BRAOT Non-specific lipid-transfer protein B OS=Brassica oleracea var. italica OX=36774 GN=WAX9B PE=3 SV=1 && PF00234:Protease inhibitor/seed storage/LTP family
-	&&	sp|	Q8S8Q6|TET8_ARATH Tetraspanin-8 OS=Arabidopsis thaliana OX=3702 GN=TET8 PE=2 SV=1 && PF00335:Tetraspanin family
-	&&	sp|	Q08298|RD22_ARATH BURP domain protein RD22 OS=Arabidopsis thaliana OX=3702 GN=RD22 PE=2 SV=1 && PF03181:BURP domain
-	&&	sp|	Q9LLR7|NLTP3_ARATH Non-specific lipid-transfer protein 3 OS=Arabidopsis thaliana OX=3702 GN=LTP3 PE=3 SV=1 && PF00234:Protease inhibitor/seed storage/LTP family
-	&&	sp|	O04536|GATL9_ARATH Probable galacturonosyltransferase-like 9 OS=Arabidopsis thaliana OX=3702 GN=GATL9 PE=2 SV=1 && PF01501:Glycosyl transferase family 8
-	&&	- &	& -
-	&&	- &	& -
-	&&	sp|	Q93WU8|WRK54_ARATH Probable WRKY transcription factor 54 OS=Arabidopsis thaliana OX=3702 GN=WRKY54 PE=1 SV=2 && PF03106:WRKY DNA -binding domain
-	&&	sp|	Q9LIB6|COBL8_ARATH COBRA-like protein 8 OS=Arabidopsis thaliana OX=3702 GN=COBL8 PE=2 SV=1 && PF04833:COBRA-like protein
-	&&	- &	& PF03107:C1 domain
-	&&	- &	& PF04398:Protein of unknown function, DUF538
-	&&	sp|	Q9LK62|AB7C_ARATH ABC transporter C family member 7 OS=Arabidopsis thaliana OX=3702 GN=ABCC7 PE=1 SV=1 && PF06426:Serine acetyltransferase, N-terminal|PF00132:Bacterial transferase hexapeptide (six repeats)|PF00664:ABC transporter transmembrane region|PF00005:ABC transporter
-	&&	sp|	Q9SJY5|PUMP5_ARATH Mitochondrial uncoupling protein 5 OS=Arabidopsis thaliana OX=3702 GN=PUMP5 PE=2 SV=1 && PF00153:Mitochondrial carrier protein
-	&&	sp|	P46421|GSTU5_ARATH Glutathione S-transferase U5 OS=Arabidopsis thaliana OX=3702 GN=GSTU5 PE=2 SV=1 && PF13417:Glutathione S-transferase, N-terminal domain
-	&&	sp|	Q9M9S6|UTR3_ARATH UDP-galactose/UDP-glucose transporter 3 OS=Arabidopsis thaliana OX=3702 GN=UTR3 PE=1 SV=1 && PF08449:UAA transporter family
-	&&	sp|	P47735|RLK5_ARATH Receptor-like protein kinase 5 OS=Arabidopsis thaliana OX=3702 GN=RLK5 PE=1 SV=1 && PF08263:Leucine rich repeat N-terminal domain|PF13855:Leucine rich repeat|PF00069:Protein kinase domain
-	&&	sp|	Q9ZPE7|EXO_ARATH Protein EXORDIUM OS=Arabidopsis thaliana OX=3702 GN=EXO PE=2 SV=1 && PF04674:Phosphate-induced protein 1 conserved region
-	&&	sp|	Q9LY00|WRK70_ARATH Probable WRKY transcription factor 70 OS=Arabidopsis thaliana OX=3702 GN=WRKY70 PE=1 SV=1 && PF03106:WRKY DNA -binding domain
-	&&	sp|	Q9SKD9|WRK46_ARATH Probable WRKY transcription factor 46 OS=Arabidopsis thaliana OX=3702 GN=WRKY46 PE=1 SV=1 && PF03106:WRKY DNA -binding domain
-	&&	sp|	Q93V51|PSE1_ARATH Protein LEAD-SENSITIVE 1 OS=Arabidopsis thaliana OX=3702 GN=PSE1 PE=2 SV=1 && PF04970:Lecithin retinol acyltransferase
-	&&	- &	& -
-	&&	sp|	O80683|CAB25_ARATH Calmodulin-binding protein 25 OS=Arabidopsis thaliana OX=3702 GN=CAMBP25 PE=1 SV=1 && PF05678:VQ motif
-	&&	sp|	F4JMJ1|HSP7R_ARATH Heat shock 70 kDa protein 17 OS=Arabidopsis thaliana OX=3702 GN=HSP70-17 PE=2 SV=1 && PF00012:Hsp70 protein
-	&&	sp|	Q9FIJ0|RBOHD_ARATH Respiratory burst oxidase homolog protein D OS=Arabidopsis thaliana OX=3702 GN=RBOHD PE=1 SV=1 && PF08414:Respiratory burst NADPH oxidase|PF01794:Ferric reductase like transmembrane component|PF08030:Ferric reductase NAD binding domain|PF08022:FAD-binding domain
-	&&	sp|	Q9LHD2|GATLA_ARATH Probable galacturonosyltransferase-like 10 OS=Arabidopsis thaliana OX=3702 GN=GATL10 PE=2 SV=1 && PF01501:Glycosyl transferase family 8
-	&&	sp|	O23255|SAHH1_ARATH Adenosylhomocysteinase 1 OS=Arabidopsis thaliana OX=3702 GN=SAHH1 PE=1 SV=1 && PF05221:S-adenosyl-L-homocysteine hydrolase|PF00670:S-adenosyl-L-homocysteine hydrolase, NAD binding domain
-	&&	sp|	Q9FKW4|CDPKS_ARATH Calcium-dependent protein kinase 28 OS=Arabidopsis thaliana OX=3702 GN=CPK28 PE=1 SV=1 && PF13499:EF-hand domain pair|PF00069:Protein kinase domain
-	&&	sp|	Q9SJL8|METK3_ARATH S-adenosylmethionine synthase 3 OS=Arabidopsis thaliana OX=3702 GN=METK3 PE=1 SV=1 && PF02773:S-adenosylmethionine synthetase, C-terminal domain|PF02772:S-adenosylmethionine synthetase, central domain|PF00438:S-adenosylmethionine synthetase, N-terminal domain
-	&&	sp|	Q9LDH1|SIB1_ARATH Sigma factor binding protein 1, chloroplastic OS=Arabidopsis thaliana OX=3702 GN=SIB1 PE=1 SV=1 && PF05678:VQ motif
-	&&	sp|	P29402|CALX1_ARATH Calnexin homolog 1 OS=Arabidopsis thaliana OX=3702 GN=CNX1 PE=1 SV=1 && PF00262:Calreticulin family
-	&&	sp|	F4JTB3|DTX35_ARATH Protein DETOXIFICATION 35 OS=Arabidopsis thaliana OX=3702 GN=DTX35 PE=1 SV=1 && PF01554:MatE
-	&&	sp|	P92994|TCMO_ARATH Trans-cinnamate 4-monooxygenase OS=Arabidopsis thaliana OX=3702 GN=CYP73A5 PE=1 SV=1 && PF00067:Cytochrome P450
-	&&	sp|	Q38931|FKB62_ARATH Peptidyl-prolyl cis-trans isomerase FKBP62 OS=Arabidopsis thaliana OX=3702 GN=FKBP62 PE=1 SV=2 && PF00515:Tetratricopeptide repeat|PF00254:FKBP-type peptidyl-prolyl cis-trans isomerase
-	&&	sp|	F4JNX2|SDEH4_ARATH Senescence/dehydration-associated protein At4g35985, chloroplastic OS=Arabidopsis thaliana OX=3702 GN=P85 PE=2 SV=1 && PF06911:Senescence-associated protein
-	&&	- &	& PF03107:C1 domain
-	&&	sp|	Q39023|MPK3_ARATH Mitogen-activated protein kinase 3 OS=Arabidopsis thaliana OX=3702 GN=MPK3 PE=1 SV=2 && PF00069:Protein kinase domain
-	&&	sp|	Q9FT51|AB27G_ARATH ABC transporter G family member 27 OS=Arabidopsis thaliana OX=3702 GN=ABCG27 PE=2 SV=1 && PF19055:ABC-2 type transporter|PF01061:ABC-2 type transporter|PF00005:ABC transporter
-	&&	sp|	Q93WU8|WRK54_ARATH Probable WRKY transcription factor 54 OS=Arabidopsis thaliana OX=3702 GN=WRKY54 PE=1 SV=2 && PF03106:WRKY DNA -binding domain
-	&&	sp|	Q9M9S6|UTR3_ARATH UDP-galactose/UDP-glucose transporter 3 OS=Arabidopsis thaliana OX=3702 GN=UTR3 PE=1 SV=1 && PF08449:UAA transporter family
-	&&	sp|	Q43304|NLTPD_BRAOT Non-specific lipid-transfer protein D OS=Brassica oleracea var. italica OX=36774 GN=WAX9D PE=3 SV=1 && PF00234:Protease inhibitor/seed storage/LTP family
-	&&	- &	& -
-	&&	sp|	Q25AG5|ERG3_ORYSI Elicitor-responsive protein 3 OS=Oryza sativa subsp. indica OX=39946 GN=ERG3 PE=2 SV=1 && PF00168:C2 domain
-	&&	sp|	Q9C699|RLP7_ARATH Receptor-like protein 7 OS=Arabidopsis thaliana OX=3702 GN=RLP7 PE=3 SV=2 && PF08263:Leucine rich repeat N-terminal domain|PF13855:Leucine rich repeat
-	&&	sp|	Q9CAK4|ROH1_ARATH Protein ROH1 OS=Arabidopsis thaliana OX=3702 GN=ROH1 PE=1 SV=1 && PF05633:Protein BYPASS1-related
-	&&	sp|	Q9SII6|PIX13_ARATH Probable serine/threonine-protein kinase PIX13 OS=Arabidopsis thaliana OX=3702 GN=PIX13 PE=1 SV=2 && PF07714:Protein tyrosine and serine/threonine kinase
-	&&	sp|	Q9FMS6|CAF1K_ARATH Probable CCR4-associated factor 1 homolog 11 OS=Arabidopsis thaliana OX=3702 GN=CAF1-11 PE=2 SV=1 && PF04857:CAF1 family ribonuclease
-	&&	sp|	Q9C7N4|GDL15_ARATH GDSL esterase/lipase At1g29670 OS=Arabidopsis thaliana OX=3702 GN=At1g29670 PE=2 SV=1 && PF00657:GDSL-like Lipase/Acylhydrolase
-	&&	sp|	Q9FG87|KCS20_ARATH 3-ketoacyl-CoA synthase 20 OS=Arabidopsis thaliana OX=3702 GN=KCS20 PE=2 SV=1 && PF08541:3-Oxoacyl-[acyl-carrier-protein (ACP)] synthase III C terminal|PF08392:FAE1/Type III polyketide synthase-like protein
-	&&	sp|	Q9LSD8|MUB4_ARATH Membrane-anchored ubiquitin-fold protein 4 OS=Arabidopsis thaliana OX=3702 GN=MUB4 PE=1 SV=1 && PF13881:Ubiquitin-2 like Rad60 SUMO-like
-	&&	sp|	Q9SH93|IPCS2_ARATH Phosphatidylinositol:ceramide inositolphosphotransferase 2 OS=Arabidopsis thaliana OX=3702 GN=IPCS2 PE=1 SV=1 && PF14360:PAP2 superfamily C-terminal
-	&&	sp|	Q9ZU50|BAT1_ARATH Amino-acid permease BAT1 OS=Arabidopsis thaliana OX=3702 GN=BAT1 PE=2 SV=2 && PF13520:Amino acid permease
-	&&	sp|	P22953|HS701_ARATH Heat shock 70 kDa protein 1 OS=Arabidopsis thaliana OX=3702 GN=HSP70-1 PE=1 SV=3 && PF00012:Hsp70 protein
-	&&	sp|	Q9SJY5|PUMP5_ARATH Mitochondrial uncoupling protein 5 OS=Arabidopsis thaliana OX=3702 GN=PUMP5 PE=2 SV=1 && PF00153:Mitochondrial carrier protein
-	&&	sp|	B3H4P1|PP450_ARATH Pentatricopeptide repeat-containing protein At5g66631 OS=Arabidopsis thaliana OX=3702 GN=At5g66631 PE=2 SV=1 && PF13041:PPR repeat family|PF04678:Mitochondrial calcium uniporter
-	&&	sp|	Q39023|MPK3_ARATH Mitogen-activated protein kinase 3 OS=Arabidopsis thaliana OX=3702 GN=MPK3 PE=1 SV=2 && PF00069:Protein kinase domain
-	&&	sp|	F4JFN3|HS906_ARATH Heat shock protein 90-6, mitochondrial OS=Arabidopsis thaliana OX=3702 GN=HSP90-6 PE=1 SV=1 && PF02518:Histidine kinase-, DNA gyrase B-, and HSP90-like ATPase|PF00183:Hsp90 protein
-	&&	sp|	P92994|TCMO_ARATH Trans-cinnamate 4-monooxygenase OS=Arabidopsis thaliana OX=3702 GN=CYP73A5 PE=1 SV=1 && PF00067:Cytochrome P450
-	&&	sp|	Q8GWK5|GASA9_ARATH Gibberellin-regulated protein 9 OS=Arabidopsis thaliana OX=3702 GN=GASA9 PE=3 SV=1 && PF02704:Gibberellin regulated protein
-	&&	sp|	Q9SAH7|WRK40_ARATH Probable WRKY transcription factor 40 OS=Arabidopsis thaliana OX=3702 GN=WRKY40 PE=1 SV=1 && PF03106:WRKY DNA -binding domain
-	&&	sp|	Q93YS4|AB22G_ARATH ABC transporter G family member 22 OS=Arabidopsis thaliana OX=3702 GN=ABCG22 PE=1 SV=1 && PF00005:ABC transporter|PF01061:ABC-2 type transporter
-	&&	sp|	P55737|HS902_ARATH Heat shock protein 90-2 OS=Arabidopsis thaliana OX=3702 GN=HSP90-2 PE=1 SV=1 && PF00183:Hsp90 protein|PF02518:Histidine kinase-, DNA gyrase B-, and HSP90-like ATPase
-	&&	sp|	Q9LE22|CML27_ARATH Probable calcium-binding protein CML27 OS=Arabidopsis thaliana OX=3702 GN=CML27 PE=1 SV=1 && PF13499:EF-hand domain pair
-	&&	sp|	O04023|SRC2_ARATH Protein SRC2 homolog OS=Arabidopsis thaliana OX=3702 GN=SRC2 PE=1 SV=1 && PF00168:C2 domain
-	&&	sp|	O22808|LYK5_ARATH Protein LYK5 OS=Arabidopsis thaliana OX=3702 GN=LYK5 PE=2 SV=1 && PF00069:Protein kinase domain
-	&&	sp|	Q9S745|PAD4_ARATH Lipase-like PAD4 OS=Arabidopsis thaliana OX=3702 GN=PAD4 PE=1 SV=1 && PF01764:Lipase (class 3)|PF18117:Enhanced disease susceptibility 1 protein EP domain
-	&&	sp|	P43287|PIP22_ARATH Aquaporin PIP2-2 OS=Arabidopsis thaliana OX=3702 GN=PIP2-2 PE=1 SV=2 && PF00230:Major intrinsic protein
-	&&	- &	& -
-	&&	- &	& PF06813:Nodulin-like
-	&&	sp|	Q9ZU49|LPP1_ARATH Lipid phosphate phosphatase 1 OS=Arabidopsis thaliana OX=3702 GN=LPP1 PE=2 SV=2 && PF01569:PAP2 superfamily
-	&&	sp|	Q9STX5|ENPL_ARATH Endoplasmin homolog OS=Arabidopsis thaliana OX=3702 GN=HSP90-7 PE=1 SV=1 && PF02518:Histidine kinase-, DNA gyrase B-, and HSP90-like ATPase|PF00183:Hsp90 protein
-	&&	sp|	Q8L9J7|SWET1_ARATH Bidirectional sugar transporter SWEET1 OS=Arabidopsis thaliana OX=3702 GN=SWEET1 PE=1 SV=1 && PF03083:Sugar efflux transporter for intercellular exchange
-	&&	sp|	O81831|CARP1_ARATH Calcium-binding protein KRP1 OS=Arabidopsis thaliana OX=3702 GN=KRP1 PE=2 SV=1 && PF13833:EF-hand domain pair
-	&&	- &	& -
-	&&	sp|	Q8LPL3|ASO_ARATH L-ascorbate oxidase OS=Arabidopsis thaliana OX=3702 GN=AAO PE=1 SV=1 && PF00394:Multicopper oxidase|PF07732:Multicopper oxidase|PF07731:Multicopper oxidase
-	&&	sp|	Q9LY00|WRK70_ARATH Probable WRKY transcription factor 70 OS=Arabidopsis thaliana OX=3702 GN=WRKY70 PE=1 SV=1 && PF03106:WRKY DNA -binding domain
-	&&	sp|	P29402|CALX1_ARATH Calnexin homolog 1 OS=Arabidopsis thaliana OX=3702 GN=CNX1 PE=1 SV=1 && PF00262:Calreticulin family
-	&&	sp|	O80683|CAB25_ARATH Calmodulin-binding protein 25 OS=Arabidopsis thaliana OX=3702 GN=CAMBP25 PE=1 SV=1 && PF05678:VQ motif
-	&&	sp|	O04609|WRK22_ARATH WRKY transcription factor 22 OS=Arabidopsis thaliana OX=3702 GN=WRKY22 PE=2 SV=1 && PF03106:WRKY DNA -binding domain
-	&&	sp|	C0SVV6|CB60A_ARATH Calmodulin-binding protein 60 A OS=Arabidopsis thaliana OX=3702 GN=CBP60A PE=2 SV=1 && PF07887:Calmodulin binding protein-like
-	&&	sp|	Q9XIE0|FH7_ARATH Formin-like protein 7 OS=Arabidopsis thaliana OX=3702 GN=FH7 PE=2 SV=1 && PF02181:Formin Homology 2 Domain
-	&&	sp|	O04151|CALR1_ARATH Calreticulin-1 OS=Arabidopsis thaliana OX=3702 GN=CRT1 PE=1 SV=1 && PF00262:Calreticulin family
-	&&	sp|	Q38857|XTH22_ARATH Xyloglucan endotransglucosylase/hydrolase protein 22 OS=Arabidopsis thaliana OX=3702 GN=XTH22 PE=1 SV=1 && PF06955:Xyloglucan endo-transglycosylase (XET) C-terminus|PF00722:Glycosyl hydrolases family 16
-	&&	sp|	Q9SR87|LRK61_ARATH Probable L-type lectin-domain containing receptor kinase VI.1 OS=Arabidopsis thaliana OX=3702 GN=LECRK61 PE=2 SV=1 && PF00139:Legume lectin domain|PF00069:Protein kinase domain
-	&&	sp|	Q8S8P5|WRK33_ARATH Probable WRKY transcription factor 33 OS=Arabidopsis thaliana OX=3702 GN=WRKY33 PE=1 SV=2 && PF03106:WRKY DNA -binding domain
-	&&	sp|	P46271|GLP1_BRANA Germin-like protein 1 OS=Brassica napus OX=3708 GN=GER1 PE=2 SV=1 && PF00190:Cupin
-	&&	sp|	Q9LZK5|DNJ19_ARATH DnaJ protein ERDJ3B OS=Arabidopsis thaliana OX=3702 GN=ERDJ3B PE=1 SV=1 && PF01556:DnaJ C terminal domain|PF00226:DnaJ domain
-	&&	- &	& -
-	&&	sp|	Q9ZQG9|E1314_ARATH Glucan endo-1,3-beta-glucosidase 14 OS=Arabidopsis thaliana OX=3702 GN=At2g27500 PE=2 SV=2 && PF00332:Glycosyl hydrolases family 17
-	&&	sp|	P55737|HS902_ARATH Heat shock protein 90-2 OS=Arabidopsis thaliana OX=3702 GN=HSP90-2 PE=1 SV=1 && PF02518:Histidine kinase-, DNA gyrase B-, and HSP90-like ATPase|PF00183:Hsp90 protein
-	&&	sp|	Q8LEV7|6PGL5_ARATH Probable 6-phosphogluconolactonase 5 OS=Arabidopsis thaliana OX=3702 GN=PGL5 PE=2 SV=2 && PF01182:Glucosamine-6-phosphate isomerases/6-phosphogluconolactonase
-	&&	sp|	Q9LI84|CML16_ARATH Probable calcium-binding protein CML16 OS=Arabidopsis thaliana OX=3702 GN=CML16 PE=2 SV=2 && PF13499:EF-hand domain pair
-	&&	sp|	F4KGY6|RVE1_ARATH Protein REVEILLE 1 OS=Arabidopsis thaliana OX=3702 GN=RVE1 PE=1 SV=1 && PF00249:Myb-like DNA-binding domain
-	&&	- &	& -
-	&&	sp|	Q9SS43|MUC21_ARATH Xylan glycosyltransferase MUCI21 OS=Arabidopsis thaliana OX=3702 GN=MUCI21 PE=1 SV=1 && PF04577:Protein of unknown function (DUF563)
-	&&	sp|	Q9FID8|Y5900_ARATH Putative receptor-like protein kinase At5g39000 OS=Arabidopsis thaliana OX=3702 GN=At5g39000 PE=3 SV=1 && PF07714:Protein tyrosine and serine/threonine kinase|PF12819:Malectin-like domain
-	&&	sp|	C0LGH3|Y5614_ARATH Probable LRR receptor-like serine/threonine-protein kinase At1g56140 OS=Arabidopsis thaliana OX=3702 GN=At1g56140 PE=2 SV=2 && PF07714:Protein tyrosine and serine/threonine kinase
-	&&	sp|	O04203|HSPR2_ARATH Nematode resistance protein-like HSPRO2 OS=Arabidopsis thaliana OX=3702 GN=HSPRO2 PE=1 SV=1 && PF07014:Hs1pro-1 protein C-terminus|PF07231:Hs1pro-1 N-terminus
-	&&	sp|	Q9STX5|ENPL_ARATH Endoplasmin homolog OS=Arabidopsis thaliana OX=3702 GN=HSP90-7 PE=1 SV=1 && PF00183:Hsp90 protein|PF02518:Histidine kinase-, DNA gyrase B-, and HSP90-like ATPase
-	&&	sp|	Q9ZPJ8|AMT12_ARATH Ammonium transporter 1 member 2 OS=Arabidopsis thaliana OX=3702 GN=AMT1-2 PE=1 SV=1 && PF00909:Ammonium Transporter Family
-	&&	sp|	Q8VX13|PDI13_ARATH Protein disulfide isomerase-like 1-3 OS=Arabidopsis thaliana OX=3702 GN=PDIL1-3 PE=2 SV=1 && PF13848:Thioredoxin-like domain|PF00085:Thioredoxin
-	&&	sp|	P55737|HS902_ARATH Heat shock protein 90-2 OS=Arabidopsis thaliana OX=3702 GN=HSP90-2 PE=1 SV=1 && PF02518:Histidine kinase-, DNA gyrase B-, and HSP90-like ATPase|PF00183:Hsp90 protein
-	&&	sp|	O04203|HSPR2_ARATH Nematode resistance protein-like HSPRO2 OS=Arabidopsis thaliana OX=3702 GN=HSPRO2 PE=1 SV=1 && PF07231:Hs1pro-1 N-terminus|PF07014:Hs1pro-1 protein C-terminus
-	&&	sp|	Q6NMS0|GSTUC_ARATH Glutathione S-transferase U12 OS=Arabidopsis thaliana OX=3702 GN=GSTU12 PE=2 SV=2 && PF13417:Glutathione S-transferase, N-terminal domain
-	&&	sp|	O04203|HSPR2_ARATH Nematode resistance protein-like HSPRO2 OS=Arabidopsis thaliana OX=3702 GN=HSPRO2 PE=1 SV=1 && PF07014:Hs1pro-1 protein C-terminus|PF07231:Hs1pro-1 N-terminus
-	&&	- &	& PF05050:Methyltransferase FkbM domain
-	&&	sp|	Q9LFC6|FRB1_ARATH Protein FRIABLE 1 OS=Arabidopsis thaliana OX=3702 GN=FRB1 PE=2 SV=1 && PF10250:GDP-fucose protein O-fucosyltransferase
-	&&	- &	& -
-	&&	sp|	Q9LV48|PERK1_ARATH Proline-rich receptor-like protein kinase PERK1 OS=Arabidopsis thaliana OX=3702 GN=PERK1 PE=1 SV=1 && PF07714:Protein tyrosine and serine/threonine kinase
-	&&	sp|	F4JMJ1|HSP7R_ARATH Heat shock 70 kDa protein 17 OS=Arabidopsis thaliana OX=3702 GN=HSP70-17 PE=2 SV=1 && PF00012:Hsp70 protein
-	&&	sp|	O80683|CAB25_ARATH Calmodulin-binding protein 25 OS=Arabidopsis thaliana OX=3702 GN=CAMBP25 PE=1 SV=1 && PF05678:VQ motif
-	&&	sp|	Q6NLQ6|CDPKW_ARATH Calcium-dependent protein kinase 32 OS=Arabidopsis thaliana OX=3702 GN=CPK32 PE=1 SV=1 && PF13499:EF-hand domain pair|PF00069:Protein kinase domain
-	&&	- &	& -
-	&&	sp|	Q9FTA2|TCP21_ARATH Transcription factor TCP21 OS=Arabidopsis thaliana OX=3702 GN=TCP21 PE=1 SV=1 && PF03634:TCP family transcription factor
-	&&	sp|	O81760|P2C63_ARATH Probable protein phosphatase 2C 63 OS=Arabidopsis thaliana OX=3702 GN=At4g33920 PE=2 SV=1 && PF00481:Protein phosphatase 2C
-	&&	sp|	Q25AG5|ERG3_ORYSI Elicitor-responsive protein 3 OS=Oryza sativa subsp. indica OX=39946 GN=ERG3 PE=2 SV=1 && PF00168:C2 domain|PF01585:G-patch domain|PF17780:OCRE domain
-	&&	sp|	Q9C7F7|LTPG1_ARATH Non-specific lipid transfer protein GPI-anchored 1 OS=Arabidopsis thaliana OX=3702 GN=LTPG1 PE=2 SV=1 && PF14368:Probable lipid transfer
-	&&	sp|	Q9CAR7|HIR2_ARATH Hypersensitive-induced response protein 2 OS=Arabidopsis thaliana OX=3702 GN=HIR2 PE=1 SV=1 && PF01145:SPFH domain / Band 7 family
-	&&	sp|	A0A0B5GR44|OFT20_BRANA O-fucosyltransferase 20 OS=Brassica napus OX=3708 GN=OFUT20 PE=2 SV=2 && PF10250:GDP-fucose protein O-fucosyltransferase
-	&&	sp|	O81831|CARP1_ARATH Calcium-binding protein KRP1 OS=Arabidopsis thaliana OX=3702 GN=KRP1 PE=2 SV=1 && PF13833:EF-hand domain pair
-	&&	- &	& -
-	&&	sp|	Q08298|RD22_ARATH BURP domain protein RD22 OS=Arabidopsis thaliana OX=3702 GN=RD22 PE=2 SV=1 && PF03181:BURP domain
-	&&	sp|	O81760|P2C63_ARATH Probable protein phosphatase 2C 63 OS=Arabidopsis thaliana OX=3702 GN=At4g33920 PE=2 SV=1 && PF00481:Protein phosphatase 2C
-	&&	sp|	P93824|ACCH6_ARATH 1-aminocyclopropane-1-carboxylate oxidase homolog 6 OS=Arabidopsis thaliana OX=3702 GN=At1g04350 PE=2 SV=1 && PF14226:non-haem dioxygenase in morphine synthesis N-terminal|PF03171:2OG-Fe(II) oxygenase superfamily
-	&&	sp|	Q9FZ59|PEPR2_ARATH Leucine-rich repeat receptor-like protein kinase PEPR2 OS=Arabidopsis thaliana OX=3702 GN=PEPR2 PE=1 SV=1 && PF00069:Protein kinase domain|PF08263:Leucine rich repeat N-terminal domain|PF13855:Leucine rich repeat
-	&&	sp|	Q9SH93|IPCS2_ARATH Phosphatidylinositol:ceramide inositolphosphotransferase 2 OS=Arabidopsis thaliana OX=3702 GN=IPCS2 PE=1 SV=1 && PF14360:PAP2 superfamily C-terminal
-	&&	sp|	Q08298|RD22_ARATH BURP domain protein RD22 OS=Arabidopsis thaliana OX=3702 GN=RD22 PE=2 SV=1 && PF03181:BURP domain
-	&&	sp|	P22954|HS702_ARATH Heat shock 70 kDa protein 2 OS=Arabidopsis thaliana OX=3702 GN=HSP70-2 PE=1 SV=2 && PF00012:Hsp70 protein
-	&&	sp|	Q8GYX8|DNJ10_ARATH Chaperone protein dnaJ 10 OS=Arabidopsis thaliana OX=3702 GN=ATJ10 PE=2 SV=2 && PF14308:X-domain of DnaJ-containing|PF00226:DnaJ domain
-	&&	sp|	Q4F883|SG101_ARATH Senescence-associated carboxylesterase 101 OS=Arabidopsis thaliana OX=3702 GN=SAG101 PE=1 SV=1 && PF01764:Lipase (class 3)|PF18117:Enhanced disease susceptibility 1 protein EP domain
-	&&	sp|	Q38868|CDPK9_ARATH Calcium-dependent protein kinase 9 OS=Arabidopsis thaliana OX=3702 GN=CPK9 PE=1 SV=1 && PF13499:EF-hand domain pair|PF00069:Protein kinase domain
-	&&	sp|	Q9SF24|LOR10_ARATH Protein LURP-one-related 10 OS=Arabidopsis thaliana OX=3702 GN=At3g11740 PE=2 SV=2 && PF04525:LURP-one-related
-	&&	sp|	Q42512|CR15A_ARATH Protein COLD-REGULATED 15A, chloroplastic OS=Arabidopsis thaliana OX=3702 GN=COR15A PE=1 SV=1 && -
-	&&	sp|	Q9SE50|BGL18_ARATH Beta-D-glucopyranosyl abscisate beta-glucosidase OS=Arabidopsis thaliana OX=3702 GN=BGLU18 PE=1 SV=2 && PF00232:Glycosyl hydrolase family 1
-	&&	sp|	Q9LIA8|UGDH2_ARATH UDP-glucose 6-dehydrogenase 2 OS=Arabidopsis thaliana OX=3702 GN=UGD2 PE=1 SV=1 && PF00984:UDP-glucose/GDP-mannose dehydrogenase family, central domain|PF03720:UDP-glucose/GDP-mannose dehydrogenase family, UDP binding domain|PF03721:UDP-glucose/GDP-mannose dehydrogenase family, NAD binding domain
-	&&	sp|	F4KGY6|RVE1_ARATH Protein REVEILLE 1 OS=Arabidopsis thaliana OX=3702 GN=RVE1 PE=1 SV=1 && PF00249:Myb-like DNA-binding domain
-	&&	sp|	O64745|BBE16_ARATH Berberine bridge enzyme-like 16 OS=Arabidopsis thaliana OX=3702 GN=At2g34810 PE=2 SV=1 && PF08031:Berberine and berberine like|PF01565:FAD binding domain
-	&&	sp|	Q8S8Q6|TET8_ARATH Tetraspanin-8 OS=Arabidopsis thaliana OX=3702 GN=TET8 PE=2 SV=1 && PF00335:Tetraspanin family
-	&&	sp|	Q9SXB6|MLO2_ARATH MLO-like protein 2 OS=Arabidopsis thaliana OX=3702 GN=MLO2 PE=1 SV=1 && PF03094:Mlo family
-	&&	sp|	Q9FX28|KTI3_ARATH Kunitz trypsin inhibitor 3 OS=Arabidopsis thaliana OX=3702 GN=KTI3 PE=2 SV=1 && PF00197:Trypsin and protease inhibitor
-	&&	sp|	Q9LVE0|PTR33_ARATH Protein NRT1/ PTR FAMILY 6.4 OS=Arabidopsis thaliana OX=3702 GN=NPF6.4 PE=1 SV=1 && PF00854:POT family
-	&&	sp|	Q9LYW9|DNJ36_ARATH DnaJ protein P58IPK homolog OS=Arabidopsis thaliana OX=3702 GN=P58IPK PE=1 SV=1 && PF00226:DnaJ domain
-	&&	sp|	Q9FNH6|NHL3_ARATH NDR1/HIN1-like protein 3 OS=Arabidopsis thaliana OX=3702 GN=NHL3 PE=1 SV=1 && PF03168:Late embryogenesis abundant protein
-	&&	sp|	Q9SSW2|AZF2_ARATH Zinc finger protein AZF2 OS=Arabidopsis thaliana OX=3702 GN=AZF2 PE=2 SV=1 && PF13912:C2H2-type zinc finger
-	&&	sp|	Q42600|C84A1_ARATH Cytochrome P450 84A1 OS=Arabidopsis thaliana OX=3702 GN=CYP84A1 PE=1 SV=1 && PF00067:Cytochrome P450
-	&&	sp|	Q9LK32|Y3721_ARATH Uncharacterized protein At3g27210 OS=Arabidopsis thaliana OX=3702 GN=Y-2 PE=1 SV=1 && -
-	&&	sp|	P45724|PAL2_ARATH Phenylalanine ammonia-lyase 2 OS=Arabidopsis thaliana OX=3702 GN=PAL2 PE=1 SV=2 && PF00221:Aromatic amino acid lyase
-	&&	sp|	O82567|AAPT1_ARATH Choline/ethanolaminephosphotransferase 1 OS=Arabidopsis thaliana OX=3702 GN=AAPT1 PE=1 SV=1 && PF01066:CDP-alcohol phosphatidyltransferase
-	&&	sp|	P27608|AROF_TOBAC Phospho-2-dehydro-3-deoxyheptonate aldolase 1, chloroplastic OS=Nicotiana tabacum OX=4097 GN=DHAPS-1 PE=2 SV=1 && PF01474:Class-II DAHP synthetase family
-	&&	sp|	O49196|APK2_ARATH Adenylyl-sulfate kinase 2, chloroplastic OS=Arabidopsis thaliana OX=3702 GN=APK2 PE=1 SV=1 && PF01583:Adenylylsulphate kinase
-	&&	sp|	Q9SXB6|MLO2_ARATH MLO-like protein 2 OS=Arabidopsis thaliana OX=3702 GN=MLO2 PE=1 SV=1 && PF03094:Mlo family
-	&&	sp|	Q9SUR6|CORI3_ARATH Cystine lyase CORI3 OS=Arabidopsis thaliana OX=3702 GN=CORI3 PE=1 SV=1 && PF00155:Aminotransferase class I and II
-	&&	sp|	P52409|E13B_WHEAT Glucan endo-1,3-beta-glucosidase OS=Triticum aestivum OX=4565 GN=GLC1 PE=2 SV=1 && PF00332:Glycosyl hydrolases family 17|PF07983:X8 domain
-	&&	sp|	Q9ZU49|LPP1_ARATH Lipid phosphate phosphatase 1 OS=Arabidopsis thaliana OX=3702 GN=LPP1 PE=2 SV=2 && PF01569:PAP2 superfamily
-	&&	sp|	Q9SZE8|LBD39_ARATH LOB domain-containing protein 39 OS=Arabidopsis thaliana OX=3702 GN=LBD39 PE=2 SV=1 && PF03195:Lateral organ boundaries (LOB) domain
-	&&	sp|	P29402|CALX1_ARATH Calnexin homolog 1 OS=Arabidopsis thaliana OX=3702 GN=CNX1 PE=1 SV=1 && PF00262:Calreticulin family
-	&&	sp|	Q37145|ACA1_ARATH Calcium-transporting ATPase 1 OS=Arabidopsis thaliana OX=3702 GN=ACA1 PE=1 SV=3 && PF00122:E1-E2 ATPase|PF12515:Ca2+-ATPase N terminal autoinhibitory domain|PF13246:Cation transport ATPase (P-type)|PF00690:Cation transporter/ATPase, N-terminus
-	&&	sp|	Q9SJY5|PUMP5_ARATH Mitochondrial uncoupling protein 5 OS=Arabidopsis thaliana OX=3702 GN=PUMP5 PE=2 SV=1 && PF00153:Mitochondrial carrier protein
-	&&	- &	& -
-	&&	sp|	Q38858|CALR2_ARATH Calreticulin-2 OS=Arabidopsis thaliana OX=3702 GN=CRT2 PE=1 SV=3 && PF00262:Calreticulin family
-	&&	sp|	Q9SRG3|PDI12_ARATH Protein disulfide isomerase-like 1-2 OS=Arabidopsis thaliana OX=3702 GN=PDIL1-2 PE=2 SV=1 && PF00085:Thioredoxin|PF13848:Thioredoxin-like domain
-	&&	sp|	Q56WH4|HDT2_ARATH Histone deacetylase HDT2 OS=Arabidopsis thaliana OX=3702 GN=HDT2 PE=1 SV=2 && PF17800:Nucleoplasmin-like domain
-	&&	sp|	Q8S8Q6|TET8_ARATH Tetraspanin-8 OS=Arabidopsis thaliana OX=3702 GN=TET8 PE=2 SV=1 && PF00335:Tetraspanin family
-	&&	sp|	Q9CAS6|GSTUB_ARATH Glutathione S-transferase U11 OS=Arabidopsis thaliana OX=3702 GN=GSTU11 PE=2 SV=1 && PF13417:Glutathione S-transferase, N-terminal domain
-	&&	sp|	O22808|LYK5_ARATH Protein LYK5 OS=Arabidopsis thaliana OX=3702 GN=LYK5 PE=2 SV=1 && PF00069:Protein kinase domain
-	&&	sp|	Q9LXM2|CAF1I_ARATH Probable CCR4-associated factor 1 homolog 9 OS=Arabidopsis thaliana OX=3702 GN=CAF1-9 PE=2 SV=1 && PF04857:CAF1 family ribonuclease
-	&&	sp|	O49499|CAMT4_ARATH Caffeoyl-CoA O-methyltransferase 1 OS=Arabidopsis thaliana OX=3702 GN=CCOAOMT1 PE=1 SV=1 && PF01596:O-methyltransferase
-	&&	sp|	Q9LH79|SWET2_ARATH Bidirectional sugar transporter SWEET2 OS=Arabidopsis thaliana OX=3702 GN=SWEET2 PE=1 SV=1 && PF03083:Sugar efflux transporter for intercellular exchange
-	&&	- &	& -
-	&&	- &	& -
-	&&	sp|	Q9SAR0|1A16_ARATH 1-aminocyclopropane-1-carboxylate synthase 6 OS=Arabidopsis thaliana OX=3702 GN=ACS6 PE=1 SV=2 && PF00155:Aminotransferase class I and II
-	&&	sp|	O04023|SRC2_ARATH Protein SRC2 homolog OS=Arabidopsis thaliana OX=3702 GN=SRC2 PE=1 SV=1 && PF00168:C2 domain
-	&&	sp|	P26320|PSBO_SOLTU Oxygen-evolving enhancer protein 1, chloroplastic OS=Solanum tuberosum OX=4113 GN=PSBO PE=2 SV=1 && PF01716:Manganese-stabilising protein / photosystem II polypeptide
-	&&	sp|	Q9SJQ9|ALFC6_ARATH Fructose-bisphosphate aldolase 6, cytosolic OS=Arabidopsis thaliana OX=3702 GN=FBA6 PE=1 SV=1 && PF00274:Fructose-bisphosphate aldolase class-I
-	&&	sp|	Q9FMD9|GLN14_ARATH Glutamine synthetase cytosolic isozyme 1-4 OS=Arabidopsis thaliana OX=3702 GN=GLN1-4 PE=1 SV=1 && PF00120:Glutamine synthetase, catalytic domain|PF03951:Glutamine synthetase, beta-Grasp domain
-	&&	sp|	Q9FT51|AB27G_ARATH ABC transporter G family member 27 OS=Arabidopsis thaliana OX=3702 GN=ABCG27 PE=2 SV=1 && PF19055:ABC-2 type transporter|PF00005:ABC transporter|PF01061:ABC-2 type transporter
-	&&	sp|	Q8GYA4|CRK10_ARATH Cysteine-rich receptor-like protein kinase 10 OS=Arabidopsis thaliana OX=3702 GN=CRK10 PE=1 SV=3 && PF01657:Salt stress response/antifungal|PF07714:Protein tyrosine and serine/threonine kinase
-	&&	sp|	Q9Y7K5|YGI3_SCHPO Uncharacterized WD repeat-containing protein C2A9.03 OS=Schizosaccharomyces pombe (strain 972 / ATCC 24843) OX=284812 GN=SPBC2A9.03 PE=4 SV=2 && PF00400:WD domain, G-beta repeat
-	&&	sp|	Q38931|FKB62_ARATH Peptidyl-prolyl cis-trans isomerase FKBP62 OS=Arabidopsis thaliana OX=3702 GN=FKBP62 PE=1 SV=2 && PF00254:FKBP-type peptidyl-prolyl cis-trans isomerase|PF00515:Tetratricopeptide repeat
-	&&	sp|	Q9LMM6|BPS1_ARATH Protein BPS1, chloroplastic OS=Arabidopsis thaliana OX=3702 GN=BPS1 PE=2 SV=1 && -
-	&&	sp|	Q9LXM2|CAF1I_ARATH Probable CCR4-associated factor 1 homolog 9 OS=Arabidopsis thaliana OX=3702 GN=CAF1-9 PE=2 SV=1 && PF04857:CAF1 family ribonuclease
-	&&	sp|	Q9LZK5|DNJ19_ARATH DnaJ protein ERDJ3B OS=Arabidopsis thaliana OX=3702 GN=ERDJ3B PE=1 SV=1 && PF01556:DnaJ C terminal domain|PF00226:DnaJ domain
-	&&	- &	& PF12043:Domain of unknown function (DUF3527)
-	&&	sp|	Q9SJM6|SAP4_ARATH Zinc finger A20 and AN1 domain-containing stress-associated protein 4 OS=Arabidopsis thaliana OX=3702 GN=SAP4 PE=1 SV=1 && PF01754:A20-like zinc finger|PF01428:AN1-like Zinc finger
-	&&	sp|	O22841|CHI62_ARATH Endochitinase At2g43620 OS=Arabidopsis thaliana OX=3702 GN=At2g43620 PE=3 SV=1 && PF00187:Chitin recognition protein|PF00182:Chitinase class I
-	&&	sp|	Q8VYG0|LRL13_ARATH LEAF RUST 10 DISEASE-RESISTANCE LOCUS RECEPTOR-LIKE PROTEIN KINASE-like 1.3 OS=Arabidopsis thaliana OX=3702 GN=LRK10L-1.3 PE=2 SV=1 && PF13947:Wall-associated receptor kinase galacturonan-binding|PF07714:Protein tyrosine and serine/threonine kinase|PF14380:Wall-associated receptor kinase C-terminal
-	&&	sp|	Q9M0M5|SCL13_ARATH Scarecrow-like protein 13 OS=Arabidopsis thaliana OX=3702 GN=SCL13 PE=2 SV=2 && PF03514:GRAS domain family
-	&&	sp|	Q9SAH7|WRK40_ARATH Probable WRKY transcription factor 40 OS=Arabidopsis thaliana OX=3702 GN=WRKY40 PE=1 SV=1 && PF03106:WRKY DNA -binding domain
-	&&	sp|	Q9FPH0|XB34_ARATH Putative E3 ubiquitin-protein ligase XBAT34 OS=Arabidopsis thaliana OX=3702 GN=XBAT34 PE=2 SV=1 && PF13920:Zinc finger, C3HC4 type (RING finger)
-	&&	sp|	Q9FE06|EXOL2_ARATH Protein EXORDIUM-like 2 OS=Arabidopsis thaliana OX=3702 GN=EXL2 PE=2 SV=1 && PF04674:Phosphate-induced protein 1 conserved region
-	&&	sp|	Q9LD37|CNG20_ARATH Probable cyclic nucleotide-gated ion channel 20, chloroplastic OS=Arabidopsis thaliana OX=3702 GN=CNGC20 PE=2 SV=1 && PF00520:Ion transport protein
-	&&	sp|	Q9S762|HIS1A_ARATH ATP phosphoribosyltransferase 1, chloroplastic OS=Arabidopsis thaliana OX=3702 GN=HISN1A PE=1 SV=1 && PF08029:HisG, C-terminal domain|PF01634:ATP phosphoribosyltransferase
-	&&	sp|	Q9ZSD4|SY121_ARATH Syntaxin-121 OS=Arabidopsis thaliana OX=3702 GN=SYP121 PE=1 SV=1 && PF00804:Syntaxin|PF05739:SNARE domain
-	&&	sp|	Q9M9H6|CK1_ARATH Probable choline kinase 1 OS=Arabidopsis thaliana OX=3702 GN=CK1 PE=2 SV=1 && PF01633:Choline/ethanolamine kinase
-	&&	sp|	Q5M7D4|CNPY1_XENLA Protein canopy homolog 1 OS=Xenopus laevis OX=8355 GN=cnpy1 PE=2 SV=1 && PF11938:TLR4 regulator and MIR-interacting MSAP
-	&&	sp|	Q6AYK6|CYBP_RAT Calcyclin-binding protein OS=Rattus norvegicus OX=10116 GN=Cacybp PE=1 SV=1 && PF09032:Siah interacting protein, N terminal|PF04969:CS domain
-	&&	sp|	P05100|3MG1_ECOLI DNA-3-methyladenine glycosylase 1 OS=Escherichia coli (strain K12) OX=83333 GN=tag PE=1 SV=1 && PF03352:Methyladenine glycosylase
-	&&	sp|	Q8S8Q6|TET8_ARATH Tetraspanin-8 OS=Arabidopsis thaliana OX=3702 GN=TET8 PE=2 SV=1 && PF00335:Tetraspanin family
-	&&	sp|	Q9C5S9|CRK6_ARATH Cysteine-rich receptor-like protein kinase 6 OS=Arabidopsis thaliana OX=3702 GN=CRK6 PE=1 SV=1 && PF07714:Protein tyrosine and serine/threonine kinase
-	&&	- &	& -
-	&&	sp|	Q9LDH1|SIB1_ARATH Sigma factor binding protein 1, chloroplastic OS=Arabidopsis thaliana OX=3702 GN=SIB1 PE=1 SV=1 && PF05678:VQ motif
-	&&	sp|	Q9FFF6|JOX2_ARATH Jasmonate-induced oxygenase 2 OS=Arabidopsis thaliana OX=3702 GN=JOX2 PE=1 SV=1 && PF03171:2OG-Fe(II) oxygenase superfamily|PF14226:non-haem dioxygenase in morphine synthesis N-terminal
-	&&	- &	& PF07816:Protein of unknown function (DUF1645)
-	&&	sp|	Q9ZSD4|SY121_ARATH Syntaxin-121 OS=Arabidopsis thaliana OX=3702 GN=SYP121 PE=1 SV=1 && PF00804:Syntaxin|PF05739:SNARE domain
-	&&	sp|	Q9LK62|AB7C_ARATH ABC transporter C family member 7 OS=Arabidopsis thaliana OX=3702 GN=ABCC7 PE=1 SV=1 && PF00132:Bacterial transferase hexapeptide (six repeats)|PF06426:Serine acetyltransferase, N-terminal|PF00005:ABC transporter|PF00664:ABC transporter transmembrane region
-	&&	sp|	Q9C5L3|GLPT1_ARATH Putative glycerol-3-phosphate transporter 1 OS=Arabidopsis thaliana OX=3702 GN=At3g47420 PE=2 SV=1 && PF07690:Major Facilitator Superfamily
-	&&	sp|	Q9FZ21|G2OX6_ARATH Gibberellin 2-beta-dioxygenase 6 OS=Arabidopsis thaliana OX=3702 GN=GA2OX6 PE=2 SV=1 && PF03171:2OG-Fe(II) oxygenase superfamily|PF14226:non-haem dioxygenase in morphine synthesis N-terminal
-	&&	- &	& -
-	&&	sp|	P92980|APR3_ARATH 5'-adenylylsulfate reductase 3, chloroplastic OS=Arabidopsis thaliana OX=3702 GN=APR3 PE=2 SV=2 && PF00085:Thioredoxin|PF01507:Phosphoadenosine phosphosulfate reductase family
-	&&	sp|	Q9LE73|NUDT4_ARATH Nudix hydrolase 4 OS=Arabidopsis thaliana OX=3702 GN=NUDT4 PE=1 SV=1 && PF00293:NUDIX domain
-	&&	sp|	Q9SR96|DNJ63_ARATH DnaJ protein ERDJ3A OS=Arabidopsis thaliana OX=3702 GN=ERDJ3A PE=1 SV=1 && PF13848:Thioredoxin-like domain|PF00226:DnaJ domain
-	&&	sp|	Q9SYS3|CRK40_ARATH Cysteine-rich receptor-like protein kinase 40 OS=Arabidopsis thaliana OX=3702 GN=CRK40 PE=2 SV=1 && PF00069:Protein kinase domain|PF01657:Salt stress response/antifungal
-	&&	sp|	Q9LDR9|EXP10_ARATH Expansin-A10 OS=Arabidopsis thaliana OX=3702 GN=EXPA10 PE=2 SV=1 && PF03330:Lytic transglycolase|PF01357:Expansin C-terminal domain
-	&&	- &	& PF03107:C1 domain
-	&&	sp|	Q38858|CALR2_ARATH Calreticulin-2 OS=Arabidopsis thaliana OX=3702 GN=CRT2 PE=1 SV=3 && PF00262:Calreticulin family
-	&&	sp|	P22953|HS701_ARATH Heat shock 70 kDa protein 1 OS=Arabidopsis thaliana OX=3702 GN=HSP70-1 PE=1 SV=3 && PF00012:Hsp70 protein
-	&&	sp|	Q9SGI8|CML40_ARATH Probable calcium-binding protein CML40 OS=Arabidopsis thaliana OX=3702 GN=CML40 PE=2 SV=1 && PF13833:EF-hand domain pair
-	&&	sp|	Q9FK25|OMT1_ARATH Flavone 3'-O-methyltransferase 1 OS=Arabidopsis thaliana OX=3702 GN=OMT1 PE=1 SV=1 && PF00891:O-methyltransferase domain|PF08100:Dimerisation domain
-	&&	sp|	Q9LV58|MBF1C_ARATH Multiprotein-bridging factor 1c OS=Arabidopsis thaliana OX=3702 GN=MBF1C PE=1 SV=1 && PF08523:Multiprotein bridging factor 1|PF01381:Helix-turn-helix
-	&&	sp|	Q9FKH6|B561P_ARATH Cytochrome b561 and DOMON domain-containing protein At5g35735 OS=Arabidopsis thaliana OX=3702 GN=At5g35735 PE=2 SV=1 && PF03188:Eukaryotic cytochrome b561|PF04526:Protein of unknown function (DUF568)
-	&&	sp|	Q6NLQ6|CDPKW_ARATH Calcium-dependent protein kinase 32 OS=Arabidopsis thaliana OX=3702 GN=CPK32 PE=1 SV=1 && PF00069:Protein kinase domain|PF13499:EF-hand domain pair
-	&&	sp|	Q944H0|PEAM2_ARATH Phosphomethylethanolamine N-methyltransferase OS=Arabidopsis thaliana OX=3702 GN=NMT2 PE=1 SV=2 && -
-	&&	sp|	Q9SU72|EDS1C_ARATH Protein EDS1 OS=Arabidopsis thaliana OX=3702 GN=EDS1 PE=1 SV=1 && PF01764:Lipase (class 3)|PF18117:Enhanced disease susceptibility 1 protein EP domain
-	&&	- &	& -
-	&&	sp|	Q9LTM1|C71BM_ARATH Cytochrome P450 71B22 OS=Arabidopsis thaliana OX=3702 GN=CYP71B22 PE=2 SV=1 && PF00067:Cytochrome P450
-	&&	sp|	Q9FGW5|CDKG1_ARATH Cyclin-dependent kinase G1 OS=Arabidopsis thaliana OX=3702 GN=CDKG1 PE=1 SV=1 && PF00069:Protein kinase domain
-	&&	sp|	Q9LJB7|BBX32_ARATH B-box zinc finger protein 32 OS=Arabidopsis thaliana OX=3702 GN=BBX32 PE=1 SV=1 && -
-	&&	sp|	Q9SS43|MUC21_ARATH Xylan glycosyltransferase MUCI21 OS=Arabidopsis thaliana OX=3702 GN=MUCI21 PE=1 SV=1 && PF04577:Protein of unknown function (DUF563)
-	&&	sp|	P92980|APR3_ARATH 5'-adenylylsulfate reductase 3, chloroplastic OS=Arabidopsis thaliana OX=3702 GN=APR3 PE=2 SV=2 && PF00085:Thioredoxin|PF01507:Phosphoadenosine phosphosulfate reductase family
-	&&	sp|	P35510|PAL1_ARATH Phenylalanine ammonia-lyase 1 OS=Arabidopsis thaliana OX=3702 GN=PAL1 PE=1 SV=3 && PF00221:Aromatic amino acid lyase
-	&&	sp|	P55737|HS902_ARATH Heat shock protein 90-2 OS=Arabidopsis thaliana OX=3702 GN=HSP90-2 PE=1 SV=1 && PF02518:Histidine kinase-, DNA gyrase B-, and HSP90-like ATPase|PF00183:Hsp90 protein
-	&&	sp|	O82337|AGP16_ARATH Arabinogalactan protein 16 OS=Arabidopsis thaliana OX=3702 GN=AGP16 PE=1 SV=1 && PF06376:Arabinogalactan peptide
-	&&	sp|	Q9STH1|HSOP3_ARATH Hsp70-Hsp90 organizing protein 3 OS=Arabidopsis thaliana OX=3702 GN=HOP3 PE=2 SV=1 && PF00515:Tetratricopeptide repeat|PF17830:STI1 domain|PF13414:TPR repeat
-	&&	sp|	Q8GYX8|DNJ10_ARATH Chaperone protein dnaJ 10 OS=Arabidopsis thaliana OX=3702 GN=ATJ10 PE=2 SV=2 && PF00226:DnaJ domain|PF14308:X-domain of DnaJ-containing
-	&&	sp|	Q9FIJ0|RBOHD_ARATH Respiratory burst oxidase homolog protein D OS=Arabidopsis thaliana OX=3702 GN=RBOHD PE=1 SV=1 && PF08022:FAD-binding domain|PF08030:Ferric reductase NAD binding domain|PF01794:Ferric reductase like transmembrane component|PF08414:Respiratory burst NADPH oxidase
-	&&	sp|	Q9LSQ6|PBP1_ARATH Calcium-binding protein PBP1 OS=Arabidopsis thaliana OX=3702 GN=PBP1 PE=1 SV=1 && PF13833:EF-hand domain pair
-	&&	sp|	Q9S9T6|FB220_ARATH F-box protein At4g05010 OS=Arabidopsis thaliana OX=3702 GN=At4g05010 PE=2 SV=1 && -
-	&&	sp|	Q9XIE0|FH7_ARATH Formin-like protein 7 OS=Arabidopsis thaliana OX=3702 GN=FH7 PE=2 SV=1 && PF02181:Formin Homology 2 Domain
-	&&	- &	& PF06624:Ribosome associated membrane protein RAMP4
-	&&	sp|	Q38910|XTH23_ARATH Probable xyloglucan endotransglucosylase/hydrolase protein 23 OS=Arabidopsis thaliana OX=3702 GN=XTH23 PE=2 SV=1 && PF06955:Xyloglucan endo-transglycosylase (XET) C-terminus|PF00722:Glycosyl hydrolases family 16
-	&&	sp|	P53990|IST1_HUMAN IST1 homolog OS=Homo sapiens OX=9606 GN=IST1 PE=1 SV=1 && PF03398:Regulator of Vps4 activity in the MVB pathway
-	&&	sp|	P29197|CH60A_ARATH Chaperonin CPN60, mitochondrial OS=Arabidopsis thaliana OX=3702 GN=CPN60 PE=1 SV=2 && PF00118:TCP-1/cpn60 chaperonin family
-	&&	sp|	O80871|P2C25_ARATH Probable protein phosphatase 2C 25 OS=Arabidopsis thaliana OX=3702 GN=At2g30020 PE=1 SV=1 && PF00481:Protein phosphatase 2C
-	&&	- &	& -
-	&&	sp|	Q9SFE4|ERF12_ARATH Ethylene-responsive transcription factor ERF012 OS=Arabidopsis thaliana OX=3702 GN=ERF012 PE=2 SV=1 && PF00847:AP2 domain
-	&&	sp|	Q9FNH6|NHL3_ARATH NDR1/HIN1-like protein 3 OS=Arabidopsis thaliana OX=3702 GN=NHL3 PE=1 SV=1 && PF03168:Late embryogenesis abundant protein
-	&&	sp|	P92983|PROD1_ARATH Proline dehydrogenase 1, mitochondrial OS=Arabidopsis thaliana OX=3702 GN=POX1 PE=1 SV=2 && PF01619:Proline dehydrogenase
-	&&	sp|	Q40784|AAPC_CENCI Putative glucose-6-phosphate 1-epimerase OS=Cenchrus ciliaris OX=35872 PE=2 SV=1 && PF01263:Aldose 1-epimerase
-	&&	sp|	P43287|PIP22_ARATH Aquaporin PIP2-2 OS=Arabidopsis thaliana OX=3702 GN=PIP2-2 PE=1 SV=2 && PF00230:Major intrinsic protein
-	&&	sp|	Q9FFF6|JOX2_ARATH Jasmonate-induced oxygenase 2 OS=Arabidopsis thaliana OX=3702 GN=JOX2 PE=1 SV=1 && PF14226:non-haem dioxygenase in morphine synthesis N-terminal|PF03171:2OG-Fe(II) oxygenase superfamily
-	&&	sp|	Q9S972|SD16_ARATH Receptor-like serine/threonine-protein kinase SD1-6 OS=Arabidopsis thaliana OX=3702 GN=SD16 PE=1 SV=2 && PF07714:Protein tyrosine and serine/threonine kinase|PF00954:S-locus glycoprotein domain|PF01453:D-mannose binding lectin|PF12398:Receptor serine/threonine kinase|PF11883:Domain of unknown function (DUF3403)|PF08276:PAN-like domain
-	&&	sp|	Q9SV30|GATA8_ARATH GATA transcription factor 8 OS=Arabidopsis thaliana OX=3702 GN=GATA8 PE=1 SV=1 && PF00320:GATA zinc finger
-	&&	sp|	Q9FZ21|G2OX6_ARATH Gibberellin 2-beta-dioxygenase 6 OS=Arabidopsis thaliana OX=3702 GN=GA2OX6 PE=2 SV=1 && PF03171:2OG-Fe(II) oxygenase superfamily|PF14226:non-haem dioxygenase in morphine synthesis N-terminal
-	&&	sp|	Q9ZVJ6|ANXD4_ARATH Annexin D4 OS=Arabidopsis thaliana OX=3702 GN=ANN4 PE=1 SV=1 && PF00191:Annexin
-	&&	sp|	Q8W4J8|TIF7_ARATH Protein TIFY 7 OS=Arabidopsis thaliana OX=3702 GN=TIFY7 PE=1 SV=2 && PF09425:Jas motif|PF06200:tify domain
-	&&	sp|	P39207|NDK1_ARATH Nucleoside diphosphate kinase 1 OS=Arabidopsis thaliana OX=3702 GN=NDK1 PE=1 SV=1 && PF00334:Nucleoside diphosphate kinase
-	&&	sp|	Q940Q1|PLY1_ARATH Probable pectate lyase 1 OS=Arabidopsis thaliana OX=3702 GN=At1g04680 PE=2 SV=2 && PF00544:Pectate lyase
-	&&	sp|	Q93ZS9|C3H47_ARATH Zinc finger CCCH domain-containing protein 47 OS=Arabidopsis thaliana OX=3702 GN=At3g55980 PE=2 SV=1 && -
-	&&	sp|	Q9LPU8|IGMT4_ARATH Indole glucosinolate O-methyltransferase 4 OS=Arabidopsis thaliana OX=3702 GN=IGMT4 PE=1 SV=1 && PF00891:O-methyltransferase domain|PF08100:Dimerisation domain
-	&&	sp|	Q8S9J6|ASPA_ARATH Aspartyl protease family protein At5g10770 OS=Arabidopsis thaliana OX=3702 GN=At5g10770 PE=2 SV=1 && PF14541:Xylanase inhibitor C-terminal|PF14543:Xylanase inhibitor N-terminal
-	&&	sp|	P42043|HEMH1_ARATH Ferrochelatase-1, chloroplastic/mitochondrial OS=Arabidopsis thaliana OX=3702 GN=FC1 PE=2 SV=1 && PF00762:Ferrochelatase
-	&&	sp|	Q9SA25|WAKLG_ARATH Wall-associated receptor kinase-like 8 OS=Arabidopsis thaliana OX=3702 GN=WAKL8 PE=2 SV=1 && PF08488:Wall-associated kinase|PF07714:Protein tyrosine and serine/threonine kinase
[truncated: 8,595 more rows]
