# Supplementary material for: Transcriptome Dynamics of Brassica juncea Leaves in Response to Omnivorous Beet Armyworm (Spodoptera exigua, Hübner)
Source: Int J Mol Sci. 2023 Nov 24;24(23):16690. doi: 10.3390/ijms242316690 (PMC10706706; doi:10.3390/ijms242316690)
Supplement: Supplementary file 1 [file ijms-24-16690-s001.zip › Table S4.xlsx]

## Sheet: up
Table S4. Venn showing the number of specific and shared up-regulated DEGs between the four time points.
745 elements included exclusively in "1h/CK":	96 elements included exclusively in "24h/CK":	1542 elements included exclusively in "48h/CK":	1017 elements included exclusively in "72h/CK":	84 common elements in "1h/CK", "24h/CK", "48h/CK" and "72h/CK":	58 common elements in "1h/CK" and "24h/CK":	71 common elements in "24h/CK" and "48h/CK":	639 common elements in "48h/CK" and "72h/CK":	11 common elements in "1h/CK", "24h/CK" and "48h/CK":	423 common elements in "24h/CK", "48h/CK" and "72h/CK":	35 common elements in "1h/CK" and "48h/CK":	115 common elements in "24h/CK" and "72h/CK":	24 common elements in "1h/CK", "48h/CK" and "72h/CK":	33 common elements in "1h/CK", "24h/CK" and "72h/CK":	48 common elements in "1h/CK" and "72h/CK":
BjuVA01G42210	BjuVB01G46320	BjuVB04G01510	BjuVA07G32430	BjuVB08G14460	BjuVA01G13820	BjuVA04G12650	BjuVB04G09770	BjuVB01G05810	BjuVB05G55370	BjuVB03G03020	BjuVA06G15420	BjuVB05G29460	BjuVB02G40360	BjuVA03G25670
BjuVB07G05310	BjuVB08G52550	BjuVA06G20210	BjuVB04G19790	BjuVB06G44180	BjuVB05G46910	BjuVB08G58040	BjuVB06G22080	BjuVA04G29320	BjuVB05G30030	BjuVA02G02270	BjuVB02G72950	BjuVB04G23780	BjuVA06G34200	BjuVB04G27060
BjuVB07G32200	BjuVA07G28220	BjuVA10G05330	BjuVA02G48550	BjuVA03G20080	BjuVB06G47620	BjuVB05G55580	BjuVA06G41280	BjuV_Contig00581G00220	BjuVB04G46690	BjuVA03G06140	BjuVB03G38890	BjuV_Contig00683G00490	BjuVA02G10560	BjuVA04G08700
BjuVA03G36940	BjuVA07G27800	BjuVB08G11540	BjuVA01G14280	BjuVB06G26580	BjuVA09G24450	BjuVA02G38210	BjuVB04G16000	BjuVA02G36560	BjuVA02G12470	BjuVB02G74880	BjuVA03G61780	BjuVB08G12840	BjuVA09G10500	BjuVA10G19220
BjuVA02G14170	BjuVB06G41430	BjuVA09G58660	BjuVB05G12710	BjuVB06G10110	BjuV_Contig01022G00150	BjuVB05G14740	BjuVA03G45080	BjuVA05G05010	BjuVB05G50510	BjuVA04G07390	BjuVA08G17330	BjuVB04G08530	BjuVA09G09350	BjuVB01G36510
BjuVA02G14230	BjuVB03G35310	BjuVB03G10740	BjuVB06G11520	BjuVB03G46020	BjuVA09G25770	BjuV_Contig00990G00160	BjuVA10G31010	BjuVB08G00120	BjuVB05G55390	BjuVA02G08330	BjuVA05G26510	BjuVA02G03240	BjuVB06G31820	BjuVB03G42180
BjuVB06G18920	BjuVA09G50590	BjuVA08G29720	BjuVA04G32810	BjuVA03G65090	BjuVB05G32280	BjuVB05G21040	BjuVA01G07800	BjuVA06G14130	BjuVA08G29770	BjuVB06G50810	BjuVA08G10630	BjuVA09G02350	BjuVA05G32870	BjuVA09G09320
BjuVA10G33700	BjuVB05G57620	BjuVA06G01000	BjuVB04G01060	BjuVA01G15450	BjuVB05G11650	BjuVB03G51580	BjuVB05G07420	BjuVA05G09890	BjuVB02G08430	BjuVB04G28550	BjuVB07G16740	BjuVA04G23330	BjuVB07G03140	BjuVA02G38830
BjuVB01G44500	BjuVB06G55040	BjuVA07G09060	BjuVB02G10900	BjuVA01G29220	BjuVB05G11470	BjuVA10G29430	BjuVA10G01240	BjuVB03G49900	BjuVB05G42720	BjuVB01G40840	BjuVB08G51460	BjuVB07G20290	BjuVB08G01210	BjuVA02G16460
BjuVA03G20180	BjuVB01G10640	BjuVB05G37280	BjuV_Contig00453G00220	BjuVA03G02190	BjuVA09G26270	BjuVA07G32150	BjuVA02G15490	BjuVA01G23530	BjuVA03G48460	BjuVA06G44230	BjuVA05G41590	BjuVA06G41670	BjuVA10G24740	BjuVB03G23890
BjuVB02G30680	BjuVA04G23580	BjuVB04G44350	BjuVB04G18310	BjuVB08G01170	BjuVA06G36790	BjuVA01G19660	BjuVB08G04390	BjuVB08G46830	BjuVA06G01640	BjuVB01G05820	BjuVB02G62670	BjuVA02G09900	BjuVB03G19210	BjuVB02G57450
BjuVA03G17020	BjuVB02G55430	BjuVB04G23960	BjuVB06G02120	BjuVB08G20450	BjuVA03G34430	BjuVB02G56330	BjuVA06G08690		BjuVB04G03960	BjuVA02G11850	BjuVB04G03300	BjuVA09G47310	BjuVB03G05730	BjuVB02G33660
BjuVA05G15460	BjuVB08G08080	BjuVA01G20430	BjuVA01G14840	BjuVA02G21850	BjuVB08G39530	BjuVA04G29330	BjuVB03G29710		BjuVA07G38730	BjuVB08G04700	BjuVB06G03190	BjuVA03G17360	BjuVA09G41160	BjuVA10G05470
BjuVB05G32230	BjuVB06G42730	BjuVB03G13640	BjuVB06G12770	BjuVA03G42600	BjuVB03G31070	BjuVA04G27480	BjuVA02G02620		BjuVB05G22390	BjuVB05G01280	BjuVA05G18590	BjuVB04G47150	BjuVA02G05700	BjuVA03G37450
BjuVB02G56260	BjuVA04G10270	BjuVB02G74440	BjuVA06G32560	BjuVB03G46730	BjuVA08G26700	BjuVA02G23080	BjuVB05G15270		BjuVB04G04200	BjuVB06G29400	BjuVB07G37830	BjuVB08G01090	BjuVB07G08620	BjuVA05G07090
BjuVA09G07260	BjuVA06G17330	BjuVA09G11710	BjuVA10G30030	BjuVB08G19290	BjuVA05G43150	BjuVA09G45750	BjuVA09G39950		BjuVA02G44590	BjuVA02G10050	BjuVA10G05480	BjuVA02G11840	BjuVA05G20650	BjuVA08G32490
BjuVB05G46130	BjuVA03G10580	BjuVA07G16740	BjuVA04G33920	BjuVB02G09790	BjuVA05G03520	BjuVB04G46960	BjuVA03G45060		BjuVA09G38380	BjuVA01G03490	BjuVB03G04470	BjuVA09G05900	BjuVA10G21780	BjuVA03G25090
BjuVA07G11000	BjuVA03G22130	BjuVB03G59210	BjuVB04G30740	BjuVA07G39550	BjuV_Contig00876G00030	BjuVA07G13970	BjuVA08G37030		BjuVB03G20080	BjuVB03G46140	BjuVA09G07070	BjuVB07G08860	BjuVA08G23390	BjuVA02G46890
BjuVB02G46700	BjuVA09G36790	BjuVA09G06120	BjuVB06G35220	BjuVA06G17900	BjuVA03G16950	BjuVA03G02690	BjuVB08G17120		BjuVB03G08340	BjuVA02G42430	BjuVA04G23670	BjuVA06G35000	BjuVA08G12050	BjuVA07G35240
BjuVB04G11750	BjuVB02G30470	BjuVB03G34260	BjuVA03G32140	BjuVB04G31360	BjuVA04G31780	BjuVB03G43370	BjuVA09G62980		BjuVB06G41250	BjuVB05G28730	BjuVB01G33750	BjuVA05G19070	BjuVA08G29140	BjuVA09G45330
BjuVB08G15700	BjuVB02G22260	BjuVA02G21340	BjuVB08G24940	BjuVA06G01650	BjuVA08G00120	BjuVA07G26530	BjuVB06G17130		BjuVA09G19260	BjuVB05G37220	BjuVA08G10610	BjuVB01G05400	BjuVB01G31840	BjuVA03G56300
BjuVA07G07970	BjuV_Contig00645G00180	BjuVA05G11350	BjuVB08G01000	BjuVB04G47370	BjuVA05G03510	BjuVB08G40000	BjuVA03G34140		BjuVA08G31330	BjuVA05G20430	BjuVB02G13510	BjuVA09G56490	BjuVA03G29550	BjuVB02G40080
BjuVA05G39630	BjuVA09G00700	BjuVA03G12990	BjuVB06G55210	BjuVB04G07740	BjuVB03G36100	BjuVB01G15810	BjuVB06G48190		BjuVA02G44620	BjuVA06G14950	BjuVA01G04440	BjuVB02G52840	BjuVB07G17700	BjuVA02G16770
BjuVA10G33690	BjuVA08G19110	BjuVB02G56830	BjuVB05G14310	BjuVA07G38500	BjuVB06G20800	BjuVB02G60640	BjuVB03G08380		BjuVA09G57940	BjuVA08G24210	BjuVA08G33690	BjuVA05G25120	BjuVB03G59170	BjuVA10G01420
BjuVB07G15330	BjuVB07G17320	BjuVA03G29900	BjuVA03G16560	BjuVB03G11130	BjuVA01G17300	BjuVA06G20180	BjuVB04G17690		BjuVB04G12840	BjuVA07G28790	BjuVB08G21460		BjuVA03G17240	BjuVB06G29660
BjuVA09G07310	BjuVA01G35690	BjuVB05G39430	BjuVA01G31330	BjuVB06G56530	BjuVB08G45110	BjuVB02G41700	BjuVA04G18830		BjuVB04G38130	BjuVB08G05610	BjuVA03G40640		BjuVA04G23920	BjuVA10G28180
BjuVB07G19850	BjuVA07G40020	BjuVA07G41350	BjuVB08G21000	BjuVB06G50100	BjuVA01G43530	BjuVB07G13080	BjuVA07G21840		BjuVB05G56430	BjuVB07G10380	BjuVB02G40370		BjuVB01G37420	BjuVB03G06890
BjuVA09G40600	BjuVA09G02070	BjuVA02G43510	BjuVA06G03470	BjuVA07G07370	BjuVB06G37320	BjuVB08G47350	BjuVA05G03220		BjuVA02G22910	BjuVA05G06580	BjuVB08G46250		BjuVA05G05030	BjuVA07G38490
BjuVB04G17530	BjuVA02G46410	BjuVA01G01290	BjuVA06G32570	BjuVA07G26520	BjuVB08G08850	BjuVB08G08130	BjuVB02G74810		BjuVB06G11080	BjuVB02G45310	BjuVB06G57090		BjuVB03G43030	BjuVB06G17930
BjuVB04G11860	BjuVB02G49880	BjuVB07G33860	BjuVA09G56950	BjuVB07G32240	BjuVB02G63930	BjuVA04G21190	BjuVA03G65070		BjuVA02G18570	BjuVA10G32330	BjuVA05G03730		BjuVA06G37770	BjuVB06G01190
BjuVB04G02450	BjuV_Contig00654_ERROPOS300000G00280	BjuVB03G29870	BjuVB08G54770	BjuVA03G02710	BjuVA08G34500	BjuVA07G41630	BjuVB04G25200		BjuVA06G01630	BjuVB01G30190	BjuVA02G29850		BjuVB08G08840	BjuVA09G60550
BjuVA05G14680	BjuVB02G60270	BjuVA01G35470	BjuVA09G22230	BjuVB06G27210	BjuVA10G31470	BjuV_Contig00683G00550	BjuVA02G48090		BjuVA05G10290	BjuVA03G54830	BjuVB02G60480		BjuVA01G18870	BjuVB05G58660
BjuVB01G29010	BjuVA10G18700	BjuVA05G40960	BjuVA03G68060	BjuVB05G56940	BjuVA10G13460	BjuVB02G73680	BjuVA03G18540		BjuVA02G45000	BjuVA03G60190	BjuVB02G56050		BjuVB02G63760	BjuV_Contig01043G00150
BjuVB05G11850	BjuVB03G58240	BjuVA10G28270	BjuV_Contig00685G00060	BjuVA03G21200	BjuVA10G05250	BjuVA09G64240	BjuVB08G10080		BjuVB05G34010	BjuVA03G07170	BjuVA04G16680			BjuVB08G57460
BjuVB08G11860	BjuVA01G00370	BjuVA07G10730	BjuVB06G15140	BjuVA07G42350	BjuVB03G44350	BjuVA03G48280	BjuVA06G46910		BjuVA02G35620	BjuVA01G06080	BjuVA02G42850			BjuVA09G18830
BjuVA09G19190	BjuVB02G61180	BjuVA03G27750	BjuVA09G27000	BjuVB08G54020	BjuVB06G04770	BjuVB01G11990	BjuVA01G44490		BjuVB04G04260		BjuVA09G48870			BjuVA05G35870
BjuVA03G00970	BjuVB02G04120	BjuVB04G24030	BjuVA03G68680	BjuVB01G07830	BjuVB03G07490	BjuVA10G31310	BjuVB03G01300		BjuVB02G41850		BjuVA05G03460			BjuVA08G27150
BjuVB05G12890	BjuVA06G30010	BjuVA01G02070	BjuVA05G41800	BjuVB03G43250	BjuV_Contig00272G00170	BjuVB04G24850	BjuVB02G56890		BjuVB04G31440		BjuVA03G17210			BjuVA10G29940
BjuVB08G19360	BjuVB08G48940	BjuVA01G07790	BjuVB08G13010	BjuVA09G60360	BjuVB02G43300	BjuVB02G73860	BjuVB02G34950		BjuVA03G66950		BjuVA06G47350			BjuVA09G09910
BjuVB02G64600	BjuVB03G47860	BjuVA04G19250	BjuV_Contig00581G00070	BjuVA06G44310	BjuVA05G13440	BjuVA10G30950	BjuVA07G30060		BjuVA04G13420		BjuVB03G19360			BjuVA09G24950
BjuVA03G11770	BjuVB07G22300	BjuVA04G23470	BjuVB07G17380	BjuVA07G37280	BjuVB03G57460	BjuVA03G30660	BjuVB07G13120		BjuVB05G28920		BjuVB05G13420			BjuVA10G25550
BjuVA05G36590	BjuVB03G03900	BjuVA03G45090	BjuVB07G01440	BjuVA04G34350	BjuVA05G41610	BjuVB07G15320	BjuVB01G40530		BjuVB05G48800		BjuVA03G61790			BjuVB08G05430
BjuVB08G25760	BjuVA08G34350	BjuVB03G31060	BjuVB02G15050	BjuVB01G24580	BjuVB04G30410	BjuVA05G01330	BjuVA07G22190		BjuVA04G32840		BjuVB07G28210			BjuVB03G11940
BjuVA09G62210	BjuVB03G43520	BjuVA08G23600	BjuVA07G03810	BjuVA08G20030	BjuVA02G07130	BjuVA09G12570	BjuVB02G23220		BjuVA07G33280		BjuVB02G72960			BjuVA06G10630
BjuVB02G59650	BjuVA03G16930	BjuVB02G61810	BjuVB07G06810	BjuVB05G07270	BjuVB05G19800	BjuVA05G35890	BjuVB02G09500		BjuVB03G06800		BjuVB01G11760			BjuVA09G15330
BjuVA04G28090	BjuVA10G23420	BjuVB08G15150	BjuVA01G09640	BjuVB04G53670	BjuVA03G10640	BjuVB02G70910	BjuVB08G04130		BjuVA08G12820		BjuVB02G47090			BjuVA10G30360
BjuVB07G18830	BjuVA05G05120	BjuVB05G07410	BjuVA07G42480	BjuVB03G44980	BjuVB02G23660	BjuVA09G56130	BjuVA08G23620		BjuVA08G01350		BjuVA05G29690			BjuVA07G31240
BjuVB08G15430	BjuVA08G29360	BjuVB08G15450	BjuVB04G30890	BjuVB05G19640	BjuVB03G13470	BjuVA08G26040	BjuVB04G18090		BjuVB03G42540		BjuVA05G01160			BjuVB05G29840
BjuVA03G43420	BjuVA10G19020	BjuVB06G43510	BjuVB05G13810	BjuVB03G17480	BjuVA07G18550	BjuVA03G41680	BjuVA10G32290		BjuVA06G44290		BjuVA09G64460
BjuVB02G07010	BjuVB07G19170	BjuVA08G25310	BjuVB07G24540	BjuVA02G17410	BjuVA02G20640	BjuVA07G45090	BjuVB06G55840		BjuVA07G29330		BjuVB07G19010
BjuVB06G07050	BjuVA07G25920	BjuVA01G33520	BjuVA08G10620	BjuVA03G15940	BjuVB02G45270	BjuVB05G59910	BjuVA01G01950		BjuVB03G07760		BjuVA05G28120
BjuVB03G30870	BjuVB01G14090	BjuVB04G21330	BjuVA10G30020	BjuVA01G07360	BjuVB07G45880	BjuVA03G63090	BjuVB05G19570		BjuVB05G37930		BjuVB06G37040
BjuVA09G40420	BjuVA01G32140	BjuVB03G15770	BjuVA03G59860	BjuVB03G44990	BjuVB07G28820	BjuVA04G32260	BjuVA04G18540		BjuVA04G18480		BjuVB04G35600
BjuVB01G45350	BjuVB05G50880	BjuVB08G37830	BjuVA05G44290	BjuVB06G04150	BjuVB07G16170	BjuVA07G21030	BjuVA06G01780		BjuVA03G45980		BjuV_Contig00855G00010
BjuVA03G16780	BjuVB06G47030	BjuVB03G47360	BjuVB02G04500	BjuVB06G47690	BjuVB05G17750	BjuVA06G05850	BjuVA07G27220		BjuVA02G26040		BjuVA03G46470
BjuVA03G13500	BjuVB06G55050	BjuVB06G24510	BjuVA06G41030	BjuVB01G34920	BjuVB03G17050	BjuVA04G26570	BjuVB08G27160		BjuVB03G32800		BjuVA03G38580
BjuVA01G16080	BjuVA03G37650	BjuVB08G11530	BjuVA03G17690	BjuVA09G36820	BjuVB04G21490	BjuVA01G02030	BjuVB01G39900		BjuVA09G60250		BjuVB07G26390
BjuVB03G08830	BjuVB08G32020	BjuVB08G23080	BjuVB08G54380	BjuVA10G27520	BjuVB05G13470	BjuVB05G09650	BjuVB02G60960		BjuVA01G03790		BjuVB08G58930
BjuVA02G46900	BjuVB06G42710	BjuVA03G03450	BjuVB02G69240	BjuVB01G00700		BjuVA09G50170	BjuVB08G37770		BjuVA08G28720		BjuVA03G30000
BjuVB07G15550	BjuVA03G55200	BjuVB08G09050	BjuVB04G36880	BjuVA06G38280		BjuVB01G08660	BjuV_Contig00848G00200		BjuVB04G46670		BjuVA09G57890
BjuVA09G54480	BjuVB07G32360	BjuVB04G38440	BjuVA10G06210	BjuVB04G46530		BjuVB08G12890	BjuVA04G22540		BjuVA08G33840		BjuVA03G05800
BjuVA03G13230	BjuVB02G27640	BjuVB05G31190	BjuVA06G12000	BjuVB05G54190		BjuVA06G17600	BjuVB01G15680		BjuV_Contig00272G00150		BjuVB03G38830
BjuVB02G34030	BjuVA10G19640	BjuVA10G31180	BjuVA04G34690	BjuVB07G42240		BjuVB03G09910	BjuVB03G11750		BjuVA07G39360		BjuVA07G00230
BjuVB02G67440	BjuV_Contig01011G00070	BjuVB01G44870	BjuVA03G11390	BjuVB03G26490		BjuVB08G40490	BjuVB05G27000		BjuVA06G00050		BjuVB04G35810
BjuVB08G35550	BjuVB01G05030	BjuVA05G40210	BjuVA03G50140	BjuVA02G45630		BjuVA10G18480	BjuVA05G23460		BjuVA08G31360		BjuVA01G17800
BjuVB06G48570	BjuVB02G34290	BjuVA10G19130	BjuVB01G45970	BjuVA04G03570		BjuVA03G09210	BjuVA09G43470		BjuVB01G05330		BjuVB02G62220
BjuVA03G13550	BjuVA09G11940	BjuVA06G37370	BjuV_Contig00475G00040	BjuVB03G46230		BjuVB05G29180	BjuVB06G12660		BjuVB03G06770		BjuVB04G11200
BjuVA03G49450	BjuVB05G18470	BjuVA04G31590	BjuVB04G17030	BjuVB02G75210		BjuV_Contig00683G00570	BjuVA03G30790		BjuVA10G20000		BjuVA09G19050
BjuVB03G16760	BjuVB01G39460	BjuVA05G40020	BjuVB02G59290	BjuVA07G40060		BjuVB02G16700	BjuVB02G52260		BjuVA02G00380		BjuVA05G34520
BjuVA06G35220	BjuVB01G30320	BjuVA09G43320	BjuVA01G42900	BjuVB02G50200		BjuVB05G21550	BjuVA03G64310		BjuVB01G17760		BjuVB02G35500
BjuVA02G45160	BjuVA07G10720	BjuVB07G29860	BjuVB02G73610	BjuVA01G13310		BjuVA02G04510	BjuVB07G18690		BjuVA06G36550		BjuV_Contig00694G00340
BjuVB02G45340	BjuVA07G28350	BjuVA05G35580	BjuVA08G33350	BjuVB04G13120			BjuVA09G36550		BjuVB01G19670		BjuVA05G18600
BjuVB08G22830	BjuVA05G16100	BjuVA07G28580	BjuVB02G54000	BjuVB02G52820			BjuVB05G01590		BjuVA07G43920		BjuVB01G21430
BjuVA10G22360	BjuVA07G18800	BjuVA02G00220	BjuVB02G21760	BjuVA02G32670			BjuVA02G10510		BjuVA10G10000		BjuVA01G26940
BjuVB01G32700	BjuVA09G00650	BjuVB03G47450	BjuVA08G26930	BjuVA07G31220			BjuVA05G01200		BjuVB05G00690		BjuVB04G35800
BjuVB02G44950	BjuVA06G02370	BjuVA03G05870	BjuVA07G03030	BjuVB05G24030			BjuVB05G00080		BjuVB05G07110		BjuVB04G05850
BjuVA01G02570	BjuVB07G45300	BjuVB07G48880	BjuVA04G33430	BjuVB06G12310			BjuVB03G13660		BjuVB04G13110		BjuVA09G20070
BjuVB06G49380	BjuVA09G53070	BjuVB02G35060	BjuVA04G29130	BjuVA02G05120			BjuVB04G42830		BjuVA05G03740		BjuVB05G29690
BjuVA09G42630	BjuVB03G01840	BjuVA06G06440	BjuVA06G15020	BjuVB04G14710			BjuVB05G12860		BjuVB02G06820		BjuVB07G08510
BjuVA06G27160	BjuVA10G10370	BjuV_Contig00784G00240	BjuVA04G05930	BjuVA08G19880			BjuVB07G02470		BjuVB04G10620		BjuVA08G25630
BjuVA06G05540	BjuVA07G27820	BjuVB02G59030	BjuVB03G45290	BjuVB06G14380			BjuVB02G34300		BjuVB07G35410		BjuVB06G34560
BjuVA07G42920	BjuVB04G20750	BjuVB07G30720	BjuVB02G56880	BjuVB07G36290			BjuVB02G64540		BjuVA08G08110		BjuVB06G04690
BjuVB03G19400	BjuVA03G30050	BjuVB08G31330	BjuVB07G40630	BjuVB04G03430			BjuVA06G08230		BjuVA03G40780		BjuVB08G29880
BjuVA05G34830	BjuVA03G59420	BjuVB06G07180	BjuVB07G20470	BjuVA03G31410			BjuVB08G13590		BjuVA06G05370		BjuVA03G47210
BjuVB07G12400	BjuVB07G20610	BjuVA02G06800	BjuVB04G05480				BjuVA05G34530		BjuVB05G59030		BjuVA01G01170
BjuVB01G07250	BjuVA06G35430	BjuVA08G20880	BjuV_Contig00925G00210				BjuVB05G55400		BjuVB02G50220		BjuVB02G11170
BjuVB03G50750	BjuVB03G34040	BjuVA03G06100	BjuVA02G43690				BjuVA03G15570		BjuVA01G40610		BjuVB04G51770
BjuVB02G07630	BjuVA07G44180	BjuVA02G13130	BjuVB03G23250				BjuVB04G19290		BjuVA09G24620		BjuVA08G02330
BjuV_Contig00458G00090	BjuVA03G09940	BjuVB01G03010	BjuVA01G12000				BjuVA08G21410		BjuVA01G09770		BjuVB01G23520
BjuVA03G23850	BjuVB02G49860	BjuVB01G12900	BjuV_Contig00807G00010				BjuVA04G22940		BjuVA03G44220		BjuVB02G56190
BjuVB07G40770	BjuVB05G45570	BjuVB04G00320	BjuVB02G44350				BjuVA07G25460		BjuVB02G49460		BjuVB07G28560
BjuVB04G40090	BjuVB01G33800	BjuVA02G25070	BjuVB02G74530				BjuVA05G09350		BjuVA09G55940		BjuVA05G31350
BjuVB05G07260	BjuVB06G43850	BjuVA10G33950	BjuVA05G06610				BjuVA01G11250		BjuVB03G48000		BjuVA02G44770
BjuVB01G41400	BjuVA03G28990	BjuVA06G46550	BjuVA04G18600				BjuV_Contig00934G00130		BjuVB01G26270		BjuVB06G26570
BjuVA06G20080	BjuVB08G30210	BjuVA09G64180	BjuVB04G35690				BjuVA05G13920		BjuVB04G48810		BjuVB01G48840
BjuVB08G00610	BjuVA06G40510	BjuVB01G31000	BjuVB06G26110				BjuVB08G34020		BjuVB01G19680		BjuVA08G31390
BjuVB05G14760		BjuVA10G15170	BjuVA01G42280				BjuVA08G12370		BjuVB08G18470		BjuVB08G13680
BjuVB01G44830		BjuVB05G22350	BjuVA06G35770				BjuVA10G25430		BjuVA09G40900		BjuVA05G33640
BjuVB04G36110		BjuVB07G07810	BjuVB05G06170				BjuVA04G02600		BjuVA08G32540		BjuVB03G03870
BjuVB03G02950		BjuVB07G08750	BjuVB03G18370				BjuVB03G05360		BjuVB06G15320		BjuVA09G63480
BjuVB04G36270		BjuVB05G33440	BjuVA04G10940				BjuVB02G30850		BjuVA07G04170		BjuVB06G09920
BjuVB08G13030		BjuVA03G63800	BjuVA07G38690				BjuVA06G07320		BjuVB01G03480		BjuVB07G18750
BjuVB01G28980		BjuVB06G12370	BjuVB06G11500				BjuVA02G24600		BjuVA09G59370		BjuVA03G40970
BjuVA05G08660		BjuVB03G10750	BjuVA02G45680				BjuVA09G02880		BjuVA09G59610		BjuVA03G00310
BjuVB08G12110		BjuVA06G05820	BjuVA03G53480				BjuVB06G09160		BjuVB04G28530		BjuVA06G16450
BjuVA02G30440		BjuVB07G06140	BjuVB06G08960				BjuVB02G69360		BjuVB06G20460		BjuVB04G40210
BjuVB03G17180		BjuV_Contig00518_ERROPOS2626043G00010	BjuVA04G06810				BjuVB03G27820		BjuVA07G41070		BjuVB06G12320
BjuVA03G42760		BjuVB05G54220	BjuVA02G09880				BjuVB02G41270		BjuVB03G11030		BjuVA01G03620
BjuVA05G08600		BjuVB04G10060	BjuVA01G27410				BjuVA09G42640		BjuVA01G28360		BjuVA07G18360
BjuVA09G21280		BjuVB05G26540	BjuVA06G28860				BjuVB03G11280		BjuVB02G73210		BjuVB08G36270
BjuVA08G37420		BjuVB03G00090	BjuVB04G18840				BjuVA03G09730		BjuVA07G30260		BjuVB02G44580
BjuVA05G19140		BjuVA09G20890	BjuVB07G13550				BjuVB02G25830		BjuVA07G40690		BjuVA06G29650
BjuVB02G72990		BjuVB06G25920	BjuVA01G40420				BjuVB02G54650		BjuVA09G55930		BjuVA07G36620
BjuVB01G15690		BjuVA09G02420	BjuVB03G33600				BjuVB07G33030		BjuVA01G04060		BjuVB08G28970
BjuVA03G42650		BjuVB03G18840	BjuVB03G28420				BjuVB05G27780		BjuVA08G30380		BjuVB03G22600
BjuVA02G22350		BjuVA08G17300	BjuVB08G06510				BjuVB03G46560		BjuVB02G16350
BjuVB06G56680		BjuVA01G02120	BjuVB03G06370				BjuVA03G05630		BjuVA01G01760
BjuVB04G33080		BjuVB05G13720	BjuVA03G04880				BjuVA10G26190		BjuVA03G59870
BjuVB06G38880		BjuVA07G15840	BjuVB04G46500				BjuVB01G31870		BjuVA03G49380
BjuVB06G52720		BjuVA06G00060	BjuVA09G44170				BjuVB02G64170		BjuVB06G21070
BjuVB04G34090		BjuVA09G46440	BjuVB04G05110				BjuVB04G14630		BjuVB07G18680
BjuVA05G27320		BjuVA10G33660	BjuVA10G18980				BjuVB06G02930		BjuVB08G18830
BjuVB06G14930		BjuVA07G03370	BjuVB03G14470				BjuVA05G15900		BjuVB04G14210
BjuVB08G53620		BjuVA01G09410	BjuVB04G34680				BjuVA07G14710		BjuVB04G32180
BjuVA03G11900		BjuVB08G28590	BjuVB07G16760				BjuVA03G26510		BjuVB01G34230
BjuVB02G46670		BjuVB05G24660	BjuVA01G04810				BjuVA10G32890		BjuVB06G41440
BjuVA08G19920		BjuVB04G26170	BjuVA06G27900				BjuVA10G15220		BjuVB08G04370
BjuVB08G04190		BjuVA02G42680	BjuVB07G30580				BjuVA08G24300		BjuVA02G24040
BjuVA06G38000		BjuVA09G02730	BjuVB03G43670				BjuVB08G39360		BjuVA06G00040
BjuVA08G17290		BjuVB04G46970	BjuVA09G52220				BjuVA09G20920		BjuVB08G21050
BjuVB06G19720		BjuVB08G24910	BjuVB04G08290				BjuVB08G36230		BjuVA09G16760
BjuVA10G33300		BjuVB05G09870	BjuVA09G04920				BjuVB06G32690		BjuVB04G17610
BjuVB08G16430		BjuVB08G00800	BjuVA01G02750				BjuVA10G19380		BjuVA03G19470
BjuVB06G27310		BjuVA03G10790	BjuVB04G48490				BjuVA09G50250		BjuVA06G09980
BjuVA02G39200		BjuVA03G07190	BjuVB08G19690				BjuVB02G24790		BjuVA02G47540
BjuVB01G07090		BjuVB04G39850	BjuVA03G45580				BjuVA06G29940		BjuVA09G54610
BjuVB02G37990		BjuVB07G22720	BjuVB03G05520				BjuVA09G42210		BjuVA03G28700
BjuVB01G16620		BjuVB02G44330	BjuV_Contig00578G00040				BjuVA10G18570		BjuVA05G23270
BjuVA03G13210		BjuVB06G34180	BjuVA07G32110				BjuVB06G11670		BjuVA05G42530
BjuVA04G23340		BjuVA05G24580	BjuVA02G04810				BjuVB06G13270		BjuVA01G16940
BjuVB06G13510		BjuVA02G25480	BjuVA07G17990				BjuVB08G42530		BjuVB06G41060
BjuVB05G00560		BjuVB07G30890	BjuVB07G02780				BjuVB08G04180		BjuVB07G37590
BjuVA02G47740		BjuVA09G36800	BjuVB04G50590				BjuVB08G25540		BjuVB06G37910
BjuVB08G26980		BjuVB08G35190	BjuVB04G28400				BjuVA03G57760		BjuVA03G05840
BjuVA01G17130		BjuVA08G31910	BjuVA03G24310				BjuVB03G48390		BjuVA03G12880
BjuVA09G16080		BjuVA09G58720	BjuVB01G29930				BjuVA01G19270		BjuVB01G18990
BjuVB05G32730		BjuVB03G14260	BjuVA08G24330				BjuVB07G03820		BjuVA02G44650
BjuVA05G39010		BjuVB07G48170	BjuVA06G00750				BjuVA02G24440		BjuVB04G22950
BjuVA06G05520		BjuVB07G48430	BjuVB05G13830				BjuVA03G16450		BjuVB01G23120
BjuVB06G33290		BjuVA08G19840	BjuVB06G13000				BjuVA02G14700		BjuVB05G23200
BjuVA09G51970		BjuVB04G31350	BjuVA09G61660				BjuVB01G39430		BjuVA04G18840
BjuVB03G24060		BjuVB03G18050	BjuVB07G33230				BjuVB01G45050		BjuVA06G01900
BjuVA04G09350		BjuVB02G26540	BjuVA08G38050				BjuVA02G08100		BjuVA07G27700
BjuVA05G40560		BjuVA07G29380	BjuVA03G29340				BjuVA03G58930		BjuVB05G09020
BjuVB08G07800		BjuVB05G57580	BjuVA09G58070				BjuVB04G23550		BjuVA01G08590
BjuVB01G39840		BjuVA01G41130	BjuVB02G58130				BjuVB01G39880		BjuVB06G22700
BjuVA09G38530		BjuVB06G52730	BjuVB06G34120				BjuVB07G35960		BjuVA02G04460
BjuV_Contig00907G00010		BjuVA08G20830	BjuVA02G00180				BjuVA10G15600		BjuVA08G17320
BjuVA08G29300		BjuVB05G01790	BjuVB02G60110				BjuVA03G19660		BjuVA05G28770
BjuVA06G30240		BjuVA02G21300	BjuVA01G37970				BjuVA06G09820		BjuVA01G00910
BjuVA08G15540		BjuVB02G69190	BjuVA01G07200				BjuVB01G12320		BjuVB06G44170
BjuVB04G36850		BjuVB07G00790	BjuVA03G02230				BjuVB08G10640		BjuVB04G26290
BjuVA08G21430		BjuVB08G06950	BjuVB05G45660				BjuVB04G05880		BjuVA03G14750
BjuVB06G00350		BjuVB04G46980	BjuVA09G01030				BjuVB03G46380		BjuVB03G25690
BjuVB05G19920		BjuVB08G24370	BjuVB07G06220				BjuVA09G42540		BjuVA03G21900
BjuVA02G31460		BjuVA07G41060	BjuVB07G30450				BjuVA05G27670		BjuVB02G29900
BjuVA03G31110		BjuVB07G02670	BjuVA05G42450				BjuVA03G30310		BjuVB05G07180
BjuVB08G52360		BjuVB02G41710	BjuVB07G42060				BjuVB03G20520		BjuVB02G20780
BjuVB04G01840		BjuVB01G47860	BjuVB03G34840				BjuV_Contig00580_ERROPOS930405+G00330		BjuVA07G01890
BjuVA05G39980		BjuVA03G16510	BjuVA01G29890				BjuVA08G18500		BjuVB07G10440
BjuVB06G01960		BjuVB07G11610	BjuVB05G02230				BjuVB03G48380		BjuVB04G32290
BjuVA08G07650		BjuVA04G34450	BjuVA09G44060				BjuVA10G32600		BjuVB06G42330
BjuVA05G12350		BjuVB02G45570	BjuVA03G22690				BjuVB03G08730		BjuVA09G60220
BjuVA09G19770		BjuVB01G18390	BjuVB03G13030				BjuVB05G11000		BjuVA06G20280
BjuVA03G23220		BjuVA05G10890	BjuVB04G36970				BjuVA07G38780		BjuVB08G52830
BjuVA09G22480		BjuVB03G04860	BjuVA02G37850				BjuVA05G32000		BjuVA03G34620
BjuVA04G08710		BjuVB08G01080	BjuVB08G21290				BjuVB03G42720		BjuVA04G29850
BjuVA06G48140		BjuVB01G00590	BjuVB07G10470				BjuVB08G32090		BjuVA03G57620
BjuVB03G24470		BjuVA04G17360	BjuVB07G15880				BjuVB08G52910		BjuVB05G51840
BjuVB07G40400		BjuVB03G26620	BjuVB04G24640				BjuVB03G27730		BjuVA03G45970
BjuVB01G43800		BjuVA02G19550	BjuVB02G69320				BjuVA05G34910		BjuVB03G43260
BjuVA04G07970		BjuVB05G16230	BjuVB04G15700				BjuVA06G35740		BjuVA03G21670
BjuVB06G21820		BjuVB04G27280	BjuVB03G12340				BjuVB02G37190		BjuVA06G01330
BjuVA05G00510		BjuVB07G20010	BjuVA06G29640				BjuVA07G09410		BjuVA05G41630
BjuVB01G31300		BjuVB01G19690	BjuVA04G04730				BjuVB06G23880		BjuVA05G17020
BjuVB03G42680		BjuVA04G32370	BjuVB02G24080				BjuVA03G32110		BjuVB03G38880
BjuVA02G28860		BjuVB02G43930	BjuVB05G11060				BjuVB05G02620		BjuVA02G01190
BjuVB01G06880		BjuVB05G18090	BjuV_Contig00886G00080				BjuVB01G41300		BjuVA01G01990
BjuVB03G06000		BjuVA09G25220	BjuVA09G13240				BjuVB05G41640		BjuVA01G23790
BjuVA09G36620		BjuVA07G10250	BjuVB02G46640				BjuVB05G13680		BjuVB08G17450
BjuVA03G02750		BjuVB05G13740	BjuVB03G16070				BjuVA09G05210		BjuVB01G33500
BjuVB02G75530		BjuVA06G29970	BjuVA07G37610				BjuVA08G19470		BjuVA07G29600
BjuVA09G05830		BjuVB01G08880	BjuVB04G47160				BjuVB04G15980		BjuVB03G03390
BjuVA06G00570		BjuVA09G68680	BjuVB04G04440				BjuVB07G23540		BjuVA06G14780
BjuVA03G49750		BjuVA09G17030	BjuVB05G35190				BjuVB01G39450		BjuVB03G44600
BjuVB08G48070		BjuVA09G43630	BjuVB02G33820				BjuVB08G59030		BjuVB06G37360
BjuVA07G40210		BjuVA07G27180	BjuVB05G06480				BjuVB02G64160		BjuVB07G01230
BjuVA01G20850		BjuVB02G32280	BjuVB02G34380				BjuVB01G48860		BjuVA03G56390
BjuVA09G61540		BjuVA03G08900	BjuVA02G25550				BjuVB02G54970		BjuVB06G35690
BjuVB04G01480		BjuVA03G51540	BjuVA06G04150				BjuVA04G25680		BjuVA01G19940
BjuVB02G65760		BjuVA01G26160	BjuVA09G62230				BjuVB05G29700		BjuVB07G15580
BjuVA03G32750		BjuVA03G24560	BjuVA09G21200				BjuVA06G11270		BjuVB04G47460
BjuVB06G03490		BjuVA02G47600	BjuVA01G38290				BjuVB01G29920		BjuVB03G37970
BjuVA03G19550		BjuVB02G74120	BjuVA02G18740				BjuVA08G21590		BjuVA06G07620
BjuVB06G48660		BjuVB05G09300	BjuVA06G42420				BjuVA10G11990		BjuVB06G01060
BjuVB02G75890		BjuVA07G44650	BjuVB05G08890				BjuVB04G08990		BjuVA01G40600
BjuVB06G56860		BjuVA10G20730	BjuVA09G05870				BjuVB04G25630		BjuVA06G01600
BjuVB06G08380		BjuVB04G35750	BjuVA10G30040				BjuVB05G47290		BjuVA04G18010
BjuVA03G05060		BjuVA01G20760	BjuVA09G40920				BjuVA08G25190		BjuVB02G26480
BjuVA09G04770		BjuVB02G12360	BjuVA01G40100				BjuVA08G13620		BjuVB08G12880
BjuVB05G07970		BjuVB01G15160	BjuVA09G60560				BjuVA03G26190		BjuVB04G40840
BjuVA01G17510		BjuVB06G58270	BjuVA07G44950				BjuVB04G01960		BjuVB03G47470
BjuVA03G49490		BjuV_Contig00581G00230	BjuVA07G37360				BjuVA07G21260		BjuVB07G06930
BjuVB08G46870		BjuVB08G58890	BjuVA03G21970				BjuVB01G34700		BjuVA01G25120
BjuVA05G27250		BjuVA06G05860	BjuVB03G52490				BjuVB08G07550		BjuVA01G42500
BjuVA09G15420		BjuVA03G23410	BjuVB08G10120				BjuVB03G29630		BjuVB03G29820
BjuVA03G09680		BjuVB07G29830	BjuVA05G38350				BjuVA01G12610		BjuVA02G29430
BjuVB01G29480		BjuVB01G45030	BjuVB03G55300				BjuVA10G22170		BjuVA02G05990
BjuVA05G04190		BjuVA07G28870	BjuVB02G56610				BjuVB06G34570		BjuVB01G40370
BjuVB01G06780		BjuVA05G04540	BjuVB05G42790				BjuVA02G09180		BjuVA06G41130
BjuVB05G36790		BjuVB04G19550	BjuVB08G24060				BjuVA06G08760		BjuVA07G12060
BjuVB04G20180		BjuVB04G04210	BjuVB06G04360				BjuVB02G41860		BjuVB06G04270
BjuVB04G36860		BjuVA09G03620	BjuVA06G34020				BjuVA09G08720		BjuVA03G62710
BjuVA06G05480		BjuVB04G43170	BjuVB04G48590				BjuVB07G19580		BjuVB08G11050
BjuVB03G18980		BjuVB03G49330	BjuVA09G54670				BjuVA04G17910		BjuV_Contig00450G00210
BjuVA01G21230		BjuVB06G20970	BjuVB06G11050				BjuVA07G31310		BjuVB03G22750
BjuVB03G35690		BjuVB06G01010	BjuVB03G44140				BjuVA07G13120		BjuVA03G40940
BjuVB02G41770		BjuVA06G17380	BjuVA03G24000				BjuVB01G05960		BjuVA07G43420
BjuVB06G54750		BjuVA02G02970	BjuVA01G12640				BjuVA03G64350		BjuVB05G09420
BjuVA09G38930		BjuVA05G01700	BjuVB06G37060				BjuVA08G13440		BjuVA03G47820
BjuVA06G38740		BjuVA07G32300	BjuVB08G37100				BjuVB05G37560		BjuVB05G29480
BjuVB08G50780		BjuVA06G12890	BjuVA04G03790				BjuVB08G38510		BjuVB01G41290
BjuVA04G05570		BjuVB02G00110	BjuVB03G19850				BjuVB06G37050		BjuVB06G32960
BjuVA08G35000		BjuVB04G05990	BjuVA09G41960				BjuVA03G11670		BjuVA02G25620
BjuVA09G19200		BjuVA01G08920	BjuVB05G41660				BjuVB02G11820		BjuVB06G32410
BjuVB03G03220		BjuVB05G11010	BjuVB01G07150				BjuVB04G36720		BjuVA03G07630
BjuVA03G33170		BjuVA01G06350	BjuVB07G48830				BjuVA02G40190		BjuVB04G35830
BjuVB05G18880		BjuVB08G23920	BjuVA02G37950				BjuVB08G26500		BjuVA06G40710
BjuVB08G10410		BjuVA03G48870	BjuVA07G32520				BjuVA04G29830		BjuVB04G14660
BjuVB05G29910		BjuVA03G00750	BjuVA10G07640				BjuVA03G03620		BjuVA08G33170
BjuV_Contig01033G00120		BjuVA01G29270	BjuVA08G33900				BjuVB04G15870		BjuVB05G51680
BjuVA09G22520		BjuVA09G37940	BjuVA07G11410				BjuVB02G10390		BjuVB01G04570
BjuVA10G19910		BjuVB02G30040	BjuVA01G41810				BjuVB07G23790		BjuVA05G07300
BjuVB06G05530		BjuVA05G13280	BjuVA09G40220				BjuVB02G63800		BjuVB03G37990
BjuVA01G29190		BjuVB05G08260	BjuVB05G37380				BjuVB03G45930		BjuVA06G03110
BjuVA06G37840		BjuVA05G37820	BjuVB08G03430				BjuVA08G07700		BjuVA03G04780
BjuVA03G16860		BjuVB03G43230	BjuVA01G11620				BjuVB06G41860		BjuVA06G36670
BjuV_Contig00265G00090		BjuVA04G34720	BjuVA06G12440				BjuVB04G42700		BjuVB07G26970
BjuVA03G02770		BjuVA08G23210	BjuVA02G01020				BjuVB04G02460		BjuVA06G05880
BjuVA10G21400		BjuVB06G47380	BjuVB08G59150				BjuVA08G38390		BjuVA07G33270
BjuVB06G42440		BjuVA03G13520	BjuVA03G02140				BjuVA06G00080		BjuVB05G07980
BjuVA06G30790		BjuVB08G35860	BjuVA06G12450				BjuVA09G10990		BjuVA03G36220
BjuVB07G04320		BjuVB06G39930	BjuVB07G26060				BjuVB06G54390		BjuVB05G18580
BjuVA08G20920		BjuVA04G17450	BjuVA05G33250				BjuVB06G33140		BjuVA02G49070
BjuVA09G18360		BjuVB06G04220	BjuVB03G42850				BjuVB08G30900		BjuVB07G20700
BjuVA02G02890		BjuVA05G43570	BjuVA06G06550				BjuVB05G48370		BjuVB08G11280
BjuVA10G23910		BjuVA08G38260	BjuVA03G35720				BjuVB04G32190		BjuVB01G01950
BjuVB06G33970		BjuVA01G19350	BjuVA06G29630				BjuVB02G13280		BjuVB04G29700
BjuVB06G51870		BjuV_Contig00937G00180	BjuVB02G67050				BjuVA05G07640		BjuVB02G65560
BjuVA09G53430		BjuVB06G08530	BjuVB07G06110				BjuVB03G20760		BjuVA07G31500
BjuVB07G15070		BjuVB05G06590	BjuVB04G03450				BjuVA07G12580		BjuVB07G48630
BjuVB03G50800		BjuVB08G33980	BjuVA08G24170				BjuVA05G15260		BjuVA06G00700
BjuVB07G03170		BjuVB02G64790	BjuVA08G21930				BjuVB08G14060		BjuVB06G40600
BjuVB08G35670		BjuVB01G35880	BjuVA04G22660				BjuVA10G29880		BjuVA06G34260
BjuVA10G02640		BjuVA02G49100	BjuVB07G19290				BjuVB01G39890		BjuVB02G13410
BjuVB04G34340		BjuVA03G04100	BjuVB03G12830				BjuVA06G48270		BjuVB05G55520
BjuVA09G58740		BjuVA02G09990	BjuVB03G57530				BjuVA05G39590		BjuVA03G09430
BjuVA04G33550		BjuVA08G22810	BjuVB08G22200				BjuVA08G28060		BjuVA03G15150
BjuVB08G11790		BjuVB03G26160	BjuVB03G07870				BjuVA10G31770		BjuVB06G40830
BjuVB05G11380		BjuVB08G54610	BjuVB06G18770				BjuVB04G02160		BjuVB05G11200
BjuVB08G52480		BjuVB04G35820	BjuVB07G36820				BjuVA01G37400		BjuVB06G11810
BjuVB01G13820		BjuVB06G15790	BjuVB03G17590				BjuVB06G34360		BjuVB01G02190
BjuVA05G06590		BjuVA07G22570	BjuVB03G39080				BjuVB03G49400		BjuVA10G22570
BjuVB05G19240		BjuVB02G60010	BjuVB02G46480				BjuVB08G50830		BjuVA07G29830
BjuVB08G25490		BjuVB03G19390	BjuVA04G30290				BjuVB06G22320		BjuVA08G26340
BjuVA02G09350		BjuVA09G66690	BjuVB02G07810				BjuVB07G34850		BjuVB02G71840
BjuVB08G17750		BjuVA05G08750	BjuVA09G49640				BjuVA07G32320		BjuVA03G29770
BjuVA05G25420		BjuVB03G35020	BjuVA08G34380				BjuVB01G05950		BjuVB02G47600
BjuVB08G34890		BjuVA01G40010	BjuVA09G65030				BjuVB01G31890		BjuVA03G31860
BjuVB06G22150		BjuVA03G29630	BjuVA07G06910				BjuVA10G29750		BjuVA02G06570
BjuVB05G33610		BjuVB03G31360	BjuVA03G37180				BjuVB04G01210		BjuVB05G58600
BjuVA05G08210		BjuVA07G14870	BjuVA04G23160				BjuVB02G66660		BjuVA07G26100
BjuVA03G01500		BjuVB07G10680	BjuVB06G36150				BjuVA09G20500		BjuVB05G55380
BjuVB06G39450		BjuVA09G23170	BjuVA04G29960				BjuVB04G09440		BjuVB01G38220
BjuVA03G18720		BjuVB02G33160	BjuVB03G14910				BjuVA06G05330		BjuVB05G26310
BjuVB08G13100		BjuVA02G27880	BjuVB07G13910				BjuVB02G53370		BjuVB08G11390
BjuVA08G12160		BjuVB02G60000	BjuVB08G15640				BjuVB08G20500		BjuVB02G27620
BjuVA10G28540		BjuVB06G24150	BjuVA03G46770				BjuVA02G34530		BjuVB03G14750
BjuVB03G22100		BjuVA03G43930	BjuVA05G40000				BjuVB01G36460		BjuVB07G46090
BjuVB06G08610		BjuVA06G27810	BjuVB05G34560				BjuVA03G63340		BjuVB01G02850
BjuVB08G15580		BjuVA01G21590	BjuVA02G38780				BjuVB04G12070		BjuVB01G05350
BjuVB06G55440		BjuVA09G32900	BjuVB06G06670				BjuVA04G04680		BjuVB04G02010
BjuVA10G21970		BjuVB08G46800	BjuVB08G18230				BjuVB08G25800		BjuVB06G21230
BjuVA06G05100		BjuVA04G34270	BjuVB02G71830				BjuVB03G03450		BjuVA03G02570
BjuVA02G33320		BjuVA10G29640	BjuVB08G40070				BjuVB02G31380		BjuVA04G30720
BjuVB07G25240		BjuVA01G01420	BjuVB05G24740				BjuVB07G20720		BjuVB02G63590
BjuVB06G00150		BjuVA02G49460	BjuVA01G01430				BjuVB03G08330		BjuVA02G42140
BjuVB05G26640		BjuVA08G29700	BjuVB02G69610				BjuVB05G36960		BjuVA05G24810
BjuVB04G17510		BjuVA01G21420	BjuVA03G24200				BjuVB01G08710		BjuVA02G13410
BjuVB04G15590		BjuVB07G48160	BjuVA08G36480				BjuVB01G46850		BjuVB01G42090
BjuVB02G28710		BjuVB08G46940	BjuV_Contig00580_ERROPOS930405+G00150				BjuVA06G09910		BjuVA10G03480
BjuVB04G15060		BjuVA06G25810	BjuVB07G05250				BjuVB03G05670		BjuVA08G17360
BjuVB05G10380		BjuVB02G02800	BjuVA04G12150				BjuVA04G21830		BjuVA02G37550
BjuVB02G40840		BjuVA09G54390	BjuVB01G02470				BjuVA07G04960		BjuVB02G64250
BjuVB04G28300		BjuVA10G23140	BjuVA07G15750				BjuVA05G13080		BjuVB02G31400
BjuVB07G25880		BjuVA09G16940	BjuVB02G74090				BjuVB02G56640		BjuVA07G38520
BjuVB06G08790		BjuVB06G44590	BjuVB05G45280				BjuVB06G17240		BjuVB06G06710
BjuVA09G50630		BjuVA06G43010	BjuVB07G09120				BjuVA02G21990		BjuVB01G06180
BjuVA05G30880		BjuVA05G07620	BjuVB02G44030				BjuVA07G25990		BjuVA04G04460
BjuVA04G27930		BjuVB02G30590	BjuVB04G14830				BjuVB04G49940		BjuVA02G39250
BjuVB04G05500		BjuVA07G41360	BjuVB01G21350				BjuVA09G06670		BjuVB03G16720
BjuVA09G59890		BjuVB05G58090	BjuVB04G17500				BjuVB06G16110		BjuVB04G01290
BjuVA08G38370		BjuVA08G00600	BjuVA02G45610				BjuVB06G35250		BjuVB01G48440
BjuVA03G03850		BjuVA03G46950	BjuVA02G17740				BjuVA02G02210		BjuVB03G54250
BjuVB03G13350		BjuVB05G18820	BjuVB03G04950				BjuVB01G18160		BjuVB03G15660
BjuVA09G55810		BjuVA02G22770	BjuVA01G17840				BjuVB06G55990		BjuVB05G12030
BjuVB03G11070		BjuVB05G55200	BjuVA10G32620				BjuVB06G56570		BjuVA06G08740
BjuVA06G10050		BjuVB04G38660	BjuVA05G29030				BjuVA03G19640		BjuVA06G19010
BjuVB02G36020		BjuVA06G21360	BjuVB07G21460				BjuVB04G08900		BjuVB04G48230
BjuVB04G47630		BjuVA06G04800	BjuVA06G38240				BjuVB02G70680		BjuVB02G61570
BjuVB03G11660		BjuVB02G65900	BjuVA05G00150				BjuVB02G11310		BjuVB08G13210
BjuVA09G21880		BjuVA08G38270	BjuVB02G73850				BjuVA02G02500		BjuVB07G02700
BjuVA08G06490		BjuVB07G19970	BjuVA01G02630				BjuVA09G42300		BjuVA09G37770
BjuVB02G69020		BjuVA05G32080	BjuVA08G09430				BjuVA06G12610		BjuVA06G01340
BjuVB06G06260		BjuVB03G09390	BjuVA06G12620				BjuVB04G20010		BjuVA08G21990
BjuVA03G33510		BjuVB08G29470	BjuVA05G08900				BjuVB08G25720		BjuVA06G12430
BjuVB07G21580		BjuVA07G00180	BjuVB07G02070				BjuVA03G25810		BjuVA07G18530
BjuVA04G02620		BjuVB08G52940	BjuVA10G20990				BjuVB06G51960		BjuVA08G24850
BjuVB03G13870		BjuVB01G21100	BjuVB02G02830				BjuVA03G20900		BjuVA02G03140
BjuVB01G42300		BjuVB08G04640	BjuVB01G47540				BjuVB05G25140		BjuVB08G17230
BjuVB03G15610		BjuVB03G06260	BjuVA06G14590				BjuVB05G14790		BjuVA09G58500
BjuVB06G17150		BjuVB03G41170	BjuVA03G14370				BjuVB03G54820		BjuVB08G47310
BjuVA05G15780		BjuVA10G01000	BjuVB08G01720				BjuVA03G42230		BjuV_Contig00863G00240
BjuVB08G35930		BjuVB07G28500	BjuVA09G25120				BjuVB03G15530		BjuVB08G04440
BjuVB08G39000		BjuVB02G40710	BjuVB06G06290				BjuVA03G58330		BjuVB06G25010
BjuVA09G04810		BjuVA06G29240	BjuVA08G32920				BjuVB03G10680		BjuVA07G04520
BjuVB08G08140		BjuVA01G43910	BjuVA01G03520				BjuVA10G12260		BjuVA09G48970
BjuVA09G23270		BjuVA03G64590	BjuVB06G24680				BjuVA10G30200		BjuVB06G57940
BjuVA01G28430		BjuVA02G00910	BjuVA07G05880				BjuVB01G37050		BjuVA07G42440
BjuVA03G26650		BjuVA04G16070	BjuVB08G37890				BjuVA09G38550		BjuVA05G27870
BjuVB02G49270		BjuVA09G23560	BjuVA09G16690				BjuVB02G60940		BjuV_Contig00867G00130
BjuVB06G08440		BjuVA08G25950	BjuVB02G09490				BjuVB02G75010		BjuVA08G27430
BjuVA05G32100		BjuVA09G46040	BjuVA04G33890				BjuV_Contig00017G00050		BjuVA09G65480
BjuVA05G02260		BjuVB08G02090	BjuVB03G27210				BjuVA05G08920		BjuV_Contig00581G00240
BjuVA10G17290		BjuVA05G04610	BjuVB03G04700				BjuVB03G17270		BjuVA07G28520
BjuVA02G07480		BjuVB02G33790	BjuVA07G33620				BjuVA03G63260		BjuVB06G25530
BjuVA10G02610		BjuVA03G31330	BjuVA01G31930				BjuVB04G34490		BjuVA02G48290
BjuVB08G09670		BjuVB02G63810	BjuVA02G21070				BjuVB08G26370		BjuVA06G31950
BjuVB05G26100		BjuVA03G24550	BjuVA05G08090				BjuVB02G56010		BjuVA02G27490
BjuV_Contig00683G00170		BjuVB08G07300	BjuVA07G16970				BjuVA08G30330		BjuVA07G40990
BjuVA07G37460		BjuVA08G04440	BjuVB05G58040				BjuVA03G27220		BjuVB01G38140
BjuVA03G23240		BjuVB02G69110	BjuVB08G11350				BjuVA02G06770		BjuVB08G45480
BjuVA08G29310		BjuVA10G32280	BjuVA06G44820				BjuVA08G18640		BjuVB02G48080
BjuVA02G16400		BjuVB05G01940	BjuVB06G52180				BjuVA03G15880		BjuVB05G17270
BjuVB01G07940		BjuVA07G39870	BjuVA09G20200				BjuVB08G59300		BjuVA02G46690
BjuVB01G00710		BjuVB04G34080	BjuVA04G16080				BjuVA07G23450		BjuVB03G30220
BjuVA09G16290		BjuVB06G37530	BjuVB03G06440				BjuVA09G07450		BjuVB01G01270
BjuVB02G25190		BjuVB02G54490	BjuVB01G33160				BjuVB04G37710		BjuVB02G68190
BjuVB03G55010		BjuVB05G53490	BjuVB06G43350				BjuVA02G02010		BjuVA04G30640
BjuVB03G08820		BjuVA01G40000	BjuVB08G04310				BjuVA02G12650		BjuVB08G17790
BjuV_Contig00875G00110		BjuVB04G35630	BjuVA06G05380				BjuVB02G24990		BjuVA03G68550
BjuVB03G58280		BjuVA09G03220	BjuVA01G01830				BjuVA02G19300		BjuVB04G23240
BjuVA06G18840		BjuVB01G05940	BjuVA08G12390				BjuVB03G32130		BjuVA06G28410
BjuVB05G10980		BjuVB03G49460	BjuVB08G29420				BjuVA08G10380		BjuVB01G14400
BjuVB02G38710		BjuVB02G23020	BjuVB03G21990				BjuVB03G45220		BjuVB02G09480
BjuVB04G33470		BjuVB06G44700	BjuVB08G09190				BjuVB08G46540		BjuVB02G33030
BjuVA05G28580		BjuVB02G43390	BjuVA09G22830				BjuVA09G48750		BjuVA02G47560
BjuVA03G35340		BjuVA07G10740	BjuVB07G26400				BjuVA02G19610		BjuVB02G03530
BjuVA06G16890		BjuVB08G38480	BjuVA01G09970				BjuVB03G09790		BjuVB02G15250
BjuVA04G13800		BjuVB01G39080	BjuVA09G69080				BjuVA05G09320		BjuVA02G19530
BjuVB01G32770		BjuVA01G02730	BjuVB08G50370				BjuVA01G40270		BjuVA09G47080
BjuVA05G05360		BjuVB06G16460	BjuVA07G27460				BjuVB05G12680		BjuVB03G43380
BjuVB08G51870		BjuVA05G44110	BjuVB05G36880				BjuVB05G53190		BjuVA08G25620
BjuVB05G52940		BjuVA07G40670	BjuVA07G10200				BjuVA05G30420		BjuVB05G22460
BjuVA03G56040		BjuVB05G52490	BjuVB05G13570				BjuVA08G32660		BjuVB07G17270
BjuVB02G17230		BjuVB05G02710	BjuVB06G03120				BjuVB08G39650		BjuVA07G40950
BjuVB08G13090		BjuVB02G61530	BjuVA06G01500				BjuVB03G43600		BjuVB02G74000
BjuVA01G23110		BjuVB03G55450	BjuVA03G10850				BjuVA05G03710		BjuVB03G45210
BjuVB01G29200		BjuVB08G31860	BjuVB03G02750				BjuVA09G62320		BjuVA04G22780
BjuVA01G37080		BjuVB04G38700	BjuVB02G52080				BjuVB05G03560		BjuVA02G09310
BjuVB05G51270		BjuVA07G44710	BjuVA02G44340				BjuVB05G06200		BjuVB03G12120
BjuVA03G15240		BjuVB01G32010	BjuVA09G48020				BjuVB07G16670		BjuVA05G01310
BjuVA03G54060		BjuVA06G41590	BjuVB04G31050				BjuV_Contig00807G00060		BjuVB05G24410
BjuVB08G54930		BjuVA08G13020	BjuVA09G29160				BjuVB03G03130		BjuVB02G05590
BjuVB08G23590		BjuVA03G12570	BjuVA05G04440				BjuVA02G24280		BjuVA09G10190
BjuVB03G46710		BjuVA02G38020	BjuVA01G18020				BjuVB08G47580		BjuVB04G26620
BjuVB08G55050		BjuVB02G57690	BjuVA09G35920				BjuVA04G04770		BjuVA04G12350
BjuVA02G01680		BjuVA05G01260	BjuVA01G01790				BjuVB02G71650		BjuVA08G23450
BjuVB05G02260		BjuVA05G41320	BjuVB03G31400				BjuVA05G07000		BjuVA01G37800
BjuV_Contig01041G00380		BjuVA06G06910	BjuVB05G57360				BjuVB01G01110		BjuVB02G04450
BjuVA06G26390		BjuVB07G13490	BjuVB05G07160				BjuVB05G10210		BjuVA07G35600
BjuVB02G35520		BjuVB03G41160	BjuVA04G05820				BjuVB03G28070		BjuVA01G00280
BjuVB01G07120		BjuVA06G35490	BjuVA09G50460				BjuVB06G36810		BjuVB06G48260
BjuVB01G13780		BjuVA08G27810	BjuVA09G38780				BjuV_Contig00453G00090		BjuVA01G05500
BjuVB06G37280		BjuVA07G18630	BjuVB05G25310				BjuVA07G37410		BjuVA09G58130
BjuVA06G45490		BjuVA09G10040	BjuVB04G42910				BjuVB02G75240		BjuVA06G31100
BjuVA05G09420		BjuVA07G29180	BjuVA06G15330				BjuVA02G34030		BjuVA02G22900
BjuVA01G37660		BjuVA07G29370	BjuVA08G22180				BjuVA10G32300		BjuVB07G24220
BjuVA02G33200		BjuVB01G11660	BjuVA06G05580				BjuVB01G29800		BjuVB07G21010
BjuVA06G34290		BjuVB02G26440	BjuVA06G34750				BjuVA10G30010		BjuVA08G00380
BjuVB04G08610		BjuVA06G38810	BjuVB01G41900				BjuVA02G28590		BjuVB06G23560
BjuVA09G56740		BjuVB01G11650	BjuVB01G05920				BjuVB01G45290		BjuVA06G44860
BjuVA09G39760		BjuVB07G15280	BjuVB03G32850				BjuVA06G00680		BjuVB01G43080
BjuVA10G32010		BjuVA08G22110	BjuVA09G49250				BjuVB04G07660		BjuVB05G13730
BjuVA08G10500		BjuVB07G16040	BjuVA08G25420				BjuVA07G24960		BjuVA03G18810
BjuVB07G26220		BjuVB07G27490	BjuVA02G43360				BjuVA02G09780		BjuVB04G04680
BjuVA01G19230		BjuVA02G28290	BjuVA07G22510				BjuVB04G50600		BjuVA06G39380
BjuVA05G25840		BjuVA04G23720	BjuVA03G56290				BjuVA03G30420		BjuVA08G23630
BjuVB03G15140		BjuVB03G33230	BjuVA09G14190				BjuVB01G38890		BjuVA10G29420
BjuVA09G50800		BjuVB05G00660	BjuVA03G02080				BjuVB06G33860		BjuVB03G11150
BjuVB05G32670		BjuVB05G58150	BjuVA05G10370				BjuVA03G05690		BjuVB06G02800
BjuVA03G61850		BjuVB06G37230	BjuVB06G19500				BjuVA06G19440		BjuVA03G34750
BjuVB08G05620		BjuVB07G29300	BjuVA09G64470				BjuVB01G42620		BjuVB03G22000
BjuVB02G32970		BjuVA03G44190	BjuVA09G41310				BjuVA08G24310		BjuVA09G50330
BjuVA02G44730		BjuVB01G07710	BjuVB07G36110				BjuVB02G65530		BjuVB02G74680
BjuVB08G56040		BjuVB01G13840	BjuVB03G05950				BjuVB05G17950		BjuVB02G00190
BjuVB02G34450		BjuVB06G52750	BjuVA03G36910				BjuVA08G11980		BjuVB06G11850
BjuVA03G20400		BjuVA07G20890	BjuVA07G13270				BjuVB06G37920		BjuVA09G37720
BjuVB08G56470		BjuVA08G35100	BjuVB03G43680				BjuVB04G40340		BjuVB07G39120
BjuVA03G40110		BjuVA06G21190	BjuVA06G40500				BjuVB06G15390		BjuVA06G05340
BjuVA01G41060		BjuVA03G56920	BjuVA07G15280				BjuVB01G36040		BjuVB05G49930
BjuVA08G12940		BjuVA06G20420	BjuVA10G30050				BjuVB03G00420		BjuVA06G14320
BjuVA02G20090		BjuVA01G35280	BjuVA01G36420				BjuVA09G26120		BjuV_Contig00855G00030
BjuVB06G07040		BjuVA03G06660	BjuV_Contig00784G00160				BjuVB03G34640
BjuVA03G07920		BjuVA04G20320	BjuVB04G28270				BjuVA09G56960
BjuVA03G63530		BjuVA02G46980	BjuVB01G48630				BjuVA06G12780
BjuVA06G06460		BjuVB02G51990	BjuVA06G31380				BjuVB03G34700
BjuVB07G05700		BjuVB03G59140	BjuVB04G03390				BjuVB02G58030
BjuVA07G04200		BjuVB03G15230	BjuVB03G39160				BjuVB06G40040
BjuVB02G29450		BjuVA07G35320	BjuVB06G20670				BjuVA09G32870
BjuVB01G30270		BjuVB04G34280	BjuVA08G01230				BjuVA10G04440
BjuVA08G35060		BjuVB04G37610	BjuVA02G47230				BjuVA03G52070
BjuVB03G57890		BjuVB02G70900	BjuVB02G56130				BjuVB04G31120
BjuVB04G37630		BjuVA08G14390	BjuVB02G64400				BjuVA07G45280
BjuVB03G19260		BjuVB06G21200	BjuVB08G05320				BjuVA04G02410
BjuVA10G26210		BjuVA01G02980	BjuVB03G33210				BjuVA06G41680
BjuVB05G10590		BjuVB08G25980	BjuVB08G52290				BjuVB02G70260
BjuVB02G09040		BjuVB06G37990	BjuVA03G47190				BjuVA03G62070
BjuVA02G00810		BjuVA08G09360	BjuVA05G35100				BjuVB06G57480
BjuVA05G36200		BjuVB01G37110	BjuVB03G27350				BjuVA10G24970
BjuVB05G27170		BjuVA01G09450	BjuVB05G40010				BjuVB08G54540
BjuVA05G09070		BjuVB08G22990	BjuVB06G57360				BjuVB04G47760
BjuVA06G17350		BjuVB05G53400	BjuVB03G12890				BjuVB08G41760
BjuVB01G42760		BjuVB02G43000	BjuVB03G12740				BjuVA03G36440
BjuVA08G04320		BjuVB02G08750	BjuVB02G25890				BjuVB08G00350
BjuVA08G07980		BjuVB04G43880	BjuVB01G30330				BjuVB08G26530
BjuVA01G25820		BjuVA02G00720	BjuVA08G20650				BjuVB05G19870
BjuVA09G49450		BjuVB04G27950	BjuVA10G04590				BjuVA08G22240
BjuVB05G17450		BjuVB05G12850	BjuVA04G30630				BjuVA05G43860
BjuVA02G28760		BjuVA07G40310	BjuVA05G04710				BjuVB02G25580
BjuVA03G29230		BjuVA01G02960	BjuVB02G59980				BjuVB03G57290
BjuVB04G04750		BjuVB03G11720	BjuVB01G34800				BjuVA03G31400
BjuVB01G21910		BjuVB01G12800	BjuVA09G39970				BjuVA07G45290
BjuVA03G11300		BjuVB07G20120	BjuVA07G00800				BjuVA06G02640
BjuVA09G18910		BjuVA07G40910	BjuVB05G27500				BjuVA03G64220
BjuVB02G16680		BjuVB05G01870	BjuVA09G19800				BjuVB02G70430
BjuVA10G21120		BjuVB02G43520	BjuVB02G29940				BjuVB08G20020
BjuVA09G47160		BjuVA06G28910	BjuVB03G43060				BjuVA04G17760
BjuVB04G12520		BjuVA03G63080	BjuVA08G25050				BjuVA02G05070
BjuVA06G17460		BjuVB08G55440	BjuVB06G14400				BjuVA06G16860
BjuVB05G20090		BjuVB02G69750	BjuVB04G52320				BjuVB08G01300
BjuVB02G44560		BjuVA05G13110	BjuVB02G06320				BjuVA01G16270
BjuVB07G25360		BjuVB01G30110	BjuVB02G71100				BjuVB02G21930
BjuVA09G65210		BjuVB07G31570	BjuVB06G44550				BjuVA08G17200
BjuVA08G30640		BjuV_Contig01041G00320	BjuVB07G19740				BjuVB02G22940
BjuVB03G29360		BjuVB03G38340	BjuVB07G08930				BjuVA06G30230
BjuVA09G07980		BjuVB08G46760	BjuVB07G04530				BjuVA09G23810
BjuVB06G39210		BjuVB06G06610	BjuVB04G24330				BjuVB02G76050
BjuVA08G31020		BjuVB08G10590	BjuVB01G17090				BjuVB07G23140
BjuVB01G37730		BjuVB04G03600	BjuVA10G02810				BjuVA01G37030
BjuVB08G06430		BjuVB04G16380	BjuVB04G05380				BjuVB04G04240
BjuVB05G09100		BjuVB03G17720	BjuVA01G02150				BjuVA02G07050
BjuV_Contig01019_ERROPOS2684367G00270		BjuVB03G11800	BjuVA06G43730				BjuVA08G20050
BjuVB06G19770		BjuVA08G20890	BjuVB08G56310				BjuVB01G12690
BjuVA10G09160		BjuVB06G52710	BjuVB05G04180				BjuVB04G40150
BjuVA09G51460		BjuVA02G03820	BjuVB07G11540				BjuVB02G66610
BjuVA06G48180		BjuVA03G47750	BjuVA03G08860				BjuVA03G40990
BjuVA10G02840		BjuVA03G04520	BjuV_Contig00907G00330				BjuVA01G41530
BjuV_Contig00485G00040		BjuVB01G46300	BjuVB02G75220				BjuVA07G38530
BjuVA03G13080		BjuVB05G24540	BjuVB03G18530				BjuVB07G09410
BjuVA01G00780		BjuVB03G34380	BjuVA10G04490				BjuVB08G49580
BjuVB01G18500		BjuVB08G51080	BjuVA07G22810				BjuVA09G27280
BjuVB07G36830		BjuVA04G00970	BjuVA07G38920				BjuVA03G30770
BjuVB08G06710		BjuVB06G51040	BjuVB01G47080				BjuVA02G23540
BjuVB03G11100		BjuVB05G01460	BjuVB01G39740				BjuVB08G31090
BjuVA10G26890		BjuVB01G48450	BjuVA09G17080				BjuVA07G22960
BjuVB03G34100		BjuVA05G17760	BjuVB02G02370				BjuVA06G39780
BjuVA03G44710		BjuVB06G01240	BjuVA03G39470				BjuVB02G64670
BjuVB08G13760		BjuVA07G23700	BjuVB02G13430				BjuVB04G37650
BjuVA06G37110		BjuVB03G19630	BjuVB05G16900				BjuVA01G16110
BjuVA02G19210		BjuVB01G04430	BjuVA03G00140				BjuVB03G34110
BjuVA05G10870		BjuVB07G46160	BjuVB04G22660				BjuVB07G25080
BjuVB08G11650		BjuVB08G25780	BjuVA10G24100				BjuVA08G06000
BjuVB05G19300		BjuVA09G57070	BjuVA03G32380				BjuVA05G43840
BjuVA04G27680		BjuVB08G17030	BjuVA07G43300				BjuVA09G18140
BjuVA03G17670		BjuVA03G56160	BjuVB02G43290				BjuVB08G54710
BjuVA09G35150		BjuVB03G19980	BjuVA02G33780				BjuVA09G03340
BjuVB07G11990		BjuVA03G61520	BjuVA04G03100				BjuVA09G47950
BjuVB07G12010		BjuVA02G05930	BjuVB03G28830				BjuVB06G54260
BjuVA06G47400		BjuVB08G23320	BjuVA07G27370				BjuVB04G18460
BjuVA03G19540		BjuVB05G34860	BjuVA08G24700				BjuVA07G39330
BjuVB03G40280		BjuVB01G23990	BjuVA09G48140				BjuVA07G39370
BjuVB02G56810		BjuVB03G47060	BjuVB01G17900				BjuVB05G11170
BjuVA03G58320		BjuVB03G08880	BjuVB03G05600				BjuVB03G50920
BjuVB02G12140		BjuVB08G49450	BjuVB08G05410				BjuVB06G35420
BjuVA04G19800		BjuVB03G04890	BjuVA10G21450				BjuVA09G57420
BjuVB07G34580		BjuVA03G23150	BjuVA02G46970				BjuVB06G48390
BjuVB03G14240		BjuVB02G61680	BjuVB06G12990				BjuVB06G12800
BjuVA04G25370		BjuVB01G06390	BjuVB02G44810				BjuVA05G34240
BjuVB04G28310		BjuVB02G46110	BjuVB08G39840				BjuVA04G30030
BjuVB03G46950		BjuVA05G43230	BjuVB08G05580				BjuVB05G00030
BjuVB06G49790		BjuVB08G06900	BjuVB03G04410				BjuVB03G07820
BjuVB01G31530		BjuVA08G29680	BjuVB06G11660				BjuVB03G15550
BjuVB03G12360		BjuVA03G27000	BjuVB08G31590				BjuVA09G37130
BjuVA08G20670		BjuVA09G39790	BjuVB07G13590				BjuVB01G40660
BjuVB04G27910		BjuVB02G65910	BjuVB08G32680				BjuVA02G17790
BjuVA04G08770		BjuVB04G32680	BjuVA03G41970				BjuVB04G48800
BjuVB05G32790		BjuVB06G38450	BjuVB04G07860				BjuVA07G21930
BjuV_Contig01033G00100		BjuVB04G04670	BjuV_Contig00969G00140				BjuVB03G14100
BjuVA01G37880		BjuVB03G28980	BjuVA07G01880				BjuVA02G41500
BjuVA06G06730		BjuVB06G51510	BjuVB08G48910				BjuVA01G02210
BjuVA06G42860		BjuVB04G05190	BjuVA01G02590				BjuVA03G02680
BjuVB06G44570		BjuVA10G31560	BjuVB01G12650				BjuVA07G09380
BjuVB06G13440		BjuVA10G15250	BjuVB07G05910				BjuVA03G16610
BjuVB03G03150		BjuVB06G54460	BjuVA09G51800				BjuVB06G32420
BjuVA03G08940		BjuVA09G22900	BjuVB03G01850				BjuVA06G12770
BjuVB03G24550		BjuVB03G23710	BjuVA02G04240				BjuVB01G37130
BjuVB07G05400		BjuVB04G19870	BjuVB02G74010				BjuVA03G41240
BjuVA01G42130		BjuVA01G19360	BjuVA03G47550				BjuVA09G19780
BjuVA09G23570		BjuVA01G19190	BjuVA01G23720				BjuVB06G54270
BjuVB05G41740		BjuVA01G06230	BjuVA06G17290				BjuVA09G62950
BjuVA03G58870		BjuVB03G18300	BjuVA09G56290				BjuVA05G18070
BjuVA01G10120		BjuVB08G46490	BjuVA05G12050				BjuVA07G40680
BjuVB06G46010		BjuVA01G22060	BjuVB05G11940				BjuVA05G03980
BjuVB03G23920		BjuVB03G43630	BjuVB01G00390				BjuVA08G21600
BjuVA02G15190		BjuVA03G62930	BjuVB04G19450				BjuVB04G35140
BjuVB05G18050		BjuVB03G11770	BjuVA04G19190				BjuVA08G22990
BjuVA06G01170		BjuVA04G23840	BjuVB04G04150				BjuVB02G63890
BjuVB05G31420		BjuVB06G00870	BjuVB04G05980				BjuVA04G33250
BjuVA05G18710		BjuVA10G19950	BjuVB08G28370				BjuVA07G33780
BjuVA04G05560		BjuVA06G33670	BjuVA10G23620				BjuVA03G43610
BjuVB08G19820		BjuVB04G35840	BjuVB03G19320				BjuVB04G29420
BjuVB04G37990		BjuVA09G18100	BjuVA08G34370				BjuVA08G16510
BjuVB07G18660		BjuVA02G26470	BjuVA02G18640				BjuVA09G01710
BjuVA09G19180		BjuVA05G32090	BjuVB05G04070				BjuVB06G15550
BjuVA06G36500		BjuVB06G07940	BjuVA07G23860				BjuVB02G69330
BjuVB01G06720		BjuVB04G04530	BjuVB08G01700				BjuVA03G34280
BjuVA10G22710		BjuVB08G33570	BjuVA10G33510				BjuVA06G09300
BjuVB03G07960		BjuVB06G21210	BjuVA10G07720				BjuVB07G33070
BjuVB03G17120		BjuVA05G32120	BjuVB06G39490				BjuVB03G13100
BjuVA05G06400		BjuVA03G16840	BjuVA01G14880				BjuVA01G31580
BjuVA09G53110		BjuVB05G49200	BjuVB02G38060				BjuVA03G16770
BjuVB07G16810		BjuVB02G60120	BjuVB06G16940				BjuVB05G22120
BjuVA02G25290		BjuVB02G40170	BjuVA07G14230				BjuVA01G01040
BjuVB07G11920		BjuVA06G35480	BjuVA09G65060				BjuVB08G39640
BjuVA02G28730		BjuVA03G39500	BjuVB08G20910				BjuVA06G33720
BjuVB02G35210		BjuVA08G10700	BjuV_Contig00265G00050				BjuVB02G74790
BjuVA09G52810		BjuVA08G36700	BjuVA09G64270				BjuVB07G01750
BjuVB06G16240		BjuVB03G00290	BjuVB01G04640				BjuVA09G50320
BjuVB05G39070		BjuVA08G30690	BjuVB05G28600				BjuVA04G30310
BjuVB05G40530		BjuVA02G41930	BjuVB03G19490				BjuVA07G26300
BjuVB02G56100		BjuVB01G45730	BjuVB06G00960				BjuVB07G12150
BjuVB08G14400		BjuVA05G16800	BjuVA03G34070				BjuVA03G05080
BjuVB08G03590		BjuVB07G49490	BjuVA05G29770				BjuVB07G46950
BjuVA04G04120		BjuVB06G48680	BjuVA02G28480				BjuVA07G11700
BjuVA03G14580		BjuVB05G17820	BjuVA01G02470				BjuVB06G21180
BjuVB03G00880		BjuVB05G13350	BjuVA03G53780				BjuVA01G09230
BjuVA01G08100		BjuVB05G10650	BjuVA06G04020				BjuV_Contig00855G00020
BjuVA10G22390		BjuV_Contig00683G00030	BjuVB03G12790				BjuVA03G16150
BjuVB02G25900		BjuVA03G21210	BjuVA03G33650				BjuVB08G15270
BjuVB08G16990		BjuVA04G26400	BjuVB01G13620				BjuVA06G10530
BjuVB07G17660		BjuVB03G03520	BjuVA03G28650				BjuVB03G01250
BjuVB06G24050		BjuVA10G01360	BjuVB04G23640				BjuVA03G11070
BjuVB01G41590		BjuVB05G10000	BjuVA03G47480				BjuVA05G32110
BjuVA09G52400		BjuVB02G74830	BjuVA03G24020				BjuVA09G05280
BjuVB02G64060		BjuVA10G23270	BjuVA02G26060				BjuVA02G18380
BjuVA04G04130		BjuVA09G11640	BjuVB04G03310				BjuVB03G11360
BjuVA03G40020		BjuVA03G35160	BjuVA02G42790				BjuVB08G52030
BjuVA05G26620		BjuVB01G45810	BjuVA09G53620				BjuVB08G39910
BjuVB06G39680		BjuVA04G06870	BjuVB04G47340				BjuVA09G05540
BjuVA05G01180		BjuVB02G67140	BjuVB03G23620				BjuVA04G12860
BjuVA08G13670		BjuVA09G68280	BjuVA05G20620				BjuVB06G13260
BjuVA06G34760		BjuVB03G58960	BjuVA10G27530				BjuVA01G08450
BjuVA06G00440		BjuVB06G54930	BjuVA04G21510				BjuVA10G25470
BjuVA02G20220		BjuVB07G01530	BjuVA01G44420				BjuVA08G18520
BjuVB05G02290		BjuVB08G25730	BjuVB01G14420				BjuVB03G08670
BjuVA03G11600		BjuVB04G02330	BjuVB02G73010				BjuVB06G06330
BjuVA10G32090		BjuVA07G36580	BjuVA08G28100				BjuVB03G44390
BjuVB06G13170		BjuV_Contig00578G00060	BjuVA08G10820				BjuVB08G11710
BjuVB01G44590		BjuVA03G02460	BjuVB08G14690				BjuVB02G67130
BjuVA02G26340		BjuVA03G59320	BjuVA03G06910				BjuVA04G00900
BjuVA09G47930		BjuVB02G51530	BjuVB04G10130				BjuVA09G24600
BjuVB03G13530		BjuVA03G56270	BjuVB08G18670				BjuVB01G12820
BjuVA09G58100		BjuVA01G15870	BjuVA05G24670				BjuVA08G15160
BjuVA02G11430		BjuVB04G29670	BjuVB03G53540				BjuVA03G20760
BjuVA10G24980		BjuVB01G08590	BjuVA07G26980				BjuVA09G46100
BjuVA07G39460		BjuVB05G05740	BjuVB03G40420				BjuVA09G26600
BjuVB02G70410		BjuVB02G36360	BjuVB05G49150				BjuVB05G44540
BjuVA03G20640		BjuVB03G47740	BjuVB07G28570				BjuVB06G19480
BjuVA01G07570		BjuVA08G17690	BjuVA09G55060				BjuVA05G00780
BjuVA03G34130		BjuVA04G07610	BjuVB02G47460				BjuVB01G14800
BjuVB02G45660		BjuVB08G21120	BjuVB05G26790				BjuVB02G33190
BjuVA06G04360		BjuVB01G37140	BjuVB04G00560				BjuVA09G07440
BjuVB05G58070		BjuVA05G02330	BjuVB08G13280				BjuVA02G04660
BjuVA04G31370		BjuVB01G47240	BjuVB08G09940				BjuVA08G34770
BjuVB07G08810		BjuVB07G30050	BjuVB03G18520				BjuVB05G06940
BjuVB04G08490		BjuVB02G60380	BjuVB05G16430				BjuVB01G45490
BjuVB03G17240		BjuVB06G02020	BjuVB06G37570				BjuVB06G37810
BjuVB04G53470		BjuVB07G19720	BjuVA06G00090				BjuVB08G55180
BjuVB06G46600		BjuVB06G57820	BjuVA05G26520				BjuVA03G51130
BjuVA01G33150		BjuVB02G06440	BjuVA02G20790				BjuVA07G16940
BjuVB02G49080		BjuVB04G30100	BjuVA02G45700				BjuVA10G12760
BjuVB04G08550		BjuVA01G00120	BjuVB02G29930				BjuVA01G21970
BjuVB05G18190		BjuVA08G28280	BjuVA08G20800				BjuVA07G13950
BjuVA01G32950		BjuVA09G39290	BjuVA09G15800				BjuVB05G04620
BjuVA09G16240		BjuVA01G27530	BjuV_Contig00518_ERROPOS3923562G00080				BjuVA05G26150
BjuVB08G22850		BjuVA07G04250	BjuVB08G32980				BjuVA02G00990
BjuVA08G03100		BjuVA06G11020	BjuVA04G29950				BjuVB05G13080
BjuVA08G12270		BjuVB02G46850	BjuVB06G04480				BjuVA06G09470
BjuVA04G06100		BjuVA09G43970	BjuVB08G58510				BjuVB07G26440
BjuVB02G36530		BjuVA07G12020	BjuVB03G45330				BjuVB03G02120
BjuVA06G44080		BjuVA01G16380	BjuVB06G57560				BjuVA02G16750
BjuVB05G35470		BjuVB02G32720	BjuVA03G26930				BjuVA09G66080
BjuVA03G42100		BjuVB08G08610	BjuVA09G08410				BjuVB01G42100
BjuVA05G37190		BjuVB05G30980	BjuVA09G11130				BjuVA01G19150
BjuVB06G11940		BjuVA10G06800	BjuVA06G04330				BjuVA08G02290
BjuVA01G15360		BjuVB06G45440	BjuVB04G22510				BjuVA04G16260
BjuVA03G24180		BjuVA09G32260	BjuVA04G04840				BjuVB06G07020
BjuVA03G37780		BjuVA02G38740	BjuVA01G03470				BjuVB01G04740
BjuVB03G13850		BjuVA03G37960	BjuVA06G42480				BjuVB04G25620
BjuVB03G06210		BjuVA06G20470	BjuVA09G57650				BjuVB05G00220
BjuVB02G54160		BjuVA09G05590	BjuVB01G30760				BjuVB05G05180
BjuVB07G12270		BjuVA03G18730	BjuVB04G53730				BjuVB06G13660
BjuVA08G00730		BjuVB05G28660	BjuVA03G55400				BjuVB03G11640
BjuVA03G08630		BjuVB02G64930	BjuVB08G14130				BjuVB04G34010
BjuVB08G05350		BjuVB03G08420	BjuVA02G38770				BjuVB04G14940
BjuVA10G20670		BjuVB03G39890	BjuVB06G53860				BjuVB06G13760
BjuVB08G36540		BjuVB04G48290	BjuVB06G36260				BjuVB04G12980
BjuVA06G05110		BjuVB06G52500	BjuVA02G03230				BjuVA05G33890
BjuVA07G23540		BjuVA03G68510	BjuVB07G19500
BjuVA05G32680		BjuVB07G27230	BjuVA09G20210
BjuVB01G01490		BjuVA10G15010	BjuV_Contig00694G00110
BjuVA09G03990		BjuVA08G27600	BjuVA03G40250
BjuVB08G31290		BjuVA07G20150	BjuVB04G04510
BjuVA03G64560		BjuVA02G10430	BjuVB06G04160
BjuVA09G26830		BjuVA07G39690	BjuVB04G34200
BjuVB02G68080		BjuVB03G17880	BjuVA10G05720
BjuVA05G09450		BjuVA03G07580	BjuVB08G40110
BjuVA03G53560		BjuVA03G63380	BjuVB05G35210
BjuVA08G24650		BjuVB06G12340	BjuVA10G21860
BjuVA01G00200		BjuVA07G42200	BjuVB07G18890
BjuVB08G53860		BjuVB05G51640	BjuVA06G01750
BjuVB07G43350		BjuVB02G32310	BjuVA06G05290
BjuVA03G02410		BjuVB07G08600	BjuVB06G07890
BjuVA01G22550		BjuV_Contig01043G00010	BjuVB06G48380
BjuVA09G33430		BjuVA01G39960	BjuVB05G50130
BjuVB01G44410		BjuVB01G39910	BjuVB02G68570
BjuV_Contig01022G00130		BjuVB06G10150	BjuVA04G07860
BjuVA08G11460		BjuVA03G22280	BjuVB01G30150
BjuV_Contig00854G00320		BjuVB08G00540	BjuVA01G06460
BjuVA01G01380		BjuVB08G24380	BjuVB05G60300
BjuVA03G32450		BjuVA03G45070	BjuVA03G05590
BjuVA05G11620		BjuVB04G46570	BjuVA09G23660
BjuVA06G32390		BjuVB06G17230	BjuVB03G08270
BjuVA06G46790		BjuVB02G74930	BjuVB07G01210
BjuVB01G36050		BjuVB06G37700	BjuV_Contig00909G00050
BjuVA02G27950		BjuVA05G12100	BjuVA03G53030
BjuVB01G37120		BjuV_Contig00909G00130	BjuVB02G20610
BjuVA09G45440		BjuVB04G37980	BjuVB01G47720
BjuVB03G23150		BjuVB07G49320	BjuVA05G34880
BjuVA09G12470		BjuVA10G13580	BjuVB04G36440
BjuVB08G13790		BjuVB02G50320	BjuVA01G27340
BjuVB04G19940		BjuVB01G15710	BjuVA09G19480
BjuVA10G28590		BjuVB01G31630	BjuVA01G16980
BjuVA10G26810		BjuVA09G12600	BjuVB02G00030
BjuVB03G02930		BjuVA06G44090	BjuVB03G13070
BjuVA10G01170		BjuVA07G15700	BjuVB06G48230
BjuVA01G33850		BjuVA09G36270	BjuVA09G37200
BjuVA09G67850		BjuVA03G03730	BjuVB03G05550
BjuVA10G29240		BjuVA10G06100	BjuVA05G13950
BjuVB04G37700		BjuVA09G61750	BjuVA06G05160
BjuVA09G57910		BjuVA10G04250	BjuVA02G42030
BjuVB02G57060		BjuVA04G08270	BjuVA03G09150
BjuVA09G58220		BjuVA07G24690	BjuVB08G05030
BjuVB08G54150		BjuVA09G56910	BjuVA08G20640
BjuVB04G25510		BjuVB05G52550	BjuVA06G10030
BjuVB04G05950		BjuVA02G04070	BjuVA03G14540
BjuVB07G09280		BjuVB06G07620	BjuVA05G01360
BjuVA03G00540		BjuVA03G39840	BjuVA02G37280
BjuVB03G11520		BjuVA01G36370	BjuVB05G17980
BjuVA06G27140		BjuVB04G26090	BjuVA08G28290
BjuVB06G58010		BjuVA03G23340	BjuVA09G46910
BjuVB02G05600		BjuVA08G08420	BjuVB06G19240
BjuVB07G29470		BjuVB08G52170	BjuVB02G35870
BjuVB02G34060		BjuVA01G05020	BjuV_Contig00909G00060
BjuVA09G48460		BjuVB02G06230	BjuVB08G19270
BjuVB02G27290		BjuVA10G32180	BjuVB02G41840
BjuVA09G55840		BjuVA05G32660	BjuVB04G32920
BjuVB07G13090		BjuVB04G00090	BjuVA09G16430
BjuVA01G06950		BjuVA03G35790	BjuVB04G03320
BjuVB02G47440		BjuVB05G07880	BjuVA03G24160
BjuVA03G44140		BjuVB02G22200	BjuVA04G29220
BjuVA03G49580		BjuVB08G15410	BjuVA09G26870
BjuVB08G55220		BjuVA05G03130	BjuVA09G00120
BjuVA04G34340		BjuVB07G01400	BjuVB01G05150
BjuVB04G32600		BjuVB06G52670	BjuVB03G24360
BjuVB02G67810		BjuVB04G29370	BjuVA02G47850
BjuVB06G15650		BjuV_Contig01058_ERROPOS2600000G00060	BjuVA02G26490
BjuVB01G29060		BjuVA02G17560	BjuVB04G06480
BjuVA05G44730		BjuVA07G28570	BjuVB03G06070
BjuVB02G68020		BjuVB04G09060	BjuVA03G16670
BjuVA10G28200		BjuVB03G43440	BjuVA08G34860
BjuVB03G58310		BjuVB01G42860	BjuVB07G29100
BjuVB05G52320		BjuVB08G18690	BjuVA09G58630
BjuVB05G02030		BjuVA06G33950	BjuVA03G64240
BjuVA03G19040		BjuVB07G34990	BjuVB04G42150
BjuVB05G20980		BjuVA03G47080	BjuVB02G39150
BjuVB02G24520		BjuVA10G31600	BjuVB02G63900
BjuVA09G38450		BjuVA03G12430	BjuVB07G29340
BjuVB02G54370		BjuVA07G13900	BjuVB03G12840
BjuVB07G47130		BjuVA09G51060	BjuVB08G23500
BjuVB08G29100		BjuVA01G11650	BjuVA10G34050
BjuVB07G04060		BjuVB08G40120	BjuVB08G28500
BjuVB07G19340		BjuVA03G64070	BjuVB06G46020
BjuVB07G09650		BjuVA03G21260	BjuVB02G65460
BjuVB05G10090		BjuVB01G46520	BjuVB08G35910
BjuVA04G04550		BjuVA06G45880	BjuVA04G32830
BjuVA05G34090		BjuVA08G33240	BjuVB08G33860
BjuVA03G33110		BjuVA05G33580	BjuVB02G31200
BjuVA10G18730		BjuVA07G37540	BjuVA01G32900
BjuVA03G08400		BjuVA05G30640	BjuVB01G12700
BjuVB07G24640		BjuVA05G04520	BjuVB02G51860
BjuVA09G65320		BjuVB05G31340	BjuVA06G30530
BjuVB08G24300		BjuVA01G11440	BjuVB04G11490
BjuVB06G54290		BjuVA07G18340	BjuVB07G04830
BjuVA01G08670		BjuVA07G15550	BjuVA07G25200
BjuVA09G50270		BjuVA05G13100	BjuVA03G58860
BjuVB03G18970		BjuVB04G38580	BjuVB06G08650
BjuVA05G18400		BjuVA05G26560	BjuVB04G50930
BjuVA10G13260		BjuVA02G12070	BjuVB06G37430
BjuVB06G10720		BjuVB03G07990	BjuVB02G61330
BjuVB01G46540		BjuVB06G01280	BjuVB02G61030
BjuVA03G18770		BjuVA06G36940	BjuVB03G47000
BjuVB01G31850		BjuVA08G21760	BjuVA04G04500
BjuVB07G48840		BjuVB03G10820	BjuVB08G56530
		BjuVA05G09270	BjuVB03G43320
		BjuVA03G12520	BjuVB07G31580
		BjuVB08G05010	BjuVB02G55460
		BjuVB01G02120	BjuVA05G04480
		BjuVB04G07800	BjuVA09G40960
		BjuVB01G40490	BjuVA05G02440
		BjuVB07G15150	BjuVB06G19970
		BjuVA06G45220	BjuVB07G10850
		BjuVA08G33270	BjuVA10G33130
		BjuVB01G44890	BjuV_Contig00645G00070
		BjuVA01G14110	BjuVA05G41230
		BjuVB03G13630	BjuVA02G30730
		BjuVB08G34490	BjuV_Contig00947G00040
		BjuVB05G17780	BjuVB03G09740
		BjuVA07G13130	BjuVB05G53590
		BjuVA09G66890	BjuVA10G31020
		BjuVA05G42750	BjuVA07G14590
		BjuVA06G20240	BjuVB04G23660
		BjuVA05G41370	BjuVB07G05550
		BjuVB06G22000	BjuVB08G11190
		BjuVA09G09050	BjuVA10G28040
		BjuVA05G34030	BjuVB02G33500
		BjuVA04G24430	BjuVA03G51850
		BjuVA09G50860	BjuVA09G19220
		BjuV_Contig00859G00140	BjuVA07G32420
		BjuVB08G29890	BjuVB08G40170
		BjuVB03G33240	BjuVB05G50040
		BjuVB04G18360	BjuVA09G07180
		BjuVB05G55510	BjuVA03G47610
		BjuVA03G54940	BjuVA05G15290
		BjuVA10G33430	BjuVB05G55000
		BjuVB02G14290	BjuVA06G38130
		BjuVA06G11520	BjuVB07G47580
		BjuVB02G75120	BjuVA09G11160
		BjuVA02G27900	BjuVB04G25140
		BjuVB03G22470	BjuVA05G00760
		BjuVA09G52100	BjuVA07G31590
		BjuVA08G14250	BjuVA04G14250
		BjuVB05G18140	BjuVB08G57250
		BjuVB06G42870	BjuVA05G38980
		BjuVB07G29170	BjuVA07G15930
		BjuVB03G37840	BjuVB08G12500
		BjuVB08G43360	BjuVA03G03800
		BjuVB06G57550	BjuVA06G31900
		BjuVB07G16680	BjuVB08G53910
		BjuVA07G28300	BjuVA04G24630
		BjuVB03G07800	BjuVA09G39660
		BjuVA05G38630	BjuVA03G08790
		BjuVB02G56840	BjuVA07G36490
		BjuVA09G61100	BjuVB01G12860
		BjuVA06G05350	BjuVB05G26810
		BjuVB04G06790	BjuVB08G17640
		BjuVA10G13860	BjuVB08G25950
		BjuVB05G19830	BjuVA07G06370
		BjuVA01G03950	BjuVB01G31500
		BjuVA09G33810	BjuVB02G74720
		BjuVB02G52430	BjuVB05G20970
		BjuVA07G22090	BjuVA05G05420
		BjuVA10G33530	BjuVA05G04450
		BjuVB04G08940	BjuVA03G53270
		BjuVA01G16280	BjuVA09G65070
		BjuVB01G34670	BjuVB08G55190
		BjuVB03G29570	BjuVA10G00660
		BjuVA08G30360	BjuVB04G50500
		BjuVB05G53520	BjuVA07G40890
		BjuVA10G31570	BjuVB04G31040
		BjuVB08G54240	BjuVB08G44440
		BjuVB06G09370	BjuVA02G43220
		BjuVA09G54500	BjuVA03G02940
		BjuVA08G28070	BjuVB06G57470
		BjuVB04G14000	BjuVA07G13670
		BjuVA07G31800	BjuVA03G25820
		BjuVB07G48670	BjuVB04G51110
		BjuVB02G73890	BjuVB03G15940
		BjuVB05G32950	BjuVB06G50360
		BjuVB03G40430	BjuVB01G39320
		BjuVB08G27860	BjuVB03G29000
		BjuVA05G06690	BjuVB02G44590
		BjuVB03G08640	BjuVA10G26220
		BjuVA03G00830	BjuVB03G50700
		BjuVB08G20200	BjuVB04G18350
		BjuVA06G39990	BjuVB06G33930
		BjuV_Contig00303G00300	BjuVB04G29060
		BjuVA08G16310	BjuVB04G33960
		BjuVB02G67470	BjuVA05G14940
		BjuVA07G32390	BjuVB05G12790
		BjuVB08G44190	BjuVB04G25880
		BjuVA03G23260	BjuVA03G20490
		BjuVA03G13580	BjuVB08G15730
		BjuVA05G19440	BjuVA10G04500
		BjuVB05G57140	BjuVA02G27140
		BjuVB06G10430	BjuVA08G35270
		BjuVA09G66950	BjuVB03G21290
		BjuVB01G14770	BjuVB08G58340
		BjuVB01G16310	BjuVB03G26500
		BjuVA07G23460	BjuVA07G44150
		BjuVB03G36850	BjuVB02G41890
		BjuVB02G05120	BjuVA06G42320
		BjuVB04G02540	BjuVB03G28090
		BjuVA06G40210	BjuVB03G49760
		BjuVB08G55260	BjuVA01G11130
		BjuVB03G45760	BjuVA02G44260
		BjuVB08G09690	BjuVB06G21300
		BjuVB04G11050	BjuVB02G42790
		BjuVA08G34780	BjuVA06G42270
		BjuVB06G50090	BjuVB06G03470
		BjuVB07G11350	BjuVA02G48490
		BjuVB07G34490	BjuVA03G33670
		BjuVA09G13310	BjuVB04G12680
		BjuVA05G43560	BjuV_Contig00969G00170
		BjuVB06G05430	BjuVA06G10730
		BjuVB02G11150	BjuVA09G41600
		BjuVA08G13870	BjuVB02G74690
		BjuVA04G02360	BjuVA01G17030
		BjuVA04G21450	BjuVA06G20640
		BjuVA07G28590	BjuVA01G23390
		BjuVB03G50740	BjuVB05G03180
		BjuVA03G40770	BjuVA09G63770
		BjuVB03G22300	BjuVB04G15000
		BjuVB05G21880	BjuVA10G05120
		BjuVB03G31320	BjuVA06G17300
		BjuVA02G11940	BjuVB02G09030
		BjuVA06G30680	BjuVB02G40510
		BjuVB07G17140	BjuVA09G46180
		BjuVB05G57750	BjuVA03G37320
		BjuVA10G33490	BjuVA09G14200
		BjuVA08G38240	BjuVB04G35200
		BjuVB05G01830	BjuVA09G09010
		BjuVA06G34680	BjuVA05G26210
		BjuVB08G05590	BjuVA05G02430
		BjuVB01G38100	BjuVB04G40060
		BjuVB06G36490	BjuVB05G50660
		BjuVB07G25070	BjuVA05G30670
		BjuVB04G33490	BjuVB04G28730
		BjuVB08G13660	BjuVB02G65200
		BjuVB05G12580	BjuVA06G37280
		BjuVB04G39980	BjuVB07G19490
		BjuVB07G16500	BjuVA03G56380
		BjuVA09G14170	BjuVB03G05140
		BjuVB02G64100	BjuVB02G07500
		BjuVA03G39000	BjuVB07G13310
		BjuVA07G00260	BjuVB06G39710
		BjuVB08G03610	BjuV_Contig00477G00030
		BjuVA04G32530	BjuVB06G09250
		BjuVB07G17590	BjuVA06G20510
		BjuVB07G47760	BjuVB04G12160
		BjuVA07G20880	BjuVB01G14080
		BjuVA05G40940	BjuVB08G55070
		BjuVA01G40370	BjuVA09G48590
		BjuVB08G17440	BjuVA10G00780
		BjuV_Contig00830G00190	BjuVB05G16000
		BjuVB02G34990	BjuVA09G19210
		BjuVA09G49330	BjuVA02G45730
		BjuVA03G25160	BjuVA03G39460
		BjuVB04G25410	BjuVB05G13880
		BjuVA08G02220	BjuVA09G66200
		BjuVA07G43410	BjuVA06G03830
		BjuVA09G65260	BjuVA06G04140
		BjuVA02G22730	BjuVB02G23750
		BjuVB08G13670	BjuVA10G15470
		BjuVA03G08610	BjuVA02G06580
		BjuVA08G28150	BjuVB04G45350
		BjuVB02G39710	BjuVB08G06020
		BjuVA02G00060	BjuVB08G53670
		BjuVB07G21440	BjuVA04G27230
		BjuVB06G05340	BjuVB08G13390
		BjuVB06G56220	BjuVB08G48300
		BjuVA02G28870	BjuVA10G13410
		BjuVA05G42840	BjuVA10G02190
		BjuVA07G06790	BjuVA07G45230
		BjuVB01G06950	BjuVA01G13300
		BjuVB06G37790	BjuVB03G36040
		BjuVA08G32290	BjuVA09G10280
		BjuVA08G27030	BjuVA06G16850
		BjuVB08G23510	BjuVB07G06510
		BjuVA05G09870	BjuVB06G02130
		BjuVB04G06170	BjuVA08G29080
		BjuVB05G02610	BjuVB04G08370
		BjuVB05G18890	BjuVA10G23830
		BjuVB02G45130	BjuVB05G46380
		BjuVB04G09890	BjuVA04G33740
		BjuVA06G08100	BjuV_Contig00654_ERROPOS300000G01210
		BjuVB08G01430	BjuVA05G38430
		BjuVA07G08560	BjuVA01G11920
		BjuVA05G06620	BjuVA04G17040
		BjuVA09G52700	BjuVA03G59040
		BjuVA09G11210	BjuVA03G06510
		BjuVA10G12340	BjuVB03G49880
		BjuVB08G13820	BjuVA10G13990
		BjuVB04G17220	BjuVB08G36410
		BjuVA01G37150	BjuVB01G12140
		BjuVA01G25620	BjuVB07G08260
		BjuVA05G33390	BjuVB02G33620
		BjuVA04G05950	BjuVB05G06790
		BjuVB07G10650	BjuVA08G18430
		BjuVA02G20390	BjuVB04G27930
		BjuVA01G00100	BjuVA03G05710
		BjuVB03G31220	BjuVA09G07220
		BjuVA05G09500	BjuVB08G20380
		BjuVB06G30960	BjuVA06G15340
		BjuVB07G27270	BjuVA09G05790
		BjuVA04G05990	BjuVB02G57330
		BjuVB02G60570	BjuVA06G18590
		BjuVB06G57870	BjuVB02G23550
		BjuVB06G09180	BjuVA03G03610
		BjuVB02G05050	BjuVA02G27090
		BjuVA03G46890	BjuVA07G18640
		BjuVA02G02680	BjuVA04G12710
		BjuVB05G42160	BjuVA02G04650
		BjuVA10G32270	BjuV_Contig00937G00060
		BjuVA01G36800	BjuVA08G29850
		BjuVB03G33510	BjuVB05G25290
		BjuVA03G49200	BjuVA01G11420
		BjuVA07G42980	BjuVB04G21980
		BjuVA08G30140	BjuVA02G04740
		BjuVB07G05120	BjuVA09G64740
		BjuVB01G48140	BjuVB01G43760
		BjuVB02G04650	BjuVA07G44780
		BjuVB04G23740	BjuVA10G28460
		BjuVB05G28970	BjuVA10G19760
		BjuVB05G02690	BjuVA09G57260
		BjuVB08G44160	BjuVA01G14860
		BjuVB07G11850	BjuVA07G13150
		BjuVB01G36410	BjuV_Contig00477G00020
		BjuVA08G11020	BjuVB04G22300
		BjuVB01G01730	BjuVB03G31010
		BjuVB04G07440	BjuVB08G02930
		BjuVB02G21910	BjuVA09G60800
		BjuVB04G05970	BjuVA01G10360
		BjuVA09G12610	BjuVA10G17060
		BjuVA03G39030	BjuVA10G21790
		BjuVA04G17620	BjuVA09G37230
		BjuVA01G37940	BjuVB03G04530
		BjuVB05G23620	BjuVA01G34290
		BjuVB06G42780	BjuVB03G44910
		BjuVA06G17750	BjuVA05G01510
		BjuVB04G30150	BjuVB08G47190
		BjuV_Contig00478G00070	BjuVB02G62350
		BjuVB01G01230	BjuVB01G40170
		BjuVB01G43850	BjuVB03G43330
		BjuVB03G43000	BjuVB07G29610
		BjuVA03G17220	BjuVB06G53920
		BjuVB02G13990	BjuVA01G17310
		BjuVB07G30790	BjuVB01G37860
		BjuVB01G39140	BjuVA05G06270
		BjuVA02G18620	BjuV_Contig00453G00080
		BjuVA03G34910	BjuVB01G12180
		BjuVA05G10880	BjuVB03G16490
		BjuVA02G06360	BjuVA09G22460
		BjuVB03G28590	BjuVB03G42450
		BjuVA01G13110	BjuVB01G34500
		BjuV_Contig00458G00040	BjuVA07G14850
		BjuVB07G16690	BjuV_Contig01019_ERROPOS2684367G00290
		BjuVA08G30880	BjuVA09G56060
		BjuVA06G37920	BjuVA05G38840
		BjuVB03G05530	BjuVA08G16630
		BjuVB03G08470	BjuVB02G55150
		BjuVA01G37070	BjuVB04G22180
		BjuVA03G54160	BjuVA03G06920
		BjuVA01G02250	BjuVA05G43140
		BjuVA07G14400	BjuVA09G41100
		BjuVB06G13210	BjuVB08G56340
		BjuVA02G22130	BjuVB01G02240
		BjuVA01G05200	BjuVA06G45990
		BjuVB02G03080	BjuVB08G27310
		BjuVA09G47790	BjuVB04G16720
		BjuVA03G50480	BjuVA05G09770
		BjuVA09G45140	BjuVB07G10430
		BjuVB05G09860	BjuVA03G32540
		BjuVA03G14510	BjuV_Contig00477G00040
		BjuVB06G19320	BjuVA01G17350
		BjuVA08G30680	BjuVA02G34330
		BjuVB07G47440
		BjuVB03G55700
		BjuVA05G24230
		BjuVA08G14660
		BjuVA03G39910
		BjuVA01G02880
		BjuVA05G05620
		BjuVB07G42700
		BjuVA01G16500
		BjuVB06G10440
		BjuVB05G04970
		BjuVB02G48040
		BjuVA06G45810
		BjuVB07G31600
		BjuVA09G59430
		BjuVB04G39510
		BjuVA03G25070
		BjuVA06G21900
		BjuVA08G22800
		BjuVA07G27750
		BjuV_Contig00830G00100
		BjuVB02G54570
		BjuVB03G48120
		BjuVB02G55650
		BjuVA07G28980
		BjuVA05G30870
		BjuVA02G40180
		BjuVB07G14560
		BjuVA01G19160
		BjuVB06G32130
		BjuVA09G41010
		BjuVB05G06500
		BjuVB03G13960
		BjuVA06G33480
		BjuVA09G40210
		BjuVA06G19000
		BjuVB04G35050
		BjuVA07G15540
		BjuVA06G40790
		BjuVB03G46390
		BjuVA10G21630
		BjuVB04G46940
		BjuVB08G37240
		BjuVA03G26120
		BjuVA09G43020
		BjuVA01G25440
		BjuVA07G42830
		BjuVA07G15370
		BjuV_Contig00748G00070
		BjuVA04G02380
		BjuVB03G15700
		BjuVB08G02250
		BjuVA03G07700
		BjuVB02G26690
		BjuVB04G01340
		BjuVA04G05980
		BjuVA01G17970
		BjuVB05G01630
		BjuVB01G11710
		BjuVB08G24900
		BjuVB02G71090
		BjuVA06G45790
		BjuVB03G22820
		BjuVB01G37710
		BjuVB05G04500
		BjuVA09G55870
		BjuVB06G42070
		BjuVA10G21590
		BjuVA08G27880
		BjuVA06G39880
		BjuVA02G01800
		BjuVB02G14830
		BjuVB06G07230
		BjuVA10G00630
		BjuVA09G05270
		BjuVB06G47000
		BjuVA05G34900
		BjuVB06G12680
		BjuVB08G21810
		BjuVB03G15360
		BjuVB08G07560
		BjuVB08G53610
		BjuVB08G06690
		BjuVA03G28450
		BjuVB04G08040
		BjuVA10G16350
		BjuVA09G21570
		BjuVB01G45650
		BjuVB01G47440
		BjuVB08G57140
		BjuVA10G16040
		BjuVA07G38370
		BjuVA03G32290
		BjuVA03G05040
		BjuVA10G12060
		BjuVA02G41320
		BjuVB04G02070
		BjuVA03G02810
		BjuVA10G11040
		BjuVB07G04000
		BjuVB05G15880
		BjuVB02G26680
		BjuV_Contig00272G00140
		BjuVA07G03850
		BjuVA02G35760
		BjuVA08G37080
		BjuVA04G30650
		BjuVB02G07850
		BjuVA05G34100
		BjuVA01G39900
		BjuVA01G34090
		BjuVB05G57040
		BjuVA04G00690
		BjuVB02G25840
		BjuVA09G38020
		BjuVA09G29010
		BjuVA05G11360
		BjuVA05G11280
		BjuV_Contig00509_ERROPOS1372816G00020
		BjuVB06G29680
		BjuVA10G12390
		BjuVA03G39080
		BjuVA03G54460
		BjuVA06G42870
		BjuVB03G28410
		BjuVB04G26270
		BjuVA02G20310
		BjuVA02G02510
		BjuVA09G01340
		BjuVB07G49960
		BjuVB02G29590
		BjuVB06G54240
		BjuVB03G40860
		BjuVA06G09460
		BjuVA07G33170
		BjuVA09G41640
		BjuVB07G04270
		BjuVB03G39050
		BjuVB03G20440
		BjuVB04G10050
		BjuVB04G48560
		BjuVA09G52540
		BjuVB06G11680
		BjuVB02G56900
		BjuVB04G33090
		BjuVB06G03920
		BjuVB02G66030
		BjuVB05G02440
		BjuVB06G17440
		BjuVB04G34800
		BjuVB06G32600
		BjuVB02G32240
		BjuVA09G42390
		BjuVA03G62960
		BjuVB05G53570
		BjuVB08G03580
		BjuVA07G09440
		BjuVB01G13360
		BjuVB03G29880
		BjuVA09G03980
		BjuVA09G01450
		BjuVB03G20070
		BjuVB03G07770
		BjuVA03G19680
		BjuVB06G52290
		BjuVB01G27830
		BjuVB07G07250
		BjuVA03G04740
		BjuVB08G34200
		BjuVB02G57710
		BjuVA07G14490
		BjuVB07G19370
		BjuVB05G08540
		BjuVA03G28710
		BjuVA03G36850
		BjuVA09G48110
		BjuVA07G15150
		BjuVB01G46150
		BjuV_Contig00909G00010
		BjuVA03G64340
		BjuVB08G20030
		BjuVA02G42400
		BjuVA05G00310
		BjuVA10G05760
		BjuVB06G08970
		BjuVB05G12310
		BjuVA03G63400
		BjuVA07G01090
		BjuVB03G22070
		BjuVA09G11450
		BjuVA01G08980
		BjuVB03G17300
		BjuVB06G58330
		BjuVA01G42070
		BjuVB07G08330
		BjuVB02G73870
		BjuVA02G05790
		BjuVB05G23640
		BjuVA06G00960
		BjuVA01G12570
		BjuVA08G17350
		BjuVA03G29990
		BjuVA05G26580
		BjuVA01G10610
		BjuVA07G06660
		BjuVB05G01150
		BjuVB02G26800
		BjuVB04G29960
		BjuVB08G44690
		BjuVA03G19310
		BjuVB05G53270
		BjuVB06G13450
		BjuVB04G23600
		BjuVA07G41610
		BjuVA06G12200
		BjuVB03G50210
		BjuVA09G69060
		BjuV_Contig00303G00220
		BjuVB08G00780
		BjuVA09G52690
		BjuVB02G58950
		BjuVB01G03380
		BjuVB04G22940
		BjuVB03G13760
		BjuVB03G18880
		BjuVB02G54780
		BjuVB04G01310
		BjuVA09G10790
		BjuVB06G51450
		BjuVB06G41040
		BjuVA03G38400
		BjuVB03G18120
		BjuVA05G25280
		BjuVA09G41130
		BjuVB04G38260
		BjuVB02G49690
		BjuVA09G59210
		BjuVB03G57920
		BjuVB02G52940
		BjuVB01G11080
		BjuVB04G06950
		BjuVB06G37710
		BjuVB05G44740
		BjuVA03G21480
		BjuVB07G02590
		BjuVA09G65670
		BjuVA07G08940
		BjuVA05G04600
		BjuVA02G46210
		BjuVB04G19330
		BjuVB08G50620
		BjuVA06G38840
		BjuVB06G41970
		BjuVA03G14400
		BjuVB03G08090
		BjuVB03G34240
		BjuVB02G65980
		BjuVA09G03810
		BjuVA08G01450
		BjuVA02G46480
		BjuVB02G74330
		BjuVA05G29010
		BjuVB06G55900
		BjuVA09G62330
		BjuVB05G34630
		BjuVA07G25170
		BjuVA03G02030
		BjuVA07G21950
		BjuVB03G16090
		BjuVA02G30990
		BjuVB06G33470
		BjuVB05G01880
		BjuVA01G39230
		BjuVA10G31460
		BjuVB06G11460
		BjuVA05G20380
		BjuVB06G16500
		BjuVA02G40310
		BjuVA08G13740
		BjuVB03G00300
		BjuVA03G62640
		BjuVA03G33340
		BjuVB05G36480
		BjuVB07G20490
		BjuVA08G21580
		BjuVB07G43970
		BjuVB06G41960
		BjuVA06G35510
		BjuVB06G37760
		BjuVA04G21650
		BjuVB06G08660
		BjuVA09G02600
		BjuVB02G60620
		BjuVB06G16080
		BjuVA02G20370
		BjuVA04G01390
		BjuVA07G20380
		BjuVA07G32470
		BjuVB02G10560
		BjuVB08G54090
		BjuVB05G28830
		BjuVA03G35050
		BjuVB04G32670
		BjuVA08G16300
		BjuVA02G46420
		BjuVA09G59270
		BjuVB05G29960
		BjuVB03G10460
		BjuVB03G47710
		BjuVA05G17600
		BjuVA02G10270
		BjuVA09G41940
		BjuVB03G46770
		BjuVB07G34500
		BjuVB04G49000
		BjuVB03G03440
		BjuVA06G27800
		BjuVA06G31110
		BjuVB05G48650
		BjuVA08G06800
		BjuVB01G34940
		BjuVB02G44100
		BjuVB04G46630
		BjuVB05G00730
		BjuVA09G25370
		BjuVB08G32500
		BjuVB06G06880
		BjuVA07G16230
		BjuVB03G24080
		BjuVB05G09340
		BjuVB02G31390
		BjuVB07G43610
		BjuVB06G41950
		BjuVA09G55780
		BjuVB07G22400
		BjuVA06G39580
		BjuVA04G27540
		BjuVA01G33820
		BjuVA05G28720
		BjuVB03G26190
		BjuVB04G31630
		BjuVA09G11010
		BjuVB02G54520
		BjuVA03G58700
		BjuVA01G01570
		BjuV_Contig00453G00120
		BjuVA05G22260
		BjuVA05G34550
		BjuVB07G23530
		BjuVA09G54690
		BjuVA09G50000
		BjuVA09G58990
		BjuVB01G12120
		BjuVA10G21730
		BjuVA08G28120
		BjuVA09G60240
		BjuVA05G37160
		BjuVB02G73130
		BjuVB07G35660
		BjuVB05G32480
		BjuVB04G30920
		BjuVA01G21540
		BjuVA03G08360
		BjuVB03G47460
		BjuVA10G34180
		BjuVB01G45280
		BjuVB04G00780
		BjuVA03G07420
		BjuVB08G53700
		BjuVA02G06320
		BjuVA01G01330
		BjuVA01G05310
		BjuVB02G08700
		BjuVA03G02820
		BjuVB04G12220
		BjuVB05G08350
		BjuVB05G29510
		BjuVB01G43810
		BjuVA03G39150
		BjuVA02G42470
		BjuVA10G03350
		BjuVA05G42540
		BjuVB01G41600
		BjuVA09G63550
		BjuVA09G48290
		BjuVA03G55840
		BjuVA08G26080
		BjuVA04G11470
		BjuVB07G32140
		BjuVA08G01120
		BjuVA02G09090
		BjuVA09G23610
		BjuVB05G07700
		BjuVA09G61430
		BjuVB02G42870
		BjuVA05G05560
		BjuVA03G05830
		BjuVB02G74210
		BjuVB05G24040
		BjuVB08G35180
		BjuVB04G43190
		BjuVB01G46530
		BjuVA06G03130
		BjuVA01G31410
		BjuVA10G11280
		BjuVA07G02450
		BjuVB02G70250
		BjuVB03G33980
		BjuVA06G34270
		BjuVB03G08740
		BjuVB04G38540
		BjuVA08G17160
		BjuVB08G49570
		BjuVA08G23240
		BjuVA08G15330
		BjuVB03G05710
		BjuVB07G19380
		BjuVA09G61090
		BjuVA06G00480
		BjuVA04G16850
		BjuVB05G25220
		BjuV_Contig00715G00020
		BjuVA06G07770
		BjuVA02G27190
		BjuVA06G43000
		BjuVA01G43180
		BjuVA04G00520
		BjuVB06G54080
		BjuVA04G22950
		BjuVB02G48070
		BjuVB06G02490
		BjuVA02G36890
		BjuVB04G06120
		BjuVA01G44000
		BjuVA08G03760
		BjuVA01G01390
		BjuVB01G06560
		BjuVB04G16110
		BjuVA04G27730
		BjuVA01G43050
		BjuVA07G42180
		BjuVA05G24780
		BjuVB06G14610
		BjuVA08G25800
		BjuVA04G26550
		BjuVA01G12130
		BjuVA09G66050
		BjuVB06G44460
		BjuVB05G59240
		BjuVA09G05560
		BjuVA07G15610
		BjuVB03G11790
		BjuVB03G39940
		BjuVB06G37680
		BjuV_Contig00017G00090
		BjuVA01G35030
		BjuVA09G64610
		BjuVB06G00540
		BjuVB06G34500
		BjuVA05G17950
		BjuVB07G29120
		BjuVB06G53680
		BjuVA09G28600
		BjuVA04G33870
		BjuVB06G16700
		BjuVA10G29530
		BjuVB06G13200
		BjuVB05G16870
		BjuVA06G15320
		BjuVA02G19490
		BjuVB06G32670
		BjuV_Contig00925G00240
		BjuVB05G47830
		BjuVA05G09580
		BjuVB07G02730
		BjuVB02G23280
		BjuVA07G31920
		BjuVB03G11310
		BjuVB01G07600
		BjuVB01G38360
		BjuVB04G13970
		BjuVA08G35350
		BjuVA07G37120
		BjuVA03G42450
		BjuVB03G47780
		BjuVB04G30550
		BjuVA08G33320
		BjuVB02G69960
		BjuVA03G57770
		BjuVB05G17890
		BjuVA03G64690
		BjuVA01G18070
		BjuVB07G49830
		BjuVB02G26580
		BjuVB03G42530
		BjuVA09G68660
		BjuVB02G18060
		BjuVB04G27320
		BjuVB08G15460
		BjuVB04G36450
		BjuVB03G40890
		BjuVA06G36740
		BjuV_Contig00934G00030
		BjuVB02G28900
		BjuVB07G27650
		BjuVB04G13730
		BjuVA07G28410
		BjuVB04G42820
		BjuVB02G18000
		BjuVA09G03150
		BjuVA10G15390
		BjuVA10G11180
		BjuVA05G44920
		BjuVB05G60000
		BjuVA10G00260
		BjuVA04G31520
		BjuVB04G07990
		BjuVB07G29690
		BjuVB02G37200
		BjuVA06G06410
		BjuVB02G73970
		BjuVA10G02090
		BjuVA03G09800
		BjuVB05G29570
		BjuVB01G37280

## Sheet: down
Table S4. Venn showing the number of specific and shared down-regulated DEGs between the four time points.
985 elements included exclusively in "1h/CK":	61 elements included exclusively in "24h/CK":	1204 elements included exclusively in "48h/CK":	781 elements included exclusively in "72h/CK":	10 common elements in "1h/CK", "24h/CK", "48h/CK" and "72h/CK":	5 common elements in "1h/CK" and "24h/CK":	37 common elements in "24h/CK" and "48h/CK":	677 common elements in "48h/CK" and "72h/CK":	4 common elements in "1h/CK", "24h/CK" and "48h/CK":	279 common elements in "24h/CK", "48h/CK" and "72h/CK":	53 common elements in "1h/CK" and "48h/CK":	104 common elements in "24h/CK" and "72h/CK":	21 common elements in "1h/CK", "48h/CK" and "72h/CK":	2 common elements in "1h/CK", "24h/CK" and "72h/CK":	228 common elements in "1h/CK" and "72h/CK":
BjuVB06G16490	BjuVB03G46000	BjuV_Contig00466G00250	BjuVA05G30110	BjuVB02G74550	BjuVA01G05290	BjuV_Contig00787G00010	BjuVA05G15780	BjuVA07G30030	BjuVA01G00780	BjuVA03G44670	BjuVB02G22890	BjuVB06G01150	BjuVA03G32600	BjuVB04G11450
BjuVB04G19870	BjuVA10G21120	BjuVA06G11150	BjuVB04G27260	BjuVA01G39270	BjuVB05G05040	BjuVA07G08200	BjuVB02G60440	BjuVB07G16240	BjuVB05G00560	BjuVB04G34310	BjuVA02G48600	BjuVB06G32930	BjuVA09G32800	BjuVB04G15310
BjuVB06G34180	BjuVA03G65630	BjuVB07G08310	BjuVA02G02470	BjuVA09G11800	BjuVA03G12990	BjuVB07G03750	BjuVB02G36620	BjuVB03G34980	BjuVA08G21090	BjuVA10G02710	BjuVB04G01010	BjuVB06G13320		BjuVA02G34620
BjuVA05G44670	BjuVA01G34770	BjuVB06G05970	BjuVB02G50470	BjuVB04G19850	BjuVB02G10750	BjuVB04G19910	BjuVA01G05190	BjuVB02G28100	BjuVB02G73530	BjuVA02G07070	BjuVA09G53400	BjuVB04G23100		BjuVB06G55410
BjuVB05G04050	BjuVA05G00910	BjuVA01G38490	BjuVA02G01920	BjuVA09G42810	BjuVA02G11920	BjuVB03G42480	BjuVB05G47730		BjuVB05G20330	BjuVB02G55710	BjuVA05G27250	BjuVA07G30390		BjuVB08G28590
BjuVA06G10890	BjuVB02G64240	BjuVB06G09610	BjuVB08G20250	BjuVA09G25390		BjuVB03G48320	BjuVB01G32770		BjuVA08G16490	BjuVA09G65730	BjuVA04G34020	BjuVB02G39060		BjuVB04G35850
BjuVB02G39050	BjuVB02G63500	BjuVB02G59460	BjuVB01G10610	BjuVA10G09800		BjuVB06G48950	BjuVA06G04260		BjuVA09G57540	BjuVA10G22870	BjuVB06G10170	BjuVB07G28630		BjuVA04G03850
BjuVA09G42360	BjuVB06G11320	BjuVA02G09330	BjuVA06G44300	BjuVA03G53020		BjuVB02G53910	BjuVB04G52130		BjuVA10G05450	BjuVA06G38600	BjuVA08G07600	BjuVB02G34680		BjuVA09G46860
BjuVB01G14700	BjuVA06G34830	BjuVB08G59610	BjuVA10G11910	BjuVA01G23670		BjuVB01G32670	BjuVB02G40460		BjuVB02G18840	BjuVA09G11100	BjuVA03G49210	BjuVB02G64740		BjuVA07G17530
BjuVB08G35910	BjuVB07G08130	BjuVA08G33680	BjuVB01G10930	BjuVB04G04740		BjuVA03G59930	BjuVB06G51870		BjuVB02G14050	BjuVA09G40240	BjuVA06G26570	BjuVB02G12100		BjuVA04G04090
BjuVA09G05850	BjuVB02G42240	BjuVB02G46700	BjuVB02G33930			BjuVB08G58160	BjuVB06G05950		BjuVA10G22360	BjuVB07G19630	BjuVB01G25870	BjuVB07G45740		BjuVA03G29600
BjuVA10G34110	BjuVA05G40620	BjuVA01G34820	BjuVB05G29250			BjuVB02G75890	BjuVA07G14330		BjuVA01G22520	BjuVA08G13230	BjuVA10G11960	BjuVA03G49600		BjuVA07G23170
BjuVB05G53440	BjuVB03G27320	BjuV_Contig00859G00160	BjuVB02G51520			BjuVA07G16200	BjuVB08G38470		BjuVA09G29130	BjuVB04G01150	BjuVB08G11550	BjuVB06G12290		BjuVA03G02500
BjuVB07G15980	BjuVA07G18920	BjuVB04G28190	BjuVA01G36670			BjuVB06G23360	BjuVA02G18400		BjuVB07G15080	BjuVA02G42610	BjuVA06G12370	BjuVB04G21800		BjuVA01G16500
BjuVB03G47080	BjuVA05G24690	BjuVA05G06250	BjuVB01G36120			BjuVA01G34730	BjuVA06G05650		BjuVB02G35200	BjuVB02G66970	BjuVB06G00550	BjuVB03G10550		BjuVA09G40880
BjuVA09G10080	BjuVB06G36500	BjuVB05G01030	BjuVA09G48830			BjuVB05G06850	BjuVA09G00960		BjuVB03G33670	BjuVB02G68300	BjuVB02G03280	BjuVB06G36680		BjuVB04G19310
BjuVB02G15770	BjuVB06G08780	BjuVA07G20000	BjuVB04G21150			BjuVA09G07340	BjuVB08G51930		BjuV_Contig00676G00120	BjuVA07G11560	BjuVB05G05800	BjuVB04G04930		BjuVB08G17220
BjuVA07G36750	BjuVA01G11450	BjuVA04G00270	BjuVB01G02660			BjuVB05G04980	BjuVB03G43120		BjuVA09G50630	BjuVB08G12610	BjuVA05G39540	BjuVB06G02640		BjuVA09G23280
BjuVB01G04250	BjuVB03G11550	BjuVB05G08740	BjuVB02G61990			BjuVB07G00520	BjuVB02G43270		BjuVB02G34030	BjuVA03G22130	BjuVB05G58970	BjuVA09G07490		BjuVB01G18330
BjuVA01G38670	BjuVA02G28580	BjuVB02G56660	BjuVB08G12290			BjuVA05G06400	BjuVA09G34420		BjuVB05G10380	BjuVA09G68970	BjuVB04G50280	BjuVA02G49480		BjuVB02G64730
BjuVB06G17120	BjuVA06G10010	BjuVA05G41620	BjuVB06G01210			BjuVA10G27730	BjuV_Contig00477G00090		BjuVB05G11380	BjuVA04G11220	BjuVB08G59360	BjuVB02G66340		BjuVB08G55260
BjuVA03G27750	BjuVB06G57670	BjuVA03G47470	BjuVA02G30450			BjuVB07G09460	BjuVB02G69950		BjuVB05G53140	BjuVA01G03430	BjuVB02G35140			BjuVB08G24960
BjuVB02G34800	BjuVA06G16850	BjuV_Contig00265G00120	BjuVB05G04740			BjuVB07G27190	BjuVB07G40850		BjuVB06G37070	BjuVA05G05660	BjuVB01G32500			BjuVB04G01270
BjuVB04G05990	BjuVB08G59620	BjuVA10G19640	BjuVA09G21140			BjuVB05G18880	BjuVA04G06390		BjuVB04G50660	BjuVB07G49220	BjuVA01G14080			BjuVB01G04040
BjuVA07G17890	BjuVA06G15040	BjuVA04G15740	BjuVA02G41910			BjuVB06G14470	BjuVA01G23940		BjuVB02G09140	BjuVB06G03970	BjuVA09G45730			BjuVB07G23310
BjuVB08G55500	BjuVA05G09060	BjuVA03G14080	BjuVA01G15630			BjuVB02G43260	BjuVB02G09950		BjuVA01G40020	BjuVA04G29580	BjuVB08G46970			BjuVB02G73020
BjuVA08G21410	BjuVA07G30070	BjuVA09G64010	BjuVA03G45120			BjuVA02G09270	BjuVA03G07930		BjuVB08G00400	BjuVA06G30270	BjuVA07G16680			BjuVB04G05820
BjuVA03G63340	BjuVB03G45990	BjuVB04G42710	BjuVB08G09730			BjuVA02G13870	BjuVB05G05010		BjuVA05G08610	BjuVB06G40360	BjuVA09G26080			BjuVA02G10250
BjuVB08G45700	BjuVB01G39840	BjuVB06G52350	BjuVB02G73310			BjuVA01G36940	BjuVA03G44830		BjuVB05G26450	BjuV_Contig00580_ERROPOS930405+G00230	BjuVA04G10450			BjuVA02G33530
BjuVA04G31040	BjuVB01G30520	BjuVA07G16040	BjuVA10G14860			BjuVA02G23790	BjuVA10G28140		BjuVA05G06590	BjuVB04G24370	BjuVB04G01000			BjuVA09G57350
BjuVA09G59580	BjuVA07G14540	BjuVA01G09520	BjuVA06G35560			BjuVA02G48450	BjuVB07G38760		BjuVB03G51320	BjuVA06G08780	BjuVA09G25650			BjuVB06G16080
BjuVA09G05860	BjuV_Contig00886G00110	BjuVB04G36110	BjuVA07G16650			BjuVB08G09710	BjuVB06G52650		BjuVA04G17150	BjuVB01G33750	BjuVB02G57730			BjuVB01G09560
BjuVA09G02830	BjuVA02G09550	BjuVB06G10220	BjuVA10G20700			BjuVB06G49140	BjuVA03G67730		BjuVB04G07270	BjuVB07G25210	BjuVA09G59220			BjuVB02G50910
BjuVA04G28910	BjuVB02G01850	BjuVB03G04480	BjuVB07G28280			BjuVA02G17830	BjuVA02G48060		BjuVA03G62660	BjuVA01G23650	BjuVB01G43870			BjuVB05G10030
BjuVA06G43050	BjuVA09G06270	BjuVA05G43180	BjuVA09G41460			BjuVB04G52050	BjuVB05G20050		BjuVB03G46300	BjuVA10G30330	BjuVB06G19750			BjuVA04G03730
BjuVA06G21190	BjuVB07G16610	BjuVA08G23610	BjuVB07G49390			BjuVA04G02500	BjuVA08G36390		BjuVB07G00230	BjuVB07G27250	BjuVA07G21250			BjuVB08G35270
BjuVA07G44760	BjuVB03G45500	BjuVA03G12200	BjuVB07G09800			BjuVB02G02880	BjuVA05G09960		BjuVA10G00750	BjuVB07G26310	BjuVA05G15240			BjuVB07G14710
BjuVB04G30020	BjuVA03G39690	BjuVA06G29030	BjuVA01G04920				BjuVB03G14250		BjuVA02G07410	BjuVB05G02850	BjuVB06G35590			BjuV_Contig00875G00030
BjuVB02G03140	BjuVB02G44020	BjuVA03G04540	BjuVA02G01070				BjuVB01G19270		BjuVA02G00270	BjuVB08G56500	BjuVB02G10420			BjuVB06G07100
BjuV_Contig00683G00560	BjuVA02G03990	BjuVA01G42210	BjuVB02G33340				BjuVA08G07580		BjuVB04G20770	BjuVA07G36840	BjuVB08G13100			BjuVB04G13150
BjuVB06G47130	BjuVB05G16510	BjuVA08G33450	BjuVB05G33090				BjuVB01G11180		BjuVA09G65280	BjuVB02G50890	BjuVB05G52430			BjuVA05G02340
BjuVA09G39220	BjuVB03G50510	BjuVA03G49620	BjuVA05G30960				BjuVA04G33660		BjuVB04G12350	BjuVB01G04360	BjuVA03G48520			BjuVB03G43280
BjuVB06G48030	BjuVA05G10520	BjuVA03G05380	BjuVB04G02550				BjuVB03G15920		BjuVA08G32900	BjuVB04G14350	BjuV_Contig00683G00500			BjuVA03G22040
BjuVA06G28280	BjuVA06G33920	BjuVA09G21820	BjuVA07G28260				BjuVB04G09470		BjuVB01G32550	BjuVA01G20190	BjuVA02G08760			BjuVB08G21380
BjuVB05G33440	BjuVA05G34020	BjuVA09G40080	BjuVA09G66960				BjuVB05G43560		BjuVA09G47930	BjuVA07G28430	BjuVB02G70900			BjuVB06G06020
BjuVB03G01900	BjuVB05G17470	BjuVA03G40520	BjuVA09G34920				BjuVB03G37950		BjuVA08G38370	BjuVA10G11250	BjuVA01G33660			BjuVB03G01890
BjuVA03G26070	BjuV_Contig00859G00120	BjuVB07G13200	BjuVA07G02650				BjuVB04G08520		BjuVB03G42000	BjuVB07G18180	BjuVB05G53130			BjuVB06G55190
BjuVA02G04510	BjuVA06G48140	BjuVA05G06790	BjuVB02G44100				BjuVA09G44350		BjuV_Contig00473G00100	BjuVA07G39110	BjuVB07G36400			BjuVB08G02120
BjuVA04G12100	BjuVA06G40590	BjuVB05G13780	BjuVB02G45100				BjuVB08G02750		BjuVB05G13990	BjuVB03G29320	BjuVA02G00160			BjuVA10G12250
BjuVA07G36590	BjuVA10G30380	BjuVB02G68320	BjuVB05G01160				BjuVB08G02720		BjuVB08G21160	BjuVA01G00020	BjuVA05G01010			BjuVA06G13230
BjuV_Contig00580_ERROPOS930405+G00310	BjuVA04G22970	BjuVA08G29200	BjuVB01G25410				BjuVA05G35150		BjuVB01G44410	BjuVA06G20640	BjuVB01G27010			BjuVA03G26780
BjuVB02G45740	BjuVB03G04690	BjuVB04G01840	BjuVB06G08120				BjuVB06G49320		BjuVB04G22260	BjuVB03G43950	BjuVB06G26660			BjuVA05G29850
BjuVA07G07930	BjuVA07G43250	BjuVB01G32920	BjuVA05G32250				BjuVA08G09160		BjuVA03G21850	BjuVA05G05320	BjuVA07G33630			BjuVB02G14270
BjuVB08G56360	BjuVB02G54160	BjuVA05G38910	BjuVA03G20070				BjuVB01G24280		BjuVA05G34250		BjuVA09G16290			BjuVB08G27290
BjuVA06G15770	BjuVA03G38230	BjuVA07G26500	BjuVB08G28160				BjuVB02G45110		BjuVB08G55160		BjuVB06G37500			BjuVA06G21990
BjuVA03G61520	BjuVA03G50110	BjuVB08G31010	BjuVB06G22310				BjuVA09G23130		BjuVB03G03990		BjuVA04G04330			BjuVA09G27370
BjuVA01G04340	BjuVA02G19180	BjuVB06G44200	BjuVB04G09080				BjuVA09G41410		BjuVB02G60420		BjuVA08G19580			BjuVB08G44720
BjuVA02G21300	BjuVB08G07020	BjuVA05G08930	BjuVA03G22450				BjuVA01G17520		BjuVA01G06130		BjuVB07G24130			BjuVB07G35010
BjuVA05G04540	BjuVB02G40410	BjuVA01G32540	BjuVB05G47100				BjuVB02G36850		BjuVB06G58010		BjuVA06G32740			BjuVA09G56600
BjuVA04G02980	BjuVA02G49020	BjuVA09G21030	BjuVB07G47690				BjuVA01G01150		BjuVB03G42050		BjuVB01G32700			BjuVB04G35290
BjuVB02G72900	BjuVB03G42090	BjuVB02G73000	BjuVA07G43180				BjuVB04G44310		BjuVA07G43650		BjuVB07G12030			BjuVA06G13830
BjuVB01G06180		BjuVA03G10270	BjuVB01G11110				BjuVA03G04260		BjuVA09G15310		BjuVA05G14650			BjuVB08G30970
BjuVB02G13280		BjuVA08G30400	BjuVB03G39520				BjuVB04G38750		BjuVA01G43820		BjuVB07G30310			BjuVA03G31560
BjuVB08G05030		BjuVA06G34570	BjuVB02G22420				BjuVA05G02380		BjuVB04G18750		BjuVB03G35030			BjuVB01G33410
BjuVA03G40980		BjuVB07G11920	BjuVA06G35440				BjuVB05G09130		BjuVB01G10210		BjuVA01G32910			BjuVA02G15110
BjuVB07G04830		BjuVA09G33960	BjuVB01G24170				BjuVB04G17750		BjuVB08G52480		BjuVA07G40830			BjuVB08G31310
BjuVB02G55460		BjuVA05G08830	BjuVA07G26760				BjuVB07G18980		BjuVB01G29060		BjuVA03G13540			BjuVA07G01220
BjuVB02G04460		BjuVA08G36590	BjuVA02G15440				BjuVA10G32510		BjuVA01G34610		BjuVB02G35150			BjuVB03G19170
BjuVB02G42440		BjuVA09G64020	BjuVB05G13250				BjuVB01G40070		BjuVA09G57740		BjuVB02G53950			BjuVA09G48240
BjuVB04G07250		BjuVB04G15120	BjuVB03G50720				BjuVA06G47410		BjuVA02G00550		BjuVB04G44110			BjuVB08G48870
BjuVB06G32410		BjuVA09G40600	BjuVB06G16630				BjuVB06G39970		BjuVA05G11000		BjuV_Contig00477G00170			BjuVB04G31740
BjuVA09G64240		BjuVA01G30810	BjuVA07G43020				BjuVA02G10650		BjuV_Contig00694G00320		BjuVA08G25860			BjuVB04G16210
BjuVB08G54240		BjuV_Contig00458G00200	BjuVB02G45560				BjuVB08G06200		BjuV_Contig00466G00240		BjuVB02G16680			BjuVB05G35130
BjuVA09G23230		BjuVB03G08160	BjuV_Contig00877G00100				BjuVA01G16200		BjuVA02G05520		BjuVB06G14670			BjuVA10G16940
BjuVB03G16800		BjuVA09G66410	BjuVB03G31750				BjuVA10G33470		BjuVA09G14660		BjuVB08G26790			BjuVA05G15050
BjuVA03G45860		BjuVA01G19680	BjuVA02G20180				BjuVA08G28490		BjuVB02G53430		BjuVA10G23750			BjuVA06G18100
BjuVA07G36600		BjuVA05G10600	BjuVB02G67200				BjuVA05G12930		BjuVB03G54580		BjuVA03G57800			BjuVB03G49540
BjuVA04G25850		BjuVA07G07720	BjuVA03G40280				BjuVB02G44260		BjuVB05G50920		BjuVA08G19620			BjuVB03G07210
BjuVA09G65410		BjuVA10G06280	BjuVB02G07410				BjuVB02G46980		BjuVA01G07100		BjuVA10G27190			BjuVA09G42780
BjuVA01G14900		BjuVA06G25840	BjuVB03G20810				BjuVB04G30050		BjuVB01G39300		BjuV_Contig00909G00220			BjuVB08G54780
BjuVA09G37360		BjuVA04G34900	BjuVA02G05160				BjuVA04G06720		BjuVB01G29720		BjuVA09G00660			BjuVA01G19160
BjuVA03G18320		BjuVA05G44800	BjuVA03G50370				BjuVB01G17210		BjuVB04G19950		BjuVA06G27620			BjuVA10G17250
BjuVA09G51230		BjuVA04G16430	BjuVA02G33840				BjuVB08G29350		BjuVA02G21000		BjuVA03G13710			BjuVA05G06300
BjuVB01G24500		BjuVB02G05200	BjuVB02G31740				BjuVA09G06260		BjuVB02G27720		BjuVA03G52660			BjuVA10G22300
BjuVB05G59980		BjuVA05G39200	BjuVA01G10870				BjuVA07G06920		BjuVB08G46890		BjuVA01G03180			BjuVB04G33840
BjuVB06G51510		BjuVB01G04870	BjuVA05G06180				BjuVB02G36840		BjuVB01G37820		BjuVA10G28500			BjuVB02G28390
BjuVB06G13270		BjuVA06G39930	BjuVA02G01800				BjuVB04G35330		BjuVA05G03590		BjuVB03G39090			BjuVA05G38520
BjuVA03G39630		BjuVB04G36630	BjuVB07G14820				BjuVB06G55620		BjuVA05G06350		BjuVA07G22100			BjuVA01G26980
BjuVA03G36560		BjuVA10G31520	BjuVA08G20750				BjuVA08G19330		BjuVB08G42890		BjuVB04G02480			BjuVB03G44030
BjuVA07G37950		BjuVB07G11200	BjuVB01G02060				BjuV_Contig01058_ERROPOS1500000G00020		BjuVA06G04200		BjuVA08G02150			BjuVA10G09990
BjuVA05G36910		BjuVB03G55010	BjuVA09G43750				BjuVA09G67480		BjuVB02G13660		BjuVA09G13910			BjuVA10G10470
BjuVA07G37300		BjuVA02G07370	BjuVA02G05180				BjuVA09G50800		BjuVB05G32630		BjuVB02G60920			BjuVB07G29680
BjuVB06G55240		BjuVB05G21780	BjuVA01G44070				BjuVB02G48330		BjuVA10G08180		BjuVB08G45900			BjuVB05G42770
BjuVB07G32560		BjuVA05G14330	BjuVA10G23390				BjuVB06G18570		BjuVB06G20450		BjuVA08G33010			BjuVA05G02880
BjuVA10G01090		BjuVB02G35210	BjuVA10G13260				BjuVA08G24810		BjuVA09G00830		BjuVA08G19350			BjuVB03G42790
BjuVA07G18500		BjuVA01G10520	BjuVA02G08170				BjuVB04G21740		BjuVA04G24400		BjuVB05G17080			BjuVA09G47830
BjuVB01G26270		BjuVB06G12480	BjuVA07G43790				BjuVA06G11690		BjuVB03G20040		BjuVB02G68340			BjuVA01G31980
BjuVB06G47380		BjuVA05G28120	BjuVB05G54960				BjuV_Contig00303G00060		BjuVB07G15110		BjuVA01G20620			BjuVB07G09950
BjuVB07G35880		BjuVA05G24950	BjuVA10G15650				BjuVB08G04520		BjuVB06G08390		BjuVB03G08100			BjuVB08G35380
BjuVB05G42790		BjuVA06G37580	BjuVA06G31480				BjuVA10G19090		BjuVA04G25010		BjuVB05G19270			BjuVA03G52750
BjuVB02G62780		BjuVB03G16770	BjuVA03G25080				BjuVA08G17490		BjuVB08G24770		BjuVA09G66380			BjuVB01G04900
BjuVB04G07790		BjuVA05G15600	BjuVB03G50760				BjuVA08G23400		BjuVA09G00760		BjuVA03G05920			BjuVA09G54580
BjuVB04G01780		BjuVA07G08220	BjuVB08G15860				BjuVB01G25600		BjuVB04G21420		BjuVA02G37860			BjuVB06G47870
BjuVB06G02030		BjuVA05G15490	BjuVA08G26070				BjuVA02G06030		BjuVB07G24640		BjuVA04G31370			BjuVB03G58260
BjuVB06G01220		BjuV_Contig00272G00160	BjuVA08G15490				BjuVA06G20290		BjuVA06G41050					BjuVA05G29250
BjuVA09G58040		BjuVB04G42070	BjuVB03G46170				BjuVA07G08440		BjuV_Contig01058_ERROPOS2600000G00310					BjuVB06G05880
BjuVB02G55860		BjuVA02G33140	BjuVB04G08300				BjuVB06G08640		BjuVA10G31440					BjuVB03G36940
BjuVA01G29990		BjuVB05G40440	BjuVB08G19760				BjuVA09G38540		BjuVB03G11520					BjuVA04G30260
BjuVB05G11290		BjuVA01G04650	BjuVA03G09680				BjuV_Contig00466G00220		BjuVA06G47400					BjuVB01G35040
BjuVB01G12500		BjuVA03G36940	BjuVB04G11070				BjuVA05G10360		BjuVA09G58210					BjuVB02G58250
BjuVA06G01850		BjuVA10G24750	BjuVA05G01450				BjuVA10G11980		BjuVB05G48050					BjuVA03G39210
BjuVA10G30570		BjuVB08G47860	BjuVA06G10220				BjuVA04G01740		BjuVA02G31710					BjuVB05G31340
BjuVA01G17800		BjuV_Contig00925G00170	BjuVA03G00730				BjuV_Contig00990G00040		BjuVA03G00870					BjuVA03G61900
BjuVB03G38830		BjuV_Contig00807G00040	BjuVA10G20200				BjuVB03G18700		BjuVB03G47640					BjuVA01G02370
BjuVA09G49470		BjuVA03G51640	BjuVA10G18800				BjuVA02G33550		BjuVB08G38880					BjuVA08G01780
BjuVB03G34110		BjuVB02G71030	BjuVA03G22780				BjuVB01G24290		BjuVB03G05240					BjuVB02G72010
BjuVB04G32680		BjuVA04G30290	BjuVB03G26160				BjuVB06G15760		BjuVB05G17380					BjuVB07G47390
BjuVA06G35480		BjuVB02G57650	BjuVB01G15430				BjuVA09G61170		BjuVB05G12330					BjuVA03G26470
BjuVB03G25190		BjuVA02G14940	BjuVA05G07730				BjuVB01G33900		BjuVB07G39780					BjuVA03G60090
BjuVA08G16140		BjuVA08G05950	BjuVB02G25570				BjuVA08G37400		BjuVA02G35840					BjuVA09G03250
BjuVA07G21570		BjuVA03G57420	BjuVB03G46430				BjuVA06G32050		BjuVA09G09530					BjuVA06G12740
BjuVA03G09830		BjuVA08G23410	BjuVA10G14460				BjuVA04G01770		BjuVA09G16260					BjuVA03G38500
BjuVA04G07330		BjuVA09G52800	BjuVA03G11340				BjuVA08G34620		BjuVA01G19240					BjuVA03G45680
BjuVB06G55210		BjuVB01G29330	BjuVA09G47290				BjuVB05G50180		BjuVB02G71900					BjuVA06G13220
BjuVA03G47080		BjuVB02G70440	BjuVA09G56320				BjuVA09G07990		BjuVA05G32790					BjuVB08G56300
BjuVB03G26280		BjuVB03G07740	BjuVB01G33850				BjuVA03G27250		BjuVB04G10480					BjuVA09G66400
BjuVB01G05350		BjuVA01G02380	BjuVB03G42900				BjuVB03G47570		BjuVB08G30840					BjuVB04G33480
BjuVB07G03840		BjuVB06G39500	BjuVB06G08430				BjuVB01G06880		BjuVA06G40560					BjuVB07G23930
BjuVB02G38840		BjuVB06G32760	BjuVA03G11490				BjuVA08G25170		BjuVB01G23190					BjuVB07G20040
BjuVB03G19330		BjuVA05G18530	BjuVB02G48040				BjuVA09G18840		BjuVB06G52130					BjuVA03G58190
BjuVB02G26440		BjuVA07G21750	BjuVB03G20490				BjuVB05G29120		BjuVA05G01820					BjuVB08G19710
BjuVA06G13760		BjuVB04G51840	BjuVA01G09760				BjuVB03G51370		BjuVB06G47920					BjuVB04G39060
BjuVA07G15550		BjuVA01G30030	BjuVA05G08740				BjuVB08G29780		BjuVA08G03310					BjuVB04G29570
BjuVB04G13920		BjuVA06G21940	BjuVA09G14980				BjuVA02G01990		BjuVA02G40500					BjuVA03G11400
BjuVB05G06480		BjuVB08G10700	BjuVA04G09030				BjuVA09G60960		BjuVB05G34270					BjuVA03G10280
BjuVB02G59130		BjuVB06G00620	BjuVB03G10590				BjuVB02G41980		BjuVB05G29660					BjuVB02G48770
BjuVA07G36800		BjuVA02G07360	BjuVB01G24540				BjuVA09G14750		BjuVB03G33350					BjuVA03G43320
BjuVA07G20150		BjuVB06G06080	BjuVA05G08350				BjuVA05G29890		BjuVB08G23370					BjuVA09G41120
BjuVB04G23380		BjuVA04G22890	BjuVA08G03650				BjuVB01G43320		BjuVB04G00340					BjuVB06G53040
BjuVB07G20340		BjuVB08G39000	BjuVA10G23360				BjuVB03G12010		BjuVB02G55350					BjuVA06G36170
BjuVA02G46690		BjuVA05G40670	BjuVB08G51560				BjuVA03G25530		BjuVA01G11670					BjuVB02G21420
BjuVA08G26440		BjuVB03G19260	BjuVA05G02230				BjuVB08G34890		BjuVA08G34280					BjuVB01G14960
BjuVB03G19630		BjuVB02G13070	BjuVB07G23820				BjuVB06G08440		BjuVA09G62430					BjuVA03G20950
BjuVA09G47460		BjuVA02G10310	BjuVB03G50880				BjuVB08G29140		BjuVB05G30350					BjuVB01G05850
BjuVB05G24700		BjuVB07G32050	BjuVA06G40010				BjuVB05G38370		BjuVA03G23910					BjuVB06G54760
BjuVA06G34340		BjuVB05G12160	BjuVA01G12210				BjuVB03G40640		BjuVA01G29550					BjuVB05G18590
BjuVB03G08640		BjuVA09G62380	BjuVB07G40320				BjuVB06G24990		BjuVA06G46260					BjuVB08G04990
BjuVB02G25760		BjuVA03G37100	BjuVB03G20180				BjuVA10G25040		BjuVB01G00160					BjuVB02G71670
BjuVB07G16520		BjuVB06G34470	BjuVB02G26050				BjuVB05G23710		BjuVB05G30930					BjuVB04G16370
BjuVA02G40980		BjuVA04G30080	BjuVB04G30490				BjuVB05G36550		BjuVB07G47770					BjuVA01G36460
BjuVA08G02200		BjuVB08G20440	BjuVA07G39500				BjuVB01G08940		BjuVB02G12640					BjuVA02G46780
BjuVB08G53610		BjuVB03G25080	BjuVA09G29580				BjuVA01G02570		BjuVA09G52060					BjuVA05G07360
BjuVA04G15010		BjuVB08G36160	BjuVB05G14570				BjuVB06G03860		BjuVA03G24950					BjuVA05G12660
BjuVB06G04220		BjuVA03G62440	BjuVA02G33630				BjuVA08G00230		BjuVB02G48350					BjuVB08G49970
BjuVA07G42260		BjuVB08G23640	BjuVB01G38080				BjuVB08G04800		BjuVA08G24450					BjuVB07G45330
BjuVA02G48290		BjuVA03G33530	BjuVA08G25030				BjuVA03G00090		BjuVB06G27670					BjuVB06G20970
BjuVA08G30950		BjuVB02G35980	BjuVB04G51000				BjuVA03G67740		BjuVB06G50380					BjuVB05G12480
BjuVA02G00180		BjuVB05G25670	BjuVB03G45790				BjuVA05G05270		BjuVA08G09600					BjuVB02G02150
BjuVB08G22200		BjuVB08G22490	BjuVB01G03040				BjuVA03G57940		BjuVB03G15640					BjuVA09G09620
BjuVA09G20700		BjuVA08G14850	BjuVB02G15650				BjuVB05G56270		BjuVA03G56700					BjuVB05G44460
BjuVA04G24670		BjuVA09G51810	BjuVB06G56750				BjuVB01G47970		BjuVA08G08570					BjuVB07G03240
BjuVB04G12370		BjuVB06G00040	BjuVB04G10890				BjuVB03G07090		BjuVA03G01170					BjuVB04G41230
BjuVA01G18630		BjuVA02G48280	BjuVB06G44150				BjuVB06G08380		BjuVB02G00080					BjuVA03G50410
BjuVA07G23700		BjuVA03G62090	BjuVB03G33430				BjuVB05G03430		BjuVB05G23580					BjuVA07G29350
BjuVB02G03510		BjuVA08G10180	BjuVA05G05260				BjuVA07G15050		BjuVB06G04020					BjuVB08G40660
BjuVA09G59610		BjuVA05G37900	BjuVA02G15120				BjuVB08G50440		BjuVB06G13540					BjuVB01G43240
BjuVA03G34620		BjuVA05G06990	BjuVB01G04600				BjuVB01G27810		BjuVA10G24840					BjuVB08G57310
BjuVA02G45610		BjuVA05G27600	BjuVB06G00170				BjuVB06G07110		BjuVA05G19350					BjuVA07G34010
BjuV_Contig00578G00040		BjuVA02G38850	BjuVB06G15190				BjuVA10G25030		BjuVA01G11160					BjuVA07G34020
BjuVB06G44170		BjuVB04G11090	BjuVB05G02930				BjuVB02G40040		BjuVA03G07920					BjuVA08G09470
BjuVB06G09260		BjuVA01G03700	BjuVA01G25290				BjuVA09G01230		BjuVB02G39010					BjuVB05G12990
BjuVA05G18070		BjuVB03G44040	BjuVA07G39610				BjuVA06G46920		BjuVA07G23130					BjuVB07G30460
BjuVA03G00160		BjuVA04G04450	BjuVA02G06090				BjuV_Contig00580_ERROPOS930405+G00130		BjuVA09G08960					BjuVA03G46710
BjuVA01G03310		BjuVA06G19170	BjuVB06G48240				BjuVB08G30310		BjuVA02G48610					BjuVA03G42430
BjuVB06G20440		BjuVA03G43820	BjuVA03G21230				BjuVA09G68310		BjuVB03G18080					BjuVA06G10240
BjuVB05G15950		BjuVB06G17360	BjuVA06G14200				BjuVB04G34880		BjuVA01G25970					BjuVB06G36910
BjuVB08G24820		BjuVB02G67540	BjuVB01G16630				BjuVA07G36940		BjuVA09G17630					BjuVB03G30110
BjuVA04G05930		BjuVA09G37830	BjuVB01G42870				BjuVB02G62720		BjuVA07G35310					BjuVB01G20310
BjuVB03G36540		BjuVA05G02700	BjuVB02G30270				BjuVA03G35140		BjuVB07G49850					BjuVA09G64610
BjuVB05G13740		BjuVB01G45450	BjuVB07G45550				BjuVA10G12000		BjuVA06G12820					BjuVA05G27740
BjuVB08G56650		BjuVB01G48800	BjuVA04G17090				BjuVA06G21590		BjuVB08G10480					BjuVA04G29290
BjuVB01G40550		BjuVA01G34170	BjuVB07G32160				BjuVA05G38330		BjuVB02G20510					BjuVA01G08350
BjuVB04G00320		BjuVA09G63250	BjuVA03G37260				BjuVA02G48920		BjuVA08G36320					BjuVB01G01060
BjuVB04G05810		BjuVB03G09100	BjuVA06G10940				BjuVB07G38560		BjuVA03G54840					BjuVA02G39760
BjuVB08G52010		BjuVB02G64340	BjuVA07G38710				BjuVA08G31440		BjuVB04G45480					BjuVB04G29220
BjuVA09G37860		BjuVB03G26840	BjuVA02G04950				BjuV_Contig00859G00100		BjuVB02G17090					BjuVA07G11770
BjuVB05G18460		BjuVB07G03330	BjuVB06G40330				BjuVB05G26060		BjuVA10G28540					BjuVA08G30140
BjuVA09G65480		BjuVB03G47400	BjuVA10G27180				BjuVA03G36250		BjuVA08G27830					BjuVA02G16530
BjuVA03G50890		BjuVB06G06470	BjuVB01G13020				BjuVA05G36200		BjuVB05G15720					BjuVA02G11730
BjuVB07G04400		BjuVB03G52730	BjuVA02G41720				BjuVB02G11440		BjuVB03G14950					BjuVA05G29820
BjuVB07G16510		BjuVB03G14060	BjuVA06G22370				BjuVA10G27160		BjuVB05G20400					BjuVA07G29610
BjuVB06G48680		BjuVB05G31520	BjuVB04G21450				BjuVA07G10910		BjuVB06G06260					BjuVB02G70570
BjuVB03G37520		BjuVA05G26650	BjuVA06G38740				BjuVA06G12690		BjuVB05G60040					BjuVB05G36980
BjuVA02G21350		BjuVB08G08080	BjuVA07G39580				BjuVB01G08290		BjuVA04G29120					BjuVA10G10460
BjuVA08G17010		BjuVA10G14850	BjuVA06G43020				BjuVA07G30680		BjuVA03G26360					BjuVB05G07840
BjuVA07G10160		BjuVB02G31350	BjuVB04G00380				BjuVB02G52780		BjuVB08G46700					BjuVA09G27470
BjuVA07G36560		BjuVB04G36850	BjuVB08G07800				BjuVA01G21840		BjuVB02G31260					BjuVA01G39840
BjuVB02G66430		BjuVB02G34090	BjuVB05G56800				BjuVA05G25490		BjuVA03G66990					BjuVA06G46330
BjuVB08G49450		BjuVB07G42380	BjuVB01G23180				BjuVA06G39070		BjuVB04G33810					BjuVA09G43920
BjuVB04G06060		BjuVB07G28420	BjuVA02G49260				BjuVB02G30420		BjuVB05G03640					BjuVB07G39010
BjuVB02G38280		BjuVA10G19920	BjuVA10G19040				BjuVA09G48600		BjuVA06G07240					BjuVB02G38940
BjuVB02G61180		BjuVB03G33140	BjuVA06G06460				BjuVA05G08880		BjuVB01G07120					BjuVA03G07990
BjuVB03G18050		BjuVA01G03880	BjuVB03G16860				BjuVA02G03380		BjuVB06G49730					BjuVB02G57560
BjuVB05G13960		BjuVB04G40240	BjuVB05G41300				BjuVA02G03980		BjuVA06G03730					BjuVA07G13130
BjuVA04G11560		BjuVB06G23080	BjuVB04G11440				BjuVA04G31290		BjuVB08G39310					BjuVB01G35030
BjuVA01G04350		BjuVA03G15590	BjuVA07G20050				BjuVB02G54530		BjuVA08G20530					BjuVB06G19400
BjuVA02G25480		BjuVB08G16680	BjuVA03G06720				BjuVB01G05080		BjuVA07G37160					BjuV_Contig00711G00020
BjuVA07G26530		BjuVA02G29010	BjuVA04G24740				BjuVA08G21770		BjuVA02G16110					BjuVB08G36740
BjuVB01G20240		BjuVA07G18710	BjuVA06G19320				BjuVB07G46100		BjuVB02G39030					BjuVA10G33250
BjuVA10G23730		BjuVB04G32360	BjuVA07G34000				BjuVB04G29300		BjuVA09G44620					BjuVA04G07140
BjuVB02G39450		BjuVB01G41630	BjuVA01G10550				BjuVA04G23340		BjuVB04G02260					BjuVA03G63690
BjuVA02G19990		BjuVB02G67650	BjuVA01G22690				BjuVA05G43120		BjuVB02G46990					BjuVB03G33300
BjuVA02G08590		BjuVA04G26960	BjuVA04G14190				BjuVB01G05070		BjuV_Contig00235G00290					BjuVA07G32500
BjuVA05G08530		BjuVA01G20850	BjuVA04G23480				BjuVB01G20020		BjuVB06G01530					BjuVB03G07990
BjuVA01G06260		BjuVB07G02180	BjuVB02G53290				BjuVB08G49960		BjuVA03G31510					BjuVA02G07530
BjuVA06G32100		BjuVA09G66060	BjuVB06G01910				BjuVA09G15880		BjuVA05G12770					BjuVB03G30080
BjuVA02G21600		BjuVA05G15500	BjuVB08G27720				BjuVA07G11010		BjuVA04G12750					BjuVA01G40500
BjuVA05G41290		BjuVA04G16900	BjuVA07G30300				BjuVA02G43330		BjuVB03G09300					BjuVB02G66830
BjuVA08G17380		BjuVB07G12700	BjuVB03G03350				BjuVB06G22880		BjuVB01G22960					BjuVB03G07680
BjuVA01G39280		BjuVA02G03080	BjuVB02G00720				BjuVA07G43700		BjuVA08G20670					BjuVB05G23700
BjuVA02G48310		BjuVB07G07860	BjuVA09G20830				BjuVB06G08590		BjuVA05G16790					BjuVA08G20760
BjuVB02G74090		BjuVB01G16830	BjuVA06G09040				BjuVB06G21480		BjuVA01G03870					BjuVA06G20670
BjuVB07G05440		BjuVB04G23880	BjuVA06G10100				BjuVA05G15630		BjuVA01G22240					BjuVB02G04360
BjuVA03G12810		BjuV_Contig00718G00070	BjuVB07G41430				BjuVA03G11980		BjuVA07G44840					BjuVB04G11160
BjuVB03G46470		BjuVA04G18450	BjuVB05G30180				BjuVA03G00340		BjuVB05G02140					BjuVB04G43160
BjuVA01G40420		BjuVB02G30780	BjuVB05G17830				BjuVB03G20190		BjuVB02G13060					BjuVA02G37430
BjuVB02G56330		BjuVB02G07700	BjuVA09G68570				BjuVB02G36020		BjuVA01G29670					BjuVA08G03470
BjuVA04G29830		BjuVB06G23780	BjuVB02G53280				BjuVA07G34840		BjuVA03G28730					BjuVA06G15510
BjuVB08G28370		BjuVA03G58880	BjuVB02G07770				BjuVA04G09700		BjuVB02G08220
BjuVB08G53060		BjuVB07G29480	BjuVB03G13320				BjuVA08G25440		BjuVB06G03330
BjuVB04G31520		BjuVA05G05950	BjuVB03G42040				BjuVA04G16800		BjuVB03G38620
BjuVB04G14340		BjuVA09G51310	BjuVA06G34330				BjuVB05G29550		BjuVA02G49360
BjuVB02G00190		BjuVB05G36310	BjuVB04G43480				BjuVB01G03990		BjuVB05G23540
BjuVB05G29770		BjuV_Contig00580_ERROPOS930405+G00370	BjuVA05G29750				BjuVA06G33080		BjuVA08G17900
BjuVB01G01110		BjuVB05G36430	BjuVA08G16470				BjuVB02G53560		BjuVA06G46290
BjuVA02G00060		BjuVA06G06090	BjuVA10G33460				BjuVA01G09330		BjuVA03G48500
BjuVA06G27020		BjuVB08G51070	BjuVA07G02100				BjuVB02G69570		BjuVB01G41440
BjuVB06G55250		BjuVA07G18540	BjuVB04G13820				BjuVB02G72570		BjuVA05G11580
BjuVB05G17090		BjuV_Contig00477G00050	BjuVB04G19300				BjuVA08G13100		BjuVB05G01380
BjuVA03G60110		BjuVA05G16990	BjuVA10G24060				BjuVB04G34810		BjuVA04G15840
BjuVA03G63360		BjuVA10G09860	BjuVB07G12960				BjuVB02G66650		BjuVA06G34610
BjuVA06G02010		BjuVB08G32970	BjuVB01G14100				BjuVA10G00040		BjuVA02G40370
BjuVB07G18640		BjuVB07G18090	BjuVA03G23620				BjuVA03G56860		BjuVB04G28070
BjuVB07G06680		BjuVA07G34580	BjuVB02G50210				BjuVA08G16340		BjuVB05G06370
BjuVA08G03840		BjuVB03G58400	BjuVA07G31100				BjuVB04G04320		BjuVA01G17600
BjuVB01G39740		BjuVA05G00400	BjuVA02G23700				BjuVB07G17790		BjuVB06G26200
BjuVA09G48310		BjuVB05G14760	BjuVA09G08780				BjuVA08G00280		BjuVB08G50720
BjuVA06G38450		BjuVB01G42360	BjuVA02G47910				BjuVB02G54320		BjuVA05G32280
BjuVB02G01120		BjuVB04G29610	BjuVB07G05720				BjuVB06G16560		BjuVB05G37910
BjuVA07G40280		BjuVB04G36350	BjuVB08G42720				BjuVA03G05450		BjuVA05G38610
BjuVB06G57920		BjuVB08G42770	BjuVA09G49080				BjuVA07G19650		BjuVA02G05590
BjuVA01G04230		BjuVA06G18830	BjuVB01G21320				BjuVB05G10580		BjuVA10G16200
BjuVB05G04060		BjuVA09G07850	BjuVB02G01170				BjuVA05G12980		BjuVA07G42540
BjuVA05G01400		BjuVB08G08370	BjuVA09G33670				BjuVB02G75100		BjuVA08G03590
BjuVB08G13820		BjuVA06G40980	BjuVB03G30860				BjuVB04G12440		BjuVA05G13930
BjuVB06G07350		BjuVB03G01740	BjuVA02G45720				BjuVA07G12120		BjuVA06G38560
BjuVB01G33500		BjuVA09G34230	BjuVB05G05670				BjuVB06G35190		BjuVA06G20040
BjuVB01G45030		BjuVB05G36740	BjuVA09G04420				BjuVB03G15310		BjuVB05G45630
BjuVA07G39760		BjuVA03G09940	BjuVB03G46260				BjuVA04G17270		BjuVA06G40120
BjuVB07G19940		BjuVB01G46180	BjuVA09G25540				BjuVA06G11940		BjuVB02G68030
BjuVB08G05200		BjuVB03G44050	BjuVB02G53170				BjuVB01G40520		BjuVA03G23790
BjuVB03G34380		BjuVA09G39760	BjuVB03G35930				BjuVB03G32790		BjuVA08G37630
BjuVA01G12590		BjuVB05G12270	BjuVA01G26470				BjuVA03G28090		BjuVB08G08140
BjuVB05G53400		BjuVA03G53850	BjuVB08G46230				BjuVA02G43260		BjuVB04G43440
BjuVB02G20770		BjuVA04G13360	BjuVB01G42560				BjuVB01G41090		BjuVA09G51360
BjuVB02G59140		BjuVA05G16040	BjuVA07G05110				BjuVA03G40720		BjuVB05G00530
BjuVB03G03130		BjuVB05G23150	BjuVA05G33060				BjuVB07G16940		BjuVA09G04770
BjuVA06G25400		BjuVB02G08050	BjuV_Contig00580_ERROPOS930405G00050				BjuVB06G48480		BjuVB08G39830
BjuVB04G26270		BjuVA09G00180	BjuVA05G38140				BjuVB05G55840		BjuVB01G06820
BjuVB05G11200		BjuV_Contig00452G00010	BjuVB03G24530				BjuVB04G45030		BjuVB08G14820
BjuVA09G43020		BjuVA03G38220	BjuVB03G10470				BjuVB06G12780		BjuVA07G36140
BjuVA01G41110		BjuVB01G31360	BjuVB01G45760				BjuVB07G35240		BjuVA02G16890
BjuVA09G48270		BjuVB02G44440	BjuVA04G34400				BjuVB05G12370		BjuVB03G20410
BjuVA08G30920		BjuVA04G21590	BjuVA05G28110				BjuVB04G31720		BjuVA10G31450
BjuVA02G27880		BjuVA09G16230	BjuVB04G14200				BjuVB06G15330		BjuVB07G15100
BjuVA08G32970		BjuVA06G46320	BjuVB01G18600				BjuVB05G56260		BjuVA02G12220
BjuVB02G12710		BjuVA05G44520	BjuVA10G01920				BjuVA03G06260		BjuVA10G30140
BjuVB02G58670		BjuVB06G49500	BjuVB05G58800				BjuV_Contig00855G00310		BjuVB07G29210
BjuVA04G15520		BjuVA02G14610	BjuVB04G48720				BjuVA02G46870		BjuVA09G29000
BjuVB06G32370		BjuVB05G00480	BjuVA07G14470				BjuVB06G42930
BjuVB03G42690		BjuVB06G24970	BjuVB08G54850				BjuVB08G47690
BjuVA04G01070		BjuVA09G53830	BjuVA06G05790				BjuVA05G27320
BjuVA07G30860		BjuVB06G48940	BjuVA02G01770				BjuVB01G10400
BjuVB02G06330		BjuVA03G16130	BjuVB07G46260				BjuVA10G08370
BjuVA07G29470		BjuVB08G46340	BjuVA09G22910				BjuVA07G09720
BjuVB02G70910		BjuVA01G05160	BjuVB05G18720				BjuV_Contig00683G00420
BjuVA05G17020		BjuVB07G14680	BjuV_Contig00654_ERROPOS300000G01060				BjuVA03G37540
BjuVB05G17270		BjuVA06G32770	BjuVB02G55780				BjuVB08G55000
BjuVB02G43680		BjuVB04G02970	BjuVB03G42420				BjuVB07G38850
BjuVB07G41780		BjuVA09G57900	BjuVB04G38640				BjuVA05G41430
BjuVB08G15090		BjuVB06G58500	BjuVB01G13000				BjuVA01G00750
BjuVB04G08990		BjuVB06G33000	BjuVA02G28490				BjuVA10G05900
BjuVA04G00630		BjuVB03G12600	BjuVA03G62570				BjuVB06G53170
BjuVB05G21160		BjuVB02G67040	BjuVA09G11810				BjuVB01G13230
BjuVB05G13750		BjuVB06G36200	BjuVB06G00790				BjuVA09G57980
BjuVA08G16060		BjuVB05G16120	BjuVA03G11970				BjuVB01G01840
BjuVB07G03690		BjuVA09G27540	BjuVA03G13000				BjuV_Contig00715G00280
BjuVB06G49670		BjuVA10G22420	BjuVA05G05800				BjuVB08G33950
BjuVB06G50660		BjuVA05G17150	BjuVB04G12200				BjuVA03G44070
BjuVB08G28330		BjuVA07G22640	BjuVA06G18390				BjuVA03G14580
BjuVA08G25450		BjuVA03G16200	BjuVA03G30060				BjuV_Contig00867G00010
BjuVA10G27000		BjuVB04G50060	BjuVA02G29740				BjuVB07G40790
BjuVB01G29930		BjuVA03G43680	BjuVB01G01180				BjuVA05G33380
BjuVB02G07020		BjuVB03G57200	BjuVA05G37850				BjuVB07G19730
BjuVA06G30010		BjuVA06G34290	BjuVA08G08030				BjuVA09G53470
BjuVB02G61680		BjuVA05G09850	BjuVB02G27090				BjuVA09G16070
BjuVA07G36550		BjuVB08G13090	BjuVB01G08090				BjuVA03G39580
BjuVB06G04200		BjuVA01G16690	BjuVA06G41710				BjuVB03G56750
BjuVA09G19050		BjuVA07G04110	BjuVB03G27400				BjuVA04G09470
BjuVA10G27550		BjuVB04G14290	BjuVB04G26650				BjuVB02G24290
BjuVB03G16060		BjuVA06G19500	BjuVB03G09130				BjuV_Contig00265G00150
BjuVA07G36890		BjuVA03G13230	BjuVA06G34730				BjuVA05G15850
BjuVA03G47750		BjuVB01G19310	BjuVA10G00520				BjuVA04G16470
BjuVB02G57360		BjuVA01G37980	BjuVB02G09320				BjuVB03G37540
BjuVB06G01630		BjuVA05G25470	BjuVA10G18600				BjuVB03G08610
BjuVA09G11820		BjuVB08G48080	BjuVA02G05410				BjuVA01G29800
BjuVA10G33860		BjuVA10G11560	BjuVA09G57100				BjuVA02G15540
BjuVB04G29580		BjuVB05G06990	BjuVB06G13560				BjuVA08G03600
BjuVA07G40120		BjuVA06G28450	BjuVB01G05970				BjuVB05G38710
BjuVB08G38690		BjuVB02G13100	BjuVA03G66330				BjuVA09G02700
BjuVB04G31430		BjuVA01G36740	BjuVA08G20600				BjuVB08G18090
BjuVB07G33860		BjuVA06G15830	BjuVA05G05370				BjuVA03G58370
BjuVB02G39430		BjuVA05G06680	BjuVB02G65290				BjuVB06G22460
BjuVB06G50180		BjuVB07G03710	BjuVB03G41430				BjuVB05G08240
BjuVA10G05440		BjuVB02G54550	BjuVB08G09420				BjuVB05G12260
BjuVA05G35580		BjuVA06G29960	BjuVB06G09700				BjuVA03G17840
BjuVB02G68870		BjuVB07G38250	BjuVB03G11590				BjuVB05G16270
BjuVA03G50200		BjuVA01G13160	BjuVB07G28720				BjuVB02G34460
BjuVA05G09990		BjuVA09G42240	BjuVA07G38980				BjuVA03G21220
BjuVA09G46750		BjuVA03G04560	BjuVA09G44270				BjuVB07G23350
BjuVA03G32700		BjuVB04G49200	BjuV_Contig00458G00050				BjuVB07G18150
BjuVB02G41640		BjuVB07G21960	BjuVA06G07590				BjuVA05G27070
BjuVB08G55630		BjuVB08G15590	BjuVB07G11870				BjuVA09G08520
BjuVB03G44140		BjuVB07G42980	BjuVA05G18640				BjuVB02G14810
BjuVA04G17450		BjuVA10G25530	BjuVA08G25730				BjuVB07G28070
BjuVB01G36820		BjuVA05G18060	BjuVA09G15300				BjuVA05G04220
BjuVB06G25920		BjuVA02G44830	BjuVA09G61600				BjuVB04G14600
BjuVB02G39640		BjuVB08G13450	BjuVA01G13760				BjuVB06G10570
BjuVA09G42880		BjuVB06G18430	BjuVA09G14630				BjuVB03G49080
BjuVA04G15640		BjuVA10G19060	BjuVB05G46920				BjuVA10G23350
BjuVA09G48330		BjuV_Contig00718G00140	BjuVA09G09260				BjuVB07G17610
BjuVB01G08060		BjuV_Contig00937G00230	BjuVA07G30110				BjuVA09G41930
BjuVB05G21360		BjuVB01G37000	BjuVA02G40080				BjuVA07G24020
BjuVA06G12610		BjuVB04G49950	BjuV_Contig00654_ERROPOS300000G01050				BjuVB07G26890
BjuVA02G41610		BjuVA08G06670	BjuVB05G03670				BjuVB03G01930
BjuVB02G02590		BjuVA06G31180	BjuVB04G30450				BjuVA09G09150
BjuVB05G07100		BjuVA05G06660	BjuV_Contig00683G00510				BjuV_Contig00848G00080
BjuVB03G20610		BjuVA01G16830	BjuVA02G04910				BjuVA01G42120
BjuVA02G21690		BjuVB04G34790	BjuVA06G47790				BjuVB07G46360
BjuVA08G38240		BjuVA07G35850	BjuVA04G13260				BjuVB05G01900
BjuVB04G01290		BjuVA07G13340	BjuVB03G43480				BjuVB02G63600
BjuVA06G30560		BjuVA09G07110	BjuVB01G19730				BjuVA06G47810
BjuVB03G40890		BjuVB06G46430	BjuVB05G24280				BjuVA08G25680
BjuVA05G12270		BjuVB03G14050	BjuVB07G43050				BjuVB02G46890
BjuVB02G42080		BjuVA10G24980	BjuVB03G14670				BjuVB03G11210
BjuVA04G05270		BjuVB06G02080	BjuVB06G24270				BjuVA07G36880
BjuVA03G22840		BjuVA05G38850	BjuVB08G05260				BjuVB03G51460
BjuV_Contig00715G00290		BjuVB06G08340	BjuVB06G42050				BjuVA08G28540
BjuVB07G23110		BjuVB08G56390	BjuVA01G41330				BjuVB05G04560
BjuVB03G16500		BjuVA08G07180	BjuVB05G03860				BjuVA04G33310
BjuVA05G17760		BjuVA02G10700	BjuVB05G21820				BjuVA10G24230
BjuVB04G26140		BjuVA03G39340	BjuVA01G02400				BjuVA06G44070
BjuVA06G39610		BjuVB02G62920	BjuVA06G16550				BjuVA02G47150
BjuVA06G17810		BjuVA06G09930	BjuVA01G41090				BjuVB05G18190
BjuVA07G36520		BjuVA07G06690	BjuVA08G02180				BjuVA07G00770
BjuVA02G11650		BjuVA03G67180	BjuVA05G39010				BjuVB07G19850
BjuVB06G56220		BjuVB01G08500	BjuVB04G30500				BjuVA08G17840
BjuVA09G51610		BjuVB04G38610	BjuVA08G22860				BjuVB01G15280
BjuVB08G26370		BjuV_Contig00654_ERROPOS300000G00490	BjuVB01G26290				BjuVA03G01780
BjuVA01G14400		BjuVA07G28550	BjuVA09G49100				BjuVB07G41390
BjuV_Contig00791G00040		BjuVA05G39510	BjuVA09G04400				BjuVB06G10590
BjuVA05G34880		BjuVB08G21570	BjuVB06G10820				BjuVB02G63370
BjuVA09G06670		BjuVB07G26240	BjuVB01G43800				BjuVA03G17810
BjuVB04G03140		BjuVA05G41060	BjuVA03G59960				BjuVB05G55950
BjuVA07G32140		BjuVB03G44180	BjuVB03G05120				BjuVB01G27190
BjuVB03G05160		BjuVA03G03940	BjuVB03G28980				BjuVA03G35760
BjuVB05G50040		BjuVA02G34970	BjuVA05G07680				BjuVA09G40310
BjuVB02G64790		BjuVB08G51970	BjuVB02G32450				BjuVB07G03740
BjuVB02G35500		BjuVA06G31460	BjuVB03G05450				BjuVA02G44470
BjuVA08G36430		BjuVB07G33140	BjuVB02G27010				BjuVA07G12310
BjuVA06G30640		BjuVA01G33850	BjuVB07G19660				BjuVA05G10820
BjuVA07G31540		BjuVB04G34590	BjuV_Contig00683G00320				BjuVB06G51580
BjuVA07G03510		BjuVA07G10880	BjuVB01G00650				BjuVB02G59490
BjuVB05G52610		BjuVB02G07740	BjuVB03G14960				BjuVA10G33910
BjuVB06G36150		BjuVB06G14450	BjuVA01G34670				BjuVA02G34990
BjuVB08G44640		BjuVB02G57980	BjuVA03G34260				BjuVA06G26840
BjuVB08G49100		BjuVB01G21910	BjuVB08G24620				BjuVA08G07190
BjuVA06G41770		BjuVA04G18640	BjuVA03G45180				BjuVA10G22120
BjuVA10G31870		BjuVA09G45870	BjuVA09G33400				BjuVB06G38030
BjuVB04G35830		BjuVA10G29360	BjuVB04G18130				BjuVA07G23280
BjuVB04G14440		BjuVA03G62840	BjuVB07G48380				BjuVB03G00620
BjuVA04G31490		BjuVB06G16000	BjuVA04G07890				BjuVA07G29140
BjuVB02G60260		BjuVB06G28260	BjuVA02G10710				BjuVB03G09240
BjuVB02G73190		BjuVB01G09680	BjuVA08G21740				BjuVB03G41150
BjuVB04G14260		BjuVA02G24340	BjuVA03G39700				BjuVB03G30310
BjuVB05G46000		BjuVB07G28320	BjuVB03G53660				BjuVA01G04760
BjuVB04G06760		BjuVA09G12180	BjuVB07G30210				BjuVB05G16140
BjuVB04G16290		BjuVA01G04150	BjuVA04G00030				BjuVA09G53210
BjuVB08G47310		BjuVB08G03900	BjuVA01G14030				BjuVA09G09310
BjuVB06G32120		BjuVA05G06270	BjuVA04G12760				BjuVB04G53140
BjuVB04G22330		BjuVB02G66080	BjuVA09G40790				BjuVA01G14550
BjuVB07G24400		BjuVB02G72880	BjuVB01G35820				BjuVB05G21730
BjuVB06G57480		BjuVA06G02660	BjuVA01G01300				BjuVB07G25230
BjuVA06G45870		BjuVA09G58160	BjuVB02G63700				BjuVA09G40570
BjuVA03G59720		BjuVA07G38860	BjuVA06G12930				BjuVB07G21620
BjuVB04G17610		BjuVB03G44270	BjuVA10G04560				BjuVA07G32970
BjuVB03G11730		BjuVB03G30870	BjuVB08G02380				BjuVA03G05410
BjuVA03G13450		BjuVA03G61860	BjuVB02G45530				BjuVA03G32740
BjuVA09G08930		BjuVA10G05650	BjuVB02G46330				BjuVA05G28310
BjuVA02G06360		BjuVB01G18710	BjuVA06G46550				BjuVB01G36890
BjuVB05G54600		BjuVA09G11760	BjuV_Contig00578G00130				BjuVB07G18280
BjuVB05G53490		BjuVA09G53860	BjuVA05G00530				BjuVA10G02920
BjuVA09G21200		BjuVA09G14760	BjuVB02G71420				BjuVA09G14350
BjuVA02G24650		BjuVA09G04480	BjuVB03G33470				BjuVA05G43710
BjuVB01G20130		BjuVB08G28310	BjuVA04G25620				BjuVB08G07950
BjuVA05G01200		BjuVB01G01030	BjuVB06G11240				BjuVA10G22720
BjuVB06G01080		BjuVB06G41990	BjuVA01G16670				BjuVB01G13550
BjuVA09G00640		BjuVB07G37870	BjuVB05G33180				BjuVA01G16620
BjuVA06G35740		BjuVB01G40050	BjuVB06G15300				BjuVA04G34410
BjuVB05G55850		BjuVB06G52090	BjuVB02G12910				BjuVA03G65160
BjuVA02G12380		BjuVB02G22950	BjuVB08G57980				BjuVB02G26030
BjuVA06G15410		BjuVA09G64460	BjuVB06G56540				BjuVA03G16360
BjuVA03G38250		BjuVB02G43350	BjuVA01G21270				BjuVB06G51140
BjuVB03G02840		BjuVA02G46700	BjuVA06G27980				BjuVA05G26990
BjuVB04G37380		BjuVB03G49870	BjuVA09G08600				BjuVB02G71320
BjuVB05G05980		BjuVA01G20700	BjuVB02G03820				BjuVA09G67180
BjuV_Contig00457G00070		BjuVB06G06320	BjuVB07G34860				BjuVA09G00190
BjuVA09G37170		BjuVA06G13120	BjuVA08G06640				BjuVA03G23760
BjuVB05G50280		BjuVA03G16960	BjuVB08G34120				BjuVA09G23140
BjuVA02G47490		BjuVA03G04970	BjuVB04G03590				BjuVB07G29310
BjuVA01G40560		BjuVB04G05580	BjuVB01G11980				BjuVB05G47890
BjuVA05G08490		BjuVB03G01860	BjuVB07G40780				BjuVB03G20980
BjuVB03G17520		BjuVA02G37260	BjuVA06G27510				BjuVA06G27730
BjuVA07G18700		BjuVA08G06490	BjuVB06G51270				BjuVA06G02170
BjuVB07G21440		BjuV_Contig01058_ERROPOS1500000G00250	BjuVB01G30840				BjuVB02G67710
BjuVB03G30970		BjuVA02G49620	BjuVA07G04870				BjuVA09G06240
BjuVB03G55550		BjuVA05G16720	BjuVB04G30530				BjuVA01G18760
BjuV_Contig00792G00060		BjuVB05G39990	BjuVB06G21330				BjuVB04G21350
BjuVB06G26380		BjuVB06G08630	BjuVA02G13390				BjuVA02G40110
BjuVA07G33620		BjuVA05G03600	BjuVB04G06370				BjuVB03G15320
BjuVA06G09840		BjuVA07G29840	BjuVA10G02310				BjuVA07G32080
BjuVB04G00720		BjuV_Contig00715G00150	BjuVA05G32190				BjuVB08G10050
BjuVA07G09870		BjuVA07G41690	BjuVB07G07070				BjuVB03G33060
BjuVA02G27140		BjuVA06G03760	BjuVB06G43710				BjuVA04G30690
BjuVA08G14430		BjuVB07G05410	BjuVA01G15220				BjuVA06G16530
BjuVA06G46950		BjuVA04G04360	BjuVB03G37200				BjuVA09G00390
BjuVB07G15320		BjuVA09G68890	BjuVA07G36120				BjuVB04G24580
BjuVA08G35100		BjuVB02G68920	BjuVA09G57910				BjuVB06G00430
BjuVA09G61280		BjuVB05G38000	BjuVB08G52120				BjuVA03G52260
BjuVB08G47060		BjuVA08G17670	BjuVA10G15750				BjuVA10G26810
BjuVB05G36730		BjuVB05G29810	BjuVA09G56770				BjuVA09G07960
BjuVB05G52030		BjuVB07G31710	BjuVB04G24660				BjuVA09G33420
BjuVB08G33670		BjuVA02G38820	BjuVA09G53560				BjuVB02G76140
BjuVB01G46040		BjuVA09G66550	BjuVA08G03440				BjuVA05G08660
BjuVB08G15440		BjuVA03G52340	BjuVB01G02670				BjuVB06G18920
BjuVA09G03240		BjuVB04G41420	BjuVA07G10590				BjuVB07G06840
BjuVA07G40990		BjuVA09G04160	BjuVA09G41810				BjuVB03G35420
BjuVA03G00240		BjuVA09G07310	BjuVA10G24810				BjuVA08G04520
BjuVA02G17440		BjuVB08G39340	BjuVA02G28010				BjuVA09G18990
BjuVA02G05090		BjuVB05G21340	BjuVA09G01760				BjuVA03G56880
BjuVA09G08800		BjuVA05G33920	BjuVA05G39080				BjuVB07G39490
BjuVB04G35640		BjuVB06G55040	BjuVA09G09820				BjuV_Contig00886G00190
BjuVB05G02560		BjuVA03G45530	BjuVB01G37750				BjuVB08G49540
BjuVB02G73680		BjuVB02G24230	BjuVA08G15760				BjuVA01G03360
BjuVB05G10500		BjuVA06G04030	BjuVB03G35380				BjuVB03G42840
BjuVB02G74110		BjuVB07G09660	BjuVB02G49790				BjuVB02G65830
BjuVB05G17040		BjuVB08G19880	BjuVB06G41300				BjuVA02G08290
BjuVA08G25420		BjuVA03G62160	BjuVB07G00560				BjuVA05G10160
BjuVB06G42560		BjuVA09G48960	BjuVA09G49520				BjuVA02G01450
BjuVB02G38890		BjuVB04G04470	BjuVB01G31750				BjuVB08G19770
BjuVA10G27060		BjuVA05G26780	BjuVB04G05460				BjuVA02G02150
BjuVB04G17120		BjuVB08G02050	BjuVA07G38080				BjuVA07G31810
BjuVA10G00320		BjuVA01G39710	BjuVB04G00330				BjuVB03G36250
BjuVA08G13770		BjuVA01G39170	BjuVB02G28680				BjuVB05G34030
BjuVA05G40210		BjuVB06G11570	BjuVB03G11110				BjuVB05G56410
BjuVB04G25630		BjuVB01G12250	BjuVB01G02330				BjuVA03G59730
BjuVA02G00210		BjuVB02G75970	BjuVB06G36720				BjuVB05G13530
BjuVA01G11490		BjuVB06G35030	BjuVB01G19260				BjuV_Contig00791G00190
BjuVA01G23960		BjuVB03G58390	BjuVA05G27200				BjuVA07G10560
BjuVA01G40800		BjuVA06G31740	BjuVA02G48070				BjuVA08G25500
BjuVB03G06880		BjuVB05G21190	BjuVA02G41470				BjuVB07G08660
BjuVB04G02060		BjuVB04G28790	BjuVA02G12610				BjuVB02G45850
BjuVB05G21880		BjuVB04G25830	BjuVB02G04340				BjuVA04G22430
BjuVB02G68630		BjuVB02G70170	BjuVB05G28860				BjuVA05G34830
BjuVB03G22750		BjuVA10G11430	BjuVB05G21720				BjuVA03G16250
BjuVB05G10010		BjuVB06G13300	BjuVB03G13620				BjuVB06G21890
BjuVA08G06800		BjuVB05G30890	BjuVA03G64520				BjuVA03G62350
BjuVA07G10990		BjuVA03G30370	BjuVA03G29310				BjuVA04G30880
BjuVB08G21560		BjuVA03G27030	BjuVA10G25080				BjuVB02G01160
BjuVB06G54330		BjuVA03G49920	BjuVB04G22470				BjuVB02G09720
BjuVB03G08740		BjuVB05G36920	BjuV_Contig00925G00270				BjuVA10G23800
BjuVB05G05970		BjuVB04G40230	BjuVB03G46920				BjuVA04G24470
BjuVB01G42530		BjuVA04G01150	BjuVA09G22360				BjuVB02G56810
BjuVB04G04670		BjuVB07G19160	BjuVA09G06520				BjuVB03G36750
BjuVA07G25700		BjuVB07G42970	BjuVB08G51130				BjuVB05G10420
BjuVB02G28150		BjuVA02G26200	BjuVA06G07830				BjuVB05G32500
BjuVB05G03940		BjuVA05G37600	BjuVA10G25730				BjuVB05G00330
BjuVA09G07730		BjuVB01G42340	BjuVB02G57180				BjuVA03G64910
BjuVA01G01190		BjuVB06G19390	BjuVA10G33710				BjuVB02G37290
BjuVA03G09220		BjuVB06G04320	BjuVB02G30490				BjuVB04G39530
BjuVB03G09910		BjuVA04G17610	BjuVA02G37510				BjuVB02G48300
BjuVA02G44770		BjuVB08G29170	BjuVA06G13970				BjuVB04G19570
BjuVA10G11490		BjuVB07G23890	BjuVA10G01950				BjuVA07G19030
BjuVA10G29700		BjuVB01G24090	BjuVA01G10310				BjuVA06G13790
BjuVB02G51070		BjuVB03G18980	BjuVA05G12310				BjuVA07G26550
BjuVB04G49050		BjuVB07G49840	BjuVA08G30040				BjuVA03G05980
BjuVB06G14400		BjuVB03G41700	BjuVB03G17670				BjuVB01G47610
BjuVB02G10800		BjuVA01G17940	BjuVA05G25240				BjuVB02G37560
BjuVB03G08730		BjuVB05G51330	BjuVA02G01980				BjuVB03G12660
BjuVA05G37710		BjuVB07G31040	BjuVB04G07430				BjuVB04G03860
BjuV_Contig00937G00180		BjuVA06G28900	BjuVA03G63700				BjuVA07G33360
BjuVA08G28720		BjuVA07G07690	BjuVB01G33740				BjuVA06G42130
BjuVB04G15980		BjuVA03G20830	BjuVB07G09230				BjuVB03G20420
BjuVA07G21480		BjuVB07G06670	BjuVB08G14540				BjuVA10G20020
BjuVB04G16300		BjuVA01G43170	BjuVB07G39530				BjuVA02G22480
BjuV_Contig00909G00060		BjuVA09G03160	BjuVB05G21030				BjuVA03G31300
BjuVA03G39160		BjuVB01G28590	BjuVA08G21440				BjuVA05G07380
BjuVB06G13680		BjuVA03G45570	BjuVA08G16380				BjuVA05G21980
BjuVB07G17810		BjuVB02G33640	BjuVA03G24540				BjuVB02G64060
BjuVB08G09690		BjuVB01G07510	BjuVB05G40270				BjuVB06G33280
BjuVB07G24970		BjuVA02G07330	BjuVA07G39140				BjuVB02G72790
BjuVB07G00790		BjuVB07G07110	BjuVB05G52480				BjuVA01G21850
BjuVA03G03450		BjuVA01G44320	BjuVA05G41360				BjuVB01G21170
BjuVB07G12600		BjuVA03G28360	BjuVA03G03480				BjuVB05G09310
BjuVB05G22850		BjuVB02G57430	BjuVA06G40990				BjuVA02G14030
BjuVB03G42510		BjuVA05G05810	BjuVB02G45880				BjuVB05G15810
BjuVB06G21900		BjuV_Contig00784G00070	BjuVB05G50250				BjuVB04G32400
BjuVA02G24770		BjuVB08G50360	BjuVB02G22810				BjuVA01G24990
BjuVB01G25520		BjuVA03G34800	BjuVB08G06290				BjuVB08G49730
BjuVB05G08980		BjuVB08G31920	BjuVB01G15370				BjuVB04G42750
BjuVB08G51920		BjuVA06G37660	BjuVB03G33370				BjuVB03G48070
BjuVA03G51740		BjuVA08G14040	BjuVB02G17230				BjuVA01G32380
BjuVB06G24280		BjuVB03G48830	BjuVA08G08200				BjuVB02G47340
BjuVA07G33210		BjuVA08G24060	BjuVA08G24020				BjuVA06G42350
BjuVB08G30900		BjuVB03G23540	BjuVA03G24800				BjuVA10G08190
BjuVB03G15930		BjuVB04G51330	BjuVA06G38140				BjuVA08G06150
BjuVA01G05150		BjuVA09G15170	BjuVA06G31190				BjuVB04G41730
BjuVA07G32150		BjuVA01G31810	BjuVB05G32730				BjuVA03G51210
BjuVA09G18100		BjuVB06G12060	BjuVA08G00720				BjuVA10G26460
BjuVB02G49220		BjuVB06G47090	BjuVA03G64570				BjuVB02G75640
BjuVA02G39620		BjuVB01G32090	BjuVB08G05650				BjuVA02G36480
BjuVA07G44390		BjuVA04G22330	BjuVA03G65220				BjuVA07G07440
BjuVB02G68180		BjuVA03G21500	BjuVB01G10600				BjuVB08G57440
BjuVA09G35770		BjuVA09G07830	BjuVB03G11890				BjuVA07G36150
BjuVA06G37920		BjuVB03G31850	BjuVA09G18390				BjuVB06G10670
BjuVB05G07410		BjuVB07G15330	BjuVB01G05200				BjuVA02G32480
BjuVB06G00870		BjuVB05G11270	BjuVA06G37160				BjuVA02G42980
BjuVA06G10540		BjuVB05G05540	BjuVB05G57260				BjuVB05G54390
BjuVA02G25580		BjuVB01G00130	BjuVB02G36780				BjuVA03G11960
BjuVA09G54290		BjuVB01G35330	BjuVA06G33060				BjuVA08G34880
BjuVB05G48830		BjuVA09G46420	BjuVB05G12980				BjuVB05G00520
BjuVA09G07070		BjuVB01G35250	BjuVA09G67460				BjuVB08G52560
BjuVB04G10730		BjuVB02G05060	BjuVA01G02410				BjuVB08G11560
BjuVB07G07100		BjuVA05G06370	BjuVA07G39600				BjuVA06G37390
BjuVB05G45930		BjuVA09G11260	BjuVB01G08830				BjuVA09G53750
BjuVA06G35660		BjuVA05G12870	BjuVA01G38770				BjuVB08G36460
BjuVA08G01520		BjuVA04G08710	BjuVA09G66650				BjuVB08G18770
BjuVA01G08920		BjuVA10G33810	BjuVA02G34920				BjuVA01G20170
BjuVB03G23800		BjuVA08G36770	BjuVA01G14040				BjuVA06G01940
BjuVB05G37120		BjuVA01G07220	BjuVA02G02270				BjuVB07G11220
BjuVA04G30120		BjuVA10G23540	BjuVB05G32210				BjuVA05G36090
BjuVB05G35440		BjuVA10G11610	BjuVB01G19610				BjuVA02G43120
BjuVB08G27310		BjuVB08G14670	BjuVA07G09290				BjuVB02G50570
BjuVA07G22570		BjuVA03G60490	BjuVA05G42660				BjuVA10G16980
BjuVB05G52180		BjuVB05G08720	BjuVB02G57060				BjuVA01G18720
BjuVA06G00700		BjuVA05G00650	BjuVA08G27970				BjuVB02G10050
BjuVA09G37940		BjuV_Contig00453G00020	BjuVA03G41250				BjuVB02G72350
BjuVA01G30270		BjuVB07G46860	BjuVB07G35130				BjuVA03G13010
BjuVA07G10870		BjuVB02G22180	BjuVB03G13880				BjuVB02G48680
BjuVB02G32980		BjuVB08G16300	BjuVA07G32530				BjuVA03G05120
BjuVB04G49780		BjuVA10G08260	BjuVB01G31410				BjuVA06G38060
BjuVB01G27180		BjuVB02G57070	BjuVB07G00150				BjuVA08G20090
BjuVA07G36580		BjuVA10G34190	BjuVA08G31470				BjuVB02G72330
BjuVA09G20920		BjuVB05G02260	BjuVA09G56780				BjuVA02G47810
BjuVB03G39220		BjuVB04G07580	BjuVA07G34190				BjuVB05G24990
BjuVA02G19750		BjuVA10G17900	BjuVB01G22990				BjuVB03G38700
BjuVB04G49000		BjuVB03G28770	BjuVB08G51230				BjuVB02G40380
BjuVA09G40990		BjuVB02G23080	BjuVA09G13730				BjuVA05G26250
BjuVA10G00660		BjuVB02G07360	BjuVB08G59540				BjuVA02G00810
BjuVA02G11470		BjuVB08G56070	BjuVB01G10070				BjuVB02G16270
BjuVA01G18430		BjuVA03G54470	BjuVB03G20210				BjuVA01G40570
BjuVA03G41150		BjuVB05G39450	BjuVB02G67240				BjuVB01G17520
BjuVA07G21450		BjuVA06G19980	BjuVA06G17220				BjuVB04G36070
BjuVA03G06500		BjuVB02G45240	BjuVA08G34960				BjuVB02G15780
BjuVA10G25460		BjuVB08G34940	BjuVA04G03990				BjuVA06G09110
BjuVA06G04420		BjuVB04G46040	BjuVA06G37340				BjuVA04G28210
BjuVB03G49800		BjuVB05G40190	BjuVB02G48400				BjuVB06G58490
BjuVB04G35810		BjuVB02G38160	BjuVA10G02630				BjuVB02G75320
BjuVA03G52180		BjuVA08G27590	BjuVA04G17520				BjuVB06G42300
BjuVB03G21990		BjuVB04G21340	BjuVA04G04120				BjuVA09G22520
BjuVA06G34060		BjuVB08G34110	BjuVB01G25720				BjuVB01G23090
BjuVB05G22460		BjuVB04G21700	BjuVB02G52090				BjuVA04G02060
BjuVB08G50230		BjuVB08G26050	BjuVB02G58930				BjuVB07G28190
BjuV_Contig00458G00310		BjuVB07G23030	BjuVB04G48200				BjuVA07G41950
BjuVB08G54710		BjuVB03G02610	BjuVA02G40400				BjuVA09G61560
BjuVB02G72030		BjuVA07G35200	BjuVA09G38450				BjuVA07G29960
BjuVB06G41860		BjuVA09G59850	BjuVB08G02690				BjuVB06G16260
BjuVA03G68780		BjuVA01G22540	BjuVA09G22160				BjuVA03G11600
BjuVB04G08700		BjuVB03G08910	BjuVA07G17270				BjuVB08G51950
BjuVA03G28650		BjuVA09G01540	BjuVB02G31180				BjuVA09G10690
BjuVA09G25450		BjuVA04G20560	BjuVA03G39800				BjuVA02G17630
BjuVB04G15920		BjuVA05G06490	BjuVA09G58220				BjuVB08G03980
BjuVA07G37400		BjuVB03G02010	BjuVA10G17390				BjuVB05G28020
BjuVA09G42690		BjuVA09G00170	BjuVB04G04350				BjuVA05G22030
BjuVA09G06180		BjuVA03G45540	BjuVA04G08770				BjuVA03G60920
BjuVA07G32130		BjuVA04G18800	BjuVB02G53550				BjuVA05G08620
BjuVB06G03440		BjuVB04G20360	BjuVA02G35380				BjuVB02G31410
BjuVA02G23170		BjuVB08G24170	BjuVA07G36470				BjuVA09G64890
BjuVA07G27940		BjuVA08G28810	BjuVA03G13940				BjuVB08G55340
BjuVB06G09630		BjuVA08G21710	BjuVA08G29300				BjuVA07G22780
BjuVA07G32060		BjuVA10G21850	BjuVA09G67840				BjuVA05G41950
BjuVB07G29730		BjuVB02G07920	BjuVA09G53410				BjuVB01G48710
BjuVB04G40710		BjuVA10G18970	BjuVB06G04990				BjuVA06G41010
BjuVB02G63790		BjuV_Contig01041G00030	BjuVA01G28460				BjuVA03G26490
BjuVA03G51690		BjuVB06G24640	BjuVB03G08820				BjuVB03G23760
BjuVB04G13930		BjuVB07G13990	BjuVB06G41040				BjuVB08G25200
BjuVB07G17200		BjuVA02G43080	BjuVB01G37950				BjuVB01G28740
BjuVB01G22230		BjuVA07G22630	BjuVB08G47020				BjuVA03G10020
BjuVB06G15160		BjuVA04G20840	BjuVA08G25430				BjuVA06G00470
BjuVB02G60400		BjuVB07G00980	BjuVB05G42690				BjuVA01G23500
BjuVB07G15010		BjuVB06G38600	BjuVA04G08840				BjuVA05G12280
BjuVB04G17600		BjuVB03G33130	BjuVA02G13700				BjuVA02G11700
BjuVA01G40270		BjuVA03G00610	BjuVB02G58420				BjuVB07G05700
BjuVB05G56210		BjuVA03G15390	BjuVA07G06450				BjuVA01G11070
BjuVA08G35430		BjuVB08G36300	BjuVB02G07590				BjuVB08G08380
BjuVB02G40710		BjuVB05G59990	BjuVA05G06360				BjuVB06G09820
BjuVA01G06620		BjuVA06G12220	BjuVB01G04590				BjuVB06G11290
BjuVA04G03250		BjuVB03G03850	BjuVA02G15370				BjuVB06G53750
BjuVB06G26110		BjuVA02G47230	BjuVB06G21850				BjuVB04G41590
BjuVB06G36290		BjuVA04G25090	BjuVB08G59190				BjuV_Contig00654_ERROPOS300000G00500
BjuVB02G32810		BjuVB02G67930	BjuVA02G33800				BjuV_Contig00477G00010
BjuVB04G44520		BjuVA06G02130	BjuVB04G35500				BjuVB04G36160
BjuVA04G16070		BjuVA01G13210	BjuVB05G53290				BjuVA09G40640
BjuVB05G57850		BjuVA03G58760	BjuVA07G21470				BjuVB07G42170
BjuVA03G63400		BjuVA09G26520	BjuVB01G16290				BjuVB01G01430
BjuVA09G62980		BjuVB03G46900	BjuVB05G21580				BjuVA05G01990
BjuVA07G14920		BjuVA04G15450	BjuVB05G14580				BjuVB01G41130
BjuVB06G51310		BjuVA08G33430	BjuVA02G12630				BjuVB06G14490
BjuVA09G13720		BjuVA03G32690	BjuVB05G06960				BjuVB06G00120
BjuVA09G43320		BjuVB02G39590	BjuVB06G53350				BjuVA06G03720
BjuVA05G42540		BjuVB01G04860	BjuVB08G12000				BjuVB02G04010
BjuVA03G68510		BjuVA10G01770	BjuVB03G19700				BjuVB01G22250
BjuVA08G34100		BjuVB02G60890	BjuVA01G04800				BjuVA10G11540
BjuVA07G33740		BjuVB04G02900	BjuVA08G24980				BjuVA02G13820
BjuVB04G25700		BjuV_Contig00718G00180	BjuVB05G02320				BjuVA09G35300
BjuVB06G08030		BjuVB01G42630	BjuVB04G12320				BjuVB08G40340
BjuVA01G17700		BjuVA10G33690	BjuVB07G41010				BjuVB08G22320
BjuVA04G31460		BjuVA03G32680	BjuVA07G19730				BjuVB08G44080
BjuVA08G27190		BjuVB06G38230	BjuVA10G08160				BjuVB05G18100
BjuVA09G26150		BjuVA04G20280	BjuVA01G12360				BjuVA03G11580
BjuVB03G39480		BjuVA03G25970	BjuVB06G57110				BjuVA05G43690
BjuVA01G10610		BjuVB01G41400	BjuVB06G49020				BjuVA05G11150
BjuVB04G22240		BjuVB06G05540	BjuVB05G45610				BjuVB05G41750
BjuVB06G40940		BjuVA04G08790	BjuVA03G19930				BjuVB04G34690
BjuVA03G10580		BjuVA02G33200	BjuVA09G43280				BjuVA09G13330
BjuVA02G46000		BjuVA05G02510	BjuVB06G28560				BjuVB06G11940
BjuVB07G06810		BjuVA09G68540	BjuVB08G39390				BjuVB05G09950
BjuVA01G42930		BjuVA05G03500	BjuVA04G20810				BjuVB06G52940
BjuVA06G32720		BjuVA05G11220	BjuVB03G37660				BjuVA09G22530
BjuVA06G01390		BjuVB03G21510	BjuVA03G26920				BjuVA05G11010
BjuVB02G73250		BjuV_Contig00784G00170	BjuVB02G73480				BjuVA01G20360
BjuVB08G02390		BjuVA04G33150	BjuVA09G03860				BjuVA04G25370
BjuVA07G44630		BjuVB02G50990	BjuVB01G18460				BjuVA02G23400
BjuVB02G05940		BjuVA05G35760	BjuVA03G29080				BjuVA09G38700
BjuVB01G37130		BjuVA03G32440	BjuVA03G49730				BjuVB04G12430
BjuVA10G23270		BjuVA07G39960	BjuVB02G13050				BjuVB08G48030
BjuVA03G49870		BjuVA09G20070	BjuVA01G19520				BjuVB03G29360
BjuVB04G52320		BjuVA06G05100	BjuVA05G09690				BjuVB07G45420
BjuVB03G08450		BjuVA02G14200	BjuVB02G00900				BjuVB06G39670
BjuVB07G30060		BjuVB05G28330	BjuVB06G17640				BjuVB08G18970
BjuVB02G73760		BjuVB06G21560	BjuVB07G14080				BjuVA06G47700
BjuVB03G48440		BjuVA05G11210	BjuVB03G49690				BjuVA03G58320
BjuVB06G57560		BjuVA03G20690	BjuVB02G22790				BjuVA01G30720
BjuVB05G51840		BjuVA05G05160	BjuVA01G04260				BjuVA08G04060
BjuVA06G22620		BjuVB08G35630	BjuVB06G46050				BjuVB06G05780
BjuVA07G22610		BjuVB07G02120	BjuVB06G02220				BjuVB02G11420
BjuVB06G25010		BjuVA10G08300	BjuVB02G54360				BjuVA02G04290
BjuVB07G21010		BjuVB06G06130	BjuVB01G46100
BjuVB03G33600		BjuVA07G42860	BjuVB03G00690
BjuVA05G12120		BjuVB02G52170	BjuVA10G19490
BjuVA09G50350		BjuVA05G04190	BjuVB04G38450
BjuVA07G03690		BjuVA10G32870	BjuVA03G06760
BjuVA07G31190		BjuVB02G19730	BjuVA01G42100
BjuV_Contig00578G00060		BjuVB06G47910	BjuVB05G18030
BjuVA03G62960		BjuVA06G01880	BjuVA10G32980
BjuVA04G01100		BjuV_Contig01041G00060	BjuVA06G40930
BjuVB07G06730		BjuVA03G57410	BjuVA01G03480
BjuVA04G02380		BjuVB07G31050	BjuVA07G19350
BjuVB03G19080		BjuVA04G05390	BjuVB05G40510
BjuVA06G32280		BjuVA05G07580	BjuVA09G34430
BjuVA07G34810		BjuVA06G19800	BjuVB01G14910
BjuVA05G05970		BjuVB01G31120	BjuVA07G15830
BjuVA08G12820		BjuVA05G15060	BjuVA09G05960
BjuVA08G11000		BjuVA10G05360	BjuVB01G03900
BjuVB04G33760		BjuV_Contig00654_ERROPOS300000G01220	BjuVB03G10570
BjuVB03G08670		BjuVB05G37520	BjuVB02G58700
BjuVA09G62440		BjuVB01G36380	BjuVA03G54740
BjuVB02G37960		BjuVA04G18990	BjuVA09G44990
BjuVB06G11730		BjuVB05G20350	BjuVB02G27460
BjuVB02G62350		BjuVB03G37900	BjuVA02G20240
BjuVA03G21800		BjuVB06G16830	BjuVA09G05810
BjuVB07G19500		BjuVA03G45550	BjuVA02G04760
BjuVB02G23310		BjuVA03G20580	BjuVA09G39960
BjuVA04G31250		BjuVA05G29550	BjuVB05G40700
BjuVA07G03220		BjuVB05G54440	BjuVB02G41620
BjuVB01G42450		BjuVB07G19260	BjuVA07G27480
BjuV_Contig00683G00550		BjuVB07G32200	BjuV_Contig00551G00140
BjuVA03G20860		BjuVA08G13900	BjuVA09G52020
BjuVA07G35100		BjuVB04G16080	BjuVB01G08970
BjuVB03G35310		BjuVA09G58200	BjuVB03G36400
BjuVB02G04120		BjuVA09G36740	BjuVB02G73660
BjuVA01G29200		BjuVB02G64310	BjuVA05G03310
BjuVB08G11310		BjuVA05G18200	BjuVA03G01240
BjuV_Contig00683G00780		BjuVA06G34470	BjuVA08G31930
BjuVB06G10940		BjuVA05G42600	BjuVB05G44120
BjuVB02G72950		BjuVA08G24710	BjuVB01G14780
BjuVB02G66510		BjuVA06G28820	BjuV_Contig00654_ERROPOS300000G01040
BjuVB02G52720		BjuVA09G42190	BjuVB06G08190
BjuVA03G52850		BjuVA10G04380	BjuVA05G36590
BjuVB06G44700		BjuVA05G25480	BjuVB01G13580
BjuVA07G17210		BjuVB05G37810	BjuVA09G10290
BjuVA05G15690		BjuVB06G43260	BjuVB08G05540
BjuVB04G28400		BjuVA01G31590	BjuVA09G39840
BjuVA06G13210		BjuVA04G10640	BjuVA02G11560
BjuVB02G63650		BjuVA01G15960	BjuVA01G40520
BjuVB08G18470		BjuVB02G71480	BjuVA09G43440
BjuVA09G37870		BjuVA10G03760	BjuVB03G35810
BjuVA09G50000		BjuVB04G42590	BjuVB07G20200
BjuVB08G17050		BjuVB08G37360	BjuV_Contig00855G00190
BjuVB05G35210		BjuVB06G08670	BjuVB03G32500
BjuVA02G21610		BjuVA03G24370	BjuVB06G41930
BjuVA05G44270		BjuVB03G43750	BjuVA02G47460
BjuV_Contig00830G00180		BjuVA07G38560	BjuVB08G32030
BjuVA08G16190		BjuVA10G20280	BjuVB04G13890
BjuVB04G53070		BjuVB02G59090	BjuVB08G37000
BjuVB02G61530		BjuVA01G14630	BjuVB06G07420
BjuVB02G71330		BjuVB03G03290	BjuVB03G20120
BjuVB08G02400		BjuVA05G02670	BjuVB04G52960
BjuVB03G37600		BjuVB02G00350	BjuVA08G02890
BjuVA07G37800		BjuVA05G25870	BjuVA09G00280
BjuVB04G11050		BjuVA09G67410	BjuVB06G43070
BjuVB03G33080		BjuVB03G17860	BjuVA06G03530
BjuVA10G06210		BjuVA01G35540	BjuVA09G40840
BjuVB04G06790		BjuVB01G01830	BjuVB05G09730
BjuVA08G30260		BjuVA03G54050	BjuVB01G14840
BjuVB06G11700		BjuVB06G05410	BjuVA10G34220
BjuVA09G41080		BjuVA08G17510	BjuVB07G19840
BjuVB01G02460		BjuVB07G09590	BjuVB01G26880
BjuVA09G13870		BjuVA01G34470	BjuVA08G27450
BjuVB04G36720		BjuVB01G45350	BjuVA05G00350
BjuVA07G15990		BjuVB03G32450	BjuVB07G35530
BjuVA05G01930		BjuVA06G38640	BjuVA05G42800
BjuVA05G43570		BjuVB01G28430	BjuVA03G03680
BjuVA07G16610		BjuVA03G01880	BjuVA07G42580
BjuVB08G33980		BjuVA03G28410	BjuVB06G49540
BjuVB04G04660		BjuV_Contig00907G00340	BjuVA06G29370
BjuVB04G09460		BjuVA03G11660	BjuVB06G33260
BjuVA04G20880		BjuVA03G09840	BjuVA08G31510
BjuVB04G00390		BjuVA06G12800	BjuVB08G38840
BjuVB02G71840		BjuVB05G47800	BjuVB02G53800
BjuVA02G35460		BjuVB06G48130	BjuVA01G10920
BjuVA04G10780		BjuVA05G26680	BjuVA05G35300
BjuVB08G32090		BjuVB08G44480	BjuVB03G13130
BjuVB07G46220		BjuVA05G34770	BjuVA09G13230
BjuVB07G08180		BjuVA08G34530	BjuVA03G58690
BjuVA03G59270		BjuVA06G07690	BjuVA01G36780
BjuVA05G07500		BjuVA05G20340	BjuVB03G38090
BjuVA01G26500		BjuVA08G22470	BjuVB03G32920
BjuVB07G13480		BjuVA10G09480	BjuVA08G32200
BjuVA02G16540		BjuVB05G05510	BjuVB08G00650
BjuVA10G31310		BjuVB06G00650	BjuVA09G25610
BjuVB08G51700		BjuVB04G48940	BjuVA08G22950
BjuVA02G25560		BjuVB08G16520	BjuVB04G29400
BjuVA03G60100		BjuVB03G54300	BjuVB02G70190
BjuVA02G06730		BjuVB01G16620	BjuVA09G01430
BjuVB05G18090		BjuVB03G29500	BjuVA06G02760
BjuVB01G08660		BjuVB05G47020	BjuVA04G26950
BjuVB04G21640		BjuVB04G38760	BjuVB08G09890
BjuVB04G01210		BjuVA07G02560	BjuVA09G27020
BjuVA05G36120		BjuVB05G55710	BjuVB04G32140
BjuVA08G29640		BjuVB08G35550	BjuVA06G41880
BjuVB04G15700		BjuVB06G38730
BjuVA09G61690		BjuVB04G12930
BjuVA03G63090		BjuVA06G08010
BjuVB02G00180		BjuVA09G55040
BjuVA07G01040		BjuVB03G22600
BjuVB08G49670		BjuVA08G00830
BjuVA08G06850		BjuVB04G21770
BjuVA02G13550		BjuVB06G06310
BjuVA08G28920		BjuVB04G21160
BjuVB07G16480		BjuVA03G08210
BjuVA03G02690		BjuVB08G10320
BjuVB02G32310		BjuVA03G19850
BjuVB01G26860		BjuVB05G47500
BjuVA01G03050		BjuVB08G41730
BjuVA05G12330		BjuVA06G13730
BjuVA05G21720		BjuVA09G01770
BjuVA07G15840		BjuVA06G46710
BjuVA09G23720		BjuVA03G30160
BjuVB02G61030		BjuVA05G31210
BjuVB02G29590		BjuVA08G36490
BjuVA08G31250		BjuVB07G07410
BjuVB04G53360		BjuVA07G34600
BjuVA01G07280		BjuVA01G20320
BjuVA05G31730		BjuVA05G12900
BjuVA09G56350		BjuVA09G22480
BjuVA02G30580		BjuVA04G25740
BjuVB01G10390		BjuVA06G06890
BjuVA06G02370		BjuVA03G02530
BjuVA07G31780		BjuVA07G43200
BjuVB05G13680		BjuVA10G06750
BjuVA02G06800		BjuVB05G03010
BjuVA02G27110		BjuVB01G45020
BjuVA03G53510		BjuVA02G39740
BjuVA01G19180		BjuVA04G14880
BjuVB02G57640		BjuVA06G06160
BjuVA01G04060		BjuVB03G26980
BjuVB07G28970		BjuVB05G60150
BjuVA07G40310		BjuVA03G46230
BjuVA02G10360		BjuVB04G53160
BjuVA03G12880		BjuVA06G21040
BjuVA07G38370		BjuVA05G00740
BjuVA03G15290		BjuVB05G30450
BjuVA09G67490		BjuVA09G19960
BjuVA07G01470		BjuVA06G37740
BjuVA04G31730		BjuVA05G16150
BjuVB04G19360		BjuVB07G12910
BjuVA01G12000		BjuVB02G32640
BjuVA07G00890		BjuVA02G15580
BjuVB06G13000		BjuVB03G29310
BjuVB02G70800		BjuVA03G60240
BjuVB04G46020		BjuVB06G50520
BjuVA06G41280		BjuVA02G44230
BjuVB07G00680		BjuVB05G17430
BjuVB03G20220		BjuVB08G09900
BjuVA05G30070		BjuVA01G01560
BjuVA09G03220		BjuVB08G16760
BjuVB03G59120		BjuVB04G06240
BjuVA06G39160		BjuVA05G00480
BjuVA05G07160		BjuVB08G13930
BjuVA07G34700		BjuVB08G10410
BjuVA03G59310		BjuVA05G02610
BjuVB06G45880		BjuVA09G32020
BjuVA10G06100		BjuVA07G38870
BjuVB03G23840		BjuVA10G13350
BjuVB04G30570		BjuVA05G19830
BjuVA08G36420		BjuV_Contig00265G00320
BjuVA10G32440		BjuVB07G18320
BjuVB04G07970		BjuVA08G16550
BjuVA06G02470		BjuVA03G24890
BjuVA02G13130		BjuVA09G01400
BjuVB02G45470		BjuVB06G50730
BjuVB05G34110		BjuVB08G03060
BjuVA01G43190		BjuVA09G39130
BjuVB06G06050		BjuVA08G37970
BjuVB02G47460		BjuVB05G03890
BjuVA03G25160		BjuVA05G20310
BjuV_Contig00654_ERROPOS300000G01430		BjuVA09G47130
BjuVA07G38420		BjuVA08G24690
BjuVA07G37330		BjuVA02G46540
BjuVA03G01740		BjuVB08G29850
BjuVA06G48260		BjuVB05G17860
BjuVA09G58730		BjuVB03G34160
BjuVA02G41170		BjuVA03G65500
BjuVA04G22930		BjuVA09G04910
BjuVB05G06360		BjuVB01G13270
BjuVA09G40900		BjuVA08G11280
BjuVB08G52170		BjuVB07G31070
BjuVA06G42980		BjuVA03G31440
BjuVB07G02480		BjuVB08G12200
BjuVB06G33570		BjuVB06G39750
BjuVA02G35290		BjuVA05G27410
BjuVB04G01310		BjuVB03G55490
BjuVA09G16990		BjuVA07G08520
BjuVB05G39040		BjuVA07G16000
BjuVA07G26620		BjuVA06G02180
BjuVA09G00540		BjuVA08G34930
BjuVA06G41780		BjuVA08G02390
BjuVA08G14390		BjuVA06G28730
BjuVA02G42140		BjuVB01G20870
BjuVA09G18960		BjuVB06G39270
BjuVB03G47760		BjuVB08G07630
BjuV_Contig01019_ERROPOS2684367G00080		BjuVA01G07960
BjuVB03G56050		BjuVB08G14880
BjuVB03G19360		BjuVA09G33920
BjuVB06G46310		BjuVB01G17270
BjuVB02G41700		BjuVB05G13850
BjuVA07G11570		BjuVB01G39540
BjuVA08G34050		BjuVB03G52460
BjuVB02G72020		BjuVB01G11780
BjuVB03G11480		BjuVB03G04460
BjuVA09G09630		BjuVB03G38960
BjuVB01G18170		BjuVA05G18040
BjuVA06G19640		BjuVB04G26880
BjuVA07G40770		BjuVB02G46720
BjuVB03G04730		BjuVB03G40270
BjuVA01G25120		BjuVB03G46340
BjuVA09G51060		BjuVA04G16140
BjuVB04G01030		BjuVB05G08870
BjuVA07G22200		BjuVA08G03100
BjuVB04G12030		BjuVA05G11650
BjuVB05G29730		BjuVB05G47680
BjuVA01G25930		BjuVB04G26700
BjuVB01G01160		BjuVB02G51350
BjuVA05G06690		BjuVB05G43450
BjuVA10G20800		BjuVA02G47930
BjuVA06G19790		BjuVB04G16060
BjuVA10G24100		BjuVA03G53690
BjuVB02G22430		BjuVA03G05990
BjuVA06G30380		BjuVA09G47770
BjuVB02G63810		BjuVA01G40320
BjuVA06G02070		BjuVA09G06570
BjuVA06G46000		BjuVB08G16570
BjuVB02G50900		BjuVB08G25760
BjuVA07G37360		BjuVB01G42950
BjuVA01G14980		BjuVB03G54750
BjuVA02G29430		BjuVB03G50950
BjuVA09G03370		BjuVB01G17670
BjuVA04G10270		BjuVB02G45990
BjuVB02G55200		BjuVA09G36460
BjuVA03G16470		BjuVA03G07050
BjuVA01G14910		BjuVB06G50170
BjuVB08G56290		BjuVA05G04090
BjuVA04G27900		BjuVB02G59260
BjuVB02G29940		BjuVB04G37990
BjuVB03G36260		BjuVB05G42190
BjuVA06G29630		BjuVA08G19990
BjuVA09G28080		BjuVB01G47550
BjuVB06G17190		BjuVB02G53870
BjuVB04G35770		BjuVA03G08620
BjuVA07G16280		BjuVA06G16200
BjuVA09G45750		BjuVB05G18420
BjuVB04G39680		BjuVA04G23520
BjuVB06G01260		BjuVB02G01140
BjuVB08G44220		BjuVB07G11380
BjuVB05G11010		BjuVB07G06990
BjuVA03G05830		BjuVB02G69690
BjuVA08G30290		BjuVB03G46290
BjuVB03G19520		BjuVA03G11770
BjuVA07G29480		BjuVB03G25040
BjuVB03G36530		BjuVB03G15070
BjuVB01G17160		BjuVB04G16980
BjuVA04G20540		BjuVA06G48120
BjuVB05G36480		BjuVB02G36590
BjuVB03G13100		BjuVB08G18540
BjuVB02G00440		BjuVB04G23840
BjuVB07G20330		BjuVB02G25190
BjuVB04G36910		BjuVB01G41760
BjuVB01G42430		BjuVA07G34260
BjuVB07G06930		BjuVB05G00180
BjuVA05G02780		BjuVA01G35150
BjuVB04G11200		BjuVB06G00460
BjuVA05G01690		BjuVA10G16470
BjuVA01G34700		BjuVB01G24910
BjuVA07G18290		BjuVB08G33400
BjuVB03G09200		BjuVB05G13770
BjuVA03G07420		BjuVB06G54750
BjuVB03G01060		BjuVA05G39000
BjuVA09G04970		BjuVA02G05440
BjuV_Contig00654_ERROPOS300000G00520		BjuVA01G16900
BjuVB06G54260		BjuVB02G38640
BjuVA09G42640		BjuVB06G53660
BjuVA03G38610		BjuVB04G05490
BjuVA03G37320		BjuVB01G34840
BjuVA01G40390		BjuVB06G23280
BjuVB08G58890		BjuVB02G62200
BjuVB02G31400		BjuVB08G05480
BjuVB04G31330		BjuVB05G54070
BjuVA05G02070		BjuVA03G59480
BjuVA09G46850		BjuVB07G48230
BjuVB03G23250		BjuVB07G28480
BjuVA03G41050		BjuVA05G42330
BjuVB02G58750		BjuVA09G55530
BjuVA05G23620		BjuVA04G13800
BjuVB02G29930		BjuVA10G20970
BjuVB02G29540		BjuVB06G08760
BjuVB04G05640		BjuVA05G15180
BjuVB05G13980		BjuVA08G23730
BjuVB02G60570		BjuVB02G24280
BjuVB04G38150		BjuVB05G33610
BjuVB06G00960		BjuVA08G16120
BjuVA05G01260		BjuVB01G13330
BjuVB04G48520		BjuVA09G14330
BjuVA04G07280		BjuVA08G20010
BjuVB05G25300		BjuVA05G18400
		BjuVA06G03860
		BjuVA04G14500
		BjuVB03G06700
		BjuVB03G20900
		BjuVA10G05340
		BjuVB07G28590
		BjuVB08G00510
		BjuVA09G01280
		BjuVB01G14410
		BjuVA02G43780
		BjuVB08G48480
		BjuVA09G35030
		BjuVA10G26750
		BjuVB04G18810
		BjuVA09G66230
		BjuVA05G04660
		BjuVA02G43370
		BjuVA10G07070
		BjuVA10G11890
		BjuVB07G05740
		BjuVA01G35140
		BjuVA05G15460
		BjuVA08G20350
		BjuVB02G58500
		BjuVA01G24050
		BjuVB02G17830
		BjuVA04G11760
		BjuVA04G31180
		BjuVB02G13500
		BjuVA09G06980
		BjuVA02G14300
		BjuVB03G18730
		BjuVB06G52490
		BjuVA09G06660
		BjuVB08G22000
		BjuVB02G35550
		BjuVB08G49910
		BjuVA05G14350
		BjuVA05G24360
		BjuVB07G39760
		BjuVB06G02290
		BjuVA03G11730
		BjuVA10G03180
		BjuVA04G22020
		BjuVA06G03810
		BjuVA06G02720
		BjuVA03G64580
		BjuVB06G25170
		BjuVA05G00580
		BjuVB03G07500
		BjuVB08G19870
		BjuVA01G18740
		BjuVB01G41140
		BjuVB01G04020
		BjuVA04G33550
		BjuVB06G13250
		BjuVA04G00720
		BjuVA03G46510
		BjuVA03G38440
		BjuVA03G32360
		BjuVA04G03410
		BjuVA09G06060
		BjuVA03G11510
		BjuVB01G21330
		BjuVA03G51990
		BjuVB02G63270
		BjuVA03G24740
		BjuVA03G47600
		BjuVB02G35770
		BjuVB02G38710
		BjuVA03G42930
		BjuVA02G07120
		BjuVA06G36980
		BjuVA04G20340
		BjuVB02G42510
		BjuVB05G36500
		BjuVA03G09540
		BjuVA10G19610
		BjuVA04G15440
		BjuVB04G41610
		BjuVA03G20730
		BjuV_Contig00886G00040
		BjuVB02G09680
		BjuVA01G17240
		BjuVA06G39600
		BjuVA01G29190
		BjuVA01G14320
		BjuVA09G08020
		BjuVB05G05100
		BjuVB04G49910
		BjuVA03G23240
		BjuVB04G22390
		BjuVB03G16390
		BjuVB08G27820
		BjuVB03G25780
		BjuVA08G20550
		BjuVA03G26680
		BjuVA05G44380
		BjuVB02G09600
		BjuVA07G28450
		BjuVA03G37760
		BjuVB04G02680
		BjuVA09G09340
		BjuVA05G16770
		BjuVA07G21790
		BjuVB04G07770
		BjuVB01G35440
		BjuVA03G59760
		BjuVA04G11300
		BjuV_Contig00947G00030
		BjuVB03G54880
		BjuVA03G57370
		BjuVA09G23220
		BjuVB08G12340
		BjuVA08G24830
		BjuVB05G21450
		BjuVA09G09850
		BjuVB04G17650
		BjuVA04G00420
		BjuVA03G14920
		BjuVA05G15870
		BjuVB06G33910
		BjuVA05G31880
		BjuVB07G41460
		BjuVB01G22260
		BjuVB05G30370
		BjuVA08G27480
		BjuVA05G29440
		BjuVB04G50300
		BjuVB03G17600
		BjuVB03G50270
		BjuVA02G00600
		BjuVA05G03620
		BjuVA02G04540
		BjuVB04G07190
		BjuVB08G10020
		BjuVA03G22360
		BjuVB07G19460
		BjuVA06G14650
		BjuVB06G27710
		BjuVA03G43160
		BjuVA06G14770
		BjuVB05G14130
		BjuVA04G13410
		BjuVB03G12850
		BjuVB01G23980
		BjuVB03G05170
		BjuVB03G49170
		BjuVA05G33850
		BjuVB04G30760
		BjuVB07G37330
		BjuVA07G40210
		BjuVB07G05310
		BjuVB07G06040
		BjuVB05G14220
		BjuVB05G32230
		BjuVB07G06430
		BjuVB07G16250
		BjuVA07G42320
		BjuVB07G35020
		BjuVB02G03220
		BjuVB08G22850
		BjuVB03G41450
		BjuVB04G26320
		BjuVB04G21520
		BjuVB02G72380
		BjuVA09G19200
		BjuVB08G01850
		BjuVB07G21750
		BjuVA04G14450
		BjuVB04G01400
		BjuVB07G44560
		BjuVB06G48580
		BjuVA09G58690
		BjuVB06G19280
		BjuVA04G20590
		BjuVB02G20530
		BjuVA01G43330
		BjuVB06G40310
		BjuVB08G44050
		BjuVA04G21370
		BjuVB07G22060
		BjuVA03G34380
		BjuVA01G35260
		BjuVB05G54590
		BjuVA03G22180
		BjuVB01G33280
		BjuVA10G25360
		BjuVB06G05770
		BjuVB04G48450
		BjuVA03G10150
		BjuVB05G06330
		BjuVB05G35690
		BjuVB01G08950
		BjuVA02G15710
		BjuVA01G01100
		BjuVA09G58850
		BjuVA06G28620
		BjuVA08G16010
		BjuVB03G00110
		BjuVB08G14420
		BjuV_Contig00508G00020
		BjuVA01G44370
		BjuVB08G19570
		BjuVB01G10460
		BjuVA06G46850
		BjuVA07G12680
		BjuVB01G41670
		BjuVB02G28640
		BjuVA03G18630
		BjuVB07G42290
		BjuVB02G39830
		BjuVA03G43150
		BjuVA03G19050
		BjuVA03G16600
		BjuVB08G49300
		BjuVA09G15420
		BjuVB03G28630
		BjuVA07G17720
