# Supplementary material for: Transcriptome Dynamics of Brassica juncea Leaves in Response to Omnivorous Beet Armyworm (Spodoptera exigua, Hübner)
Source: Int J Mol Sci. 2023 Nov 24;24(23):16690. doi: 10.3390/ijms242316690 (PMC10706706; doi:10.3390/ijms242316690)
Supplement: Supplementary file 1 [file ijms-24-16690-s001.zip › Table S5.xlsx]

## Sheet: Sheet1
Table S5. The expression of all individual genes assigned to each cluster.
ID	Cluster	FPKM
		CK	1 h	24 h	48 h	72 h
BjuVA03G26070	1	45.9549	8.72333	57.5707	72.8767	60.5888
BjuVA01G18630	1	21.3232	6.54726	31.9539	39.8096	40.1257
BjuVB02G61180	1	49.3804	19.5881	99.1362	96.3646	81.6094
BjuVA10G23730	1	43.6436	17.1377	84.9749	62.0335	70.3839
BjuVB02G00190	1	4.15039	0.658655	9.90253	15.6724	13.1483
BjuVB06G07350	1	52.529	20.3195	96.5053	92.9293	93.2665
BjuVB04G26270	1	11.1747	3.30938	17.754	24.2373	19.8944
BjuVA10G27550	1	13.4284	4.55026	19.4321	17.806	16.666
BjuV_Contig00715G00290	1	14.6613	5.5724	21.9732	17.6305	20.9867
BjuVA05G17760	1	14.0263	5.1408	20.6024	28.2201	21.4905
BjuVB04G37380	1	6.28271	1.30254	4.36656	6.24796	6.58942
BjuVB08G15440	1	19.5196	7.6952	28.7069	35.699	24.5451
BjuVB04G02060	1	13.0406	5.13665	13.2562	16.3697	16.7452
BjuVA05G37710	1	13.5045	5.27956	18.7936	21.0186	20.9206
BjuVA07G36580	1	12.2913	3.67835	18.615	27.7515	28.4541
BjuVA03G41150	1	9.30482	2.74007	15.0139	18.1361	18.0482
BjuVB02G72030	1	10.9754	4.89295	10.8687	11.7344	12.1689
BjuVA09G06180	1	7.63852	3.29721	9.77659	9.08748	9.96534
BjuVA07G27940	1	28.5853	13.4081	38.2276	36.0437	37.9937
BjuVA03G51690	1	14.4695	5.70079	19.857	17.3492	20.7629
BjuVB06G08030	1	11.5573	5.29906	14.6572	13.3889	13.6893
BjuVB07G30060	1	12.0642	4.25186	10.5727	19.521	15.4014
BjuVA07G01470	1	5.76076	2.61579	7.75708	8.5913	8.50493
BjuVA08G19880	1	0.180318	6.00666	70.8568	101.748	69.7034
BjuVA09G45750	1	56.3001	11.3161	124.656	134.942	101.509
BjuVA09G60250	1	14.2295	18.1014	58.7751	71.4723	53.6012
BjuVA07G43920	1	20.7891	10.6678	67.0113	127.164	79.6925
BjuVB06G15320	1	0.358737	1.03074	4.87186	9.8407	6.05439
BjuVA02G47540	1	0.774724	0.787062	4.95099	10.1119	7.94031
BjuVB07G15580	1	13.1893	7.62371	36.1714	53.2174	46.773
BjuVB05G18580	1	3.31706	5.12086	10.8414	14.2332	10.8668
BjuVB04G29700	1	1.45603	0.988518	4.96064	6.68297	4.41417
BjuVB01G48440	1	12.4039	12.3045	26.8793	43.6993	35.1118
BjuVA02G09310	1	8.44794	4.3097	23.9697	44.8177	35.2058
BjuVA04G26570	1	1.02628	0.238975	4.18014	4.57853	3.05783
BjuVA10G18480	1	13.982	15.7546	29.1993	34.0276	25.2218
BjuVB07G02470	1	16.6004	14.5304	27.1553	46.6563	39.3947
BjuVA07G25460	1	7.48973	3.79371	10.1951	26.5182	24.4202
BjuVA05G09350	1	2.11398	2.99567	5.40822	10.2817	8.97484
BjuVB08G34020	1	5.80717	3.7665	9.71817	20.0399	17.1293
BjuVA03G04100	1	1.20987	0.356901	3.3423	6.4799	4.35998
BjuVA03G16450	1	1.14838	0.347554	4.76186	7.25762	6.1509
BjuVA06G09820	1	6.73531	5.88723	10.5317	21.8373	20.6407
BjuVB03G09390	1	2.32906	1.39815	3.92448	8.73763	5.99866
BjuVA09G46040	1	12.5103	9.21977	16.4211	30.7512	25.0942
BjuVB02G54970	1	9.66274	8.95076	17.0895	23.1684	22.3344
BjuVA02G28290	1	4.31193	1.94051	8.46531	14.1355	9.82029
BjuVA03G03620	1	10.8593	6.08518	14.6139	32.1635	30.1407
BjuVB02G65910	1	2.19707	2.00596	4.22136	6.74484	5.08977
BjuVA02G26470	1	24.3436	17.4744	41.1335	55.9856	49.183
BjuVB06G34360	1	4.11022	2.95596	6.08653	12.2819	11.519
BjuVA05G02330	1	6.43022	5.48639	8.79591	15.9463	13.7103
BjuVB04G49940	1	2.80936	3.63556	4.90424	8.05281	7.56998
BjuVB04G08900	1	3.75286	2.7941	4.57516	10.1659	10.5104
BjuVA05G12100	1	2.03209	0.942212	2.47339	7.10893	5.09141
BjuV_Contig00909G00130	1	2.97643	2.17143	3.02667	8.28674	8.3007
BjuVB05G14790	1	24.9837	19.5758	40.2932	64.1151	68.0137
BjuVB01G42860	1	5.68048	4.08213	7.60096	13.8585	10.4762
BjuVA05G04520	1	25.5151	12.708	38.4935	51.8432	42.3168
BjuVA02G24280	1	0	0.0607896	0.48655	1.46974	1.42141
BjuVA03G13580	1	4.05183	4.06325	5.96118	8.81499	8.14958
BjuVB07G25070	1	8.1483	5.8183	13.5463	20.451	16.9983
BjuVB06G37790	1	1.41626	1.07382	2.49707	4.59443	4.24854
BjuVB07G11850	1	4.24878	4.15481	3.53016	8.57125	8.73733
BjuVB02G21910	1	2.46745	2.62808	2.73861	6.1025	6.33488
BjuVB02G03080	1	21.3443	17.0308	24.5122	44.4462	37.9546
BjuVA09G27280	1	6.57782	3.14565	12.1004	16.9493	18.364
BjuVB04G01340	1	3.05184	4.43693	6.04796	8.65011	8.07515
BjuVA05G43840	1	0.23044	0.169219	0.274111	1.58684	1.55923
BjuVB04G08040	1	2.21582	1.44353	6.28517	5.72069	3.96084
BjuVA07G03850	1	13.4189	7.1448	17.9025	26.9524	25.7552
BjuVB03G38700	1	1.11	0.0936315	0.110818	0	0
BjuVA09G41640	1	4.3437	5.0528	5.126	10.507	9.82567
BjuVB04G48560	1	5.28662	3.26892	5.33677	14.0511	11.1033
BjuVB06G13450	1	5.55399	3.05139	5.28089	11.7517	12.5631
BjuV_Contig00303G00220	1	0.64991	0.0961874	2.37	3.07685	1.74901
BjuVB01G03380	1	0.725761	0.623877	1.45999	2.40793	1.73388
BjuVB03G18880	1	1.28613	1.49622	1.82179	3.26214	3.1507
BjuVB02G52940	1	2.32129	2.09696	2.28073	5.48444	5.38003
BjuVA04G30310	1	0.782493	0.513956	1.99129	3.13304	3.30847
BjuVB03G00300	1	0.291281	0.298675	0.568688	1.60078	1.70027
BjuVA09G11010	1	2.555	1.34595	5.55075	7.66552	7.9267
BjuVB04G43190	1	0.0208813	0.0179262	0.0291287	0.268065	0.245862
BjuV_Contig00017G00090	1	2.10299	1.89139	3.25139	5.3738	4.95269
BjuVA05G17950	1	2.94635	2.56787	3.46074	5.9637	6.28545
BjuVA09G28600	1	4.84128	3.57841	6.5574	9.86329	10.4639
BjuVB05G47830	1	3.95314	4.89886	6.32304	9.06844	8.15012
BjuVB07G02730	1	2.85492	3.34839	5.06734	6.07655	6.37398
BjuVA07G37120	1	1.25605	0.744258	2.24117	2.73493	3.13881
BjuVA08G10620	1	0	0.091538	0.180764	2.92611	2.47978
BjuVA09G07180	1	5.82761	6.55879	7.30265	28.1385	23.0126
BjuVB05G46380	1	7.15012	6.22983	10.3818	14.2145	15.5986
BjuVB03G47080	1	31.1603	4.65008	36.9186	35.9921	40.4206
BjuVB08G54240	1	39.828	11.4332	69.7324	91.2999	66.0435
BjuVA09G65410	1	156.723	42.8307	181.409	165.096	200.623
BjuVA07G37950	1	38.1286	9.36123	54.3266	53.067	52.0895
BjuVA10G01090	1	12.781	1.62873	15.2717	25.5846	24.0103
BjuVB02G62780	1	22.573	5.24843	35.8976	41.0753	41.7411
BjuVA07G21570	1	58.2514	17.4226	72.5274	72.388	70.4573
BjuVA08G26440	1	18.8496	6.72094	34.535	28.4705	32.3551
BjuVB02G03510	1	12.1247	3.69067	18.8448	15.2705	18.9335
BjuVA03G34620	1	74.8559	25.4849	180.427	172.908	164.028
BjuVB06G44170	1	39.6838	12.7161	106.62	146.199	100.943
BjuVB06G09260	1	3.92582	0.313039	3.93137	6.23149	6.76977
BjuVA01G03310	1	67.8094	27.1529	100.582	126.66	106.542
BjuVB06G20440	1	18.1669	6.17206	23.6209	29.1041	24.149
BjuVB05G15950	1	56.4745	22.5595	88.9871	82.4753	78.7206
BjuVB04G05810	1	33.8157	13.7274	51.937	45.8521	51.7905
BjuVB03G37520	1	12.8964	4.0428	23.3441	22.7774	23.5177
BjuVA02G21350	1	12.5736	3.45528	21.0757	24.6504	17.5007
BjuVB03G18050	1	29.0131	8.70899	52.1041	71.8894	47.9505
BjuVA01G04350	1	63.7713	26.6147	106.524	108.804	88.0501
BjuVA02G25480	1	26.6598	9.65507	49.223	69.2883	54.2065
BjuVA07G26530	1	122.24	39.9406	265.809	347.926	213.957
BjuVA03G12810	1	17.9984	6.80177	21.5463	24.0258	21.3593
BjuVB06G57920	1	65.2334	17.8499	92.1499	119.367	81.3506
BjuVA05G17020	1	25.4383	9.94697	65.3424	75.0472	54.7528
BjuVB02G43680	1	14.6663	5.31029	22.2526	21.6917	25.1234
BjuVA03G47750	1	10.8169	3.38182	14.8819	23.3206	18.6607
BjuVA10G05440	1	15.8317	6.40754	25.8489	23.509	22.5321
BjuVA09G42880	1	14.8307	5.07204	19.6548	19.8458	20.4574
BjuVA03G22840	1	90.7837	37.5693	157.848	134.435	151.004
BjuVA06G17810	1	14.0287	5.71846	19.5272	18.8694	20.8935
BjuVA02G11650	1	3.50189	0.994697	5.46129	5.31013	6.08243
BjuVA09G06670	1	4.17238	1.02377	8.34799	12.7373	10.689
BjuVB08G49100	1	12.3173	4.9854	15.2315	15.7451	16.1163
BjuVA09G08930	1	14.6516	4.19021	12.6028	14.8836	17.4587
BjuVA05G01200	1	16.227	5.68476	26.5025	48.4862	41.0865
BjuVB03G30970	1	16.5639	7.82152	19.7753	25.5086	20.6512
BjuVB03G55550	1	8.65047	2.26335	10.4401	13.3373	12.1312
BjuVB06G26380	1	20.0882	7.20168	33.6628	30.2798	27.6502
BjuVA07G40990	1	8.78804	3.01078	17.8935	22.67	20.9629
BjuVA08G06800	1	20.1291	5.42119	46.5146	44.579	42.8594
BjuVB02G51070	1	45.0295	21.6786	64.0051	88.5883	64.7983
BjuVB04G15980	1	7.0441	2.75993	11.8414	22.8551	17.0533
BjuVB04G16300	1	12.4146	5.98862	13.3934	13.7288	14.3972
BjuVB05G22850	1	8.07603	1.62187	8.96296	14.7438	10.2762
BjuVB06G21900	1	9.98457	3.75003	12.2341	14.4772	15.001
BjuVB05G08980	1	19.0631	7.74065	22.8089	27.6174	31.6395
BjuVA07G32150	1	7.25044	3.19262	17.7651	15.5873	13.1066
BjuVA06G37920	1	7.85686	2.18034	11.8044	19.7097	15.2799
BjuVB05G48830	1	5.94747	2.12825	7.23722	11.3822	8.31104
BjuVB04G10730	1	4.41363	1.8247	5.64216	6.40689	6.25672
BjuVB05G37120	1	20.9352	8.88118	32.1891	32.3495	36.7585
BjuVA10G25460	1	24.1632	10.4598	36.2892	42.7454	44.7274
BjuVB06G41860	1	2.82891	0.551414	6.14137	10.3778	8.59882
BjuVA07G37400	1	53.2371	25.9896	69.9849	72.5441	65.5123
BjuVA09G42690	1	19.4481	8.64251	22.3632	23.8864	26.7942
BjuVB07G29730	1	6.21395	1.63227	7.87739	6.81757	7.40042
BjuVB02G40710	1	7.03477	2.18141	12.2835	20.7078	16.4302
BjuVA04G16070	1	10.0176	3.68012	15.764	30.4155	23.2784
BjuVA09G62980	1	5.08154	2.21723	9.79859	18.8056	13.4135
BjuVB06G51310	1	25.0118	10.8457	30.3562	30.4296	34.459
BjuVA03G49870	1	4.04309	1.10948	6.46579	6.87059	7.30162
BjuVB03G48440	1	446.664	212.373	465.326	623.432	592.023
BjuVB06G25010	1	17.7348	8.59767	39.6461	51.9609	48.3987
BjuVA09G50350	1	9.47045	4.2404	11.7546	11.7803	13.1967
BjuVA04G02380	1	12.1147	4.65037	16.9346	25.2174	26.159
BjuVB03G19080	1	6.34812	2.02891	12.4194	11.6866	11.4984
BjuVA09G62440	1	3.31056	1.02665	2.23326	5.07202	4.96503
BjuVB02G37960	1	53.6348	24.8491	75.1027	57.6002	68.7065
BjuVB01G42450	1	7.45211	2.90231	12.2742	11.0299	10.9004
BjuVB03G35310	1	4.04945	1.68105	11.3761	7.79804	8.14093
BjuVB02G66510	1	10.1066	4.53456	12.0182	17.997	13.5498
BjuVB06G44700	1	7.18842	3.36792	14.2774	18.2456	12.5424
BjuVB08G18470	1	4.70264	1.38573	22.6042	36.301	23.7246
BjuVB04G53070	1	4.30838	1.38567	6.75534	8.28493	7.12731
BjuVB02G61530	1	9.94841	3.9803	14.7486	23.8065	17.6793
BjuVB02G71330	1	4.31691	1.18206	4.69465	6.53596	5.44383
BjuVB04G11050	1	3.9546	1.14394	8.11759	9.5225	5.77874
BjuVB08G33980	1	4.55592	1.98912	6.76108	12.9036	10.0805
BjuVA04G10780	1	11.2453	4.9131	10.1479	15.5307	12.3291
BjuVB08G32090	1	10.5559	3.80833	19.1439	29.657	26.8389
BjuVB07G08180	1	3.1604	0.996549	3.69467	4.65792	3.82002
BjuVA03G63090	1	14.0443	6.52968	28.8167	44.8427	28.902
BjuVB02G00180	1	61.2827	29.951	83.0729	103.39	78.5411
BjuVA03G02690	1	9.74059	2.86472	28.0553	23.6481	22.392
BjuVA05G21720	1	7.93253	3.50476	8.19075	9.3756	9.13152
BjuVA06G02370	1	13.189	5.34568	29.7591	26.085	22.1804
BjuVB02G70800	1	1.72997	0.478212	1.01683	2.78957	2.25614
BjuVB07G00680	1	9.61238	4.01321	16.1981	16.8255	12.3568
BjuVB03G23840	1	2.73523	1.02095	2.19703	3.32994	4.13298
BjuVA03G25160	1	15.0822	5.18183	25.7872	35.3235	27.4837
BjuVA07G38420	1	2.3001	0.656852	2.10089	2.79241	3.08748
BjuVA07G37330	1	3.98362	1.92152	4.49342	4.57271	5.07858
BjuVB06G33570	1	3.30784	1.15615	4.15068	5.83318	4.29823
BjuVA09G16990	1	5.53304	1.94644	6.32493	6.76199	6.94275
BjuVB05G39040	1	18.0296	7.75987	12.434	20.8265	18.1132
BjuVB02G41700	1	8.2571	3.82291	18.5101	20.623	14.867
BjuVA06G19640	1	5.14259	2.2447	8.40816	8.07338	7.04817
BjuVA05G06690	1	2.10119	0.60719	4.24039	6.27143	3.96424
BjuVA06G19790	1	16.7008	8.05172	22.3646	24.8676	22.9045
BjuVA01G14910	1	2.41975	0.721981	2.94423	2.77046	3.11804
BjuVB03G36260	1	3.41928	1.53373	4.215	3.39837	4.09135
BjuVB06G17190	1	13.0711	5.90381	16.5582	16.2754	16.0847
BjuVB06G01260	1	6.22449	2.61315	5.74858	10.0109	9.84005
BjuVA03G05830	1	1.19508	0.258609	2.09668	2.74685	2.66231
BjuVB03G19520	1	1.19825	0.204676	2.81565	2.93319	1.94384
BjuVB02G00440	1	0.609763	0.0608993	0.282818	1.10261	1.06467
BjuVB07G20330	1	7.77785	2.66547	6.88082	15.0094	16.2541
BjuVB02G31400	1	125.373	26.0575	251.964	284.592	295.855
BjuVA02G35620	1	3.79319	1.56158	25.6886	39.8301	29.0682
BjuVB05G37930	1	4.14047	1.70931	23.148	17.6344	15.5132
BjuVA08G33840	1	0.213346	0.0250561	3.40643	8.58966	5.71274
BjuV_Contig00272G00150	1	5.17795	3.94601	20.3105	33.5909	19.936
BjuVB08G58040	1	61.7353	12.7198	183.541	192.027	104.542
BjuVA01G40610	1	10.4684	3.67415	33.9841	51.2956	45.658
BjuVA09G55940	1	5.91912	2.20474	22.8238	57.07	47.4034
BjuVA07G41070	1	3.6794	3.26291	13.7843	28.5622	19.2484
BjuVA03G49380	1	6.89072	8.30511	31.7147	42.9672	26.1659
BjuVB07G18680	1	9.00816	5.88728	37.3904	90.1824	65.252
BjuVB02G29900	1	11.8144	10.5722	38.8942	47.6786	29.4345
BjuVA01G23790	1	3.32278	1.76137	11.4613	17.0155	10.0871
BjuVB08G17450	1	57.8997	46.485	189.549	565.014	396.975
BjuVA06G41130	1	2.44383	0.768153	8.88706	17.424	13.7216
BjuVA03G47820	1	1.28316	0.963063	7.64143	23.9017	18.5376
BjuVB06G32960	1	31.9156	38.7919	86.3238	114.328	91.4225
BjuVA08G33170	1	4.96582	2.34313	23.7324	49.7945	40.0821
BjuVB07G26970	1	4.80814	5.93375	12.4164	19.0832	15.3454
BjuVB03G43370	1	45.4498	21.0297	96.2863	122.505	91.1511
BjuVB08G11280	1	3.57385	1.66583	12.3701	16.7751	14.1842
BjuVB06G40830	1	1.49236	0.772153	6.29406	12.5497	7.99201
BjuVB01G02190	1	90.7819	92.9596	255.562	479.554	350.058
BjuVB01G15810	1	4.11316	4.35145	15.3508	14.1199	9.39226
BjuVA07G38520	1	0	0.712922	1.652	6.08032	5.14067
BjuVB07G13080	1	26.6653	25.5007	56.3065	61.7085	49.5158
BjuVB08G47350	1	24.3904	16.2418	50.9668	61.6074	54.1114
BjuVB08G08130	1	0.708707	1.13393	3.92342	4.55383	2.88572
BjuVA07G41630	1	5.76334	3.97415	14.2813	19.4559	12.6644
BjuVA09G58500	1	8.88567	7.18707	20.005	31.8089	26.938
BjuVA07G42440	1	1.86762	1.06375	9.54709	16.5113	12.4215
BjuVA10G23420	1	7.53349	4.62566	15.7135	14.2818	12.3622
BjuVB06G25530	1	1.96409	1.65667	8.46165	15.4576	11.4257
BjuVB02G73860	1	4.36604	2.4009	11.3921	11.9458	10.6122
BjuVA10G30950	1	18.3314	10.4511	36.888	52.1672	34.0871
BjuVB01G05030	1	8.89603	5.62817	18.1002	15.9926	13.0293
BjuVB02G05590	1	0.450432	0.207344	2.93475	9.83846	7.99371
BjuVA06G05850	1	5.04783	3.18324	12.3436	14.1888	11.9297
BjuVB07G24220	1	78.6472	46.7097	164.203	274.495	233.447
BjuVA08G00380	1	1.74169	1.17651	5.78657	9.42314	7.1851
BjuVB08G12890	1	1.6533	0.614753	4.51373	3.67395	2.66598
BjuVA10G29420	1	2.16752	1.79199	20.7252	16.8433	8.43802
BjuVB08G40490	1	0.971289	1.04661	3.6927	5.05304	3.19033
BjuVB05G21550	1	0.295166	0.402105	1.72652	1.81256	1.15214
BjuVB08G04390	1	6.6694	3.26546	10.2759	29.4765	20.5527
BjuVA09G39950	1	5.83779	4.16798	10.8262	26.3752	22.015
BjuVA03G45060	1	214.199	151.325	396.44	676.676	562.756
BjuVB03G08380	1	326.185	143.962	461.305	1014.31	699.933
BjuVB02G74810	1	8.59608	5.53739	14.9563	31.9414	27.8129
BjuVA03G18540	1	467.245	247.07	788.191	1415.05	1156.22
BjuVB02G23220	1	5.55147	5.81519	13.3262	24.9408	20.7071
BjuV_Contig00848G00200	1	5.4106	4.43438	9.39363	20.0424	15.4741
BjuVA03G64310	1	0.479901	0.255642	2.55944	5.8706	4.5765
BjuVA02G10510	1	5.7673	6.58063	11.0848	18.479	15.921
BjuVB02G34300	1	2.99912	2.15427	5.052	9.35434	8.47377
BjuVA04G22940	1	1.48297	1.29931	4.04928	7.93136	5.92529
BjuVA06G29970	1	11.4132	9.85104	20.293	28.8859	21.5903
BjuVB07G33030	1	0.689963	0.700763	3.17844	6.7623	5.71402
BjuVB03G46560	1	18.2305	12.3559	34.191	45.3946	44.3433
BjuVB08G39360	1	1.79915	1.345	3.55532	7.14414	6.53078
BjuVB06G32690	1	2.62513	1.74138	6.53815	13.1206	9.36687
BjuVA09G50250	1	5.07598	5.57715	8.15413	15.4197	14.5711
BjuVB02G24790	1	28.4216	19.3554	51.5103	98.0035	80.9546
BjuVA06G29940	1	13.0856	8.1972	19.651	39.1847	34.8106
BjuVA09G42210	1	3.23136	1.61347	7.14861	14.1893	13.3765
BjuVB06G11670	1	10.1987	9.32264	18.0942	29.4799	24.1353
BjuVB06G15790	1	14.4529	7.60291	24.9738	33.8253	28.3715
BjuVB04G23550	1	2.64032	1.44511	4.40163	10.3043	8.15704
BjuVA10G29640	1	8.70596	6.88129	11.3424	19.6479	18.0391
BjuVA10G15600	1	5.59192	2.12751	8.87021	26.7264	27.7564
BjuVA03G19660	1	1.41106	0.776909	2.76693	5.37151	4.23007
BjuVA10G23140	1	17.6347	12.9888	30.1477	39.4001	32.1722
BjuVA05G07620	1	22.0306	7.1055	42.3322	51.8538	44.9232
BjuVB05G18820	1	24.8088	14.0017	42.8719	55.4337	41.6043
BjuVB02G65900	1	9.0765	6.29542	15.0386	20.4162	14.3529
BjuVA08G18500	1	8.37797	6.97514	11.7224	24.5755	23.6245
BjuVB03G48380	1	3.64288	4.48804	8.58493	14.1096	11.0099
BjuVA07G38780	1	7.79831	6.38696	12.1498	22.8655	18.3974
BjuVB03G42720	1	0.155678	0.140459	1.12604	2.03976	1.42683
BjuVB08G52910	1	3.90351	3.48727	4.32371	11.3145	11.1588
BjuVB08G02090	1	8.99876	5.80404	18.488	23.3373	17.9476
BjuVB02G33790	1	24.8426	14.4339	43.2637	58.729	41.9999
BjuVB06G23880	1	0.540926	0.322114	0.70637	3.02966	2.7931
BjuVA07G39870	1	9.96829	7.06947	16.9256	24.1127	19.7362
BjuVB01G05940	1	3.72621	1.96894	6.86528	12.1232	9.69629
BjuVB02G43390	1	12.8596	11.2338	15.893	27.4555	22.8919
BjuVB04G38700	1	3.25007	1.25218	11.2456	16.5164	9.47945
BjuVB01G48860	1	12.7769	13.3478	18.7967	35.4153	33.0082
BjuVB01G32010	1	9.39981	5.67702	12.1898	21.5496	17.944
BjuVA03G12570	1	15.8421	8.04147	22.2267	36.713	32.0494
BjuVA06G35490	1	4.16185	2.96947	7.7901	12.6663	9.94683
BjuVB05G47290	1	0.133109	0.15269	0.67521	1.57935	1.51663
BjuVA06G20420	1	3.10271	1.84482	5.91032	10.2441	6.87134
BjuVA08G13620	1	8.64025	5.37266	15.6279	27.6489	24.6993
BjuVA04G20320	1	6.26946	4.61406	9.32592	15.1285	13.5499
BjuVA07G35320	1	0.560867	0.102064	1.6289	3.31489	2.03586
BjuVB06G37990	1	16.544	11.1003	20.6812	37.3641	30.5382
BjuVA02G09180	1	7.01234	3.83069	9.88636	16.843	17.8617
BjuVA03G63080	1	13.4147	6.8825	20.8309	30.5424	24.5875
BjuVB08G46760	1	9.53635	5.93911	13.8978	22.5485	15.8967
BjuVB08G38510	1	0.928076	1.38271	3.42861	5.72054	4.45043
BjuVA03G11670	1	1.3103	1.66198	3.42247	7.20553	6.90321
BjuVB02G10390	1	4.10221	2.01298	8.01795	11.6697	10.2765
BjuVB03G08880	1	11.7984	6.39733	17.8307	24.3787	23.1157
BjuVA08G29680	1	79.4921	47.8477	133.505	189.787	155.026
BjuVB06G33140	1	8.60072	5.72281	16.2663	21.3467	20.8228
BjuVA05G15260	1	3.74013	3.85566	5.47224	12.2019	11.7528
BjuVB01G39890	1	8.92452	7.23518	17.592	26.8322	24.8486
BjuVA06G48270	1	1.21587	0.729906	2.39554	5.97897	5.16586
BjuVB08G33570	1	5.76667	3.82445	9.48059	12.5347	12.0188
BjuVA05G16800	1	0.858336	0.616713	1.33872	3.34923	2.75925
BjuVB04G09440	1	33.5356	20.6259	34.3471	69.1586	73.7025
BjuVA02G34530	1	6.83837	9.00956	17.8827	18.9384	17.2275
BjuVB02G74830	1	32.8922	18.0932	61.8225	67.1331	44.1861
BjuVB04G12070	1	0.650017	0.281976	2.12975	6.54722	4.75428
BjuVB08G25800	1	15.8711	10.8287	21.8357	34.8244	33.3265
BjuVB08G25730	1	23.1781	23.1253	29.916	48.9257	44.5284
BjuVB04G02330	1	16.7985	13.3135	22.3841	34.5886	33.6811
BjuVB05G36960	1	3.60825	2.14268	7.17856	13.6875	11.0586
BjuVA03G56270	1	59.7656	27.9066	107.51	139.636	96.3223
BjuVB08G21120	1	14.4951	11.5831	19.597	30.0196	26.7602
BjuVB01G37140	1	7.61984	6.24831	13.9903	19.2632	15.4216
BjuVA01G27530	1	21.7536	17.0794	23.9594	46.8643	36.5185
BjuVA07G04250	1	15.1213	7.81817	24.5125	31.0466	29.2705
BjuVB02G32720	1	4.22121	3.79607	5.56185	11.0733	9.47584
BjuVB08G08610	1	5.34265	2.98666	11.8671	16.102	11.847
BjuVB06G45440	1	7.3756	3.58573	6.62517	17.8155	15.9271
BjuVA03G18730	1	5.12893	5.56697	8.27729	11.7327	9.33368
BjuVB05G28660	1	7.57807	4.07221	12.334	18.8365	12.7387
BjuVB03G08420	1	68.2624	42.5386	99.5792	146.829	108.306
BjuVA02G21990	1	0.111219	0.0632326	1.4773	3.03517	2.64672
BjuVA02G02210	1	4.51905	3.08088	9.70485	18.5627	18.2662
BjuVA07G39690	1	5.62202	3.46083	7.22206	12.8967	9.53753
BjuVB06G55990	1	2.90125	1.50462	4.91818	6.71985	6.95449
BjuVB02G11310	1	0.96324	0.350431	1.4475	4.59848	4.17866
BjuVA09G42300	1	10.1664	6.70959	20.4972	25.8303	26.2588
BjuVB06G17230	1	26.4159	21.4227	28.0787	53.8901	43.2913
BjuVB08G25720	1	1.17719	1.34854	2.74105	4.20597	3.70856
BjuVB04G37980	1	14.6379	7.21461	22.1107	32.6119	31.4788
BjuVB01G31630	1	6.81797	3.48377	9.54033	14.2361	11.3626
BjuVB06G07620	1	3.57287	2.66072	4.2178	9.56268	7.17645
BjuVA08G08420	1	6.38295	4.70146	8.15692	13.1933	11.6193
BjuVA09G38550	1	6.18289	3.24093	10.5122	16.9074	17.1855
BjuVB08G15410	1	3.72361	4.66002	5.26928	8.55102	8.00183
BjuVB04G29370	1	4.3421	2.67354	3.92695	9.13671	7.16474
BjuVB08G18690	1	1.72328	0.923219	3.04494	4.8381	3.90304
BjuVB04G34490	1	3.06859	1.25739	5.70098	10.5046	8.96986
BjuVA08G30330	1	1.56973	0.847378	2.92919	4.96368	5.11663
BjuVA02G06770	1	3.20366	3.92698	8.91114	18.8962	18.8899
BjuVA03G21260	1	1.42174	1.87822	2.16477	4.57479	4.28128
BjuVA08G18640	1	1.24855	0.211933	3.09115	4.66101	4.55576
BjuVB04G38580	1	6.16534	3.7715	8.73901	13.341	11.6077
BjuVA06G36940	1	1.90868	1.60638	4.05013	5.28074	3.7033
BjuVA08G21760	1	2.7796	1.93734	2.88119	6.81756	5.94388
BjuVB08G05010	1	0.74612	0.395814	3.53134	3.72483	2.06272
BjuVA02G19300	1	2.97469	2.096	4.71403	7.17314	7.6039
BjuVA01G14110	1	3.03713	1.82416	3.44251	7.84191	6.07116
BjuVB05G17780	1	17.6985	6.66201	23.7761	57.7258	50.2597
BjuVA05G42750	1	27.4454	25.6602	43.5959	58.8345	57.5423
BjuVA06G20240	1	7.90766	3.67684	11.8042	17.56	16.4842
BjuVA03G54940	1	1.82077	0.981645	3.19824	4.84594	3.74563
BjuVB07G29170	1	6.49034	4.14747	11.9173	14.3293	11.8889
BjuVB08G43360	1	5.94441	3.38706	10.406	12.4354	8.90109
BjuVB07G16680	1	3.81327	4.57786	6.46752	9.83838	7.93391
BjuVA07G22090	1	3.41088	2.81413	5.77811	9.64866	9.07715
BjuVB05G10210	1	1.96133	1.92115	2.9444	5.76306	5.50324
BjuVB05G32950	1	5.95595	3.71841	7.75191	19.3447	18.7736
BjuVB03G40430	1	6.02433	2.43126	7.36199	14.296	13.132
BjuVB08G27860	1	8.05761	7.96382	13.2848	21.1578	17.3755
BjuVB02G75240	1	1.87806	1.16465	3.53281	6.88403	7.18661
BjuVA07G32390	1	6.17735	3.73236	9.71526	13.8547	12.1853
BjuVB01G29800	1	0.0174534	0.0148845	0.132567	1.32426	1.20199
BjuVB04G02540	1	0.644586	0.213551	1.02233	2.28812	1.70892
BjuVA06G40210	1	4.77227	5.28369	8.1327	11.2433	10.1856
BjuVB06G05430	1	78.5388	68.8328	69.4554	158.104	143.984
BjuVA03G40770	1	3.46472	4.05786	6.33796	8.23615	7.51273
BjuVB03G31320	1	9.47525	7.07118	19.0316	25.2099	19.3031
BjuVA03G30420	1	23.9577	16.3978	40.4672	50.8738	56.3665
BjuVB06G36490	1	5.03424	2.999	6.56965	10.5329	10.2982
BjuVA09G14170	1	17.7329	13.6211	29.1608	38.8977	29.3956
BjuVA07G20880	1	0.301098	0.341967	1.14089	2.07555	1.5936
BjuVA08G28150	1	1.34956	1.09478	2.51131	4.03847	2.86084
BjuVA02G28870	1	3.53182	1.57319	4.12762	7.96382	7.63317
BjuVB08G23510	1	7.72411	8.85688	18.1951	26.1309	22.7764
BjuVB05G18890	1	3.63236	3.32305	4.49341	7.93224	6.21554
BjuVA06G08100	1	6.35237	7.7215	10.0125	14.2043	13.0024
BjuVB08G01430	1	27.8352	22.0514	45.7647	62.8914	44.7893
BjuVB05G17950	1	3.84708	1.65277	7.02905	11.6224	10.5575
BjuVA01G25620	1	3.16732	3.02301	3.43019	7.25821	6.65612
BjuVB03G00420	1	1.61558	0.677925	2.31252	6.10832	5.69163
BjuVB02G58030	1	1.32729	0.888986	3.53732	4.06217	4.33087
BjuVA09G32870	1	1.02576	0.958351	1.20958	2.81562	2.94478
BjuVA02G02680	1	0.0643359	0.412046	0.975691	1.75117	1.1979
BjuVA03G52070	1	0.0252832	0.0541194	0.146125	0.771619	0.740177
BjuVB03G33510	1	2.42928	3.04558	3.2848	5.68324	5.67372
BjuVA04G02410	1	0.199038	0.386965	1.17129	1.70928	1.73363
BjuVB01G48140	1	1.13713	1.06146	2.45829	3.22261	3.12362
BjuVB02G04650	1	4.259	2.42494	3.87826	10.0572	8.14478
BjuVB04G23740	1	7.34509	4.54433	9.13755	17.4284	18.0389
BjuVB04G05970	1	5.6941	4.08843	8.32267	11.8258	9.84399
BjuVA09G12610	1	4.14791	3.147	7.48247	10.2727	9.37625
BjuVB01G43850	1	2.53228	3.10917	3.64595	6.62895	6.41194
BjuVA02G18620	1	0.649696	0.919292	2.02915	2.5413	2.26413
BjuVA02G22130	1	3.95908	2.71905	9.71124	10.0662	9.97171
BjuVA01G05200	1	4.10128	4.25126	7.04242	9.66132	8.83926
BjuVA09G47790	1	3.03828	2.31348	3.72137	6.92867	5.20791
BjuVA08G30680	1	9.22259	7.89668	16.285	19.3265	17.1058
BjuVA05G24230	1	2.18275	1.01283	3.04033	6.3797	5.04914
BjuVA09G23810	1	2.90349	1.99812	2.44649	7.3794	8.10402
BjuVB02G76050	1	3.31399	1.31071	6.38954	9.90909	10.1263
BjuVB04G39510	1	4.43928	4.67997	5.60346	10.1633	8.71952
BjuVA07G27750	1	1.97484	1.50082	3.71668	6.3478	4.61074
BjuVA07G28980	1	4.82954	3.01305	4.54243	11.5733	11.4363
BjuVB07G14560	1	6.91579	3.22782	8.88823	16.4634	15.2907
BjuVB07G09410	1	0	0.515378	0.443017	1.09535	1.03562
BjuVB08G49580	1	0.224215	0.0714694	0.35747	1.47674	1.41951
BjuVA03G30770	1	10.5745	7.85727	18.7516	23.7008	25.1101
BjuVB03G46390	1	8.22369	3.8109	14.8106	18.5339	12.2181
BjuVB08G02250	1	3.09284	2.46305	3.85372	7.11901	5.88366
BjuVB02G26690	1	0.224805	0.32511	0.674579	1.91916	1.52851
BjuVA04G05980	1	10.905	13.9985	20.9899	24.7668	20.6102
BjuVA08G06000	1	1.59195	3.04608	4.50673	5.78334	5.4789
BjuVB02G71090	1	16.04	15.4363	23.13	33.5188	32.552
BjuVA06G45790	1	2.37253	3.01408	3.58314	6.22828	5.94221
BjuVB06G42070	1	2.32427	2.81723	3.08778	5.7	5.83402
BjuVA10G21590	1	5.823	2.54795	8.41611	13.0005	9.47249
BjuVA09G05270	1	3.38066	3.55401	5.38685	7.55444	7.93732
BjuVB06G12680	1	4.48441	4.01964	6.74162	9.06366	7.64536
BjuVB08G07560	1	3.76474	2.54894	5.53584	7.70796	6.80474
BjuVB08G06690	1	1.47186	0.568484	1.24435	4.56862	3.90139
BjuVA07G39330	1	3.09963	3.89057	3.9827	101.38	87.1197
BjuVA07G39370	1	0	0.0343356	0.653732	2.5099	3.16381
BjuVB01G45650	1	4.06334	3.9217	6.91492	9.47985	7.78628
BjuVA03G05040	1	10.2909	5.774	12.9776	21.0535	16.3289
BjuVA04G00690	1	13.7761	13.1799	14.2624	37.9927	32.9575
BjuVA07G21930	1	0.421582	0.153147	0.601834	2.68059	2.50708
BjuVB03G28410	1	2.4952	1.4687	2.48354	5.46861	4.6466
BjuVA02G02510	1	0.0272255	0.0232182	0	1.22493	0
BjuVB03G40860	1	15.4832	12.5168	20.4872	31.8816	28.4173
BjuVA07G33170	1	0.753172	0.293341	1.20596	2.63318	2.41714
BjuVB03G39050	1	1.70986	1.9099	3.05752	6.35473	6.21916
BjuVB02G56900	1	2.82233	2.97045	3.44614	5.94754	5.3491
BjuVB02G32240	1	3.12971	3.06363	4.00543	6.29219	5.34871
BjuVA09G42390	1	5.55992	6.84147	8.36664	14.3862	12.9107
BjuVA07G09440	1	0.0776227	0.107987	0.262279	0.676398	0.487446
BjuVB03G07770	1	0.32276	0.128924	2.41146	2.44577	1.20558
BjuVB01G27830	1	1.46102	1.16952	2.50198	3.93792	3.14562
BjuVA08G21600	1	0.284268	0.0993404	1.09978	1.82516	1.79655
BjuVA03G64340	1	2.46246	2.46031	3.28709	5.95519	5.0923
BjuVB04G29420	1	0	0.17212	0.84871	5.54601	5.45974
BjuVA05G26580	1	2.74485	1.73318	4.33198	7.286	5.45991
BjuVB04G23600	1	0.241969	0.381136	0.651111	1.54861	1.33526
BjuVA09G52690	1	4.25274	3.80006	6.39978	8.94028	8.97108
BjuVA03G38400	1	0.605107	1.13629	1.46973	2.7749	2.46056
BjuVA05G25280	1	1.19279	0.840051	1.69826	3.52983	3.0639
BjuVB06G37710	1	1.84964	1.89111	2.72719	4.48132	3.57135
BjuVA09G65670	1	0.171134	0.0955625	0.331963	0.942484	0.752776
BjuVA02G46210	1	1.6559	1.33293	3.53417	7.38235	7.05984
BjuVB04G19330	1	2.01387	1.14319	3.09744	4.52707	4.23678
BjuVB08G50620	1	1.56912	1.27639	2.96992	4.24963	4.19678
BjuVA06G38840	1	4.46343	3.52852	6.99684	10.5068	8.81189
BjuVB06G41970	1	5.13798	3.35983	12.2376	12.1467	12.8515
BjuVB03G08090	1	6.91108	7.38883	9.24567	14.267	12.2074
BjuVB02G65980	1	1.19718	0.908175	1.51853	3.70076	2.77903
BjuVA05G29010	1	2.2348	1.33153	4.42226	5.39798	4.45271
BjuVB06G55900	1	0.566403	0.0486907	0.399186	2.61489	2.85567
BjuVA09G62330	1	4.01089	3.02494	5.46216	10.3313	9.85098
BjuV_Contig00855G00020	1	0	0.111628	0.266407	0.96531	1.18732
BjuVA03G33340	1	1.78258	1.60342	1.88278	4.43855	3.90152
BjuVB06G37760	1	0.94468	0.614483	1.46005	3.03504	2.32635
BjuVA04G01390	1	0.814605	0.441744	0.780717	3.20524	3.13996
BjuVA02G10270	1	1.63087	2.60538	3.36118	6.49781	5.50402
BjuVA04G12860	1	46.6991	46.5428	63.818	97.1978	103.327
BjuVA07G16230	1	2.87021	3.44668	4.70638	6.61265	5.97366
BjuVA01G08450	1	0.801025	2.50866	6.85956	17.6796	12.5339
BjuVA06G39580	1	0.480586	0.34727	1.2673	1.40769	1.56259
BjuVA01G33820	1	1.43811	0.577172	2.53728	3.80634	4.53981
BjuVB04G31630	1	0.964295	1.32276	1.8504	2.4287	2.10178
BjuVA05G22260	1	5.23698	3.25799	8.13486	10.7355	9.34167
BjuVA09G60240	1	0	0.0495322	0.658515	1.19229	0
BjuVB03G47460	1	3.23001	3.11221	4.74616	7.34175	7.27431
BjuVA01G01330	1	0.778605	0.704959	1.73582	2.47736	1.76614
BjuVB04G12220	1	4.4956	2.01253	9.35181	9.18998	10.2409
BjuVB01G41600	1	7.24888	3.33854	9.43617	16.8741	13.8324
BjuVA09G48290	1	4.28509	4.71481	6.36503	9.08437	8.5424
BjuVA04G11470	1	14.6627	9.68424	22.0368	32.4759	32.8399
BjuVB02G42870	1	3.79438	2.77854	4.26991	8.78666	8.67543
BjuVA06G03130	1	0.0187582	0.0319945	0.0568008	0.61679	0.492018
BjuVA01G31410	1	2.46546	2.4519	4.19365	5.24045	5.09464
BjuVB08G49570	1	6.8998	7.05039	12.2086	13.891	13.2085
BjuVB07G19380	1	0.839172	0.719762	2.35573	2.49349	1.56552
BjuVA01G43180	1	0.515019	0.270912	0.971098	1.77061	1.568
BjuVA01G44000	1	0.932894	0.548093	0.761599	2.05298	2.01425
BjuVA01G01390	1	0.315221	0.66877	1.3861	1.41028	1.32854
BjuVA04G27730	1	1.38758	0.228034	1.30206	4.13056	2.8355
BjuVA07G13950	1	0	0.114259	0.323987	2.26374	2.1293
BjuVA09G05560	1	1.65895	0.69885	3.70486	5.15348	5.66186
BjuVA02G00990	1	0	0.262665	0.784172	0.971324	1.19882
BjuVB06G32670	1	0.344201	0.220046	0.516222	1.52925	1.08263
BjuVB04G30550	1	0.0783115	0.133903	0.364359	1.27564	0.8723
BjuVA08G33320	1	0.614038	0.621935	1.53197	1.59313	1.11701
BjuVB02G69960	1	0.717354	0.557855	2.52565	4.493	3.57986
BjuVA06G36740	1	0.0120862	0.0724592	0.231506	0.360816	0.35383
BjuVB02G28900	1	1.06312	0.651527	1.66848	2.40578	2.24901
BjuVB05G60000	1	0.268385	0.216712	0.679512	1.7581	1.24944
BjuVB04G07990	1	3.30056	1.57711	10.0596	10.4057	8.54973
BjuVA07G32430	1	0.110914	0.160224	0.227092	6.49097	6.8068
BjuVB05G12710	1	3.64631	3.8873	8.73969	29.5557	25.9699
BjuVB08G15640	1	0	0.13096	0.0716583	1.89222	1.66661
BjuVB04G17500	1	7.28662	7.62584	15.134	34.2936	23.8663
BjuVB03G04950	1	5.73084	2.46759	23.3807	51.0789	35.2922
BjuVB06G11660	1	2.20902	0.55982	5.7898	16.3171	11.82
BjuVA09G65070	1	13.8671	7.12841	24.9861	27.5089	29.9419
BjuVB08G58340	1	11.1738	6.90385	14.5208	22.1153	24.3084
BjuVB08G56340	1	22.9745	6.72888	29.8433	77.8781	65.5078
BjuVB04G19870	1	41.436	3.90026	76.1051	89.5693	58.285
BjuVA06G10890	1	30.4431	6.82413	45.0683	60.0297	43.5706
BjuVA08G21410	1	28.0191	5.40591	47.4417	67.4732	80.8368
BjuVA02G04510	1	94.9199	11.002	190.966	201.863	151.644
BjuVA07G36590	1	133.764	36.6599	218.22	206.931	202.957
BjuVB01G06180	1	121.41	33.9318	259.715	282.038	303.987
BjuVA01G15450	1	3.73933	23.7495	25.9163	100.489	102.627
BjuVB06G13270	1	38.3339	10.5258	51.4982	110.395	93.7178
BjuVB01G26270	1	20.0285	5.31655	63.0604	56.3746	48.1387
BjuVB03G34110	1	7.86029	0.980923	10.6656	21.7648	21.2699
BjuVB01G05350	1	21.8812	4.57549	45.9697	63.6752	61.6962
BjuVB07G20340	1	26.5352	8.62754	46.5281	36.3701	45.8168
BjuVA02G48290	1	15.4947	3.41031	36.5077	82.7804	52.4443
BjuVA07G39550	1	0.131726	4.11707	5.129	7.8626	7.229
BjuVA09G59610	1	12.205	2.09658	44.1325	41.0783	51.8093
BjuVA06G17900	1	0.870905	6.48026	14.8938	33.5757	29.1595
BjuVB08G52010	1	66.943	25.3793	75.7347	87.7374	104.479
BjuVA09G65480	1	25.3976	6.6093	62.2171	76.4833	77.2451
BjuVA06G01650	1	44.2811	110.737	237.467	358.505	388.092
BjuVA08G17010	1	9.16476	2.89307	13.4319	13.8837	11.1742
BjuVB02G56330	1	11.5367	3.06649	31.794	33.4508	20.7576
BjuVA04G29830	1	12.1713	2.57807	16.7053	41.8397	37.5279
BjuVB08G53060	1	30.9385	11.4211	51.0543	57.0393	39.3157
BjuVA09G48310	1	14.9859	4.76859	19.2337	27.0478	28.8614
BjuVB01G33500	1	5.2795	1.29957	15.8468	16.9359	18.0804
BjuVB03G03130	1	26.1904	10.2428	32.3125	58.3627	61.0632
BjuVB05G11200	1	22.1431	7.8529	49.6204	51.6749	59.1727
BjuVA03G02710	1	5.05363	16.7983	32.5279	52.3312	35.1363
BjuVB05G17270	1	13.9073	4.73394	29.1624	65.9692	49.1501
BjuVA03G21200	1	1.53359	6.88493	12.1421	16.4462	15.058
BjuVA07G42350	1	3.16077	13.3121	17.5354	30.1889	30.2308
BjuVB06G04200	1	29.1128	11.7066	46.655	58.0817	63.1925
BjuVA09G19050	1	15.6181	4.53406	41.7976	57.3457	54.95
BjuVB02G39430	1	27.3639	8.25119	44.9764	37.2434	47.8368
BjuVA09G48330	1	4.08082	1.03848	6.89112	5.20288	5.52642
BjuVB04G01290	1	23.3544	9.43282	51.4824	91.4187	92.6621
BjuVA06G35740	1	20.1258	6.55629	35.9216	59.5978	69.2367
BjuVA08G20030	1	2.03553	9.0328	53.6614	160.458	165.473
BjuVB04G25630	1	16.4682	5.80323	24.4865	42.1592	45.8625
BjuVB03G22750	1	72.6266	34.2214	162.033	152.329	164.627
BjuVB03G08740	1	3.34385	0.804294	3.64346	7.29343	8.42186
BjuVB04G49050	1	4.30648	0.851321	9.02334	9.16109	6.45669
BjuVB03G08730	1	28.664	13.5099	44.7481	61.5447	67.5607
BjuVA08G28720	1	10.9476	3.43422	41.2031	62.0582	64.4547
BjuVB03G42510	1	9.81483	3.47772	15.2266	13.4042	12.3351
BjuVB03G44980	1	4.18515	41.7364	269.021	702.906	700.532
BjuVB05G19640	1	3.82876	10.1542	13.2062	21.5881	21.4892
BjuVA02G17410	1	0.251121	1.8537	77.8214	167.389	149.488
BjuVA03G15940	1	0.284122	4.00367	15.1689	11.7716	8.64964
BjuVA09G20920	1	3.42838	0.927791	6.81971	17.4306	12.9181
BjuVA08G34100	1	1.9718	0.362995	1.33529	2.76716	3.49487
BjuVA03G10580	1	5.49594	1.25235	17.4637	9.48004	13.5376
BjuVA10G27520	1	0.190568	1.26423	3.98409	7.32497	6.44747
BjuVB05G51840	1	3.52587	0.894149	12.6592	13.4375	15.411
BjuVB07G21010	1	8.61661	3.87197	17.1956	24.2991	24.0665
BjuVA07G03690	1	6.06934	2.37676	9.44594	7.43123	9.56834
BjuVA08G12820	1	18.3793	6.52733	97.6349	134.944	160.37
BjuVB07G19500	1	6.3907	1.99994	15.2512	17.1929	21.2645
BjuVA07G35100	1	3.20852	0.508249	6.81947	5.63385	7.67686
BjuVB03G33080	1	6.53167	2.9848	8.00186	7.97047	9.98477
BjuVB03G26490	1	0.287558	1.77594	2.93347	24.975	22.5296
BjuVB04G36720	1	21.2237	9.14085	38.8393	56.1715	60.8864
BjuVA07G16610	1	4.56939	1.64116	6.40008	7.01807	8.42041
BjuVA02G45630	1	0.412338	2.64055	27.384	143.304	105.53
BjuVA02G06730	1	2.62338	0.861725	4.96061	4.78027	5.90073
BjuVA07G01040	1	9.79415	4.48892	13.5277	17.4431	19.18
BjuVA02G13550	1	7.44923	2.82069	10.7176	11.9294	14.3484
BjuVB02G61030	1	6.24576	2.87302	9.21852	11.7306	14.631
BjuVB05G13680	1	1.54483	0.483112	3.08899	5.39705	5.83576
BjuVA07G34700	1	4.74789	1.98458	5.20548	7.08834	8.55454
BjuVA10G32440	1	9.36821	3.62058	9.72791	17.8841	20.5294
BjuVA09G40900	1	28.3067	12.2203	90.1231	126.276	159.052
BjuVA02G42140	1	9.82448	4.54557	20.7599	22.1727	23.4104
BjuVB02G52820	1	0.131707	1.17418	1.49483	3.27655	2.83281
BjuVB03G04730	1	4.08327	1.6763	5.82689	6.02953	7.7461
BjuVA10G20800	1	7.60113	3.39044	12.7579	13.9333	16.1061
BjuVB04G14710	1	2.94285	6.26122	26.1122	185.357	155.144
BjuVB06G14380	1	2.12372	5.08934	15.6993	25.1999	28.4175
BjuVB03G36530	1	38.715	17.7012	41.767	40.3301	51.1736
BjuVB07G06930	1	7.50699	3.23613	24.9502	24.8287	24.5207
BjuVB04G11200	1	9.40642	3.41355	23.0701	16.7142	21.3363
BjuVA03G48460	1	24.4677	31.5125	190.942	198.075	226.679
BjuVA06G01640	1	0.601892	4.00677	23.4796	120.774	130.806
BjuVA07G38730	1	5.37805	11.5979	43.4428	74.6025	60.9819
BjuVA02G44590	1	5.28871	8.42451	39.4631	65.9742	78.6395
BjuVB05G56430	1	17.3006	23.5461	92.4036	86.8092	101.881
BjuVB06G11080	1	21.2064	19.7242	107.42	105.397	99.7188
BjuVA02G18570	1	1.1613	2.47	14.0851	30.6474	34.6998
BjuVB05G34010	1	21.3793	18.1995	121.708	118.208	145.122
BjuVA03G66950	1	7.27574	5.46944	33.9489	55.4799	57.503
BjuVA04G13420	1	3.39463	4.03765	21.8401	19.34	21.3745
BjuVB05G28920	1	7.81147	8.09913	39.0442	43.8899	46.5842
BjuVB05G48800	1	11.6889	13.336	97.6878	97.0091	79.029
BjuVA04G32840	1	54.526	48.2208	237.303	266.685	332.915
BjuVB03G42540	1	7.17377	3.02544	40.1196	39.2637	44.6577
BjuVA06G44290	1	8.93797	5.24401	51.1438	95.8101	113.425
BjuVA04G18480	1	23.5955	45.4543	133.146	156.534	127.447
BjuVA04G12650	1	0.901223	1.10425	12.6579	8.32918	7.18774
BjuVA07G39360	1	14.0407	22.0217	63.8612	119.307	116.483
BjuVA06G00050	1	0.945995	2.01794	9.20178	17.8039	20.265
BjuVB03G06770	1	14.2966	14.5939	55.5275	77.7269	94.5356
BjuVA02G00380	1	1.54927	1.65534	8.39297	20.5001	17.072
BjuVA06G36550	1	6.43412	4.48315	24.9915	63.3265	68.0572
BjuVA10G10000	1	1.36986	1.07902	12.1825	19.73	21.45
BjuVA03G40780	1	0.877746	0.210954	5.65281	6.38501	8.2649
BjuVA08G32540	1	4.31185	6.15915	18.1115	59.5089	54.3995
BjuVA07G04170	1	1.24691	1.55502	7.2874	18.247	15.513
BjuVB01G03480	1	1.06976	0.952298	6.4231	3.31869	3.71245
BjuVB03G04470	1	111.272	158.775	337.794	427.182	426.65
BjuVA01G28360	1	4.06541	2.77124	17.674	17.4628	21.1975
BjuVB02G73210	1	0.397219	0.0468431	5.07351	8.1557	6.84455
BjuVA08G30380	1	1.56399	3.36931	8.88151	25.0341	24.0175
BjuVB02G16350	1	3.32907	2.38892	12.3127	15.0017	17.8557
BjuVB08G18830	1	0	0.0728812	4.21013	9.608	11.8351
BjuVB01G34230	1	21.5083	27.479	63.5636	66.0493	71.7639
BjuVB08G04370	1	2.14841	1.59394	8.99571	21.308	25.4764
BjuVA06G00040	1	0.080053	0.836319	3.63753	29.8824	31.1756
BjuVA08G33690	1	44.9183	68.9584	140.423	189.265	180.491
BjuVB05G14740	1	7.32647	4.87541	22.5021	16.2856	17.0454
BjuVB01G18990	1	309.942	165.276	859.952	721.578	839.437
BjuVB05G21040	1	23.4539	42.2231	78.6747	62.0376	47.902
BjuVA04G18840	1	26.416	16.8898	151.254	198.173	236.153
BjuVB06G22700	1	141.436	84.7194	493.828	806.994	750.229
BjuVA05G28770	1	1.6519	2.95578	8.91036	12.5438	12.9428
BjuVB04G26290	1	10.9148	4.49289	46.5693	68.5658	80.3214
BjuVA03G14750	1	4.38426	1.77762	19.6614	13.7314	16.6502
BjuVA03G21900	1	33.1963	39.567	87.0443	77.2048	86.2792
BjuVB02G20780	1	0.737805	0.477497	4.36322	9.6638	8.22921
BjuVA04G16680	1	276.33	126.994	745.126	551.551	690.816
BjuVB06G42330	1	7.16829	8.85181	23.5316	53.3156	57.4574
BjuVA06G20280	1	7.94999	6.81454	21.1844	18.539	20.3361
BjuVA04G29850	1	0.75064	0.0934407	5.35424	6.0028	6.15954
BjuVB03G43260	1	3.21155	4.61263	16.6257	52.2611	57.9814
BjuVA06G01330	1	0.012833	1.20483	2.08666	15.7421	16.1643
BjuVB05G13420	1	7.54488	13.0372	20.2938	50.2457	56.3373
BjuVA06G14780	1	0.432651	0.847556	4.0112	14.6606	12.2596
BjuVB03G44600	1	0.18782	1.65303	38.5561	106.967	91.2536
BjuVB03G37970	1	0.0147942	0.189628	2.15226	1.95743	1.54025
BjuVA01G40600	1	18.6362	14.3714	51.9392	81.7297	97.5702
BjuVB02G55430	1	21.6433	14.1185	50.0919	43.0807	43.8552
BjuVB02G26480	1	1.90683	2.81334	8.89983	18.0701	21.5678
BjuVB08G12880	1	9.87808	5.74377	30.6623	31.3449	37.6872
BjuVB04G40840	1	0.11862	0.590941	1.82583	3.81557	4.11141
BjuVB03G47470	1	10.7966	15.0011	31.9975	66.7107	77.538
BjuVB03G29820	1	5.77104	5.73897	19.7641	35.1608	40.2621
BjuVA02G05990	1	0.0599939	0.373503	1.98428	4.00524	3.18557
BjuV_Contig00450G00210	1	9.31331	5.11735	22.4198	19.6598	24.9534
BjuVB05G29480	1	0.0548264	0.217591	2.39853	2.96005	2.54263
BjuVA03G07630	1	2.408	2.21061	8.55043	11.8127	12.1718
BjuVA06G40710	1	4.99396	3.92227	14.6508	11.0638	13.9485
BjuVB04G46960	1	2.77364	2.65098	9.46223	7.57108	8.46651
BjuVA07G13970	1	4.64676	5.49716	16.8501	10.1084	11.438
BjuVB07G20700	1	0	0.128207	1.27638	3.03749	3.2589
BjuVA03G09430	1	8.60785	7.42095	19.3506	18.7108	18.7609
BjuVB08G40000	1	1.51347	3.26729	5.528	5.22881	4.15302
BjuVA10G22570	1	3.23758	2.36683	7.87493	15.6727	15.6921
BjuVA03G31860	1	51.7751	33.9428	132.217	159.661	167.55
BjuVA07G26100	1	1.70383	1.12305	5.71471	8.20358	7.83216
BjuVB07G17320	1	7.95948	4.79747	18.6436	13.2313	14.3974
BjuVB01G38220	1	0.596485	1.08856	2.54892	4.56174	5.10051
BjuVB05G26310	1	31.6789	41.4014	75.3975	88.8142	79.3773
BjuVB02G27620	1	3.66631	3.43823	9.93559	15.0003	13.1973
BjuVA01G35690	1	2.47125	0.400301	9.24113	4.40572	6.00981
BjuVA05G24810	1	30.775	35.8404	66.9556	75.2615	69.1354
BjuVB01G42090	1	0.0387207	0.397245	2.96279	10.3751	9.02596
BjuVA10G03480	1	31.0039	19.5928	65.2344	72.3445	70.9057
BjuVA02G37550	1	14.6398	10.0842	32.023	45.6559	52.8034
BjuVB02G64250	1	10.4515	9.07325	23.8877	28.486	32.8306
BjuVA04G04460	1	2.1767	3.91048	7.83696	10.7113	9.88407
BjuVA01G00370	1	131.033	87.286	293.566	244.411	288.211
BjuVB05G12030	1	2.77872	2.63538	8.21441	14.8383	16.3149
BjuVA09G37770	1	10.6224	13.9711	30.9859	51.5996	48.1947
BjuVA08G21990	1	15.4827	9.13337	33.8822	41.7189	49.7723
BjuVA03G47210	1	11.6842	9.21092	25.3391	22.1202	27.6625
BjuVA02G03140	1	14.6654	17.7536	32.6633	45.2353	37.9318
BjuVB03G47860	1	4.75168	3.13215	9.78354	7.99507	9.26406
BjuVA05G27870	1	1.90477	0.780244	5.52045	4.49352	5.09716
BjuV_Contig00867G00130	1	0.109199	0.082776	1.08466	1.90216	1.70257
BjuVA08G29360	1	16.7298	9.07949	41.5299	32.5009	36.4805
BjuVB01G01270	1	12.2584	13.9999	28.78	40.0726	46.1
BjuVA03G68550	1	1.12488	0.24494	7.85347	6.67505	8.94011
BjuVB02G09480	1	148.78	103.178	327.446	397.828	416.651
BjuVA09G12570	1	0.872614	2.4041	3.49453	2.83774	2.17123
BjuVB07G17270	1	5.69174	3.74436	13.1049	18.4889	19.8217
BjuVA08G26040	1	6.93207	4.42815	14.6923	14.1642	13.2495
BjuVB02G74000	1	6.34983	4.11965	12.9621	16.128	17.1189
BjuVA09G63480	1	0.52762	0.159898	3.62486	7.04621	6.53721
BjuVA01G37800	1	2.0521	3.50791	6.08286	13.4817	15.0841
BjuVA07G18800	1	0.712122	0.142931	5.79204	3.46685	3.47967
BjuVA01G00280	1	21.1038	11.72	42.5305	51.4264	61.9189
BjuVB06G48260	1	6.9783	5.32217	14.5409	20.453	23.552
BjuVA01G05500	1	1.23342	0.912898	5.17582	5.88638	6.8781
BjuVA09G58130	1	2.74624	3.30493	6.04466	10.1369	11.0129
BjuVA06G31100	1	0.715485	1.56457	3.45305	13.3294	8.6893
BjuVA02G22900	1	0.039903	0.272577	1.95054	21.2485	17.2015
BjuVA06G44860	1	10.2554	8.568	21.5917	33.3948	36.2709
BjuVA06G39380	1	0.121715	0.394962	1.18552	2.10811	2.32779
BjuVA08G23630	1	1.14536	2.05158	4.42796	9.55552	7.97865
BjuVA07G27820	1	5.11956	6.49055	13.0353	7.57091	8.19296
BjuVA03G34750	1	0.128621	0.262248	2.06869	2.01576	2.22853
BjuVA09G37720	1	0.0757341	0.112548	1.22136	1.02046	1.32418
BjuVB02G44580	1	1.50696	0.782811	4.73583	3.25068	4.66336
BjuVB01G33800	1	7.37445	5.05215	15.888	13.3603	16.1973
BjuVA06G40510	1	2.8503	5.29637	7.9778	5.5339	4.46562
BjuVA03G45080	1	29.554	29.6393	53.798	182.646	135.555
BjuVA02G02620	1	1.60974	1.53917	2.97847	11.2029	8.5349
BjuVB06G17130	1	2.68589	5.02004	7.27084	28.7856	31.1244
BjuVA03G34140	1	0.470223	0.269257	1.7294	6.18936	6.00496
BjuVB06G48190	1	22.1091	10.9262	54.4885	88.5573	93.3597
BjuVB04G17690	1	10.7215	7.99675	18.2836	37.8258	37.9187
BjuVA07G21840	1	0.585696	1.08931	2.02077	4.8817	4.58914
BjuVB08G10080	1	5.64514	6.26515	11.8955	22.6954	23.6013
BjuVB07G13120	1	8.6332	15.9801	19.0954	31.1305	31.9961
BjuVB01G40530	1	10.7998	5.1859	17.65	51.6425	34.6443
BjuVB02G09500	1	27.405	31.79	37.1307	98.9609	84.7531
BjuVB05G19570	1	3.39847	1.47153	4.58622	13.8139	9.52874
BjuVA04G18540	1	4.71241	4.69067	5.42316	22.7628	20.733
BjuVB01G15680	1	5.03177	3.84888	8.59553	18.4009	20.6088
BjuVB03G11750	1	10.2978	11.7259	19.1554	32.2399	38.0126
BjuVA05G23460	1	2.89239	3.75288	5.43714	12.8428	12.5599
BjuVA09G36550	1	0.145727	0.173854	2.11653	10.4304	7.92544
BjuVB05G00080	1	24.6678	15.6717	28.6229	83.9459	71.1511
BjuVB05G12860	1	4.74011	4.82617	7.2869	16.9667	16.5975
BjuVA06G08230	1	10.757	7.52117	13.0828	38.9848	29.7828
BjuVB08G13590	1	6.69858	6.93527	12.2433	21.5796	21.4019
BjuVA05G34530	1	40.2805	21.2972	73.5002	140.529	159.542
BjuVA03G15570	1	2.08715	3.3821	6.33505	10.5808	12.6502
BjuV_Contig00934G00130	1	7.2997	3.00636	14.6876	25.3213	32.8393
BjuVA04G02600	1	96.1001	74.6161	163.219	225.789	235.986
BjuVB03G05360	1	5.2931	5.02655	10.0072	20.2078	14.4263
BjuVA06G07320	1	6.44565	5.97303	10.767	20.8163	23.9421
BjuVA09G02880	1	5.35274	4.20366	6.97986	17.1668	12.616
BjuVB03G11280	1	0.907503	1.22841	1.63818	5.17713	5.19184
BjuVB02G25830	1	8.27315	7.47869	9.58745	23.6099	22.5129
BjuVA03G05630	1	0.0978992	0.341863	0.647111	4.95168	4.46994
BjuVA10G26190	1	1.13406	1.58741	2.23635	7.35877	7.41244
BjuVA06G12890	1	2.41101	2.04196	3.338	8.35752	6.3539
BjuVB02G64170	1	1.41597	2.9772	4.81306	9.3249	10.2528
BjuVA07G14710	1	0.254435	0.682695	1.17242	3.38235	3.67767
BjuVA03G26510	1	0	0.125501	0.466941	3.30771	2.54391
BjuVA10G32890	1	4.17841	3.88655	5.1323	11.8648	11.2923
BjuVA10G15220	1	0.412008	0.313771	0.773483	3.80174	3.81171
BjuVA08G24300	1	33.1827	24.9837	40.5842	75.1035	82.5058
BjuVB08G36230	1	2.92995	2.15587	5.27708	11.3254	11.9785
BjuVA10G19380	1	37.007	42.7133	61.9036	98.6523	108.796
BjuVA03G57760	1	1.57452	0.660098	1.55005	7.27089	5.07027
BjuVB03G48390	1	0.441299	0.500071	1.26887	6.26087	5.22896
BjuVA01G19270	1	1.47902	3.42517	4.77818	8.8508	7.84822
BjuVB02G33160	1	5.76888	6.19409	9.46715	18.9192	14.1991
BjuVA02G14700	1	0.338075	0.511506	1.57633	3.45141	4.34979
BjuVB01G39430	1	20.0866	14.5638	32.7239	55.5977	65.5064
BjuVB05G58090	1	13.5485	9.9881	15.4262	30.9276	23.8345
BjuVA09G42540	1	3.3862	3.95723	4.97751	9.40928	10.2244
BjuVB03G20520	1	4.81105	7.14589	8.44254	15.107	16.1467
BjuVA10G32600	1	4.72081	5.0198	5.43257	11.4862	10.6684
BjuVB05G11000	1	4.10424	4.65173	7.22975	15.5682	12.1212
BjuVA03G32110	1	9.84569	10.8998	12.0817	23.5487	24.1764
BjuVB05G02620	1	14.6499	12.5131	26.2778	33.019	37.2135
BjuVB05G41640	1	2.65708	2.55298	3.78953	7.67102	8.21765
BjuVA09G05210	1	1.81133	1.19272	4.01733	6.65809	7.29979
BjuVA05G44110	1	10.3043	10.7126	16.924	25.7925	19.5209
BjuVB07G23540	1	4.69529	4.88723	8.76989	12.2093	14.3549
BjuVB02G64160	1	5.40046	6.32099	9.5995	15.8277	17.5669
BjuVA07G18630	1	4.07372	4.01315	6.05966	13.1603	9.8005
BjuVB05G29700	1	0.151638	0.183587	0.378784	3.13118	2.90989
BjuVA08G21590	1	6.82533	5.73064	14.7279	18.51	22.953
BjuVA03G26190	1	2.76775	4.00867	3.82003	9.62423	10.6743
BjuVB04G01960	1	12.276	12.5308	23.2501	29.1038	33.7816
BjuVB08G07550	1	34.2578	32.1115	60.2144	68.8378	79.6235
BjuVB03G29630	1	4.2776	2.70046	7.92973	13.1317	14.4613
BjuVB02G41860	1	3.04854	5.85424	7.65882	10.8029	10.7548
BjuVA09G08720	1	0.202635	0.579146	0.586896	3.01021	2.61518
BjuVA07G40910	1	2.32498	1.99314	2.88732	7.0949	5.27456
BjuVA04G17910	1	0.152087	0.136112	1.16999	3.72132	2.33538
BjuVA07G31310	1	0.968283	2.66453	2.57068	4.41234	3.67863
BjuVB05G37560	1	3.25736	4.03562	4.55498	10.2575	9.70384
BjuVB02G11820	1	2.00733	1.95452	4.10297	8.43798	9.65274
BjuVA02G40190	1	0.444699	0.72028	1.17539	2.95899	2.30846
BjuVB02G63800	1	11.4705	5.56411	18.637	29.1716	37.0388
BjuVB04G42700	1	3.21372	5.56043	8.53103	19.529	19.1083
BjuVB06G54390	1	4.70915	5.47124	6.35804	12.9968	11.4932
BjuVA05G07640	1	0.563365	1.93549	1.8053	3.305	2.98231
BjuVB08G14060	1	0.909482	0.855124	2.38085	5.34571	6.41775
BjuVA10G31770	1	5.58431	3.86476	7.10753	11.8138	14.3707
BjuVB04G02160	1	0.123094	0.952905	1.38802	3.56815	3.26835
BjuVA01G37400	1	1.0606	1.25634	1.80659	3.5779	3.68777
BjuVB07G34850	1	0.0610404	0.160967	0.645918	2.76406	1.85318
BjuVB01G05950	1	1.46232	2.33609	2.79965	4.1976	4.07986
BjuVB01G31890	1	1.94203	0.556748	4.22625	6.78731	7.73489
BjuVA09G20500	1	0.202355	0.0724862	1.27747	3.90655	4.26826
BjuVB08G20500	1	0.19852	0.197679	0.470098	2.08586	1.39348
BjuVB05G17820	1	10.5927	13.1141	14.9785	23.7613	19.7978
BjuVB05G13350	1	30.6298	45.7581	55.1431	73.6481	63.3121
BjuVB03G08330	1	0.127164	0.0836103	0.620249	1.65208	1.99914
BjuVA06G09910	1	6.29564	7.98436	13.1685	16.412	17.1894
BjuVB02G56640	1	7.07608	4.89309	14.7294	19.9224	25.3689
BjuVB06G17240	1	2.07291	1.58665	3.65399	5.24523	5.91556
BjuVB06G16110	1	0.88625	0.720697	2.71154	3.34443	4.13501
BjuVB01G18160	1	0.262022	0.292842	0.510222	1.71539	1.23839
BjuVB06G56570	1	7.80524	6.73285	14.4386	17.4108	20.6089
BjuVA02G02500	1	2.60812	1.11089	3.57401	8.33273	9.47669
BjuVA03G45070	1	3.58898	3.59726	5.6521	12.0392	8.66031
BjuVB05G25140	1	3.83089	4.78849	5.18009	10.1631	11.4926
BjuVB03G54820	1	0.0694472	0.12397	0.303882	1.82621	1.50282
BjuVA01G05020	1	2.00437	1.82081	1.23898	4.89952	4.55217
BjuVB02G75010	1	1.05156	1.70463	2.76942	4.11754	4.72518
BjuVA05G08920	1	0.0172708	0.51624	0.531485	1.64716	1.25672
BjuVA03G27220	1	0.640231	1.29852	1.16297	4.71968	4.23628
BjuVA07G23450	1	0.0504646	0.150629	1.01942	10.9352	8.91876
BjuVA09G07450	1	8.27801	5.73039	23.3712	78.1396	51.0101
BjuVB01G02120	1	1.40269	1.67998	3.14823	7.00734	5.12301
BjuVB04G07800	1	1.66553	1.64642	1.37472	6.77443	5.2387
BjuVB03G32130	1	0.141119	0.538837	0.246845	2.10506	1.93449
BjuVA05G41370	1	2.98883	2.35103	2.23355	6.78791	6.00198
BjuVB08G46540	1	2.84928	2.10168	5.35163	7.87584	9.51277
BjuVA02G19610	1	52.3682	28.6523	75.5348	105.929	129.654
BjuVA05G34030	1	2.71411	1.44573	1.99953	8.38146	6.35873
BjuVA04G24430	1	21.5058	22.365	24.0226	48.5323	38.8914
BjuVB05G12680	1	5.63156	5.67758	9.46829	15.1749	17.6842
BjuVA05G30420	1	6.88254	4.07203	13.1381	14.4391	18.5874
BjuVB08G39650	1	4.54179	4.38459	10.7529	14.2987	18.0827
BjuVA09G62320	1	2.48836	2.38087	8.2278	10.8521	12.3373
BjuVB05G03560	1	0.213855	0.403159	0.644606	2.00773	1.35952
BjuVB07G16670	1	3.97751	3.07757	7.53893	13.8148	17.5728
BjuVA10G13860	1	2.69654	3.14942	3.53964	5.9549	5.05316
BjuVA04G04770	1	0.727026	0.512617	2.09086	3.04867	3.86598
BjuVA07G37410	1	2.13705	1.13641	21.3902	51.4981	58.1009
BjuVA02G28590	1	6.37835	3.76146	14.0687	17.1511	23.0315
BjuVB01G45290	1	4.68205	2.89521	9.42809	11.8894	14.7367
BjuVB04G07660	1	2.29242	0.957727	3.85758	6.09029	7.16813
BjuVB06G33860	1	2.68742	1.42952	7.21183	8.16533	10.6067
BjuVA08G24310	1	0.193562	0.856477	1.32876	1.93152	1.96434
BjuVA05G42840	1	1.48358	2.13568	2.29527	3.65748	3.35273
BjuVA08G27030	1	13.5693	18.3497	19.2851	29.8381	26.8222
BjuVB01G36040	1	2.50974	3.43642	4.92142	10.308	11.6797
BjuVA07G45280	1	0.526553	0.522427	1.1651	2.79551	3.59655
BjuVA03G62070	1	0.505584	1.40118	1.60469	1.98115	1.9579
BjuVB04G47760	1	0.0894005	0.156929	0.419159	1.19681	1.31757
BjuVB08G41760	1	3.5246	3.91936	3.49374	8.61883	9.55535
BjuVA08G22240	1	4.23864	2.59886	7.34175	10.0234	11.746
BjuVB02G25580	1	0.0770345	0.271197	0.509227	2.06749	1.40017
BjuVB03G43000	1	2.44024	2.03789	1.69736	6.65468	5.85647
BjuVA06G02640	1	1.79428	1.91829	2.16745	5.12553	5.63406
BjuVB08G20020	1	0	0.351362	0.0963681	1.59671	1.46515
BjuVA04G17760	1	0.106955	0	1.13482	1.45195	1.49792
BjuVA06G16860	1	3.68847	2.75852	6.05296	9.55096	11.1902
BjuVA06G30230	1	5.85232	5.13942	7.42036	11.7759	13.8984
BjuVA01G37030	1	0.231947	1.87889	1.96186	2.44607	2.4709
BjuVB04G40150	1	0.162935	0.236756	0.787122	2.70118	3.43534
BjuVA03G40990	1	2.46682	1.4042	3.72818	5.37542	6.7955
BjuVB02G54570	1	1.08964	1.10757	1.092	2.92485	2.47816
BjuVA05G30870	1	1.58117	3.85992	3.45499	5.73001	4.86025
BjuVA06G19000	1	10.9236	12.9291	16.5517	22.5877	25.8376
BjuVA10G21630	1	1.71915	1.36447	1.4464	6.06749	6.98593
BjuVB07G25080	1	0.900836	1.22655	2.46916	4.474	5.59178
BjuVB05G04500	1	3.3024	3.71092	6.69379	8.57943	9.18932
BjuVA06G39880	1	0.524759	0.525618	0.551016	1.63613	1.35814
BjuVA09G03340	1	0.625989	0.277996	1.06824	2.2564	3.02296
BjuVA09G57420	1	4.41194	6.81984	6.19142	12.2907	13.2634
BjuVB05G15880	1	2.03594	3.17953	2.86335	4.92675	4.44885
BjuVB02G26680	1	1.13718	1.34293	1.66175	8.07959	6.08341
BjuVA04G30650	1	8.12209	8.62145	20.397	23.0914	24.975
BjuVB03G07820	1	4.39552	2.70728	8.88704	9.18908	12.1312
BjuVB03G15550	1	2.3779	2.20871	3.10414	5.41095	6.16597
BjuVA09G37130	1	62.2662	99.0976	83.8711	145.87	146.787
BjuVB01G40660	1	3.49672	5.3935	6.5603	13.0155	15.3119
BjuVB02G25840	1	5.91524	5.89602	6.39541	12.4673	13.7517
BjuVA01G02210	1	11.6542	8.25215	17.3449	23.9229	29.5958
BjuVB06G32420	1	2.55057	1.95567	4.54468	7.49065	9.0942
BjuVA07G40680	1	5.24782	4.73053	7.71401	11.5421	14.0038
BjuVB01G46150	1	9.20501	10.5187	10.2477	19.1026	16.344
BjuVB03G17300	1	1.63784	2.94948	2.84639	4.18282	3.97051
BjuVA09G01710	1	0.285673	0.514859	1.54182	2.63039	3.12951
BjuVB06G15550	1	4.66339	5.28333	8.11075	10.052	11.7812
BjuVA06G12200	1	0.371798	0.519056	1.0516	2.63373	3.27813
BjuVB07G33070	1	0.114609	0.455857	1.11531	2.31055	2.75926
BjuVB04G22940	1	5.7787	5.65667	9.05969	11.6875	13.5919
BjuVA01G01040	1	1.05987	0.544106	1.74566	3.31031	4.40732
BjuVA06G33720	1	0.407906	0.436267	1.13313	1.6125	1.85219
BjuVB07G01750	1	0.0234583	0.120632	0.144661	0.974479	1.10847
BjuVA07G11700	1	0.0561781	0.255245	0.933946	2.2863	2.68227
BjuVA01G09230	1	2.97408	1.12419	4.49584	6.48872	8.83667
BjuVA08G13740	1	0.0354393	0.302833	0.140469	1.32624	1.225
BjuVA03G11070	1	0.21	0.263528	0.206554	1.08848	1.238
BjuVB08G52030	1	11.7505	13.9342	15.8125	24.9768	27.2411
BjuVB04G46630	1	0.290248	0.24176	0.481354	1.29603	1.50047
BjuVB03G26190	1	1.46489	1.46024	1.80901	3.16389	2.50502
BjuVB01G45280	1	3.33215	3.60636	6.96359	6.72841	7.73696
BjuVA10G03350	1	0.327049	0.555933	0.504851	1.04576	0.868707
BjuVB07G32140	1	0.62176	1.16564	0.961128	1.33107	1.30275
BjuVA09G61430	1	1.26132	2.57597	2.9474	3.89482	3.80549
BjuVB06G37810	1	0.276711	0.220946	0.875298	1.45142	1.75611
BjuVA06G43000	1	3.14645	4.26607	5.1637	6.42212	6.61918
BjuVA04G00520	1	0.313428	0.970174	1.31693	1.54376	1.73374
BjuVA08G25800	1	2.3297	3.39662	3.08803	5.00078	5.46289
BjuVB03G02120	1	0.0313052	0.013759	0.418265	0.500205	0.588111
BjuV_Contig00925G00240	1	0.532985	1.13271	1.21511	1.94458	2.03007
BjuVA02G16750	1	0.100924	0.20005	0.960445	0.948036	1.1995
BjuVA08G35350	1	3.10648	2.03864	4.01045	6.2406	7.34998
BjuVB03G47780	1	0.465775	0.697298	1.94191	2.03579	2.23945
BjuVA04G16260	1	2.76212	1.42165	5.77301	5.84768	7.40776
BjuVB06G07020	1	1.01859	1.89756	1.41888	3.4689	3.83715
BjuVB05G05180	1	0.980872	1.03738	1.4473	3.49284	4.05941
BjuVA04G31520	1	2.35174	3.22502	3.35163	6.62826	7.48703
BjuVB02G37200	1	1.29926	0.89055	1.60245	3.55256	4.54044
BjuVA06G06410	1	2.26009	2.45975	1.4863	4.93101	5.03104
BjuVB05G29570	1	0.0158884	0.0818394	0.0148653	0.459893	0.384166
BjuVB08G21000	1	0	0	0.14606	2.75414	2.95372
BjuVB02G73610	1	8.11589	14.4291	13.0317	44.8252	35.2125
BjuVA01G01830	1	1.24057	0.766241	0.948916	15.2149	11.427
BjuVB03G39160	1	11.3542	7.99686	23.1165	22.7253	29.9948
BjuVB03G12890	1	17.6752	9.14119	28.5526	32.7556	44.2849
BjuVB01G47080	1	42.7081	29.2505	72.1963	80.0834	104.595
BjuVA04G04840	1	2.32292	1.39937	3.41764	4.51065	5.92318
BjuVB02G63900	1	10.4178	7.97286	18.0803	20.28	25.5333
BjuVA10G34050	1	17.274	21.3384	19.187	77.3555	58.6759
BjuVB08G12500	1	2.76658	1.38612	5.64681	5.47075	7.41322
BjuVA04G24630	1	0.782123	0.374367	1.80098	2.15886	2.9939
BjuVB08G25950	1	17.6207	10.0536	23.4041	31.7901	39.1721
BjuVA07G06370	1	8.20726	4.24985	14.7643	14.1677	19.071
BjuVA09G46180	1	4.15953	3.64227	6.09972	8.10984	9.71817
BjuVA01G13300	1	9.72708	6.27951	14.0736	18.0026	21.8976
BjuVA05G38430	1	0.118553	0.143865	0.466395	0.930003	1.20665
BjuVA06G15340	1	78.8556	151.173	139.952	164.085	160.831
BjuVA01G11420	1	10.1085	9.13299	13.5061	20.0051	24.6843
BjuVB04G22180	1	1.29916	0.521092	3.16234	2.61539	3.48919
BjuVA03G32540	1	28.5491	28.1198	31.7146	54.5061	60.5322
BjuV_Contig00477G00040	1	0.211332	0.450457	0.465679	1.17455	1.39739
BjuVB06G44180	1	30.0146	158.11	563.26	690.017	944.704
BjuVA03G63340	1	10.4903	1.6076	20.8541	26.3153	37.9448
BjuVB02G45740	1	11.5932	1.93662	18.5196	11.6451	17.1748
BjuVB02G13280	1	6.77699	0.605003	11.679	20.1207	28.0465
BjuVB06G26580	1	0.454753	6.4966	14.9359	20.7664	26.1878
BjuVA01G17800	1	60.9035	19.7691	133.443	118.511	157.078
BjuVB03G38830	1	23.2775	7.82054	54.1534	37.0388	54.3919
BjuVB08G20450	1	1.90743	9.83485	11.9299	14.066	15.2546
BjuVB02G59130	1	19.033	3.93165	30.0655	25.5509	36.9044
BjuVA07G26520	1	76.0216	155.896	488.937	555.807	760.902
BjuVB02G12710	1	27.3749	11.3559	30.2228	27.203	35.6772
BjuVB05G56940	1	3.25745	12.0464	14.8086	23.6627	26.497
BjuVA10G31870	1	15.7471	6.18203	20.7519	19.7178	25.8232
BjuVB04G35830	1	94.6812	34.3103	207.13	273.508	370.079
BjuVA07G37280	1	28.7107	62.031	137.469	213.774	249.356
BjuVB03G17520	1	176.817	82.6717	230.514	219.03	277.963
BjuVB05G07270	1	0.966576	5.98948	7.03844	10.8804	11.5661
BjuVB02G10800	1	15.6307	7.28773	24.7154	21.6958	29.1671
BjuVB03G44990	1	6.26787	50.5907	386.877	758.442	975.007
BjuVA02G23170	1	6.10322	2.89834	9.35578	10.4266	13.332
BjuVA07G14920	1	10.2873	4.31328	12.8042	11.9768	15.9566
BjuVA07G44630	1	4.7089	1.85166	7.21192	6.70555	9.00606
BjuVA02G11840	1	14.8823	35.5299	21.5842	52.6332	57.6566
BjuVA05G07500	1	17.3019	7.46822	24.2684	22.4257	29.9389
BjuVB04G01210	1	8.34129	2.89004	17.5616	24.5234	31.4271
BjuV_Contig01019_ERROPOS2684367G00080	1	1.75321	0.455423	3.15518	3.22375	4.42064
BjuVA01G25930	1	18.1167	7.49169	18.0852	25.3772	32.8776
BjuVA02G29430	1	8.88564	3.29807	27.7061	43.5711	55.023
BjuVB04G03430	1	0.607488	3.41852	201.737	528.09	675.103
BjuVB06G54260	1	6.45717	2.52838	12.2946	15.2951	20.7009
BjuVB05G50510	1	0.698094	1.94708	30.5662	85.5341	105.408
BjuVB04G03960	1	22.6771	36.5591	147.435	229.605	284.355
BjuVB04G04200	1	23.6787	39.2438	136.13	182.978	233.815
BjuVB03G20080	1	8.11904	14.7787	64.1962	78.4397	100.266
BjuVA09G19260	1	1.36195	1.32878	14.653	34.0692	44.0638
BjuVA02G44620	1	11.3051	15.8471	60.8709	86.2868	120.3
BjuVA05G10290	1	1.41776	0.807121	17.7948	31.6639	44.6986
BjuVB04G04260	1	4.13833	8.44447	26.4523	50.0187	65.4089
BjuVA08G01350	1	1.1946	4.55386	21.6158	41.3554	50.7181
BjuVB03G07760	1	4.39952	5.06227	23.1858	41.6937	59.4594
BjuVA08G31360	1	0.648883	2.50508	7.37123	23.3744	28.8627
BjuVB01G17760	1	0.10029	0.728322	4.12671	10.8665	14.5545
BjuVB01G19670	1	2.87461	1.79994	15.0823	14.2416	20.3464
BjuVB07G35410	1	14.8696	8.68675	54.6252	72.8686	97.0065
BjuVB02G49460	1	9.95941	9.72843	34.6045	57.7271	79.6264
BjuVB04G28530	1	2.1687	3.00008	9.77451	11.6539	14.294
BjuVB02G13510	1	179.238	100.718	539.317	358.285	515.69
BjuVA03G28700	1	74.5243	80.8923	188.982	233.3	303.858
BjuVA01G16940	1	1.75498	2.89317	8.87198	13.9619	18.5076
BjuVB07G37590	1	0.73959	1.26311	4.05474	4.4221	5.80136
BjuVA03G40640	1	8.98894	15.6064	36.8982	40.2947	48.9447
BjuVA02G44650	1	17.786	28.6957	48.4989	104.835	122.649
BjuVB01G23120	1	69.9287	92.6045	205.473	255.1	338.545
BjuVA06G01900	1	6.88596	3.6379	23.3524	25.3393	35.57
BjuVA03G45970	1	0.342549	0.811558	3.09173	3.93341	5.19606
BjuVB07G28210	1	13.3396	19.1076	39.4975	36.2472	43.1006
BjuVB06G35690	1	5.32789	6.29159	14.281	19.8948	25.3828
BjuVA06G01600	1	0.519008	0.565963	3.73867	18.0416	23.2927
BjuVA01G42500	1	0.226269	0.508398	2.91788	5.31196	6.96106
BjuVB01G40370	1	169.133	157.051	388.686	408.785	527.765
BjuVA07G12060	1	3.46317	3.3424	10.8032	14.3096	18.8936
BjuVB08G11050	1	3.46295	1.92032	12.8373	13.0658	19.0337
BjuVB01G41290	1	4.82027	2.47681	17.765	26.7061	37.9813
BjuVB01G04570	1	4.99709	3.8563	14.022	19.5862	25.972
BjuVA03G04780	1	79.3943	52.2592	173.317	213.289	277.581
BjuVA03G36220	1	4.98386	2.48063	18.0308	17.0714	23.638
BjuVB02G65560	1	3.72505	3.6749	10.9657	34.8053	45.5138
BjuVB07G48630	1	0.0529793	0.587359	5.01636	6.20778	9.17677
BjuVB06G40600	1	0.0284961	0.387901	2.8342	2.53229	3.69637
BjuVA03G15150	1	2.67098	2.58985	9.01606	16.055	21.5139
BjuVA07G29830	1	5.9052	3.89395	14.9724	16.6039	22.2153
BjuVB08G11390	1	4.75054	3.28269	12.5281	13.4593	18.1306
BjuVB07G46090	1	32.9253	20.8866	72.24	69.128	90.6563
BjuVA04G30720	1	5.71475	4.88676	15.1989	20.0434	25.4037
BjuVA02G13410	1	0.741681	1.63117	4.67874	4.73138	6.49812
BjuVA02G46410	1	1.99086	3.02263	6.06739	4.17498	5.06073
BjuVA06G19010	1	0.138626	0.0301522	1.43815	3.37024	4.98492
BjuVB07G02700	1	4.41061	2.6677	16.0352	30.9562	41.182
BjuVA08G24850	1	5.96321	3.67474	13.5994	15.2057	20.6798
BjuVB06G57940	1	0.137285	0.0674063	1.17416	1.30116	1.99548
BjuVB03G30220	1	0.0677403	0.867123	4.06901	7.61738	10.5596
BjuVA04G30640	1	4.20022	3.76008	12.1274	13.4817	18.0908
BjuVB03G43380	1	13.0322	14.7148	30.5921	57.9079	76.2852
BjuVB03G45210	1	0.818425	2.12146	4.41644	12.3752	17.2831
BjuVB01G43080	1	8.84932	6.13234	21.5394	28.1886	36.8073
BjuVB03G22000	1	0.419927	0.428457	2.05466	2.373	3.17467
BjuVA04G18830	1	46.003	48.5009	87.2028	137.829	181.468
BjuVA01G44490	1	4.75689	7.39561	6.86431	22.097	16.5006
BjuVB08G04130	1	0.25004	1.56052	0.963974	7.70939	9.01785
BjuVB04G18090	1	17.2366	27.7718	22.9177	60.9115	48.8321
BjuVA06G01780	1	0.303307	1.24151	1.28199	4.64413	5.85171
BjuVA01G11250	1	6.6551	3.56218	12.4134	21.0446	29.2975
BjuVA10G25430	1	0.0390901	0.621091	0.673907	4.41639	5.44845
BjuVB02G30850	1	36.189	41.903	69.093	91.1345	113.959
BjuVB02G54650	1	1.46461	1.5559	3.52231	6.0961	7.6289
BjuVB06G02930	1	0.804407	0.666374	1.61292	7.3293	9.89093
BjuVB08G25540	1	2.22506	1.76216	5.42107	8.80595	11.5339
BjuVB01G45050	1	26.7257	29.5313	39.0831	67.1072	80.8164
BjuVB03G46380	1	3.04436	3.56817	3.25865	12.3092	15.2164
BjuVA05G27670	1	0.874371	1.54085	2.72021	4.23007	5.25916
BjuVA05G32000	1	13.1602	6.82092	24.6919	30.9332	41.4452
BjuVB02G37190	1	0	0.103387	0.239067	3.04423	4.11177
BjuVA08G19470	1	7.74715	5.59883	13.0839	24.322	33.2517
BjuVB01G29920	1	19.9898	14.3806	23.319	43.9762	56.4937
BjuVA01G12610	1	0.137543	0.632454	0.319139	2.2345	2.75014
BjuVB05G48370	1	7.77029	6.84072	13.2748	19.8212	26.2782
BjuVB04G32190	1	0.120914	0.127495	0.688651	2.10595	2.79463
BjuVB03G20760	1	1.39791	2.87881	1.63233	5.34189	5.01869
BjuVB08G50830	1	17.4083	13.5715	28.7871	44.4986	56.439
BjuVB06G22320	1	1.99934	4.74276	5.51752	12.4171	14.746
BjuVA10G29750	1	1.38895	1.09409	3.13867	5.6473	7.91517
BjuVB02G53370	1	0.786975	0.445556	1.4647	4.2151	5.71154
BjuVB01G36460	1	10.1546	6.63828	19.2213	20.4807	27.7573
BjuVA04G04680	1	2.66892	1.31128	5.2702	10.5463	14.6861
BjuVB02G60380	1	0.785695	0.800703	0.382394	4.75513	3.46715
BjuVA08G28280	1	7.07602	9.37232	7.51106	16.8938	15.1327
BjuVA07G25990	1	7.37747	7.68166	7.22016	20.599	25.2499
BjuVA03G20900	1	3.41065	5.35344	2.46851	12.0967	15.0089
BjuVB03G10680	1	4.45849	4.05727	7.85224	13.3393	17.3444
BjuVA03G63260	1	1.30123	0.845998	2.42192	5.23164	6.94016
BjuVA02G02010	1	0.649598	1.73753	0.708195	4.19863	5.35299
BjuVA05G09320	1	0.463648	0.122286	0.580316	2.34895	3.45072
BjuVB05G53190	1	0.0552313	0.202103	0.229551	1.96323	2.64993
BjuVB03G43600	1	7.27525	4.83202	12.1453	15.627	21.6603
BjuVA05G03710	1	0.117909	1.71193	0.9347	3.99838	5.19889
BjuVA06G00680	1	2.07004	2.01876	4.50501	4.66272	6.2474
BjuVA02G09780	1	11.7938	12.6599	19.5537	25.4491	30.9923
BjuVA02G11940	1	5.93805	7.88931	6.21984	15.5854	13.2503
BjuVA06G19440	1	1.22559	0.783666	3.94513	5.73535	8.39885
BjuVB02G65530	1	2.1649	1.02326	4.06101	5.18766	7.14871
BjuVA09G56960	1	17.8819	28.0633	29.5772	38.3016	44.4354
BjuVA10G04440	1	7.30411	7.13223	10.229	16.6496	20.3078
BjuVA03G36440	1	2.00348	3.88683	4.51339	6.21391	7.05477
BjuVA05G43860	1	8.76392	6.68253	12.5627	22.3464	29.4367
BjuVB08G01300	1	3.01722	3.64377	6.22759	6.69568	8.33222
BjuVA01G16270	1	4.30008	4.71634	6.49465	13.1521	17.3532
BjuVB01G12690	1	0.0639079	0.204296	0.364748	1.66464	2.22872
BjuVA07G38530	1	0.0674908	1.56078	0.30217	6.33424	4.65054
BjuVA07G22960	1	7.26822	2.59368	14.3105	24.155	36.3928
BjuVB04G18460	1	0.284103	1.41699	0.567576	2.26378	2.13465
BjuVB01G47440	1	7.31596	11.4853	7.28489	15.2891	15.1209
BjuVA05G34240	1	0.688301	0.302515	2.23423	2.9231	4.2761
BjuVA03G54460	1	3.06158	3.76757	3.36303	7.71566	6.30681
BjuVB06G54270	1	0.437736	0.251647	1.50612	2.11985	3.22069
BjuVB02G63890	1	10.4436	7.78389	17.0967	22.2533	30.3862
BjuVA04G33250	1	1.0711	1.3154	3.1038	4.10799	5.37039
BjuVB02G69330	1	0.111417	0.0475087	1.04576	2.3175	3.42896
BjuVA03G16770	1	0.345465	1.06025	0.864959	2.02942	2.42588
BjuVA07G26300	1	0.49966	1.32353	1.14646	2.13419	2.44433
BjuVA03G05080	1	0.670811	2.05304	0.936946	2.93953	3.25783
BjuVB06G21180	1	4.98699	5.62765	6.99595	10.1583	12.7659
BjuVA03G02030	1	13.7601	15.7273	11.4165	28.317	25.0931
BjuVA02G20370	1	0.234067	0.684384	0.633853	1.21433	0.938739
BjuVB05G24040	1	0.294579	0.663592	0.336511	1.76742	1.37182
BjuVA10G11280	1	2.86537	2.48827	3.25625	5.83877	7.55087
BjuVB05G44540	1	0.334975	0.258303	0.51599	2.04497	2.79945
BjuVB01G14800	1	1.04664	0.57497	2.56018	3.3286	4.84192
BjuVB05G16870	1	8.50078	7.65573	7.65743	17.9342	21.8271
BjuVB01G42100	1	0.251997	0.304577	0.196627	1.73601	2.36576
BjuVA03G64690	1	0.908462	1.70247	1.34662	2.76679	2.36364
BjuVB05G00220	1	0.642828	0.309227	1.28823	1.46663	2.11443
BjuVA08G24700	1	7.72271	4.46277	10.0688	15.0845	21.2321
BjuVA03G26930	1	22.8549	16.2286	37.828	38.7152	51.7415
BjuVB02G51860	1	7.26064	7.3771	9.02251	14.2823	18.276
BjuVA03G47610	1	27.3716	24.605	48.0885	47.1638	59.4408
BjuVA05G15290	1	12.0363	7.26976	20.9877	19.8669	27.4394
BjuVA10G04500	1	6.67596	6.18996	6.50591	12.5552	15.3796
BjuVA06G37280	1	1.3748	0.321694	1.46709	2.81854	4.23101
BjuVB04G12160	1	7.54688	5.65774	9.7012	12.5403	16.4016
BjuVB01G14080	1	14.6205	13.0879	24.4007	24.7629	31.8473
BjuVA10G02190	1	5.94549	4.13699	7.88695	10.5933	14.0912
BjuVA09G10280	1	4.66448	3.41627	7.06082	8.39896	11.026
BjuVB07G08260	1	28.033	28.7037	40.4742	48.2635	58.6872
BjuVB03G31010	1	0.0163353	0.421122	0.102542	0	0.787173
BjuVA07G14850	1	6.17975	4.7927	10.9279	10.4675	13.9507
BjuVA09G41100	1	4.26481	2.11581	9.10714	7.17643	10.175
BjuVA03G20080	1	13.501	64.7798	72.5587	84.7048	101.359
BjuVB02G55460	1	6.8218	0.440933	16.4519	12.3318	19.2116
BjuVA05G18070	1	35.972	12.7877	48.7625	74.1172	107.781
BjuVA07G10160	1	16.9361	3.55065	15.8206	18.3184	25.9071
BjuVB04G47370	1	107.629	260.918	355.077	592.043	753.847
BjuVB06G50100	1	3.43644	15.9477	34.546	51.9253	70.7327
BjuVB01G07830	1	1.47598	6.00547	32.6595	33.3689	49.1982
BjuVA05G34880	1	17.4521	6.73865	22.4886	31.5122	44.9622
BjuVA03G00240	1	199.62	88.5866	157.77	227.634	293.282
BjuVB08G54710	1	6.27064	1.9777	7.68839	12.7626	18.996
BjuVB02G62350	1	29.2099	14.0293	41.332	46.5176	63.4295
BjuVB07G08860	1	3.29937	7.35158	5.36765	15.2956	19.3229
BjuVB04G46530	1	0.0457198	1.40482	9.45258	48.5943	70.4082
BjuVA02G27110	1	18.7394	8.59333	24.1265	26.2969	36.0204
BjuVA07G31220	1	2.01676	7.1852	20.4915	52.0356	78.9331
BjuVB01G42430	1	3.45391	1.01495	5.47035	5.85003	8.70652
BjuVA02G12470	1	3.32732	13.3572	93.3904	109.669	170.348
BjuVB02G08430	1	33.8205	31.3283	296.452	348.456	551.313
BjuVA02G45000	1	17.3999	22.93	82.7079	121.062	173.635
BjuVA07G29330	1	4.21849	6.22952	24.0407	51.4766	76.6252
BjuVA03G45980	1	7.03975	10.6401	32.6391	21.7958	30.0577
BjuVB03G32800	1	1.61384	1.67689	9.5804	18.3395	28.58
BjuVA05G03740	1	0.256626	1.67296	14.3912	47.3574	73.1959
BjuVA05G18590	1	2.13184	3.4378	9.23864	14.6532	21.095
BjuVA02G24040	1	22.4207	25.852	62.9662	61.2115	82.0086
BjuVA09G16760	1	3.85103	1.37314	15.9324	25.1252	39.2105
BjuVA05G42530	1	0.715105	0.949317	6.05015	13.0478	20.7449
BjuVB06G37910	1	0.27914	0.916629	3.69024	14.5832	21.1047
BjuVA01G00910	1	32.6486	58.3239	84.2717	74.5121	88.3612
BjuVB04G32290	1	28.8639	19.2268	75.7402	59.8457	87.9357
BjuVB08G52830	1	2.76981	1.43164	8.00006	10.0905	14.7548
BjuVA07G29600	1	0.786356	2.71096	4.73494	8.84976	12.9047
BjuVA07G18530	1	0.0693128	0.525496	1.36275	9.43215	13.9197
BjuVB08G17230	1	2.50532	5.20383	8.4939	16.7903	22.8618
BjuV_Contig00863G00240	1	0.259778	1.35685	2.46315	5.74189	8.48062
BjuVB03G12120	1	2.25292	2.303	7.4882	6.61934	9.49868
BjuVA06G05340	1	4.73016	4.59019	13.0305	21.2149	30.4968
BjuVB05G15270	1	2.23861	4.26727	4.69671	14.8306	20.4893
BjuVA08G37030	1	6.55084	6.5058	12.2456	43.8998	65.1095
BjuVB08G17120	1	4.59189	5.57819	15.607	41.982	62.9876
BjuVB02G64540	1	4.29508	6.10214	10.1624	17.7311	25.2423
BjuVA03G09730	1	24.9958	27.6101	44.88	61.0171	80.833
BjuVB07G03820	1	2.73004	4.68654	5.95462	12.5902	17.0902
BjuVB04G05880	1	0.886585	1.46619	0.824885	6.92529	9.96087
BjuV_Contig00580_ERROPOS930405+G00330	1	76.8292	57.166	136.658	158.584	219.829
BjuVB03G27730	1	4.16032	4.22715	7.12316	11.0216	14.8747
BjuVA05G34910	1	0.118746	0.144988	0.270679	1.46103	2.12085
BjuVA10G22170	1	3.27854	5.7529	4.51682	8.85644	10.5207
BjuVA06G08760	1	1.65074	1.00747	2.17553	6.82645	9.84368
BjuVB04G02460	1	8.62656	9.32655	15.1396	18.1334	24.1628
BjuVA06G00080	1	0.3318	0.571676	1.22076	117.675	184.157
BjuVB07G20720	1	1.24479	1.48404	2.10593	4.29647	6.04428
BjuVB03G05670	1	2.66876	3.30799	3.7916	8.536	11.8665
BjuVA03G25810	1	0.331619	0.374721	1.13824	2.22805	3.31436
BjuVA10G12260	1	11.8334	9.96189	19.1657	26.8267	37.8733
BjuV_Contig00807G00060	1	14.6243	22.4639	14.9846	29.9174	35.1339
BjuVB01G38890	1	19.1907	12.0321	34.3033	41.3704	58.9746
BjuVA09G26120	1	2.91919	2.35067	5.51482	6.78764	9.70833
BjuVB06G40040	1	3.0639	1.63513	3.86965	6.28356	9.09833
BjuVB08G54540	1	3.27589	3.2221	4.89487	8.59827	12.0365
BjuVB03G57290	1	0.952549	0.639285	3.28579	5.24544	8.14787
BjuVB02G70430	1	4.17425	4.80096	8.82491	9.78401	13.2433
BjuVB04G04240	1	0.0362774	0.082905	0.337644	0.967123	1.56524
BjuVA02G23540	1	2.12744	1.05623	4.80975	5.03968	7.62427
BjuVB08G31090	1	0.157962	0.137987	0.763386	1.12785	1.72857
BjuVB02G64670	1	1.32207	1.27376	2.0124	3.55747	5.06682
BjuVA01G16110	1	1.62463	1.28278	2.32642	4.61963	6.68873
BjuVB06G35420	1	1.17034	0.693199	0.969619	4.77796	7.31933
BjuVB06G12800	1	1.93929	0.894794	4.53183	5.67654	8.77127
BjuVB05G44740	1	1.38904	2.84161	1.8189	2.86114	2.92971
BjuVA03G21480	1	1.7876	1.63093	2.01729	5.06406	7.07424
BjuVB06G06330	1	0.682969	0.279545	1.49781	2.17398	3.45338
BjuVB02G67130	1	3.55231	4.92493	5.95249	7.28295	8.98879
BjuVA04G00900	1	0.120136	0.878665	1.81471	2.43298	3.5649
BjuVB06G19480	1	2.57675	3.63946	3.59025	5.36945	6.50472
BjuVA03G51130	1	2.55924	1.06471	5.26985	5.31618	8.24022
BjuVB05G04620	1	0.196844	0.223828	0.205942	2.55478	3.88784
BjuVB06G13660	1	0.697493	0.65236	1.62569	1.8415	2.65898
BjuVB04G14940	1	1.66991	1.44269	2.84353	4.15387	6.00731
BjuVB03G32850	1	34.0909	36.9531	54.0448	64.6949	84.0755
BjuVA03G56290	1	23.7658	26.8874	29.6848	46.2631	58.722
BjuVB06G20670	1	15.6084	8.14543	25.7631	26.3987	38.2741
BjuVB08G32680	1	15.4839	12.0277	24.4566	28.2458	38.708
BjuVB05G28600	1	9.7193	7.82733	15.4584	17.3051	23.924
BjuVB06G04160	1	0.269412	1.1492	0.863742	1.37771	1.59051
BjuVB07G18890	1	8.27031	8.44454	16.0159	16.2512	22.0382
BjuVA08G20640	1	9.8313	8.0553	12.4176	16.6765	22.4414
BjuVA09G00120	1	6.37881	4.24798	8.68884	11.3978	15.7028
BjuVB08G44440	1	3.56719	2.98077	3.60263	7.72186	10.8455
BjuVB01G39320	1	1.02708	0.9426	1.74325	2.23564	3.10156
BjuVB03G29000	1	1.24639	1.29575	1.90931	3.52669	4.90542
BjuVB04G45350	1	2.27443	0.95915	3.08388	3.91519	5.86785
BjuVA10G13410	1	14.8568	17.3999	23.5713	26.7313	33.9415
BjuVA04G12710	1	19.5523	18.4958	31.0577	32.3997	41.9839
BjuVB07G32240	1	0.265528	15.4972	2.4974	80.5599	127.141
BjuVB05G45930	1	13.5669	5.73452	16.562	16.8555	23.6872
BjuVA04G31460	1	8.12926	2.89812	9.71602	11.6985	17.2244
BjuVB01G37130	1	23.5195	11.2676	43.8149	50.9024	76.4413
BjuVB06G11730	1	6.68941	3.05745	9.47515	8.0234	11.2488
BjuVB02G63650	1	7.293	3.26847	8.63904	9.39121	13.0956
BjuVB05G54190	1	36.4386	74.8063	157.725	171.359	249.176
BjuVB02G75210	1	12.665	26.502	37.4546	31.3417	37.7134
BjuVB06G12310	1	1.64833	4.37641	7.16437	7.43062	9.99759
BjuVA02G05120	1	3.40787	6.84278	9.82105	8.67927	10.5748
BjuVA03G31410	1	1.15933	3.18383	7.29601	12.0986	18.6642
BjuVB05G30030	1	1.09396	10.7333	44.2849	53.3917	84.3708
BjuVB03G08340	1	9.60106	10.9889	84.2712	141.943	241.094
BjuVB03G06800	1	4.78953	3.30431	31.7008	57.238	95.2764
BjuVB02G06820	1	1.84745	0.99197	13.6015	11.2646	19.0611
BjuVB04G48810	1	8.3718	5.62058	31.2367	29.2607	46.4645
BjuVA07G40690	1	8.17855	14.2966	31.7107	59.6651	92.4631
BjuVB06G21070	1	0.401272	1.18452	15.0806	32.3056	53.6634
BjuVA03G19470	1	3.4976	4.12353	13.5839	15.8813	24.3167
BjuVA09G48870	1	3.50695	2.59261	11.6165	17.8068	28.5531
BjuVA03G17210	1	9.52225	7.16045	25.944	18.9893	28.1069
BjuVA03G61790	1	1.73746	0.974022	9.41608	4.93799	8.16904
BjuVB06G37360	1	2.71663	6.62633	10.3743	26.2194	39.2404
BjuVA06G34260	1	9.56832	5.46718	23.4957	26.0089	40.454
BjuVA02G06570	1	4.8662	3.27778	13.489	13.5635	21.1062
BjuVA02G28580	1	6.52639	5.88502	1.97013	9.37415	11.3441
BjuVB02G68190	1	1.46842	1.75933	4.63618	5.94924	9.07746
BjuVB02G03530	1	1.06149	0.238164	4.39237	4.92714	8.07106
BjuVA05G33640	1	143.301	64.559	299.623	215.947	320.944
BjuVB04G26620	1	3.37831	6.61192	7.98443	10.4597	13.689
BjuVA01G03620	1	11.8391	8.02788	25.6283	22.8568	33.1455
BjuVB06G55840	1	0.886209	1.4222	5.14508	11.1944	18.7679
BjuVB04G42830	1	10.4923	12.8319	19.7355	31.1648	44.0777
BjuVA02G24600	1	0.738193	0.58932	2.1205	7.75338	12.5324
BjuVB06G09160	1	0.345886	0.38915	0.933973	3.11846	4.92415
BjuVB07G19580	1	13.973	11.6241	21.0088	37.5334	55.5931
BjuVB01G46850	1	0.981664	1.36639	3.61103	6.2815	9.69495
BjuVA04G21830	1	3.50197	3.37712	2.63957	15.415	23.6678
BjuVB02G56010	1	1.58499	3.7811	4.11235	5.52623	7.12768
BjuVA03G15880	1	12.7664	14.2161	17.5909	26.2945	34.8707
BjuVA07G24960	1	3.74031	2.50691	8.16855	8.7904	13.6654
BjuVA03G05690	1	0.278875	0.418461	0.207148	2.16452	3.36214
BjuVB03G34700	1	9.60205	6.27787	14.6347	19.6018	29.6439
BjuVA02G05070	1	28.7897	41.1758	42.8295	58.4024	73.9997
BjuVB07G12150	1	0.0987663	0.0885115	0.127119	0.619133	1.02305
BjuVA10G25470	1	15.0014	21.1574	25.3742	34.3214	45.3381
BjuVA09G26600	1	0.809272	1.00653	2.00204	2.26179	3.23566
BjuVA09G38780	1	0.565896	0.670363	1.17975	1.77893	2.68764
BjuVA08G01230	1	6.71886	6.20297	11.3306	13.1285	18.3082
BjuVA03G00140	1	62.0157	53.8814	108.724	107.401	149.816
BjuVA02G33780	1	6.74269	4.81625	11.4673	11.9399	17.4282
BjuVA10G33510	1	4.06402	2.81568	5.5568	7.11818	10.2689
BjuVB03G40420	1	2.23382	1.35643	3.30563	4.52542	6.74428
BjuVA08G20800	1	13.566	15.2253	18.4394	24.5906	31.6212
BjuVA04G32830	1	0	0	0.115075	2.50244	3.6534
BjuVB03G49760	1	12.7641	11.4169	25.668	23.9449	33.7979
BjuVB06G03470	1	0.0632908	1.21279	1.43746	1.90329	2.6621
BjuVA06G04140	1	0.486641	0.259127	0.511481	2.0017	3.30696
BjuVA09G60800	1	1.62822	1.79174	4.73933	4.91184	7.51047
BjuVB08G19290	1	9.03212	39.1878	63.3454	101.194	158.091
BjuVA07G38500	1	0.961637	7.3874	99.0875	126.833	224.765
BjuVB07G06680	1	20.3632	7.84329	20.4565	20.6919	28.542
BjuVB04G08990	1	8.67721	1.76843	14.9016	33.582	57.0623
BjuVA05G12270	1	5.83788	1.93945	5.68496	6.11803	8.79199
BjuVA09G40990	1	8.83269	3.7816	7.90513	8.24646	10.8465
BjuVA01G40270	1	13.3991	5.49972	30.2672	31.7542	51.4131
BjuVB01G34920	1	31.8878	63.6007	110.014	116.298	167.495
BjuVA03G07170	1	6.79682	13.7969	7.39717	13.9453	15.0744
BjuVA09G38380	1	1.00886	2.76973	19.1532	33.3237	58.1872
BjuVA02G22910	1	0.48046	0.37446	26.4253	240.114	433.814
BjuVB02G50220	1	10.0873	4.49916	38.6609	55.1128	94.6994
BjuVA07G30260	1	2.32406	1.60861	10.2738	9.56635	15.916
BjuVA09G54610	1	0.275817	0.856223	3.15636	4.59682	7.81604
BjuVA03G57620	1	0.537077	1.15907	2.9329	3.90964	6.18672
BjuVB08G29880	1	1.47998	2.7904	4.79399	8.21081	12.8146
BjuV_Contig00581G00240	1	1.31863	1.47183	5.28383	4.87642	7.75887
BjuVB02G48080	1	0.167749	1.07973	1.50836	2.47686	3.74026
BjuVA02G47560	1	3.3217	1.54553	8.73165	9.10208	15.2289
BjuVA04G22780	1	2.59728	1.91017	6.60219	6.8537	10.8265
BjuVB03G03870	1	8.50926	6.52495	17.2215	13.8789	19.8809
BjuVB04G04680	1	0.904846	0.206351	3.56754	6.65851	11.7263
BjuVA02G24440	1	5.17868	9.51703	8.65073	16.0353	22.1089
BjuVA03G30310	1	4.75969	7.48023	7.429	16.0942	23.4493
BjuVA04G25680	1	54.4896	51.4964	89.4701	137.94	208.293
BjuVA07G21260	1	0.400546	1.1854	0.817571	2.89787	4.47963
BjuVB06G51960	1	1.31727	1.77507	3.15577	6.13358	9.90878
BjuVB04G31120	1	2.79184	1.9683	5.87412	5.97966	9.18631
BjuVA09G46100	1	0.111841	0.535182	0.642179	1.11719	1.68335
BjuVB01G12650	1	0.632593	0.222339	1.79951	1.88346	3.23193
BjuV_Contig00947G00040	1	7.07875	7.23088	9.21592	12.2157	16.3922
BjuVB03G09740	1	4.53392	4.42207	6.68094	8.08602	11.2327
BjuVB08G11190	1	0.138665	0.197315	0.746622	0.657055	1.07277
BjuVB08G02930	1	22.2801	11.3636	31.3438	31.7799	47.0106
BjuVB05G06480	1	93.0339	34.4434	166.888	160.09	258.453
BjuVB04G07740	1	1.0201	5.59412	7.43023	8.72648	12.5362
BjuVA08G29770	1	8.34894	9.66662	83.043	118.42	213.318
BjuVA02G04460	1	9.43621	5.65802	37.0484	34.2623	58.6879
BjuVA03G56390	1	1.39465	0.558349	10.639	8.91052	16.1337
BjuVA07G43420	1	1.86901	1.3836	5.7089	8.19481	14.0555
BjuVB07G22300	1	0.128093	0.584019	2.2138	0.682554	0.929829
BjuVB06G26570	1	2.41237	4.28007	6.50236	9.46125	14.3617
BjuVA09G10190	1	28.0805	38.4857	62.5769	77.1436	112.884
BjuVB06G09920	1	4.86602	5.2332	10.6148	8.85801	12.2128
BjuVA03G30790	1	26.0432	42.1936	43.7352	69.5811	96.4106
BjuVA05G39590	1	5.91138	4.45865	12.405	14.2544	22.6594
BjuVA06G05330	1	7.47033	6.47446	14.2186	17.4166	26.7664
BjuVA09G48750	1	3.80221	3.71105	7.79241	13.5306	22.2008
BjuVB08G39910	1	1.35378	1.17915	2.51678	3.33889	5.22105
BjuVA09G44170	1	1.68254	1.54142	2.44765	5.19755	8.39938
BjuVB05G25310	1	0.928683	0.183295	3.04942	3.37759	6.03767
BjuVA09G26870	1	5.53626	3.95306	7.80809	8.75929	12.6755
BjuVB08G56530	1	2.61021	2.8615	6.40857	5.1999	7.45801
BjuVA03G06510	1	3.93999	2.62198	6.63909	6.02552	8.83475
BjuVA07G44760	1	79.2701	21.1782	85.3605	72.6627	105.122
BjuVB05G22460	1	6.99373	2.69047	18.2148	16.5889	28.1358
BjuVB03G08450	1	9.45345	4.61607	13.8233	12.2828	18.097
BjuVA06G22620	1	68.9056	31.4531	96.7997	65.4827	88.0677
BjuVA08G30260	1	19.1299	8.59053	27.6421	23.887	35.2554
BjuVA06G02070	1	8.19453	3.16052	5.67489	12.0776	18.6122
BjuVB06G00960	1	5.96633	2.93439	6.10736	11.387	18.1381
BjuVB03G38890	1	25.1627	31.3463	108.999	79.6681	127.789
BjuVB03G38880	1	168.313	153.725	438.434	375.176	576.564
BjuVA05G01160	1	17.6982	34.1937	50.9532	35.2515	41.1457
BjuVA08G26340	1	6.15162	6.45124	15.352	16.5216	25.9779
BjuVB04G23240	1	4.40351	2.51608	10.9737	8.93898	14.3969
BjuVB05G24410	1	0.32205	0.974603	2.54861	4.31099	7.49135
BjuVB08G36270	1	4.0949	0.57808	17.5911	11.1809	20.3503
BjuVB05G11170	1	4.19821	2.47933	6.90378	8.74242	14.0193
BjuVA05G03980	1	27.39	23.5037	50.5069	60.3462	93.1177
BjuVA04G16080	1	2.00375	0.802407	6.1256	7.48053	13.322
BjuVB08G05410	1	4.49014	2.87239	7.55004	8.15928	12.613
BjuVB07G13590	1	12.2785	7.13833	19.7148	20.0089	30.7346
BjuVB04G33960	1	21.7304	10.9255	35.0765	32.8614	50.4723
BjuVA09G07220	1	29.8545	17.6571	54.1953	43.976	66.3019
BjuVA06G13760	1	145.06	46.0912	192.133	134.776	195.186
BjuVA10G20000	1	2.78794	1.36044	17.083	12.3213	22.5035
BjuVB05G51680	1	3.38437	1.79129	9.94258	10.1017	17.4752
BjuVB05G29460	2	6.11993	60.8522	15.7841	15.0067	87.3304
BjuVA09G42360	2	184.573	26.039	219.767	52.0904	240.25
BjuVB02G34800	2	194.374	57.0975	243.357	165.613	370.11
BjuVA02G46690	2	20.8282	6.01351	45.9704	41.9411	72.9582
BjuVB02G09790	2	0.580186	6.13344	6.6257	12.3298	49.4589
BjuVA08G30950	2	145.072	49.9231	177.312	89.4973	188.928
BjuVA02G00180	2	24.5427	7.37004	40.8968	38.1981	77.6799
BjuVA09G09350	2	1.83766	6.99534	6.51668	1.19955	19.1827
BjuVB01G01110	2	90.6049	35.5449	143.854	220.453	402.433
BjuVB03G23890	2	6.53431	15.7847	10.79	12.3165	38.2276
BjuVB06G27210	2	5.76784	20.2891	16.5153	35.3485	60.5008
BjuVB02G06330	2	18.4429	6.18904	21.9922	18.5227	33.7051
BjuVB01G29930	2	5.48184	1.09394	7.91477	8.12757	29.7823
BjuVB07G03140	2	15.4918	37.5721	38.2554	26.1141	40.9803
BjuVA08G13230	2	31.8532	10.8172	27.6855	14.8368	38.7163
BjuVB03G44140	2	21.221	7.77954	29.9652	37.1845	65.4787
BjuVB05G50040	2	154.723	75.8135	205.487	90.1221	346.43
BjuVB05G46000	2	38.0849	17.6774	32.3265	36.5902	50.0947
BjuVB06G57480	2	2.40302	0.613386	4.11795	5.16485	11.1766
BjuVB01G24580	2	13.7959	42.7304	165.374	219.449	477.312
BjuVA07G33620	2	77.7137	29.6606	123.117	139.239	233.132
BjuVA01G03430	2	2.79828	0.504014	1.99491	0.593501	2.67802
BjuVB05G17040	2	142.698	64.4803	200.455	86.2434	248.344
BjuVA09G07730	2	0.683975	0.0246329	0.563139	0.326731	1.67641
BjuVA06G35660	2	1.82131	0.347451	2.31395	1.78502	3.26207
BjuVA02G16770	2	1.89464	35.3552	8.39201	6.0065	57.0307
BjuVB06G29660	2	1.29649	5.58191	4.62678	4.02105	6.25397
BjuVA01G07360	2	16.4259	41.3087	83.9155	42.3197	244.163
BjuVA10G28180	2	10.5974	20.872	7.7605	9.62781	38.6373
BjuVA03G28650	2	305.614	150.193	564.708	332.961	751.402
BjuVB02G60400	2	2.87535	0.689449	3.41399	1.61104	6.95808
BjuVB04G52320	2	18.7166	8.00734	24.9315	26.1757	51.5771
BjuVA08G27150	2	6.10019	13.1325	12.6211	11.9714	23.9984
BjuVB04G33760	2	20.4283	9.31852	23.1951	22.6752	37.9918
BjuVB02G04120	2	40.4637	19.5073	89.0104	22.2478	82.2819
BjuVA07G37800	2	5.03351	2.2735	6.69712	6.06078	10.5229
BjuVA04G03570	2	0.667664	2.99467	4.59555	12.0595	23.0527
BjuVA02G10360	2	8.69455	3.43901	18.1849	8.75079	18.2099
BjuVA05G19070	2	6.91764	14.431	13.4148	24.0037	52.3782
BjuVB02G47460	2	2.32085	0.585502	4.30151	2.13645	7.70262
BjuVB01G05400	2	2.35614	5.81045	6.24551	8.13586	12.9738
BjuVA09G56490	2	1.84109	4.55833	2.34706	4.9729	13.8897
BjuVA08G34050	2	7.74229	3.78161	14.2319	10.0536	15.7177
BjuVA10G24100	2	1.37678	0.29959	0.889896	1.51372	6.01256
BjuVB04G36910	2	3.29586	1.1663	3.35445	2.52045	5.34683
BjuVA03G37320	2	4.96823	2.31202	9.36429	7.94102	13.5551
BjuVB04G05640	2	2.0208	0.834314	3.24941	2.25004	3.65104
BjuVB02G63760	2	1.00963	3.42733	6.66116	3.57552	8.17643
BjuVB05G55390	2	2.33319	11.1803	103.273	740.4	1671.26
BjuVB05G42720	2	2.03539	3.82439	39.2191	48.2954	118.492
BjuVA08G31330	2	1.36203	2.32223	11.0813	20.4295	66.3124
BjuVB04G38130	2	1.01598	1.65726	19.0932	20.9231	47.8249
BjuVA03G61780	2	1.7908	0.504833	19.7684	1.90744	22.1241
BjuVA08G17330	2	4.15042	2.06133	22.8567	7.97813	29.4992
BjuVA05G26510	2	2.03971	3.59765	10.4737	3.28734	16.3854
BjuVB05G00690	2	35.9729	57.0567	110.642	74.8967	131.376
BjuVA05G41590	2	7.04676	10.2839	29.2421	10.9418	18.15
BjuVA08G08110	2	26.1151	45.8263	88.2478	83.8336	130.254
BjuVA09G55930	2	0.108623	0.413014	6.14696	3.88344	10.9385
BjuVA03G59870	2	0.199566	0.801527	3.6955	5.14528	27.6608
BjuVB08G46250	2	3.87866	3.00474	16.4643	4.89805	31.7188
BjuVB02G56050	2	6.4059	4.20256	24.023	8.96966	38.5273
BjuVA05G41630	2	5.61189	5.89655	16.8624	19.0811	37.4973
BjuVB05G57620	2	140.475	86.3545	331.768	134.51	299.957
BjuVB06G55040	2	41.0272	59.9859	116.498	18.5041	102.092
BjuVA06G03110	2	0.651858	2.33547	3.37233	3.79349	18.7284
BjuVB08G58930	2	5.69809	3.9501	15.7604	6.19739	21.9164
BjuVB05G58600	2	5.61621	6.63935	15.3097	28.9907	69.4121
BjuVB02G63590	2	0.206808	0.529996	1.7479	1.42645	8.22115
BjuV_Contig00694G00340	2	27.7841	28.7389	61.0509	44.5766	98.7294
BjuVB05G29690	2	0.0479569	1.30822	3.98588	0.778206	1.859
BjuVA06G16850	2	20.3384	19.7	8.99969	19.1395	49.5988
BjuVB02G11170	2	0.507406	1.41474	2.49497	0.851642	2.98017
BjuVB07G28560	2	0.391227	1.30813	2.41347	1.34338	3.33888
BjuVB01G38140	2	0.697938	1.07752	2.88341	3.10032	5.17175
BjuVA09G47080	2	0.0284961	0.416578	1.7736	1.68823	6.35568
BjuVA07G40950	2	2.46124	2.09143	7.07298	6.84601	16.253
BjuVA06G16450	2	23.7804	23.0532	48.3897	35.1915	62.0327
BjuVA10G10370	2	9.99944	12.9004	20.0065	15.8008	20.5546
BjuVB06G12320	2	9.79338	7.30141	22.6472	8.08696	38.6759
BjuVB05G49930	2	8.10499	5.17398	16.1749	18.1321	30.7788
BjuVB08G37770	2	5.98882	10.8673	10.6408	19.3077	39.0053
BjuVA06G34570	2	14.3452	9.98534	13.6548	4.84969	15.7548
BjuVA06G06090	2	12.8669	12.0866	16.5937	4.19651	17.8004
BjuVA09G57900	2	24.2814	9.20263	14.3951	4.11807	37.6782
BjuVB01G34700	2	9.86255	11.6989	20.887	22.3545	36.1682
BjuVB01G05960	2	0.0843877	3.02429	0.321159	2.33665	6.11912
BjuVB04G15870	2	0.902685	1.37662	2.73102	4.49331	8.91718
BjuVA08G38390	2	6.67246	17.4621	18.8949	31.8217	204.815
BjuV_Contig00654_ERROPOS300000G00490	2	135.183	123.985	160.856	54.1908	196.427
BjuVA05G06270	2	34.7371	25.0745	52.6332	10.9788	75.8921
BjuVB03G03450	2	5.8876	9.37845	9.44068	19.0647	33.4349
BjuVA03G19640	2	13.302	17.2887	13.089	31.1674	51.7302
BjuVB03G15530	2	33.2876	48.8854	43.4847	75.786	162.08
BjuVA03G58330	2	0.119407	0.270723	0.657217	2.49321	4.61037
BjuVB05G06200	2	3.33805	5.07126	5.86724	9.44487	18.0793
BjuVB03G28070	2	4.84702	3.71697	8.70069	11.7769	23.3121
BjuVB03G34640	2	0	0	0.676698	2.26951	4.00203
BjuVA03G11660	2	3.13623	1.73709	1.71823	0.517803	4.18445
BjuVA03G31400	2	0.948155	0.682738	2.09208	2.72483	4.76132
BjuVB02G22940	2	4.63413	8.37211	11.8286	10.951	37.9835
BjuVA02G07050	2	0.130837	0.640504	0.400159	1.3564	2.95475
BjuVA08G20050	2	0.0230446	0	0.338705	1.21404	2.55405
BjuVB02G66610	2	1.2152	1.18168	1.27488	4.1281	8.89037
BjuVA06G39780	2	4.22944	3.58343	6.02046	8.54648	24.5901
BjuVB06G48390	2	4.01576	3.00065	8.493	10.5581	18.7327
BjuVA09G19780	2	0	0.263003	0.622982	6.40717	19.0475
BjuVA04G16140	2	3.78643	3.44896	3.44894	0.950437	6.26076
BjuVB04G35140	2	8.5349	11.1531	8.55783	17.2436	24.0594
BjuVB05G22120	2	1.12081	1.80569	1.67681	3.80208	9.29179
BjuVB08G15270	2	3.69933	2.21788	7.18785	9.14928	18.3459
BjuVA08G15160	2	0.631653	0.363307	0.958282	1.97839	3.75338
BjuVB05G06940	2	1.31467	2.15719	3.96479	3.4675	7.36409
BjuVA01G21970	2	0.353692	0.454116	2.02275	2.66663	5.56135
BjuVB01G06560	2	0.207706	0.986099	2.27271	1.8018	8.95959
BjuVB07G26440	2	1.85586	3.93174	2.36801	5.11289	8.12602
BjuVA09G66080	2	0.117404	0.0210278	0.925726	1.01083	2.18113
BjuVA08G02290	2	2.03766	2.67527	3.78057	5.09206	8.76666
BjuVB04G01060	2	0.242548	0.728448	0.456314	1.36783	6.42888
BjuVB02G10900	2	32.3244	24.7717	48.1797	45.7564	217.723
BjuVB04G18310	2	3.31747	2.60714	8.71773	6.32231	29.9493
BjuVB08G24940	2	1.57756	2.5735	2.5221	2.87344	23.0432
BjuVA01G31330	2	0.467579	1.3721	1.17435	0.822845	6.12976
BjuVA09G22230	2	1.90368	2.11312	3.84974	3.77975	11.3562
BjuVA07G42480	2	22.686	30.8576	51.0911	32.6924	100.02
BjuVA10G30020	2	0.508884	1.30216	0.819846	0.907337	5.24955
BjuVA03G59860	2	22.1742	21.3818	30.2564	38.3746	85.5259
BjuVA05G44290	2	2.40065	4.16573	5.18375	3.85246	11.7253
BjuVB08G54380	2	8.90522	12.9177	18.9066	36.6412	61.1803
BjuVB02G69240	2	18.6098	32.2108	29.7938	29.7457	67.1684
BjuVB01G45970	2	22.3667	14.7747	35.572	22.3795	79.2434
BjuV_Contig00475G00040	2	0.178204	0.174738	0.448395	0.0775938	3.97096
BjuVB04G17030	2	0.312264	0.61032	0.93187	1.01003	6.30827
BjuVA08G33350	2	0.893503	1.8851	2.18261	2.50408	8.60888
BjuVB02G54000	2	8.49306	4.2669	13.3317	17.3826	35.9314
BjuVA04G33430	2	4.0429	5.00165	7.52033	6.2112	15.903
BjuVA06G28860	2	31.7434	22.6094	72.3767	32.3281	115.721
BjuVB07G13550	2	3.22833	2.8012	5.33671	6.12978	19.8141
BjuVB04G48490	2	1.8132	2.12955	2.37717	3.13678	7.831
BjuVA07G17990	2	3.22853	4.48554	6.50203	5.50131	15.0524
BjuVA09G61660	2	269.936	153.704	465.229	476.316	835.708
BjuVA08G38050	2	1.0773	1.91366	2.98985	2.32989	5.64205
BjuVA03G29340	2	40.0175	20.2389	58.5591	58.7885	134.187
BjuVB06G34120	2	0.159312	0	0.354065	0.991047	2.49109
BjuVB05G45660	2	134.746	108.716	249.344	195.077	442.498
BjuVB07G30450	2	0.26808	0.232949	0.142358	0.416096	3.58272
BjuVA05G42450	2	2.87176	3.02668	4.63617	3.03617	12.3096
BjuVA03G22690	2	12.8873	6.18414	19.6125	13.7416	47.9288
BjuVB03G13030	2	6.00363	10.2988	10.1516	10.0481	25.5144
BjuVA02G37850	2	6.27207	5.73821	8.80881	9.53982	21.0686
BjuVB07G10470	2	4.77868	5.0207	8.43573	7.68944	20.9516
BjuVA04G04730	2	4.53183	2.45103	7.71708	7.67937	28.4243
BjuVB02G46640	2	7.57382	9.96732	10.2302	13.098	32.372
BjuVA09G62230	2	2.89964	3.36727	3.1734	5.28	11.797
BjuVA01G38290	2	17.5216	20.1018	37.0193	18.8532	50.6231
BjuVA02G18740	2	0.567325	0.594521	1.17211	0.901114	3.90605
BjuVA10G30040	2	1.16356	2.4586	1.13743	1.10741	7.70862
BjuVB03G52490	2	17.1112	17.9731	30.458	25.0208	51.4373
BjuVA05G38350	2	0.756135	0.356512	3.71274	3.12575	6.24822
BjuVB03G55300	2	9.32763	8.70193	14.4984	13.5068	32.1691
BjuVB06G04360	2	6.90731	13.7433	12.1122	4.94048	25.8808
BjuVB06G11050	2	6.4591	8.10031	9.63945	8.9889	21.2961
BjuVA01G12640	2	6.62773	6.58536	14.5941	8.99879	20.4785
BjuVB06G37060	2	2.25096	2.98235	3.63403	2.6767	9.24076
BjuVA03G02140	2	4.71273	6.86912	7.5076	7.14323	14.3004
BjuVB07G19290	2	6.08099	3.52594	13.5294	11.2191	19.4898
BjuVB06G18770	2	0.499722	2.16985	0.979793	1.1438	4.58759
BjuVB03G17590	2	0.298927	0.489586	0.292812	0.926829	2.65076
BjuVB02G46480	2	4.54543	4.82276	4.52268	7.17929	14.0305
BjuVA09G49640	2	28.6	34.5461	41.4184	35.1033	75.8687
BjuVA08G34380	2	4.08182	2.27503	9.28433	4.00703	13.5258
BjuVA03G37180	2	3.17426	2.90733	3.58307	2.88027	12.0929
BjuVB05G34560	2	0.0196755	0.107772	0.214273	0.566332	1.72284
BjuVB08G18230	2	5.45659	0.835857	9.52691	10.9403	26.824
BjuVB02G69610	2	1.20873	0.91521	1.80745	0.491584	7.12943
BjuVA03G24200	2	0.530163	0.285858	0.581552	0.94011	3.84088
BjuVA08G36480	2	0.166976	0.125618	0.37562	0.138318	2.43918
BjuV_Contig00580_ERROPOS930405+G00150	2	5.393	8.72147	11.1501	8.07223	17.542
BjuVA04G12150	2	1.05188	1.15898	1.67507	1.46129	6.77762
BjuVB07G21460	2	16.1092	18.4798	25.6929	17.6219	42.1958
BjuVA05G00150	2	16.4392	13.9291	24.8123	17.9325	49.5919
BjuVA10G20990	2	0.282358	0.0606517	1.12684	0.838722	4.04881
BjuVA03G14370	2	17.2421	12.2148	33.268	27.2626	47.3425
BjuVA08G32920	2	0.237035	0.955761	0.238594	0.856192	2.17525
BjuVB02G09490	2	1.25057	1.42879	2.03156	3.34393	5.81816
BjuVA02G21070	2	0.0330493	0.197294	0	0.284178	2.61112
BjuVB03G06440	2	2.52653	2.05194	4.08536	2.12828	12.3399
BjuVA09G22830	2	24.608	34.5885	35.1677	33.8263	62.4963
BjuVA07G27460	2	0.0563589	0.0725746	0.390928	0.319094	1.73998
BjuVB03G02750	2	6.2133	6.91994	9.68979	11.4052	21.504
BjuVB02G52080	2	3.28756	3.07148	5.64528	3.91473	9.92537
BjuVA09G29160	2	18.6625	9.99052	26.6253	26.0292	45.7236
BjuVA09G35920	2	6.15067	4.56109	7.31734	9.4533	18.3223
BjuVA01G01790	2	6.12548	6.84804	11.0471	7.83941	16.3982
BjuVA06G05580	2	6.86938	12.0291	10.1695	13.7688	19.7433
BjuVA09G49250	2	2.3978	2.71771	2.99478	2.06105	9.17644
BjuVB04G03390	2	0.778355	1.6259	1.9078	0.844087	7.48152
BjuVB02G56130	2	21.0958	16.9149	40.9358	29.766	54.5813
BjuVB08G05320	2	2.34978	3.66251	4.9732	3.97889	8.12889
BjuVB08G52290	2	10.4213	14.6565	7.26043	7.09514	36.7483
BjuVB03G27350	2	0.612857	1.17622	1.73799	1.1406	4.07579
BjuVB01G30330	2	7.12409	12.1743	14.2065	13.2784	20.4208
BjuVA08G20650	2	1.30755	0.207777	1.25097	3.192	6.78043
BjuVB07G04530	2	0.913877	2.23889	2.33341	1.90453	4.4848
BjuVB04G05380	2	0.500325	0.627752	1.13727	0.756095	2.53062
BjuV_Contig00907G00330	2	2.95768	2.99767	4.74253	5.38142	8.37539
BjuVB03G05600	2	1.29348	1.05496	2.4989	1.8688	5.93815
BjuVB04G07860	2	38.4987	22.6809	47.1846	49.3238	94.7373
BjuVA02G04240	2	11.1784	12.0065	20.1352	17.9391	27.3033
BjuVB02G74010	2	0.568197	0.904366	1.36237	2.30522	4.36096
BjuVA01G23720	2	2.06215	1.18871	3.86552	2.06982	6.38369
BjuVB06G39490	2	15.6373	9.95049	19.4634	18.428	43.2301
BjuVB08G20910	2	0.0977822	0.334194	0.272835	0.42033	1.05706
BjuVA03G34070	2	2.50071	1.09295	5.49012	2.83425	8.07526
BjuVA03G53780	2	0.368152	0.20123	0.651308	0.809988	1.68793
BjuVA06G04020	2	2.21928	2.60677	2.14906	1.95983	10.7542
BjuVB04G23640	2	1.01624	1.60636	2.27877	0.54403	4.57136
BjuVA03G24020	2	4.15805	7.66292	3.28871	6.94826	12.5882
BjuVB03G23620	2	6.69816	11.9672	7.8077	13.0207	18.633
BjuVA04G21510	2	9.91668	7.96869	14.6732	15.0678	23.9869
BjuVB05G49150	2	1.15338	1.90823	3.09854	3.39601	5.94437
BjuVB08G13280	2	1.67999	1.86013	3.46531	3.44718	5.14354
BjuV_Contig00518_ERROPOS3923562G00080	2	5.97476	8.84783	10.012	10.1602	15.3478
BjuVA09G57650	2	34.9572	33.2849	59.045	42.8818	93.9149
BjuVA02G38770	2	4.71634	4.7728	5.44155	8.70435	13.0518
BjuVB05G50130	2	0.151279	0.191096	0.521289	0.242455	0.86537
BjuVB02G68570	2	1.10815	2.30732	3.47707	3.68539	5.54704
BjuVB05G60300	2	1.16557	1.86057	2.29835	1.7823	4.32657
BjuVB03G08270	2	2.35267	1.9644	2.2733	3.34472	7.50558
BjuVB04G36440	2	0.548862	1.44962	0.621402	0.773335	3.66717
BjuVA05G01360	2	26.1385	16.286	41.8569	29.0601	60.1274
BjuVB04G03320	2	16.149	22.9866	22.4596	12.9509	50.3542
BjuVA03G24160	2	0.614007	0.222786	1.50393	0.76284	3.27443
BjuVA02G47850	2	3.10374	2.37347	5.33531	4.53902	8.26658
BjuVB03G06070	2	0.0133394	0.0667167	0.029682	0.114673	0.313756
BjuVA09G58630	2	8.9832	7.14231	14.3466	11.0135	21.3378
BjuVB02G31200	2	0.134282	0.260168	0.31737	0.213002	0.876203
BjuVA01G32900	2	0.170468	0.48085	0.545493	0.489438	1.44339
BjuVA06G30530	2	0.0376592	0.249099	0.0769276	0.2139	0.842233
BjuVB06G37430	2	0.105839	0.170563	0.171201	0.187169	1.07606
BjuVA05G04480	2	0.0748538	0.0799545	0.529566	0.55753	1.01913
BjuVA10G31020	2	0.605987	0.782679	1.58112	0.971401	2.42456
BjuVB02G33500	2	1.53517	1.46751	1.20579	1.87848	5.53969
BjuVB08G40170	2	5.56779	6.25142	7.73735	8.88286	12.6192
BjuVA06G38130	2	16.0192	12.261	24.9119	22.4502	37.4607
BjuVB07G47580	2	4.28195	5.2335	6.92135	6.4485	11.6616
BjuVA03G03800	2	1.00362	0.406047	3.10569	2.05015	3.9831
BjuVB01G31500	2	4.48796	4.67126	9.51444	8.06702	15.511
BjuVA07G40890	2	1.34036	2.89961	3.26988	2.08569	4.30089
BjuVB04G31040	2	3.1245	2.54713	4.25627	4.54347	7.77261
BjuVA02G43220	2	0.150642	0.516953	0.873839	0.341164	1.81714
BjuVB06G50360	2	2.15318	2.99152	2.6406	4.04661	6.0144
BjuVB04G29060	2	22.8423	19.7636	38.2212	31.1795	49.0484
BjuVB03G28090	2	31.886	26.3127	32.7854	30.2234	77.6641
BjuVA01G23390	2	6.38373	4.8516	9.53932	9.35895	16.2085
BjuVA06G17300	2	1.00308	1.06582	0.571617	1.3426	3.65191
BjuVB02G09030	2	12.4744	17.4576	14.9801	17.376	27.5797
BjuVB07G19490	2	1.11629	0.923308	1.87763	1.774	3.10461
BjuVB06G39710	2	5.74939	4.77701	6.97748	5.62598	13.3481
BjuVA06G20510	2	19.5932	17.5467	28.2006	18.7389	47.7876
BjuVA09G48590	2	4.58155	4.99551	5.99942	6.87687	11.1566
BjuVB05G16000	2	1.42992	0.872924	2.09226	1.48485	5.55701
BjuVA10G15470	2	0.391328	0.765959	0.856927	0.296151	1.842
BjuVB08G06020	2	5.61364	4.44822	6.03586	7.85804	13.5571
BjuVB08G13390	2	15.1928	24.9231	18.3667	20.0168	32.6492
BjuVA10G13990	2	7.04859	4.84417	11.9119	9.46924	17.7839
BjuVB05G06790	2	1.53937	1.66105	2.47736	2.34522	4.56145
BjuVA06G18590	2	7.37043	3.89018	8.97242	12.964	22.7469
BjuVB02G23550	2	21.864	27.0753	27.79	26.2856	49.1997
BjuVA07G44780	2	0.0232415	0.0423652	0.273499	0.233472	0.905364
BjuVA10G19760	2	0.172756	0.216482	0.274572	0.275361	0.822141
BjuV_Contig00477G00020	2	2.23313	2.41415	3.29987	2.28988	6.57475
BjuVB04G22300	2	6.10174	6.31572	6.20691	8.23873	14.2131
BjuVA01G10360	2	0.190477	0.42046	0.0999878	0.841132	1.36558
BjuVA10G21790	2	1.58419	1.48232	2.14008	1.58977	5.18771
BjuV_Contig00453G00080	2	0	0	0.257697	0.154125	1.89569
BjuVA09G22460	2	0.517689	1.26884	1.37571	1.20273	2.43285
BjuVA05G38840	2	1.14023	2.47424	2.50714	1.40879	3.30576
BjuVA03G06920	2	2.9792	5.68667	5.47514	2.58694	8.33353
BjuVB01G02240	2	0.13919	0.490215	0.421243	0.287909	1.23662
BjuVB08G35910	2	56.5765	11.9792	64.6582	82.1601	143.142
BjuVB02G40360	2	3.13594	23.7541	17.1827	7.35261	199.082
BjuVA09G05860	2	33.7419	6.14282	43.8125	38.5515	68.5549
BjuVB04G30020	2	175.595	47.1346	281.69	176.23	317.598
BjuVA10G19220	2	1.40604	8.9236	2.35431	2.21904	16.6338
BjuVA06G34200	2	6.13031	26.0808	28.4379	29.0529	44.9041
BjuVB08G05030	2	65.5233	22.0898	115.746	63.7084	145.324
BjuVB07G04830	2	8.41801	0.47442	14.3077	6.78773	26.0412
BjuVB06G10110	2	3.29748	15.7709	15.7981	37.0242	75.3023
BjuVB06G32410	2	43.2657	11.4541	108.326	108.526	296.129
BjuVA03G65090	2	5.10427	22.0729	19.9739	20.3474	27.3507
BjuVA03G39630	2	25.3701	8.76703	36.1313	21.6714	48.9096
BjuVA03G02190	2	0.16452	5.28344	9.48627	18.1947	65.3735
BjuVA07G18500	2	16.2734	5.03338	22.8944	12.0315	24.46
BjuVB05G42790	2	24.997	8.25908	52.328	27.9959	67.571
BjuVA09G58040	2	4.45457	0.455069	4.42934	4.63845	8.31118
BjuVB08G01170	2	0.894376	7.58421	11.5113	24.2084	72.8587
BjuVA02G21850	2	14.0796	50.8923	158.284	177.044	312.488
BjuVB06G55210	2	104.585	38.245	199.014	128.999	453.897
BjuVA03G42600	2	6.00168	17.9134	14.8962	15.1854	84.307
BjuVB07G03840	2	50.9521	18.9224	71.3267	59.3428	97.0313
BjuVB03G46730	2	3.91002	14.6405	11.8107	9.81618	34.0193
BjuVB08G22200	2	92.5449	30.3932	142.624	99.9686	250.22
BjuVA02G45610	2	24.8361	8.92895	49.8334	28.5148	69.9319
BjuV_Contig00578G00040	2	15.9613	4.02428	23.132	31.0301	54.1949
BjuVA04G05930	2	17.6182	5.08396	25.1446	32.9696	63.8702
BjuVB04G31360	2	8.385	27.8634	51.5918	72.176	133.497
BjuVA09G40240	2	6.74499	1.54282	4.50987	2.52166	8.12351
BjuVB06G56530	2	0.132457	2.25636	1.78801	6.69108	18.7183
BjuVB02G74090	2	7.44829	1.70678	10.2603	7.28137	20.6528
BjuVA07G07370	2	0.211555	2.38321	1.54326	2.6287	4.12629
BjuVA01G40420	2	5.34474	1.38377	8.93793	9.20612	18.5485
BjuVB08G28370	2	85.5682	29.2493	129.947	102.549	207.585
BjuVA03G60110	2	26.6428	9.66308	30.1634	28.8365	44.1639
BjuVB01G39740	2	13.4216	5.15205	19.5022	12.7166	34.0549
BjuVA02G03240	2	0.821891	6.89675	2.06487	9.3658	26.5321
BjuVA09G02350	2	5.36187	18.4881	12.979	16.3613	56.2356
BjuVB02G59140	2	4.58422	0.453995	3.97389	4.1743	7.0515
BjuVB05G21160	2	13.59	4.74125	19.2784	14.0009	20.9555
BjuVA10G05470	2	1.61945	6.34162	2.33132	3.60751	18.9197
BjuVB08G54020	2	5.68754	14.3104	22.397	22.5412	36.8369
BjuVA03G37450	2	4.22257	9.36665	5.84629	6.38383	11.6521
BjuVB08G01210	2	6.20394	14.7776	15.1838	11.7364	36.384
BjuVA04G23330	2	0.863223	4.49244	1.47776	7.00289	32.8272
BjuVA03G32700	2	471.039	230.644	601.933	310.198	777.09
BjuVB02G41640	2	44.0402	17.9642	67.593	29.9549	69.699
BjuVA06G12610	2	40.2502	17.1937	67.8639	86.4052	147.701
BjuVB02G02590	2	303.224	131.416	416.183	189.563	504.74
BjuVA02G21690	2	3.54394	0.602256	7.00211	4.14806	9.40724
BjuVB03G19210	2	11.4826	25.4688	24.8596	17.254	29.9152
BjuVA07G36520	2	53.9101	24.5947	40.222	28.4446	110.07
BjuVB08G26370	2	9.66504	2.63337	34.3891	26.1553	100.504
BjuVA03G25090	2	0.722553	3.30564	1.4597	1.3884	25.4476
BjuVB07G20290	2	4.42973	12.5969	7.34258	13.8215	26.4155
BjuVB02G35500	2	39.6799	19.1145	81.5455	50.3347	83.6638
BjuVB08G12610	2	62.4849	29.5334	64.2711	16.3856	101.027
BjuVA06G30640	2	25.8436	11.0401	28.0346	20.6902	34.6813
BjuVB03G43250	2	49.9749	113.194	292.131	324.17	642.569
BjuVB06G36150	2	6.96629	2.27345	12.7312	12.8099	24.2473
BjuVA09G60360	2	2.63928	10.3194	19.3998	12.366	26.6653
BjuVA04G34350	2	10.12	26.4293	35.2113	23.3159	43.0852
BjuVB08G47310	2	4.62133	1.07711	12.4688	9.40791	19.9597
BjuVB07G24400	2	3.42569	0.718577	2.74901	2.33151	5.75984
BjuVA02G46890	2	4.65877	10.3858	7.36372	5.62893	16.5056
BjuVA06G41670	2	0.39844	25.0505	9.72026	11.5228	83.8436
BjuVB04G17610	2	7.1409	2.42773	25.694	20.6356	48.1447
BjuVA09G21200	2	16.3062	4.84172	23.8762	23.384	47.977
BjuVB03G02840	2	31.5202	12.165	26.0959	23.452	49.3314
BjuVA09G68970	2	40.4251	18.9836	41.557	19.1831	42.2173
BjuVA09G47310	2	1.94596	7.03675	3.725	7.28757	14.0405
BjuVA01G40560	2	6.3154	2.1145	8.19134	5.74268	8.87099
BjuVA09G41160	2	12.5732	30.7569	30.8615	18.0009	37.0816
BjuVA02G27140	2	23.7069	8.8347	21.4235	27.962	58.2599
BjuVA08G14430	2	223.142	99.3985	295.897	224.831	438.759
BjuVA05G20650	2	6.38877	15.1793	24.0545	8.60489	23.4409
BjuVA10G21780	2	4.35503	10.8477	9.73436	8.39089	15.8641
BjuVB05G02560	2	10.708	3.17712	9.80447	7.97936	13.6692
BjuVA08G25420	2	21.8102	10.7195	31.0375	31.2006	58.7743
BjuVA08G23390	2	5.26478	11.2421	12.0925	5.27108	14.4162
BjuVB04G53670	2	0.167761	1.8336	1.70242	4.49176	26.164
BjuVB04G47150	2	0.354308	3.09889	1.75162	9.17483	18.711
BjuVA03G56300	2	21.6113	43.9274	37.8484	31.2283	76.5802
BjuVA02G44770	2	12.0604	5.04106	29.6283	20.5006	39.1922
BjuVB06G14400	2	2.52255	0.130641	5.16638	4.78625	9.63894
BjuVA08G12050	2	5.05424	14.0583	11.8078	10.0394	34.091
BjuVA08G29140	2	13.9771	30.4137	29.7438	25.0955	37.749
BjuVA07G21480	2	38.4573	17.5742	31.9593	26.1689	45.2289
BjuV_Contig00909G00060	2	38.3211	17.9692	38.7574	31.4016	92.3107
BjuVB08G30900	2	41.2185	19.6214	72.4261	82.9376	140.526
BjuVB02G40080	2	8.3827	17.6091	9.51937	8.21588	42.4629
BjuVA09G07070	2	25.3517	10.0801	84.7404	42.8262	105.246
BjuVB03G17480	2	7.73962	17.123	18.4384	15.6716	43.2819
BjuVB03G23800	2	14.1556	6.6505	19.9676	12.5234	19.5263
BjuVA04G30120	2	8.68827	3.37401	13.9228	10.1669	15.6905
BjuVB08G27310	2	4.80353	1.94602	7.6572	6.47232	10.2802
BjuV_Contig00580_ERROPOS930405+G00230	2	148.666	60.7082	130.529	72.6027	216.482
BjuVA06G00700	2	39.4783	17.4963	101.722	106.959	191.443
BjuVA10G00660	2	29.9567	11.9078	28.9246	35.2682	85.82
BjuVB01G31840	2	1.50655	4.13396	8.67966	2.91817	20.3618
BjuVB01G33750	2	11.5615	3.77812	61.4322	2.03889	46.5818
BjuVB03G49800	2	151.898	66.1125	262.457	186.8	298.983
BjuVA03G29550	2	11.4202	26.3693	59.1513	20.4384	40.1471
BjuVB04G35810	2	77.4768	29.0079	215.347	131.307	352.387
BjuVB03G21990	2	201.003	94.2447	302.85	209.251	527.008
BjuVA06G34060	2	6.80539	2.77664	6.76872	5.39507	12.6371
BjuVB08G50230	2	5.44111	2.53129	7.54718	5.66679	8.22904
BjuVB07G17700	2	6.88482	14.5814	17.3204	13.4515	17.9917
BjuVB06G04150	2	6.91857	14.0419	19.6598	20.2087	46.5521
BjuVB03G59170	2	19.9682	42.8956	52.9904	37.268	59.8255
BjuVB06G17930	2	7.68145	15.2122	13.9512	11.6091	28.046
BjuVB01G22230	2	11.761	5.03414	20.9309	8.59259	22.3559
BjuVB06G01190	2	4.19453	8.71477	5.70636	4.38206	26.8455
BjuVA09G60550	2	4.62271	12.3851	10.3283	4.11688	27.2892
BjuVA08G35430	2	85.2341	35.022	92.6673	52.5154	196.633
BjuVB06G26110	2	32.7331	15.7721	40.6703	57.3827	132.248
BjuVB05G57850	2	143.392	68.5078	129.336	135.182	277.059
BjuVA09G36820	2	15.1358	32.058	59.7388	67.1	123.285
BjuVB08G01090	2	2.73023	6.72432	5.81882	8.48836	15.172
BjuVB07G06810	2	1.60849	0.326833	2.98208	3.19909	10.7163
BjuVB02G73250	2	14.8383	6.27319	17.8644	12.1087	17.9527
BjuVA09G18830	2	2.95215	7.71588	6.3924	6.11702	8.93686
BjuVB06G57560	2	3.68229	1.10027	6.62354	3.65419	9.85605
BjuVA05G35870	2	5.14947	12.1966	7.86381	9.67256	23.05
BjuVB03G33600	2	30.4159	13.7261	49.6517	43.08	118.494
BjuVA04G23920	2	2.0365	4.78323	5.03137	1.87875	6.59588
BjuVB01G00700	2	19.958	44.063	64.892	46.5224	69.7827
BjuVB03G08670	2	1.70793	0.472603	2.13661	3.84205	10.2212
BjuVA06G38280	2	4.67719	10.4751	11.4761	24.025	60.1431
BjuVB02G72950	2	5.62156	1.50733	56.2213	8.084	62.9814
BjuVB04G28400	2	2.27993	0.388033	4.14746	3.52931	11.3493
BjuVB08G17050	2	59.3137	27.4856	43.7395	55.4826	93.4736
BjuVB05G35210	2	9.87264	4.43089	17.1462	11.5705	26.6893
BjuVA10G29940	2	0.279058	2.09877	0.950664	0.504332	5.28499
BjuVA09G05900	2	3.18457	6.65151	5.19229	11.0077	17.8337
BjuVB02G50890	2	21.232	8.35659	22.2114	10.136	39.1362
BjuVB07G42240	2	11.4075	23.5596	38.0322	25.4567	36.5417
BjuVA10G06210	2	32.1752	15.1159	43.123	45.4867	118.231
BjuVB01G37420	2	0.951632	3.42281	3.59549	1.60782	4.41052
BjuVB02G71840	2	13.2176	5.59635	34.4143	35.5867	66.6434
BjuVA06G35000	2	3.94817	8.36119	6.6959	15.0927	24.5505
BjuVA01G26500	2	9.24554	4.36856	12.6722	9.00219	15.0435
BjuVB04G14350	2	10.5988	4.99089	6.59786	4.49591	13.0668
BjuVA08G29640	2	6.4601	3.0914	9.15299	7.71604	15.3111
BjuVA05G05030	2	2.84483	5.90224	7.23648	3.49893	8.69654
BjuVB04G15700	2	15.2297	6.47966	23.1682	26.721	44.985
BjuVA01G20190	2	3.93817	0.639261	4.13532	0.811788	10.7728
BjuVA09G24950	2	2.18966	5.59366	4.14783	2.96848	9.46909
BjuVA08G28920	2	1.99468	0.322801	2.4291	1.79164	3.56903
BjuVA09G56350	2	13.0321	6.27451	16.6858	12.955	19.9892
BjuVA10G32090	2	2.90855	6.11017	5.54355	5.15862	6.83624
BjuVA03G12880	2	9.29956	4.41057	27.6862	21.4047	39.1715
BjuVB04G19360	2	8.54777	3.19508	13.6647	6.06389	19.6584
BjuVA01G12000	2	1.25692	0.272246	1.08306	1.2092	12.1171
BjuVB06G13000	2	10.5946	4.69992	17.9266	17.3363	35.8353
BjuVA05G30070	2	1.8637	0.649418	2.33657	1.4579	3.02199
BjuVA03G59310	2	5.04601	1.99709	3.17291	4.79715	8.01298
BjuVA07G40060	2	2.53095	6.88795	8.52809	15.6381	29.8089
BjuVB04G07970	2	5.71225	1.1523	10.324	4.72872	11.8851
BjuVB06G06050	2	18.5534	8.75635	18.5056	11.5811	18.9558
BjuVA03G37780	2	1.58613	3.87528	1.61496	1.86421	5.35685
BjuVB05G06360	2	8.98728	3.78389	13.5374	8.95278	14.4603
BjuVA10G25550	2	0.25183	1.29466	0.570116	1.08028	1.81424
BjuVA01G13310	2	2.82324	6.63166	9.4084	15.796	31.7003
BjuVB04G13120	2	2.49123	35.5501	38.8997	116.094	318.492
BjuVB02G52840	2	0.393377	12.2459	7.6045	23.2893	77.9926
BjuVB03G56050	2	3.12031	0.304381	4.27697	1.97324	4.048
BjuVB03G19360	2	1.34387	0.33429	5.91817	1.1089	5.29142
BjuVB08G05430	2	4.78727	9.82331	9.73267	7.94483	16.7603
BjuVA02G32670	2	5.00303	25.8874	38.7879	117.255	228.445
BjuVB03G11940	2	4.09632	8.98793	5.74108	6.39345	16.9717
BjuVA06G10630	2	0.567822	2.88832	1.0291	1.09468	4.11483
BjuVB05G24030	2	2.95934	6.11002	8.0463	9.39019	13.9352
BjuVB02G50900	2	2.73169	0.902286	4.10973	2.90332	6.29246
BjuVA07G37360	2	19.4035	9.47758	31.9444	33.9183	60.7039
BjuVA01G14980	2	1.73606	0.544744	1.69311	2.17603	3.87696
BjuVA06G20640	2	9.71351	4.42477	19.1048	2.72908	23.475
BjuVA05G25120	2	1.50731	4.08809	2.05061	9.66559	19.7381
BjuVB02G29940	2	9.73385	2.52063	8.54965	9.49003	36.2863
BjuVA06G29630	2	8.83118	4.1224	12.9571	13.6174	30.0253
BjuVA07G29480	2	3.83099	1.63689	3.56063	3.89519	5.62993
BjuVB07G36290	2	0.635774	11.3998	12.8359	11.5277	31.5067
BjuVB03G13100	2	7.99817	3.05521	12.8234	16.3859	28.7371
BjuVA01G34700	2	7.13457	3.39998	4.33462	11.2159	18.8485
BjuVB03G09200	2	2.90659	1.23669	3.42449	2.87413	5.90548
BjuVB03G43950	2	2.79248	0.881225	5.14694	0.760432	5.2328
BjuVA09G42640	2	2.83663	0.960857	4.73701	12.3602	28.4426
BjuVA06G37770	2	0.211283	1.43411	4.85763	1.28903	2.59847
BjuVB08G29100	2	22.1843	49.7263	34.5306	46.9125	57.4119
BjuVB03G23250	2	4.83985	2.29161	9.53415	7.20963	22.3194
BjuVB08G08840	2	0.416704	2.35146	3.64683	0.48843	3.36174
BjuVB02G29930	2	5.59321	1.45124	6.63075	6.24297	18.7493
BjuVA01G18870	2	0.176516	0.544841	0.795417	0.260123	0.838408
BjuVA07G31240	2	4.09482	8.37807	9.07504	6.05668	10.168
BjuVB05G29840	2	4.02334	8.67891	9.45836	5.92638	14.1851
BjuVB04G48520	2	3.50713	0.566099	5.1412	1.2477	5.80734
BjuVB05G55370	2	2.50144	10.6343	296.953	1385.98	3095.73
BjuVB04G46690	2	36.2841	62.1181	1636.56	975.232	2431.98
BjuVB05G22390	2	55.801	103.399	511.778	479.522	1228.5
BjuVA06G15420	2	11.8408	18.0078	83.0366	80.4518	167.044
BjuVB06G41250	2	0.10397	0.998118	32.7788	58.0375	126.294
BjuVA09G57940	2	20.3616	22.6633	114.075	139.824	316.122
BjuVB04G12840	2	19.964	57.36	154.369	270.455	544.757
BjuVA06G01630	2	0.0726013	1.73445	14.0027	40.4767	78.5121
BjuVB02G41850	2	0.841185	8.01684	14.4441	43.2961	113.295
BjuVB04G31440	2	30.7036	58.4716	133.735	78.6918	127.057
BjuVA07G33280	2	12.4614	15.2298	65.1456	37.391	68.7327
BjuVA02G26040	2	2.16928	4.25742	14.4303	15.3649	41.5939
BjuVA08G10630	2	40.9977	79.0546	153.751	63.711	94.6043
BjuVB04G46670	2	1.71516	3.57377	117.153	96.7307	356.985
BjuVB07G16740	2	5.90176	3.69184	25.7202	9.59719	22.3301
BjuVB08G51460	2	6.11417	5.40101	29.988	2.87791	23.8601
BjuVB05G07110	2	159.374	166.754	516.996	363.735	858.328
BjuVB04G13110	2	2.24123	3.21528	16.0833	33.9526	121.726
BjuVB04G10620	2	4.46885	2.37528	20.5348	17.0082	31.1266
BjuVA06G05370	2	5.58766	5.62191	21.7224	18.5243	33.996
BjuVB02G62670	2	62.0476	87.5139	183.901	135.465	206.143
BjuVB05G59030	2	6.16601	2.80034	24.2782	13.4318	29.4116
BjuVB04G03300	2	12.1147	6.17777	43.8227	21.337	48.998
BjuVA09G24620	2	3.00341	2.93319	19.7538	30.9612	96.9172
BjuVA03G44220	2	11.7384	21.455	61.2995	76.6177	222.263
BjuVB06G03190	2	30.7461	54.2234	95.5639	60.3973	99.1241
BjuVB01G19680	2	1.60857	0.731173	9.62466	4.00552	8.73111
BjuVB07G37830	2	69.4434	125.059	220.119	121.174	172.769
BjuVA10G05480	2	12.3348	14.7743	70.964	22.8921	75.7193
BjuVB06G20460	2	1.29528	1.42788	9.38009	11.7797	31.7409
BjuVA04G23670	2	88.6449	136.78	240.676	97.5199	207.65
BjuVB08G52550	2	57.107	63.764	152.099	56.3442	112.591
BjuVA08G10610	2	4.92523	9.36534	19.2997	8.2199	13.6825
BjuVB04G32180	2	69.2838	76.9894	206.436	304.247	534.852
BjuVB06G41440	2	0	0	6.32048	7.92339	44.4685
BjuVB08G21050	2	0.525772	0.721174	4.8315	9.33439	32.3153
BjuVA06G09980	2	0.392312	0.257559	3.8915	3.05668	9.37263
BjuVA01G04440	2	3.12643	1.38906	14.7065	3.98137	21.1832
BjuVA05G23270	2	34.6588	67.0636	110.256	211.216	403.545
BjuVB06G41060	2	0.879599	1.67007	6.00944	16.8508	31.77
BjuVB08G21460	2	6.2713	2.71745	26.6427	5.14925	19.5839
BjuVB02G40370	2	1.1801	1.68244	8.38133	3.47328	43.6377
BjuVA07G27800	2	206.22	143.632	509.244	257.999	377.063
BjuVA07G27700	2	0.501171	0.725105	4.01578	7.70092	18.8694
BjuVA01G08590	2	1.82149	2.25061	7.67407	4.30051	9.7913
BjuVB06G57090	2	8.39404	10.8496	25.2842	14.5062	47.9399
BjuVA08G17320	2	5.59138	2.93506	22.1023	15.9875	41.2036
BjuVA05G03730	2	6.64934	12.6589	26.4977	23.2327	38.8423
BjuVA02G29850	2	11.2814	10.1686	34.126	33.1332	57.8131
BjuVB02G60480	2	12.366	20.0667	50.2581	28.4202	63.333
BjuVB03G25690	2	0.688812	0.473899	4.52515	6.13245	16.4068
BjuVB05G07180	2	49.1908	91.9249	142.35	122.4	261.036
BjuVA07G01890	2	6.35845	2.59599	22.1872	14.7072	41.9657
BjuVB07G10440	2	14.023	15.7939	41.5823	33.0667	51.054
BjuVA02G42850	2	2.5583	2.21638	10.4656	2.54282	11.3878
BjuVA09G50590	2	65.9711	61.9207	164.646	86.4349	133.575
BjuVA09G60220	2	0.762931	0.553551	5.3232	7.22942	19.6837
BjuVA05G03460	2	16.6295	28.194	48.2147	22.0912	52.6913
BjuVA06G47350	2	13.1282	5.38553	46.8019	19.8433	73.6978
BjuVA02G01190	2	0.0460554	0.35349	9.37817	7.47963	20.7264
BjuVB02G72960	2	3.47044	1.67694	14.9034	7.23145	15.0412
BjuVB03G03390	2	7.32521	5.93719	20.4377	14.7577	35.0301
BjuVB01G11760	2	131.215	157.981	300.745	217.561	345.703
BjuVB07G01230	2	6.39429	6.11933	18.979	16.5962	36.0692
BjuVA01G19940	2	0.0750471	0.163886	1.60619	4.03518	8.73231
BjuVB04G47460	2	68.6602	74.833	176.364	150.933	233.852
BjuVA06G07620	2	3.11924	2.76386	11.5019	13.7693	35.83
BjuVB02G47090	2	5.87888	3.39136	23.5802	9.3009	44.422
BjuVA05G29690	2	36.6018	63.7402	93.0045	54.736	96.0177
BjuVA04G18010	2	0.153196	0.185665	2.01664	2.11074	5.75031
BjuVA09G64460	2	39.2481	18.738	103.678	15.7596	90.9927
BjuVB07G19010	2	17.031	8.50811	51.8863	21.8428	46.1316
BjuVA05G28120	2	8.85255	4.94765	32.3785	1.08884	27.26
BjuVB06G37040	2	22.0837	20.5597	75.5076	23.6813	86.2227
BjuVB04G35600	2	11.6714	22.4568	29.3812	19.0255	34.7827
BjuV_Contig00855G00010	2	19.2111	36.9596	52.2404	32.6131	53.5668
BjuVB06G42730	2	359.819	356.08	771.203	458.487	635.342
BjuVA03G46470	2	11.0955	6.9877	29.5494	14.7198	40.5
BjuVB05G09420	2	0.380461	0.859072	2.35938	3.16596	6.907
BjuVA02G25620	2	17.7221	13.7409	42.986	43.7098	91.0931
BjuVA06G17330	2	21.6378	29.4741	51.173	21.5927	33.4742
BjuVB04G14660	2	1.35695	2.20244	6.59312	9.38228	17.4044
BjuVA03G38580	2	2.78441	5.07014	10.1429	5.53017	8.91115
BjuVA05G07300	2	10.0814	10.7909	25.2951	20.477	33.5568
BjuVB03G37990	2	0.0308049	0.193054	0.887818	0.650757	1.21416
BjuVA09G36790	2	18.2713	21.3484	66.9686	56.8526	117.18
BjuVB07G26390	2	0.347148	0.604061	4.28521	1.2297	3.81485
BjuVA06G36670	2	8.70195	14.078	21.6381	30.8956	57.665
BjuVA06G05880	2	3.84467	1.71729	12.6377	15.1643	45.2965
BjuVA03G30000	2	54.9855	76.7534	118.645	82.6452	133.874
BjuVA07G33270	2	0.573519	1.40471	3.04793	2.14972	6.22329
BjuVB05G07980	2	4.08004	4.58975	12.7772	8.78309	15.5863
BjuVA02G49070	2	4.7463	5.4324	15.7806	13.9293	47.0989
BjuVA09G57890	2	690.889	354.294	1570.86	1006.29	1606.69
BjuVB01G01950	2	9.18412	6.36503	22.8079	23.6471	39.6044
BjuVA03G05800	2	5.17941	5.67304	16.1657	7.73215	24.0142
BjuVA07G31500	2	2.71677	1.35611	9.52517	8.1055	15.9025
BjuVA07G00230	2	40.308	66.4065	94.004	79.9231	130.856
BjuVB02G13410	2	15.3416	11.6647	37.9818	54.5839	149.282
BjuVA09G00700	2	4.27463	8.09037	11.4757	4.69348	9.0255
BjuVB02G62220	2	13.1147	8.26505	33.2439	19.6556	41.6617
BjuVB06G11810	2	26.4819	24.7878	70.484	75.2387	142.883
BjuVA08G19110	2	0.718243	1.08724	3.08691	0.356914	2.55969
BjuVA03G29770	2	4.04453	7.87853	10.8489	11.8456	29.7707
BjuVA05G34520	2	10.5927	18.0028	26.4848	11.1255	26.3492
BjuVB05G55380	2	0.0674489	0.289327	5.59931	6.7677	20.7558
BjuVB03G14750	2	62.5387	36.9595	166.73	185.508	335.986
BjuVB01G02850	2	9.09893	9.29463	20.2908	35.3479	60.4241
BjuVA09G02070	2	18.074	21.0798	45.5003	22.3283	40.6323
BjuVB06G06710	2	2.87747	2.68326	7.65963	10.372	28.7465
BjuVA05G18600	2	1.15186	2.10869	4.23194	1.98646	4.0858
BjuVB01G21430	2	3.04927	2.95549	9.4252	2.81966	42.2041
BjuVA02G39250	2	1.50793	0.683811	6.64617	7.8737	17.4242
BjuVA01G26940	2	4.61726	3.91261	13.5744	6.19817	27.9774
BjuVB04G35800	2	1.89005	0.867755	4.66725	2.58755	5.36809
BjuV_Contig00654_ERROPOS300000G00280	2	6.35134	9.8699	29.9798	7.27474	22.1427
BjuVB03G16720	2	2.4007	2.80106	6.81081	6.60412	13.777
BjuVB04G05850	2	9.47465	6.38846	26.416	9.55981	33.3462
BjuVA09G20070	2	6.7469	3.12852	22.889	1.41503	21.5221
BjuVB02G60270	2	1.61539	3.94046	6.86345	1.98665	4.5582
BjuVB07G08510	2	3.81577	7.3565	10.9148	4.17729	11.2777
BjuVA08G25630	2	2.43797	5.2	7.41227	3.98505	6.66187
BjuVB03G54250	2	19.0247	33.9309	41.6914	42.4179	108.507
BjuVB06G34560	2	9.21703	11.1619	20.3069	14.2555	25.5443
BjuVB06G04690	2	4.53128	6.85281	10.266	5.0933	13.3946
BjuVB02G61570	2	1.66708	3.68913	6.28629	9.17472	24.8398
BjuVA06G01340	2	0.189699	0.810104	1.64518	27.3908	58.5948
BjuVA06G12430	2	12.4731	10.9269	29.5024	31.5975	79.4713
BjuVB08G48940	2	0.732562	1.9844	6.78097	0.420777	4.33283
BjuVA01G01170	2	12.8006	17.6516	26.3493	9.78248	38.7748
BjuVB04G51770	2	2.81415	2.45296	9.80272	7.14828	43.9749
BjuVB03G03900	2	29.7515	16.6399	58.946	32.4117	59.776
BjuVA08G34350	2	19.6973	11.9086	39.0331	18.4284	38.6372
BjuVB08G04440	2	4.89275	7.10488	11.1937	18.0321	28.6324
BjuVB03G43520	2	0.79688	0.564197	4.67881	1.34372	2.86125
BjuVA07G04520	2	7.6161	12.0639	16.8585	17.2007	37.8755
BjuVA09G48970	2	3.4594	4.04663	8.59493	9.44575	15.7712
BjuVB01G23520	2	3.07195	4.2385	9.77581	4.86381	10.0481
BjuVB02G56190	2	32.2475	41.8023	65.4628	61.6131	90.9534
BjuVA07G28520	2	0.282652	0.991243	2.10794	2.49345	4.23254
BjuVA06G31950	2	3.0052	2.85554	8.16182	8.74728	48.2348
BjuVB08G45480	2	9.85532	5.63851	24.4738	23.8742	51.1497
BjuVA05G31350	2	8.85359	5.86959	19.7186	17.3853	31.6942
BjuVA07G25920	2	2.23902	2.68019	5.30393	1.94446	3.77473
BjuVA01G32140	2	0.880346	1.69883	3.11591	0.82909	2.28818
BjuVA06G28410	2	9.05529	11.5002	21.9001	36.3886	93.2476
BjuVB06G47030	2	0.453381	1.30837	2.0267	1.17942	1.64357
BjuVB01G48840	2	2.83524	5.42563	6.63037	2.72215	6.89997
BjuVA08G31390	2	6.94213	7.15251	14.3965	13.4668	24.6788
BjuVB06G55050	2	0.771753	0.60287	3.41153	0.344353	2.16361
BjuVA02G19530	2	1.12977	0.512263	3.54847	3.07377	6.17582
BjuVA08G25620	2	1.86388	3.4338	7.23164	5.8442	10.2699
BjuVA03G55200	2	4.15198	7.41097	9.29334	4.1329	8.33823
BjuV_Contig01011G00070	2	5.27032	7.98475	11.0442	4.66787	12.5264
BjuVB08G13680	2	8.50088	8.45245	23.0339	15.9696	33.9991
BjuVB02G34290	2	0.283937	0.906539	1.50367	0.370192	1.04246
BjuVA09G11940	2	0.222897	0.701089	1.53711	0.201342	1.08835
BjuVB05G18470	2	0.608931	1.00198	1.69388	0.488121	1.50418
BjuVB01G39460	2	10.947	16.6973	22.939	11.038	25.034
BjuVB01G30320	2	0.614293	1.58123	2.51489	0.518532	1.83274
BjuVA04G12350	2	1.44478	2.25126	5.17385	4.12135	10.2426
BjuVA08G23450	2	0.0971766	6.63896	1.39234	1.64322	9.21966
BjuVB02G04450	2	65.2173	35.6385	156.051	145.782	309.529
BjuVB07G18750	2	7.82255	12.5806	15.894	13.2037	19.4532
BjuVA07G28350	2	1.88558	3.23487	4.7316	2.26563	4.07152
BjuVA07G35600	2	0.192646	0	2.10603	1.78788	6.11459
BjuVA03G40970	2	4.78167	7.9121	13.5108	8.08266	13.1112
BjuVA05G16100	2	1.733	4.37141	6.58674	1.39633	5.64734
BjuVA03G00310	2	3.77917	4.73846	8.79712	5.36056	10.9063
BjuVB06G23560	2	1.34675	3.13688	4.46851	10.9118	21.7867
BjuVB07G45300	2	23.2493	43.3464	46.8843	26.8567	46.9434
BjuVB03G01840	2	34.5383	25.7361	82.1517	19.9762	60.4616
[truncated: 6,943 more rows]
