# Supplementary material for: Transcriptome Dynamics of Brassica juncea Leaves in Response to Omnivorous Beet Armyworm (Spodoptera exigua, Hübner)
Source: Int J Mol Sci. 2023 Nov 24;24(23):16690. doi: 10.3390/ijms242316690 (PMC10706706; doi:10.3390/ijms242316690)
Supplement: Supplementary file 1 [file ijms-24-16690-s001.zip › Table S8.xlsx]

## Sheet: Total BjuGSLs genes
Table S8. Gene expression data involved in glucosinolate biosynthesis and sulfur assimilation pathway after beet armyworm larvae chewing in vegetable mustard.
GSL pathway	Gene name	Description	Gene_ID	CK FPKM	1 h FPKM	24 h FPKM	48 h FPKM	72 h FPKM	1 h/CK Log2FC	24 h/CK Log2FC	48 h/CK Log2FC	72 h/CK Log2FC
Chain elongation	BCAT4	branched-chain amino acid aminotransferase 4	BjuVA03G40640	8.98894	15.6064	36.8982	40.2947	48.9447	-	2.05116	-	2.43113
			BjuVA05G29690	36.6018	63.7402	93.0045	54.736	96.0177	-	1.36027	-	1.37884
			BjuVB01G34920	31.8878	63.6007	110.014	116.298	167.495	1.0194	1.80168	1.86099	2.38148
			BjuVB07G28210	13.3396	19.1076	39.4975	36.2472	43.1006	-	1.58031	-	1.67863
	BCAT6	branched-chain amino acid aminotransferase 6	BjuVA06G02830	0.151124	0.0187307	0	0.0837879	0.0169438	-	-	-	-
			BjuVB04G50200	0.307718	0.179365	0.240956	0.260897	0.375613	-	-	-	-
			BjuVB04G50230	0	0	0	0	0	-	-	-	-
	BAT5	probable sodium/metabolite cotransporter BASS5	BjuVA03G28990	6.16329	13.1832	15.5795	9.34385	11.0844	-	1.3513	-	-
			BjuVA09G26640	8.39636	11.6625	13.9059	9.29392	7.79957	-	-	-	-
			BjuVB08G40000	1.51347	3.26729	5.528	5.22881	4.15302	-	1.88091	1.78023	-
			BjuVB08G30210	9.40156	15.3466	20.1537	11.2471	12.0963	-	1.11424	-	-
	MAM1	methylthioalkylmalate synthase 1	BjuVA02G28980	0	0	0.0290128	0	0	-	-	-	-
			BjuVA02G29820	0	0	0	0	0	-	-	-	-
			BjuVA02G46400	0.054736	0	0.028633	0	0.078051	-	-	-	-
			BjuVA02G46410	1.99086	3.02263	6.06739	4.17498	5.06073	-	1.62072	-	-
			BjuVA03G45950	0	0	0	0	0	-	-	-	-
			BjuVA03G45970	0.342549	0.811558	3.09173	3.93341	5.19606	-	3.18213	3.50788	3.90307
			BjuVB04G02840	0	0	0	0	0	-	-	-	-
			BjuVB05G45600	0	0	0	0	0	-	-	-	-
			BjuVB08G29700	0	0	0	0	0	-	-	-	-
	MAM3	methylthioalkylmalate synthase 3	BjuVA04G26830	0	0	0	0	0	-	-	-	-
	IPMI SSU1	isopropylmalate isomerase small subunit 1	BjuVA03G23460	75.0117	69.7461	83.1252	58.5247	76.9284	-	-	-	-
			BjuVA05G03450	3.12387	3.22851	2.71067	1.64937	1.97426	-	-	-	-
			BjuVB06G03180	5.35218	7.51283	5.57519	5.39205	6.82823	-	-	-	-
			BjuVB08G23140	86.3997	74.389	81.9123	46.5569	72.8059	-	-	-	-
	IPMI SSU2	isopropylmalate isomerase small subunit 2	BjuVA05G03460	16.6295	28.194	48.2147	22.0912	52.6913	-	1.5501	-	1.65114
			BjuVB06G03190	30.7461	54.2234	95.5639	60.3973	99.1241	-	1.65095	-	1.67695
	IIL1	isopropylmalate isomerase large subunit 1	BjuVA04G09200	4.05391	4.85003	6.24589	3.66743	8.00588	-	-	-	-
			BjuVA08G06790	83.8556	99.2228	111.555	75.2108	114.585	-	-	-	-
			BjuVB07G41820	6.34062	9.1179	10.3346	6.16553	9.47668	-	-	-	-
			BjuVB07G41840	40.4547	43.4901	45.1057	38.8134	41.0394	-	-	-	-
	IMDH1	isopropylmalate dehydrogenase 1	BjuVA02G05700	11.7783	33.3089	45.157	18.7593	35.5788	1.52269	1.95318	-	1.5828
			BjuVB05G23390	12.0696	22.4399	44.8918	16.8187	28.6742	-	-	-	-
	BCAT3	branched-chain amino acid aminotransferase 3	BjuVA01G25390	4.99237	5.36683	6.10141	5.38252	6.85236	-	-	-	-
			BjuVA06G17870	16.1965	16.8597	18.3777	12.9276	13.5613	-	-	-	-
			BjuVB05G41430	15.9616	13.7601	15.3557	9.77785	13.8633	-	-	-	-
			BjuVB08G49050	13.1392	14.3174	16.0491	11.7422	14.2861	-	-	-	-
Core structure formation	CYP79A2	phenylalanine N-monooxygenase 2	BjuVA02G01870	0	0	0	0	0	-	-	-	-
			BjuVA10G31460	0	0	0	0.535568	0.530597	-	-	6.11985	-
			BjuVB02G43280	0	0	0.0388728	0	0.0453953	-	-	-	-
			BjuVB02G43290	0	0.0182701	0.0849147	0.477387	0.688276	-	-	-	6.48087
			BjuV_Contig01058_ERROPOS1500000G00170	0	0.123799	0.0215736	0.0187304	0	-	-	-	-
	CYP79F1	cytochrome P450 79F1	BjuVA06G12040	51.5532	75.7421	101.388	52.9847	81.4259	-	-	-	-
			BjuVB06G35270	48.3863	56.0413	89.6738	57.6753	111.834	-	-	-	-
	CYP79C1	cytochrome P450 79C1	BjuVA03G14610	0	0	0	0	0	-	-	-	-
			BjuVB08G33270	0	0	0	0	0	-	-	-	-
			BjuVB08G33310	0	0	0	0	0	-	-	-	-
	CYP79C2	cytochrome P450 79C2	BjuVA02G40210	0	0	0	0	0	-	-	-	-
			BjuVA02G40230	0	0	0	0	0	-	-	-	-
			BjuVA04G31790	0	0	0	0.0382223	0	-	-	-	-
			BjuVA05G10570	0	0	0	0	0	-	-	-	-
			BjuVB01G03470	0	0	0.0184206	0	0.0490941	-	-	-	-
			BjuVB04G07730	0	0	0	0	0	-	-	-	-
			BjuVB06G10190	0	0	0	0	0	-	-	-	-
	CYP83A1	cytochrome P450 83A1	BjuVA04G31780	5.26515	15.8062	18.761	10.1656	9.20255	1.60884	1.84742	-	-
			BjuVA04G08930	185.911	268.154	291.268	147.191	180.351	-	-	-	-
			BjuVB01G03480	1.06976	0.952298	6.4231	3.31869	3.71245	-	2.59803	1.62645	1.78049
			BjuVB06G57170	184.607	229.958	273.808	147.134	195.217	-	-	-	-
	GSTF11	glutathione S-transferase F 11	BjuV_Contig00645G00180	0.359989	0.613263	5.40755	0.675639	0.695008	-	3.91978	-	-
			BjuV_Contig00646G00060	0.285468	1.19072	0.600133	0.945096	0.72083	-	-	-	-
			BjuV_Contig00855G00010	19.2111	36.9596	52.2404	32.6131	53.5668	-	1.4576	-	1.46687
	GSTU20	glutathione S-transferase U 20	BjuVA07G27800	206.22	143.632	509.244	257.999	377.063	-	1.31931	-	-
			BjuVB06G42730	359.819	356.08	771.203	458.487	635.342	-	1.11507	-	-
	UGT74C1	glycosyltransferase 74C1	BjuVA04G24520	15.5126	14.1154	11.9148	16.6192	8.92627	-	-	-	-
			BjuVA05G13440	16.3708	34.3522	34.4897	20.7775	18.887	1.09165	1.08948	-	-
			BjuVB01G11090	10.3852	17.0397	8.65166	11.4474	4.45408	-	-	-	-
			BjuVB06G20800	24.7111	59.5908	52.9932	25.6219	38.1952	1.29274	1.11523	-	-
	SOT17	sulfotransferase 17	BjuVA06G14130	12.1742	31.5117	44.3096	26.939	26.8767	1.39377	1.87773	1.13922	-
			BjuVB04G30410	3.43529	9.46659	10.3306	5.67975	8.04912	1.4827	1.60099	-	-
	CYP79B2	tryptophan N-monooxygenase 2	BjuVA01G00880	9.38615	10.8554	9.17263	16.1804	10.2374	-	-	-	-
			BjuVA03G65070	1.55748	3.48764	2.87101	10.1533	4.43045	-	-	2.69697	1.49613
			BjuVA08G23620	0.119661	0.532886	0.889411	5.33899	3.14509	-	-	5.49612	4.72502
			BjuVB02G75200	0.0181387	0	0.0201805	0.23244	0.0996516	-	-	-	-
			BjuVB03G14260	0.687431	0.612312	1.02554	6.66366	1.41485	-	-	3.27897	-
			BjuVB05G00660	9.4272	8.61173	9.31969	22.0016	16.9586	-	-	1.2176	-
	CYP79B3	tryptophan N-monooxygenase 3	BjuVA04G17260	2.53986	5.1361	3.49386	3.09181	2.27099	-	-	-	-
			BjuVB01G18500	2.50088	6.01042	2.74135	3.52153	1.81997	1.28793	-	-	-
	CYP83B1	CYP83B monooxygenase 1	BjuVA08G07700	37.3084	47.8409	73.4195	76.7636	203.323	-	-	1.03539	2.43475
			BjuVB07G40630	37.4112	53.6647	61.6415	68.1504	160.739	-	-	-	2.09138
	GSTF9	glutathione S-transferase F 9	BjuVA03G16950	144.102	294.497	339.954	159.485	272.452	1.05455	1.2532	-	-
			BjuVA04G23670	88.6449	136.78	240.676	97.5199	207.65	-	1.45624	-	1.21757
			BjuVB01G11760	131.215	157.981	300.745	217.561	345.703	-	1.21186	-	1.38596
			BjuVB08G15580	37.5641	77.4332	64.8045	43.2863	81.6232	1.06764	-	-	-
	GSTF10	glutathione S-transferase F 10	BjuVA03G16960	11.3518	10.0795	9.80631	3.81204	12.4131	-	-	-1.58152	-
			BjuVB08G15590	14.326	7.48011	12.0406	3.96822	15.5492	-	-	-1.8607	-
	GSTU13	glutathione S-transferase U 13	BjuVA07G13870	12.2368	6.87033	17.1499	14.3427	18.0242	-	-	-	-
			BjuVA09G40900	28.3067	12.2203	90.1231	126.276	159.052	-1.18922	1.68579	2.15135	2.47827
			BjuVB03G28420	0.486319	2.1142	1.82285	0.716192	5.05608	-	-	-	3.37909
			BjuVB04G35830	94.6812	34.3103	207.13	273.508	370.079	-1.44161	1.1447	1.52478	1.95537
	GGP3	γ-glutamyl peptidase 3	BjuVA08G19460	1.71161	2.0927	2.24341	1.78016	3.57597	-	-	-	-
			BjuVB03G10670	5.22346	4.24631	6.77996	6.18004	8.38646	-	-	-	-
	GGP1	γ-glutamyl peptidase 1	BjuVA01G07450	33.1307	48.8675	37.3456	23.715	42.5118	-	-	-	-
			BjuVA03G58930	15.1074	22.2169	27.2499	45.7577	94.9487	-	-	1.59359	2.64185
			BjuVA08G19470	7.74715	5.59883	13.0839	24.322	33.2517	-	-	1.64589	2.09298
			BjuVB02G71090	16.04	15.4363	23.13	33.5188	32.552	-	-	1.05823	-
			BjuVB03G10680	4.45849	4.05727	7.85224	13.3393	17.3444	-	-	1.57734	1.95158
			BjuVB05G07180	49.1908	91.9249	142.35	122.4	261.036	-	1.54862	1.30938	2.39626
	SUR1	C-S lyase 1	BjuVA07G00230	40.308	66.4065	94.004	79.9231	130.856	-	1.23664	-	1.68618
			BjuVA09G12580	18.1877	23.3597	20.2829	22.2847	27.5117	-	-	-	-
			BjuVB02G11820	2.00733	1.95452	4.10297	8.43798	9.65274	-	-	2.06585	2.25629
			BjuVB03G59170	19.9682	42.8956	52.9904	37.268	59.8255	1.126	1.42273	-	1.57027
	UGT74B1	glycosyltransferase 74B1	BjuVA09G41160	12.5732	30.7569	30.8615	18.0009	37.0816	1.31258	1.30975	-	1.54685
			BjuVB04G35600	11.6714	22.4568	29.3812	19.0255	34.7827	-	1.34662	-	1.56321
	SOT16	sulfotransferase 16	BjuVA02G24040	22.4207	25.852	62.9662	61.2115	82.0086	-	1.50529	1.44358	1.86073
			BjuVA07G40060	2.53095	6.88795	8.52809	15.6381	29.8089	1.46437	1.76489	2.61783	3.54266
			BjuVB03G46730	3.91002	14.6405	11.8107	9.81618	34.0193	1.92631	1.6085	1.321	3.10773
			BjuVB05G56430	17.3006	23.5461	92.4036	86.8092	101.881	-	2.43262	2.32177	2.54831
	SOT18	sulfotransferase 18	BjuVA07G28730	0.210899	0.0513879	0.144275	0.169671	0.0572824	-	-	-	-
			BjuVA07G29770	0	0	0	0	0.0228477	-	-	-	-
			BjuVA07G29780	0	0.0261005	0.0917594	0	0.0576144	-	-	-	-
			BjuVA07G40020	11.8963	19.0625	32.081	12.7009	13.5199	-	1.44526	-	-
			BjuVA07G40050	0	0.0483678	0	0.0772756	0	-	-	-	-
			BjuVA09G13400	0.444149	0.263101	0.592539	0.448943	0.417972	-	-	-	-
			BjuVA09G17270	0	0	0	0	0	-	-	-	-
			BjuVA09G17280	0	0	0	0	0	-	-	-	-
			BjuVA09G18500	0	0	0	0	0	-	-	-	-
			BjuVA09G18510	0.0276156	0.176559	0	0.0835791	0.0558342	-	-	-	-
			BjuVA09G18530	0.661079	1.14012	0.310423	0.268575	0.530272	-	-	-	-
			BjuVB03G46710	30.7604	67.664	61.5776	29.0221	29.8615	1.15987	-	-	-
			BjuVB03G46720	0	0	0	0	0.0582903	-	-	-	-
			BjuVB04G18000	0.140121	0	0.264779	0.237581	0.0900808	-	-	-	-
			BjuVB04G19070	0.182499	0.223447	0.25546	0.315748	0.796987	-	-	-	-
			BjuVB04G19080	0	0	0	0	0	-	-	-	-
			BjuVB04G19090	0	0	0	0	0	-	-	-	-
			BjuVB06G40590	0.0914395	0.0259936	0	0.0553721	0	-	-	-	-
			BjuVB06G40600	0.0284961	0.387901	2.8342	2.53229	3.69637	-	6.60952	6.42557	6.96522
			BjuVB06G40630	0.561483	0.41486	0.148034	0.486693	0.231445	-	-	-	-
Side chain modification	FMOGS-OX2	flavincontaining monooxygenase 2	BjuVA09G16240	28.3121	56.4618	50.9274	36.476	42.0861	1.01936	-	-	-
			BjuVB04G19990	42.2072	73.0407	74.9028	47.5047	63.9818	-	-	-	-
	FMOGS-OX5	flavincontaining monooxygenase 5	BjuVA08G33430	2.34158	0.942946	1.29629	0.431808	0.668565	-	-	-2.44945	-
			BjuVA09G63790	9.54942	6.84029	8.27612	7.19515	9.76089	-	-	-	-
			BjuVB02G05130	11.8072	10.9543	9.39525	9.59715	11.8922	-	-	-	-
			BjuVB03G04710	0.103442	0.0925353	0.0467377	0.143937	0.0825065	-	-	-	-
	AOP2	2-oxoglutarate-dependent dioxygenase	BjuVA02G29850	11.2814	10.1686	34.126	33.1332	57.8131	-	1.6117	-	2.34501
			BjuVA03G30000	54.9855	76.7534	118.645	82.6452	133.874	-	1.1246	-	1.27177
			BjuVA09G02070	18.074	21.0798	45.5003	22.3283	40.6323	-	1.34671	-	-
			BjuVB05G45660	134.746	108.716	249.344	195.077	442.498	-	-	-	1.70391
			BjuVB08G37450	100.983	98.0128	163.347	106.426	215.322	-	-	-	-
	GSL-OH	2-oxoacid-dependent dioxygenase	BjuVA03G18140	0	0	0	0	0	-	-	-	-
			BjuVA04G23630	0	0	0	0	0	-	-	-	-
			BjuVA04G23640	0	0	0	0	0	-	-	-	-
			BjuVA04G23650	0.0273849	0.0250827	0.0914024	0	0.0224658	-	-	-	-
	SCPL17	serine carboxypeptidase-like 17	BjuVB07G05120	2.89912	2.35397	3.2973	6.70959	3.3874	-	-	1.20544	-
	CYP81F1	cytochrome P450 81F1	BjuVA01G01520	0.428869	1.05386	0.254856	0.172753	0.180503	-	-	-	-
			BjuVA01G01530	0	0	0	0.0665629	0	-	-	-	-
			BjuVB03G36910	0	0	0	0	0	-	-	-	-
			BjuVB05G01380	7.04242	6.94039	2.48951	3.49413	1.41402	-	-1.48189	-1.01778	-2.32242
			BjuVB05G01390	0.560318	0.258883	0.387948	0.162583	0.0418442	-	-	-	-
	CYP81F2	cytochrome P450 81F2	BjuVA02G13370	0.0410643	0.0904208	0.246968	0.0807349	0.216035	-	-	-	-
			BjuVA03G12770	0.0349864	0.0477514	0.0757915	0.0518177	0.150176	-	-	-	-
			BjuVA10G14900	0.018256	0.125483	0.0190998	0.0696445	0.0173548	-	-	-	-
			BjuVB02G26180	0.703688	0.230379	1.15866	2.05704	0.501672	-	-	-	-
			BjuVB05G33110	0.0957337	0	0.217055	0.463221	0.522877	-	-	-	-
			BjuVB08G11260	0	0	0	0	0.044423	-	-	-	-
	CYP81F3	cytochrome P450 81F3	BjuVA01G01560	6.22923	5.88384	4.87914	2.66114	3.88757	-	-	-1.23152	-
			BjuVA08G22990	0.236987	0.371677	0.401635	1.82929	3.46427	-	-	2.95189	3.87316
			BjuVB03G13820	0.623841	0.601479	0.294357	0.325166	0.48914	-	-	-	-
			BjuVB05G01420	5.8536	6.4908	5.82601	5.52387	7.82832	-	-	-	-
	CYP81F4	cytochrome P450 81F4	BjuVA01G01550	0	0	0	0	0	-	-	-	-
			BjuVA08G23000	0	0	0	0	0	-	-	-	-
			BjuVB03G13830	0	0	0	0	0	-	-	-	-
			BjuVB05G01410	0	0.0169609	0	0	0	-	-	-	-
	IGMT1	indole GSL O-methyltransferase 1	BjuVA07G15540	0.749147	0.260786	0.155851	3.83207	0.226668	-	-	2.35538	-
			BjuVA07G15550	29.2811	9.71433	36.6575	61.1829	16.9309	-1.56857	-	1.05727	-
			BjuVB03G08640	21.512	6.48235	37.0056	49.6779	10.6398	-1.70784	-	1.20137	-
			BjuVB03G27400	10.0732	6.44835	8.40827	13.4016	3.34019	-	-	-	-1.60553
			BjuVB03G27410	0.280795	0.324589	0.434463	0.520212	0.178133	-	-	-	-
	IGMT2	indole GSL O-methyltransferase 2	BjuVA08G29450	1.01351	0.538721	0.410765	0.612832	0.692302	-	-	-	-
			BjuVB03G08650	1.06661	0.335076	0.384375	1.00612	0.913669	-	-	-	-
	IGMT5	indole GSL O-methyltransferase 5	BjuVA07G28520	0.282652	0.991243	2.10794	2.49345	4.23254	-	2.90511	3.12436	3.882
			BjuVA07G42350	3.16077	13.3121	17.5354	30.1889	30.2308	2.09586	2.48545	3.24788	3.24478
			BjuVB03G49630	0.134367	0.264022	0.161236	4.00027	0.881258	-	-	-	-
sulfur assimilation	APK1	adenylyl-sulfate kinase 1	BjuVA03G44710	13.3924	32.5041	29.3211	14.6963	36.0456	1.30087	-	-	-
			BjuVA09G10500	14.9193	45.0538	47.9942	15.4621	47.5404	1.6169	1.70012	-	1.65865
			BjuVB02G09040	8.17815	18.3418	18.8083	8.92927	14.2917	1.18755	-	-	-
			BjuVB06G31820	16.5649	42.0635	42.0834	23.9905	41.0475	1.36712	1.35967	-	1.29636
	APK2	adenylyl-sulfate kinase 2	BjuVA01G00870	3.08678	6.93701	7.80178	5.3802	3.31045	-	-	-	-
			BjuVA03G65090	5.10427	22.0729	19.9739	20.3474	27.3507	2.1334	1.98174	1.98774	2.40827
			BjuVA08G23630	1.14536	2.05158	4.42796	9.55552	7.97865	-	1.9605	3.05005	2.78321
			BjuVB02G75210	12.665	26.502	37.4546	31.3417	37.7134	1.08735	1.57838	1.30088	1.56084
			BjuVB03G14270	0	0	0	0	0	-	-	-	-
			BjuVB05G00650	3.20112	7.00583	7.52908	6.31008	6.09915	-	-	-	-
	APR1	5′-adenylylsulfate reductase 1	BjuVA02G30120	1.63081	2.12173	2.18249	3.0629	1.09482	-	-	-	-
			BjuVA09G25770	2.8132	9.38809	13.2072	1.28322	5.34032	1.76167	2.24594	-	-
			BjuVB08G39000	6.62869	14.6788	11.9733	1.57196	7.17591	1.17102	-	-2.07981	-
	APR2	5′-adenylylsulfate reductase 2	BjuVA03G67730	229.056	315.273	180.026	38.5994	82.877	-	-	-2.57459	-1.47546
	APR3	5′-adenylylsulfate reductase 3	BjuVA01G13820	9.35451	26.7173	27.2476	4.759	25.6847	1.53731	1.55707	-	-
			BjuVA03G52340	26.5455	46.952	38.1252	7.99768	16.52	-	-	-1.73776	-
			BjuVB02G66080	54.4714	97.1658	99.9281	16.5713	49.1914	-	-	-1.72304	-
			BjuVB05G14760	6.9867	22.4162	14.2441	1.76627	12.2958	1.7043	-	-1.99245	-
	APS1	ATP sulfurylase 1	BjuVA03G42260	35.9599	57.7113	59.0822	16.4378	43.9843	-	-	-	-
			BjuVA05G25980	64.3354	113.465	110.205	62.3487	130.287	-	-	-	-
			BjuVB01G31300	39.9111	86.8748	51.3169	38.8591	63.5499	1.14601	-	-	-
			BjuVB03G23540	90.6872	143.706	93.0014	34.9922	77.3723	-	-	-1.37967	-
	APS3	ATP sulfurylase 3	BjuVA01G23530	11.3783	23.5711	31.8113	31.8519	22.8939	1.07269	1.49751	1.47868	-
			BjuVB05G21040	23.4539	42.2231	78.6747	62.0376	47.902	-	1.76039	1.39728	-
	GSH1	glutathione synthetase 1	BjuVA01G14870	53.9275	51.949	64.8832	58.0397	88.0376	-	-	-	-
			BjuVA03G53140	14.5957	11.9414	13.9241	11.8166	13.4591	-	-	-	-
			BjuVB02G66750	8.17625	10.9368	8.20007	10.2878	17.2757	-	-	-	-
			BjuVB03G20430	2.06298	3.2031	1.03526	1.37758	1.21379	-	-	-	-
			BjuVB05G13800	54.5911	56.6964	89.0446	70.2154	105.629	-	-	-	-
	GSH2	glutathione synthetase 2	BjuVA06G36670	8.70195	14.078	21.6381	30.8956	57.665	-	1.3296	1.82242	2.71783
			BjuVA09G04920	9.80111	12.3489	18.1417	11.071	32.9617	-	-	-	1.73948
			BjuVB02G65640	20.5695	20.435	17.8733	16.3956	15.4124	-	-	-	-
			BjuVB07G21460	16.1092	18.4798	25.6929	17.6219	42.1958	-	-	-	1.37879
	OASA1	cysteine synthase	BjuVA01G23200	31.8499	28.6886	27.5181	23.9922	25.385	-	-	-	-
			BjuVA08G11870	38.1076	33.2508	42.0729	26.4834	36.7485	-	-	-	-
			BjuVB05G20830	55.0813	51.3046	51.6098	44.4355	45.2792	-	-	-	-
			BjuVB07G36550	35.548	40.9501	47.4095	25.2524	34.3927	-	-	-	-
Note: "-" represents that the expression of the gene has not been detected in the leaves, or the foldchange and statistical analysis cannot be performed due to the poor reproducibility of the gene expression among the biological replicates.
(Yellow: differential expression genes; Red: up-regulated; Green: down-regulated)

## Sheet: AGSL BjuA DEGs
GSL pathway	Gene name	Description	Gene_ID	CK FPKM	1 h FPKM	24 h FPKM	48 h FPKM	72 h FPKM	1 h/CK Log2FC	24 h/CK Log2FC	48 h/CK Log2FC	72 h/CK Log2FC
Chain elongation	BCAT4	branched-chain amino acid aminotransferase 4	BjuVA03G40640	8.98894	15.6064	36.8982	40.2947	48.9447	-	2.05116	-	2.43113
			BjuVA05G29690	36.6018	63.7402	93.0045	54.736	96.0177	-	1.36027	-	1.37884
	BAT5	probable sodium/metabolite cotransporter BASS5	BjuVA03G28990	6.16329	13.1832	15.5795	9.34385	11.0844	-	1.3513	-	-
	MAM1	methylthioalkylmalate synthase 1	BjuVA02G46410	1.99086	3.02263	6.06739	4.17498	5.06073	-	1.62072	-	-
			BjuVA03G45970	0.342549	0.811558	3.09173	3.93341	5.19606	-	3.18213	3.50788	3.90307
	IPMI SSU2	isopropylmalate isomerase small subunit 2	BjuVA05G03460	16.6295	28.194	48.2147	22.0912	52.6913	-	1.5501	-	1.65114
	IMDH1	isopropylmalate dehydrogenase 1	BjuVA02G05700	11.7783	33.3089	45.157	18.7593	35.5788	1.52269	1.95318	-	1.5828
Core structure formation	CYP83A1	cytochrome P450 83A1	BjuVA04G31780	5.26515	15.8062	18.761	10.1656	9.20255	1.60884	1.84742	-	-
	GSTU20	glutathione S-transferase U 20	BjuVA07G27800	206.22	143.632	509.244	257.999	377.063	-	1.31931	-	-
	UGT74C1	glycosyltransferase 74C1	BjuVA05G13440	16.3708	34.3522	34.4897	20.7775	18.887	1.09165	1.08948	-	-
	SOT17	sulfotransferase 17	BjuVA06G14130	12.1742	31.5117	44.3096	26.939	26.8767	1.39377	1.87773	1.13922	-
	GGP1	γ-glutamyl peptidase 1	BjuVA03G58930	15.1074	22.2169	27.2499	45.7577	94.9487	-	-	1.59359	2.64185
			BjuVA08G19470	7.74715	5.59883	13.0839	24.322	33.2517	-	-	1.64589	2.09298
	SUR1	C-S lyase 1	BjuVA07G00230	40.308	66.4065	94.004	79.9231	130.856	-	1.23664	-	1.68618
	UGT74B1	glycosyltransferase 74B1	BjuVA09G41160	12.5732	30.7569	30.8615	18.0009	37.0816	1.31258	1.30975	-	1.54685
	SOT16	sulfotransferase 16	BjuVA02G24040	22.4207	25.852	62.9662	61.2115	82.0086	-	1.50529	1.44358	1.86073
			BjuVA07G40060	2.53095	6.88795	8.52809	15.6381	29.8089	1.46437	1.76489	2.61783	3.54266
	SOT18	sulfotransferase 18	BjuVA07G40020	11.8963	19.0625	32.081	12.7009	13.5199	-	1.44526	-	-
Side chain modification	FMOGS-OX2	flavincontaining monooxygenase 2	BjuVA09G16240	28.3121	56.4618	50.9274	36.476	42.0861	1.01936	-	-	-
	FMOGS-OX5	flavincontaining monooxygenase 5	BjuVA08G33430	2.34158	0.942946	1.29629	0.431808	0.668565	-	-	-2.44945	-
	AOP2	2-oxoglutarate-dependent dioxygenase	BjuVA02G29850	11.2814	10.1686	34.126	33.1332	57.8131	-	1.6117	-	2.34501
			BjuVA03G30000	54.9855	76.7534	118.645	82.6452	133.874	-	1.1246	-	1.27177
			BjuVA09G02070	18.074	21.0798	45.5003	22.3283	40.6323	-	1.34671	-	-
sulfur assimilation	APK1	adenylyl-sulfate kinase 1	BjuVA03G44710	13.3924	32.5041	29.3211	14.6963	36.0456	1.30087	-	-	-
			BjuVA09G10500	14.9193	45.0538	47.9942	15.4621	47.5404	1.6169	1.70012	-	1.65865
	APK2	adenylyl-sulfate kinase 2	BjuVA03G65090	5.10427	22.0729	19.9739	20.3474	27.3507	2.1334	1.98174	1.98774	2.40827
			BjuVA08G23630	1.14536	2.05158	4.42796	9.55552	7.97865	-	1.9605	3.05005	2.78321
	APR1	5′-adenylylsulfate reductase 1	BjuVA09G25770	2.8132	9.38809	13.2072	1.28322	5.34032	1.76167	2.24594	-	-
	APR2	5′-adenylylsulfate reductase 2	BjuVA03G67730	229.056	315.273	180.026	38.5994	82.877	-	-	-2.57459	-1.47546
	APR3	5′-adenylylsulfate reductase 3	BjuVA01G13820	9.35451	26.7173	27.2476	4.759	25.6847	1.53731	1.55707	-	-
			BjuVA03G52340	26.5455	46.952	38.1252	7.99768	16.52	-	-	-1.73776	-
	APS3	ATP sulfurylase 3	BjuVA01G23530	11.3783	23.5711	31.8113	31.8519	22.8939	1.07269	1.49751	1.47868	-
	GSH2	glutathione synthetase 2	BjuVA06G36670	8.70195	14.078	21.6381	30.8956	57.665	-	1.3296	1.82242	2.71783
			BjuVA09G04920	9.80111	12.3489	18.1417	11.071	32.9617	-	-	-	1.73948
Note: "-" represents that the expression of the gene has not been detected in the leaves, or the foldchange and statistical analysis cannot be performed due to the poor reproducibility of the gene expression among the biological replicates.
(Yellow: differential expression genes; Red: up-regulated; Green: down-regulated)

## Sheet: AGSL BjuB DEGs
GSL pathway	Gene name	Description	Gene_ID	CK FPKM	1 h FPKM	24 h FPKM	48 h FPKM	72 h FPKM	1 h/CK Log2FC	24 h/CK Log2FC	48 h/CK Log2FC	72 h/CK Log2FC
Chain elongation	BCAT4	branched-chain amino acid aminotransferase 4	BjuVB01G34920	31.8878	63.6007	110.014	116.298	167.495	1.0194	1.80168	1.86099	2.38148
			BjuVB07G28210	13.3396	19.1076	39.4975	36.2472	43.1006	-	1.58031	-	1.67863
	BAT5	probable sodium/metabolite cotransporter BASS5	BjuVB08G40000	1.51347	3.26729	5.528	5.22881	4.15302	-	1.88091	1.78023	-
			BjuVB08G30210	9.40156	15.3466	20.1537	11.2471	12.0963	-	1.11424	-	-
	IPMI SSU2	isopropylmalate isomerase small subunit 2	BjuVB06G03190	30.7461	54.2234	95.5639	60.3973	99.1241	-	1.65095	-	1.67695
Core structure formation	CYP83A1	cytochrome P450 83A1	BjuVB01G03480	1.06976	0.952298	6.4231	3.31869	3.71245	-	2.59803	1.62645	1.78049
	GSTU20	glutathione S-transferase U 20	BjuVB06G42730	359.819	356.08	771.203	458.487	635.342	-	1.11507	-	-
	UGT74C1	glycosyltransferase 74C1	BjuVB06G20800	24.7111	59.5908	52.9932	25.6219	38.1952	1.29274	1.11523	-	-
	SOT17	sulfotransferase 17	BjuVB04G30410	3.43529	9.46659	10.3306	5.67975	8.04912	1.4827	1.60099	-	-
	GGP1	γ-glutamyl peptidase 1	BjuVB02G71090	16.04	15.4363	23.13	33.5188	32.552	-	-	1.05823	-
			BjuVB03G10680	4.45849	4.05727	7.85224	13.3393	17.3444	-	-	1.57734	1.95158
			BjuVB05G07180	49.1908	91.9249	142.35	122.4	261.036	-	1.54862	1.30938	2.39626
	SUR1	C-S lyase 1	BjuVB02G11820	2.00733	1.95452	4.10297	8.43798	9.65274	-	-	2.06585	2.25629
			BjuVB03G59170	19.9682	42.8956	52.9904	37.268	59.8255	1.126	1.42273	-	1.57027
	UGT74B1	glycosyltransferase 74B1	BjuVB04G35600	11.6714	22.4568	29.3812	19.0255	34.7827	-	1.34662	-	1.56321
	SOT16	sulfotransferase 16	BjuVB03G46730	3.91002	14.6405	11.8107	9.81618	34.0193	1.92631	1.6085	1.321	3.10773
			BjuVB05G56430	17.3006	23.5461	92.4036	86.8092	101.881	-	2.43262	2.32177	2.54831
	SOT18	sulfotransferase 18	BjuVB03G46710	30.7604	67.664	61.5776	29.0221	29.8615	1.15987	-	-	-
			BjuVB06G40600	0.0284961	0.387901	2.8342	2.53229	3.69637	-	6.60952	6.42557	6.96522
Side chain modification	AOP2	2-oxoglutarate-dependent dioxygenase	BjuVB05G45660	134.746	108.716	249.344	195.077	442.498	-	-	-	1.70391
	SCPL17	serine carboxypeptidase-like 17	BjuVB07G05120	2.89912	2.35397	3.2973	6.70959	3.3874	-	-	1.20544	-
sulfur assimilation	APK1	adenylyl-sulfate kinase 1	BjuVB02G09040	8.17815	18.3418	18.8083	8.92927	14.2917	1.18755	-	-	-
			BjuVB06G31820	16.5649	42.0635	42.0834	23.9905	41.0475	1.36712	1.35967	-	1.29636
	APK2	adenylyl-sulfate kinase 2	BjuVB02G75210	12.665	26.502	37.4546	31.3417	37.7134	1.08735	1.57838	1.30088	1.56084
	APR1	5′-adenylylsulfate reductase 1	BjuVB08G39000	6.62869	14.6788	11.9733	1.57196	7.17591	1.17102	-	-2.07981	-
	APR3	5′-adenylylsulfate reductase 3	BjuVB02G66080	54.4714	97.1658	99.9281	16.5713	49.1914	-	-	-1.72304	-
			BjuVB05G14760	6.9867	22.4162	14.2441	1.76627	12.2958	1.7043	-	-1.99245	-
	APS1	ATP sulfurylase 1	BjuVB01G31300	39.9111	86.8748	51.3169	38.8591	63.5499	1.14601	-	-	-
			BjuVB03G23540	90.6872	143.706	93.0014	34.9922	77.3723	-	-	-1.37967	-
	APS3	ATP sulfurylase 3	BjuVB05G21040	23.4539	42.2231	78.6747	62.0376	47.902	-	1.76039	1.39728	-
	GSH2	glutathione synthetase 2	BjuVB07G21460	16.1092	18.4798	25.6929	17.6219	42.1958	-	-	-	1.37879
Note: "-" represents that the expression of the gene has not been detected in the leaves, or the foldchange and statistical analysis cannot be performed due to the poor reproducibility of the gene expression among the biological replicates.
(Yellow: differential expression genes; Red: up-regulated; Green: down-regulated)
