# Supplementary material for: Transcriptome Dynamics of Brassica juncea Leaves in Response to Omnivorous Beet Armyworm (Spodoptera exigua, Hübner)
Source: Int J Mol Sci. 2023 Nov 24;24(23):16690. doi: 10.3390/ijms242316690 (PMC10706706; doi:10.3390/ijms242316690)
Supplement: Supplementary file 1 [file ijms-24-16690-s001.zip › Table S9.xlsx]

## Sheet: Sheet1
Table S9. Gene expression data involved in glucosinolate transcription factors (MYB and MYC) after beet armyworm larvae chewing in vegetable mustard.
Gene name	At_ID	Gene_ID	1 h/CK Log2FC	24 h/CK Log2FC	48 h/CK Log2FC	72 h/CK Log2FC
MYB28	At5G61420	BjuVB04G02480	-	-1.03735	-	-1.66369
		BjuVA09G07110	-	-	-1.21942	-
		BjuVB07G18980	-	-	-2.71485	-1.32397
		BjuVA02G46870	-	-	-2.20165	-1.83281
		BjuVB02G62200	-	-	-1.52934	-
		BjuVA03G46500	-	-	-	-
MYB29	At5G07690	BjuVA10G29940	2.92626	-	-	4.22169
		BjuVB08G01780	-	-	-	-
		BjuVA03G03090	-	-	-	-
		BjuVB02G41210	-	-	-	-
MYB34	At5G60890	BjuVB07G19270	-	-	-	-
		BjuVA02G46480	-	-	5.30983	-
		BjuVA03G46050	-	-	-	-
		BjuVB02G62590	-	-	-	-
		BjuVA09G06870	-	-	-	-
		BjuVB04G02790	-	-	-	-
MYB51	At1G18570	BjuVA08G30790	-	-	-	-
		BjuVB03G07340	-	-	-	-
		BjuVB03G26160	-	-	1.61833	-2.31223
		BjuVB04G30350	-	-	-	-
		BjuVA06G14100	-	-	-	-
		BjuVA09G59690	-	-	-	-
MYB122	At1G74080	BjuVB05G56420	-	-	-	-
		BjuVB03G46700	-	-	-	-
		BjuVA02G24030	-	-	-	-
		BjuVA07G40010	-	-	-	-
MYC2	AT1G32640	BjuVB04G42830	-	-	1.56515	2.06043
		BjuVA05G24810	-	1.13625	1.28432	1.15598
		BjuVB03G15700	-	-	1.08041	-
		BjuVB03G32300	-	-	-	-
MYC3	AT5G46760	BjuVA06G44820	-	-	-	1.53793
		BjuVB04G14630	-	-	1.47607	2.05718
		BjuVB02G49380	-	-	-	-
		BjuVA09G22490	-	-	-	-
MYC4	AT4G17880	BjuVA01G10120	1.71548	-	-	-
		BjuVB05G18190	1.06396	-	-1.81258	-1.66111
Note: "-" represents that the expression of the gene has not been detected in the leaves, or the foldchange and statistical analysis cannot be performed due to the poor reproducibility of the gene expression among the biological replicates.
(Yellow: differential expression genes; Red: up-regulated; Green: down-regulated)
