# Supplementary material for: Transcriptome Dynamics of Brassica juncea Leaves in Response to Omnivorous Beet Armyworm (Spodoptera exigua, Hübner)
Source: Int J Mol Sci. 2023 Nov 24;24(23):16690. doi: 10.3390/ijms242316690 (PMC10706706; doi:10.3390/ijms242316690)
Supplement: Supplementary file 1 [file ijms-24-16690-s001.zip › Table S10.xlsx]

## Sheet: Sheet1
Table S10. Gene expression data involved in jasmonic acid biosynthesis pathway after beet armyworm larvae chewing in vegetable mustard.
	Gene name	Description	At_ID	Gene_ID	1 h/CK Log2FC	24 h/CK Log2FC	48 h/CK Log2FC	72 h/CK Log2FC
Plastid	LOX2	lipoxygenase 2	AT3G45140	BjuVB06G44180	2.42016	4.24477	4.51741	4.96554
				BjuVA07G26520	1.05932	2.69999	2.86456	3.31228
				BjuVA02G17410	2.91358	8.30578	9.37644	9.21732
				BjuVB05G48800	-	3.07839	3.04745	2.74985
				BjuVB03G37970	-	7.24384	7.08333	6.73209
				BjuVB03G37990	-	4.85269	4.3863	5.28176
				BjuVA07G32420	-	-	-	8.65327
				BjuVA07G32430	-	-	-	5.90769
				BjuVB03G37980	-	-	-	-
				BjuVB03G38000	-	-	-	-
				BjuVA07G32440	-	-	-	-
	LOX3	lipoxygenase 3	AT1G17420	BjuVB03G06800	-	2.74101	3.57236	4.30039
				BjuVA08G31330	-	3.03856	3.89984	5.59197
				BjuVA09G60220	-	2.81519	3.23356	4.67316
				BjuVB03G25690	-	2.72762	3.14374	4.55943
	LOX4	lipoxygenase 4	AT1G72520	BjuVB05G55580	-	1.92432	2.24728	-
				BjuVA02G23080	-	1.80804	2.98028	-
	LOX6	lipoxygenase 6	AT1G67560	BjuVB03G38340	-	-	1.28002	-
				BjuVA02G19300	-	-	1.26523	1.34522
				BjuVA07G32670	-	-	-	-
				BjuVB05G51340	-	-	-	-
	AOS	allene oxide synthase	AT5G42650	BjuVA02G32670	2.39371	2.9699	4.54468	5.50029
				BjuVB04G12840	-	2.96727	3.75463	4.76094
	AOC2	allene oxide cyclase 2	AT3G25770	BjuVB04G13120	3.85722	3.9811	5.53728	6.9871
				BjuVA06G41670	5.9947	-	4.84241	7.70034
				BjuVB02G52840	4.98875	-	5.88896	7.64388
				BjuVA09G24600	-	-	5.28949	8.76837
	AOC3	allene oxide cyclase 3	AT3G25780	BjuVB04G13110	-	2.86002	3.91895	5.75382
				BjuVA09G24620	-	2.73533	3.36442	5.00444
				BjuVA06G41660	-	-	-	-
	AOC4	allene oxide cyclase 4	AT1G13280	BjuVA08G32830	-	-	-	-
				BjuVB03G05310	-	-	-	-
Peroxisome	OPR3	oxophytodienoate-reductase 3	AT2G06050	BjuVB02G08430	-	3.14765	3.35966	4.01728
				BjuVA03G44220	-	2.40108	2.70131	4.23236
	OPCL1	OPC-8:0-CoA ligase 1	AT1G20510	BjuVA08G29770	-	3.33029	3.82131	4.66571
				BjuVB03G08340	-	3.15018	3.88112	4.64152
	ACX1	acyl-CoA oxidase 1	AT4G16760	BjuVA01G21140	-	-	-	-
				BjuVB05G19200	-	-	-	-
	ACX5	acyl-CoA oxidase 5	AT2G35690	BjuVA03G19290	-	-	-	-
				BjuVB08G18260	-	-	-	-
	MFP2	multifunctional protein 2	AT3G06860	BjuVA05G41370	-	-	1.17807	-
				BjuVB03G23050	-	-	-	-
				BjuVB01G46120	-	-	-	-
				BjuVA03G34320	-	-	-	-
				BjuV_Contig00342G00050	-	-	-	-
				BjuVB07G01540	-	-	-	-
	KAT1	3-ketoacyl-CoA thiolase 1	AT1G04710	BjuVA08G37380	-	-	-	-
				BjuVB03G00890	-	-	-	-
	KAT2	3-ketoacyl-CoA thiolase 2	AT2G33150	BjuVA05G12050	-	-	-	1.27139
				BjuVB06G22080	-	-	2.6498	2.06159
				BjuVB08G17120	-	-	3.1894	3.77087
				BjuVA04G25450	-	-	-	-
				BjuVA03G18220	-	-	-	-
				BjuVB01G10140	-	-	-	-
α-Linolenic Acid synthesis-related genes	FAD2	fatty acid desaturase 2	AT3G12120	BjuVB01G42140	-	-	-	-
				BjuVA05G37350	-	-	-	-
				BjuVB07G05040	-	-	-	-
	FAD3	fatty acid desaturase 3	AT2G29980	BjuVA04G22890	-	-	-1.37127	-
				BjuVB06G19330	-	-	-	-
				BjuVA05G15080	-	-	-	-
				BjuVA03G16410	-	-	-	-
				BjuVB08G15030	-	-	-	-
				BjuVB01G12560	-	-	-	-
	FAD4	fatty acid desaturase 4	AT4G27030	BjuVB03G11890	-	-	-	-5.45844
				BjuVB05G10250	-	-	-	-
				BjuVA08G20980	-	-	-	-
				BjuVA01G18900	-	-	-	-
				BjuVB02G68980	-	-	-	-
				BjuVB03G11900	-	-	-	-
				BjuVA08G21020	-	-	-	-
				BjuVA03G55990	-	-	-	-
	FAD5	fatty acid desaturase 5	AT3G15850	BjuVB01G38640	-	-	-	-
				BjuVB07G30080	-	-	-	-
				BjuVA03G38760	-	-	-	-
				BjuVA05G33630	-	-	-	-
	FAD6	fatty acid desaturase 6	AT4G30950	BjuVB03G10480	-	-	-	-
				BjuVB05G06860	-	-	-	-
				BjuVA01G07110	-	-	-	-
				BjuVA08G19220	-	-	-	-
	FAD7	fatty acid desaturase 7	AT3G11170	BjuVA05G38330	-	-	-1.18601	-1.07692
				BjuVA03G36250	-	-	-1.31201	-1.11091
				BjuVB07G32910	-	-	-	-
				BjuVB01G43040	-	-	-	-
	FAD8	fatty acid desaturase 8	AT5G05580	BjuV_Contig01058_ERROPOS1500000G00020	-	-	-2.70148	-2.21134
				BjuVA02G01990	-	-	-2.51403	-3.94297
	PLA	phospholipase A1	AT2G44810	BjuVB06G04480	-	-	-	6.32646
				BjuVA05G04850	-	-	-	-
Note: "-" represents that the expression of the gene has not been detected in the leaves, or the foldchange and statistical analysis cannot be performed due to the poor reproducibility of the gene expression among the biological replicates.
(Yellow: differential expression genes)
