# Supplementary material for: Transcriptome Dynamics of Brassica juncea Leaves in Response to Omnivorous Beet Armyworm (Spodoptera exigua, Hübner)
Source: Int J Mol Sci. 2023 Nov 24;24(23):16690. doi: 10.3390/ijms242316690 (PMC10706706; doi:10.3390/ijms242316690)
Supplement: Supplementary file 1 [file ijms-24-16690-s001.zip › Table S11.xlsx]

## Sheet: auxin
Table S11. Gene expression data involved in other hormones biosynthesis pathway after beet armyworm larvae chewing in vegetable mustard.
Gene name	Description	At_ID	Gene_ID	1 h/CK Log2FC	24 h/CK Log2FC	48 h/CK Log2FC	72 h/CK Log2FC
YUCCA1	YUC flavin-containing monooxygenase 1	AT4G32540	BjuVA01G05840	-	-	-	-
			BjuVA08G18260	-	-	-	-
			BjuVB03G09600	-	-	-	-
			BjuVB05G05470	-	-	-	-
YUCCA2	YUC flavin-containing monooxygenase 2	AT4G13260	BjuVB07G41650	-	-	-	-
YUCCA3	YUC flavin-containing monooxygenase 3	AT1G04610	BjuVB06G39310	-	-	-	-
			BjuVA09G67620	-	-	-	-
			BjuVA10G03040	-	-	-	-
			BjuVB02G00960	-	-	-	-
YUCCA4	YUC flavin-containing monooxygenase 4	AT5G11320	BjuVA02G04300	-	-	-	-
			BjuVB05G24980	-	-	-	-
			BjuVA10G26760	-	-	-	-
			BjuVB02G38650	-	-	-	-
YUCCA5	YUC flavin-containing monooxygenase 5	AT5G43890	BjuVB04G12300	-	-	-	-
			BjuVA02G33650	-	-	-	-
			BjuVA06G46770	-	-	-	-
			BjuVB02G47760	-	-	-	-
YUCCA6	YUC flavin-containing monooxygenase 6	AT5G25620	BjuVA06G35240	-	-	-	-
			BjuVA02G45150	-	-	-	-
			BjuVB04G03830	-	-	-	-
			BjuVB07G20390	-	-	-	-
			BjuVA09G05820	-	-	-	-
			BjuVB02G64610	-	-	-	-
YUCCA7	YUC flavin-containing monooxygenase 7	AT2G33230	BjuVB06G22170	-	-	-	-
			BjuVA05G11880	-	-	-	-
			BjuVB06G22160	-	-	-	-
YUCCA8	YUC flavin-containing monooxygenase 8	AT4G28720	BjuVA01G09410	-	-	4.43809	-
			BjuVB05G08650	-	-	-	-
			BjuVA08G20310	-	-	-	-
			BjuVB03G11310	-	-	2.76308	-
YUCCA9	YUC flavin-containing monooxygenase 9	AT1G04180	BjuVB06G39720	-	-	-	-
			BjuVB02G00680	-	-	-	-
			BjuVA09G67880	-	-	-	-
			BjuVA10G02550	-	-	-	-
YUCCA10	YUC flavin-containing monooxygenase 10	AT1G48910	BjuVA06G03590	-	-	-	-
			BjuVA06G03620	-	-	-	-
			BjuVB04G51180	-	-	-	-
YUC11	Flavin-binding monooxygenase family protein	AT1G21430	BjuVA06G17320	-	-	-	-
			BjuVB04G32940	-	-	-	-
ASB1	anthranilate synthase beta subunit 1	AT1G25220	BjuVB07G20240	-	-	-	-
			BjuVB03G17480	1.1692	1.26744	1.01195	2.47226
			BjuVA08G27150	1.12946	-	-	1.96506
			BjuVA09G39400	-	-	-	-
			BjuVB04G37140	-	-	-	-
			BjuVB03G29110	-	-	-	-
TAA1	tryptophan aminotransferase of Arabidopsis 1	AT1G70560	BjuVA02G21720	-	-	-	-
			BjuVB05G54070	-	-	-1.25743	-
			BjuVA07G37150	-	-	-	-
			BjuVB03G43080	-	-	-	-
CYP79B2	tryptophan N-monooxygenase 2	AT4G39950	BjuVB03G14260	-	-	3.27897	-
CYP79B3	tryptophan N-monooxygenase 3	AT2G22330	BjuVB01G18500	1.28793	-	-	-
			BjuVA04G17260	-	-	-	-
Note: "-" represents that the expression of the gene has not been detected in the leaves, or the foldchange and statistical analysis cannot be performed due to the poor reproducibility of the gene expression among the biological replicates.
(Yellow: differential expression genes)

## Sheet: abscisic acid
Table S11. Gene expression data involved in other hormones biosynthesis pathway after beet armyworm larvae chewing in vegetable mustard.																Table S11. Gene expression data involved in other hormones biosynthesis pathway after beet armyworm chewing in vegetable mustard.																Table S11. Gene expression data involved in other hormones biosynthesis pathway after beet armyworm chewing in vegetable mustard.																Table S11. Gene expression data involved in other hormones biosynthesis pathway after beet armyworm chewing in vegetable mustard.
Gene name	Description	At_ID	Gene_ID	1 h/CK Log2FC	24 h/CK Log2FC	48 h/CK Log2FC	72 h/CK Log2FC
ABA1	abscisic acid (ABA)-deficient 4	AT5G67030	BjuVA07G17100	-	-	-	-
			BjuVB06G15660	-	-	-	-
			BjuVA09G09530	-	-2.02348	-2.30313	-1.81573
			BjuVB07G16610	-	-1.47283	-	-
ABA4	abscisic acid (ABA)-deficient 4	AT1G67080	BjuVA02G18870	-	-	-	-
			BjuVB05G50840	-	-	-	-
NCED2	9-cis-epoxycarotenoid dioxygenase 2	AT4G18350	BjuVB02G58600	-	-	-	-
			BjuVB05G17870	-	-	-	-
			BjuVA03G50510	-	-	-	-
			BjuVA01G10500	-	-	-	-
NCED3	9-cis-epoxycarotenoid dioxygenase 3	AT3G14440	BjuVB01G40050	-	-	-1.32594	-
			BjuVB07G06730	-1.09507	-	-	-
			BjuVA05G35130	-	-	-	-
			BjuVA01G40500	-1.0413	-	-	-1.60576
			BjuVB07G30890	-	-	2.40117	-
			BjuVA03G38110	-	-	-	-
NCED5	9-cis-epoxycarotenoid dioxygenase 5	AT1G30100	BjuVA09G36590	-	-	-	-
			BjuVB04G40120	-	-	-	-
NCED6	9-cis-epoxycarotenoid dioxygenase 6	AT3G24220	BjuVB01G29800	-	-	6.28045	6.13847
			BjuVA07G08490	-	-	-	-
NCED9	9-cis-epoxycarotenoid dioxygenase 9	AT1G78390	BjuVB03G51030	-	-	-	-
			BjuVA07G43540	-	-	-	-
			BjuVA02G26620	-	-	-	-
			BjuVB05G59220	-	-	-	-
AAO3	abscisic aldehyde oxidase 3	AT2G27150	BjuVA04G20930	-	-	-	-
			BjuVB01G14620	-	-	-	-
Note: "-" represents that the expression of the gene has not been detected in the leaves, or the foldchange and statistical analysis cannot be performed due to the poor reproducibility of the gene expression among the biological replicates.
(Yellow: differential expression genes)

## Sheet: ethylene
Table S11. Gene expression data involved in other hormones biosynthesis pathway after beet armyworm larvae chewing in vegetable mustard.																Table S11. Gene expression data involved in other hormones biosynthesis pathway after beet armyworm chewing in vegetable mustard.																Table S11. Gene expression data involved in other hormones biosynthesis pathway after beet armyworm chewing in vegetable mustard.																Table S11. Gene expression data involved in other hormones biosynthesis pathway after beet armyworm chewing in vegetable mustard.
Gene name	Description	At_ID	Gene_ID	1 h/CK Log2FC	24 h/CK Log2FC	48 h/CK Log2FC	72 h/CK Log2FC
ACS2	1-amino-cyclopropane-1-carboxylate synthase 2	AT1G01480	BjuVA10G00400	-	-	-	-
			BjuVB03G33380	-	-	-	-
ACS4	1-amino-cyclopropane-1-carboxylate synthase 4	AT2G22810	BjuVA04G17890	-	-	-	-
			BjuVB01G17920	-	-	-	-
ACS5	1-amino-cyclopropane-1-carboxylate synthase 5	AT5G65800	BjuVA09G09120	-	-	-	-
			BjuVA06G31680	-	-	-	-
			BjuVB04G00480	-	-	-	-
			BjuVB06G14860	-	-	-	-
			BjuVB07G16970	-	-	-	-
			BjuVA02G49140	-	-	-	-
ACS6	1-amino-cyclopropane-1-carboxylate synthase 6	AT4G11280	BjuVB08G40660	-1.12814	-	-	-2.14057
			BjuVA09G27370	-1.93047	-	-	-2.52137
			BjuVB05G46920	-	-	-	-3.15741
ACS7	1-amino-cyclopropane-1-carboxylate synthase 7	AT4G26200	BjuVB02G68580	-	-	-	-
			BjuVA03G55450	-	-	-	-
			BjuVA01G18150	-	-	-	-
			BjuVB05G10930	-	-	-	-
ACS8	1-amino-cyclopropane-1-carboxylate synthase 8	AT4G37770	BjuVA01G01290	-	-	4.10969	-
			BjuVA08G23210	-	-	3.20231	-
			BjuVB05G01150	-	-	2.12143	-
			BjuVB03G13960	-	-	3.15276	-
ACS9	1-amino-cyclopropane-1-carboxylate synthase 9	AT3G49700	BjuVA03G46900	-	-	-	-
			BjuVA06G17830	-	-	-	-
			BjuVB02G61830	-	-	-	-
			BjuVB08G49080	-	-	-	-
ACS11	1-amino-cyclopropane-1-carboxylate synthase 11	AT4G08040	BjuVB08G28160	-	-	-	-2.43589
			BjuVA03G27460	-	-	-	-
ACO1	1-aminocyclopropane-1-carboxylate oxidase 1	AT2G19590	BjuVA09G59120	-	-	-	-
			BjuVA07G01280	-	-	-	-
			BjuVB02G11940	-	-	-	-
			BjuVB03G58220	-	-	-	-
ACO2	1-aminocyclopropane-1-carboxylate oxidase 2	AT1G62380	BjuVA03G08700	-	-	-	-
			BjuVA03G08840	-	-	-	-
ACO4	1-aminocyclopropane-1-carboxylate oxidase 4	AT1G05010	BjuVA10G03480	-	1.08832	1.21672	1.18309
			BjuVB06G38830	-	-	-	-
Note: "-" represents that the expression of the gene has not been detected in the leaves, or the foldchange and statistical analysis cannot be performed due to the poor reproducibility of the gene expression among the biological replicates.
(Yellow: differential expression genes)

## Sheet: salicylic acid
Table S11. Gene expression data involved in other hormones biosynthesis pathway after beet armyworm larvae chewing in vegetable mustard.
Gene name	Description	At_ID	Gene_ID	1 h/CK Log2FC	24 h/CK Log2FC	48 h/CK Log2FC	72 h/CK Log2FC
NFXL1	nf-x-like 1	AT1G10170	BjuVA09G64940	-	-	-	-
			BjuVA08G34730	-	-	-	-
			BjuVB03G03490	-	-	-	-
			BjuVB04G27250	-	-	-	-
			BjuVA06G06470	-	-	-	-
ICS2	isochorismate synthase 2	AT1G18870	BjuVB03G07600	-	-	-	-
			BjuVA08G30560	-	-	-	-
			BjuVA06G14570	-	-	-	-
			BjuVB04G30720	-	-	-	-
CBP60G	cam-binding protein 60-like g	AT5G26920	BjuVA09G05300	-	-	-	-
			BjuVB02G65290	-	-	-	-1.38293
			BjuVB07G21010	-1.13109	1.01173	1.48962	1.47068
			BjuVA06G36170	-1.4022	-	-	-1.82153
			BjuVB04G04360	-	-	-	-
			BjuVA02G44420	-	-	-	-
EPS1	enhanced pseudomonas susceptibilty 1	AT5G67160	BjuVA07G16990	-	-	-	-
			BjuVB06G15560	-	-	-	-
			BjuVB07G16650	-	-	-	-
			BjuVA02G49320	-	-	-	-
			BjuVA09G09460	-	-	-	-
PHB3	prohibitin 3	AT5G40770	BjuVB01G21440	-	-	-	-
			BjuVA04G14180	-	-	-	-
			BjuVA07G20870	-	-	-	-
DLO2	dmr6-like oxygenase 2	AT4G10490	BjuVA03G28420	-	-	-	-
			BjuVB08G29390	-	-	-	-
			BjuVB08G41820	-	-	-	-
			BjuVA09G28220	-	-	-	-
			BjuVA03G28430	-	-	-	-
			BjuVB08G29420	-	-	-	2.22089
PAL1	phenylalnine ammonialyase 1	AT2G37040	BjuVA04G28210	-	-	-1.00438	-1.81259
			BjuVB06G08440	1.0625	-	-1.74076	-2.4185
			BjuVA05G08660	1.75394	-	-1.30785	-1.59571
			BjuVB01G06880	1.30545	-	-2.04479	-2.75193
			BjuVB08G19130	-	-	-	-
			BjuVB08G19160	-	-	-	-
			BjuVB08G19170	-	-	-	-
			BjuVB08G19200	-	-	-	-
DMR6	downy mildew resistant 6	AT5G24530	BjuVB04G03320	-	-	-	1.6282
			BjuVA02G45740	-	-	-	-
			BjuVB02G63830	-	-	-	-
			BjuVA06G34290	1.14587	-	-1.53325	-
Note: "-" represents that the expression of the gene has not been detected in the leaves, or the foldchange and statistical analysis cannot be performed due to the poor reproducibility of the gene expression among the biological replicates.
(Yellow: differential expression genes)
