# Supplementary material for: Transcriptome Dynamics of Brassica juncea Leaves in Response to Omnivorous Beet Armyworm (Spodoptera exigua, Hübner)
Source: Int J Mol Sci. 2023 Nov 24;24(23):16690. doi: 10.3390/ijms242316690 (PMC10706706; doi:10.3390/ijms242316690)
Supplement: Supplementary file 1 [file ijms-24-16690-s001.zip › Table S12.xlsx]

## Sheet: Sheet1
Table S12. Gene expression data involved in JA metabolism pathway after beet armyworm larvae chewing in vegetable mustard.
Gene name	Description	At_ID	Gene_ID	1 h/CK Log2FC	24 h/CK Log2FC	48 h/CK Log2FC	72 h/CK Log2FC
JAR1	jasmonoyl isoleucine synthetase 1	AT2G46370	BjuVB06G01190	1.07813	-	-	2.66484
			BjuVB08G24940	-	-	-	3.85558
			BjuVA03G25090	2.21744	-	-	5.12479
			BjuVA05G01430	-	-	-	-
			BjuVA04G34190	-	-	-	-
			BjuVB01G00860	-	-	-	-
IAR3	jasmonic acid responsive 3	AT1G51760	BjuVA06G01780	-	-	3.92911	4.25662
			BjuVA05G19070	1.08376	-	1.78892	2.90867
			BjuVB04G47150	3.14417	-	4.67618	5.70083
			BjuVB06G27210	1.83658	1.53218	2.60869	3.37854
ILL6	IAA-leucine resistant (ILR)-like gene 6	AT1G44350	BjuVA10G07640	-	-	-	2.03813
			BjuVB04G53670	3.47643	3.36053	4.74017	7.2767
JMT	JA methyltransferase	AT1G19640	BjuVB03G07960	3.19807	-	-	-
			BjuVB03G26660	-	-	-	-
			BjuVA08G30170	-	-	-	-
			BjuVA06G15390	-	-	-	-
			BjuVA07G16400	-	-	-	-
			BjuVB04G31410	-	-	-	-
JOX1	jasmonate-induced oxygenases 1	AT3G11180	BjuV_Contig01043G00130	-	-	-	-
			BjuVA05G38300	-	-	-	-
			BjuVB07G04510	-	-	-	-
			BjuVB01G43020	-	-	-	-
JOX2	jasmonate-induced oxygenases 2	AT5G05600	BjuVB08G01170	3.10771	3.70184	4.75378	6.33691
			BjuVA03G02190	5.03529	5.87306	6.79356	8.63206
			BjuVB05G27780	-	-	3.47589	4.87969
			BjuVA02G02010	-	-	2.67789	3.02188
JOX3	jasmonate-induced oxygenases 3	AT3G55970	BjuVB08G54770	-	-	-	8.65349
			BjuVA04G04410	-	-	-	-
			BjuVA09G48250	-	-	-	-
			BjuVB06G55570	-	-	-	-
JOX4	jasmonate-induced oxygenases 4	AT2G38240	BjuVB01G05960	-	-	4.75382	6.13378
			BjuVA04G29130	-	-	-	7.4569
			BjuVA03G20760	-	-	5.82982	8.14684
			BjuVB08G19960	-	-	-	-
ST2A	12-OH-JA sulfotransferase	AT5G07010	BjuVB02G41770	4.57431	-	-	-
			BjuVA03G02750	8.01948	-	-	-
			BjuVA02G02460	-	-	-	-
			BjuVA10G29340
			BjuVB08G01450	-	-	-	-
			BjuVB05G27200	-	-	-	-
CYP94B3	JA-Ile-12-hydroxylase	AT3G48520	BjuVA06G19010	-	3.40001	4.6147	5.17343
			BjuVB08G47980	-	-	-	-
			BjuVB06G23210	-	-	-	-
			BjuVA06G26450	-	-	-	-
CYP94C1	12-OH-JA-Ile carboxylase	AT2G27690	BjuVB06G17130	-	-	3.42001	3.52903
			BjuVA07G18530	-	4.32362	7.10355	7.65917
Note: "-" represents that the expression of the gene has not been detected in the leaves, or the foldchange and statistical analysis cannot be performed due to the poor reproducibility of the gene expression among the biological replicates.
(Yellow: differential expression genes)
