# Supplementary material for: Transcriptome Dynamics of Brassica juncea Leaves in Response to Omnivorous Beet Armyworm (Spodoptera exigua, Hübner)
Source: Int J Mol Sci. 2023 Nov 24;24(23):16690. doi: 10.3390/ijms242316690 (PMC10706706; doi:10.3390/ijms242316690)
Supplement: Supplementary file 1 [file ijms-24-16690-s001.zip › Table S13.xlsx]

## Sheet: Sheet1
Table S13. Gene expression data involved in JA signaling pathway after beet armyworm larvae chewing in vegetable mustard.
Gene name	Description	At_ID	Gene_ID	1 h/CK Log2FC	24 h/CK Log2FC	48 h/CK Log2FC	72 h/CK Log2FC
VSP1	vegetative storage protein 1	AT5G24780	BjuVB04G03430	2.5232	8.39219	9.75952	10.1227
VSP2	vegetative storage protein 2	AT5G24770	BjuVA02G45630	2.69538	6.05813	8.43415	7.97736
JR2	jasmonic acid responsive 2	AT4G23600	BjuVA01G15450	2.68887	2.80718	4.74257	4.76605
			BjuVA08G16310	-	-	1.02715	-
			BjuVB05G13420	-	1.44264	-	2.88924
			BjuVB05G13430	-	-	-	-
			BjuVA03G53600	-	-	-	-
			BjuVA03G53640	-	-	-	-
			BjuVB02G67020	-	-	-	-
COI1	coronatine insensitive 1	AT2G39940	BjuVA05G06360	-	-	-	-1.25236
			BjuVB08G21320	-	-	-	-
			BjuVA03G22000	-	-	-	-
			BjuVB06G06090	-	-	-	-
			BjuVB01G04940	-	-	-	-
			BjuVA04G30200	-	-	-	-
			BjuVA04G30210	-	-	-	-
ASK1	Arabidopsis SKP1 homolog 1	AT1G10940	BjuVA06G07480	-	-	-	-
			BjuVA08G34300	-	-	-	-
			BjuVB04G26450	-	-	-	-
			BjuVB03G03970	-	-	-	-
			BjuVB02G04290	-	-	-	-
CULLIN 1	CUL1	AT4G02570	BjuVA03G30300	-	-	-	-
			BjuVB05G45340	-	-	-	-
			BjuVB08G36970	-	-	-	-
			BjuVB08G32480	-	-	-	-
RBX1	ring box 1	AT5G20570	BjuVA10G19680	-	-	-	-
			BjuVA03G09920	-	-	-	-
			BjuVB02G31140	-	-	-	-
			BjuVB08G08050	-	-	-	-
			BjuVB05G37770	-	-	-	-
JAZ1	jasmonate ZIM domain 1	AT1G19180	BjuVB03G07760	-	2.4132	3.23913	3.74663
			BjuVA08G30380	-	2.52038	3.9953	3.93031
			BjuVB03G26490	2.644	3.35842	6.4242	6.27197
			BjuVA06G14780	-	3.21769	5.06273	4.80173
JAZ2	jasmonate ZIM domain 2	AT1G74950	BjuVA07G40690	-	1.96981	2.86045	3.487
			BjuVB03G47470	-	1.5832	2.6222	2.83441
			BjuVA07G29330	-	2.5251	3.60256	4.17079
			BjuVB05G56940	1.90832	2.19811	2.85305	3.01176
			BjuVA02G24440	-	-	1.62434	2.08278
			BjuVB06G41060	-	2.78822	4.25415	5.16437
JAZ3	jasmonate ZIM domain 3	AT3G17860	BjuVA05G32000	-	-	1.22768	1.64485
			BjuVB01G37050	-	-	1.38428	2.25564
			BjuVB07G08860	1.17895	-	2.20652	2.53906
			BjuVA01G37800	-	1.5835	2.71285	2.86983
JAZ5	jasmonate ZIM domain 5	AT1G17380	BjuVB03G06770	-	1.97234	2.43688	2.7138
			BjuVA09G60250	-	2.06103	2.32245	1.90234
			BjuVA08G31360	-	3.52328	5.16725	5.46608
			BjuVB04G29420	-	-	8.58355	8.5564
			BjuVA06G12950	-	-	-	-
JAZ6	jasmonate ZIM domain 6	AT1G72450	BjuVB05G55520	-	1.32287	1.68266	1.12285
			BjuVA07G38730	-	3.02801	3.78729	3.4914
			BjuVB03G45210	-	2.43785	3.91032	4.37678
			BjuVA02G23020	-	-	-	-
JAZ7	jasmonate ZIM domain 7	AT2G34600	BjuVB08G17790	-	1.83333	3.89247	2.36558
			BjuVB01G08710	-	-	6.86608	5.88268
			BjuVA04G26550	-	-	5.72017	-
			BjuVB06G10290	-	-	-	-
			BjuVA05G10670	-	-	-	-
JAZ8	jasmonate ZIM domain 8	AT1G30135	BjuVB03G15660	-	3.43959	5.11753	3.9206
			BjuVA09G36550	-	-	6.14395	5.74242
			BjuVA08G25190	-	-	7.5301	6.46907
			BjuVB04G40150	-	-	4.05661	4.39817
JAZ9	jasmonate ZIM domain 9	AT1G70700	BjuVB03G43250	1.20283	2.56323	2.69197	3.67405
			BjuVA02G21850	1.87761	3.50701	3.6473	4.4632
			BjuVA07G37280	1.13507	2.27524	2.89106	3.10912
			BjuVB05G54190	1.06143	2.13004	2.22802	2.76532
			BjuVA07G31220	1.85606	3.36054	4.68461	5.28094
JAZ10	jasmonate ZIM domain 10	AT5G13220	BjuVB08G04130	-	-	4.96551	5.18541
			BjuVA10G25430	-	-	6.77408	7.07315
			BjuVA03G05630	-	-	5.66871	5.5153
			BjuVB02G37190	-	-	8.1392	8.56855
			BjuVB05G24040	-	-	2.59031	-
			BjuVA02G05100	-	-	-	-
JAZ12	jasmonate ZIM domain 12	AT5G20900	BjuVB02G30850	-	-	1.32675	1.64428
			BjuVA10G19380	-	-	1.40879	1.54462
			BjuVA02G09780	-	-	1.10337	1.3828
			BjuVB05G37560	-	-	1.64895	1.56419
			BjuVB05G37550	-	-	-	-
JAZ13	jasmonate ZIM domain 13	AT3G22275	BjuVB01G31870	-	-	8.85785	6.8627
			BjuVA05G26560	-	-	7.07714	-
			BjuVB07G26830	-	-	-	-
NINJA	novel interactor of JAZ	AT4G28910	BjuVA01G09210	-	-	-	-
			BjuVA03G57520	-	-	-	-
			BjuVB05G08510	-	-	-	-
			BjuVB02G70030	-	-	-	-
TPL	topless	AT1G15750	BjuVA06G11400	-	-	-	-
			BjuVA09G61160	-	-	-	-
			BjuVB06G34680	-	-	-	-
			BjuVB03G24880	-	-	-	-
HDA6	histone deacetylase 6	AT5G63110	BjuVB07G18200	-	-	-	-
			BjuVB06G12280	-	-	-	-
			BjuVA09G07940	-	-	-	-
			BjuVA06G28800	-	-	-	-
HDA19	histone deacetylase 9	AT4G38130	BjuV_Contig00807G00160	-	-	-	-
			BjuVA01G44580	-	-	-	-
JAM1	jasmonate associated associated MYC2-like TF	AT2G46510	BjuVB06G01060	-	1.54659	2.5804	1.81058
			BjuVA05G01310	-	1.3186	2.26108	1.73567
			BjuVB01G00790	-	-	-	-
			BjuVA04G34240	-	-	-	-
			BjuVB08G25010	-	-	-	-
JAM2	jasmonate associated associated MYC2-like TF	AT1G01260	BjuVB03G33510	-	-	1.21979	-
			BjuVA10G00560	-	-	-	-
JAM3	jasmonate associated associated MYC2-like TF	AT4G16430	BjuVB05G19640	1.42996	1.8009	2.48945	2.4777
			BjuVB02G59870	-	-	-	-
			BjuVA03G49150	-	-	-	-
			BjuVA01G21700	-	-	-	-
MYC2	bHLH subgroup IIIe TFs	AT1G32640	BjuVB04G42830	-	-	1.56515	2.06043
			BjuVA05G24810	-	1.13625	1.28432	1.15598
			BjuVB03G15700	-	-	1.08041	-
			BjuVB03G32300	-	-	-	-
MYC3	bHLH subgroup IIIe TFs	AT5G46760	BjuVA06G44820	-	-	-	1.53793
			BjuVB04G14630	-	-	1.47607	2.05718
			BjuVB02G49380	-	-	-	-
			BjuVA09G22490	-	-	-	-
MYC4	bHLH subgroup IIIe TFs	AT4G17880	BjuVA01G10120	1.71548	-	-	-
			BjuVB05G18190	1.06396	-	-1.81258	-1.66111
NAC019	NAM/ATAF/CUC (NAC) TFs 019	AT1G52890	BjuVA06G01000	-	-	2.32133	-
			BjuVB04G48230	-	1.1723	2.51175	1.06846
NAC055	NAM/ATAF/CUC (NAC) TFs 055	AT3G15500	BjuVA05G34030	-	-	1.62388	-
			BjuVB01G39090	-	-	-	-
			BjuVA01G39870	-	-	-	-
			BjuVA03G38590	-	-	-	-
NAC072	NAM/ATAF/CUC (NAC) TFs 072	AT4G27410	BjuVA01G19270	-	-	2.58103	2.40283
			BjuVB05G09920	-	-	-	-
			BjuVB02G69150	-	-	-	-
			BjuVA03G56230	-	-	-	-
Note: "-" represents that the expression of the gene has not been detected in the leaves, or the foldchange and statistical analysis cannot be performed due to the poor reproducibility of the gene expression among the biological replicates.
(Yellow: differential expression genes)
